# Supplementary material for: Construction of polycyclic structures with vicinal all-carbon quaternary stereocenters via an enantioselective photoenolization/Diels–Alder reaction
Source: Royal Society of Chemistry journal article supplement (doi:10.1039/d1sc00883h), 2021-01-01
Supplement: d1sc00883h1.pdf [file d1sc00883h1.pdf]

## Supporting Information

### **Construction of Polycyclic Structures with Vicinal All-Carbon Quaternary Stereocenters via Enantioselective Photoenolization/Diels–Alder Reaction**

Min Hou, Mengmeng Xu, Baochao Yang, Haibing He, Shuanhu Gao\*

# Contents

|             |                                                                  |            |
|-------------|------------------------------------------------------------------|------------|
| <b>I.</b>   | <b>General Information</b>                                       | <b>S3</b>  |
| <b>II.</b>  | <b>UV-vis absorption spectrum</b>                                | <b>S4</b>  |
| <b>III.</b> | <b>Control Experiments</b>                                       | <b>S5</b>  |
| <b>IV.</b>  | <b>Nonlinear effect</b>                                          | <b>S7</b>  |
| <b>V.</b>   | <b>Ligand synthesis</b>                                          | <b>S8</b>  |
| <b>VI.</b>  | <b>General Procedures for the enantioselective PEDA reaction</b> | <b>S12</b> |
| <b>VII.</b> | <b>NMR and HPLC Spectra</b>                                      | <b>S24</b> |

## I. General Information

General Experimental Procedures. All reactions were carried out under nitrogen except noted. Anhydrous dichloromethane, toluene, acetonitrile and dimethylformamide were purified by the PS-MD5 (Innovative Technology) solvent purification system. Tetrahydrofuran and anhydrous diethyl ether were distilled from sodium-benzophenone ketyl. All other commercial reagents were used as received. Flash column chromatography was performed as described by Still, employing Qingdao Haiyang silica gel 60 (200–300 mesh). TLC analyses were performed on EMD 250  $\mu\text{m}$  Silica Gel HSGF254 plates and visualized by quenching of UV fluorescence ( $\lambda_{\text{max}} = 254 \text{ nm}$ ), or by staining ceric ammonium molybdate, phosphomolybdic acid, or potassium permanganate.  $^1\text{H}$  and  $^{13}\text{C}$  NMR spectra were recorded on a Bruker 500, 400 spectrometer. Chemical shifts for  $^1\text{H}$  and  $^{13}\text{C}$  NMR spectra are reported in ppm ( $\delta$ ) relative to residue protium in the solvent ( $\text{CDCl}_3$ :  $\delta$  7.26, 77.0 ppm, and the multiplicities are presented as follows: s = singlet, d = doublet, t = triplet, q = quartet, m = multiplet, brs = broad single. High-resolution mass spectra (HRMS) were acquired on Waters Micromass GCT Premier or Bruker Daltonics, Inc. APEXIII 7.0 TESLA FTMS. Mass spectra were acquired on Agilent 5975C. The  $[\alpha]_{\text{D}}$  was recorded using Anton Paar MCP 5500. Infrared (IR) spectra were obtained using a Shimadzu IRTracer-100 fourier transform infrared spectroscopy (FTIR). Electronic circular dichroism (ECD) spectra and corresponding ultraviolet–visual spectra were obtained on a JASCO J-815 CD spectrometer. HPLC analysis on chiral stationary phase was performed on an Agilent 1200-series instrument, employing Daicel Chiralpak OD-H, AS-H, OJ-H and IG chiral columns. The photo reactor used for this photolysis is Rayonet RPR-200 (Southern New England Ultraviolet Company). The peristaltic pump used for this flow PEDDA reaction is BT 100-1F (Longer precision pump Co., Ltd.).

## II. UV-vis absorption spectrum

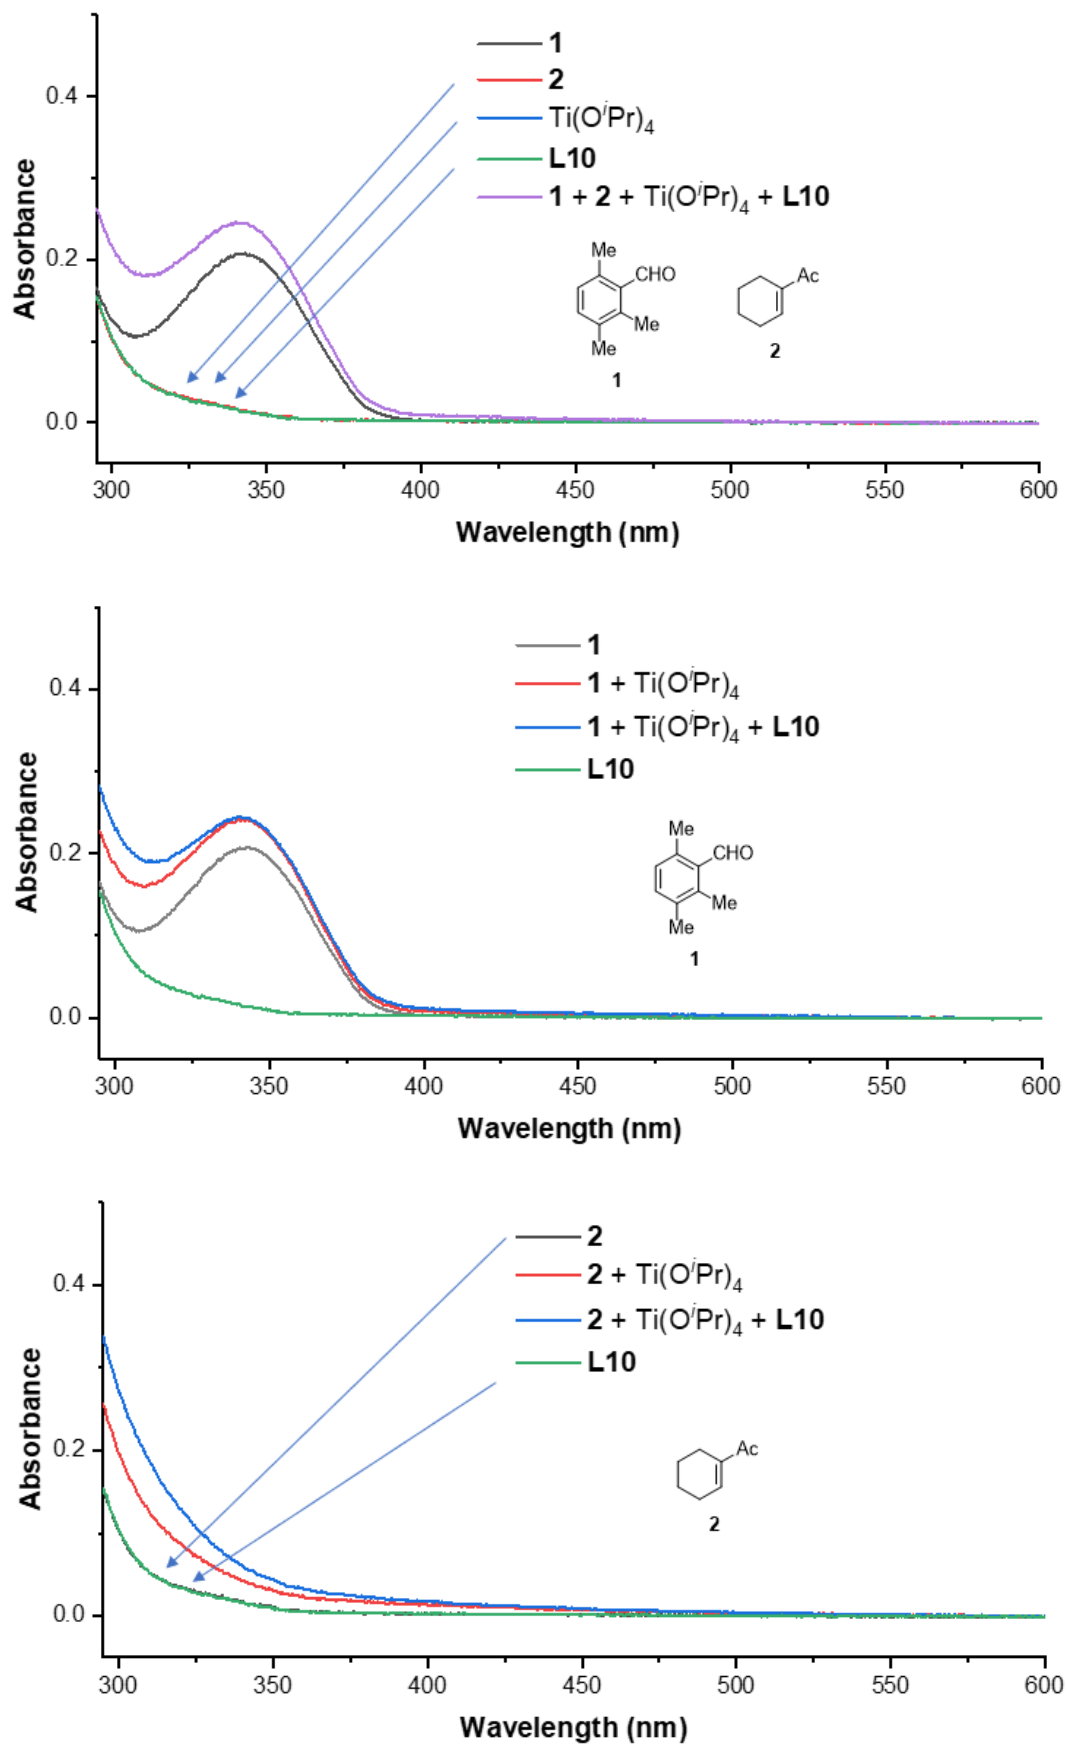

**Figure S1.** Absorption spectra of the reaction mixture in toluene ( $5 \times 10^{-5}$  M)

### III. Control Experiments

**Table S1.** Investigation of different kinds of ligands.

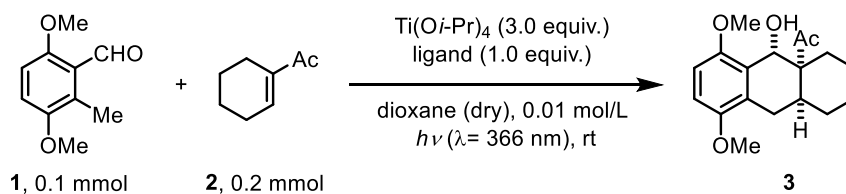

| entry | ligand    | T/°C | time | conversion (%) <sup>a</sup> | yield(%) <sup>a</sup> | ee(%) |
|-------|-----------|------|------|-----------------------------|-----------------------|-------|
| 1     | <b>La</b> | 36   | 3 h  | 100                         | ND                    | ND    |
| 2     | <b>Lb</b> | 25   | 3 h  | 96                          | ND                    | ND    |
| 3     | <b>Lc</b> | 25   | 3 h  | 98                          | 12                    | 0     |
| 4     | <b>Ld</b> | 25   | 4 h  | 62                          | 18                    | 5     |
| 5     | <b>Le</b> | 24   | 3 h  | 36                          | 10                    | 47    |
| 6     | <b>Lf</b> | 24   | 3 h  | 56                          | 18                    | 45    |
| 7     | <b>Lg</b> | 24   | 3 h  | 64                          | 20                    | 50    |
| 8     | <b>Lh</b> | 24   | 4 h  | 62                          | 16                    | 0     |
| 9     | <b>Li</b> | 36   | 3 h  | 42                          | ND                    | ND    |
| 10    | <b>Lj</b> | 36   | 3 h  | 60                          | ND                    | ND    |
| 11    | <b>Lk</b> | 36   | 3 h  | 100                         | 70                    | 67    |

<sup>a</sup>Crude <sup>1</sup>H NMR conversion and yield with 1,3,5-Trimethoxybenzene as internal standard.

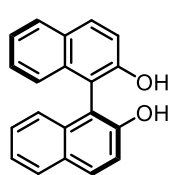

**La**, (S)-BINOL

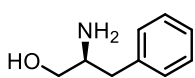

**Lb**

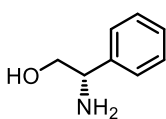

**Lc**

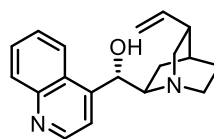

**Ld**, cinchonine

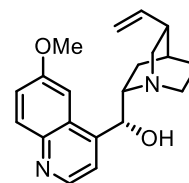

**Le**, quinine

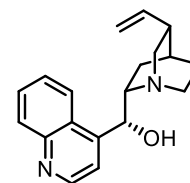

**Lf**, cinchonidine

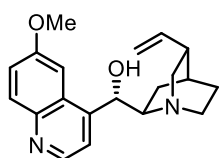

**Lg**, quinidine

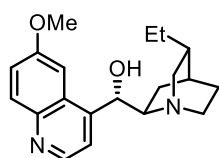

**Lh**

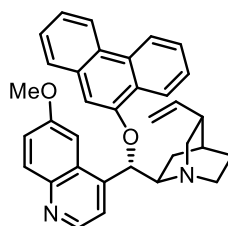

**Li**

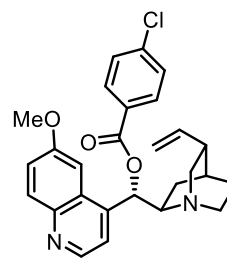

**Lj**

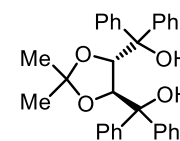

**Lk**, TADDOL

**Table S2.** Condition optimization: solvent, dosage of Ti(O*i*-Pr)<sub>4</sub> and **L10**.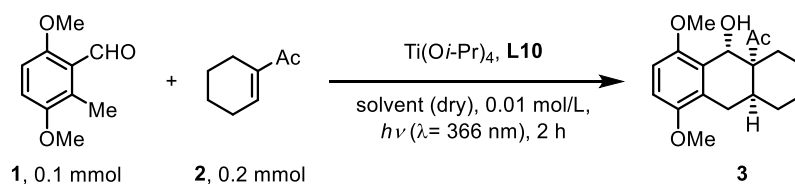

| entry           | Ti(O <i>i</i> -Pr) <sub>4</sub> | <b>L10</b> | solvent | yield(%) <sup>a</sup> | ee(%) |
|-----------------|---------------------------------|------------|---------|-----------------------|-------|
| 1               | 3.0 equiv.                      | 1.0 equiv. | dioxane | 79                    | 85    |
| 2               | 3.0 equiv.                      | 1.0 equiv. | THF     | 48                    | 72    |
| 3               | 3.0 equiv.                      | 1.0 equiv. | DCM     | 57                    | 90    |
| 4               | 3.0 equiv.                      | 1.0 equiv. | DCE     | 67                    | 90    |
| 5               | 3.0 equiv.                      | 1.0 equiv. | toluene | 70                    | 91    |
| 6               | 2.0 equiv.                      | 1.0 equiv. | toluene | 64                    | 93    |
| 7               | 1.0 equiv.                      | 1.0 equiv. | toluene | 62                    | 91    |
| 8               | 1.0 equiv.                      | 0.5 equiv. | toluene | 50                    | 89    |
| 9               | 0.5 equiv.                      | 0.5 equiv. | toluene | 47                    | 82    |
| 10              | 0.8 equiv.                      | 0.4 equiv. | toluene | 38                    | 85    |
| 11              | 0.6 equiv.                      | 0.3 equiv. | toluene | 22                    | 78    |
| 12              | 0.4 equiv.                      | 0.2 equiv. | toluene | trace                 | -     |
| 13              | 0.2 equiv.                      | 0.1 equiv. | toluene | trace                 | -     |
| 14              | 2.0 equiv.                      | 0.8 equiv. | toluene | 54                    | 89    |
| 15              | 2.0 equiv.                      | 0.5 equiv. | toluene | 48                    | 89    |
| 16              | 2.0 equiv.                      | 0.2 equiv. | toluene | 45                    | 70    |
| 17 <sup>b</sup> | 1.0 equiv.                      | 0.5 equiv. | toluene | 78                    | 90    |
| 18 <sup>c</sup> | 1.0 equiv.                      | 0.5 equiv. | toluene | 72                    | 90    |

<sup>a</sup>Yields determined by <sup>1</sup>H NMR analysis using internal standard.

<sup>b</sup>dosage of **2** is 1.5 equiv.; <sup>c</sup>dosage of **2** is 1.0 equiv.

**Table S3.** Condition optimization: additive screening.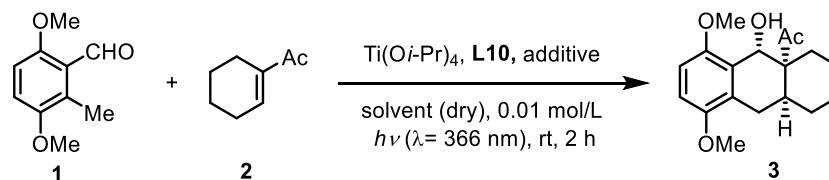

| entry          | solvent | additive          | yield(%) <sup>c</sup> | ee(%) |
|----------------|---------|-------------------|-----------------------|-------|
| 1 <sup>a</sup> | toluene | --                | 70                    | 91    |
| 2 <sup>b</sup> | toluene | --                | 78                    | 90    |
| 3 <sup>b</sup> | toluene | Et <sub>3</sub> N | 64                    | 88    |
| 4 <sup>b</sup> | toluene | IMD.              | 52                    | 91    |
| 5 <sup>b</sup> | toluene | HMTA              | 85                    | 88    |
| 6 <sup>b</sup> | toluene | DABCO             | 82                    | 92    |
| 7 <sup>b</sup> | toluene | Quin.             | 89                    | 91    |

<sup>a</sup> The reaction was conducted in **1** (1.0 equiv.), **2** (2.0 equiv.), Ti(O*i*-Pr)<sub>4</sub> (3.0 equiv.), **L10** (1.0 equiv.)

<sup>b</sup> The reaction was conducted in **1** (1.0 equiv.), **2** (1.5 equiv.), Ti(O*i*-Pr)<sub>4</sub> (1.0 equiv.), **L10** (0.5 equiv.) and additive (1.0 equiv.).

<sup>c</sup> Crude <sup>1</sup>H NMR yield with 1,3,5-trimethoxybenzene as internal standard.

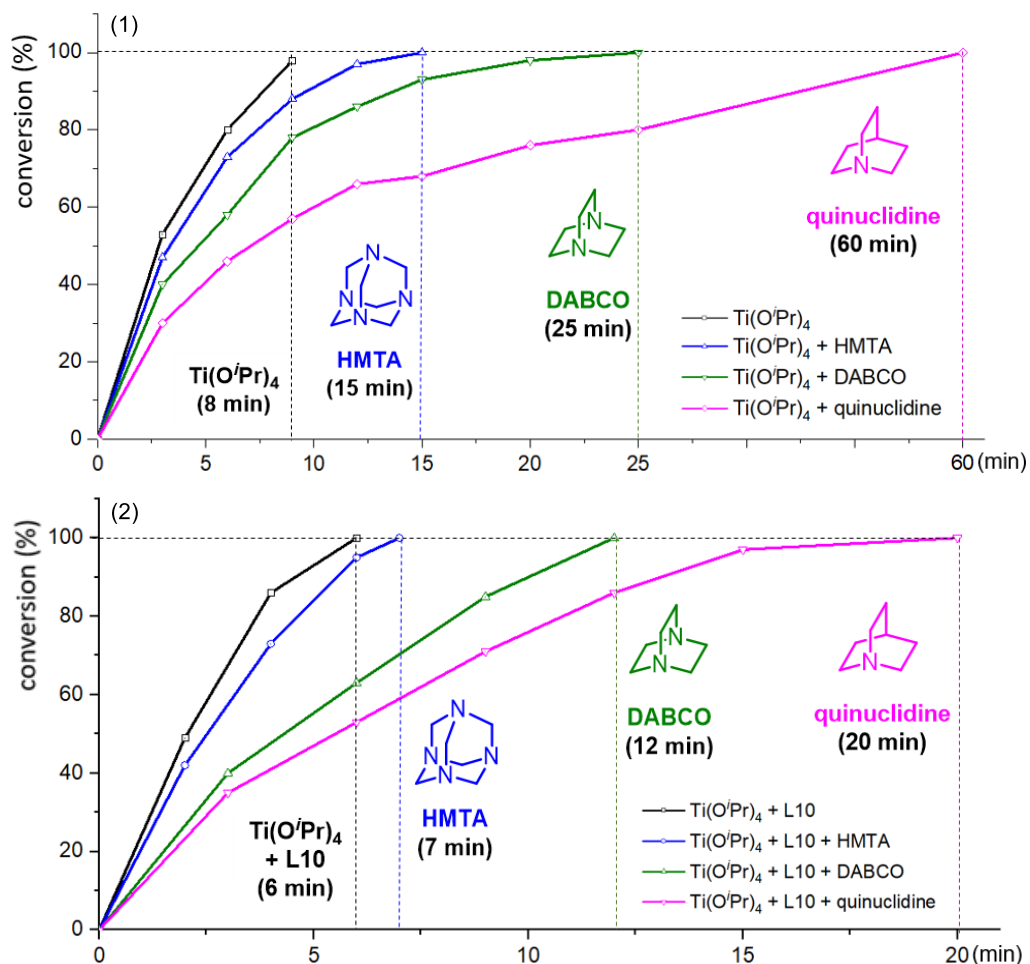

**Figure S2.** Dynamic studies.

**Table S4.** Condition optimization: dosage of DABCO.

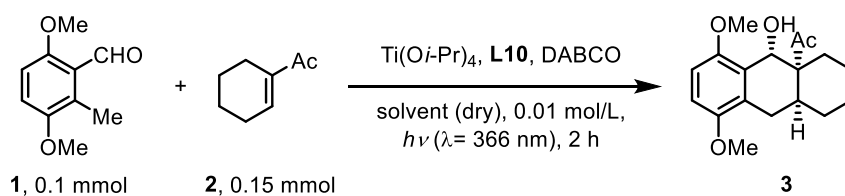

| entry | Ti(O <sub>i</sub> -Pr) <sub>4</sub> | L10        | DABCO      | yield(%) <sup>a</sup> | ee(%) |
|-------|-------------------------------------|------------|------------|-----------------------|-------|
| 1     | 1.0 equiv.                          | 0.5 equiv. | 0.5 equiv. | 78                    | 90    |
| 2     | 1.0 equiv.                          | 0.5 equiv. | 1.0 equiv. | 82                    | 92    |
| 3     | 1.0 equiv.                          | 0.5 equiv. | 2.0 equiv. | 70                    | 94    |
| 4     | 1.0 equiv.                          | 0.5 equiv. | 3.0 equiv. | 68                    | 95    |
| 5     | 1.0 equiv.                          | 0.4 equiv. | 1.0 equiv. | 60                    | 90    |
| 6     | 0.8 equiv.                          | 0.4 equiv. | 0.8 equiv. | 56                    | 92    |
| 7     | 0.6 equiv.                          | 0.3 equiv. | 0.6 equiv. | 54                    | 93    |
| 8     | 0.4 equiv.                          | 0.2 equiv. | 0.4 equiv. | 52                    | 93    |

<sup>a</sup>Yields determined by <sup>1</sup>H NMR analysis using internal standard.

**Table S5-1.** Catalytic asymmetric PEDA reaction: additive screening.

| entry <sup>a</sup> | Ti(O <i>i</i> -Pr) <sub>4</sub> | L10        | additive          | time | conversion | yield <sup>c</sup> | ee  |
|--------------------|---------------------------------|------------|-------------------|------|------------|--------------------|-----|
| 1                  | 0.4 equiv.                      | 0.2 equiv. | -                 | 1 h  | 100%       | 60%                | 82% |
| 2 <sup>b</sup>     | 0.4 equiv.                      | 0.2 equiv. | -                 | 1 h  | 100%       | 53%                | 87% |
| 3                  | 0.4 equiv.                      | 0.2 equiv. | <sup>i</sup> PrOH | 1 h  | 100%       | 53%                | 83% |
| 4                  | 0.4 equiv.                      | 0.2 equiv. | HFIP              | 1 h  | 100%       | 9%                 | 70% |
| 5                  | 0.4 equiv.                      | 0.2 equiv. | DABCO             | 1 h  | 100%       | 58%                | 75% |

<sup>a</sup> The reaction was conducted in **1** (1.0 equiv.), **2** (1.5 equiv.), additive (1.0 equiv.).

<sup>b</sup> Prepared chiral catalyst (without <sup>i</sup>PrOH) was used.

<sup>c</sup> Crude <sup>1</sup>H NMR yield with 1,3,5-trimethoxybenzene as internal standard.

**Table S5-2.** Catalytic asymmetric PEDA reaction: wavelength screening.

| entry <sup>a</sup> | Ti(O <i>i</i> -Pr) <sub>4</sub> | L10        | <i>hν</i> (nm) | time | conversion | yield <sup>c</sup> | ee  |
|--------------------|---------------------------------|------------|----------------|------|------------|--------------------|-----|
| 1                  | 1.0 equiv.                      | 0.5 equiv. | 300            | 1 h  | 100%       | 28%                | 77% |
| 2                  | 1.0 equiv.                      | 0.5 equiv. | 366            | 1 h  | 100%       | 78%                | 90% |
| 3                  | 0.4 equiv.                      | 0.2 equiv. | 366            | 1 h  | 100%       | 60%                | 82% |
| 4                  | 1.0 equiv.                      | 0.5 equiv. | 419            | 1 h  | 58%        | 50%                | 92% |
| 5                  | 0.4 equiv.                      | 0.2 equiv. | 419            | 1 h  | 42%        | 37%                | 91% |
| 6 <sup>b</sup>     | 0.4 equiv.                      | 0.2 equiv. | 419            | 1 h  | 32%        | 22%                | 87% |
| 7                  | 1.0 equiv.                      | 0.5 equiv. | 575            | 1 h  | 48%        | 39%                | 89% |
| 8                  | 0.4 equiv.                      | 0.2 equiv. | 575            | 1 h  | 45%        | 27%                | 89% |

<sup>a</sup> The reaction was conducted in **1** (1.0 equiv.), **2** (1.5 equiv.).

<sup>b</sup> Prepared chiral catalyst (without <sup>i</sup>PrOH) was used.

<sup>c</sup> Crude <sup>1</sup>H NMR yield with 1,3,5-trimethoxybenzene as internal standard.

**Table S5-3.** Catalytic asymmetric PEDA reaction: the ratio of titanium to ligand screening.

| entry <sup>a</sup> | Ti(O <i>i</i> -Pr) <sub>4</sub> | L10        | <i>hν</i> (nm) | time      | conversion | yield <sup>c</sup> | ee  |
|--------------------|---------------------------------|------------|----------------|-----------|------------|--------------------|-----|
| 1                  | 0.4 equiv.                      | 0.2 equiv. | 366            | 1.5 h     | 100%       | 49%                | 94% |
| 2 <sup>b</sup>     | 0.4 equiv.                      | 0.2 equiv. | 366            | 1.5 h     | 64%        | 15%                | 92% |
| 3                  | 0.4 equiv.                      | 0.2 equiv. | 419/366        | 2+1 h     | 48%        | 23%                | 95% |
| 4                  | 0.5 equiv.                      | 0.2 equiv. | 366            | 1.5 h     | 100%       | 84%                | 96% |
| 5                  | 0.5 equiv.                      | 0.2 equiv. | 419/366        | 3+1.5 h   | 67%        | 27%                | 94% |
| 6                  | 0.6 equiv.                      | 0.2 equiv. | 366            | 1.5 h     | 100%       | 88%                | 89% |
| 7                  | 0.6 equiv.                      | 0.2 equiv. | 419/366        | 2+1 h     | 88%        | 74%                | 96% |
| 8                  | 0.6 equiv.                      | 0.2 equiv. | 419/366        | 2.5+1.5 h | 100%       | 83%                | 93% |
| 9                  | 1.0 equiv.                      | 0.2 equiv. | 366            | 1.5 h     | 100%       | 92%                | 78% |
| 10                 | 1.0 equiv.                      | 0.2 equiv. | 419            | 6 h       | 30%        | 26%                | 84% |
| 11                 | 2.0 equiv.                      | 0.2 equiv. | 366            | 1.5 h     | 100%       | 81%                | 68% |
| 12                 | 2.0 equiv.                      | 0.2 equiv. | 419            | 6 h       | 24%        | 20%                | 78% |

<sup>a</sup> The reaction was conducted in **1a** (1.0 equiv.), **45** (1.5 equiv.). <sup>b</sup> Prepared chiral catalyst (without <sup>i</sup>PrOH) was used.

<sup>c</sup> Crude <sup>1</sup>H NMR yield with 1,3,5-trimethoxybenzene as internal standard.



**Table S5-4.** Catalytic asymmetric PEDA reaction.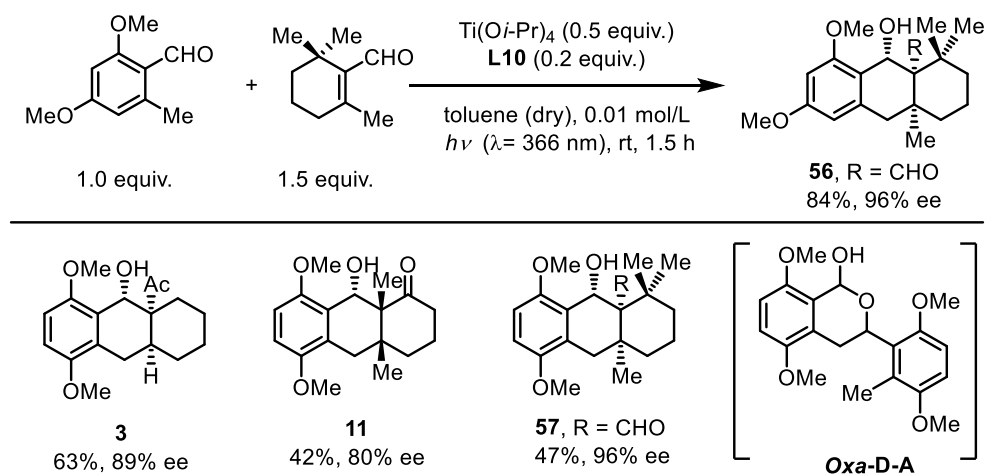**Table S6.** Controlling of diastereoselectivity in PEDA reaction.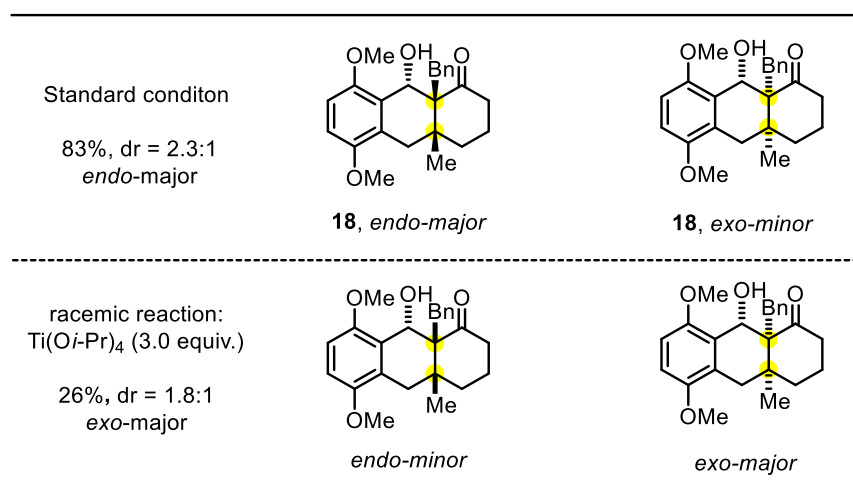

**IV. Nonlinear effect of the ligand accelerated enantioselective PEDA reaction:** To a solution of aromatic aldehyde (0.1 mmol, 1.0 equiv.), chiral ligand (e.e. value of ligand was calculated and regulated by mixing the racemic with chiral ligand) and 1,4-diazabicyclo[2.2.2]octane (DABCO) in anhydrous toluene (10 mL, 0.01 M) was added dienophile (0.15 mmol, 1.5 equiv.) under N<sub>2</sub> in quartz tube sealed with rubber plug. Then, titanium (IV) isopropoxide (Ti(Oi-Pr)<sub>4</sub>) was added, after homogeneous mixing, the solution was photolyzed at room temperature in a Rayonet chamber reactor (16 lamps) at λ<sub>max</sub> = 366 nm for 1.5 h. Afterward, the reaction mixture was poured into saturated sodium bicarbonate and stirred over 30 min, the above mixture was extracted three times with ethyl acetate, the combined organic phases were washed twice with brine and dried over anhydrous sodium sulfate. The dried solution was filtered and the filtrate was concentrated under vacuum. The crude product was purified by PTLC to give the corresponding product for e.e. value test.

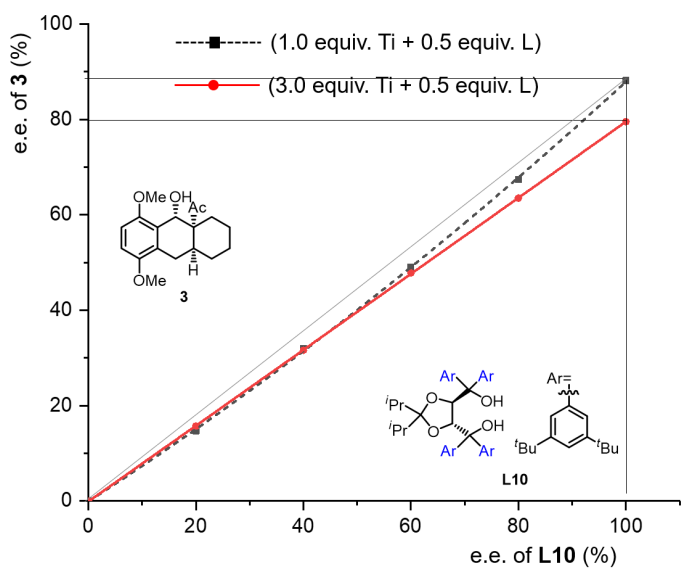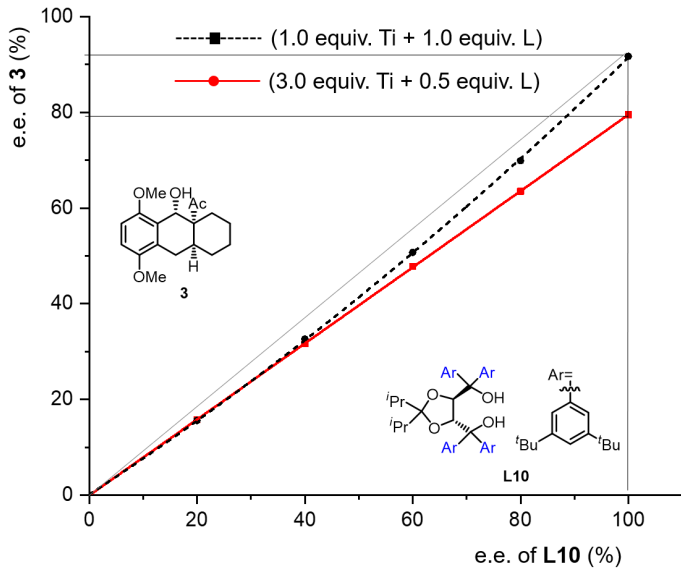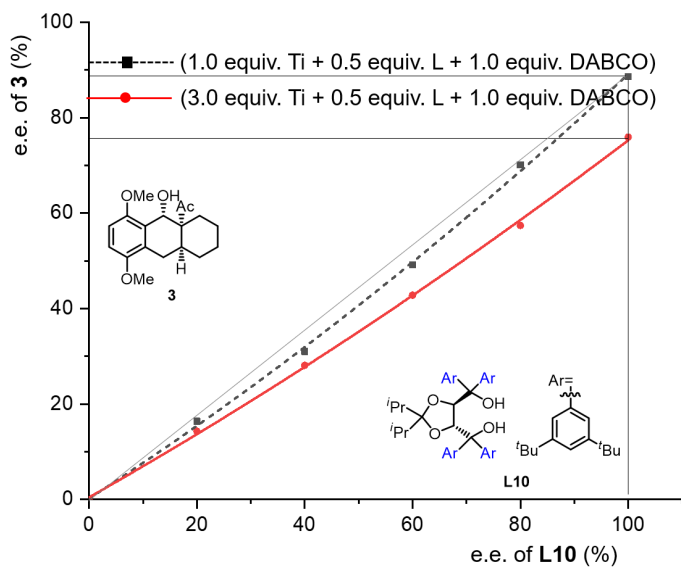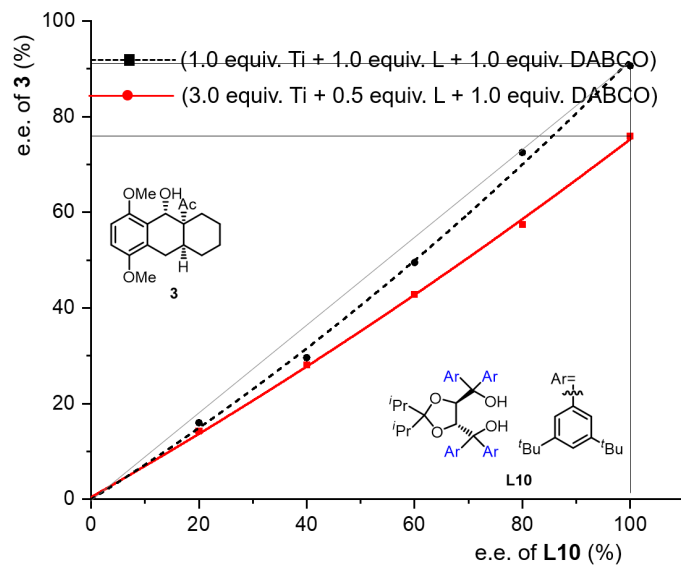

**Figure S3.** Nonlinear effect of the product **3**

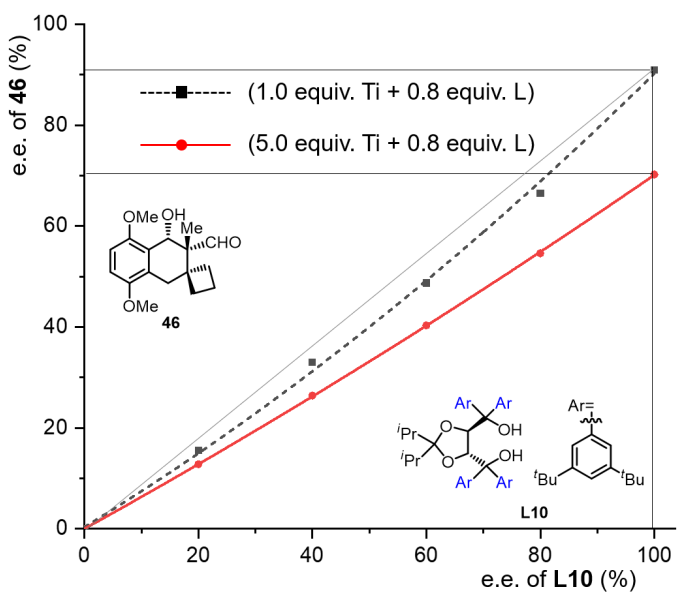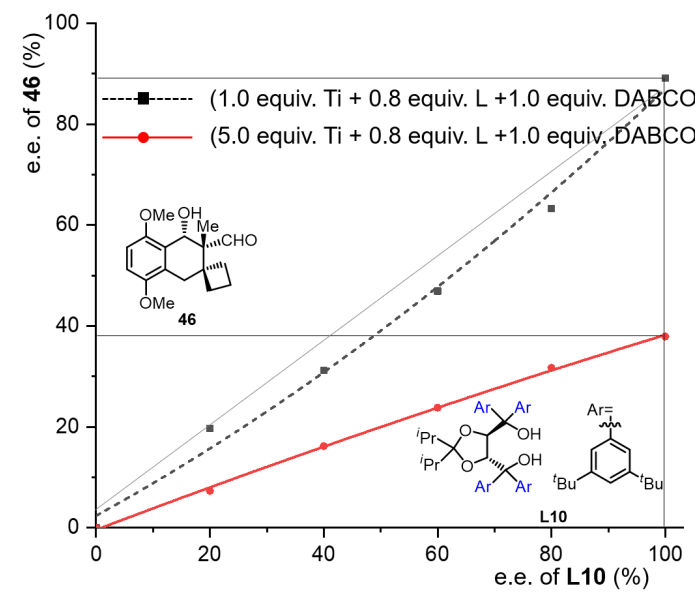

**Figure S4.** Nonlinear effect of the product **46**

## V. Preparation of TADDOL-type chiral ligands

### Synthetic pathways for preparing the ketal

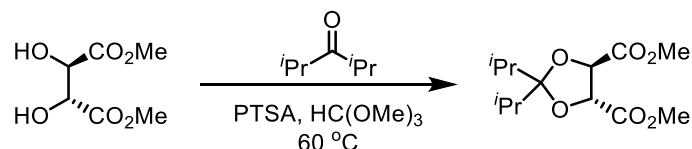

**Ketal.** To a 500 mL round bottom flask was added *p*-toluenesulfonic acid (PTSA, 2 g, 10.5 mmol) and trimethyl orthoformate (60 ml, 550 mmol) into a solution of dimethyl (2*R*,3*R*)-tartrate (38 g, 213 mmol) in 2,4-dimethyl-3-pentanone (180 mL, 1.27 mol). The resulting mixture was heated to 60 °C. After stirring for 24 h at the same temperature, the reaction mixture was cooling to room temperature, then neutralized with 1 N sodium bicarbonate solution and extracted three times with ethyl acetate. The combined organic extract was washed with brine and dried over anhydrous sodium sulfate, and the solvent was removed in vacuo and the residue was purified by silica-gel chromatography (0 - 30% ethyl acetate – petroleum ether) to afford the desired ketal in 88% yield as a yellow oil:  $R_f = 0.55$  (20% ethyl acetate – petroleum ether);  $[\alpha]_D^{20} -21.1$  (c 0.136, DCM);  $^1\text{H NMR}$  (500 MHz,  $\text{CDCl}_3$ )  $\delta$  4.68 (s, 2H), 3.82 (s, 6H), 2.16 (hept,  $J = 6.8$  Hz, 2H), 0.97 (d,  $J = 5.5$  Hz, 6H), 0.96 (d,  $J = 5.5$  Hz, 6H) ppm;  $^{13}\text{C NMR}$  (125 MHz,  $\text{CDCl}_3$ )  $\delta$  169.0 (2C), 121.4, 78.5 (2C), 52.7 (2C), 34.2 (2C), 17.2 (2C), 17.1 (2C) ppm; IR  $\nu_{\text{max}}$  3057, 1606, 1597, 1465, 1151, 1112, 1068, 1031, 866, 740  $\text{cm}^{-1}$ ; HRMS–ESI ( $m/z$ ):  $[\text{M}+\text{H}]^+$  calcd for  $\text{C}_{13}\text{H}_{23}\text{O}_6$ , 275.1489; found, 275.1478.

### Synthetic pathways for preparing the TADDOL-type ligands

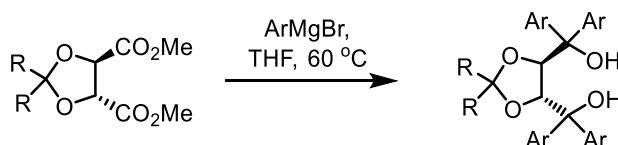

**General procedure: preparation of TADDOL-type ligands.** To a solution of the corresponding ketal (1.0 equiv.) in anhydrous tetrahydrofuran (0.2 M), was slowly added the corresponding Grignard reagent (1.0 M, 4.5 equiv.). The resulting mixture was heated to 60 °C and stirred for 4 h. Thereafter, the reaction was slowly quenched with saturated ammonium chloride solution and extracted twice with ethyl acetate. The combined organic extracts was washed twice with brine, and then dried over anhydrous sodium sulfate. The solvent was removed in vacuo and the residue purified by silica-gel chromatography (0 - 10% ethyl acetate – petroleum ether) to afford the desired chiral TADDOL-type ligands.

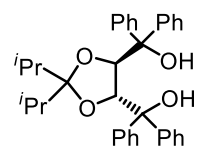

**L3**

**L3** (2.0 g, 85% yield) was prepared according to general procedure to afford the title compound as a white solid:  $R_f = 0.8$  (10% ethyl acetate-petroleum ether); m.p. 134 – 136 °C;  $[\alpha]_D^{20} -30.5$  (c 1.16, DCM);  $^1\text{H NMR}$  (500 MHz,  $\text{CDCl}_3$ )  $\delta$  7.49 – 7.42 (m, 8H), 7.32 – 7.26 (m, 12H), 4.77 (s, 2H), 4.38 (s, 2H), 1.69 (hept,  $J = 6.9$  Hz, 2H), 0.79 (d,  $J = 6.9$  Hz, 6H), 0.59 (d,  $J = 6.9$  Hz, 6H) ppm;  $^{13}\text{C NMR}$  (125 MHz,  $\text{CDCl}_3$ )  $\delta$  146.5 (2C), 142.4 (2C), 129.0 (4C), 128.1 (4C), 127.7 (4C), 127.5 (2C), 127.2 (2C), 127.1 (4C), 114.1, 80.2 (2C), 78.7 (2C), 34.2 (2C), 18.3 (2C), 17.5 (2C) ppm; IR  $\nu_{\text{max}}$  1421, 1267, 896, 742, 705  $\text{cm}^{-1}$ ; HRMS–ESI ( $m/z$ ):  $[\text{M}+\text{Na}]^+$  calcd for  $\text{C}_{35}\text{H}_{38}\text{O}_4\text{Na}$ , 545.2662; found, 545.2662.

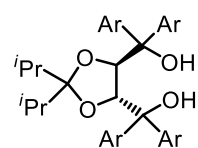

**L5**

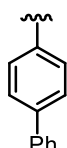

**L5** (2.8 g, 81% yield) was prepared according to general procedure to afford the title compound as a white solid:  $R_f = 0.8$  (10% ethyl acetate-petroleum ether); m.p. 161 – 163 °C;  $[\alpha]_D^{20} -80.6$  (c 0.68, DCM);  $^1\text{H NMR}$  (500 MHz,  $\text{CDCl}_3$ )  $\delta$  7.66 – 7.55 (m, 24H), 7.44 (dt,  $J = 14.7, 7.6$  Hz, 8H), 7.38 – 7.32 (m, 4H), 5.18 – 5.06 (m, 2H), 4.52 (d,  $J = 1.2$  Hz, 2H), 1.80 (hept,  $J = 6.9$  Hz, 2H), 0.86 (d,  $J = 6.9$  Hz, 6H), 0.67 (d,  $J = 6.9$  Hz, 6H) ppm;  $^{13}\text{C NMR}$  (125 MHz,  $\text{CDCl}_3$ )  $\delta$  145.3 (2C), 141.4 (2C), 140.7 (2C), 140.6 (2C), 140.3 (2C), 139.9 (2C), 129.5 (4C), 128.8 (4C), 128.7 (4C), 128.1 (4C), 127.29 (4C), 127.26 (4C), 127.0

(4C), 126.8 (4C), 125.8 (4C), 114.3, 80.3 (2C), 78.6 (2C), 34.3 (2C), 18.4 (2C), 17.6 (2C) ppm; IR  $\nu_{\max}$  3055, 1421, 1267, 896, 744, 705  $\text{cm}^{-1}$ ; HRMS-ESI ( $m/z$ ):  $[\text{M}+\text{Na}]^+$  calcd for  $\text{C}_{59}\text{H}_{54}\text{O}_4\text{Na}$ , 849.3914; found, 849.3915.

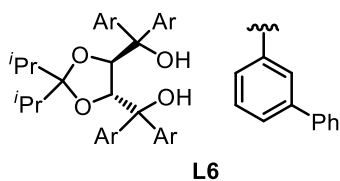

**L6**

**L6** (1.8 g, 72% yield) was prepared according to general procedure to afford the title compound as a white solid:  $R_f = 0.8$  (10% ethyl acetate-petroleum ether); m.p. 106 – 108 °C;  $[\alpha]_{\text{D}}^{20} -38.1$  (c 0.72, DCM);  $^1\text{H NMR}$  (500 MHz,  $\text{CDCl}_3$ )  $\delta$  7.82 (dt,  $J = 5.9, 1.9$  Hz, 4H), 7.58 – 7.50 (m, 16H), 7.42 – 7.35 (m, 12H), 7.33 – 7.27 (m, 4H), 4.85 – 4.79 (m, 2H), 4.62 (s, 2H), 1.74 (hept,  $J = 6.9$

Hz, 2H), 0.73 (d,  $J = 6.9$  Hz, 6H), 0.58 (d,  $J = 6.9$  Hz, 6H) ppm;  $^{13}\text{C NMR}$  (125 MHz,  $\text{CDCl}_3$ )  $\delta$  146.9 (2C), 142.9 (2C), 141.2 (2C), 141.2 (2C), 141.0 (2C), 140.1 (2C), 128.7 (4C), 128.7 (4C), 128.6 (2C), 128.1 (2C), 127.7 (2C), 127.7 (2C), 127.2 (6C), 127.2 (4C), 127.1 (2C), 126.7 (2C), 126.5 (2C), 126.4 (2C), 126.2 (2C), 114.4, 80.7 (2C), 78.9 (2C), 34.4 (2C), 18.2 (2C), 17.5 (2C) ppm; IR  $\nu_{\max}$  3055, 1421, 1267, 896, 744, 705  $\text{cm}^{-1}$ ; HRMS-ESI ( $m/z$ ):  $[\text{M}+\text{Na}]^+$  calcd for  $\text{C}_{59}\text{H}_{54}\text{O}_4\text{Na}$ , 849.3914; found, 849.3900.

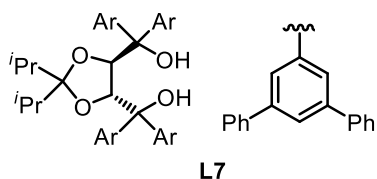

**L7**

**L7** (2.0 g, 76% yield) was prepared according to general procedure to afford the title compound as a white solid:  $R_f = 0.7$  (10% ethyl acetate-petroleum ether); m.p. 158 – 160 °C;  $[\alpha]_{\text{D}}^{20} -59.0$  (c 0.48, DCM);  $^1\text{H NMR}$  (500 MHz,  $\text{CDCl}_3$ )  $\delta$  7.89 (dd,  $J = 8.8, 1.7$  Hz, 8H), 7.76 – 7.71 (m, 4H), 7.60 – 7.56 (m, 8H), 7.54 (d,  $J = 7.5$  Hz, 8H), 7.40 – 7.28 (m, 24H), 5.07 (s,

2H), 4.87 (d,  $J = 2.1$  Hz, 2H), 1.78 (hept,  $J = 6.9$  Hz, 2H), 0.69 (d,  $J = 6.9$  Hz, 6H), 0.56 (d,  $J = 6.9$  Hz, 6H) ppm;  $^{13}\text{C NMR}$  (125 MHz,  $\text{CDCl}_3$ )  $\delta$  147.3 (2C), 143.5 (2C), 141.6 (4C), 141.09 (4C), 141.07 (4C), 140.8 (4C), 128.68 (8C), 128.65 (8C), 127.32 (4C), 127.27 (8C), 127.25 (8C), 126.8 (4C), 125.6 (4C), 125.5 (4C), 125.4 (4C), 114.7, 81.2 (2C), 79.1 (2C), 34.5 (2C), 18.1 (2C), 17.5 (2C) ppm; IR  $\nu_{\max}$  3055, 1479, 1419, 1265, 744, 705  $\text{cm}^{-1}$ .

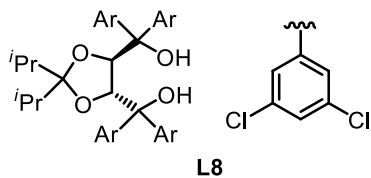

**L8**

**L8** (1.8 g, 72% yield) was prepared according to general procedure to afford the title compound as a yellow solid:  $R_f = 0.65$  (10% ethyl acetate-petroleum ether); m.p. 122 – 124 °C;  $[\alpha]_{\text{D}}^{20} -87.0$  (c 0.92, DCM);  $^1\text{H NMR}$  (500 MHz,  $\text{CDCl}_3$ )  $\delta$  7.35 (s, 6H), 7.29 (d,  $J = 1.9$  Hz, 2H), 7.26 (s, 2H), 7.20 (d,  $J = 1.9$  Hz, 2H), 5.69 (s, 1H), 4.17 (s, 2H), 1.85 (hept,  $J = 6.9$  Hz,

2H), 0.97 (d,  $J = 6.9$  Hz, 6H), 0.81 (d,  $J = 6.9$  Hz, 6H) ppm;  $^{13}\text{C NMR}$  (125 MHz,  $\text{CDCl}_3$ )  $\delta$  147.0 (2C), 144.5 (2C), 135.0 (4C), 134.7 (4C), 128.4 (2C), 128.3 (4C), 126.5 (2C), 125.6 (4C), 115.7, 80.5 (2C), 77.5 (2C), 34.4 (2C), 18.4 (2C), 17.8 (2C) ppm; IR  $\nu_{\max}$  3055, 1419, 1265, 896, 802, 742, 705  $\text{cm}^{-1}$ .

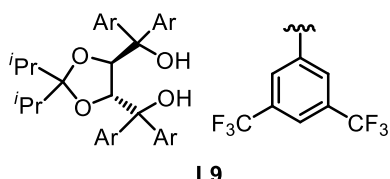

**L9**

**L9** (5.2 g, 84% yield) was prepared according to general procedure to afford the title compound as a white solid:  $R_f = 0.8$  (10% ethyl acetate-petroleum ether); m.p. 136 – 138 °C;  $[\alpha]_{\text{D}}^{20} -15.3$  (c 3.2, DCM);  $^1\text{H NMR}$  (400 MHz,  $\text{CDCl}_3$ )  $\delta$  8.04 (s, 4H), 7.96 (s, 4H), 7.92 (s, 2H), 7.86 (s, 2H), 5.68 (s, 2H), 4.23 (s, 2H), 1.80 (hept,  $J = 6.9$  Hz, 2H), 0.82 (d,  $J = 6.9$  Hz,

6H), 0.66 (d,  $J = 6.9$  Hz, 6H) ppm;  $^{13}\text{C NMR}$  (100 MHz,  $\text{CDCl}_3$ )  $\delta$  146.1 (2C), 143.3 (2C), 132.2 (q,  $J = 33.6$  Hz, 4C), 131.7 (q,  $J = 33.6$  Hz, 4C), 128.3 (q,  $J = 3.9$  Hz, 4C), 127.4 (q,  $J = 3.9$  Hz, 4C), 125.7 (dd,  $J = 272.9, 8.3$  Hz, 2C), 122.7 (m, 8C), 120.3 (dd,  $J = 272.9, 8.3$  Hz, 2C), 115.9, 80.7 (2C), 77.3 (2C), 34.5 (2C), 17.7 (2C), 17.0 (2C) ppm; IR  $\nu_{\max}$  1471, 1373, 1280, 1180, 1139, 900, 744, 707  $\text{cm}^{-1}$ .

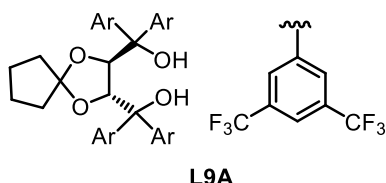

**L9A**

**L9A** (2.6 g, 86% yield) was prepared according to general procedure to afford the title compound as a white solid:  $R_f = 0.8$  (10% ethyl acetate-petroleum ether); m.p. 90 – 92 °C;  $[\alpha]_{\text{D}}^{20} -17.8$  (c 1.4, DCM);  $^1\text{H NMR}$  (500 MHz,  $\text{CDCl}_3$ )  $\delta$  8.08 (s, 4H), 7.95 (s, 2H), 7.87 (s, 4H), 7.85 (s, 2H), 4.79 – 4.73 (m, 2H), 4.35 (s, 2H), 1.71 – 1.62 (m, 2H), 1.62 – 1.44 (m, 6H)

ppm;  $^{13}\text{C NMR}$  (125 MHz,  $\text{CDCl}_3$ )  $\delta$  145.8 (2C), 143.5 (2C), 132.2 (q,  $J = 33.6$  Hz, 4C), 131.8 (q,  $J = 33.6$  Hz, 4C), 128.1 (q,  $J = 3.6$  Hz, 4C), 127.5 (q,  $J = 3.8$  Hz, 4C), 125.2 (dd,  $J = 272.8, 20.7$  Hz, 2C), 122.7 (m, 8C),

120.9 (dd,  $J = 272.8, 20.7$  Hz, 2C), 120.8, 81.1 (2C), 77.1 (2C), 36.7 (2C), 22.4 (2C) ppm; IR  $\nu_{\max}$  1371, 1280, 1267, 1178, 1141, 900, 742, 705, 682  $\text{cm}^{-1}$ .

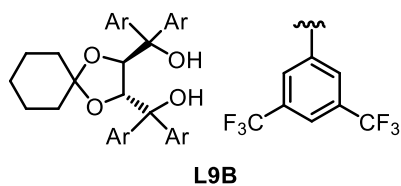

**L9B** (2.2 g, 85% yield) was prepared according to general procedure to afford the title compound as a white solid:  $R_f = 0.8$  (10% ethyl acetate-petroleum ether); m.p. 74 – 76 °C;  $[\alpha]_D^{20} -26.1$  (c 8.0, DCM);  $^1\text{H NMR}$  (500 MHz,  $\text{CDCl}_3$ )  $\delta$  8.14 (s, 4H), 7.95 (s, 2H), 7.94 (s, 4H), 7.85 (s, 2H), 5.30 (s, 2H), 4.25 (s, 2H), 1.62 – 1.48 (m, 4H), 1.44 – 1.36 (m, 4H), 1.35 – 1.28 (m, 2H) ppm;  $^{13}\text{C NMR}$  (125 MHz,  $\text{CDCl}_3$ )  $\delta$  146.0 (2C), 143.4 (2C), 132.2 (q,  $J =$

33.5 Hz, 4C), 131.7 (q,  $J = 33.5$  Hz, 4C), 128.2 (q,  $J = 3.8$  Hz, 4C), 127.6 (q,  $J = 3.9$  Hz, 4C), 125.3 (dd,  $J = 272.7, 19.1$  Hz, 2C), 122.7 (m, 8C), 121.0 (dd,  $J = 272.6, 19.1$  Hz, 2C), 111.6, 80.9 (2C), 76.9 (2C), 36.3 (2C), 24.6, 23.7 (2C) ppm; IR  $\nu_{\max}$  3751, 1373, 1280, 1178, 1139, 902, 844, 744, 682  $\text{cm}^{-1}$ .

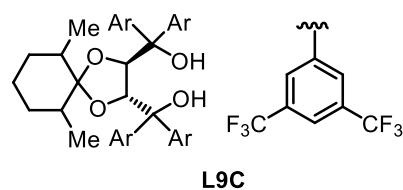

**L9C** (2.0 g, 76% yield) was prepared according to general procedure to afford the title compound as a white solid:  $R_f = 0.8$  (10% ethyl acetate-petroleum ether); m.p. 90 – 92 °C;  $[\alpha]_D^{20} -30.0$  (c 5.4, DCM);  $^1\text{H NMR}$  (500 MHz,  $\text{CDCl}_3$ )  $\delta$  8.10 (s, 2H), 8.05 (s, 2H), 7.96 (s, 2H), 7.94 (s, 4H), 7.87 (s, 2H), 5.07 (s, 2H), 4.29 (s, 1H), 4.25 (s, 1H), 1.81 – 1.71 (m, 1H), 1.68 – 1.55 (m, 3H), 1.50 – 1.35 (m, 3H), 1.34 – 1.23 (m, 1H), 0.68 (d,  $J = 6.5$  Hz, 3H),

0.59 (s, 3H) ppm;  $^{13}\text{C NMR}$  (125 MHz,  $\text{CDCl}_3$ )  $\delta$  146.1 (2C), 143.3 (2C), 132.3 (q,  $J = 33.5$  Hz, 4C), 131.8 (q,  $J = 33.5$  Hz, 4C), 128.2 (q,  $J = 3.8$  Hz, 4C), 127.4 (q,  $J = 3.9$  Hz, 4C), 124.7 (dd,  $J = 272.7, 19.1$  Hz, 2C), 122.7 (m, 8C), 121.5 (dd,  $J = 272.6, 19.1$  Hz, 2C), 114.5, 80.7 (2C), 77.5 (2C), 35.4, 31.2 (2C), 19.3 (2C), 14.3 (2C) ppm; IR  $\nu_{\max}$  1373, 1280, 1267, 1178, 900, 844, 744, 707, 682  $\text{cm}^{-1}$ .

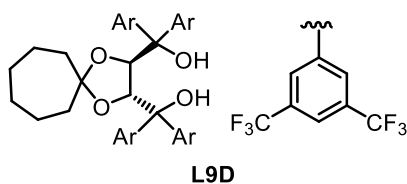

**L9D** (2.2 g, 78% yield) was prepared according to general procedure to afford the title compound as a white solid:  $R_f = 0.8$  (10% ethyl acetate-petroleum ether); m.p. 70 – 72 °C;  $[\alpha]_D^{20} -15.1$  (c 2.2, DCM);  $^1\text{H NMR}$  (500 MHz,  $\text{CDCl}_3$ )  $\delta$  8.11 (s, 4H), 7.93 (s, 2H), 7.86 (s, 4H), 7.83 (s, 2H), 5.10 – 5.02 (m, 2H), 4.09 (s, 2H), 1.66 – 1.56 (m, 4H), 1.53 – 1.47 (m, 4H), 1.47 – 1.35 (m, 4H) ppm;  $^{13}\text{C NMR}$  (125 MHz,  $\text{CDCl}_3$ )  $\delta$  145.6 (2C), 143.3 (2C),

132.1 (q,  $J = 33.5$  Hz, 4C), 131.6 (q,  $J = 33.5$  Hz, 4C), 128.0 (q,  $J = 3.8$  Hz, 4C), 127.5 (q,  $J = 3.9$  Hz, 4C), 125.2 (dd,  $J = 272.7, 19.1$  Hz, 2C), 122.7 (m, 8C), 120.9 (dd,  $J = 272.6, 19.1$  Hz, 2C), 114.6, 80.6 (2C), 76.7 (2C), 39.5 (2C), 28.1 (2C), 21.4 (2C) ppm; IR  $\nu_{\max}$  1373, 1282, 1267, 1180, 1141, 900, 744, 707  $\text{cm}^{-1}$ .

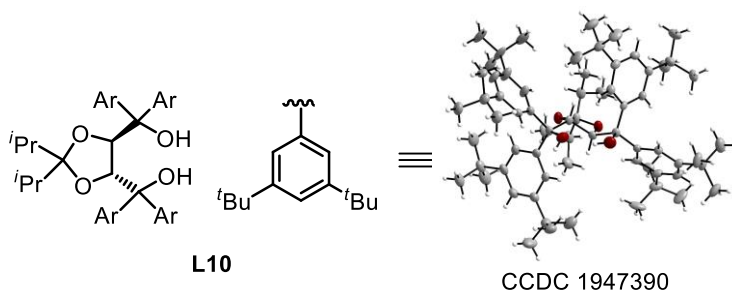

**L10** (8.0 g, 82% yield) was prepared according to general procedure to afford the title compound as a white solid:  $R_f = 0.8$  (10% ethyl acetate-petroleum ether); m.p. 160 – 162 °C;  $[\alpha]_D^{20} -20.0$  (c 1.48, DCM); and it was recrystallized from ethyl acetate /hexane (V/V = 1/4) at 25 °C, to obtain colorless crystals, CCDC (1947390).  $^1\text{H NMR}$  (500 MHz,  $\text{CDCl}_3$ )  $\delta$  7.43 (s, 4H), 7.33 – 7.29 (m, 6H), 7.27 (d,  $J = 1.8$

Hz, 2H), 4.65 (s, 2H), 4.57 (s, 2H), 1.77 (hept,  $J = 6.9$  Hz, 2H), 1.29 – 1.27 (m, 36H), 1.25 – 1.23 (m, 36H), 0.59 (d,  $J = 6.9$  Hz, 6H), 0.41 (d,  $J = 6.9$  Hz, 6H) ppm;  $^{13}\text{C NMR}$  (125 MHz,  $\text{CDCl}_3$ )  $\delta$  149.6 (4C), 148.8 (4C), 145.9 (2C), 142.1 (2C), 123.7 (4C), 122.0 (4C), 120.73 (2C), 120.69 (2C), 113.5, 81.3 (2C), 79.6 (2C), 35.0 (4C), 34.9 (4C), 34.8 (12C), 31.54 (12C), 31.49 (2C), 18.0 (2C), 17.2 (2C) ppm; IR  $\nu_{\max}$  1280, 1267, 1180, 1141, 898, 742, 705, 682  $\text{cm}^{-1}$ ; HRMS–ESI ( $m/z$ ):  $[\text{M}+\text{Na}]^+$  calcd for  $\text{C}_{67}\text{H}_{102}\text{O}_4\text{Na}$ , 993.7670; found, 993.7662.

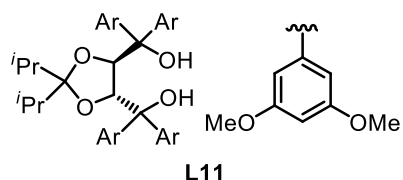

**L11** (1.6 g, 75% yield) was prepared according to general procedure to afford the title compound as a white solid:  $R_f = 0.5$  (10% ethyl acetate-petroleum ether); m.p. 160 – 162 °C;  $[\alpha]_D^{20} -45.5$  (c 0.4, DCM);  $^1\text{H NMR}$  (500 MHz,  $\text{CDCl}_3$ )  $\delta$  6.68 (d,  $J = 2.3$  Hz, 4H), 6.65 (d,  $J = 2.3$  Hz, 4H), 6.35 (t,  $J = 2.3$  Hz, 2H), 6.31 (t,  $J = 2.3$  Hz, 2H), 5.06 – 4.98 (m, 2H), 4.41 (s, 2H), 3.69 (s, 12H), 3.67 (s, 12H), 1.79 (hept,  $J = 7.0$  Hz, 2H), 0.83 (d,  $J = 7.0$  Hz, 6H), 0.68 (d,  $J = 7.0$  Hz, 6H) ppm;  $^{13}\text{C NMR}$  (125 MHz,  $\text{CDCl}_3$ )  $\delta$  160.2 (4C), 159.6 (4C), 148.2 (2C), 144.7 (2C), 113.9, 107.5 (4C), 105.8 (4C), 99.5 (2C), 99.1 (2C), 80.7 (2C), 78.6 (2C), 55.3 (4C), 55.2 (4C), 34.3 (2C), 18.3 (2C), 17.6 (2C) ppm; IR  $\nu_{\text{max}}$  1598, 1421, 1280, 1267, 1180, 1141, 898, 744, 705, 682  $\text{cm}^{-1}$ ; HRMS–ESI ( $m/z$ ):  $[\text{M}+\text{Na}]^+$  calcd for  $\text{C}_{43}\text{H}_{54}\text{O}_{12}\text{Na}$ , 785.3507; found, 785.3502.

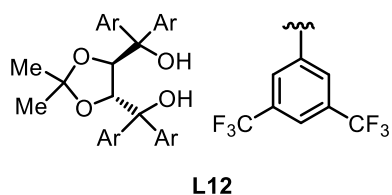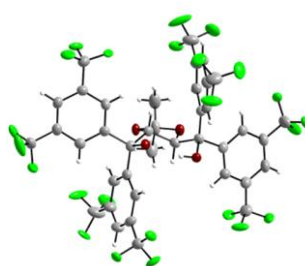

**L12** was recrystallized from ethyl acetate /hexane (V/V = 1/4) at 25 °C, to obtain colorless crystals, CCDC (1947392).

Known compound:

D.-C. A. Falk, B. S. A.-L. Göderz, H.-G. Schmalz, *Angew. Chem. Int. Ed.* 2013, **52**, 1576–1580.

## VI. General Procedures for Asymmetric Photoenolization/Diels–Alder Reaction (APEDA)

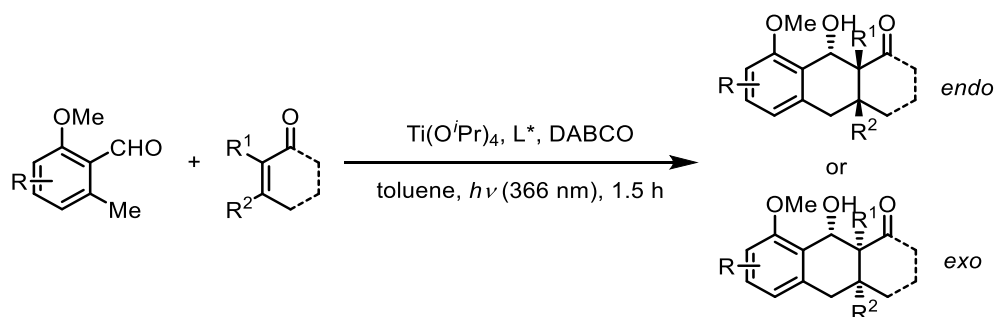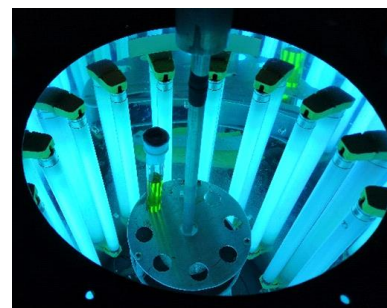

To a solution of aromatic aldehyde (0.3 mmol, 1.0 equiv.), chiral ligand (0.15 mmol, 0.5 equiv.) and 1,4-diazabicyclo[2.2.2]octane (DABCO) (0.3 mmol, 1.0 equiv.) in anhydrous toluene (30 mL, 0.01 M) was added dienophile (0.45 mmol, 1.5 equiv.) (if the dienophile was solid, it was added before the addition of solvent) under  $\text{N}_2$ , in quartz tube sealed with rubber plug. Then, titanium (IV) isopropoxide ( $\text{Ti}(\text{O}i\text{-Pr})_4$ , 0.3 mmol, 1.0 equiv.) was added, after homogeneous mixing, the solution was photolyzed at room temperature in a Rayonet chamber reactor (16 lamps) at  $\lambda_{\text{max}} = 366$  nm for 1.5 h. Then the reaction mixture was poured into saturated sodium bicarbonate and stirred over 30 min, the above mixture was extracted three times with ethyl acetate, the combined organic phases were washed twice with brine and dried over anhydrous sodium sulfate. The dried solution was filtered and the filtrate was concentrated under vacuum. The residue was purified by silica gel column chromatography to give the corresponding cycloadducts, and the ligand could be recovered over 95% yield.

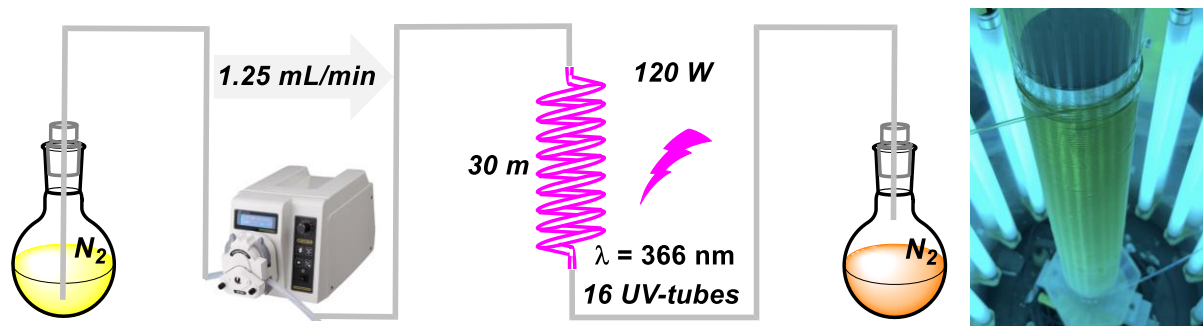

**General Procedure for flow APEDA reaction:** In a round-bottom flask, the aromatic aldehyde (6.0 mmol, 1.0 equiv.) and chiral ligand (3.0 mmol, 0.5 equiv.) was dissolved in anhydrous toluene (300 mL, 0.02 M) and followed by addition of titanium tetraisopropanolate (6.0 mmol, 1.0 equiv.) and dienophile (9.0 mmol, 1.5 equiv.) under nitrogen. The round-bottom flask was connected to double-ended needle and the other end of the double-ended needle was connected to the silicone tubing (1.0 mm ID, 3.0 mm OD) which was connected to peristaltic pump. The peristaltic pump was connected to FEP (fluorinated ethylene propylene) tubing (0.8 mm ID, 1.6 mm OD, 30.0 m length) wrapped around a cylinder placed in a Rayonet chamber hosting 16 UV lamps which allowed the flowing solution receive the highest photon flux. The reaction mixture was pumped through the FEP tubing wrapped around a cylinder placed in a Rayonet chamber (16 lamps) at 366 nm and collected in a round-bottom flask. The flow rate is 1.25 ml/min. When all of the reaction mixture had been pumped in to the tubing, anhydrous toluene was pumped through the tubing at the same flow rate until all solution containing the reaction mixture was collected. The reaction mixture was poured into sat. sodium bicarbonate and stirred over 30 mins, the above mixture was extracted with ethyl acetate, washed with brine and dried over anhydrous sodium sulfate, filtered, concentrated, and purified by silica gel column chromatography (10% ethyl acetate in petroleum ether), and the ligand could be recovered over 95% yield.

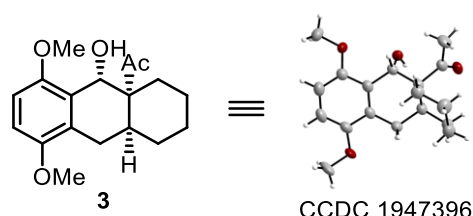

**3** (75 mg) was prepared according to general procedure in 82% yield. The reaction time was 90 min under 366 nm light. The product was isolated through silica gel column chromatography (6% to 20% ethyl acetate-petroleum ether) as a white solid:  $R_f = 0.12$  (20% ethyl acetate-petroleum ether); m.p. 114 – 116 °C;  $[\alpha]_D^{20} +35.8$  (c 0.84, DCM); and it was recrystallized from ethyl acetate/hexane (V/V = 1/4) at 25 °C, to obtain colorless crystals, CCDC (1947396).  $^1\text{H NMR}$  (400 MHz,  $\text{CDCl}_3$ )  $\delta$  6.72 (d,  $J = 8.8$  Hz, 1H), 6.68 (d,  $J = 8.8$  Hz, 1H), 4.90 (s, 1H), 3.82 (s, 3H), 3.80 (s, 3H), 2.79 (dd,  $J = 17.3, 6.1$  Hz, 1H), 2.73 – 2.64 (m, 1H), 2.60 (dd,  $J = 17.2, 10.7$  Hz, 1H), 2.31 (s, 3H), 2.20 (s, 1H), 2.05 – 1.91 (m, 1H), 1.80 (ddt,  $J = 13.4, 3.6, 1.9$  Hz, 1H), 1.61 – 1.44 (m, 4H), 1.25 (td,  $J = 13.5, 3.0$  Hz, 1H), 1.13 (tt,  $J = 12.9, 2.9$  Hz, 1H) ppm;  $^{13}\text{C NMR}$  (100 MHz,  $\text{CDCl}_3$ )  $\delta$  211.3, 151.6, 151.1, 125.9, 125.7, 108.8, 107.1, 68.4, 55.6 (t,  $J = 3.4$  Hz, 2C), 54.2, 27.1, 26.6, 26.3 (d,  $J = 2.5$  Hz, 1C), 26.2, 24.7, 22.7, 20.1 ppm; IR  $\nu_{\text{max}}$  1720, 1481, 1259, 1087, 742  $\text{cm}^{-1}$ ; HRMS–ESI ( $m/z$ ):  $[\text{M}+\text{Na}]^+$  calcd for  $\text{C}_{18}\text{H}_{24}\text{O}_4\text{Na}$ , 327.1567; found, 327.1563; Enantiomeric excess: 92%, determined by HPLC (Daicel Chiralpak IG, hexane/isopropanol = 70/30, flow rate 0.8 mL/min, T = 25 °C, 240 nm):  $t_R = 14.419$  min (major),  $t_R = 18.018$  min (minor).

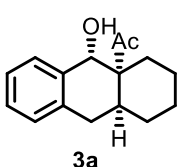

**3a** (35.2 mg) was prepared according to general procedure A from in 48% yield. The reaction time was 90 min under 366 nm light. The product was isolated through silica gel column chromatography (6% to 20% ethyl acetate-petroleum ether) as a yellow oil:  $R_f = 0.30$  (20% ethyl acetate-petroleum ether);  $[\alpha]_D^{20} +10.0$  (c 0.40, DCM);  $^1\text{H NMR}$  (500 MHz,  $\text{CDCl}_3$ )  $\delta$  7.62 (d,  $J = 7.6$  Hz, 1H), 7.22 (t,  $J = 7.4$  Hz, 1H), 7.17 (t,  $J = 7.4$  Hz, 1H), 7.03 (d,  $J = 7.5$  Hz, 1H), 4.84 (d,  $J = 8.2$  Hz, 1H), 3.22 – 3.10 (m, 1H), 2.90 (dd,  $J = 17.7, 6.6$  Hz, 1H), 2.62 (dd,  $J = 17.7, 4.2$  Hz, 1H), 2.54 – 2.43 (m, 1H), 2.23 (s, 3H), 2.09 – 1.97 (m, 1H), 1.82 – 1.73 (m, 1H), 1.73 – 1.33 (m, 5H) ppm;  $^{13}\text{C NMR}$  (125

MHz, CDCl<sub>3</sub>)  $\delta$  214.7, 138.0, 133.4, 128.6, 127.3, 127.1, 126.4, 69.4, 55.3, 34.5, 32.5, 28.6, 27.4, 24.8, 24.2, 21.0 ppm; IR  $\nu_{\max}$  1267, 896, 744, 705, 507 cm<sup>-1</sup>; HRMS-ESI ( $m/z$ ): [M+Na]<sup>+</sup> calcd for C<sub>16</sub>H<sub>20</sub>O<sub>2</sub>Na, 267.1356; found, 267.1351; Enantiomeric excess: 22%, determined by HPLC (Daicel Chiralpak IG, hexane/isopropanol = 95/5, flow rate 0.8 mL/min, T = 25 °C, 230 nm):  $t_R$  = 34.327min (major),  $t_R$  = 37.110 min (minor).

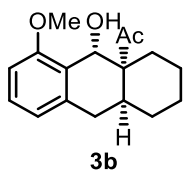

**3b** (65 mg) was prepared according to general procedure in 79% yield. The reaction time was 90 min under 366 nm light. The product was isolated through silica gel column chromatography (6% to 20% ethyl acetate-petroleum ether) as a white solid:  $R_f$  = 0.1 (20% ethyl acetate-petroleum ether); m.p. 142 – 144 °C;  $[\alpha]_D^{20}$  +24.1 (c 0.20, DCM); <sup>1</sup>H NMR (400 MHz, CDCl<sub>3</sub>)  $\delta$  7.20 (t,  $J$  = 7.9 Hz, 1H), 6.77 (d,  $J$  = 7.7 Hz, 1H), 6.71 (d,  $J$  = 8.1 Hz, 1H), 4.92 (s, 1H), 3.86 (s, 3H), 2.98 – 2.85 (m, 1H), 2.81 – 2.67 (m, 2H), 2.32 (s, 3H), 2.19 (s, 1H), 2.04 – 1.91 (m, 1H), 1.83 (dt,  $J$  = 13.8, 3.4 Hz, 1H), 1.61 – 1.41 (m, 4H), 1.29 (td,  $J$  = 13.5, 3.1 Hz, 1H), 1.21 – 1.06 (m, 1H) ppm; <sup>13</sup>C NMR (125 MHz, CDCl<sub>3</sub>)  $\delta$  211.2, 157.8, 136.9, 128.6, 124.7, 121.2, 107.3, 68.3, 55.4, 54.6, 30.0, 27.1, 26.8, 26.6, 26.3, 22.8, 20.1 ppm; IR  $\nu_{\max}$  2926, 1708, 1591, 1265, 1083, 740 cm<sup>-1</sup>; HRMS-ESI ( $m/z$ ): [M+Na]<sup>+</sup> calcd for C<sub>17</sub>H<sub>22</sub>O<sub>3</sub>Na, 297.1461; found, 297.1459; Enantiomeric excess: 92%, determined by HPLC (Daicel Chiralpak IG, hexane/isopropanol = 70/30, flow rate 0.8 mL/min, T = 25 °C, 230 nm):  $t_R$  = 12.301 min (major),  $t_R$  = 13.581 min (minor).

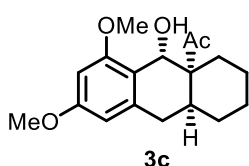

**3c** (72.2 mg) was prepared according to general procedure A from in 92% yield. The reaction time was 90 min under 366 nm light. The product was isolated through silica gel column chromatography (6% to 20% ethyl acetate-petroleum ether) as a yellow oil:  $R_f$  = 0.24 (30% ethyl acetate-petroleum ether);  $[\alpha]_D^{20}$  +17.9 (c 0.47, DCM); <sup>1</sup>H NMR (500 MHz, CDCl<sub>3</sub>)  $\delta$  6.31 (d,  $J$  = 2.3 Hz, 1H), 6.27 (d,  $J$  = 2.3 Hz, 1H), 4.86 (d,  $J$  = 3.7 Hz, 1H), 3.84 (s, 3H), 3.79 (s, 3H), 2.94 – 2.83 (m, 1H), 2.78 – 2.69 (m, 2H), 2.31 (s, 3H), 2.03 – 1.93 (m, 2H), 1.85 – 1.78 (m, 1H), 1.57 – 1.40 (m, 4H), 1.32 – 1.24 (m, 1H), 1.20 – 1.06 (m, 1H) ppm; <sup>13</sup>C NMR (125 MHz, CDCl<sub>3</sub>)  $\delta$  211.3, 160.2, 159.0, 137.9, 117.6, 103.7, 96.4, 68.1, 55.4, 55.3, 54.8, 30.5, 27.1, 26.8, 26.6, 26.2, 22.8, 20.1 ppm; IR  $\nu_{\max}$  3053, 1610, 1456, 1267, 1151, 742 cm<sup>-1</sup>; HRMS-ESI ( $m/z$ ): [M+Na]<sup>+</sup> calcd for C<sub>18</sub>H<sub>24</sub>O<sub>4</sub>Na, 327.1567; found, 327.1563; Enantiomeric excess: 91%, determined by HPLC (Daicel Chiralpak IG, hexane/isopropanol = 70/30, flow rate 0.8 mL/min, T = 25 °C, 230 nm):  $t_R$  = 21.293 min (major),  $t_R$  = 23.830 min (minor).

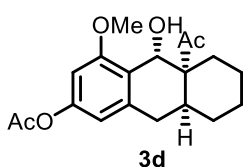

**3d** (84.6 mg) was prepared according to general procedure A from in 85% yield. The reaction time was 90 min under 366 nm light. The product was isolated through silica gel column chromatography (6% to 20% ethyl acetate-petroleum ether) as a yellow oil:  $R_f$  = 0.20 (35% ethyl acetate-petroleum ether);  $[\alpha]_D^{20}$  +2.9 (c 0.96, DCM); <sup>1</sup>H NMR (500 MHz, CDCl<sub>3</sub>)  $\delta$  6.51 (d,  $J$  = 2.3 Hz, 1H), 6.46 (d,  $J$  = 2.1 Hz, 1H), 4.87 (s, 1H), 3.84 (s, 3H), 2.90 (dd,  $J$  = 19.7, 13.1 Hz, 1H), 2.75 (dd,  $J$  = 13.4, 6.3 Hz, 2H), 2.31 (s, 3H), 2.29 (s, 3H), 2.06 (s, 1H), 1.97 (tdd,  $J$  = 13.7, 7.8, 4.1 Hz, 1H), 1.81 (d,  $J$  = 13.9 Hz, 1H), 1.65 – 1.53 (m, 2H), 1.52 – 1.38 (m, 2H), 1.27 (td,  $J$  = 13.8, 3.6 Hz, 1H), 1.18 – 1.05 (m, 1H) ppm; <sup>13</sup>C NMR (125 MHz, CDCl<sub>3</sub>)  $\delta$  211.0, 169.5, 158.6, 150.9, 138.0, 122.4, 113.5, 102.0, 68.0, 55.6, 54.6, 30.2, 27.0, 26.7, 26.5, 26.2, 22.7, 21.2, 20.0 ppm; IR  $\nu_{\max}$  1267, 1211, 1029, 744, 507 cm<sup>-1</sup>; HRMS-ESI ( $m/z$ ): [M+Na]<sup>+</sup> calcd for C<sub>19</sub>H<sub>24</sub>O<sub>5</sub>Na, 355.1516; found, 355.1501; Enantiomeric excess: 81%, determined by HPLC (Daicel Chiralpak IG, hexane/isopropanol = 65/35, flow rate 0.8 mL/min, T = 25 °C, 230 nm):  $t_R$  = 21.296 min (major),  $t_R$  = 23.696 min (minor).

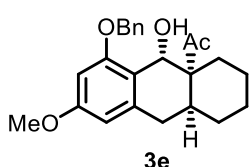

**3e** (83.2 mg) was prepared according to general procedure A from in 73% yield. The reaction time was 90 min under 366 nm light. The product was isolated through silica gel column chromatography (6% to 20% ethyl acetate-petroleum ether) as a yellow oil:  $R_f$  = 0.15 (20% ethyl acetate-petroleum ether);  $[\alpha]_D^{20}$  +8.6 (c 0.96, DCM); <sup>1</sup>H NMR (400 MHz, CDCl<sub>3</sub>)  $\delta$  7.46 – 7.29 (m, 5H), 6.38 (d,  $J$  = 2.3 Hz, 1H), 6.29 (d,  $J$  = 2.3 Hz, 1H), 5.12 (d,  $J$  = 12.0 Hz, 1H), 5.08 (d,  $J$  = 12.0 Hz, 1H), 4.91 (s, 1H), 3.77 (s, 3H), 2.90 (dd,  $J$  = 19.7, 13.4 Hz, 1H), 2.81 – 2.69 (m, 2H), 2.29 (s, 3H), 2.10 (s, 1H), 2.02 – 1.90 (m, 1H), 1.81 (d,  $J$  = 13.9 Hz, 1H), 1.61 – 1.40 (m, 3H), 1.28 (td,  $J$  = 13.5, 3.2 Hz, 1H), 1.19 – 1.08 (m, 1H) ppm; <sup>13</sup>C NMR (100 MHz, CDCl<sub>3</sub>)  $\delta$  211.3, 160.0, 158.0, 138.0, 136.6, 128.7



(2C), 128.1, 127.2 (2C), 118.1, 104.2, 97.9, 70.2, 68.34, 55.25, 54.7, 30.6, 27.01, 27.0, 26.6, 26.4, 22.7, 20.1 ppm; IR  $\nu_{\max}$  1606, 1267, 1151, 1072, 742  $\text{cm}^{-1}$ ; HRMS–ESI ( $m/z$ ):  $[M+Na]^+$  calcd for  $C_{24}H_{28}O_4Na$ , 403.1880; found, 403.1872; Enantiomeric excess: 72%, determined by HPLC (Daicel Chiralpak IG, hexane/isopropanol = 70/30, flow rate 0.8 mL/min, T = 25 °C, 230 nm):  $t_R$  = 31.923 min (major),  $t_R$  = 34.506 min (minor).

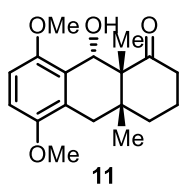

**11** (70.1 mg) was prepared according to general procedure in 77% yield. The reaction time was 90 min under 366 nm light. The product was isolated through silica gel column chromatography (6% to 20% ethyl acetate-petroleum ether) as a white solid:  $R_f$  = 0.31 (20% ethyl acetate-petroleum ether); m.p. 129 - 131 °C;  $[\alpha]_D^{20}$  +59.9 (c 0.5, DCM);  $^1H$  NMR (500 MHz,  $CDCl_3$ )  $\delta$  6.72 (d,  $J$  = 8.9 Hz, 1H), 6.70 (d,  $J$  = 8.9 Hz, 1H), 4.66 (d,  $J$  = 3.9 Hz, 1H), 3.82 (s, 3H), 3.79 (s, 3H), 3.38 (d,  $J$  = 3.9 Hz, 1H), 2.88 – 2.80 (m, 1H), 2.77 (d,  $J$  = 18.2 Hz, 1H), 2.51 – 2.44 (m, 1H), 2.42 – 2.34 (m, 1H), 2.38 (d,  $J$  = 18.1 Hz, 1H), 2.01 – 1.81 (m, 2H), 1.27 (m, 1H), 1.09 (s, 3H), 1.04 (s, 3H) ppm;  $^{13}C$  NMR (125 MHz,  $CDCl_3$ )  $\delta$  216.0, 151.7, 151.1, 126.0, 124.3, 108.6, 107.3, 71.2, 55.6, 55.5, 53.8, 39.4, 36.0, 34.9, 32.4, 24.8, 19.8, 16.9 ppm; IR  $\nu_{\max}$  2987, 1419, 1282, 1267, 1178, 742  $\text{cm}^{-1}$ ; HRMS–EI ( $m/z$ ):  $[M]^+$  calcd for  $C_{18}H_{24}O_4$ , 304.1675; found, 304.1671; Enantiomeric excess: 91%, determined by HPLC (Daicel Chiralpak IG, hexane/isopropanol = 70/30, flow rate 0.8 mL/min, T = 25 °C, 230 nm):  $t_R$  = 8.699 min (major),  $t_R$  = 13.042 min (minor).

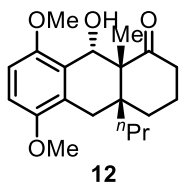

**12** (88.7 mg) was prepared according to general procedure in 89% yield. The reaction time was 90 min under 366 nm light. The product was isolated through silica gel column chromatography (6% to 20% ethyl acetate-petroleum ether) as a yellow solid:  $R_f$  = 0.36 (20% ethyl acetate-petroleum ether); m.p. 133 - 135 °C;  $[\alpha]_D^{20}$  +60.5 (c 0.75, DCM);  $^1H$  NMR (500 MHz,  $CDCl_3$ )  $\delta$  6.72 (d,  $J$  = 8.8 Hz, 1H), 6.69 (d,  $J$  = 8.8 Hz, 1H), 4.66 (d,  $J$  = 3.6 Hz, 1H), 3.81 (s, 3H), 3.79 (s, 3H), 3.31 (d,  $J$  = 3.6 Hz, 1H), 2.94 – 2.84 (m, 1H), 2.92 (d,  $J$  = 18.4 Hz, 1H), 2.51 – 2.44 (m, 1H), 2.41 – 2.34 (m, 1H), 2.29 (d,  $J$  = 18.3 Hz, 1H), 1.85 – 1.73 (m, 2H), 1.45 – 1.28 (m, 5H), 1.04 (s, 3H), 0.93 (t,  $J$  = 7.0 Hz, 3H) ppm;  $^{13}C$  NMR (125 MHz,  $CDCl_3$ )  $\delta$  216.2, 151.6, 151.2, 126.0, 124.1, 108.5, 107.1, 71.4, 55.52, 55.47, 54.5, 39.8, 38.7, 38.0, 32.0, 27.0, 19.4, 16.4, 15.9, 15.0 ppm; IR  $\nu_{\max}$  3055, 1691, 1282, 1178, 742  $\text{cm}^{-1}$ ; HRMS–EI ( $m/z$ ):  $[M]^+$  calcd for  $C_{20}H_{28}O_4$ , 332.1988; found, 332.1986; Enantiomeric excess: 87%, determined by HPLC (Daicel Chiralpak IG, hexane/isopropanol = 70/30, flow rate 0.8 mL/min, T = 25 °C, 230 nm):  $t_R$  = 7.358 min (major),  $t_R$  = 11.298 min (minor).

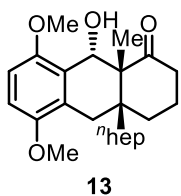

**13** (87 mg) was prepared according to general procedure in 75% yield. The reaction time was 90 min under 366 nm light. The product was isolated through silica gel column chromatography (6% to 20% ethyl acetate-petroleum ether) as a white solid:  $R_f$  = 0.41 (20% ethyl acetate-petroleum ether); m.p. 124 - 126 °C;  $[\alpha]_D^{20}$  +49.9 (c 0.41, DCM);  $^1H$  NMR (500 MHz,  $CDCl_3$ )  $\delta$  6.72 (d,  $J$  = 8.8 Hz, 1H), 6.69 (d,  $J$  = 8.8 Hz, 1H), 4.66 (d,  $J$  = 3.6 Hz, 1H), 3.81 (s, 3H), 3.79 (s, 3H), 3.30 (d,  $J$  = 3.6 Hz, 1H), 2.95 – 2.85 (m, 1H), 2.90 (d,  $J$  = 18.0 Hz, 1H), 2.51 – 2.43 (m, 1H), 2.43 – 2.33 (m, 1H), 2.28 (d,  $J$  = 18.2 Hz, 1H), 1.85 – 1.75 (m, 2H), 1.44 – 1.38 (m, 1H), 1.34 – 1.22 (m, 12H), 1.04 (s, 3H), 0.89 (t,  $J$  = 6.9 Hz, 3H) ppm;  $^{13}C$  NMR (125 MHz,  $CDCl_3$ )  $\delta$  216.2, 151.6, 151.2, 126.0, 124.2, 108.5, 107.1, 71.5, 55.53, 55.47, 54.5, 39.8, 37.9, 36.3, 32.0, 31.9, 30.5, 29.3, 26.9, 22.6 (2C), 19.4, 16.4, 14.1 ppm; IR  $\nu_{\max}$  3053, 2322, 0697, 1282, 1267, 1178, 742  $\text{cm}^{-1}$ ; HRMS–ESI ( $m/z$ ):  $[M+Na]^+$  calcd for  $C_{24}H_{36}O_4Na$ , 411.2506; found, 411.2504; Enantiomeric excess: 85%, determined by HPLC (Daicel Chiralpak IG, hexane/isopropanol = 70/30, flow rate 0.8 mL/min, T = 25 °C, 230 nm):  $t_R$  = 6.464 min (major),  $t_R$  = 7.953 min (minor).

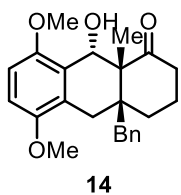

**14** (72.4 mg) was prepared according to general procedure in 63% yield. The reaction time was 90 min under 366 nm light. The product was isolated through silica gel column chromatography (6% to 20% ethyl acetate-petroleum ether) as a white solid:  $R_f$  = 0.19 (20% ethyl acetate-petroleum ether); m.p. 165 - 167 °C;  $[\alpha]_D^{20}$  +28.7 (c 0.29, DCM);  $^1H$  NMR (500 MHz,  $CDCl_3$ )  $\delta$  7.26 – 7.19 (m, 3H), 7.02 (m, 2H), 6.75 (d,  $J$  = 8.8 Hz, 1H), 6.73 (d,  $J$  = 8.8 Hz, 1H), 4.80 (d,  $J$  = 6.2 Hz, 1H), 3.95 (d,  $J$  = 6.2 Hz, 1H), 3.86 (s, 3H), 3.75 (s, 3H), 2.74 – 2.54 (m, 4H), 2.51 (s, 2H), 2.14 – 2.03 (m, 1H), 1.92 – 1.77 (m, 2H), 1.69 – 1.63 (m, 1H), 1.46 (s, 3H) ppm;  $^{13}C$  NMR (125 MHz,  $CDCl_3$ )  $\delta$

216.7, 152.0, 151.0, 137.4, 130.7 (2C), 127.8 (2C), 126.5, 126.2, 124.3, 108.9, 108.3, 72.3, 55.8, 55.6, 54.7, 42.4, 39.6, 38.4, 29.2, 27.6, 20.7, 17.6 ppm; IR  $\nu_{\max}$  3055, 1691, 1280, 1267, 1139, 742, 705  $\text{cm}^{-1}$ ; HRMS–ESI ( $m/z$ ):  $[\text{M}+\text{Na}]^+$  calcd for  $\text{C}_{24}\text{H}_{28}\text{O}_4\text{Na}$ , 403.1880; found, 403.1872; Enantiomeric excess: 89%, determined by HPLC (Daicel Chiralpak IG, hexane/isopropanol = 70/30, flow rate 0.8 mL/min, T = 25 °C, 230 nm):  $t_{\text{R}}$  = 15.999 min (major),  $t_{\text{R}}$  = 25.205 min (minor).

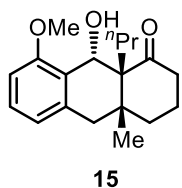

**15** (86 mg) was prepared according to general procedure in 95% yield. The reaction time was 90 min under 366 nm light. The product was isolated through silica gel column chromatography (6% to 20% ethyl acetate-petroleum ether) as a white solid:  $R_f$  = 0.6 (20% ethyl acetate-petroleum ether); m.p. 60 - 62 °C;  $[\alpha]_{\text{D}}^{20}$  -110 (c 0.52, DCM);  $^1\text{H}$  NMR (500 MHz,  $\text{CDCl}_3$ )  $\delta$  7.13 (t,  $J$  = 7.9 Hz, 1H), 6.73 (d,  $J$  = 8.2 Hz, 1H), 6.63 (d,  $J$  = 7.7 Hz, 1H), 5.39 (d,  $J$  = 3.1 Hz, 1H), 3.87 (s, 3H), 2.89 (dt,  $J$  = 3.1, 1.4 Hz, 1H), 2.84 (d,  $J$  = 16.8 Hz, 1H), 2.61 (dt,  $J$  = 14.2, 10.9 Hz, 1H), 2.36 – 2.25 (m, 2H), 2.23 (d,  $J$  = 16.9 Hz, 1H), 2.17 (dtd,  $J$  = 14.1, 3.9, 1.3 Hz, 1H), 1.99 (tt,  $J$  = 7.3, 2.3 Hz, 2H), 1.91 (td,  $J$  = 12.7, 3.5 Hz, 1H), 1.66 – 1.53 (m, 1H), 1.35 (dtd,  $J$  = 14.1, 3.9, 1.3 Hz, 1H), 1.13 (s, 3H), 0.99 (t,  $J$  = 6.5 Hz, 3H), 0.96 – 0.89 (m, 1H) ppm;  $^{13}\text{C}$  NMR (125 MHz,  $\text{CDCl}_3$ )  $\delta$  214.6, 157.2, 134.5, 127.7, 126.1, 121.3, 107.6, 62.0, 58.4, 55.2, 38.8, 38.6, 36.9, 33.0, 31.3, 23.5, 21.9, 17.1, 14.8 ppm; IR  $\nu_{\max}$  2968, 1373, 1267, 1180, 1141, 744  $\text{cm}^{-1}$ ; HRMS–ESI ( $m/z$ ):  $[\text{M}+\text{K}]^+$  calcd for  $\text{C}_{19}\text{H}_{26}\text{O}_3\text{K}$ , 341.1514; found, 341.1504; Enantiomeric excess: 88%, determined by HPLC (Daicel Chiralpak OD-H, hexane/isopropanol = 85/15, flow rate 0.8 mL/min, T = 25 °C, 230 nm):  $t_{\text{R}}$  = 6.583 min (major),  $t_{\text{R}}$  = 7.651 min (minor).

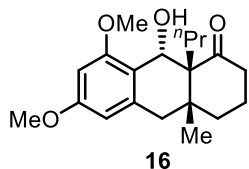

**16** (71.8 mg) was prepared according to general procedure in 72% yield. The reaction time was 90 min under 366 nm light. The product was isolated through silica gel column chromatography (6% to 20% ethyl acetate-petroleum ether) as a colorless oil;  $R_f$  = 0.39 (20% ethyl acetate-petroleum ether);  $[\alpha]_{\text{D}}^{20}$  -88.0 (c 0.54, DCM);  $^1\text{H}$  NMR (400 MHz,  $\text{CDCl}_3$ )  $\delta$  6.33 (d,  $J$  = 2.3 Hz, 1H), 6.13 (d,  $J$  = 2.3 Hz, 1H), 5.30 (s, 1H), 3.86 (s, 3H), 3.75 (s, 3H), 2.82 (d,  $J$  = 16.9 Hz, 1H), 2.70 (s, 1H), 2.65 – 2.54 (m, 1H), 2.34 – 2.21 (m, 2H), 2.21 – 2.13 (m, 2H), 2.04 – 1.95 (m, 2H), 1.89 (td,  $J$  = 12.8, 3.4 Hz, 1H), 1.62 – 1.53 (m, 1H), 1.33 (dq,  $J$  = 14.1, 2.9 Hz, 1H), 1.13 (s, 3H), 0.97 (t,  $J$  = 6.2 Hz, 3H), 0.94 – 0.85 (m, 1H) ppm;  $^{13}\text{C}$  NMR (125 MHz,  $\text{CDCl}_3$ )  $\delta$  214.6, 159.5, 158.4, 135.3, 119.1, 104.2, 96.6, 61.9, 58.4, 55.3, 55.2, 39.2, 39.1, 37.0, 33.1, 31.4, 23.7, 22.0, 17.1, 14.9 ppm; IR  $\nu_{\max}$  3053, 2966, 1674, 1492, 1271, 827, 738  $\text{cm}^{-1}$ ; HRMS–EI ( $m/z$ ):  $[\text{M}]^+$  calcd for  $\text{C}_{20}\text{H}_{28}\text{O}_4$ , 332.1988; found, 332.1990; Enantiomeric excess: 87%, determined by HPLC (Daicel Chiralpak IG, hexane/isopropanol = 70/30, flow rate 0.8 mL/min, T = 25 °C, 230 nm):  $t_{\text{R}}$  = 10.241 min (minor),  $t_{\text{R}}$  = 13.851 min (major).

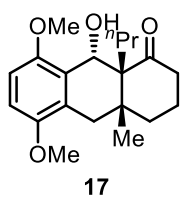

**17** (77 mg) was prepared according to general procedure in 77% yield. The reaction time was 90 min under 366 nm light. The product was isolated through silica gel column chromatography (6% to 20% ethyl acetate-petroleum ether) as a white solid:  $R_f$  = 0.3 (20% ethyl acetate-petroleum ether); m.p. 104-106 °C;  $[\alpha]_{\text{D}}^{20}$  -72.8 (c 0.25, DCM);  $^1\text{H}$  NMR (400 MHz,  $\text{CDCl}_3$ )  $\delta$  6.71 (d,  $J$  = 8.9 Hz, 1H), 6.69 (d,  $J$  = 8.9 Hz, 1H), 4.94 (d,  $J$  = 7.6 Hz, 1H), 4.25 (d,  $J$  = 7.6 Hz, 1H), 3.84 (s, 3H), 3.76 (s, 3H), 2.69 (d,  $J$  = 17.8 Hz, 1H), 2.62 – 2.44 (m, 2H), 2.40 (d,  $J$  = 17.8 Hz, 1H), 2.12 – 1.94 (m, 3H), 1.93 – 1.73 (m, 3H), 1.58 – 1.51 (m, 1H), 1.36 – 1.21 (m, 1H), 0.94 (s, 3H), 0.90 (t,  $J$  = 7.2 Hz, 3H) ppm;  $^{13}\text{C}$  NMR (100 MHz,  $\text{CDCl}_3$ )  $\delta$  218.1, 152.0, 150.8, 127.7, 124.6, 108.7, 108.4, 71.3, 57.1, 56.0, 55.6, 40.8, 39.4, 37.0, 33.9, 33.5, 22.9, 21.8, 19.2, 15.4 ppm; IR  $\nu_{\max}$  3055, 1691, 1280, 1267, 1178, 742  $\text{cm}^{-1}$ ; HRMS–ESI ( $m/z$ ):  $[\text{M}+\text{Na}]^+$  calcd for  $\text{C}_{20}\text{H}_{28}\text{O}_4\text{Na}$ , 355.1880; found, 355.1876; Enantiomeric excess: 99%, determined by HPLC (Daicel Chiralpak IG, hexane/isopropanol = 70/30, flow rate 0.8 mL/min, T = 25 °C, 230 nm):  $t_{\text{R}}$  = 11.047 min (major),  $t_{\text{R}}$  = 22.223 min (minor).

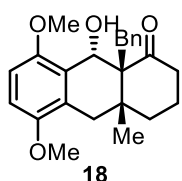

**18** (94.6 mg, d.r. = 2.3:1) was prepared according to general procedure in 83% yield. The reaction time was 90 min under 366 nm light. The product was isolated through silica gel column chromatography (6% to 20% ethyl acetate-petroleum ether) as a colorless oil:  $R_f$  = 0.38 (20% ethyl acetate-petroleum ether);  $[\alpha]_{\text{D}}^{20}$  +59.2 (c 0.10, DCM);  $^1\text{H}$  NMR (400 MHz,  $\text{CDCl}_3$ )  $\delta$  7.12 – 7.01 (m, 5H), 6.75 (d,  $J$  = 8.8 Hz, 1H), 6.69 (d,  $J$  = 8.8 Hz, 1H), 4.69 (d,  $J$  = 3.6 Hz, 1H), 3.82 (s, 3H), 3.65 (s, 3H), 3.31 (d,  $J$  = 13.9 Hz, 1H), 3.09 – 2.96 (m, 2H), 2.79 (d,  $J$  =

18.6 Hz, 1H), 2.64 (d,  $J = 18.6$  Hz, 1H), 2.60 (dt,  $J = 18.6, 5.8$  Hz, 1H), 2.49 (d,  $J = 13.9$  Hz, 1H), 2.53 – 2.43 (m, 1H), 2.05 – 1.82 (m, 2H), 1.33 – 1.27 (m, 1H), 1.09 (s, 3H) ppm;  $^{13}\text{C}$  NMR (100 MHz,  $\text{CDCl}_3$ )  $\delta$  216.1, 151.5, 151.2, 139.3, 131.5 (2C), 127.5 (2C), 126.4, 125.7, 124.5, 108.8, 107.8, 67.0, 58.2, 55.7, 55.6, 40.6, 37.9, 36.6, 35.8, 33.8, 24.4, 20.3 ppm; IR  $\nu_{\text{max}}$  3055, 1697, 1282, 1267, 1178, 705  $\text{cm}^{-1}$ ; HRMS–ESI ( $m/z$ ):  $[\text{M}+\text{Na}]^+$  calcd for  $\text{C}_{24}\text{H}_{28}\text{O}_4\text{Na}$ , 403.1880; found, 403.1875; Enantiomeric excess: 99%, determined by HPLC (Daicel Chiralpak IG, hexane/isopropanol = 70/30, flow rate 0.8 mL/min,  $T = 25$  °C, 230 nm):  $t_{\text{R}} = 7.432$  min (major),  $t_{\text{R}} = 13.839$  min (minor).

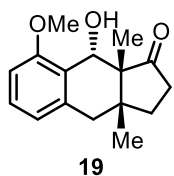

**19** (66.2 mg, d.r. = 12:1) was prepared according to general procedure in 85% yield. The reaction time was 90 min under 366 nm light. The product was isolated through silica gel column chromatography (6% to 20% ethyl acetate-petroleum ether) as a white solid:  $R_f = 0.2$  (20% ethyl acetate-petroleum ether); m.p. 110 – 112 °C;  $[\alpha]_{\text{D}}^{20} +89.4$  (c 0.48, DCM);  $^1\text{H}$  NMR (400 MHz,  $\text{CDCl}_3$ )  $\delta$  7.21 (t,  $J = 8.0$  Hz, 1H), 6.78 (d,  $J = 7.6$  Hz, 1H), 6.74 (d,  $J = 8.2$  Hz, 1H), 4.88 (d,  $J = 3.0$  Hz, 1H), 3.83 (s, 3H), 2.96 (d,  $J = 16.8$  Hz, 1H), 2.75 (d,  $J = 3.5$  Hz, 1H), 2.67 (d,  $J = 16.8$  Hz, 1H), 2.46 – 2.36 (m, 1H), 2.27 (q,  $J = 9.9, 9.2$  Hz, 1H), 2.23 – 2.14 (m, 1H), 1.63 – 1.55 (m, 1H), 0.95 (s, 3H), 0.93 (s, 3H) ppm;  $^{13}\text{C}$  NMR (100 MHz,  $\text{CDCl}_3$ )  $\delta$  221.7, 157.6, 136.6, 128.6, 124.6, 121.3, 107.9, 69.6, 55.4 (d,  $J = 3.0$  Hz), 54.2, 40.0, 38.9, 37.2, 32.5, 25.9, 16.6 ppm; IR  $\nu_{\text{max}}$  2308, 1531, 1492, 1398, 1267, 904, 798, 748, 698, 653  $\text{cm}^{-1}$ ; HRMS–ESI ( $m/z$ ):  $[\text{M}+\text{Na}]^+$  calcd for  $\text{C}_{16}\text{H}_{20}\text{O}_3\text{Na}$ , 283.1305; found, 283.1301; Enantiomeric excess: 98%, determined by HPLC (Daicel Chiralpak AS-H, hexane/isopropanol = 90/10, flow rate 0.8 mL/min,  $T = 25$  °C, 230 nm):  $t_{\text{R}} = 32.496$  min (minor),  $t_{\text{R}} = 44.993$  min (major).

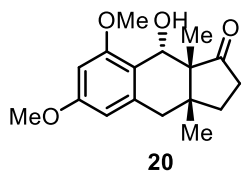

**20** (81.7 mg, d.r. = 5:1) was prepared according to general procedure in 94% yield. The reaction time was 90 min under 366 nm light. The product was isolated through silica gel column chromatography (6% to 20% ethyl acetate-petroleum ether) as a white solid:  $R_f = 0.17$  (20% ethyl acetate-petroleum ether); m.p. 132 – 134 °C;  $[\alpha]_{\text{D}}^{20} +95.9$  (c 0.28, DCM);  $^1\text{H}$  NMR (400 MHz,  $\text{CDCl}_3$ )  $\delta$  6.33 (d,  $J = 2.3$  Hz, 1H), 6.29 (d,  $J = 2.4$  Hz, 1H), 4.82 (d,  $J = 2.8$  Hz, 1H), 3.81 (s, 3H), 3.80 (s, 3H), 2.92 (d,  $J = 16.8$  Hz, 1H), 2.64 (d,  $J = 16.8$  Hz, 1H), 2.58 (d,  $J = 3.6$  Hz, 1H), 2.47 – 2.34 (m, 1H), 2.32 – 2.14 (m, 3H), 0.95 (s, 3H), 0.92 (s, 3H) ppm;  $^{13}\text{C}$  NMR (100 MHz,  $\text{CDCl}_3$ )  $\delta$  221.8, 160.2, 158.7, 137.4, 117.3, 104.4, 96.5, 69.4, 55.4, 55.3, 54.3, 40.1, 39.4, 37.3, 32.6, 25.9, 16.6 ppm; IR  $\nu_{\text{max}}$  2306, 1735, 1305, 1267, 1122, 744  $\text{cm}^{-1}$ ; HRMS–ESI ( $m/z$ ):  $[\text{M}+\text{Na}]^+$  calcd for  $\text{C}_{17}\text{H}_{22}\text{O}_4\text{Na}$ , 313.1410; found, 313.1408; Enantiomeric excess: 97%, determined by HPLC (Daicel Chiralpak IG, hexane/isopropanol = 90/10, flow rate 0.8 mL/min,  $T = 25$  °C, 230 nm):  $t_{\text{R}} = 29.535$  min (minor),  $t_{\text{R}} = 60.764$  min (major).

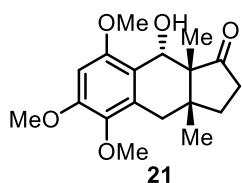

**21** (61.5 mg) was prepared according to general procedure in 64% yield. The reaction time was 90 min under 366 nm light. The product was isolated through silica gel column chromatography (6% to 20% ethyl acetate-petroleum ether) as a white solid:  $R_f = 0.11$  (20% ethyl acetate-petroleum ether); m.p. 128 – 130 °C;  $[\alpha]_{\text{D}}^{20} +85.4$  (c 1.13, DCM);  $^1\text{H}$  NMR (400 MHz,  $\text{CDCl}_3$ )  $\delta$  6.40 (s, 1H), 4.84 (d,  $J = 3.4$  Hz, 1H), 3.88 (s, 3H), 3.83 (s, 3H), 3.77 (s, 3H), 3.00 (d,  $J = 17.2$  Hz, 1H), 2.61 (d,  $J = 17.2$  Hz, 1H), 2.61 (d,  $J = 3.5$  Hz, 1H), 2.44 – 2.34 (m, 1H), 2.32 – 2.10 (m, 2H), 1.65 – 1.57 (m, 1H), 0.96 (s, 3H), 0.90 (s, 3H) ppm;  $^{13}\text{C}$  NMR (125 MHz,  $\text{CDCl}_3$ )  $\delta$  222.0, 154.1, 152.5, 140.2, 130.4, 117.1, 94.6, 69.5, 60.4, 55.9, 55.7, 54.0, 39.8, 37.3, 32.9, 32.7, 26.1, 16.7 ppm; IR  $\nu_{\text{max}}$  3055, 1734, 1492, 1236, 1074, 738  $\text{cm}^{-1}$ ; HRMS–ESI ( $m/z$ ):  $[\text{M}+\text{Na}]^+$  calcd for  $\text{C}_{18}\text{H}_{24}\text{O}_5\text{Na}$ , 343.1516; found, 343.1510; Enantiomeric excess: 92%, determined by HPLC (Daicel Chiralpak IG, hexane/isopropanol = 70/30, flow rate 0.8 mL/min,  $T = 25$  °C, 230 nm):  $t_{\text{R}} = 13.698$  min (major),  $t_{\text{R}} = 19.137$  min (minor).

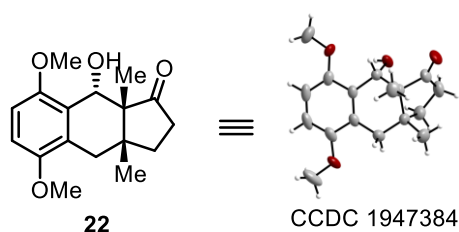

**22** (69.1 mg) was prepared according to general procedure in 79% yield. The reaction time was 90 min under 366 nm light. The product was isolated through silica gel column chromatography (6% to 20% ethyl acetate-petroleum ether) as a white solid:  $R_f = 0.18$  (20% ethyl acetate-petroleum ether); m.p. 147 – 149 °C;  $[\alpha]_D^{20} +75.5$  (c 0.55, DCM); and it was recrystallized from ethyl acetate /hexane (V/V = 1/5) at 25 °C, to obtain colorless crystals, CCDC (1947384).  $^1\text{H NMR}$  (500 MHz,  $\text{CDCl}_3$ )  $\delta$  6.74 (d,  $J = 8.8$  Hz, 1H), 6.69 (d,  $J = 8.8$  Hz, 1H), 4.81 (d,  $J = 3.6$  Hz, 1H), 3.81 (s, 3H), 3.80 (s, 3H), 2.95 (d,  $J = 18.2$  Hz, 1H), 2.88 (d,  $J = 3.6$  Hz, 1H), 2.47 (d,  $J = 18.2$  Hz, 1H), 2.41 – 2.33 (m, 1H), 2.27 – 2.15 (m, 2H), 1.60 – 1.52 (m, 1H), 0.99 (s, 3H), 0.93 (s, 3H) ppm;  $^{13}\text{C NMR}$  (125 MHz,  $\text{CDCl}_3$ )  $\delta$  221.8, 151.6, 151.1, 125.5, 124.8, 109.0, 107.2, 69.7, 55.7, 55.5, 53.4, 39.0, 37.1, 32.3, 32.2, 26.2, 16.0 ppm; IR  $\nu_{\text{max}}$  3053, 1735, 1267, 1180, 1139, 740  $\text{cm}^{-1}$ ; HRMS–EI ( $m/z$ ):  $[\text{M}]^+$  calcd for  $\text{C}_{17}\text{H}_{22}\text{O}_4$ , 290.1518; found, 290.1514; Enantiomeric excess: 95%, determined by HPLC (Daicel Chiralpak IG, hexane/isopropanol = 70/30, flow rate 0.8 mL/min, T = 25 °C, 230 nm):  $t_R = 10.883$  min (major),  $t_R = 17.052$  min (minor).

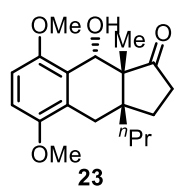

**23** (78.4 mg) was prepared according to general procedure in 82% yield. The reaction time was 90 min under 366 nm light. The product was isolated through silica gel column chromatography (6% to 20% ethyl acetate-petroleum ether) as a white solid:  $R_f = 0.18$  (20% ethyl acetate-petroleum ether); m.p. 110 – 112 °C;  $[\alpha]_D^{20} +73.9$  (c 0.68, DCM);  $^1\text{H NMR}$  (500 MHz,  $\text{CDCl}_3$ )  $\delta$  6.74 (d,  $J = 8.8$  Hz, 1H), 6.68 (d,  $J = 8.8$  Hz, 1H), 4.80 (d,  $J = 3.3$  Hz, 1H), 3.83 (s, 3H), 3.82 (s, 3H), 3.02 (d,  $J = 18.2$  Hz, 1H), 3.01 (s, 1H), 2.45 (d,  $J = 18.2$  Hz, 1H), 2.38 – 2.29 (m, 1H), 2.20 – 2.10 (m, 1H), 2.09 – 2.00 (m, 1H), 1.85 – 1.77 (m, 1H), 1.52 – 1.35 (m, 2H), 1.27 – 1.09 (m, 2H), 0.95 (s, 3H), 0.92 (t,  $J = 7.2$  Hz, 3H) ppm;  $^{13}\text{C NMR}$  (125 MHz,  $\text{CDCl}_3$ )  $\delta$  222.2, 151.6, 151.2, 125.5, 124.8, 108.9, 107.3, 70.0, 55.62, 55.56, 54.3, 41.8, 39.8, 36.7, 29.6, 27.0, 16.8, 15.7, 15.0 ppm; IR  $\nu_{\text{max}}$  3061, 1735, 1267, 1171, 1060, 742  $\text{cm}^{-1}$ ; HRMS–EI ( $m/z$ ):  $[\text{M}]^+$  calcd for  $\text{C}_{19}\text{H}_{26}\text{O}_4$ , 318.1831; found, 318.1834; Enantiomeric excess: 93%, determined by HPLC (Daicel Chiralpak IG, hexane/isopropanol = 70/30, flow rate 0.8 mL/min, T = 25 °C, 230 nm):  $t_R = 11.074$  min (major),  $t_R = 14.873$  min (minor).

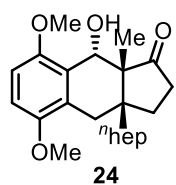

**24** (95.5 mg) was prepared according to general procedure in 85% yield. The reaction time was 90 min under 366 nm light. The product was isolated through silica gel column chromatography (6% to 20% ethyl acetate-petroleum ether) as a white solid:  $R_f = 0.29$  (20% ethyl acetate-petroleum ether); m.p. 114 – 116 °C;  $[\alpha]_D^{20} +58.6$  (c 0.40, DCM);  $^1\text{H NMR}$  (500 MHz,  $\text{CDCl}_3$ )  $\delta$  6.74 (d,  $J = 8.8$  Hz, 1H), 6.69 (d,  $J = 8.8$  Hz, 1H), 4.80 (d,  $J = 2.7$  Hz, 1H), 3.81 (s, 3H), 3.80 (s, 3H), 3.00 (d,  $J = 18.2$  Hz, 1H), 2.96 (d,  $J = 3.6$  Hz, 1H), 2.41 (d,  $J = 18.2$  Hz, 1H), 2.37 – 2.30 (m, 1H), 2.14 (m, 1H), 2.09 – 2.00 (m, 1H), 1.85 – 1.77 (m, 1H), 1.48 – 1.23 (m, 10H), 1.21 – 1.08 (m, 2H), 0.95 (s, 3H), 0.89 (t,  $J = 6.9$  Hz, 3H) ppm;  $^{13}\text{C NMR}$  (125 MHz,  $\text{CDCl}_3$ )  $\delta$  222.2, 151.6, 151.2, 125.5, 124.8, 108.9, 107.3, 70.0, 55.61, 55.56, 54.4, 41.8, 37.3, 36.8, 31.9, 30.5, 29.5, 29.3, 27.0, 23.6, 22.6, 15.7, 14.1 ppm; IR  $\nu_{\text{max}}$  3062, 1735, 1267, 1171, 1139, 740  $\text{cm}^{-1}$ ; HRMS–ESI ( $m/z$ ):  $[\text{M}+\text{Na}]^+$  calcd for  $\text{C}_{23}\text{H}_{34}\text{O}_4\text{Na}$ , 397.2349; found, 397.2344; Enantiomeric excess: 91%, determined by HPLC (Daicel Chiralpak IG, hexane/isopropanol = 70/30, flow rate 0.8 mL/min, T = 25 °C, 230 nm):  $t_R = 8.896$  min (major),  $t_R = 10.430$  min (minor).

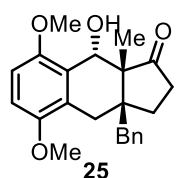

**25** (94.5 mg) was prepared according to general procedure in 86% yield. The reaction time was 90 min under 366 nm light. The product was isolated through silica gel column chromatography (6% to 20% ethyl acetate-petroleum ether) as a white solid:  $R_f = 0.21$  (20% ethyl acetate-petroleum ether); m.p. 184 – 186 °C;  $[\alpha]_D^{20} +70.7$  (c 0.58, DCM);  $^1\text{H NMR}$  (500 MHz,  $\text{CDCl}_3$ )  $\delta$  7.38 – 7.30 (m, 2H), 7.31 – 7.25 (m, 1H), 7.23 – 7.17 (m, 2H), 6.74 (d,  $J = 8.8$  Hz, 1H), 6.70 (d,  $J = 8.8$  Hz, 1H), 4.87 (d,  $J = 3.8$  Hz, 1H), 3.82 (s, 3H), 3.79 (s, 3H), 3.13 (d,  $J = 3.8$  Hz, 1H), 2.88 (d,  $J = 18.0$  Hz, 1H), 2.64 (d,  $J = 18.0$  Hz, 1H), 2.57 (d,  $J = 12.7$  Hz, 1H), 2.48 – 2.28 (m, 3H), 1.94 – 1.83 (m, 1H), 1.77 – 1.65 (m, 1H), 1.12 (s, 3H) ppm;  $^{13}\text{C NMR}$  (125 MHz,  $\text{CDCl}_3$ )  $\delta$  221.4, 151.5, 151.2, 137.8, 130.4 (2C), 128.1 (2C), 126.4, 125.4, 124.3, 109.0, 107.4, 70.3, 55.62, 55.59, 54.7, 43.2, 42.6, 36.8, 29.3, 26.5, 15.8 ppm; IR  $\nu_{\text{max}}$  3651, 1735, 1479, 1265, 1012, 742  $\text{cm}^{-1}$ ; HRMS–EI ( $m/z$ ):  $[\text{M}]^+$  calcd for  $\text{C}_{23}\text{H}_{26}\text{O}_4$ , 366.1831; found, 366.1826; Enantiomeric excess: 95%, determined by HPLC (Daicel

Chiralpak IG, hexane/isopropanol = 70/30, flow rate 0.8 mL/min, T = 25 °C, 230 nm):  $t_R$  = 11.349 min (major),  $t_R$  = 15.958 min (minor).

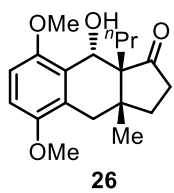

26

**26** (74.4 mg) was prepared according to general procedure in 78% yield. The reaction time was 90 min under 366 nm light. The product was isolated through silica gel column chromatography (6% to 20% ethyl acetate-petroleum ether) as a white solid:  $R_f$  = 0.26 (20% ethyl acetate-petroleum ether); m.p. 124 – 126 °C;  $[\alpha]_D^{20}$  +72.2 (c 0.22, DCM);  $^1\text{H NMR}$  (500 MHz,  $\text{CDCl}_3$ )  $\delta$  6.73 (d,  $J$  = 8.8 Hz, 1H), 6.69 (d,  $J$  = 8.8 Hz, 1H), 4.94 (s, 1H), 3.81 (s, 3H), 3.81 (s, 3H), 3.01 (d,  $J$  = 3.4 Hz, 1H), 2.93 (d,  $J$  = 18.4 Hz, 1H), 2.55 (d,  $J$  = 18.4 Hz, 1H), 2.38 – 2.28 (m, 1H), 2.27 – 2.07 (m, 2H), 1.77 (td,  $J$  = 13.9, 3.9 Hz, 1H), 1.54 – 1.47 (m, 1H), 1.36 (td,  $J$  = 13.9, 3.9 Hz, 1H), 1.18 – 1.09 (m, 1H), 1.06 (s, 3H), 0.99 – 0.88 (m, 1H), 0.78 (t,  $J$  = 7.2 Hz, 3H) ppm;  $^{13}\text{C NMR}$  (125 MHz,  $\text{CDCl}_3$ )  $\delta$  221.6, 151.1, 150.9, 126.8, 124.8, 108.6, 107.1, 68.0, 55.8, 55.54, 55.48, 39.4, 36.8, 35.3, 34.3, 33.1, 25.6, 16.6, 15.2 ppm; IR  $\nu_{\text{max}}$  3053, 1735, 1282, 1267, 1139, 742  $\text{cm}^{-1}$ ; HRMS–EI ( $m/z$ ):  $[\text{M}]^+$  calcd for  $\text{C}_{19}\text{H}_{26}\text{O}_4$ , 318.1831; found, 366.1826; Enantiomeric excess: 90%, determined by HPLC (Daicel Chiralpak IG, hexane/isopropanol = 70/30, flow rate 0.8 mL/min, T = 25 °C, 230 nm):  $t_R$  = 11.404 min (major),  $t_R$  = 14.586 min (minor).

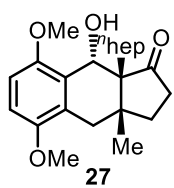

27

**27** (84.9 mg) was prepared according to general procedure in 76% yield. The reaction time was 90 min under 366 nm light. The product was isolated through silica gel column chromatography (6% to 20% ethyl acetate-petroleum ether) as a white solid:  $R_f$  = 0.32 (20% ethyl acetate-petroleum ether); m.p. 100 – 102 °C;  $[\alpha]_D^{20}$  +67.1 (c 0.31, DCM);  $^1\text{H NMR}$  (500 MHz,  $\text{CDCl}_3$ )  $\delta$  6.74 (d,  $J$  = 8.8 Hz, 1H), 6.69 (d,  $J$  = 8.8 Hz, 1H), 4.93 (s, 1H), 3.82 (s, 3H), 3.81 (s, 3H), 3.04 (d,  $J$  = 3.4 Hz, 1H), 2.93 (d,  $J$  = 18.4 Hz, 1H), 2.55 (d,  $J$  = 18.4 Hz, 1H), 2.37 – 2.28 (m, 1H), 2.26 – 2.07 (m, 2H), 1.83 – 1.73 (m, 1H), 1.50 (m, 1H), 1.43 – 1.35 (m, 1H), 1.26 – 1.09 (m, 9H), 1.06 (s, 3H), 1.00 – 0.87 (m, 1H), 0.82 (t,  $J$  = 7.2 Hz, 3H) ppm;  $^{13}\text{C NMR}$  (125 MHz,  $\text{CDCl}_3$ )  $\delta$  221.7, 151.1, 150.9, 126.9, 124.9, 108.7, 107.1, 68.1, 55.7, 55.6, 55.5, 39.5, 36.8, 34.2, 33.0, 32.9, 31.8, 30.6, 28.7, 25.5, 22.9, 22.5, 14.0 ppm; IR  $\nu_{\text{max}}$  3053, 1735, 1282, 1267, 1139, 742  $\text{cm}^{-1}$ ; HRMS–ESI ( $m/z$ ):  $[\text{M}+\text{Na}]^+$  calcd for  $\text{C}_{23}\text{H}_{34}\text{O}_4\text{Na}$ , 397.2349; found, 397.2345; Enantiomeric excess: 93%, determined by HPLC (Daicel Chiralpak IG, hexane/isopropanol = 70/30, flow rate 0.8 mL/min, T = 25 °C, 230 nm):  $t_R$  = 10.097 min (major),  $t_R$  = 11.136 min (minor).

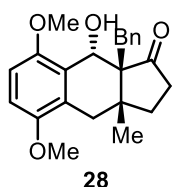

28

**28** (93.7 mg) was prepared according to general procedure in 85% yield. The reaction time was 90 min under 366 nm light. The product was isolated through silica gel column chromatography (6% to 20% ethyl acetate-petroleum ether) as a white solid:  $R_f$  = 0.26 (20% ethyl acetate-petroleum ether); m.p. 129 – 131 °C;  $[\alpha]_D^{20}$  +101 (c 0.44, DCM);  $^1\text{H NMR}$  (400 MHz,  $\text{CDCl}_3$ )  $\delta$  7.12 – 7.07 (m, 2H), 7.05 – 6.99 (m, 3H), 6.64 (d,  $J$  = 8.8 Hz, 1H), 6.60 (d,  $J$  = 8.8 Hz, 1H), 5.11 (d,  $J$  = 3.4 Hz, 1H), 3.74 (s, 3H), 3.73 (s, 3H), 3.11 (d,  $J$  = 14.3 Hz, 1H), 2.82 (d,  $J$  = 18.5 Hz, 1H), 2.76 (d,  $J$  = 3.9 Hz, 1H), 2.55 (d,  $J$  = 14.3 Hz, 1H), 2.44 – 2.18 (m, 4H), 1.56 – 1.49 (m, 1H), 1.20 (s, 3H) ppm;  $^{13}\text{C NMR}$  (100 MHz,  $\text{CDCl}_3$ )  $\delta$  220.9, 151.12, 151.06, 137.6, 130.5 (2C), 127.5 (2C), 126.0, 125.8, 124.9, 109.0, 107.3, 66.5, 57.0, 55.72, 55.66, 39.9, 36.99, 36.98, 33.2, 32.9, 25.9 ppm; IR  $\nu_{\text{max}}$  3055, 1421, 1267, 1178, 1139, 742  $\text{cm}^{-1}$ ; HRMS–ESI ( $m/z$ ):  $[\text{M}+\text{Na}]^+$  calcd for  $\text{C}_{23}\text{H}_{26}\text{O}_4\text{Na}$ , 389.1723; found, 389.1718; Enantiomeric excess: 89%, determined by HPLC (Daicel Chiralpak IG, hexane/isopropanol = 70/30, flow rate 0.8 mL/min, T = 25 °C, 230 nm):  $t_R$  = 10.963 min (major),  $t_R$  = 18.918 min (minor).

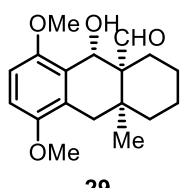

29

**29** (86 mg) was prepared according to general procedure in 94% yield. Ligand **L10** (0.24 mmol, 0.8 equiv.) was used. The reaction time was 90 min under 366 nm light. The product was isolated through silica gel column chromatography (6% to 20% ethyl acetate-petroleum ether) as a white solid:  $R_f$  = 0.32 (20% ethyl acetate-petroleum ether); m.p. 85 – 87 °C;  $[\alpha]_D^{20}$  +23.3 (c 0.88, DCM);  $^1\text{H NMR}$  (400 MHz,  $\text{CDCl}_3$ )  $\delta$  9.84 (s, 1H), 6.75 (d,  $J$  = 8.9 Hz, 1H), 6.72 (d,  $J$  = 8.9 Hz, 1H), 5.13 (s, 1H), 3.86 (s, 3H), 3.80 (s, 3H), 3.63 (s, 1H), 2.76 (d,  $J$  = 18.3 Hz, 1H), 2.55 (d,  $J$  = 18.3 Hz, 1H), 1.88 (dt,  $J$  = 17.2, 5.7 Hz, 1H), 1.66 (s, 1H), 1.57 – 1.40 (m, 6H), 1.16 (s, 3H) ppm;  $^{13}\text{C NMR}$  (125 MHz,  $\text{CDCl}_3$ )  $\delta$  205.8, 151.7, 151.3, 125.4, 124.8, 108.7, 107.3, 68.3, 55.6, 55.5, 53.9, 35.0, 34.7, 33.7, 24.1, 20.8, 20.6

ppm; IR  $\nu_{\max}$  1373, 1282, 1267, 1180, 1141, 800, 744, 707  $\text{cm}^{-1}$ ; HRMS–ESI ( $m/z$ ):  $[\text{M}+\text{Na}]^+$  calcd for  $\text{C}_{18}\text{H}_{24}\text{O}_4\text{Na}$ , 327.1567; found, 327.1556; Enantiomeric excess: 93%, determined by HPLC (Daicel Chiralpak IG, hexane/isopropanol = 70/30, flow rate 0.8 mL/min, T = 25 °C, 230 nm):  $t_{\text{R}}$  = 13.622 min (major),  $t_{\text{R}}$  = 22.610 min (minor).

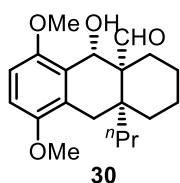

**30** (94 mg) was prepared according to general procedure in 94% yield. Ligand **L10** (0.24 mmol, 0.8 equiv.) was used. The reaction time was 90 min under 366 nm light. The product was isolated through silica gel column chromatography (6% to 20% ethyl acetate-petroleum ether) as a white solid:  $R_f$  = 0.35 (20% ethyl acetate-petroleum ether); m.p. 116 – 118 °C;  $[\alpha]_{\text{D}}^{20}$  +35.6 (c 1.44, DCM);  $^1\text{H}$  NMR (400 MHz,  $\text{CDCl}_3$ )  $\delta$  9.81 (s, 1H), 6.75 (d,  $J$  = 8.8 Hz, 1H), 6.72 (d,  $J$  = 8.8 Hz, 1H), 5.21 (s, 1H), 3.96 (s, 1H), 3.86 (s, 3H), 3.80 (s, 3H), 2.80 (d,  $J$  = 18.4 Hz, 1H), 2.63 (d,  $J$  = 18.4 Hz, 1H), 2.05 – 1.86 (m, 2H), 1.73 (d,  $J$  = 14.6 Hz, 1H), 1.66 – 1.45 (m, 5H), 1.37 – 1.24 (m, 3H), 1.14 (s, 1H), 0.89 (t,  $J$  = 7.2 Hz, 3H) ppm;  $^{13}\text{C}$  NMR (100 MHz,  $\text{CDCl}_3$ )  $\delta$  205.7, 151.8, 151.4, 125.4, 124.9, 108.7, 107.4, 67.6, 55.6 (dd,  $J$  = 12.1, 5.2 Hz, 2C), 54.7, 36.9, 36.8, 31.7, 29.7, 22.5, 20.5, 20.3, 15.8, 14.9 ppm; IR  $\nu_{\max}$  2954, 1724, 1479, 1255, 1082, 800, 742, 705  $\text{cm}^{-1}$ ; HRMS–ESI ( $m/z$ ):  $[\text{M}+\text{Na}]^+$  calcd for  $\text{C}_{20}\text{H}_{28}\text{O}_4\text{Na}$ , 355.1880; found, 355.1866; Enantiomeric excess: 93%, determined by HPLC (Daicel Chiralpak IG, hexane/isopropanol = 70/30, flow rate 0.8 mL/min, T = 25 °C, 230 nm):  $t_{\text{R}}$  = 10.734 min (major),  $t_{\text{R}}$  = 12.232 min (minor).

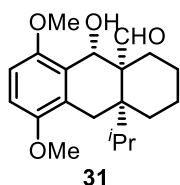

**31** (56 mg) was prepared according to general procedure in 56% yield. The reaction time was 90 min under 366 nm light. The product was isolated through silica gel column chromatography (6% to 20% ethyl acetate-petroleum ether) as a colorless oil:  $R_f$  = 0.3 (20% ethyl acetate-petroleum ether);  $[\alpha]_{\text{D}}^{20}$  +61.3 (c 0.90, DCM);  $^1\text{H}$  NMR (500 MHz,  $\text{CDCl}_3$ )  $\delta$  10.02 (s, 1H), 6.74 (d,  $J$  = 8.9 Hz, 1H), 6.71 (d,  $J$  = 8.9 Hz, 1H), 5.27 (s, 1H), 4.02 (s, 1H), 3.85 (s, 3H), 3.81 (s, 3H), 2.94 (d,  $J$  = 18.4 Hz, 1H), 2.59 (d,  $J$  = 18.4 Hz, 1H), 2.41 (hept,  $J$  = 6.8 Hz, 1H), 1.97 – 1.86 (m, 1H), 1.86 – 1.76 (m, 1H), 1.70 – 1.60 (m, 3H), 1.56 – 1.49 (m, 2H), 1.48 – 1.35 (m, 1H), 0.92 (d,  $J$  = 6.8 Hz, 3H), 0.87 (d,  $J$  = 6.8 Hz, 3H) ppm;  $^{13}\text{C}$  NMR (125 MHz,  $\text{CDCl}_3$ )  $\delta$  207.2, 151.7, 151.5, 125.1, 125.0, 108.6, 107.4, 67.9, 55.6, 55.5, 54.4, 40.5, 29.0, 28.8, 26.2, 20.0, 19.4, 19.2(2C), 18.2 ppm; IR  $\nu_{\max}$  1396, 1267, 1051, 904, 746, 698, 651  $\text{cm}^{-1}$ ; HRMS–ESI ( $m/z$ ):  $[\text{M}+\text{Na}]^+$  calcd for  $\text{C}_{20}\text{H}_{28}\text{O}_4\text{Na}$ , 355.1880; found, 355.1867; Enantiomeric excess: 94%, determined by HPLC (Daicel Chiralpak OD-H, hexane/isopropanol = 85/15, flow rate 0.8 mL/min, T = 25 °C, 230 nm):  $t_{\text{R}}$  = 14.467 min (major),  $t_{\text{R}}$  = 18.503 min (minor).

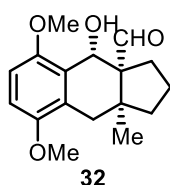

**32** (41.4 mg) was prepared according to general procedure in 48% yield. Ligand **L10** (0.24 mmol, 0.8 equiv.) was used. The reaction time was 90 min under 366 nm light. The product was isolated through silica gel column chromatography (6% to 20% ethyl acetate-petroleum ether) as a yellow oil:  $R_f$  = 0.42 (20% ethyl acetate-petroleum ether);  $[\alpha]_{\text{D}}^{20}$  +8.4 (c 0.12, DCM);  $^1\text{H}$  NMR (400 MHz,  $\text{CDCl}_3$ )  $\delta$  9.83 (s, 1H), 6.77 (d,  $J$  = 8.9 Hz, 1H), 6.72 (d,  $J$  = 8.9 Hz, 1H), 5.17 (d,  $J$  = 2.1 Hz, 1H), 3.83 (s, 3H), 3.80 (s, 3H), 2.80 (d,  $J$  = 16.6 Hz, 1H), 2.72 (d,  $J$  = 16.6 Hz, 1H), 2.19 – 2.08 (m, 1H), 1.71 – 1.57 (m, 3H), 1.53 – 1.37 (m, 2H), 1.22 (s, 3H) ppm;  $^{13}\text{C}$  NMR (125 MHz,  $\text{CDCl}_3$ )  $\delta$  206.2, 151.38, 151.33, 126.5, 125.8, 109.9, 108.3, 68.4, 61.2, 55.98, 55.96, 43.7, 41.1, 34.3, 31.3, 25.0, 21.5 ppm; IR  $\nu_{\max}$  2985, 1697, 1280, 1267, 742  $\text{cm}^{-1}$ ; HRMS–ESI ( $m/z$ ):  $[\text{M}+\text{Na}]^+$  calcd for  $\text{C}_{17}\text{H}_{22}\text{O}_4\text{Na}$ , 313.1410; found, 313.1406; Enantiomeric excess: 93%, determined by HPLC (Daicel Chiralpak IG, hexane/isopropanol = 70/30, flow rate 0.8 mL/min, T = 25 °C, 230 nm):  $t_{\text{R}}$  = 10.239 min (major),  $t_{\text{R}}$  = 11.706 min (minor).

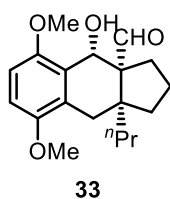

**33** (88 mg) was prepared according to general procedure in 92% yield. Ligand **L10** (0.24 mmol, 0.8 equiv.) was used. The reaction time was 90 min under 366 nm light. The product was isolated through silica gel column chromatography (6% to 20% ethyl acetate-petroleum ether) as a colorless oil:  $R_f$  = 0.35 (20% ethyl acetate-petroleum ether);  $[\alpha]_{\text{D}}^{20}$  +14.3 (c 0.96, DCM);  $^1\text{H}$  NMR (400 MHz,  $\text{CDCl}_3$ )  $\delta$  9.83 (s, 1H), 6.77 (d,  $J$  = 8.9 Hz, 1H), 6.71 (d,  $J$  = 8.9 Hz, 1H), 5.20 (d,  $J$  = 1.8 Hz, 1H), 3.84 (d,  $J$  = 1.8 Hz, 1H), 3.82 (s, 3H), 3.79 (s, 3H), 2.94 (d,  $J$  = 16.4 Hz, 1H), 2.62 (d,  $J$  = 16.4 Hz, 1H), 2.85 – 1.99 (m, 1H), 1.83 – 1.73 (m, 1H), 1.70 – 1.58 (m, 2H), 1.57 – 1.52 (m, 1H), 1.51 – 1.45 (m, 3H), 1.44 – 1.28 (m, 2H), 0.88 (t,  $J$  = 6.5 Hz, 3H) ppm;  $^{13}\text{C}$  NMR (100 MHz,  $\text{CDCl}_3$ )  $\delta$  206.7, 151.5, 151.4, 126.9,

125.9, 110.2, 108.5, 68.2 (d,  $J = 3.0$  Hz), 62.3, 56.2 (t,  $J = 3.0$  Hz, 2C), 48.1, 40.1, 38.6, 31.6, 30.7, 22.1, 18.5, 15.0 ppm; IR  $\nu_{\max}$  2956, 1714, 1489, 1265, 1085, 742  $\text{cm}^{-1}$ ; HRMS–ESI ( $m/z$ ):  $[\text{M}+\text{Na}]^+$  calcd for  $\text{C}_{19}\text{H}_{26}\text{O}_4\text{Na}$ , 341.1723; found, 341.1714; Enantiomeric excess: 91%, determined by HPLC (Daicel Chiralpak IG, hexane/isopropanol = 70/30, flow rate 0.8 mL/min,  $T = 25$  °C, 230 nm):  $t_{\text{R}} = 9.717$  min (minor),  $t_{\text{R}} = 13.171$  min (major).

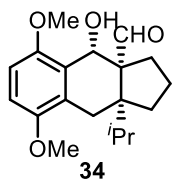

**34** (75 mg) was prepared according to general procedure A from **7** (0.3 mmol) and **16** in 79% yield. Ligand **L10** (0.24 mmol, 0.8 equiv.) was used. The reaction time was 90 min under 366 nm light. The product was isolated through silica gel column chromatography (6% to 20% ethyl acetate-petroleum ether) as a yellow oil:  $R_f = 0.55$  (20% ethyl acetate-petroleum ether);  $[\alpha]_{\text{D}}^{20} +3.79$  (c 1.52, DCM);  $^1\text{H NMR}$  (500 MHz,  $\text{CDCl}_3$ )  $\delta$  9.95 (s, 1H), 6.77 (d,  $J = 8.9$  Hz, 1H), 6.70 (d,  $J = 8.8$  Hz, 1H), 5.34 (s, 1H), 3.80 (s, 3H), 3.79 (s, 3H), 3.53 (s, 1H), 2.95 (d,  $J = 15.5$  Hz, 1H), 2.65 (d,  $J = 15.5$  Hz, 1H), 2.14 (hept,  $J = 6.8$  Hz, 1H), 1.94 (dt,  $J = 13.7, 7.4$  Hz, 1H), 1.89 – 1.83 (m, 1H), 1.65 – 1.57 (m, 1H), 1.56 – 1.47 (m, 1H), 1.35 – 1.27 (m, 1H), 1.16 – 1.07 (m, 1H), 1.02 (d,  $J = 6.7$  Hz, 3H), 0.95 (d,  $J = 6.7$  Hz, 3H) ppm;  $^{13}\text{C NMR}$  (125 MHz,  $\text{CDCl}_3$ )  $\delta$  207.0, 151.12, 151.09, 128.6, 125.9, 110.6, 108.4, 66.8, 62.1, 56.2, 56.1, 53.1, 41.9, 34.6, 32.7, 26.5, 23.4, 19.6, 19.5 ppm; IR  $\nu_{\max}$  2956, 1265, 1207, 1151, 1068, 1031, 740, 704  $\text{cm}^{-1}$ ; HRMS–ESI ( $m/z$ ):  $[\text{M}+\text{Na}]^+$  calcd for  $\text{C}_{19}\text{H}_{26}\text{O}_4\text{Na}$ , 341.1723; found, 341.1709; Enantiomeric excess: 91%, determined by HPLC (Daicel Chiralpak IG, hexane/isopropanol = 92/8, flow rate 0.8 mL/min,  $T = 25$  °C, 230 nm):  $t_{\text{R}} = 20.294$  min (major),  $t_{\text{R}} = 23.006$  min (minor).

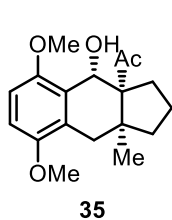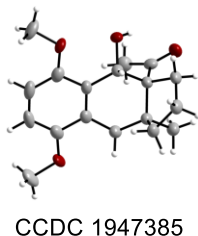

**35** (72.1 mg) was prepared according to general procedure in 79% yield. The reaction time was 90 min under 366 nm light. The product was isolated through silica gel column chromatography (6% to 20% ethyl acetate-petroleum ether) as a yellow solid:  $R_f = 0.26$  (20% ethyl acetate-petroleum ether); m.p. 76 - 78 °C;  $[\alpha]_{\text{D}}^{20} +47.3$  (c 0.50, DCM); and it was recrystallized from ethyl acetate /hexane ( $V/V = 1/4$ ) at 25 °C, to obtain colorless crystals, CCDC (1947385).  $^1\text{H NMR}$  (500 MHz,  $\text{CDCl}_3$ )  $\delta$  6.75 (d,  $J = 8.9$  Hz, 1H), 6.73 (d,  $J = 8.8$  Hz, 1H), 4.98 (s, 1H), 4.36 (d,  $J = 1.8$  Hz, 1H), 3.86 (s, 3H), 3.81 (s, 3H), 2.81 (d,  $J = 18.1$  Hz, 1H), 2.71 (d,  $J = 18.1$  Hz, 1H), 2.55 – 2.45 (m, 1H), 2.14 (s, 3H), 2.04 – 1.94 (m, 1H), 1.83 – 1.72 (m, 1H), 1.71 – 1.56 (m, 3H), 1.05 (s, 3H) ppm;  $^{13}\text{C NMR}$  (125 MHz,  $\text{CDCl}_3$ )  $\delta$  210.8, 151.6, 151.2, 126.3, 125.7, 108.6, 107.7, 70.6, 63.2, 55.61, 55.57, 42.8, 38.9, 33.3, 31.9, 29.7, 24.7, 18.9 ppm; IR  $\nu_{\max}$  3053, 1697, 1421, 1267, 742  $\text{cm}^{-1}$ ; HRMS–EI ( $m/z$ ):  $[\text{M}]^+$  calcd for  $\text{C}_{18}\text{H}_{24}\text{O}_4$ , 304.1675; found, 304.1679; Enantiomeric excess: 88%, determined by HPLC (Daicel Chiralpak IG, hexane/isopropanol = 70/30, flow rate 0.8 mL/min,  $T = 25$  °C, 230 nm):  $t_{\text{R}} = 11.803$  min (major),  $t_{\text{R}} = 14.162$  min (minor).

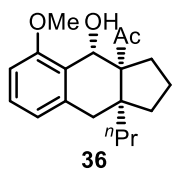

**36** (77 mg, d.r. = 16 : 1) was prepared according to general procedure in 85% yield. The reaction time was 90 min under 366 nm light. The product was isolated through silica gel column chromatography (6% to 20% ethyl acetate-petroleum ether) as a white solid:  $R_f = 0.4$  (20% ethyl acetate-petroleum ether); m.p. 100 - 102 °C;  $[\alpha]_{\text{D}}^{20} +98.4$  (c 0.30, DCM);  $^1\text{H NMR}$  (500 MHz,  $\text{CDCl}_3$ )  $\delta$  7.18 (t,  $J = 7.9$  Hz, 1H), 6.76 (d,  $J = 8.0$  Hz, 1H), 6.74 (d,  $J = 8.5$  Hz, 1H), 5.10 (s, 1H), 4.28 (d,  $J = 1.9$  Hz, 1H), 3.86 (s, 3H), 3.06 (d,  $J = 16.6$  Hz, 1H), 2.66 (d,  $J = 16.6$  Hz, 1H), 2.38 – 2.29 (m, 1H), 2.18 (s, 3H), 1.84 (ddd,  $J = 11.9, 8.6, 5.4$  Hz, 1H), 1.76 (ddd,  $J = 13.5, 9.4, 3.6$  Hz, 1H), 1.72 – 1.60 (m, 1H), 1.53 – 1.43 (m, 3H), 1.39 – 1.17 (m, 3H), 0.90 (t,  $J = 6.9$  Hz, 3H) ppm;  $^{13}\text{C NMR}$  (125 MHz,  $\text{CDCl}_3$ )  $\delta$  212.7, 157.3, 137.9, 128.3, 124.8, 121.5, 108.1, 70.2, 64.6, 55.4, 47.6, 39.3, 37.6, 35.9, 32.6, 30.2, 20.4, 17.6, 15.0 ppm; IR  $\nu_{\max}$  2956, 1591, 1471, 1375, 1280, 1180, 744, 744  $\text{cm}^{-1}$ ; HRMS–ESI ( $m/z$ ):  $[\text{M}+\text{Na}]^+$  calcd for  $\text{C}_{19}\text{H}_{26}\text{O}_3\text{Na}$ , 325.1774; found, 325.1762; Enantiomeric excess: 91%, determined by HPLC (Daicel Chiralpak IG, hexane/isopropanol = 70/30, flow rate 0.8 mL/min,  $T = 25$  °C, 230 nm):  $t_{\text{R}} = 8.839$  min (minor),  $t_{\text{R}} = 11.127$  min (major).

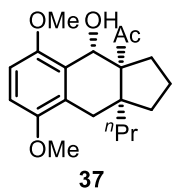

**37** (74.3 mg) was prepared according to general procedure in 75% yield. The reaction time was 90 min under 366 nm light. The product was isolated through silica gel column chromatography (6% to 20% ethyl acetate-petroleum ether) as a white solid:  $R_f = 0.36$  (20% ethyl acetate-petroleum ether); m.p. 94 - 96 °C;  $[\alpha]_D^{20} +43.7$  (c 0.36, DCM);  $^1\text{H NMR}$  (500 MHz,  $\text{CDCl}_3$ )  $\delta$  6.73 (d,  $J = 9.0$  Hz, 1H), 6.70 (d,  $J = 9.0$  Hz, 1H), 4.99 (s, 1H), 4.31 (d,  $J = 1.9$  Hz, 1H), 3.84 (s, 3H), 3.79 (s, 3H), 2.79 (d,  $J = 18.0$  Hz, 1H), 2.69 (d,  $J = 18.0$  Hz, 1H), 2.49 - 2.38 (m, 1H), 2.13 (s, 3H), 1.94 - 1.79 (m, 2H), 1.75 - 1.64 (m, 1H), 1.61 - 1.56 (m, 1H), 1.51 - 1.42 (m, 3H), 1.38 - 1.30 (m, 1H), 1.19 - 1.09 (m, 1H), 0.90 (t,  $J = 6.8$  Hz, 3H) ppm;  $^{13}\text{C NMR}$  (125 MHz,  $\text{CDCl}_3$ )  $\delta$  211.3, 151.5, 151.3, 126.1, 125.9, 108.7, 107.6, 70.6, 64.1, 55.7, 55.6, 46.2, 38.5, 34.6, 31.9, 30.3, 29.9, 19.2, 17.3, 15.0 ppm; IR  $\nu_{\text{max}}$  3055, 1697, 1241, 1267, 1105, 804  $\text{cm}^{-1}$ ; HRMS-EI ( $m/z$ ):  $[\text{M}]^+$  calcd for  $\text{C}_{20}\text{H}_{28}\text{O}_4$ , 332.1988; found, 332.1982; Enantiomeric excess: 94%, determined by HPLC (Daicel Chiralpak IG, hexane/isopropanol = 70/30, flow rate 0.8 mL/min, T = 25 °C, 230 nm):  $t_R = 9.967$  min (minor),  $t_R = 12.793$  min (major).

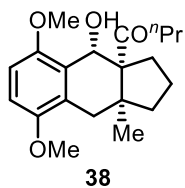

**38** (72.1 mg) was prepared according to general procedure in 72% yield. The reaction time was 90 min under 366 nm light. The product was isolated through silica gel column chromatography (6% to 20% ethyl acetate-petroleum ether) as a yellow solid:  $R_f = 0.52$  (20% ethyl acetate-petroleum ether); m.p. 79 - 81 °C;  $[\alpha]_D^{20} +55.4$  (c 0.14, DCM);  $^1\text{H NMR}$  (500 MHz,  $\text{CDCl}_3$ )  $\delta$  6.72 (d,  $J = 8.9$  Hz, 1H), 6.69 (d,  $J = 8.9$  Hz, 1H), 4.93 (s, 1H), 4.32 (d,  $J = 1.8$  Hz, 1H), 3.83 (s, 3H), 3.79 (s, 3H), 2.74 (d,  $J = 2.1$  Hz, 2H), 2.53 - 2.44 (m, 2H), 2.44 - 2.35 (m, 1H), 2.01 (m, 1H), 1.82 - 1.71 (m, 1H), 1.70 - 1.63 (m, 1H), 1.58 - 1.53 (m, 3H), 1.23 (d,  $J = 17.6$  Hz, 1H), 1.02 (s, 3H), 0.86 (t,  $J = 7.4$  Hz, 3H) ppm;  $^{13}\text{C NMR}$  (125 MHz,  $\text{CDCl}_3$ )  $\delta$  213.1, 151.5, 151.3, 126.3, 126.1, 108.6, 107.6, 71.0, 62.6, 55.7, 55.6, 43.9, 43.1, 38.7, 33.4, 31.8, 24.7, 19.1, 17.0, 13.9 ppm; IR  $\nu_{\text{max}}$  3736, 3055, 1697, 1421, 1267, 1107  $\text{cm}^{-1}$ ; HRMS-EI ( $m/z$ ):  $[\text{M}]^+$  calcd for  $\text{C}_{20}\text{H}_{28}\text{O}_4$ , 332.1988; found, 332.1990; Enantiomeric excess: 94%, determined by HPLC (Daicel Chiralpak IG, hexane/isopropanol = 70/30, flow rate 0.8 mL/min, T = 25 °C, 230 nm):  $t_R = 8.652$  min (minor),  $t_R = 11.045$  min (major).

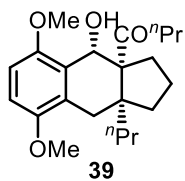

**39** (52 mg) was prepared according to general procedure in 46% yield. The reaction time was 90 min under 366 nm light. The product was isolated through silica gel column chromatography (6% to 20% ethyl acetate-petroleum ether) as a colorless oil:  $R_f = 0.55$  (20% ethyl acetate-petroleum ether);  $[\alpha]_D^{20} +48.5$  (c 0.20, DCM);  $^1\text{H NMR}$  (500 MHz,  $\text{CDCl}_3$ )  $\delta$  6.71 (d,  $J = 8.9$  Hz, 1H), 6.68 (d,  $J = 8.9$  Hz, 1H), 4.97 (d,  $J = 1.7$  Hz, 1H), 4.30 (d,  $J = 1.8$  Hz, 1H), 3.82 (s, 3H), 3.78 (s, 3H), 2.76 (d,  $J = 18.0$  Hz, 1H), 2.71 (d,  $J = 18.0$  Hz, 1H), 2.53 - 2.45 (m, 1H), 2.41 (ddt,  $J = 11.1, 8.4, 5.7$  Hz, 2H), 1.98 - 1.90 (m, 1H), 1.86 - 1.77 (m, 1H), 1.74 - 1.66 (m, 1H), 1.64 - 1.54 (m, 3H), 1.48 - 1.39 (m, 3H), 1.38 - 1.30 (m, 1H), 1.17 - 1.09 (m, 1H), 0.89 (t,  $J = 6.9$  Hz, 3H), 0.86 (t,  $J = 7.4$  Hz, 3H) ppm;  $^{13}\text{C NMR}$  (125 MHz,  $\text{CDCl}_3$ )  $\delta$  213.6, 151.4, 151.3, 126.04, 125.99, 108.6, 107.4, 70.8, 63.4, 55.6, 55.5, 46.4, 44.0, 38.3, 34.2, 31.7, 30.2, 19.3, 17.2, 17.0, 15.0, 13.8 ppm; IR  $\nu_{\text{max}}$  1701, 1465, 1371, 1180, 1141, 744, 701  $\text{cm}^{-1}$ ; HRMS-ESI ( $m/z$ ):  $[\text{M}+\text{Na}]^+$  calcd for  $\text{C}_{22}\text{H}_{32}\text{O}_4\text{Na}$ , 383.2193; found, 383.2178; Enantiomeric excess: 88%, determined by HPLC (Daicel Chiralpak IG, hexane/isopropanol = 85/15, flow rate 0.8 mL/min, T = 25 °C, 230 nm):  $t_R = 12.014$  min (minor),  $t_R = 13.248$  min (major).

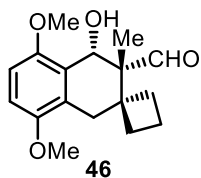

**46** (48 mg, d.r. = 9:1) was prepared according to general procedure in 55% yield. Ligand **L10** (0.24 mmol, 0.8 equiv.) was used. The reaction time was 90 min under 366 nm light. The product was isolated through silica gel column chromatography (6% to 20% ethyl acetate-petroleum ether) as a white solid:  $R_f = 0.35$  (20% ethyl acetate-petroleum ether); m.p. 100 - 102 °C;  $[\alpha]_D^{20} +16.6$  (c 0.32, DCM);  $^1\text{H NMR}$  (500 MHz,  $\text{CDCl}_3$ )  $\delta$  10.07 (s, 1H), 6.74 (d,  $J = 8.9$  Hz, 1H), 6.72 (d,  $J = 9.1$  Hz, 1H), 4.88 (d,  $J = 1.8$  Hz, 1H), 3.84 (s, 3H), 3.81 (s, 3H), 3.54 (d,  $J = 2.4$  Hz, 1H), 2.99 (d,  $J = 18.0$  Hz, 1H), 2.85 (d,  $J = 18.0$  Hz, 1H), 2.64 (dt,  $J = 11.9, 9.1$  Hz, 1H), 2.26 (dt,  $J = 11.9, 9.1$  Hz, 1H), 2.11 - 2.01 (m, 1H), 1.93 - 1.83 (m, 1H), 1.71 - 1.63 (m, 1H), 1.61 - 1.53 (m, 1H), 1.14 (s, 3H) ppm;  $^{13}\text{C NMR}$  (125 MHz,  $\text{CDCl}_3$ )  $\delta$  207.4, 151.63, 151.59, 126.5, 124.9, 108.8, 107.8, 70.7, 55.6, 55.5, 52.2, 40.9, 34.5, 29.3, 28.5, 15.6, 13.8 ppm; IR  $\nu_{\text{max}}$  2966, 1722, 1456, 1267, 744, 704  $\text{cm}^{-1}$ ; HRMS-ESI ( $m/z$ ):  $[\text{M}+\text{Na}]^+$  calcd for  $\text{C}_{17}\text{H}_{22}\text{O}_4\text{Na}$ , 313.1410; found, 313.1407; Enantiomeric excess: 91%, determined by HPLC (Daicel Chiralpak IG, hexane/isopropanol = 85/15, flow rate 0.8 mL/min, T = 25 °C, 230 nm):  $t_R = 15.752$  min (major),  $t_R = 21.974$  min (minor).



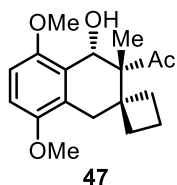

**47** (68 mg, d.r. = 6:1) was prepared according to general procedure in 75% yield. The reaction time was 90 min under 366 nm light. The product was isolated through silica gel column chromatography (6% to 20% ethyl acetate-petroleum ether) as a white solid:  $R_f = 0.2$  (20% ethyl acetate-petroleum ether); m.p. 152 - 154 °C;  $[\alpha]_D^{20} +12.9$  (c 0.32, DCM);  $^1\text{H NMR}$  (500 MHz,  $\text{CDCl}_3$ )  $\delta$  6.73 (d,  $J = 9.0$  Hz 1H), 6.71 (d,  $J = 9.0$  Hz 1H), 4.94 (d,  $J = 2.4$  Hz, 1H), 3.84 (s 3H), 3.81 (s, 3H), 3.32 (d,  $J = 3.5$  Hz, 1H), 2.97 (d,  $J = 18.1$  Hz, 1H), 2.73 (d,  $J = 18.1$  Hz, 1H), 2.70 (ddd,  $J = 11.9, 9.9, 8.1$  Hz, 1H), 2.56 (ddd,  $J = 11.9, 9.9, 8.1$  Hz, 1H), 2.25 (s, 3H), 2.09 – 1.94 (m, 2H), 1.54 – 1.45 (m, 2H), 1.18 (s, 3H) ppm;  $^{13}\text{C NMR}$  (125 MHz,  $\text{CDCl}_3$ )  $\delta$  211.5, 151.6, 151.5, 126.8, 125.2, 108.7, 107.8, 70.8, 55.62, 55.58, 54.8, 40.6, 35.4, 29.3, 29.0, 28.1, 16.5, 15.3 ppm; IR  $\nu_{\text{max}}$  2958, 1722, 1469, 1265, 1085, 1014, 746  $\text{cm}^{-1}$ ; HRMS-ESI ( $m/z$ ):  $[\text{M}+\text{Na}]^+$  calcd for  $\text{C}_{18}\text{H}_{24}\text{O}_4\text{Na}$ , 327.1567; found, 327.1563; Enantiomeric excess: 89%, determined by HPLC (Daicel Chiralpak IG, hexane/isopropanol = 95/5, flow rate 0.8 mL/min, T = 25 °C, 230 nm):  $t_R = 30.903$  min (major),  $t_R = 32.791$  min (minor).

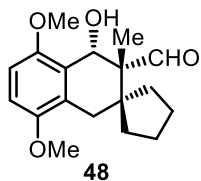

**48** (55 mg) was prepared according to general procedure in 60% yield. The reaction time was 90 min under 366 nm light. The product was isolated through silica gel column chromatography (6% to 20% ethyl acetate-petroleum ether) as a colorless oil:  $R_f = 0.4$  (20% ethyl acetate-petroleum ether);  $[\alpha]_D^{20} +19.0$  (c 0.20, DCM);  $^1\text{H NMR}$  (400 MHz,  $\text{CDCl}_3$ )  $\delta$  9.91 (s, 1H), 6.73 (s, 2H), 4.88 (d,  $J = 2.1$  Hz, 1H), 3.91 (d,  $J = 2.1$  Hz, 1H), 3.85 (s, 3H), 3.78 (s, 3H), 2.66 (d,  $J = 18.1$  Hz, 1H), 2.57 (d,  $J = 18.1$  Hz, 1H), 2.06 (ddd,  $J = 13.3, 8.3, 6.8$  Hz, 1H), 1.75 – 1.56 (m, 5H), 1.37 – 1.25 (m, 2H), 1.20 (s, 3H) ppm;  $^{13}\text{C NMR}$  (100 MHz,  $\text{CDCl}_3$ )  $\delta$  207.4, 151.7, 151.5, 126.8, 125.8, 108.7, 107.8, 72.1, 55.6, 55.52, 55.49, 53.3, 45.9, 34.7, 34.4, 25.6, 24.8, 14.3 ppm; IR  $\nu_{\text{max}}$  1701, 1371, 1282, 1267, 1180, 1141, 902, 844, 744, 707  $\text{cm}^{-1}$ ; HRMS-ESI ( $m/z$ ):  $[\text{M}+\text{Na}]^+$  calcd for  $\text{C}_{18}\text{H}_{24}\text{O}_4\text{Na}$ , 327.1567; found, 327.1561; Enantiomeric excess: 92%, determined by HPLC (Daicel Chiralpak IG, hexane/isopropanol = 70/30, flow rate 0.8 mL/min, T = 25 °C, 230 nm):  $t_R = 12.605$  min (major),  $t_R = 14.471$  min (minor).

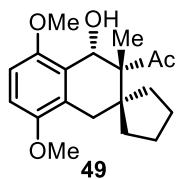

**49** (90 mg, d.r. = 10:1) was prepared according to general procedure in 94% yield. The reaction time was 90 min under 366 nm light. The product was isolated through silica gel column chromatography (6% to 20% ethyl acetate-petroleum ether) as a white solid:  $R_f = 0.3$  (20% ethyl acetate-petroleum ether); m.p. 132 – 134 °C;  $[\alpha]_D^{20} +12.9$  (c 0.32, DCM);  $^1\text{H NMR}$  (400 MHz,  $\text{CDCl}_3$ )  $\delta$  6.71 (s, 2H), 5.00 (d,  $J = 3.2$  Hz, 1H), 3.86 (s, 3H), 3.78 (s, 3H), 3.24 (d,  $J = 3.2$  Hz, 1H), 2.70 (d,  $J = 18.1$  Hz, 1H), 2.40 (d,  $J = 18.1$  Hz, 1H), 2.26 (s, 3H), 2.13 – 1.99 (m, 2H), 1.84 – 1.60 (m, 5H), 1.30 – 1.25 (m, 1H), 1.23 (s, 3H) ppm;  $^{13}\text{C NMR}$  (125 MHz,  $\text{CDCl}_3$ )  $\delta$  210.9, 151.7, 151.4, 126.7, 126.3, 108.6, 107.3, 71.6, 55.8, 55.6, 55.5, 45.2, 36.3, 35.6, 34.2, 28.2, 26.0, 25.0, 18.6 ppm; IR  $\nu_{\text{max}}$  2964, 1701, 1371, 1282, 1265, 1180, 1141, 902, 802, 744, 707  $\text{cm}^{-1}$ ; HRMS-ESI ( $m/z$ ):  $[\text{M}+\text{Na}]^+$  calcd for  $\text{C}_{19}\text{H}_{26}\text{O}_4\text{Na}$ , 341.1723; found, 341.1720; Enantiomeric excess: 90%, determined by HPLC (Daicel Chiralpak IG, hexane/isopropanol = 95/5, flow rate 0.8 mL/min, T = 25 °C, 230 nm):  $t_R = 28.209$  min (minor),  $t_R = 30.850$  min (major).

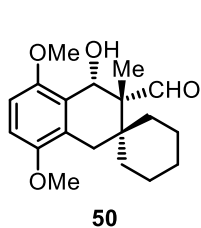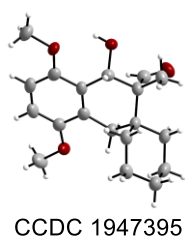

**50** (88 mg, d.r. = 10:1) was prepared according to general procedure in 92% yield. The reaction time was 90 min under 366 nm light. The product was isolated through silica gel column chromatography (6% to 20% ethyl acetate-petroleum ether) as a white foam:  $R_f = 0.4$  (20% ethyl acetate-petroleum ether);  $[\alpha]_D^{20} +5.71$  (c 0.80, DCM); and it was recrystallized from DCM/hexane (V/V = 1/4) at 25 °C, to obtain colorless crystals, CCDC (1947395).  $^1\text{H NMR}$  (400 MHz,  $\text{CDCl}_3$ )  $\delta$  9.84 (s, 1H), 6.76 (d,  $J = 8.8$  Hz, 1H), 6.74 (d,  $J = 8.8$  Hz, 1H), 4.86 (s, 1H), 4.15 (d,  $J = 1.7$  Hz, 1H), 3.86 (s, 3H), 3.81 (s, 3H), 3.26 (d,  $J = 18.5$  Hz, 1H), 2.34 (d,  $J = 18.8$  Hz, 1H), 1.70 – 1.63 (m, 2H), 1.54 (dt,  $J = 10.1, 3.1$  Hz, 2H), 1.45 – 1.33 (m, 5H), 1.26 (s, 3H), 1.18 – 1.06 (m, 1H) ppm;  $^{13}\text{C NMR}$  (125 MHz,  $\text{CDCl}_3$ )  $\delta$  207.3, 151.7, 151.5, 126.3, 125.3, 108.9, 107.9, 71.7, 55.7, 55.5, 54.9, 37.9, 32.1, 28.8, 27.9, 26.0, 21.1, 21.0, 12.2 ppm; IR  $\nu_{\text{max}}$  2935, 1722, 1479, 1265, 1082, 1024, 744  $\text{cm}^{-1}$ ; HRMS-ESI ( $m/z$ ):  $[\text{M}+\text{Na}]^+$  calcd for  $\text{C}_{19}\text{H}_{26}\text{O}_4\text{Na}$ , 341.1723; found, 341.1720; Enantiomeric excess: 95%, determined by HPLC (Daicel Chiralpak IG, hexane/isopropanol = 84/16, flow rate 0.8 mL/min, T = 25 °C, 230 nm):  $t_R = 19.210$  min (minor),  $t_R = 20.349$  min (major).

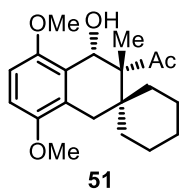

**51** (46 mg, d.r. = 5.2:1) was prepared according to general procedure in 46% yield. The reaction time was 90 min under 366 nm light. The product was isolated through silica gel column chromatography (6% to 20% ethyl acetate-petroleum ether) as a white solid:  $R_f = 0.35$  (20% ethyl acetate-petroleum ether);  $^1\text{H NMR}$  (500 MHz,  $\text{CDCl}_3$ )  $\delta$  6.73 (d,  $J = 8.9$  Hz, 1H), 6.71 (d,  $J = 9.0$  Hz, 1H), 4.90 (d,  $J = 1.7$  Hz, 1H), 3.99 (d,  $J = 2.2$  Hz, 1H), 3.84 (s, 3H), 3.80 (s, 3H), 2.99 (d,  $J = 18.3$  Hz, 1H), 2.54 (d,  $J = 18.3$  Hz, 1H), 2.16 (s, 3H), 1.85 – 1.74 (m, 1H), 1.70 – 1.65 (m, 2H), 1.55 – 1.50 (m, 2H), 1.48 – 1.43 (m, 2H), 1.38 (s, 3H), 1.34 (d,  $J = 2.7$  Hz, 1H), 1.28 – 1.23 (m, 1H), 1.22 – 1.13 (m, 1H) ppm;  $^{13}\text{C NMR}$  (125 MHz,  $\text{CDCl}_3$ )  $\delta$  212.1, 151.42, 151.37, 126.8, 126.0, 108.7, 107.5, 72.6, 57.2, 55.7, 55.5, 37.6, 31.4, 30.7, 29.6, 27.9, 25.9, 21.63, 21.55, 17.6 ppm; IR  $\nu_{\text{max}}$ : 2937, 1602, 1465, 1265, 1255, 1141, 1093, 742, 705  $\text{cm}^{-1}$ ; HRMS–ESI ( $m/z$ ):  $[\text{M}+\text{Na}]^+$  calcd for  $\text{C}_{20}\text{H}_{28}\text{O}_4\text{Na}$ , 355.1880; found, 355.1873; Enantiomeric excess: 83%, determined by HPLC (Daicel Chiralpak IG, hexane/isopropanol = 95/5, flow rate 0.8 mL/min,  $T = 25$  °C, 230 nm):  $t_R = 34.910$  min (minor),  $t_R = 38.588$  min (major).

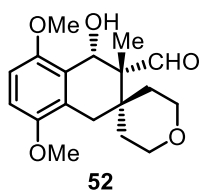

**52** (85 mg) was prepared according to general procedure in 89% yield. Ligand **L10** (0.24 mmol, 0.8 equiv.) was used. The reaction time was 90 min under 366 nm light. The product was isolated through silica gel column chromatography (6% to 20% ethyl acetate-petroleum ether) as a white solid:  $R_f = 0.4$  (20% ethyl acetate-petroleum ether); m.p. 82 – 84 °C;  $[\alpha]_{\text{D}}^{20} +6.61$  (c 1.15, DCM);  $^1\text{H NMR}$  (400 MHz,  $\text{CDCl}_3$ )  $\delta$  9.91 (s, 1H), 6.76 (s, 2H), 4.87 (d,  $J = 1.4$  Hz, 1H), 4.02 (d,  $J = 2.0$  Hz, 1H), 3.86 (s, 3H), 3.81 (s, 3H), 3.78 – 3.59 (m, 4H), 3.24 (d,  $J = 18.5$  Hz, 1H), 2.58 (d,  $J = 18.4$  Hz, 1H), 2.15 (ddd,  $J = 14.0, 12.6, 5.3$  Hz, 1H), 1.89 (ddd,  $J = 14.0, 12.6, 5.3$  Hz, 1H), 1.29 – 1.14 (m, 5H) ppm;  $^{13}\text{C NMR}$  (100 MHz,  $\text{CDCl}_3$ )  $\delta$  206.7, 151.7, 151.4, 126.0, 124.3, 109.0, 108.1, 71.2, 63.3, 62.9, 55.6, 54.0, 35.5, 31.7, 29.7, 27.5, 12.5 ppm; IR  $\nu_{\text{max}}$ : 1718, 1481, 1390, 1257, 1083, 798, 744, 698, 651  $\text{cm}^{-1}$ ; HRMS–ESI ( $m/z$ ):  $[\text{M}+\text{Na}]^+$  calcd for  $\text{C}_{18}\text{H}_{24}\text{O}_5\text{Na}$ , 343.1516; found, 343.1512; Enantiomeric excess: 88%, determined by HPLC (Daicel Chiralpak IG, hexane/isopropanol = 70/30, flow rate 0.8 mL/min,  $T = 25$  °C, 230 nm):  $t_R = 18.671$  min (major),  $t_R = 21.838$  min (minor).

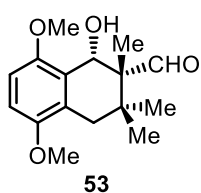

**53** (47 mg) was prepared according to general procedure in 56% yield. The reaction time was 90 min under 366 nm light. The product was isolated through silica gel column chromatography (6% to 20% ethyl acetate-petroleum ether) as a white solid:  $R_f = 0.35$  (20% ethyl acetate-petroleum ether); m.p. 78 – 80 °C;  $[\alpha]_{\text{D}}^{20} +9.68$  (c 0.28, DCM);  $^1\text{H NMR}$  (500 MHz,  $\text{CDCl}_3$ )  $\delta$  9.81 (s, 1H), 6.75 (s, 2H), 4.88 (s, 1H), 4.20 (d,  $J = 1.7$  Hz, 1H), 3.87 (s, 3H), 3.80 (s, 3H), 2.65 (d,  $J = 18.2$  Hz, 1H), 2.56 (d,  $J = 18.2$  Hz, 1H), 1.24 (s, 3H), 1.04 (s, 3H), 0.94 (s, 3H) ppm;  $^{13}\text{C NMR}$  (100 MHz,  $\text{CDCl}_3$ )  $\delta$  207.0, 151.8, 151.4, 126.3, 125.7, 108.8, 108.0, 72.1, 55.62, 55.57, 54.1, 36.2, 35.1, 25.4, 24.3, 13.0 ppm; IR  $\nu_{\text{max}}$ : 1730, 1602, 1477, 1371, 1280, 1180, 1141, 742, 705  $\text{cm}^{-1}$ ; HRMS–ESI ( $m/z$ ):  $[\text{M}+\text{Na}]^+$  calcd for  $\text{C}_{16}\text{H}_{22}\text{O}_4\text{Na}$ , 301.1410; found, 301.1401; Enantiomeric excess: 91%, determined by HPLC (Daicel Chiralpak IG, hexane/isopropanol = 70/30, flow rate 0.8 mL/min,  $T = 25$  °C, 230 nm):  $t_R = 10.040$  min (major),  $t_R = 14.544$  min (minor).

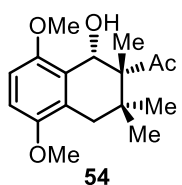

**54** (22 mg, d.r. = 10:1) was prepared according to general procedure in 25% yield. The reaction time was 90 min under 366 nm light. The product was isolated through silica gel column chromatography (6% to 20% ethyl acetate-petroleum ether) as a white solid:  $R_f = 0.35$  (20% ethyl acetate-petroleum ether); m.p. 105 – 107 °C;  $[\alpha]_{\text{D}}^{20} +33.6$  (c 0.32, DCM);  $^1\text{H NMR}$  (400 MHz,  $\text{CDCl}_3$ )  $\delta$  6.72 (s, 2H), 4.95 (d,  $J = 1.6$  Hz, 1H), 3.86 (s, 3H), 3.79 (s, 3H), 2.57 (d,  $J = 18.0$  Hz, 1H), 2.50 (d,  $J = 18.0$  Hz, 1H), 2.20 (s, 3H), 1.31 (s, 3H), 1.11 (s, 3H), 1.07 (s, 3H) ppm;  $^{13}\text{C NMR}$  (100 MHz,  $\text{CDCl}_3$ )  $\delta$  211.5, 151.6, 151.2, 126.5, 126.2, 108.7, 107.4, 72.5, 55.9, 55.6, 55.5, 37.3, 34.4, 29.6, 25.6, 25.4, 18.3 ppm; IR  $\nu_{\text{max}}$ : 2358, 2330, 1274, 1267, 763, 748, 705  $\text{cm}^{-1}$ ; HRMS–ESI ( $m/z$ ):  $[\text{M}+\text{Na}]^+$  calcd for  $\text{C}_{17}\text{H}_{24}\text{O}_4\text{Na}$ , 315.1567; found, 315.1568; Enantiomeric excess: 89%, determined by HPLC (Daicel Chiralpak IG, hexane/isopropanol = 70/30, flow rate 0.8 mL/min,  $T = 25$  °C, 230 nm):  $t_R = 9.179$  min (major),  $t_R = 10.041$  min (minor).

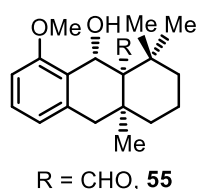

**55** (74 mg) was prepared according to general procedure in 82% yield. The reaction time was 90 min under 366 nm light. The product was isolated through silica gel column chromatography (6% to 20% ethyl acetate-petroleum ether) as a white solid:  $R_f = 0.25$  (20% ethyl acetate-petroleum ether); m.p. 115 – 117 °C;  $[\alpha]_D^{20} +1.40$  (c 0.88, DCM);  $^1\text{H NMR}$  (400 MHz,  $\text{CDCl}_3$ )  $\delta$  10.09 (s, 1H), 7.19 (t,  $J = 7.9$  Hz, 1H), 6.74 (d,  $J = 8.3$  Hz, 1H), 6.72 (d,  $J = 7.9$  Hz, 1H), 5.51 (d,  $J = 3.2$  Hz, 1H), 3.91 (s, 3H), 3.29 (d,  $J = 18.1$  Hz, 1H), 3.12 (d,  $J = 3.3$  Hz, 1H), 2.37 (d,  $J = 17.8$  Hz, 1H), 2.30 – 2.36 (m, 1H), 1.80 – 1.68 (m, 1H), 1.64 – 1.53 (m, 2H), 1.35 – 1.28 (m, 1H), 1.28 – 1.20 (m, 1H), 1.17 (s, 3H), 1.12 (s, 3H), 0.72 (s, 3H) ppm;  $^{13}\text{C NMR}$  (100 MHz,  $\text{CDCl}_3$ )  $\delta$  207.1 (d,  $J = 2.0$  Hz, 1C), 156.9, 136.6, 128.2, 126.4, 121.4, 107.5, 64.6 (d,  $J = 4.7$  Hz, 2C), 57.3, 55.5 (d,  $J = 5.5$  Hz, 2C), 41.7, 38.2, 36.8, 36.7, 33.8, 28.7, 28.7, 25.8, 18.5 ppm; IR  $\nu_{\text{max}}$  2958, 1716, 1595, 1265, 744  $\text{cm}^{-1}$ ; HRMS-ESI ( $m/z$ ):  $[\text{M}+\text{Na}]^+$  calcd for  $\text{C}_{19}\text{H}_{26}\text{O}_3\text{Na}$ , 325.1774; found, 325.1765; Enantiomeric excess: 97%, determined by HPLC (Daicel Chiralpak IG, hexane/isopropanol = 70/30, flow rate 0.8 mL/min, T = 25 °C, 230 nm):  $t_R = 9.100$  min (major),  $t_R = 9.998$  min (minor).

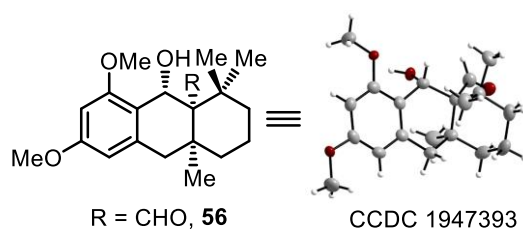

**56** (90 mg) was prepared according to general procedure in 90% yield. The reaction time was 90 min under 366 nm light. The product was isolated through silica gel column chromatography (6% to 20% ethyl acetate-petroleum ether) as a white solid:  $R_f = 0.25$  (20% ethyl acetate-petroleum ether); m.p. 47 - 49 °C;  $[\alpha]_D^{20} +4.78$  (c 0.74, DCM); and it was recrystallized from DCM /hexane (V/V = 1/4) at 25 °C, to obtain colorless crystals, CCDC (1947393).  $^1\text{H NMR}$  (400 MHz,  $\text{CDCl}_3$ )  $\delta$  10.07 (s, 1H), 6.33 (d,  $J = 2.3$  Hz, 1H), 6.21 (d,  $J = 2.3$  Hz, 1H), 5.44 (s, 1H), 3.88 (s, 3H), 3.78 (s, 3H), 3.26 (d,  $J = 18.1$  Hz, 1H), 2.97 (s, 1H), 2.40 – 2.28 (m, 2H), 1.73 (d,  $J = 13.4$  Hz, 1H), 1.60 (dd,  $J = 6.9, 3.3$  Hz, 1H), 1.29 (dt,  $J = 14.5, 3.3$  Hz, 1H), 1.25 – 1.20 (m, 1H), 1.17 (s, 3H), 1.10 (s, 3H), 0.72 (s, 3H) ppm;  $^{13}\text{C NMR}$  (100 MHz,  $\text{CDCl}_3$ )  $\delta$  207.2, 159.8, 158.1, 137.4, 119.4, 104.0, 96.5, 64.4, 57.4, 55.5, 55.2, 42.3, 38.2, 36.8, 36.7, 33.9, 28.9, 28.7, 25.8, 18.5 ppm; IR  $\nu_{\text{max}}$  1371, 1282, 1180, 1141, 904, 844, 746, 707  $\text{cm}^{-1}$ ; HRMS-ESI ( $m/z$ ):  $[\text{M}+\text{Na}]^+$  calcd for  $\text{C}_{20}\text{H}_{28}\text{O}_4\text{Na}$ , 355.1880; found, 355.1869; Enantiomeric excess: 98%, determined by HPLC (Daicel Chiralpak IG, hexane/isopropanol = 70/30, flow rate 0.8 mL/min, T = 25 °C, 230 nm):  $t_R = 12.526$  min (major),  $t_R = 16.350$  min (minor).

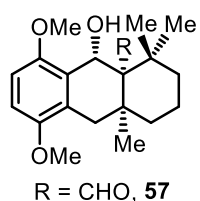

**57** (77 mg) was prepared according to general procedure in 77% yield. The reaction time was 90 min under 366 nm light. The product was isolated through silica gel column chromatography (6% to 20% ethyl acetate-petroleum ether) as a yellow solid:  $R_f = 0.45$  (20% ethyl acetate-petroleum ether); m.p. 109 – 111 °C;  $[\alpha]_D^{20} +10.2$  (c 0.87, DCM);  $^1\text{H NMR}$  (400 MHz,  $\text{CDCl}_3$ )  $\delta$  10.09 (s, 1H), 6.70 (s, 2H), 5.49 (d,  $J = 3.1$  Hz, 1H), 3.87 (s, 3H), 3.79 (s, 3H), 3.18 (d,  $J = 3.3$  Hz, 1H), 2.95 (d,  $J = 18.9$  Hz, 1H), 2.43 (d,  $J = 18.9$  Hz, 1H), 2.36 (td,  $J = 13.5, 4.1$  Hz, 1H), 1.85 – 1.71 (m, 1H), 1.63 – 1.53 (m, 2H), 1.39 (dt,  $J = 13.7, 3.2$  Hz, 1H), 1.26 – 1.19 (m, 1H), 1.15 (s, 3H), 1.09 (s, 3H), 0.67 (s, 3H) ppm;  $^{13}\text{C NMR}$  (100 MHz,  $\text{CDCl}_3$ )  $\delta$  207.3 (d,  $J = 2.0$  Hz, 1C), 151.2, 150.8, 127.5, 125.6, 108.4, 107.2, 64.6 (d,  $J = 3.0$  Hz, 1C), 56.9, 55.7 (d,  $J = 3.3$  Hz, 1C), 55.5 (d,  $J = 3.1$  Hz, 1C), 38.2, 36.83, 36.78, 36.4, 33.2, 29.1, 28.6, 25.8, 18.6 ppm; IR  $\nu_{\text{max}}$  1529, 1456, 1396, 1265, 1051, 904, 798, 748, 698, 651  $\text{cm}^{-1}$ ; HRMS-ESI ( $m/z$ ):  $[\text{M}+\text{Na}]^+$  calcd for  $\text{C}_{20}\text{H}_{28}\text{O}_4\text{Na}$ , 355.1880; found, 355.1868; Enantiomeric excess: 99%, determined by HPLC (Daicel Chiralpak OD-H, hexane/isopropanol = 90/10, flow rate 0.8 mL/min, T = 25 °C, 230 nm):  $t_R = 8.289$  min (minor),  $t_R = 9.444$  min (major).

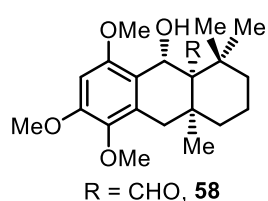

**58** (72 mg) was prepared according to general procedure in 66% yield. The reaction time was 90 min under 366 nm light. The product was isolated through silica gel column chromatography (6% to 20% ethyl acetate-petroleum ether) as a white solid:  $R_f = 0.2$  (20% ethyl acetate-petroleum ether); m.p. 75 – 77 °C;  $[\alpha]_D^{20} -3.5$  (c 0.16, DCM);  $^1\text{H NMR}$  (500 MHz,  $\text{CDCl}_3$ )  $\delta$  10.08 (s, 1H), 6.42 (s, 1H), 5.45 (s, 1H), 3.90 (s, 3H), 3.88 (s, 3H), 3.74 (s, 3H), 3.09 (s, 1H), 3.06 (d,  $J = 18.7$  Hz, 1H), 2.47 (d,  $J = 18.7$  Hz, 1H), 2.34 (td,  $J = 13.6, 4.3$  Hz, 1H), 1.76 (ddd,  $J = 14.6, 10.3, 7.2$  Hz, 1H), 1.61 – 1.56 (m, 2H), 1.38 (dt,  $J = 14.2, 3.2$  Hz, 1H), 1.27 – 1.19 (m, 1H), 1.16 (s, 3H), 1.08 (s, 3H), 0.69 (s, 3H) ppm;  $^{13}\text{C NMR}$  (125 MHz,  $\text{CDCl}_3$ )  $\delta$  207.4, 153.4, 152.0, 140.1, 130.5, 119.1,

94.6, 64.4, 60.1, 57.0, 55.9, 55.8, 38.3, 36.8, 36.7, 36.5, 33.4, 29.1, 28.7, 25.9, 18.5 ppm; IR  $\nu_{\max}$  1371, 1282, 1267, 1180, 1141, 900, 844, 744, 707  $\text{cm}^{-1}$ ; HRMS–ESI ( $m/z$ ):  $[\text{M}+\text{Na}]^+$  calcd for  $\text{C}_{21}\text{H}_{30}\text{O}_5\text{Na}$ , 385.1985; found, 385.1967; Enantiomeric excess: 97%, determined by HPLC (Daicel Chiralpak IG, hexane/isopropanol = 70/30, flow rate 0.8 mL/min,  $T = 25\text{ }^\circ\text{C}$ , 230 nm):  $t_{\text{R}} = 13.596$  min (major),  $t_{\text{R}} = 15.106$  min (minor).

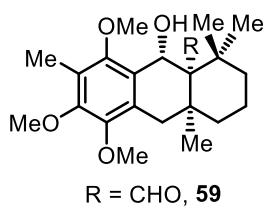

**59** (82 mg) was prepared according to general procedure in 73% yield. Ligand **L12** (0.15 mmol, 0.5 equiv.) was used instead of **L10**. The reaction time was 90 min under 366 nm light. The product was isolated through silica gel column chromatography (6% to 20% ethyl acetate-petroleum ether) as a colorless oil:  $R_f = 0.4$  (20% ethyl acetate-petroleum ether);  $[\alpha]_{\text{D}}^{20} -14.3$  (c 1.28, DCM);  $^1\text{H NMR}$  (500 MHz,  $\text{CDCl}_3$ )  $\delta$  10.14 (s, 1H), 5.43 (d,  $J = 2.8$  Hz, 1H), 3.86 (s, 3H), 3.82 (s, 3H), 3.78 (s, 3H), 3.36 (d,  $J = 3.2$  Hz, 1H), 3.03 (d,  $J = 18.5$  Hz, 1H), 2.49 (d,  $J = 18.5$  Hz, 1H), 2.28 (td,  $J = 13.7, 4.3$  Hz, 1H), 2.20 (s, 3H), 1.81 (dd,  $J = 13.4, 3.9$  Hz, 1H), 1.69 – 1.61 (m, 2H), 1.48 – 1.40 (m, 1H), 1.30 – 1.22 (m, 1H), 1.18 (s, 3H), 1.05 (s, 3H), 0.68 (s, 3H) ppm;  $^{13}\text{C NMR}$  (125 MHz,  $\text{CDCl}_3$ )  $\delta$  208.4, 152.6, 151.3, 146.8, 127.3, 127.2, 123.1, 64.7, 61.3, 60.1, 59.8, 57.5, 38.7, 37.1, 36.5, 36.1, 33.2, 29.7, 28.8, 26.2, 18.6, 9.5 ppm; IR  $\nu_{\max}$  2360, 1463, 1267, 1078, 748, 705  $\text{cm}^{-1}$ ; HRMS–ESI ( $m/z$ ):  $[\text{M}+\text{Na}]^+$  calcd for  $\text{C}_{22}\text{H}_{32}\text{O}_5\text{Na}$ , 399.2142; found, 399.2125; Enantiomeric excess: 85%, determined by HPLC (Daicel Chiralpak IG, hexane/isopropanol = 70/30, flow rate 0.8 mL/min,  $T = 25\text{ }^\circ\text{C}$ , 230 nm):  $t_{\text{R}} = 6.816$  min (major),  $t_{\text{R}} = 8.958$  min (minor).

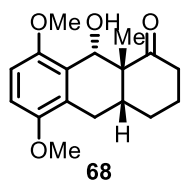

**68** (52.2 mg) was prepared according to general procedure in 60% yield. Ligand **L10** (0.24 mmol, 0.8 equiv.) was used. The reaction time was 90 min under 366 nm light. The product was isolated through silica gel column chromatography (6% to 20% ethyl acetate-petroleum ether) as a white solid:  $R_f = 0.46$  (20% ethyl acetate-petroleum ether); m.p. 137 - 139  $^\circ\text{C}$ ;  $[\alpha]_{\text{D}}^{20} +96.8$  (c 0.47, DCM);  $^1\text{H NMR}$  (400 MHz,  $\text{CDCl}_3$ )  $\delta$  6.74 (d,  $J = 8.8$  Hz, 1H), 6.70 (d,  $J = 8.8$  Hz, 1H), 4.69 (d,  $J = 3.0$  Hz, 1H), 3.81 (s, 3H), 3.80 (s, 3H), 2.96 (d,  $J = 3.2$  Hz, 1H), 2.88 – 2.72 (m, 3H), 2.59 – 2.48 (m, 1H), 2.26 – 2.14 (m, 1H), 2.13 – 1.95 (m, 2H), 1.84 – 1.70 (m, 1H), 1.57 – 1.49 (m, 1H), 1.09 (s, 3H) ppm;  $^{13}\text{C NMR}$  (100 MHz,  $\text{CDCl}_3$ )  $\delta$  215.3, 151.7, 151.4, 126.1, 123.8, 108.8, 107.3, 68.6, 55.6, 55.5, 50.3, 41.2, 38.9, 27.8, 26.5, 23.7, 20.9 ppm; IR  $\nu_{\max}$  3055, 1697, 1423, 1265, 1107, 808  $\text{cm}^{-1}$ ; HRMS–EI ( $m/z$ ):  $[\text{M}]^+$  calcd for  $\text{C}_{17}\text{H}_{22}\text{O}_4$ , 290.1518; found, 290.1522; Enantiomeric excess: 88%, determined by HPLC (Daicel Chiralpak IG, hexane/isopropanol = 70/30, flow rate 0.8 mL/min,  $T = 25\text{ }^\circ\text{C}$ , 230 nm):  $t_{\text{R}} = 8.785$  min (major),  $t_{\text{R}} = 11.375$  min (minor).

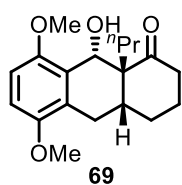

**69** (69 mg) was prepared according to general procedure in 72% yield. Ligand **L10** (0.24 mmol, 0.8 equiv.) was used. The reaction time was 90 min under 366 nm light. The product was isolated through silica gel column chromatography (6% to 20% ethyl acetate-petroleum ether) as a white solid:  $R_f = 0.5$  (20% ethyl acetate-petroleum ether); m.p. 116 - 118  $^\circ\text{C}$ ;  $[\alpha]_{\text{D}}^{20} +90.9$  (c 0.18, DCM);  $^1\text{H NMR}$  (500 MHz,  $\text{CDCl}_3$ )  $\delta$  6.75 (d,  $J = 8.8$  Hz, 1H), 6.71 (d,  $J = 8.8$  Hz, 1H), 4.70 (d,  $J = 3.3$  Hz, 1H), 3.82 (s, 6H), 2.93 (d,  $J = 3.4$  Hz, 1H), 2.86 – 2.80 (m, 1H), 2.73 – 2.65 (m, 2H), 2.55 – 2.47 (m, 1H), 2.41 – 2.33 (m, 1H), 2.25 – 2.12 (m, 1H), 2.04 – 1.96 (m, 1H), 1.95 – 1.87 (m, 1H), 1.86 – 1.75 (m, 1H), 1.64 – 1.55 (m, 1H), 1.36 – 1.24 (m, 1H), 1.22 – 1.12 (m, 1H), 1.11 – 1.03 (m, 1H), 0.84 (t,  $J = 7.2$  Hz, 3H) ppm;  $^{13}\text{C NMR}$  (125 MHz,  $\text{CDCl}_3$ )  $\delta$  215.4, 151.6, 151.3, 126.3, 124.1, 108.7, 107.2, 69.4, 55.6, 55.5, 53.7, 41.2, 35.8, 33.1, 27.0, 26.1, 22.5, 18.3, 14.7 ppm; IR  $\nu_{\max}$  3738, 3055, 1697, 1267, 1105, 802, 742  $\text{cm}^{-1}$ ; HRMS–EI ( $m/z$ ):  $[\text{M}]^+$  calcd for  $\text{C}_{19}\text{H}_{26}\text{O}_4$ , 318.1831; found, 318.1829; Enantiomeric excess: 98%, determined by HPLC (Daicel Chiralpak IG, hexane/isopropanol = 70/30, flow rate 0.8 mL/min,  $T = 25\text{ }^\circ\text{C}$ , 230 nm):  $t_{\text{R}} = 9.407$  min (major),  $t_{\text{R}} = 10.959$  min (minor).

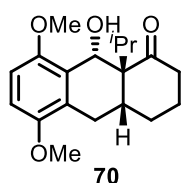

**70** (52.3 mg) was prepared according to general procedure in 55% yield. The reaction time was 90 min under 366 nm light. The product was isolated through silica gel column chromatography (6% to 20% ethyl acetate-petroleum ether) as a yellow solid:  $R_f = 0.29$  (20% ethyl acetate-petroleum ether); m.p. 85 - 87  $^\circ\text{C}$ ;  $[\alpha]_{\text{D}}^{20} +59.6$  (c 0.05, DCM);  $^1\text{H NMR}$  (400 MHz,  $\text{CDCl}_3$ )  $\delta$  6.74 (d,  $J = 8.8$  Hz, 1H), 6.68 (d,  $J = 8.8$  Hz, 1H), 5.41 (d,  $J = 3.5$  Hz, 1H), 3.80 (s, 3H), 3.79 (s, 3H), 3.01 (dd,  $J = 16.9, 7.0$  Hz, 1H), 2.68 (dd,  $J = 16.9, 6.7$  Hz, 1H), 2.55 – 2.46

(m, 3H), 2.40 – 2.29 (m, 1H), 2.00 – 1.78 (m, 5H), 0.86 (d,  $J = 6.8$  Hz, 3H), 0.77 (d,  $J = 7.0$  Hz, 3H) ppm;  $^{13}\text{C}$  NMR (100 MHz,  $\text{CDCl}_3$ )  $\delta$  217.6, 150.80, 150.76, 127.4, 126.5, 109.8, 107.9, 67.4, 57.7, 55.9, 55.8, 41.3, 34.5, 34.2, 30.0, 27.0, 20.8, 18.6, 18.5 ppm; IR  $\nu_{\text{max}}$  3055, 2306, 1697, 1267, 1105, 802, 742  $\text{cm}^{-1}$ ; HRMS–EI ( $m/z$ ):  $[\text{M}]^+$  calcd for  $\text{C}_{19}\text{H}_{26}\text{O}_4$ , 318.1831; found, 318.1836; Enantiomeric excess: 95%, determined by HPLC (Daicel Chiralpak IG, hexane/isopropanol = 70/30, flow rate 0.8 mL/min,  $T = 25$  °C, 230 nm):  $t_{\text{R}} = 11.371$  min (major),  $t_{\text{R}} = 21.511$  min (minor).

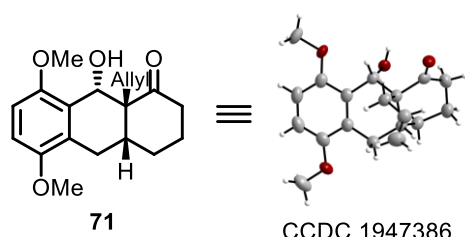

**71** (72.5 mg) was prepared according to general procedure in 76% yield. The reaction time was 90 min under 366 nm light. The product was isolated through silica gel column chromatography (6% to 20% ethyl acetate-petroleum ether) as a white solid:  $R_f = 0.5$  (20% ethyl acetate-petroleum ether); m.p. 121 - 123 °C;  $[\alpha]_{\text{D}}^{20} +57.1$  (c 0.44, DCM); and it was recrystallized from DCM /hexane (V/V = 1/4) at 25 °C, to obtain colorless crystals, CCDC (1947386).  $^1\text{H}$  NMR (500 MHz,  $\text{CDCl}_3$ )  $\delta$  6.74 (d,  $J = 8.8$

Hz, 1H), 6.69 (d,  $J = 8.8$  Hz, 1H), 5.72 – 5.59 (m, 1H), 5.04 – 5.01 (m, 1H), 5.00 (d,  $J = 1.5$  Hz, 1H), 4.69 (d,  $J = 3.1$  Hz, 1H), 3.81 (s, 6H), 2.94 (d,  $J = 3.3$  Hz, 1H), 2.85 – 2.65 (m, 4H), 2.54 – 2.45 (m, 1H), 2.35 – 2.25 (m, 1H), 2.23 – 2.13 (m, 1H), 2.01 – 1.91 (m, 1H), 1.81 – 1.72 (m, 2H), 1.59 – 1.51 (m, 1H) ppm;  $^{13}\text{C}$  NMR (125 MHz,  $\text{CDCl}_3$ )  $\delta$  214.8, 151.8, 151.6, 135.0, 126.2, 124.3, 117.8, 109.0, 107.4, 68.9, 55.9, 55.7, 53.8, 41.7, 38.2, 33.5, 27.3, 25.7, 23.0 ppm; IR  $\nu_{\text{max}}$  3055, 1697, 1267, 1105, 742  $\text{cm}^{-1}$ ; HRMS–EI ( $m/z$ ):  $[\text{M}]^+$  calcd for  $\text{C}_{19}\text{H}_{24}\text{O}_4$ , 316.1675; found, 316.1673; Enantiomeric excess: 87%, determined by HPLC (Daicel Chiralpak IG, hexane/isopropanol = 70/30, flow rate 0.8 mL/min,  $T = 25$  °C, 230 nm):  $t_{\text{R}} = 9.109$  min (major),  $t_{\text{R}} = 12.277$  min (minor).

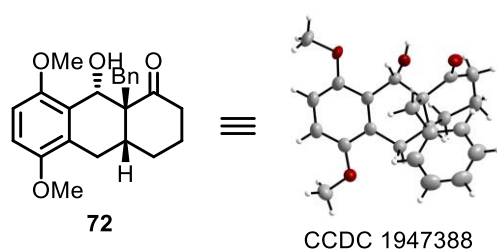

**72** (80.5 mg) was prepared according to general procedure in 73% yield. The reaction time was 90 min under 366 nm light. The product was isolated through silica gel column chromatography (6% to 20% ethyl acetate-petroleum ether) as a yellow solid:  $R_f = 0.36$  (20% ethyl acetate-petroleum ether); m.p. 145 - 147 °C;  $[\alpha]_{\text{D}}^{20} +58.9$  (c 0.12, DCM); and it was recrystallized from DCM /hexane (V/V = 1/4) at 25 °C, to obtain colorless crystals, CCDC (1947388).  $^1\text{H}$  NMR (500 MHz,

$\text{CDCl}_3$ )  $\delta$  7.25 – 7.16 (m, 3H), 7.16 – 7.10 (m, 2H), 6.77 (d,  $J = 8.8$  Hz, 1H), 6.73 (d,  $J = 8.8$  Hz, 1H), 4.91 (d,  $J = 3.5$  Hz, 1H), 3.84 (s, 3H), 3.83 (s, 3H), 3.58 (d,  $J = 13.7$  Hz, 1H), 2.91 – 2.84 (m, 2H), 2.75 (d,  $J = 18.2$  Hz, 1H), 2.59 (ddd,  $J = 16.6, 9.4, 7.0$  Hz, 1H), 2.41 – 2.32 (m, 1H), 2.21 (d,  $J = 13.7$  Hz, 1H), 2.15 – 2.04 (m, 2H), 1.92 – 1.83 (m, 1H), 1.66 – 1.59 (m, 1H), 1.52 – 1.46 (m, 1H) ppm;  $^{13}\text{C}$  NMR (125 MHz,  $\text{CDCl}_3$ )  $\delta$  216.1, 151.6, 151.4, 138.2, 130.1 (2C), 128.2 (2C), 126.3, 125.8, 123.9, 108.9, 107.3, 69.0, 55.7, 55.5, 55.0, 41.2, 39.3, 31.5, 26.8, 25.9, 21.2 ppm; IR  $\nu_{\text{max}}$  3691, 3055, 1697, 1267, 1105, 804  $\text{cm}^{-1}$ ; HRMS–EI ( $m/z$ ):  $[\text{M}]^+$  calcd for  $\text{C}_{23}\text{H}_{26}\text{O}_4$ , 366.1831; found, 366.1826; Enantiomeric excess: 91%, determined by HPLC (Daicel Chiralpak IG, hexane/isopropanol = 70/30, flow rate 0.8 mL/min,  $T = 25$  °C, 230 nm):  $t_{\text{R}} = 10.404$  min (major),  $t_{\text{R}} = 13.115$  min (minor).

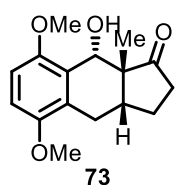

**73** (76.2 mg) was prepared according to general procedure in 92% yield. The reaction time was 90 min under 366 nm light. The product was isolated through silica gel column chromatography (6% to 20% ethyl acetate-petroleum ether) as a white solid:  $R_f = 0.18$  (20% ethyl acetate-petroleum ether); m.p. 122 - 124 °C;  $[\alpha]_{\text{D}}^{20} +104$  (c 0.23, DCM);  $^1\text{H}$  NMR (400 MHz,  $\text{CDCl}_3$ )  $\delta$  6.77 (d,  $J = 8.8$  Hz, 1H), 6.70 (d,  $J = 8.8$  Hz, 1H), 4.95 (d,  $J = 2.5$  Hz, 1H), 3.81 (s, 3H), 3.79 (s, 3H), 2.99 (dd,  $J = 17.8, 7.6$  Hz, 1H), 2.86 (dd,  $J = 17.8, 4.0$  Hz, 1H), 2.51 – 2.41 (m, 1H), 2.38 (d,  $J = 3.3$  Hz, 1H), 2.30 – 2.16 (m, 2H), 2.06 – 1.93 (m, 2H), 0.96 (s, 3H) ppm;  $^{13}\text{C}$  NMR (100 MHz,  $\text{CDCl}_3$ )  $\delta$  222.4, 151.6, 151.3, 126.2, 124.9, 109.7, 107.7, 67.6, 55.81, 55.76, 50.1, 40.3, 38.7, 26.7, 24.0, 21.2 ppm; IR  $\nu_{\text{max}}$  3736, 3055, 1697, 1421, 1267, 1107  $\text{cm}^{-1}$ ; HRMS–ESI ( $m/z$ ):  $[\text{M}+\text{Na}]^+$  calcd for  $\text{C}_{16}\text{H}_{20}\text{O}_4\text{Na}$ , 299.1254; found, 299.1251; Enantiomeric excess: 86%, determined by HPLC (Daicel Chiralpak IG, hexane/isopropanol = 70/30, flow rate 0.8 mL/min,  $T = 25$  °C, 230 nm):  $t_{\text{R}} = 11.862$  min (major),  $t_{\text{R}} = 15.564$  min (minor).

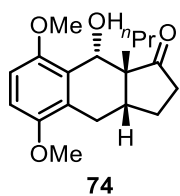

74

**74** (87 mg) was prepared according to general procedure in 95% yield. Ligand **L10** (0.24 mmol, 0.8 equiv.) was used. The reaction time was 90 min under 366 nm light. The product was isolated through silica gel column chromatography (6% to 20% ethyl acetate-petroleum ether) as a colorless oil:  $R_f = 0.2$  (20% ethyl acetate-petroleum ether);  $[\alpha]_D^{20} +91.8$  (c 0.84, DCM);  $^1\text{H NMR}$  (400 MHz,  $\text{CDCl}_3$ )  $\delta$  6.76 (d,  $J = 8.9$  Hz, 1H), 6.68 (d,  $J = 8.9$  Hz, 1H), 5.00 (s, 1H), 3.80 (s, 3H), 3.78 (s, 3H), 3.01 (dd,  $J = 17.2, 7.6$  Hz, 1H), 2.80 (dd,  $J = 17.2, 5.1$  Hz, 1H), 2.50 – 2.38 (m, 2H), 2.29 (s, 1H), 2.25 – 2.12 (m, 1H), 2.08 – 1.90 (m, 2H), 1.65 – 1.56 (m, 1H), 1.18 (ddt,  $J = 15.1, 7.8, 3.6$  Hz, 1H), 1.10 – 1.00 (m, 2H), 0.78 (t,  $J = 7.0$  Hz, 3H) ppm;  $^{13}\text{C NMR}$  (100 MHz,  $\text{CDCl}_3$ )  $\delta$  222.3, 151.3, 151.1, 126.8, 125.6, 109.8, 107.8, 67.9, 55.8 (t,  $J = 3.0$  Hz, 2C), 54.6, 39.6, 37.0, 36.5, 26.7, 24.6, 17.8, 14.6 ppm; IR  $\nu_{\text{max}}$  1481, 1394, 1265, 1085, 904, 798, 744, 698, 651  $\text{cm}^{-1}$ ; HRMS–ESI ( $m/z$ ):  $[\text{M}+\text{Na}]^+$  calcd for  $\text{C}_{18}\text{H}_{24}\text{O}_4\text{Na}$ , 327.1567; found, 327.1562; Enantiomeric excess: 92%, determined by HPLC (Daicel Chiralpak IG, hexane/isopropanol = 70/30, flow rate 0.8 mL/min,  $T = 25$  °C, 230 nm):  $t_R = 11.261$  min (major),  $t_R = 13.630$  min (minor).

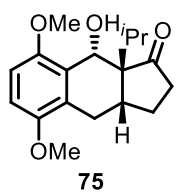

75

**75** (55.1 mg) was prepared according to general procedure in 60% yield. The reaction time was 90 min under 366 nm light. The product was isolated through silica gel column chromatography (6% to 20% ethyl acetate-petroleum ether) as a white solid:  $R_f = 0.19$  (20% ethyl acetate-petroleum ether); m.p. 121 - 123 °C;  $[\alpha]_D^{20} +153$  (c 0.25, DCM);  $^1\text{H NMR}$  (400 MHz,  $\text{CDCl}_3$ )  $\delta$  6.75 (d,  $J = 8.8$  Hz, 1H), 6.68 (d,  $J = 8.8$  Hz, 1H), 5.21 (d,  $J = 3.1$  Hz, 1H), 3.80 (s, 6H), 3.11 (dd,  $J = 16.4, 7.3$  Hz, 1H), 2.73 (dd,  $J = 16.4, 7.3$  Hz, 1H), 2.51 – 2.38 (m, 2H), 2.27 – 2.14 (m, 2H), 2.12 – 1.98 (m, 2H), 1.94 – 1.83 (m, 1H), 0.80 (d,  $J = 6.8$  Hz, 3H), 0.55 (d,  $J = 7.0$  Hz, 3H) ppm;  $^{13}\text{C NMR}$  (100 MHz,  $\text{CDCl}_3$ )  $\delta$  223.0, 150.9, 150.4, 128.0, 126.8, 110.0, 108.0, 67.3, 58.7, 55.9, 55.8, 39.8, 35.0, 33.8, 27.2, 26.0, 19.0, 17.8 ppm; IR  $\nu_{\text{max}}$  3055, 1691, 1489, 1267, 1105, 744  $\text{cm}^{-1}$ ; HRMS–ESI ( $m/z$ ):  $[\text{M}+\text{Na}]^+$  calcd for  $\text{C}_{18}\text{H}_{24}\text{O}_4\text{Na}$ , 327.1572; found, 327.1562; Enantiomeric excess: 93%, determined by HPLC (Daicel Chiralpak IG, hexane/isopropanol = 70/30, flow rate 0.8 mL/min,  $T = 25$  °C, 230 nm):  $t_R = 13.622$  min (major),  $t_R = 15.511$  min (minor).

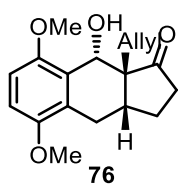

76

**76** (86 mg) was prepared according to general procedure in 95% yield. Ligand **L10** (0.24 mmol, 0.8 equiv.) was used. The reaction time was 90 min under 366 nm light. The product was isolated through silica gel column chromatography (6% to 20% ethyl acetate-petroleum ether) as a white solid:  $R_f = 0.2$  (20% ethyl acetate-petroleum ether); m.p. 85 - 87 °C;  $[\alpha]_D^{20} +87.2$  (c 0.36, DCM);  $^1\text{H NMR}$  (500 MHz,  $\text{CDCl}_3$ )  $\delta$  6.77 (d,  $J = 8.9$  Hz, 1H), 6.69 (d,  $J = 8.9$  Hz, 1H), 5.61 – 5.50 (m, 1H), 5.00 (d,  $J = 2.5$  Hz, 1H), 4.97 (d,  $J = 1.3$  Hz, 1H), 4.96 – 4.92 (m, 1H), 3.81 (s, 3H), 3.79 (s, 3H), 2.95 (dd,  $J = 17.5, 7.6$  Hz, 1H), 2.81 (dd,  $J = 17.5, 4.6$  Hz, 1H), 2.50 – 2.40 (m, 3H), 2.38 (d,  $J = 3.5$  Hz, 1H), 2.15 (ddd,  $J = 18.2, 9.6, 8.5$  Hz, 1H), 2.02 – 1.93 (m, 2H), 1.83 (dd,  $J = 13.7, 8.7$  Hz, 1H) ppm;  $^{13}\text{C NMR}$  (125 MHz,  $\text{CDCl}_3$ )  $\delta$  221.5, 151.3, 151.2, 133.8, 126.2, 125.3, 118.2, 109.7, 107.7, 67.3, 55.8, 55.7, 54.2, 39.4, 38.9, 36.0, 26.6, 24.0 ppm; IR  $\nu_{\text{max}}$  2358, 2330, 2108, 1504, 1456, 744, 624  $\text{cm}^{-1}$ ; HRMS–ESI ( $m/z$ ):  $[\text{M}+\text{Na}]^+$  calcd for  $\text{C}_{18}\text{H}_{22}\text{O}_4\text{Na}$ , 325.1410; found, 325.1404; Enantiomeric excess: 99.5%, determined by HPLC (Daicel Chiralpak IG, hexane/isopropanol = 70/30, flow rate 0.8 mL/min,  $T = 25$  °C, 230 nm):  $t_R = 11.144$  min (major),  $t_R = 16.277$  min (minor).

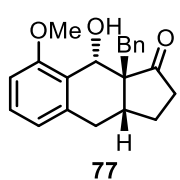

77

**77** (98 mg, d.r. = 10:1) was prepared according to general procedure in 98% yield. Ligand **L10** (0.24 mmol, 0.8 equiv.) was used. The reaction time was 90 min under 366 nm light. The product was isolated through silica gel column chromatography (6% to 20% ethyl acetate-petroleum ether) as a white solid:  $R_f = 0.3$  (20% ethyl acetate-petroleum ether);  $^1\text{H NMR}$  (500 MHz,  $\text{CDCl}_3$ )  $\delta$  7.25 – 7.22 (m, 1H), 7.22 – 7.15 (m, 3H), 7.03 – 6.99 (m, 2H), 6.84 (d,  $J = 7.6$  Hz, 1H), 6.77 (d,  $J = 8.3$  Hz, 1H), 5.23 (s, 1H), 3.84 (s, 3H), 3.27 (d,  $J = 13.3$  Hz, 1H), 2.95 (t,  $J = 6.1$  Hz, 2H), 2.37 (ddd,  $J = 17.8, 8.4, 4.6$  Hz, 1H), 2.33 – 2.23 (m, 2H), 2.10 (d,  $J = 13.3$  Hz, 1H), 1.89 (dt,  $J = 17.5, 8.6$  Hz, 1H), 1.83 – 1.76 (m, 1H), 1.61 (ddt,  $J = 11.8, 7.9, 3.8$  Hz, 1H) ppm;  $^{13}\text{C NMR}$  (125 MHz,  $\text{CDCl}_3$ )  $\delta$  222.2, 157.3, 137.5, 137.4, 130.1 (2C), 129.0, 128.1 (2C), 126.4, 125.1, 121.1, 108.2, 67.7, 57.0, 55.4, 40.7, 39.8, 36.0, 31.4, 26.5 ppm; IR  $\nu_{\text{max}}$  1732, 1589, 1280, 1340, 786, 736, 702, 682  $\text{cm}^{-1}$ ; HRMS–ESI ( $m/z$ ):  $[\text{M}+\text{Na}]^+$  calcd for  $\text{C}_{21}\text{H}_{22}\text{O}_3\text{Na}$ , 345.1461; found, 345.1455; Enantiomeric excess:

97%, determined by HPLC (Daicel Chiralpak IG, hexane/isopropanol = 70/30, flow rate 0.8 mL/min, T = 25 °C, 230 nm):  $t_R$  = 8.952 min (major),  $t_R$  = 10.329 min (minor).

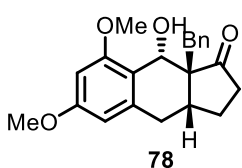

**78** (98.8 mg, d.r. = 5:1) was prepared according to general procedure in 94% yield. Ligand **L10** (0.24 mmol, 0.8 equiv.) was used. The reaction time was 90 min under 366 nm light. The product was isolated through silica gel column chromatography (6% to 20% ethyl acetate-petroleum ether) as a white solid;  $R_f$  = 0.46 (30% ethyl acetate-petroleum ether);  $^1\text{H NMR}$  (500 MHz,  $\text{CDCl}_3$ )  $\delta$  7.21 – 7.15 (m, 3H), 7.02 (d,  $J$  = 6.9 Hz, 2H), 6.36 (d,  $J$  = 2.3 Hz, 1H), 6.35 (d,  $J$  = 2.3 Hz, 1H), 5.14 (s, 1H), 3.83 (s, 3H), 3.82 (s, 3H), 3.26 (d,  $J$  = 13.4 Hz, 1H), 2.95 – 2.89 (m, 2H), 2.42 – 2.32 (m, 1H), 2.30 – 2.21 (m, 1H), 2.16 (s, 1H), 2.11 (d,  $J$  = 13.3 Hz, 1H), 1.93 – 1.76 (m, 2H), 1.64 – 1.57 (m, 1H) ppm;  $^{13}\text{C NMR}$  (125 MHz,  $\text{CDCl}_3$ )  $\delta$  222.3, 160.4, 158.5, 138.5, 137.5, 130.1 (2C), 128.2 (2C), 126.4, 117.9, 104.6, 96.3, 67.6, 57.1, 55.5, 55.3, 40.7, 39.8, 36.0, 31.8, 26.6 ppm; IR  $\nu_{\text{max}}$  2966, 1741, 1492, 1265, 1095, 813, 746  $\text{cm}^{-1}$ ; HRMS–EI ( $m/z$ ):  $[\text{M}]^+$  calcd for  $\text{C}_{22}\text{H}_{24}\text{O}_4$ , 352.1675; found, 352.1678; Enantiomeric excess: 98% (major), determined by HPLC (Daicel Chiralpak IG, hexane/isopropanol = 70/30, flow rate 0.8 mL/min, T = 25 °C, 230 nm):  $t_R$  = 13.803 min (minor),  $t_R$  = 18.339 min (major); Enantiomeric excess: 96% (minor), determined by HPLC (Daicel Chiralpak IG, hexane/isopropanol = 70/30, flow rate 0.8 mL/min, T = 25 °C, 230 nm):  $t_R$  = 10.880 min (major),  $t_R$  = 14.961 min (minor).

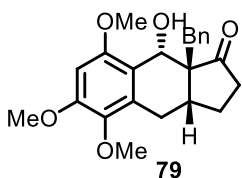

**79** (98.6 mg, d.r. = 9:1) was prepared according to general procedure in 86% yield. Ligand **L10** (0.24 mmol, 0.8 equiv.) was used. The reaction time was 90 min under 366 nm light. The product was isolated through silica gel column chromatography (6% to 20% ethyl acetate-petroleum ether) as a white solid;  $R_f$  = 0.28 (30% ethyl acetate-petroleum ether);  $^1\text{H NMR}$  (400 MHz,  $\text{CDCl}_3$ )  $\delta$  7.22 – 7.14 (m, 3H), 7.03 – 6.97 (m, 2H), 6.42 (s, 1H), 5.17 (d,  $J$  = 2.4 Hz, 1H), 3.91 (s, 3H), 3.85 (s, 3H), 3.78 (s, 3H), 3.23 (d,  $J$  = 13.3 Hz, 1H), 3.17 – 3.08 (m, 1H), 2.79 (dd,  $J$  = 16.7, 6.3 Hz, 1H), 2.42 – 2.31 (m, 1H), 2.31 – 2.21 (m, 1H), 2.10 (d,  $J$  = 13.3 Hz, 2H), 1.95 – 1.76 (m, 2H), 1.67 – 1.60 (m, 1H) ppm;  $^{13}\text{C NMR}$  (100 MHz,  $\text{CDCl}_3$ )  $\delta$  222.4, 154.0, 153.0, 140.3, 137.4, 131.1, 130.1 (2C), 128.2 (2C), 126.5, 117.7, 94.7, 67.8, 60.7, 56.8, 56.0, 40.9, 39.8, 35.8, 26.9, 25.0 ppm; IR  $\nu_{\text{max}}$  2962, 1734, 1489, 1259, 1095, 796, 744  $\text{cm}^{-1}$ ; HRMS–EI ( $m/z$ ):  $[\text{M}]^+$  calcd for  $\text{C}_{23}\text{H}_{26}\text{O}_5$ , 382.1780; found, 382.1777; Enantiomeric excess: 97% (major), determined by HPLC (Daicel Chiralpak OD-H, hexane/isopropanol = 70/30, flow rate 0.8 mL/min, T = 25 °C, 230 nm):  $t_R$  = 7.685 min (major),  $t_R$  = 9.340 min (minor).

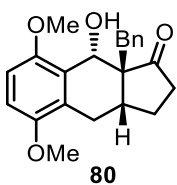

**80** (101 mg) was prepared according to general procedure in 96% yield. Ligand **L10** (0.24 mmol, 0.8 equiv.) was used. The reaction time was 90 min under 366 nm light. The product was isolated through silica gel column chromatography (6% to 20% ethyl acetate-petroleum ether) as a white solid;  $R_f$  = 0.3 (20% ethyl acetate-petroleum ether); m.p. 108 – 110 °C;  $[\alpha]_D^{20}$  +62.4 (c 0.76, DCM);  $^1\text{H NMR}$  (400 MHz,  $\text{CDCl}_3$ )  $\delta$  7.23 – 7.15 (m, 3H), 7.08 – 7.02 (m, 2H), 6.79 (d,  $J$  = 8.8 Hz, 1H), 6.72 (d,  $J$  = 8.8 Hz, 1H), 5.08 (d,  $J$  = 2.7 Hz, 1H), 3.83 (s, 3H), 3.82 (s, 3H), 3.33 (d,  $J$  = 13.4 Hz, 1H), 2.96 (dd,  $J$  = 18.0, 7.8 Hz, 1H), 2.80 (dd,  $J$  = 18.0, 3.7 Hz, 1H), 2.44 (d,  $J$  = 3.5 Hz, 1H), 2.40 – 2.31 (m, 1H), 2.24 – 2.13 (m, 2H), 1.95 – 1.82 (m, 2H), 1.74 – 1.65 (m, 1H) ppm;  $^{13}\text{C NMR}$  (100 MHz,  $\text{CDCl}_3$ )  $\delta$  221.9, 151.6, 151.3, 137.7, 130.1 (2C), 128.2 (2C), 126.4, 126.0, 125.0, 109.7, 107.7, 67.63, 67.61, 55.8 (dd,  $J$  = 5.3, 3.2 Hz, 1C), 55.7, 39.7, 39.6, 34.5, 26.5, 23.9 ppm; IR  $\nu_{\text{max}}$  1720, 1481, 1265, 1089, 744  $\text{cm}^{-1}$ ; HRMS–ESI ( $m/z$ ):  $[\text{M}+\text{Na}]^+$  calcd for  $\text{C}_{22}\text{H}_{24}\text{O}_4\text{Na}$ , 375.1567; found, 375.1561; Enantiomeric excess: 97%, determined by HPLC (Daicel Chiralpak IG, hexane/isopropanol = 70/30, flow rate 0.8 mL/min, T = 25 °C, 230 nm):  $t_R$  = 11.387 min (major),  $t_R$  = 14.498 min (minor).

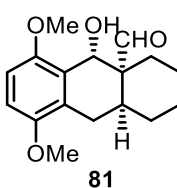

**81** (73 mg) was prepared according to general procedure in 84% yield. The reaction time was 90 min under 366 nm light. The product was isolated through silica gel column chromatography (6% to 20% ethyl acetate-petroleum ether) as a colorless oil;  $R_f$  = 0.25 (20% ethyl acetate-petroleum ether);  $[\alpha]_D^{20}$  +40.9 (c 0.70, DCM);  $^1\text{H NMR}$  (400 MHz,  $\text{CDCl}_3$ )  $\delta$  9.86 (s, 1H), 6.73 (d,  $J$  = 8.9 Hz, 1H), 6.70 (d,  $J$  = 8.8 Hz, 1H), 5.05 (s, 1H), 3.83 (s, 3H), 3.80 (s, 3H), 2.96 (s, 1H), 2.84 (dd,  $J$  = 18.7, 6.9 Hz, 1H), 2.63 (dd,  $J$  = 18.7, 7.9 Hz, 1H), 2.54 – 2.46

(m, 1H), 1.75 – 1.66 (m, 2H), 1.65 – 1.57 (m, 1H), 1.55 – 1.36 (m, 5H) ppm;  $^{13}\text{C}$  NMR (100 MHz,  $\text{CDCl}_3$ )  $\delta$  207.7, 151.7, 151.3, 125.8, 125.7, 108.9, 107.4, 67.59, 67.57, 55.59, 55.56, 51.3, 29.8, 27.2, 25.7, 25.1, 21.6 ppm; IR  $\nu_{\text{max}}$  1720, 1481, 1259, 1087, 904, 798, 744  $\text{cm}^{-1}$ ; HRMS–ESI ( $m/z$ ):  $[\text{M}+\text{Na}]^+$  calcd for  $\text{C}_{17}\text{H}_{22}\text{O}_4\text{Na}$ , 313.1410; found, 313.1406; Enantiomeric excess: 88%, determined by HPLC (Daicel Chiralpak IG, hexane/isopropanol = 70/30, flow rate 0.8 mL/min,  $T = 25\text{ }^\circ\text{C}$ , 240 nm):  $t_{\text{R}} = 16.842$  min (major),  $t_{\text{R}} = 20.397$  min (minor).

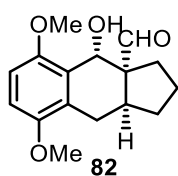

**82** (56 mg) was prepared according to general procedure in 68% yield. The reaction time was 90 min under 366 nm light. The product was isolated through silica gel column chromatography (6% to 20% ethyl acetate-petroleum ether) as a white solid:  $R_f = 0.25$  (20% ethyl acetate-petroleum ether); m.p. 46 – 48  $^\circ\text{C}$ ;  $[\alpha]_{\text{D}}^{20} -10.3$  (c 0.68, DCM);  $^1\text{H}$  NMR (500 MHz,  $\text{CDCl}_3$ )  $\delta$  9.79 (s, 1H), 6.79 (d,  $J = 8.8$  Hz, 1H), 6.71 (d,  $J = 8.9$  Hz, 1H), 5.44 (s, 1H), 3.81 (s, 3H), 3.78 (s, 3H), 2.99 – 2.92 (m, 1H), 2.86 (t,  $J = 4.6$  Hz, 2H), 2.43 (s, 1H), 1.99 – 1.90 (m, 2H), 1.41 (ddd,  $J = 13.3, 6.4, 3.4$  Hz, 1H), 1.31 – 1.21 (m, 1H), 1.13 – 1.05 (m, 2H) ppm;  $^{13}\text{C}$  NMR (125 MHz,  $\text{CDCl}_3$ )  $\delta$  203.9, 151.7, 151.3, 128.2, 126.4, 111.0, 108.5, 65.9, 61.4, 56.2, 56.0, 34.3, 34.0, 33.0, 24.5, 23.6 ppm; IR  $\nu_{\text{max}}$  2949, 1718, 1489, 1257, 1082, 740  $\text{cm}^{-1}$ ; HRMS–ESI ( $m/z$ ):  $[\text{M}+\text{Na}]^+$  calcd for  $\text{C}_{16}\text{H}_{20}\text{O}_4\text{Na}$ , 299.1254; found, 299.1250; Enantiomeric excess: 86%, determined by HPLC (Daicel Chiralpak IG, hexane/isopropanol = 92/8, flow rate 0.8 mL/min,  $T = 25\text{ }^\circ\text{C}$ , 230 nm):  $t_{\text{R}} = 35.280$  min (major),  $t_{\text{R}} = 37.406$  min (minor).

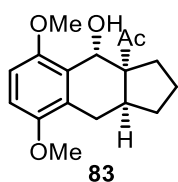

**83** (83 mg) was prepared according to general procedure in 95% yield. The reaction time was 90 min under 366 nm light. The product was isolated through silica gel column chromatography (6% to 20% ethyl acetate-petroleum ether) as a colorless oil:  $R_f = 0.2$  (20% ethyl acetate-petroleum ether);  $[\alpha]_{\text{D}}^{20} -21.1$  (c 0.92, DCM);  $^1\text{H}$  NMR (500 MHz,  $\text{CDCl}_3$ )  $\delta$  6.78 (d,  $J = 8.9$  Hz, 1H), 6.69 (d,  $J = 8.9$  Hz, 1H), 5.52 (s, 1H), 3.80 (s, 3H), 3.77 (s, 3H), 3.30 – 3.23 (m, 1H), 2.86 (dd,  $J = 15.7, 3.0$  Hz, 1H), 2.80 (dd,  $J = 15.7, 6.4$  Hz, 1H), 2.38 (s, 3H), 2.04 (s, 1H), 1.96 – 1.87 (m, 2H), 1.34 – 1.25 (m, 1H), 1.23 – 1.09 (m, 2H), 1.05 – 0.94 (m, 1H) ppm;  $^{13}\text{C}$  NMR (125 MHz,  $\text{CDCl}_3$ )  $\delta$  210.7, 151.7, 151.3, 128.3, 126.8, 111.0, 108.2, 66.2, 63.6, 56.2, 55.9, 35.6, 34.4, 33.9, 26.1, 24.9, 23.9 ppm; IR  $\nu_{\text{max}}$  3068, 1255, 705  $\text{cm}^{-1}$ ; HRMS–ESI ( $m/z$ ):  $[\text{M}+\text{Na}]^+$  calcd for  $\text{C}_{17}\text{H}_{22}\text{O}_4\text{Na}$ , 313.1410; found, 313.1408; Enantiomeric excess: 84%, determined by HPLC (Daicel Chiralpak OD-H, hexane/isopropanol = 85/15, flow rate 0.8 mL/min,  $T = 25\text{ }^\circ\text{C}$ , 230 nm):  $t_{\text{R}} = 11.026$  min (minor),  $t_{\text{R}} = 13.877$  min (major).

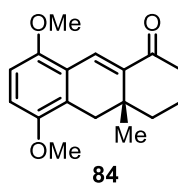

**84** (80 mg) was prepared according to general procedure in 87% yield. The reaction was quenched with hydrochloric acid (HCl, 1 N) instead of saturated sodium bicarbonate. The reaction time was 90 min under 366 nm light. The product was isolated through silica gel column chromatography (6% to 20% ethyl acetate-petroleum ether) as a yellow solid:  $R_f = 0.35$  (20% ethyl acetate-petroleum ether); m.p. 126 – 128  $^\circ\text{C}$ ;  $[\alpha]_{\text{D}}^{20} -30.4$  (c 0.12, DCM);  $^1\text{H}$  NMR (500 MHz,  $\text{CDCl}_3$ )  $\delta$  7.77 (s, 1H), 6.83 (d,  $J = 8.9$  Hz, 1H), 6.67 (d,  $J = 8.9$  Hz, 1H), 3.80 (d,  $J = 3.4$  Hz, 6H), 3.09 (d,  $J = 16.4$  Hz, 1H), 2.61 (ddd,  $J = 17.6, 4.7, 2.3$  Hz, 1H), 2.50 (d,  $J = 16.3$  Hz, 1H), 2.38 (ddd,  $J = 17.6, 12.3, 7.4$  Hz, 1H), 2.06 – 1.91 (m, 2H), 1.91 – 1.82 (m, 1H), 1.77 (dd,  $J = 13.0, 4.1$  Hz, 1H), 0.99 (s, 3H) ppm;  $^{13}\text{C}$  NMR (125 MHz,  $\text{CDCl}_3$ )  $\delta$  199.9, 151.9, 150.7, 139.8, 126.7, 125.8, 122.2, 113.0, 108.6, 56.1, 55.8, 39.9, 37.9, 37.1, 33.9, 23.3, 18.7 ppm; IR  $\nu_{\text{max}}$  1672, 1483, 1261, 1099, 910, 732  $\text{cm}^{-1}$ ; HRMS–ESI ( $m/z$ ):  $[\text{M}+\text{H}]^+$  calcd for  $\text{C}_{17}\text{H}_{21}\text{O}_3$ , 273.1485; found, 273.1479; Enantiomeric excess: 66%, determined by HPLC (Daicel Chiralpak OD-H, hexane/isopropanol = 85/15, flow rate 1.0 mL/min,  $T = 25\text{ }^\circ\text{C}$ , 230 nm):  $t_{\text{R}} = 7.072$  min (major),  $t_{\text{R}} = 8.418$  min (minor).

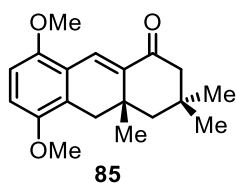

**85** (63 mg) was prepared according to general procedure in 66% yield. The reaction was quenched with hydrochloric acid (HCl, 1 N) instead of saturated sodium bicarbonate. The reaction time was 90 min under 366 nm light. The product was isolated through silica gel column chromatography (6% to 20% ethyl acetate-petroleum ether) as a yellow oil:  $R_f = 0.55$  (20% ethyl acetate-petroleum ether);  $[\alpha]_{\text{D}}^{20} -50.2$  (c 0.52, DCM);  $^1\text{H}$  NMR (400 MHz,  $\text{CDCl}_3$ )  $\delta$  7.75 (s, 1H), 6.81 (d,  $J = 9.0$  Hz, 1H), 6.67 (d,  $J = 8.9$  Hz, 1H), 3.79



(d,  $J = 4.1$  Hz, 6H), 3.04 (d,  $J = 16.5$  Hz, 1H), 2.61 (d,  $J = 16.5$  Hz, 1H), 2.36 (d,  $J = 16.3$  Hz, 1H), 2.29 (d,  $J = 16.3$  Hz, 1H), 1.76 (d,  $J = 12.0$  Hz, 1H), 1.72 (d,  $J = 12.0$  Hz, 1H), 1.08 (s, 3H), 1.06 (s, 3H), 1.05 (s, 3H) ppm;  $^{13}\text{C}$  NMR (125 MHz,  $\text{CDCl}_3$ )  $\delta$  200.6, 151.9, 150.8, 139.0, 126.6, 125.9, 122.3, 113.0, 108.6, 56.1, 55.8, 52.7, 51.3, 38.5, 32.7, 32.2, 30.9, 29.7, 27.6 ppm; IR  $\nu_{\text{max}}$  1678, 1485, 1261, 1190, 1097, 910, 796, 732  $\text{cm}^{-1}$ ; HRMS–ESI ( $m/z$ ):  $[\text{M}+\text{H}]^+$  calcd for  $\text{C}_{19}\text{H}_{25}\text{O}_3$ , 301.1798; found, 301.1791; Enantiomeric excess: 75%, determined by HPLC (Daicel Chiralpak IG, hexane/isopropanol = 90/10, flow rate 0.8 mL/min,  $T = 25$  °C, 230 nm):  $t_{\text{R}} = 15.053$  min (major),  $t_{\text{R}} = 17.159$  min (minor).

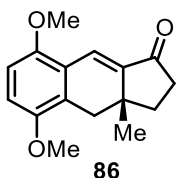

**86** (33 mg) was prepared according to general procedure in 43% yield. The reaction was quenched with hydrochloric acid (HCl, 1 N) instead of saturated sodium bicarbonate. The reaction time was 90 min under 366 nm light. The product was isolated through silica gel column chromatography (6% to 20% ethyl acetate-petroleum ether) as a yellow solid:  $R_f = 0.4$  (20% ethyl acetate-petroleum ether); m.p. 104 – 106 °C;  $[\alpha]_{\text{D}}^{20}$  -65.8 (c 0.60, DCM);  $^1\text{H}$  NMR (500 MHz,  $\text{CDCl}_3$ )  $\delta$  7.61 (s, 1H), 6.85 (d,  $J = 8.9$  Hz, 1H), 6.69 (d,  $J = 9.0$  Hz, 1H),

3.799 (s, 3H), 3.796 (s, 3H), 3.34 (d,  $J = 16.3$  Hz, 1H), 2.55 – 2.39 (m, 3H), 2.09 (ddd,  $J = 12.5, 8.2, 1.6$  Hz, 1H), 1.81 (td,  $J = 12.2, 8.7$  Hz, 1H), 1.01 (s, 3H) ppm;  $^{13}\text{C}$  NMR (125 MHz,  $\text{CDCl}_3$ )  $\delta$  206.6, 152.5, 151.1, 142.7, 125.5, 122.9, 122.3, 113.5, 109.0, 56.2, 56.0, 37.3, 37.0, 35.9, 35.5, 22.4 ppm; IR  $\nu_{\text{max}}$  1705, 1629, 1483, 1261, 1226, 1109, 1091, 910, 798, 732  $\text{cm}^{-1}$ ; HRMS–ESI ( $m/z$ ):  $[\text{M}+\text{H}]^+$  calcd for  $\text{C}_{16}\text{H}_{19}\text{O}_3$ , 259.1329; found, 259.1325; Enantiomeric excess: 82%, determined by HPLC (Daicel Chiralpak IG, hexane/isopropanol = 70/30, flow rate 0.8 mL/min,  $T = 25$  °C, 230 nm):  $t_{\text{R}} = 9.967$  min (minor),  $t_{\text{R}} = 11.633$  min (major).

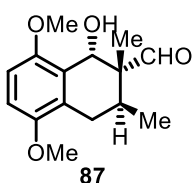

**87** (58.1 mg) was prepared according to general procedure in 81% yield. The reaction time was 90 min under 366 nm light. The product was isolated through silica gel column chromatography (6% to 20% ethyl acetate-petroleum ether) as a white solid:  $R_f = 0.22$  (20% ethyl acetate-petroleum ether); m.p. 75 - 77 °C;  $[\alpha]_{\text{D}}^{20}$  +99.6 (c 0.67, DCM);  $^1\text{H}$  NMR (400 MHz,  $\text{CDCl}_3$ )  $\delta$  9.93 (s, 1H), 6.74 (d,  $J = 8.9$  Hz, 1H), 6.69 (d,  $J = 8.9$  Hz, 1H),

4.92 (s, 1H), 3.81 (s, 3H), 3.80 (s, 3H), 2.96 (dd,  $J = 18.3, 5.6$  Hz, 1H), 2.82 – 2.70 (m, 1H), 2.49 (s, 1H), 2.18 (dd,  $J = 18.3, 11.5$  Hz, 1H), 1.04 (d,  $J = 6.8$  Hz, 3H), 0.85 (s, 3H) ppm;  $^{13}\text{C}$  NMR (125 MHz,  $\text{CDCl}_3$ )  $\delta$  208.9, 151.6, 150.8, 126.2, 125.9, 109.0, 107.4, 70.0, 55.56, 55.55, 50.5, 28.6, 25.9, 15.8, 10.6 ppm; IR  $\nu_{\text{max}}$  3055, 1718, 1483, 1625, 1085, 744  $\text{cm}^{-1}$ ; HRMS–ESI ( $m/z$ ):  $[\text{M}+\text{Na}]^+$  calcd for  $\text{C}_{15}\text{H}_{20}\text{O}_4\text{Na}$ , 287.1254; found, 287.1251; Enantiomeric excess: 91%, determined by HPLC (Daicel Chiralpak IG, hexane/isopropanol = 90/10, flow rate 0.8 mL/min,  $T = 25$  °C, 230 nm):  $t_{\text{R}} = 25.834$  min (major),  $t_{\text{R}} = 31.518$  min (minor).

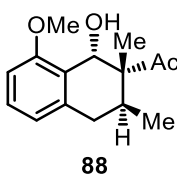

**88** (66 mg) was prepared according to general procedure in 89% yield. The reaction time was 90 min under 366 nm light. The product was isolated through silica gel column chromatography (6% to 20% ethyl acetate-petroleum ether) as a white solid:  $R_f = 0.2$  (20% ethyl acetate-petroleum ether); m.p. 88 – 90 °C;  $[\alpha]_{\text{D}}^{20}$  +51.2 (c 0.64, DCM);  $^1\text{H}$  NMR (500 MHz,  $\text{CDCl}_3$ )  $\delta$  7.19 (t,  $J = 7.9$  Hz, 1H), 6.74 (d,  $J = 7.8$  Hz, 1H), 6.72 (d,  $J = 8.2$  Hz, 1H),

4.92 (s, 1H), 3.85 (s, 3H), 2.86 (dd,  $J = 17.7, 5.8$  Hz, 1H), 2.75 – 2.66 (m, 1H), 2.51 – 2.40 (m, 2H), 2.32 (s, 3H), 1.03 (d,  $J = 6.5$  Hz, 3H), 0.99 (s, 3H) ppm;  $^{13}\text{C}$  NMR (125 MHz,  $\text{CDCl}_3$ )  $\delta$  212.6, 158.0, 137.2, 128.5, 124.8, 120.9, 107.6, 69.2, 55.4, 53.5, 34.8, 27.6, 26.6, 17.0, 13.2 ppm; IR  $\nu_{\text{max}}$  2956, 1710, 1589, 1469, 1259, 1099, 740, 561  $\text{cm}^{-1}$ ; HRMS–ESI ( $m/z$ ):  $[\text{M}+\text{Na}]^+$  calcd for  $\text{C}_{15}\text{H}_{20}\text{O}_3\text{Na}$ , 271.1305; found, 271.1301; Enantiomeric excess: 94%, determined by HPLC (Daicel Chiralpak IG, hexane/isopropanol = 90/10, flow rate 0.8 mL/min,  $T = 25$  °C, 230 nm):  $t_{\text{R}} = 20.782$  min (major),  $t_{\text{R}} = 21.418$  min (minor).

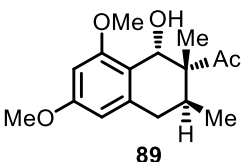

**89** (70.1 mg) was prepared according to general procedure in 84% yield. The reaction time was 90 min under 366 nm light. The product was isolated through silica gel column chromatography (6% to 20% ethyl acetate-petroleum ether) as a white solid:  $R_f = 0.23$  (30% ethyl acetate-petroleum ether); m.p. 97 - 99 °C;  $[\alpha]_{\text{D}}^{20}$  +49.6 (c 0.36, DCM);  $^1\text{H}$  NMR (500 MHz,  $\text{CDCl}_3$ )  $\delta$  6.31 (d,  $J = 2.3$  Hz, 1H), 6.23 (d,  $J = 2.3$  Hz, 1H), 4.86 (s, 1H), 3.83 (s, 3H), 3.78 (s, 3H), 2.82 (dd,  $J = 17.7, 5.8$  Hz, 1H), 2.75 – 2.63 (m, 1H), 2.41 (dd,

$J = 17.7, 11.9$  Hz, 1H), 2.30 (s, 3H), 1.02 (d,  $J = 6.5$  Hz, 3H), 0.98 (s, 3H) ppm;  $^{13}\text{C}$  NMR (125 MHz,  $\text{CDCl}_3$ )  $\delta$  212.5, 160.1, 159.1, 138.1, 117.7, 103.6, 96.5, 69.1, 55.4, 55.3, 53.6, 35.3, 27.4, 26.7, 17.0, 13.2 ppm; IR  $\nu_{\text{max}}$  3053, 2304, 1610, 1267, 1149, 941, 740  $\text{cm}^{-1}$ ; HRMS–EI ( $m/z$ ):  $[\text{M}]^+$  calcd for  $\text{C}_{16}\text{H}_{22}\text{O}_4$ , 278.1518; found, 278.1522; Enantiomeric excess: 90%, determined by HPLC (Daicel Chiralpak OD-H, hexane/isopropanol = 80/20, flow rate 0.8 mL/min,  $T = 25$  °C, 230 nm):  $t_{\text{R}} = 9.037$  min (minor),  $t_{\text{R}} = 11.962$  min (major).

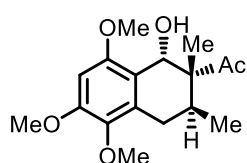

**90**

**90** (46.1 mg) was prepared according to general procedure in 50% yield. The reaction time was 90 min under 366 nm light. The product was isolated through silica gel column chromatography (6% to 20% ethyl acetate-petroleum ether) as a white solid:  $R_f = 0.15$  (30% ethyl acetate-petroleum ether); m.p. 117 - 119 °C;  $[\alpha]_{\text{D}}^{20} +39.6$  (c 0.28, DCM);  $^1\text{H}$  NMR (500 MHz,  $\text{CDCl}_3$ )  $\delta$  6.41 (s, 1H), 4.87 (s, 1H), 3.88 (s, 3H), 3.85 (s, 3H), 3.76 (s, 3H), 2.98 (dd,  $J = 18.4, 5.9$  Hz, 1H), 2.75 – 2.53 (m, 1H), 2.42 (s, 1H), 2.31 (s, 3H), 2.22

(dd,  $J = 18.4, 11.9$  Hz, 1H), 1.06 (d,  $J = 6.6$  Hz, 3H), 0.96 (s, 3H) ppm;  $^{13}\text{C}$  NMR (125 MHz,  $\text{CDCl}_3$ )  $\delta$  213.0, 154.5, 152.3, 139.7, 131.0, 117.4, 94.7, 69.2, 60.1, 55.9, 55.7, 53.3, 29.5, 27.7, 26.3, 17.1, 13.2 ppm; IR  $\nu_{\text{max}}$  3053, 1708, 1492, 1236, 1124, 738  $\text{cm}^{-1}$ ; HRMS–ESI ( $m/z$ ):  $[\text{M}+\text{Na}]^+$  calcd for  $\text{C}_{17}\text{H}_{24}\text{O}_5\text{Na}$ , 331.1516; found, 331.1515; Enantiomeric excess: 90%, determined by HPLC (Daicel Chiralpak IG, hexane/isopropanol = 70/30, flow rate 0.8 mL/min,  $T = 25$  °C, 230 nm):  $t_{\text{R}} = 17.420$  min (minor),  $t_{\text{R}} = 22.880$  min (major).

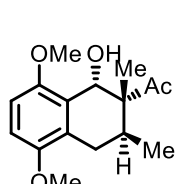

**91**

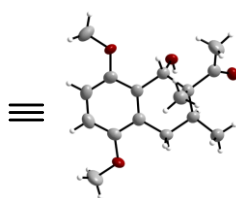

CCDC 1947387

**91** (73.5 mg) was prepared according to general procedure in 88% yield. The reaction time was 90 min under 366 nm light. The product was isolated through silica gel column chromatography (6% to 20% ethyl acetate-petroleum ether) as a white solid:  $R_f = 0.15$  (20% ethyl acetate-petroleum ether); m.p. 111 - 113 °C;  $[\alpha]_{\text{D}}^{20} +77.6$  (c 0.74, DCM); and it was recrystallized from DCM /hexane (V/V = 1/4) at 25 °C, to obtain colorless crystals, CCDC (1947387).  $^1\text{H}$  NMR (400 MHz,  $\text{CDCl}_3$ )  $\delta$  6.72 (d,  $J = 8.9$

Hz, 1H), 6.69 (d,  $J = 8.9$  Hz, 1H), 4.90 (s, 1H), 3.82 (s, 3H), 3.79 (s, 3H), 2.93 (dd,  $J = 18.6, 6.0$  Hz, 1H), 2.69 – 2.60 (m, 1H), 2.54 (s, 1H), 2.31 (s, 3H), 2.12 (dd,  $J = 18.5, 11.7$  Hz, 1H), 1.06 (d,  $J = 6.5$  Hz, 3H), 0.97 (s, 3H) ppm;  $^{13}\text{C}$  NMR (125 MHz,  $\text{CDCl}_3$ )  $\delta$  212.9, 151.7, 150.8, 126.2, 125.9, 108.9, 107.4, 69.4, 55.6, 55.5, 53.1, 29.4, 27.6, 26.1, 17.1, 13.2 ppm; IR  $\nu_{\text{max}}$  3055, 1710, 1265, 1105, 744, 677  $\text{cm}^{-1}$ ; HRMS–ESI ( $m/z$ ):  $[\text{M}+\text{Na}]^+$  calcd for  $\text{C}_{16}\text{H}_{22}\text{O}_4\text{Na}$ , 301.1410; found, 301.1409; Enantiomeric excess: 92%, determined by HPLC (Daicel Chiralpak IG, hexane/isopropanol = 70/30, flow rate 0.8 mL/min,  $T = 25$  °C, 230 nm):  $t_{\text{R}} = 10.622$  min (major),  $t_{\text{R}} = 13.047$  min (minor).

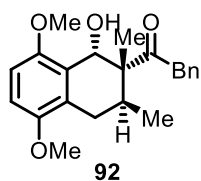

**92**

**92** (73.4 mg) was prepared according to general procedure in 69% yield. The reaction time was 90 min under 366 nm light. The product was isolated through silica gel column chromatography (6% to 20% ethyl acetate-petroleum ether) as a colorless oil:  $R_f = 0.21$  (20% ethyl acetate-petroleum ether);  $[\alpha]_{\text{D}}^{20} +21.9$  (c 0.22, DCM);  $^1\text{H}$  NMR (400 MHz,  $\text{CDCl}_3$ )  $\delta$  7.36 – 7.26 (m, 4H), 7.26 – 7.21 (m, 1H), 6.74 (d,  $J = 8.9$  Hz, 1H), 6.71 (d,  $J = 8.9$  Hz, 1H), 5.03 (s, 1H), 4.05 (d,  $J = 16.5$  Hz, 1H), 3.98 (d,  $J = 16.5$  Hz, 1H), 3.84 (s, 3H), 3.80 (s, 3H), 2.97

(dd,  $J = 18.6, 6.0$  Hz, 1H), 2.80 – 2.68 (m, 1H), 2.55 (s, 1H), 2.16 (dd,  $J = 18.6, 11.7$  Hz, 1H), 1.10 (d,  $J = 6.6$  Hz, 3H), 1.04 (s, 3H) ppm;  $^{13}\text{C}$  NMR (100 MHz,  $\text{CDCl}_3$ )  $\delta$  211.4, 151.8, 150.9, 135.3, 130.0 (2C), 128.2 (2C), 126.5, 126.2, 126.0, 109.0, 107.5, 69.7, 55.7, 55.6, 53.6, 45.6, 29.5, 26.2, 17.3, 13.2 ppm; IR  $\nu_{\text{max}}$  3055, 1710, 1483, 1317, 1267, 1107, 744, 677  $\text{cm}^{-1}$ ; HRMS–ESI ( $m/z$ ):  $[\text{M}+\text{Na}]^+$  calcd for  $\text{C}_{22}\text{H}_{26}\text{O}_4\text{Na}$ , 377.1729; found, 377.1717; Enantiomeric excess: 88%, determined by HPLC (Daicel Chiralpak IG, hexane/isopropanol = 70/30, flow rate 0.8 mL/min,  $T = 25$  °C, 230 nm):  $t_{\text{R}} = 14.045$  min (major),  $t_{\text{R}} = 15.956$  min (minor).

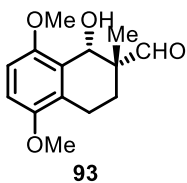

**93** (59.9 mg) was prepared according to general procedure in 83% yield. The reaction time was 90 min under 366 nm light. The product was isolated through silica gel column chromatography (6% to 20% ethyl acetate-petroleum ether) as a colorless oil:  $R_f = 0.18$  (20% ethyl acetate-petroleum ether);  $[\alpha]_D^{20} +34.9$  (c 0.37, DCM);  $^1\text{H NMR}$  (400 MHz,  $\text{CDCl}_3$ )  $\delta$  9.81 (s, 1H), 6.74 (d,  $J = 8.8$  Hz, 1H), 6.71 (d,  $J = 8.8$  Hz, 1H), 5.04 (s, 1H), 3.84 (s, 3H), 3.79 (s, 3H), 2.99 – 2.88 (m, 1H), 2.65 (s, 1H), 2.56 – 2.45 (m, 1H), 2.20 – 2.09 (m, 1H), 1.82 – 1.73 (m, 1H), 0.99 (s, 3H) ppm;  $^{13}\text{C NMR}$  (100 MHz,  $\text{CDCl}_3$ )  $\delta$  205.6, 151.9, 151.3, 126.4, 125.8, 109.1, 107.6, 67.3, 55.7, 55.6, 48.1, 21.9, 19.4, 16.3 ppm; IR  $\nu_{\text{max}}$  3055, 1697, 1280, 1265, 1105, 742  $\text{cm}^{-1}$ ; HRMS–EI ( $m/z$ ):  $[\text{M}]^+$  calcd for  $\text{C}_{14}\text{H}_{18}\text{O}_4$ , 250.1205; found, 250.1208; Enantiomeric excess: 85%, determined by HPLC (Daicel Chiralpak IG, hexane/isopropanol = 85/15, flow rate 0.8 mL/min,  $T = 25$  °C, 230 nm):  $t_R = 23.790$  min (major),  $t_R = 25.744$  min (minor).

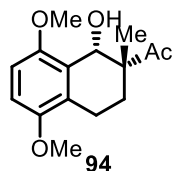

**94** (28.5 mg) was prepared according to general procedure in 36% yield. The reaction time was 90 min under 366 nm light. The product was isolated through silica gel column chromatography (6% to 20% ethyl acetate-petroleum ether) as a white solid:  $R_f = 0.12$  (20% ethyl acetate-petroleum ether); m.p. 103 - 105;  $[\alpha]_D^{20} +89.3$  (c 0.18, DCM);  $^1\text{H NMR}$  (400 MHz,  $\text{CDCl}_3$ )  $\delta$  6.73 (d,  $J = 8.8$  Hz, 1H), 6.70 (d,  $J = 8.8$  Hz, 1H), 5.90 (d,  $J = 1.9$  Hz, 1H), 3.84 (s, 3H), 3.79 (s, 3H), 2.95 (ddd,  $J = 18.6, 6.2, 1.6$  Hz, 1H), 2.54 – 2.41 (m, 2H), 2.33 (s, 3H), 2.11 (m, 1H), 1.95 – 1.84 (m, 1H), 1.00 (s, 3H) ppm;  $^{13}\text{C NMR}$  (100 MHz,  $\text{CDCl}_3$ )  $\delta$  212.7, 152.0, 151.2, 126.2, 126.0, 109.0, 107.6, 67.4, 55.7, 55.6, 49.9, 25.6, 22.3, 20.1, 18.2 ppm; IR  $\nu_{\text{max}}$  3055, 1697, 1483, 1265, 1107, 743  $\text{cm}^{-1}$ ; HRMS–EI ( $m/z$ ):  $[\text{M}]^+$  calcd for  $\text{C}_{15}\text{H}_{20}\text{O}_4$ , 264.1362; found, 264.1357; Enantiomeric excess: 91%, determined by HPLC (Daicel Chiralpak IG, hexane/isopropanol = 80/20, flow rate 0.8 mL/min,  $T = 25$  °C, 230 nm):  $t_R = 20.123$  min (major),  $t_R = 21.728$  min (minor).

## VII. NMR and HPLC Spectra

HM-V-60-1/1  
HM-V-60-1

— 4.68 — 3.82  
2.20 2.19 2.17 2.16 2.14 2.13 2.12 0.98 0.97 0.97 0.96

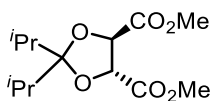

**Ketal**

Chemical Formula: C<sub>13</sub>H<sub>22</sub>O<sub>6</sub>  
500 MHz, CDCl<sub>3</sub>

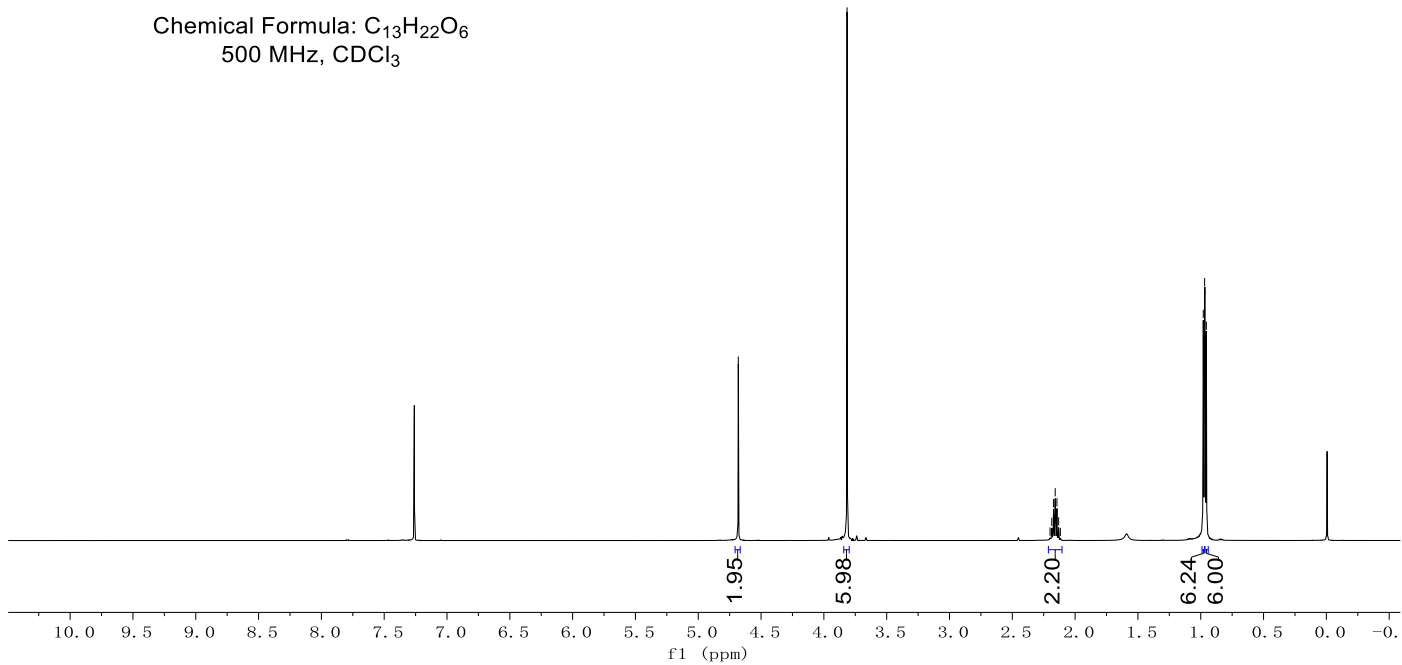

HM-V-60-1 C/2  
HM-V-60-1 C

— 168.98 — 121.41 — 78.47 — 52.67 — 34.23 — 17.17 17.12

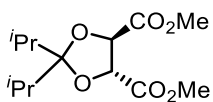

**Ketal**

Chemical Formula: C<sub>13</sub>H<sub>22</sub>O<sub>6</sub>  
125 MHz, CDCl<sub>3</sub>

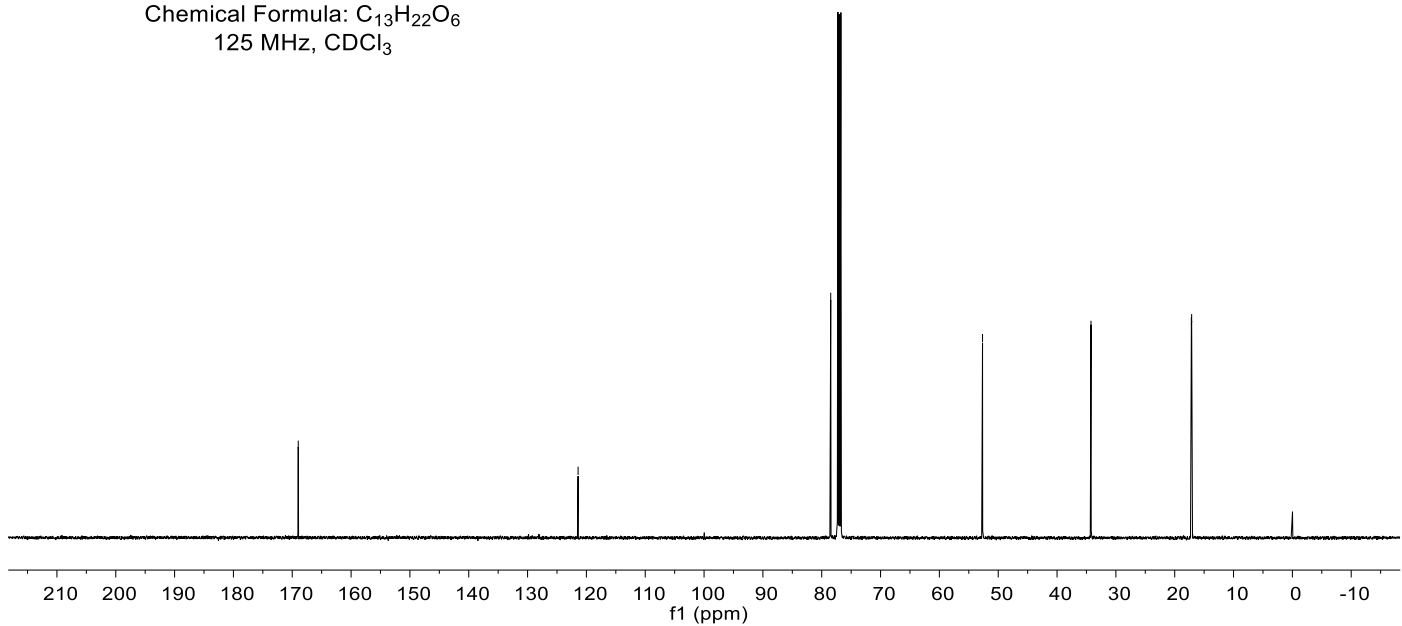

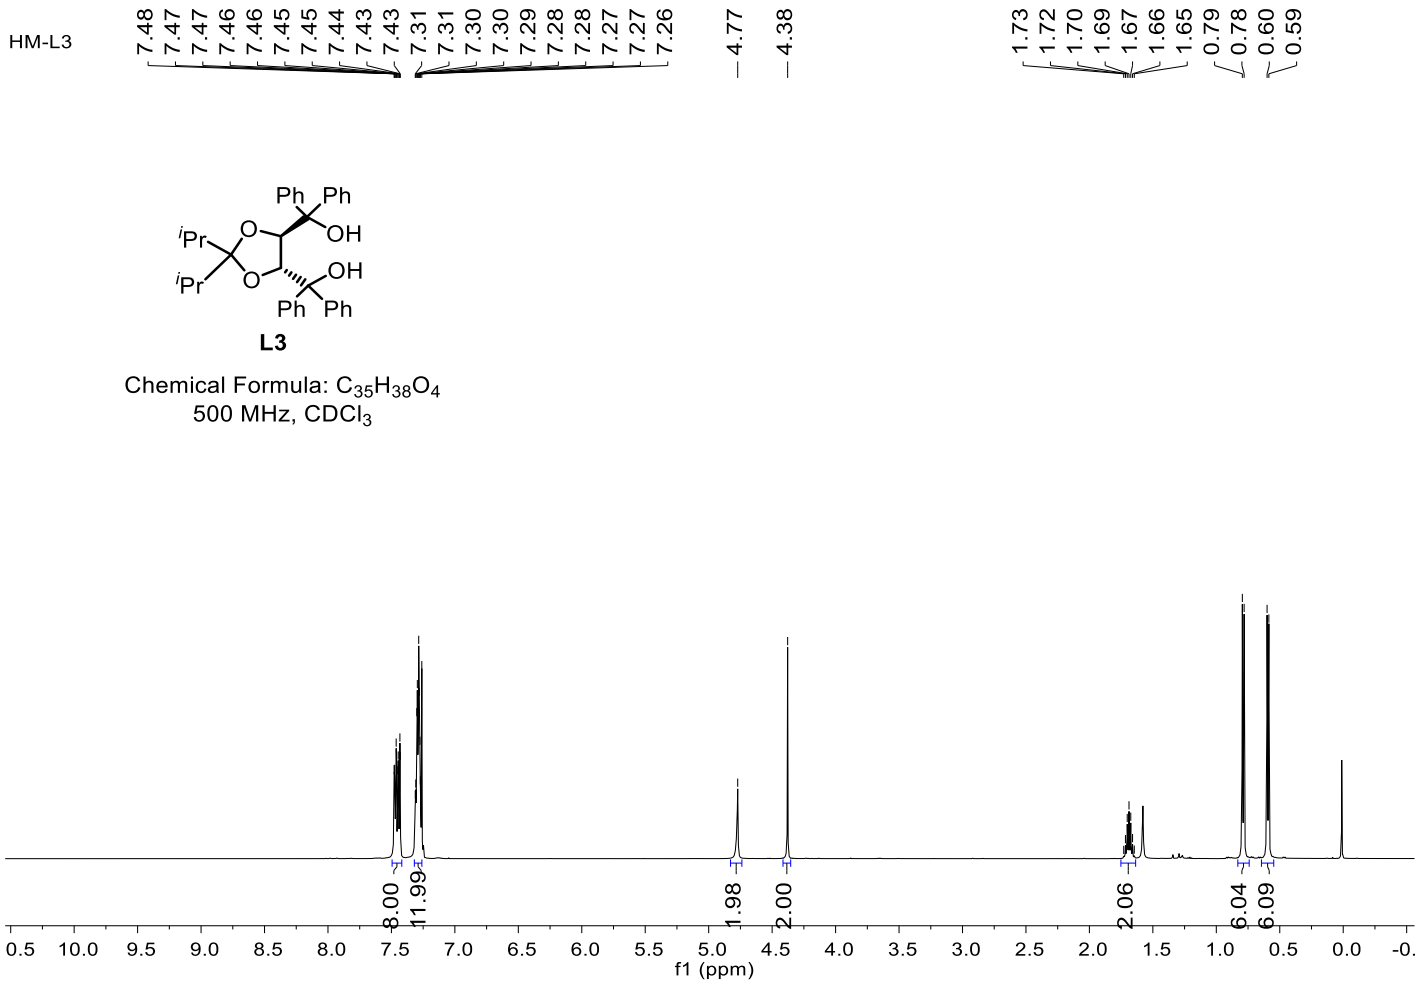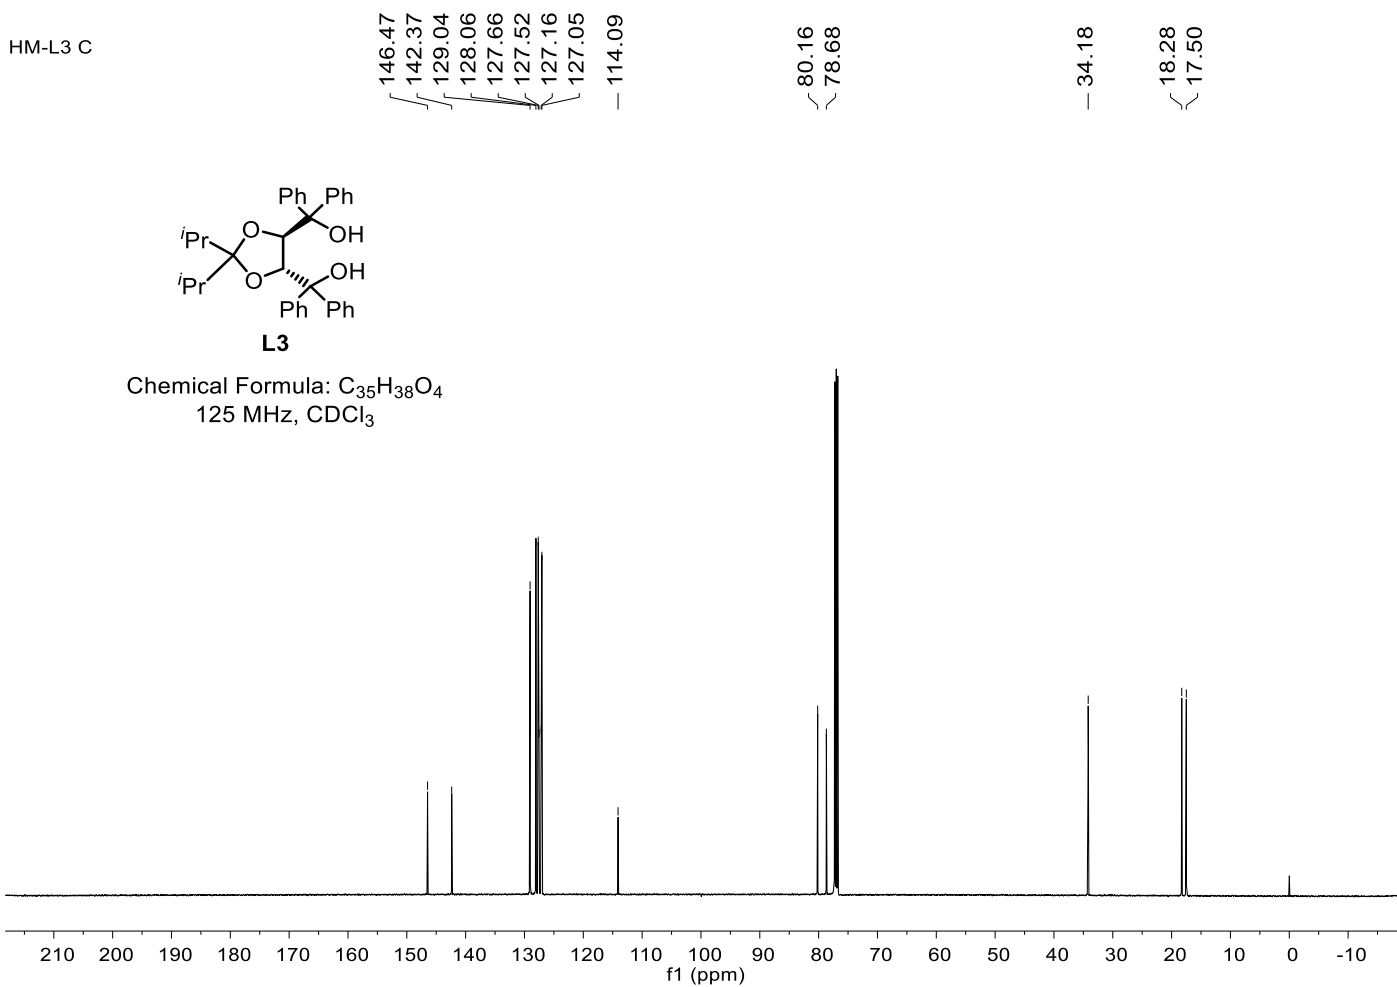

7.65  
7.64  
7.63  
7.61  
7.61  
7.59  
7.57  
7.57  
7.55  
7.55  
7.54  
7.54  
7.47  
7.45  
7.44  
7.42  
7.41  
7.37  
7.37  
7.36  
7.35  
7.34  
7.34  
5.12  
5.10  
5.09  
4.52  
4.52  
1.82  
1.81  
1.79  
1.78  
1.77  
0.86  
0.85  
0.68  
0.67

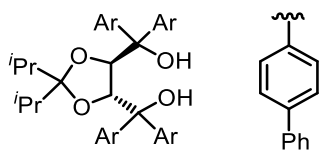

**L5**

Chemical Formula: C<sub>59</sub>H<sub>54</sub>O<sub>4</sub>  
500 MHz, CDCl<sub>3</sub>

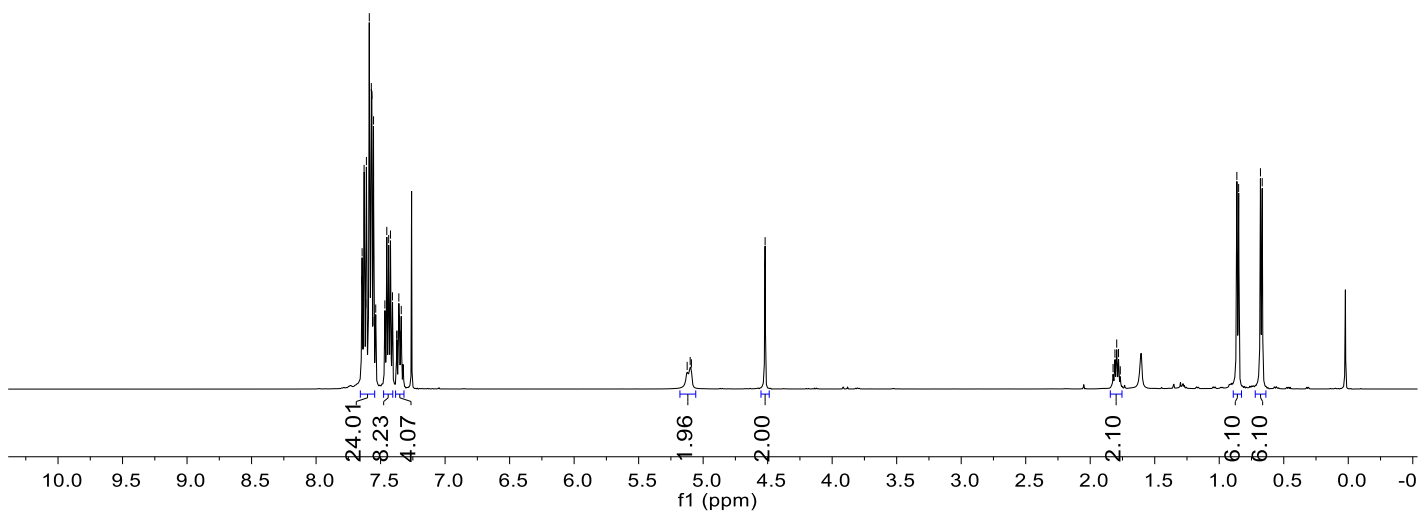

HM-L5 C  
145.33  
141.41  
140.73  
140.57  
140.32  
139.91  
129.53  
128.75  
128.72  
128.12  
127.29  
127.26  
127.04  
126.83  
125.78  
114.32  
80.34  
78.61  
34.29  
18.35  
17.58

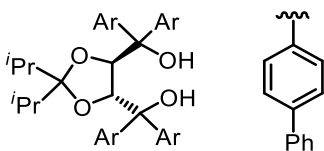

**L5**

Chemical Formula: C<sub>59</sub>H<sub>54</sub>O<sub>4</sub>  
125 MHz, CDCl<sub>3</sub>

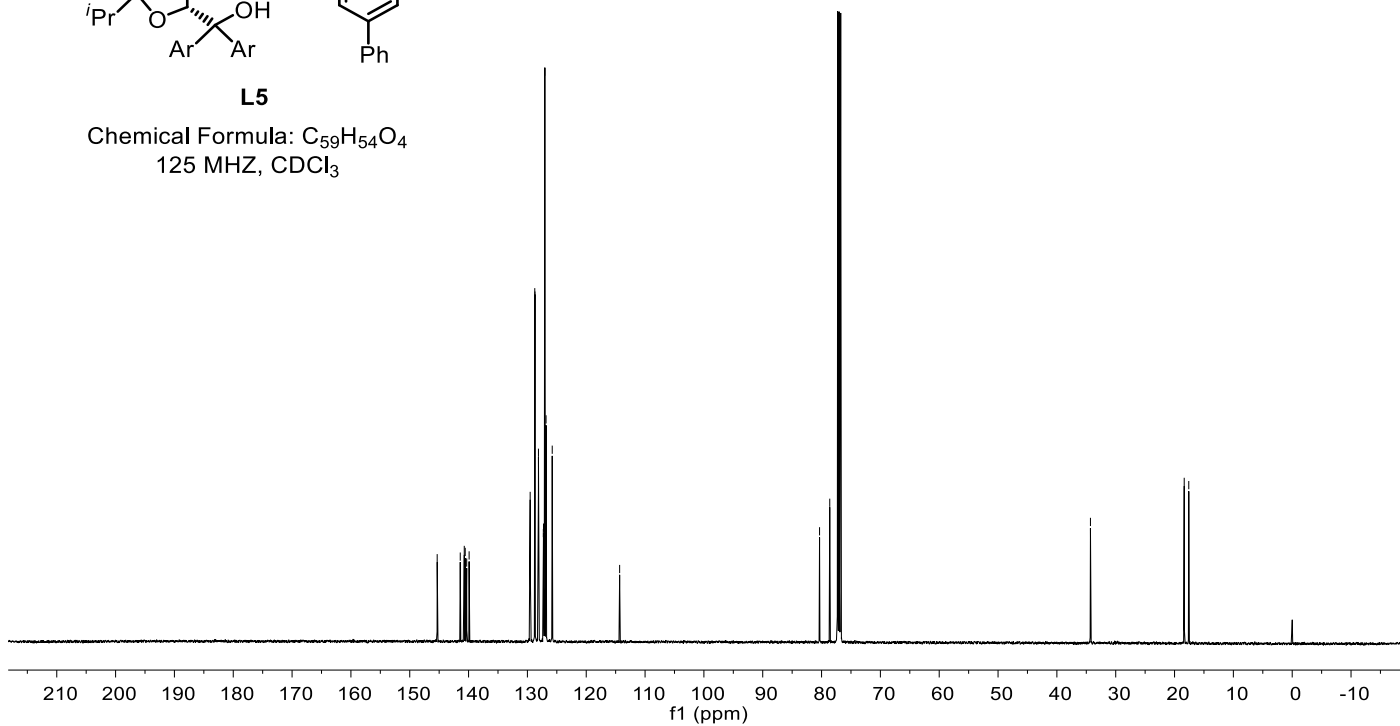

7.83  
7.82  
7.82  
7.81  
7.81  
7.56  
7.56  
7.55  
7.55  
7.55  
7.54  
7.54  
7.53  
7.53  
7.52  
7.52  
7.52  
7.51  
7.51  
7.51  
7.50  
7.49  
7.49  
7.49  
7.41  
7.40  
7.39  
7.39  
7.38  
7.37  
7.36  
7.36  
7.35  
7.35  
7.34  
7.32  
7.31  
7.31  
7.30  
7.29  
7.29  
4.82  
4.82  
4.81  
4.62  
1.74  
0.74  
0.73  
0.59  
0.57

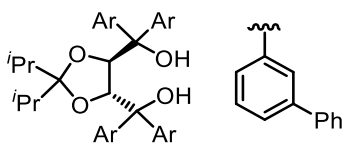

**L6**

Chemical Formula:  $C_{59}H_{54}O_4$   
500 MHz,  $CDCl_3$

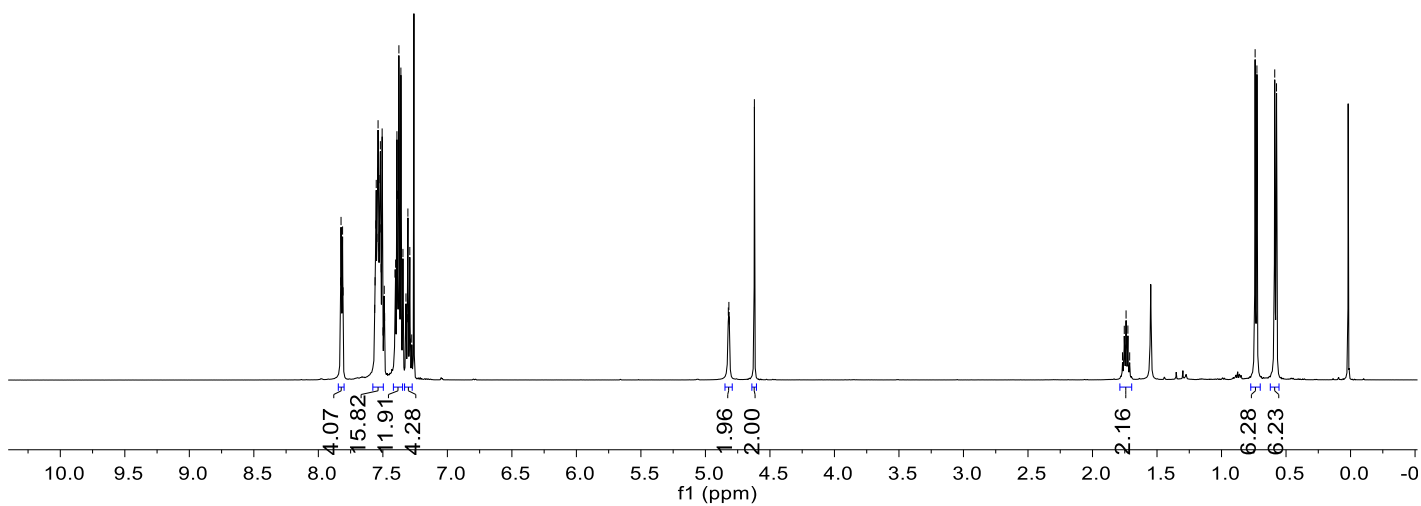

HM-L6 C  
146.82  
142.85  
141.21  
141.12  
140.96  
140.06  
128.65  
128.64  
128.61  
128.05  
127.71  
127.66  
127.19  
127.17  
127.11  
126.65  
126.46  
126.40  
126.19  
114.35  
80.70  
78.88  
34.34  
18.16  
17.47

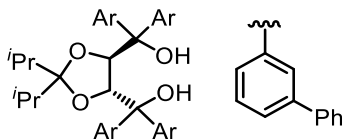

**L6**

Chemical Formula:  $C_{59}H_{54}O_4$   
125 MHz,  $CDCl_3$

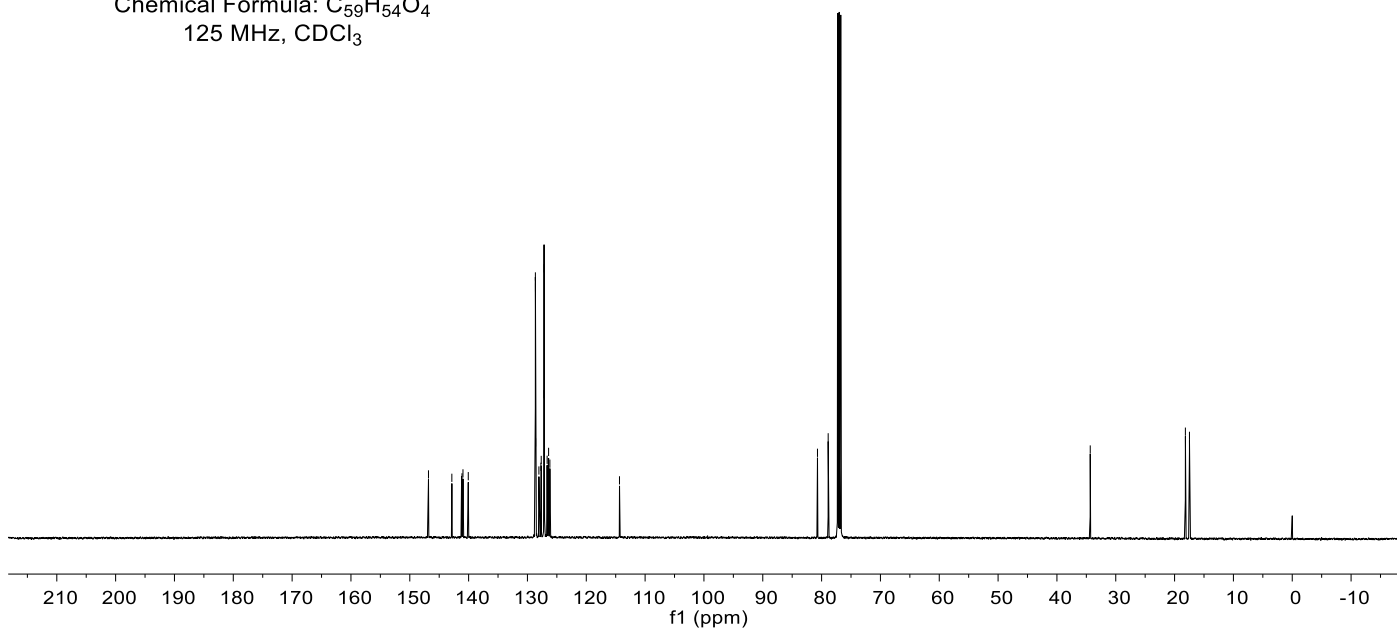

HM-L  
7.90  
7.89  
7.88  
7.88  
7.74  
7.74  
7.73  
7.72  
7.72  
7.59  
7.59  
7.59  
7.58  
7.58  
7.57  
7.55  
7.53  
7.37  
7.36  
7.35  
7.34  
7.34  
7.32  
7.31  
7.30  
7.29  
7.29  
7.28  
7.28  
5.07  
4.88  
4.88  
4.87  
4.87

1.81  
1.79  
1.78  
1.76  
1.75  
0.70  
0.68  
0.57  
0.55

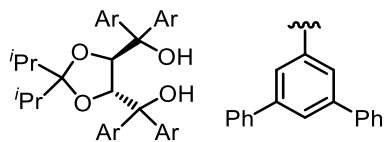

**L7**

Chemical Formula: C<sub>83</sub>H<sub>70</sub>O<sub>4</sub>  
500 MHz, CDCl<sub>3</sub>

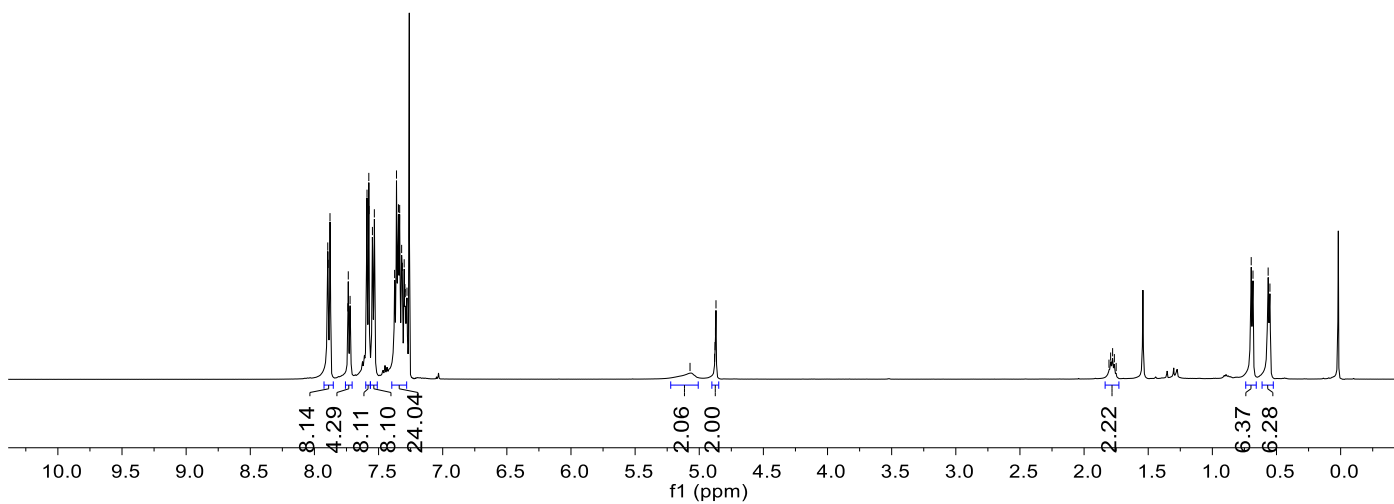

HM-L7 C

147.27  
143.42  
141.59  
141.09  
141.07  
140.80  
128.68  
128.65  
127.32  
127.27  
127.25  
126.75  
125.57  
125.45  
125.40  
114.65  
81.16  
79.08  
34.48  
18.07  
17.46

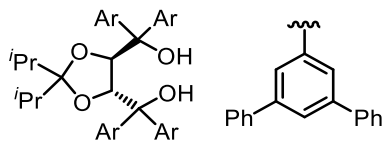

**L7**

Chemical Formula: C<sub>83</sub>H<sub>70</sub>O<sub>4</sub>  
125 MHz, CDCl<sub>3</sub>

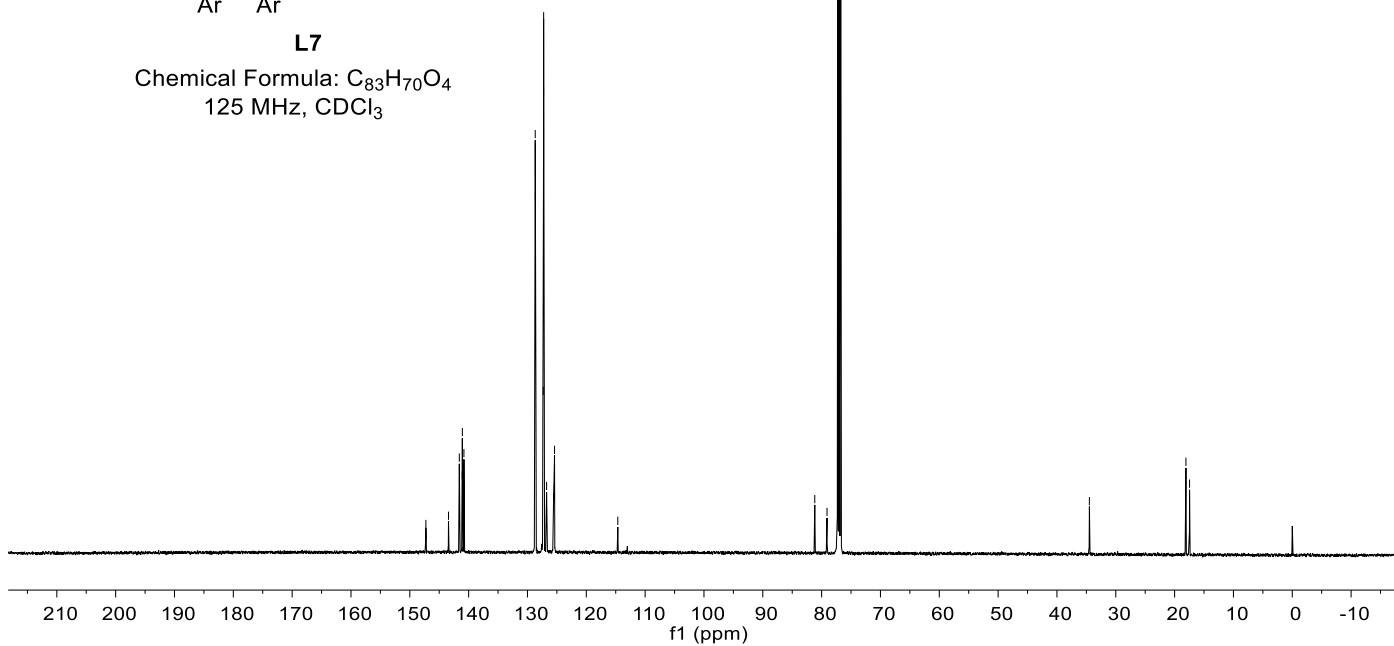



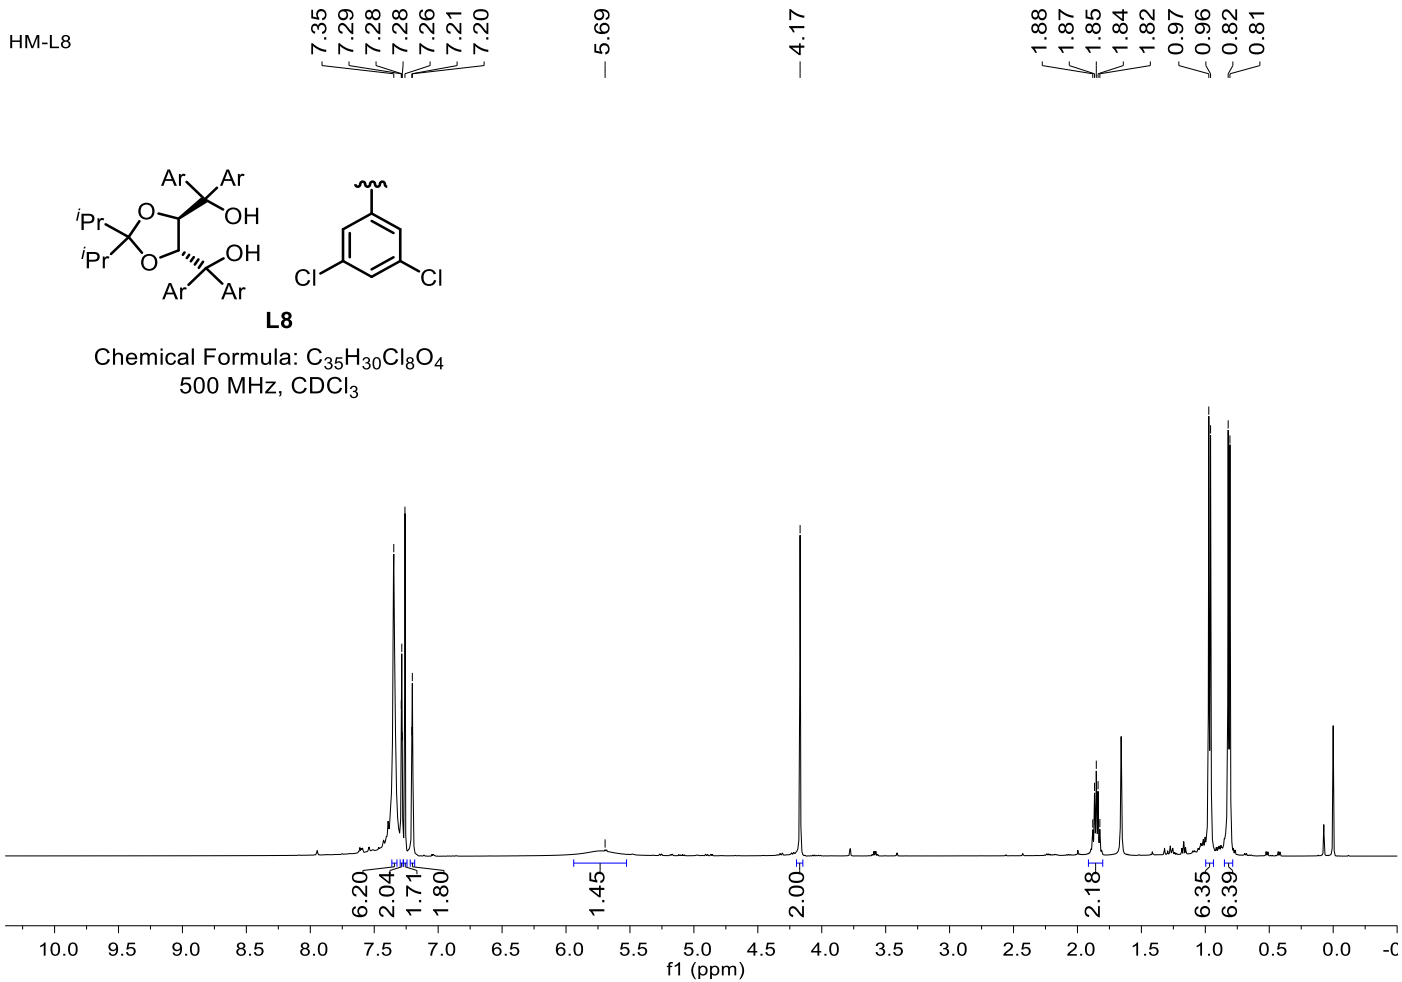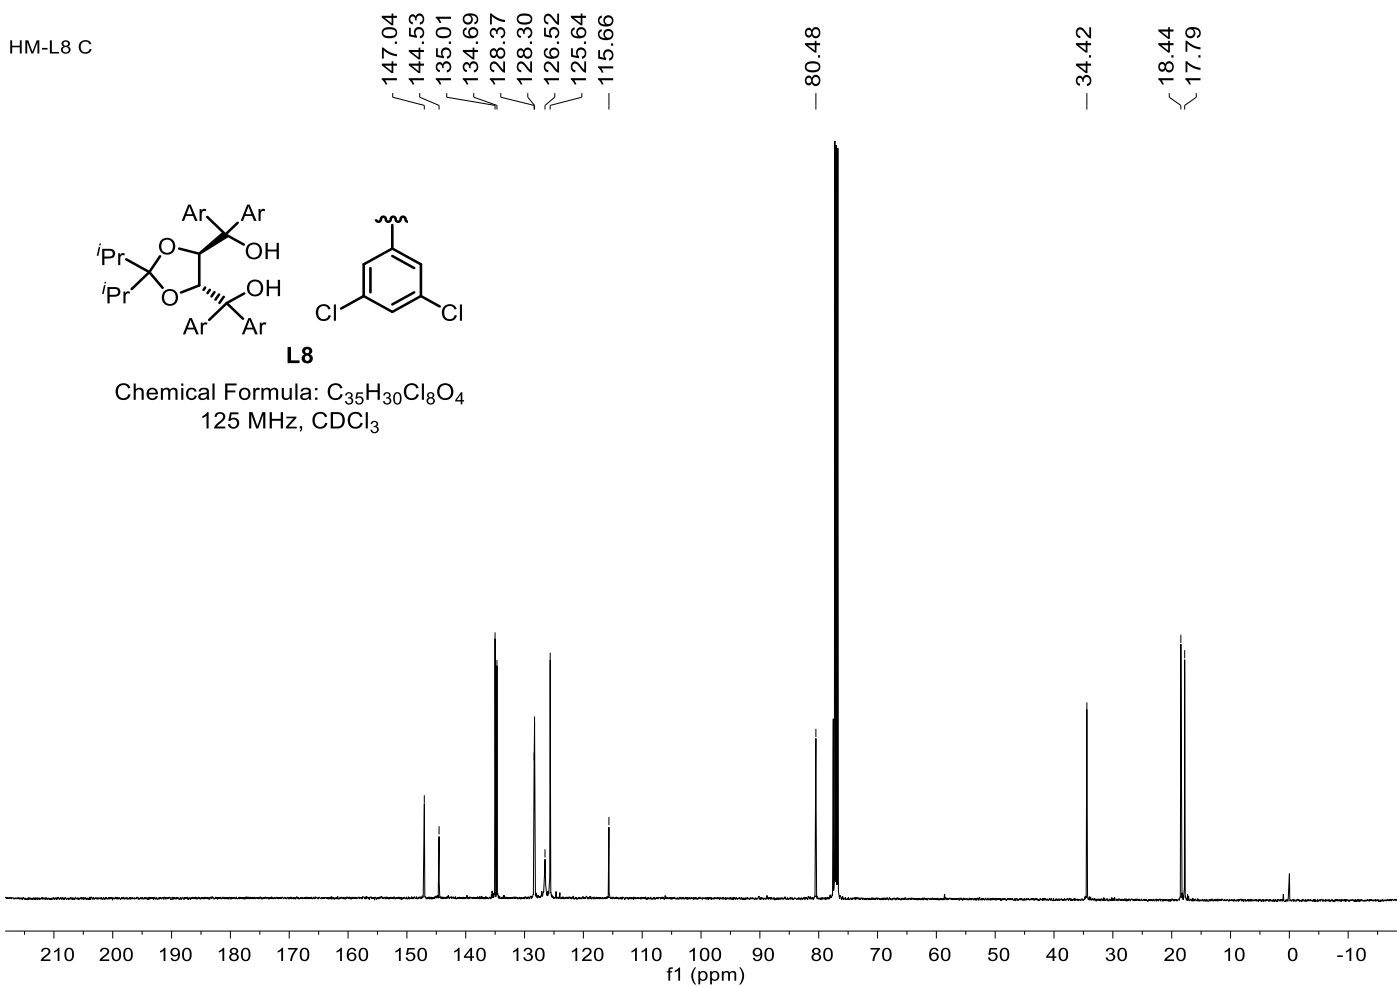

HM-L9\_30.fid  
HM-L9

8.04  
7.96  
7.96  
7.92  
7.86

— 5.68

— 4.23

1.84  
1.82  
1.80  
1.80  
1.78  
1.77  
0.83  
0.81  
0.67  
0.65

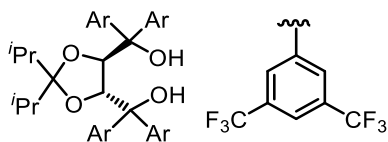

**L9**

Chemical Formula: C<sub>43</sub>H<sub>30</sub>F<sub>24</sub>O<sub>4</sub>  
400 MHz, CDCl<sub>3</sub>

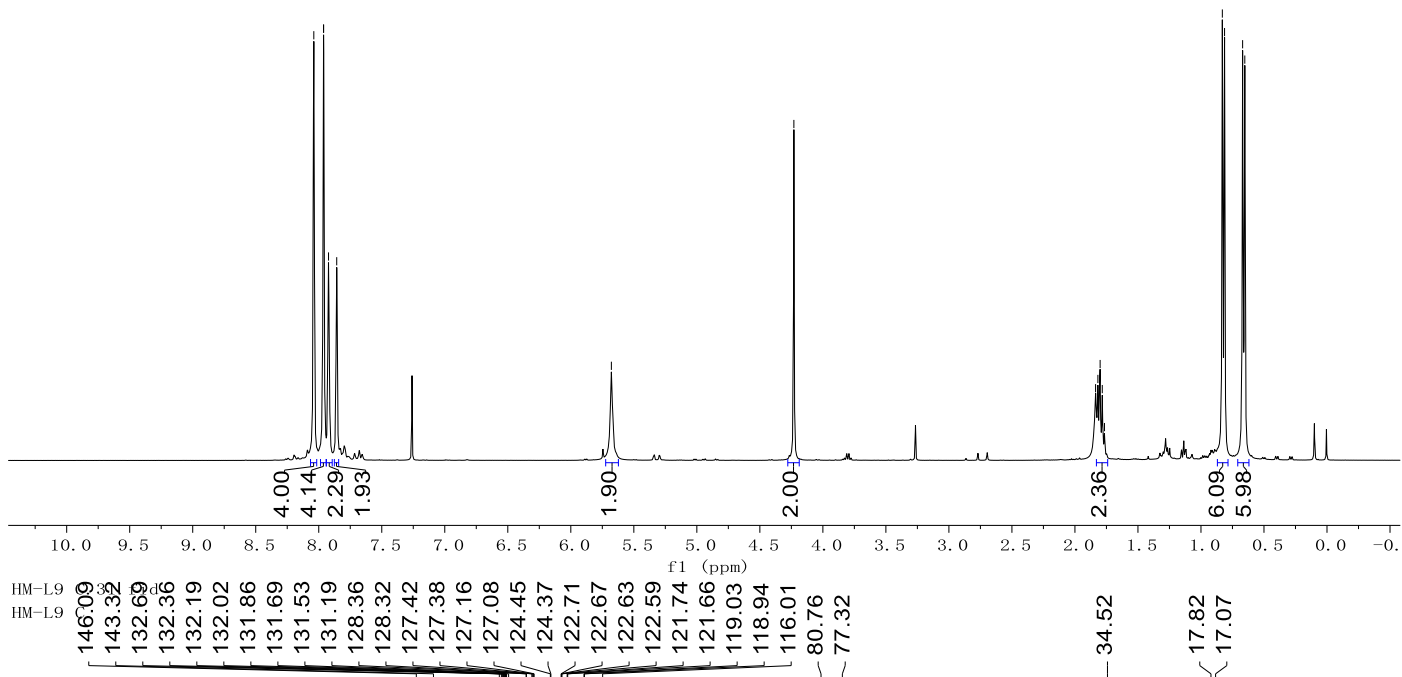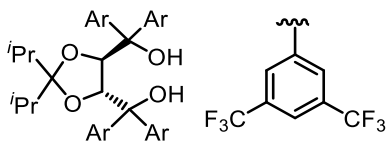

**L9**

Chemical Formula: C<sub>43</sub>H<sub>30</sub>F<sub>24</sub>O<sub>4</sub>  
100 MHz, CDCl<sub>3</sub>

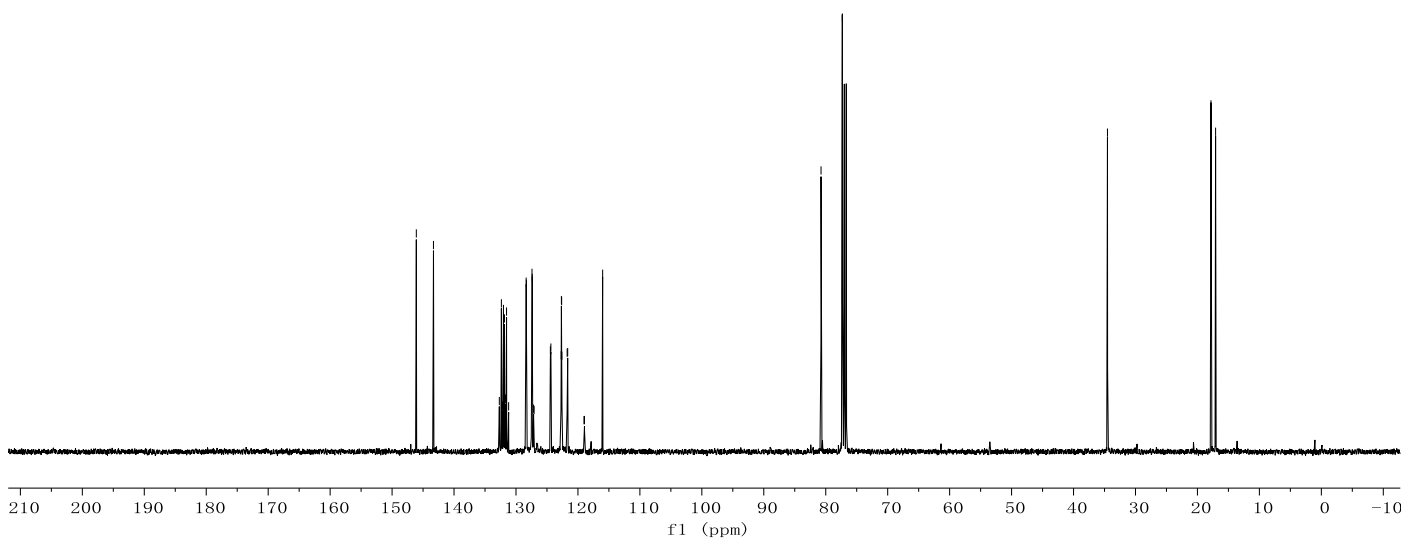

HM-L9A

8.08  
7.95  
7.87  
7.85

4.77  
4.76  
4.76  
4.75  
4.35  
1.69  
1.68  
1.68  
1.67  
1.66  
1.65  
1.63  
1.61  
1.61  
1.59  
1.58  
1.57  
1.56  
1.56  
1.55  
1.55  
1.54  
1.53  
1.52  
1.51  
1.50  
1.48  
1.47  
1.45  
1.45

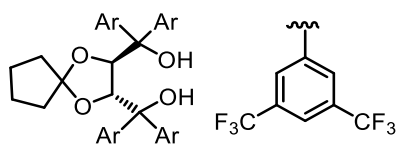

**L9A**

Chemical Formula:  $C_{41}H_{24}F_{24}O_4$   
500 MHz,  $CDCl_3$

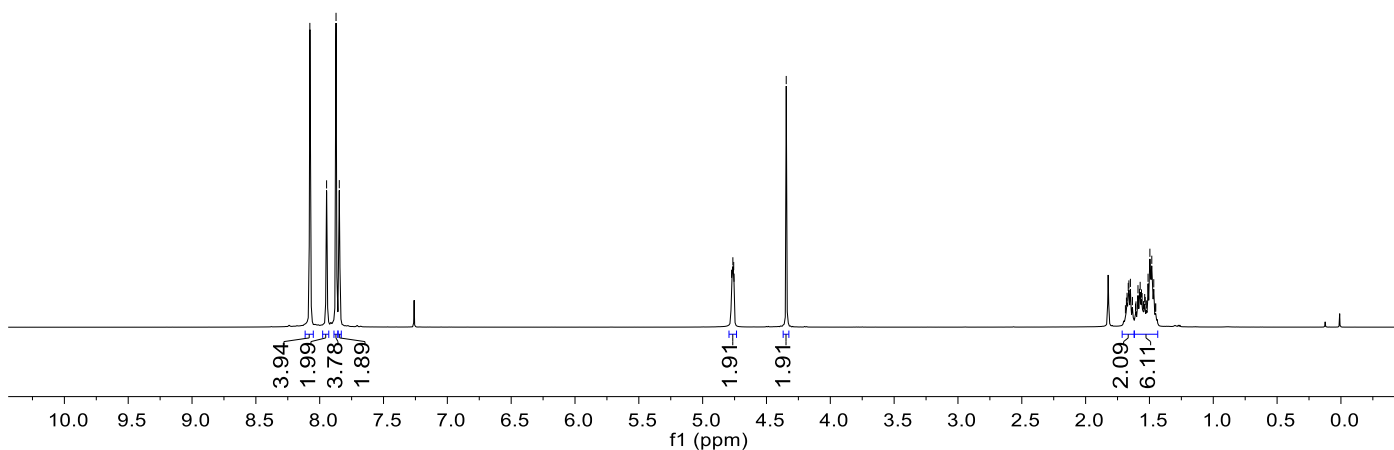

145.80  
145.47  
132.63  
132.36  
132.19  
132.10  
131.93  
131.83  
131.66  
131.39  
128.16  
128.13  
128.10  
128.07  
127.50  
127.47  
127.44  
127.41  
126.41  
126.24  
124.24  
124.07  
122.83  
122.80  
122.77  
122.74  
122.70  
122.67  
122.64  
122.61  
122.58  
122.07  
121.90  
120.84  
119.90  
119.74  
81.10  
77.13  
36.69  
22.44

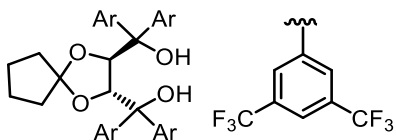

**L9A**

Chemical Formula:  $C_{41}H_{24}F_{24}O_4$   
125 MHz,  $CDCl_3$

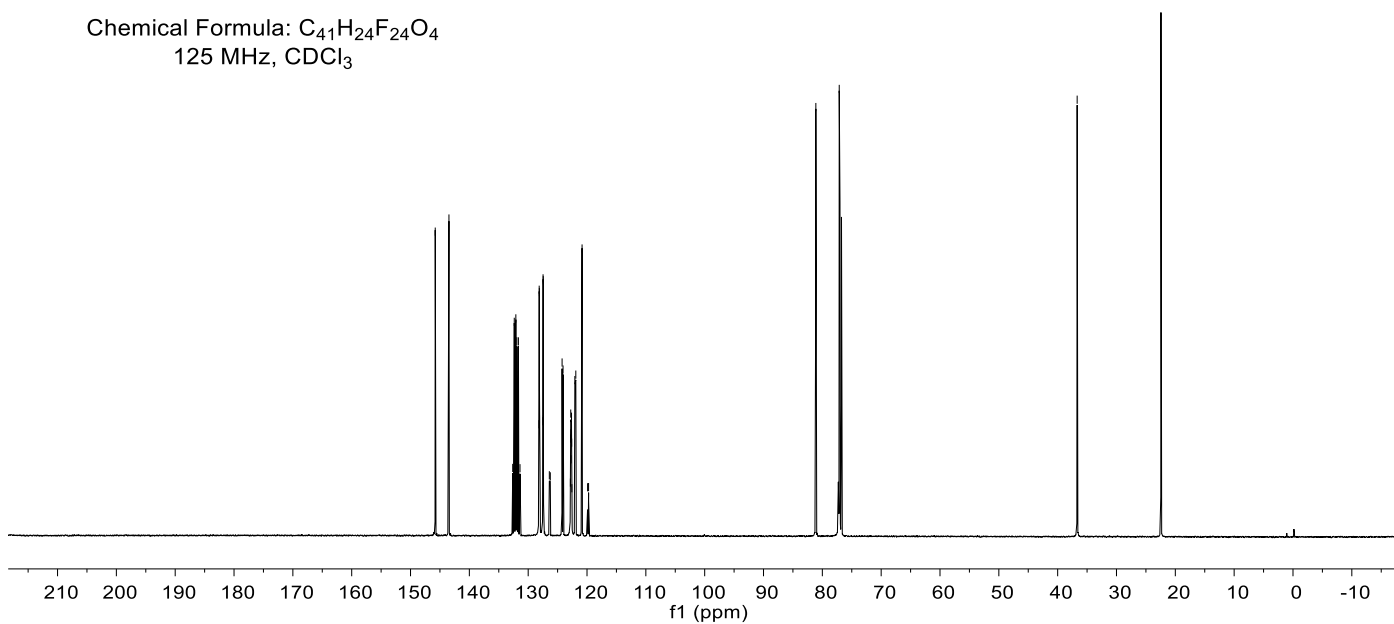

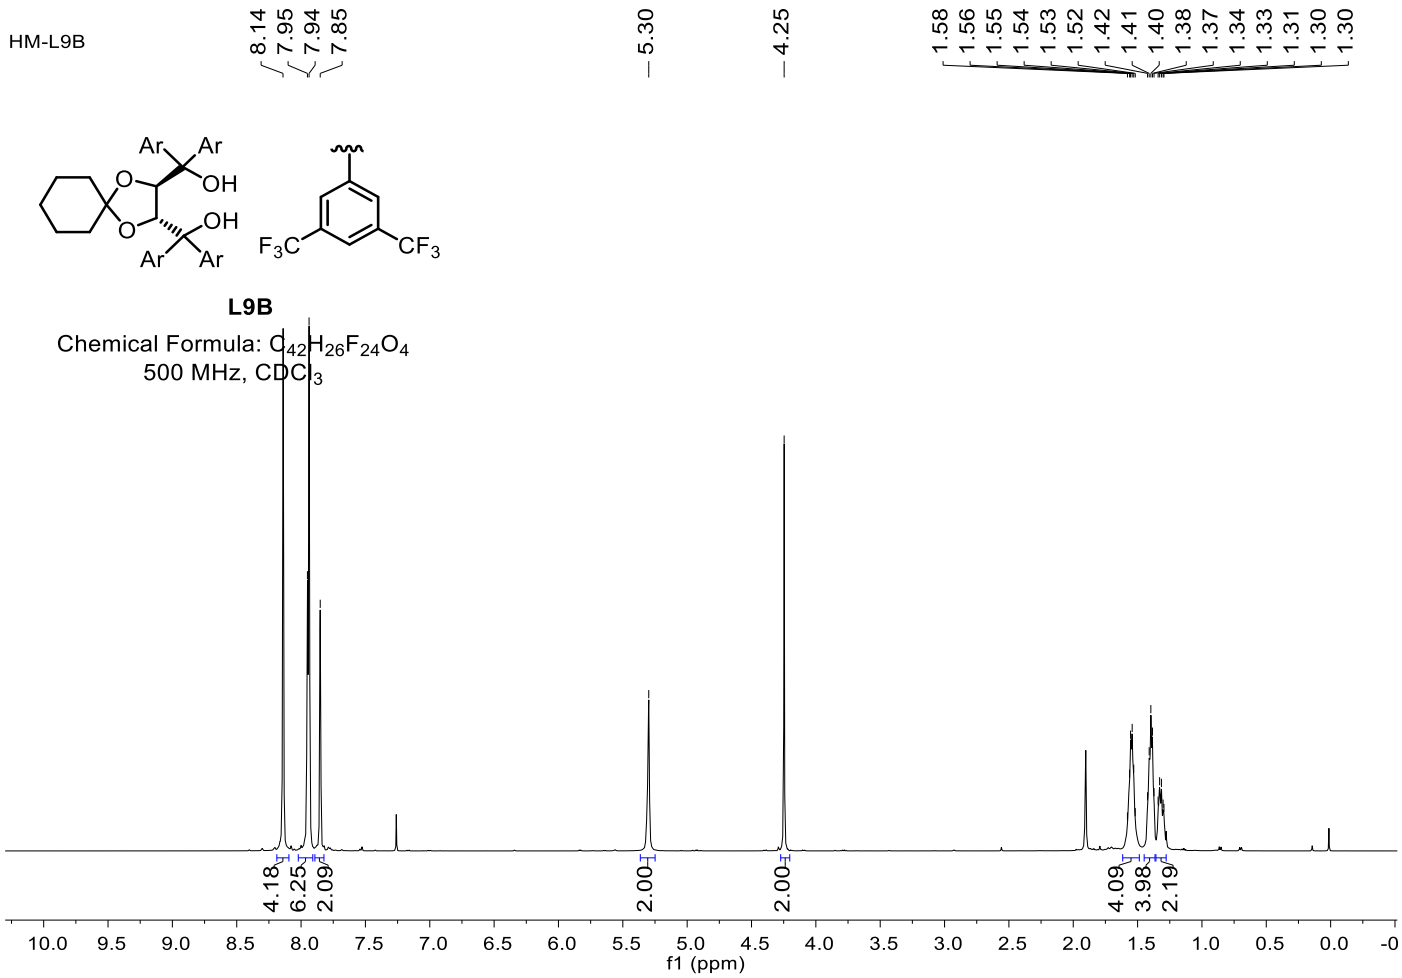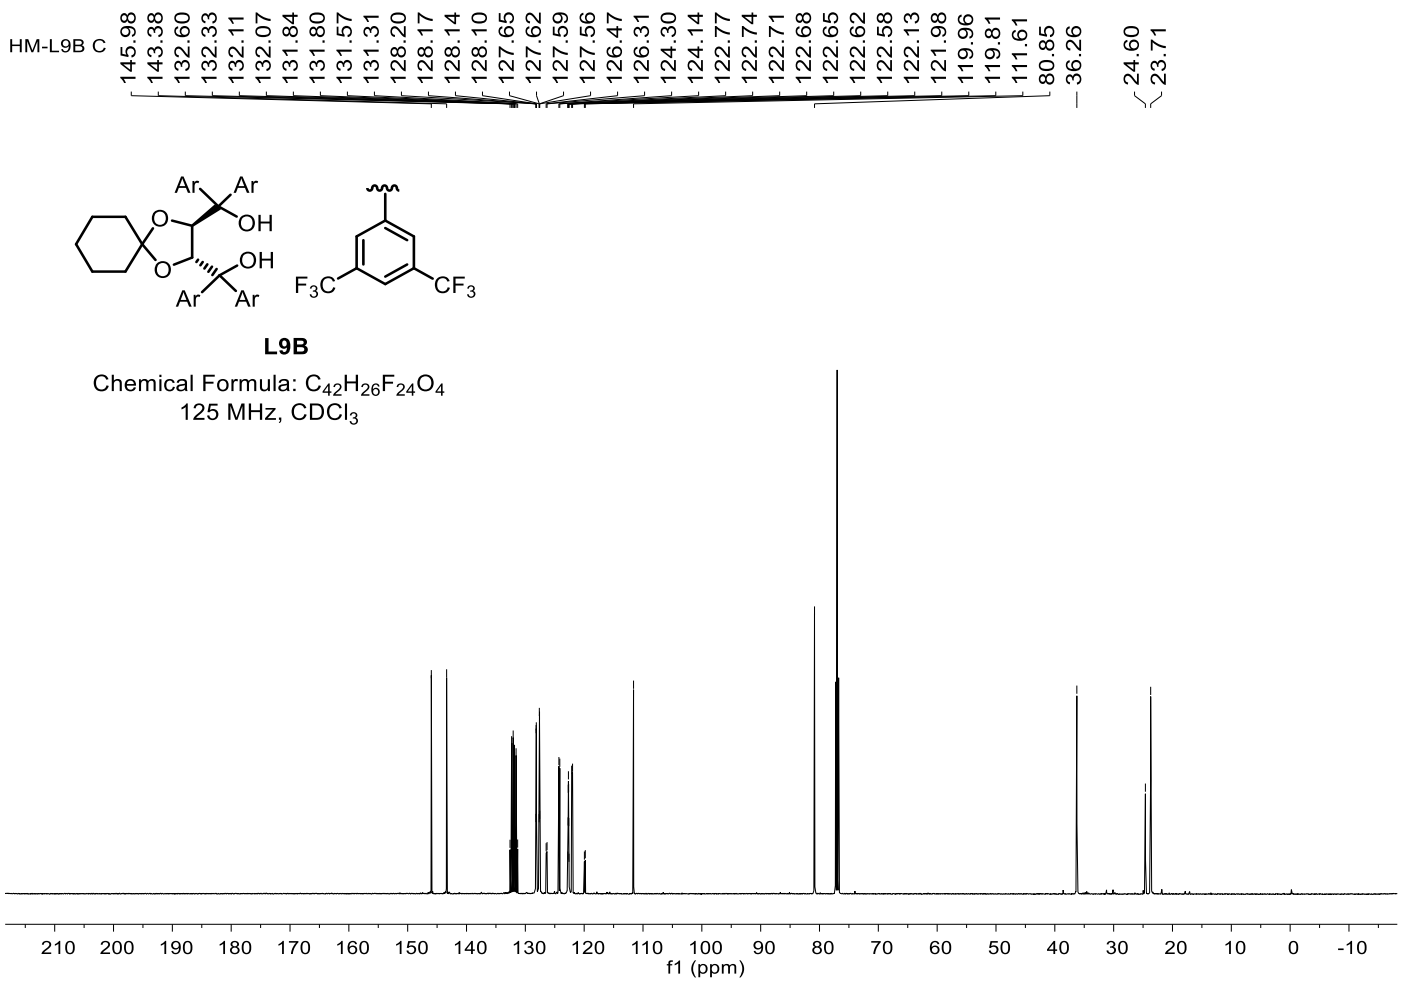

HM-L9C

|      |      |      |      |      |      |      |      |      |      |      |      |      |      |      |      |      |      |      |      |      |      |      |      |      |      |      |      |      |      |      |      |      |      |      |      |      |      |      |      |      |      |      |      |
|------|------|------|------|------|------|------|------|------|------|------|------|------|------|------|------|------|------|------|------|------|------|------|------|------|------|------|------|------|------|------|------|------|------|------|------|------|------|------|------|------|------|------|------|
| 8.10 | 8.05 | 8.05 | 7.97 | 7.96 | 7.95 | 7.94 | 7.94 | 7.87 | 5.07 | 4.29 | 4.25 | 1.79 | 1.77 | 1.77 | 1.76 | 1.75 | 1.74 | 1.65 | 1.64 | 1.63 | 1.62 | 1.61 | 1.60 | 1.59 | 1.58 | 1.48 | 1.47 | 1.46 | 1.44 | 1.43 | 1.42 | 1.41 | 1.40 | 1.39 | 1.32 | 1.31 | 1.31 | 1.30 | 1.29 | 1.27 | 0.69 | 0.67 | 0.59 |
|------|------|------|------|------|------|------|------|------|------|------|------|------|------|------|------|------|------|------|------|------|------|------|------|------|------|------|------|------|------|------|------|------|------|------|------|------|------|------|------|------|------|------|------|

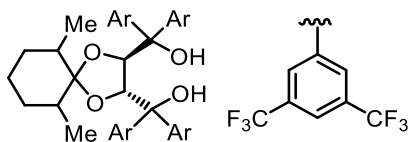

**L9C**

Chemical Formula: C<sub>44</sub>H<sub>30</sub>F<sub>24</sub>O<sub>4</sub>  
500 MHz, CDCl<sub>3</sub>

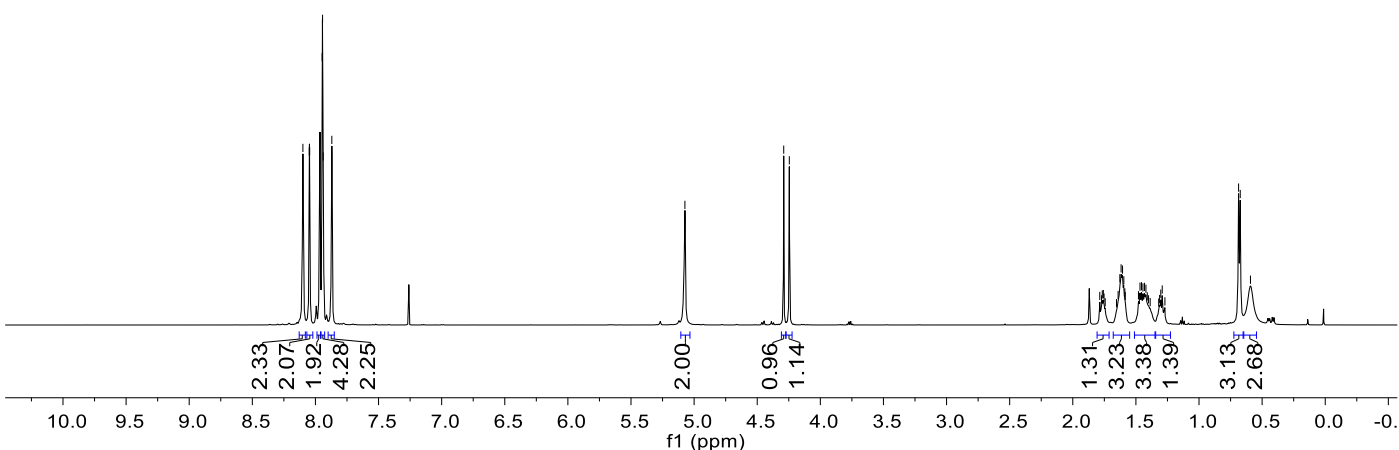

146.05  
145.97  
143.31  
143.20  
132.73  
132.47  
132.20  
131.97  
131.93  
131.89  
131.71  
131.62  
128.29  
128.26  
128.23  
128.20  
128.17  
127.51  
127.48  
127.45  
127.40  
127.37  
127.34  
126.29  
124.23  
124.22  
124.12  
122.90  
122.87  
122.84  
122.81  
122.78  
122.74  
122.72  
122.69  
122.07  
122.05  
121.95  
119.78  
114.59  
114.50  
80.72  
77.50  
77.22  
35.43  
31.15  
30.84  
19.27  
18.84  
14.27  
13.17

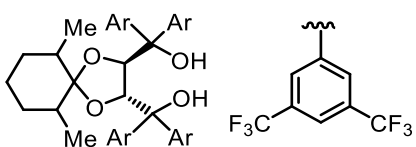

**L9C**

Chemical Formula: C<sub>44</sub>H<sub>30</sub>F<sub>24</sub>O<sub>4</sub>  
125 MHz, CDCl<sub>3</sub>

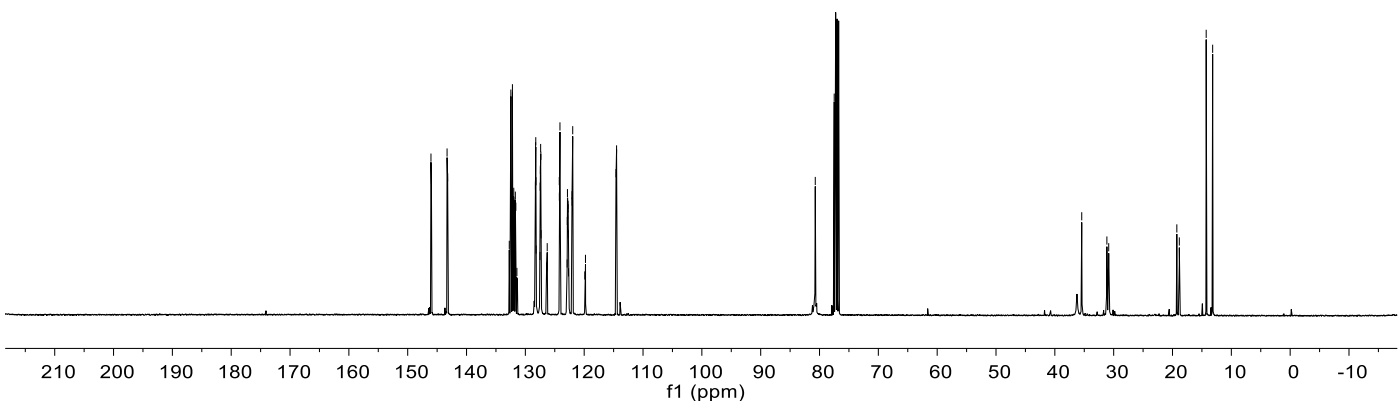

HM-L9D

8.11  
7.93  
7.86  
7.83

5.09  
5.07  
5.06  
5.05

4.09

1.63  
1.62  
1.62  
1.60  
1.59  
1.57  
1.52  
1.52  
1.50  
1.49  
1.48  
1.46  
1.45  
1.43  
1.42  
1.41  
1.40  
1.39  
1.38

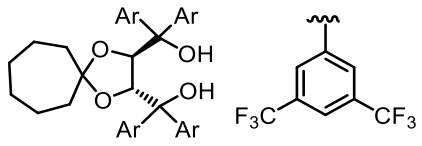

**L9D**

Chemical Formula: C<sub>43</sub>H<sub>28</sub>F<sub>24</sub>O<sub>4</sub>  
500 MHz, CDCl<sub>3</sub>

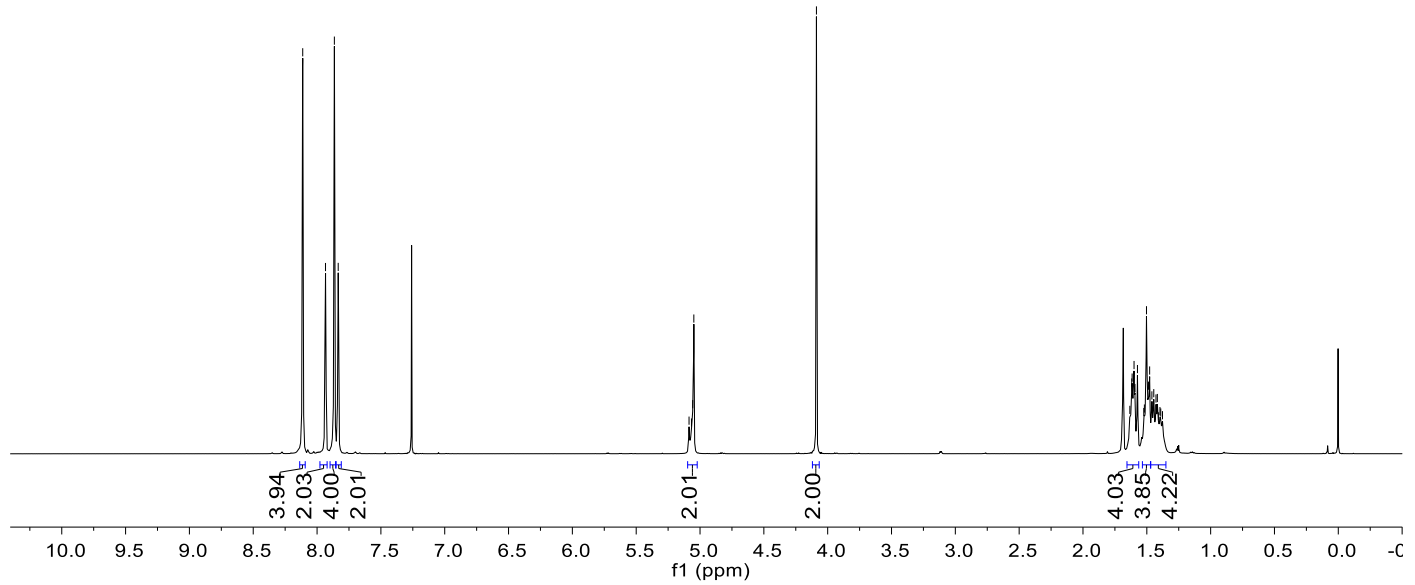

HM-L9D

145.63  
143.27  
132.48  
132.21  
132.04  
131.95  
131.78  
131.68  
131.51  
131.24  
127.99  
127.96  
127.93  
127.90  
127.52  
127.49  
127.46  
127.43  
126.35  
126.20  
124.18  
124.03  
122.73  
122.70  
122.67  
122.64  
122.61  
122.58  
122.55  
122.52  
122.01  
121.86  
119.84  
119.69  
114.63  
80.58  
39.50

28.08  
21.40

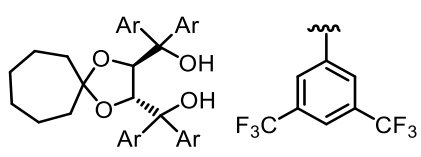

**L9D**

Chemical Formula: C<sub>43</sub>H<sub>28</sub>F<sub>24</sub>O<sub>4</sub>  
125 MHz, CDCl<sub>3</sub>

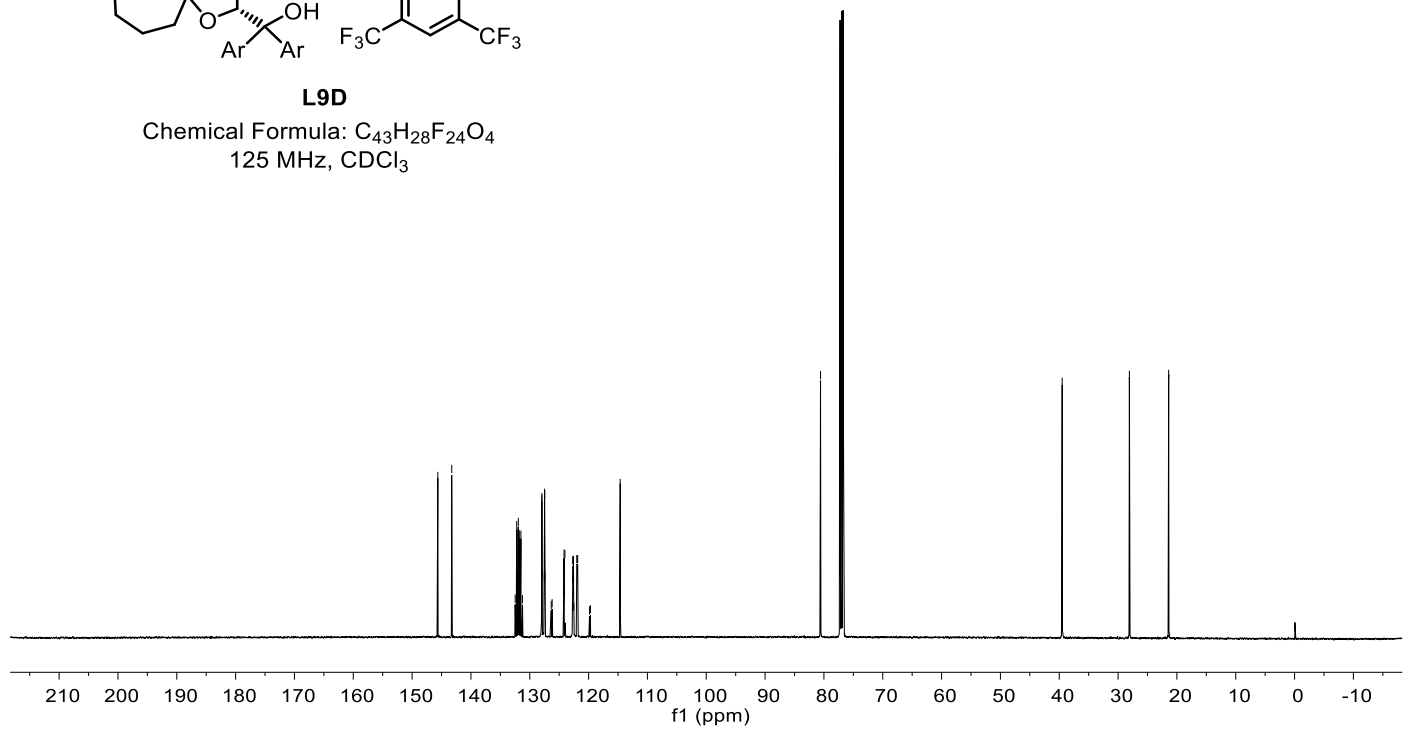

HM-L10

7.44  
7.43  
7.43  
7.31  
7.31  
7.31  
7.30  
7.27

4.65  
4.57

1.80  
1.79  
1.79  
1.78  
1.77  
1.76  
1.76  
1.28  
1.28  
1.27  
1.24  
1.24  
1.24  
0.60  
0.58  
0.42  
0.42  
0.41  
0.40

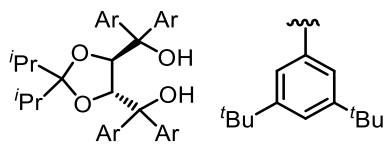

**L10**

Chemical Formula: C<sub>67</sub>H<sub>102</sub>O<sub>4</sub>  
500 MHz, CDCl<sub>3</sub>

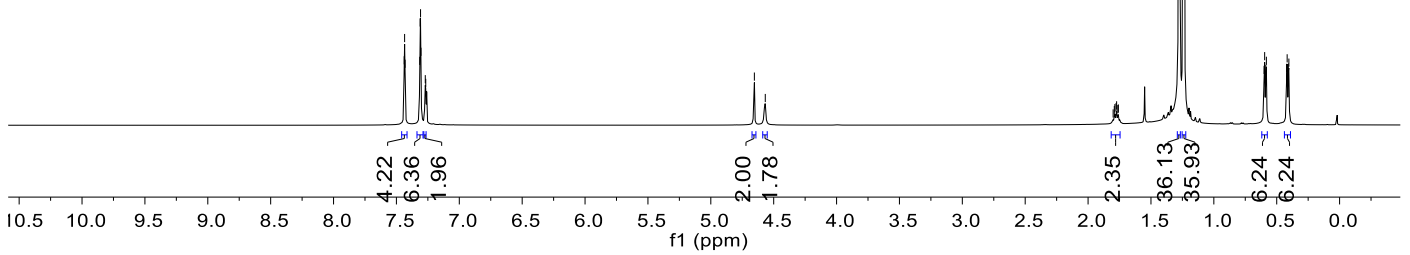

HM-L10 C

149.60  
148.80  
145.88  
142.07

123.72  
121.96  
120.73  
120.69  
113.46

81.33  
79.56

34.93  
34.79  
34.59  
31.54  
31.49  
18.01  
17.24

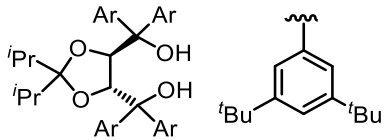

**L10**

Chemical Formula: C<sub>67</sub>H<sub>102</sub>O<sub>4</sub>  
125 MHz, CDCl<sub>3</sub>

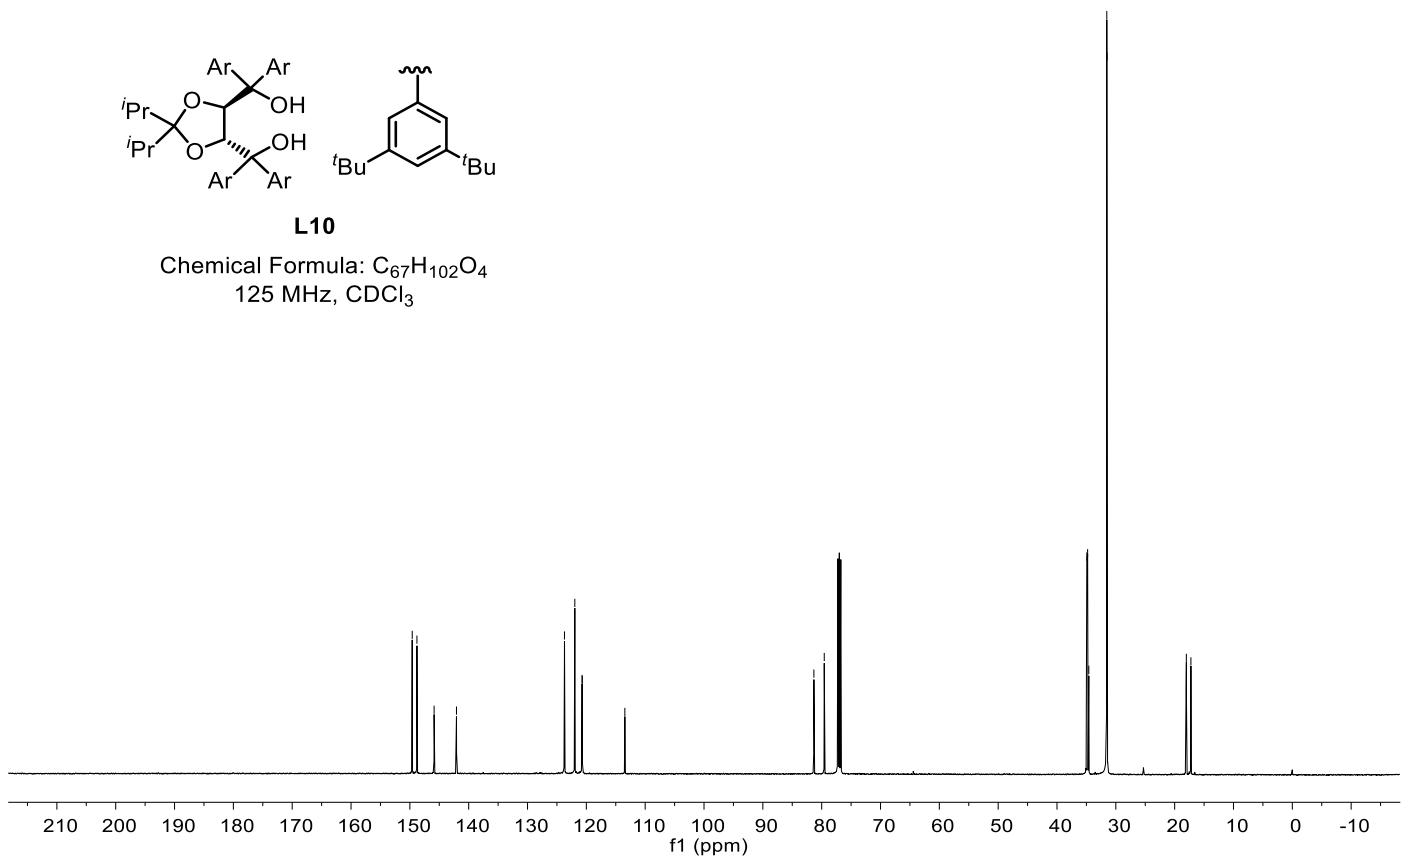

HM-L11

6.68  
6.67  
6.66  
6.65  
6.35  
6.35  
6.34  
6.32  
6.31  
6.31  
5.04  
4.99  
4.99  
- 4.41  
3.69  
3.67  
1.82  
1.80  
1.79  
1.78  
1.76  
1.71  
0.83  
0.82  
0.69  
0.67

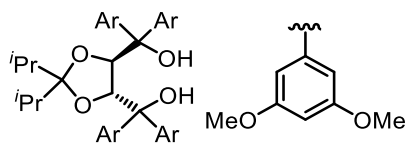

**L11**

Chemical Formula: C<sub>43</sub>H<sub>54</sub>O<sub>12</sub>  
500 MHz, CDCl<sub>3</sub>

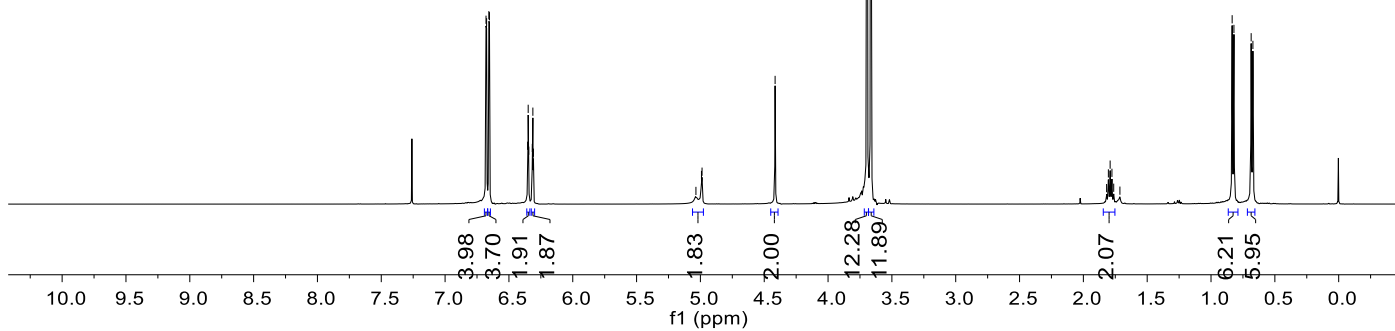

HM-L11 C

160.17  
159.61  
148.19  
144.74  
113.89  
107.49  
105.81  
99.47  
99.06  
80.73  
78.59  
55.27  
55.17  
34.29  
18.26  
17.55

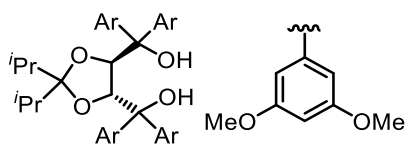

**L11**

Chemical Formula: C<sub>43</sub>H<sub>54</sub>O<sub>12</sub>  
125 MHz, CDCl<sub>3</sub>

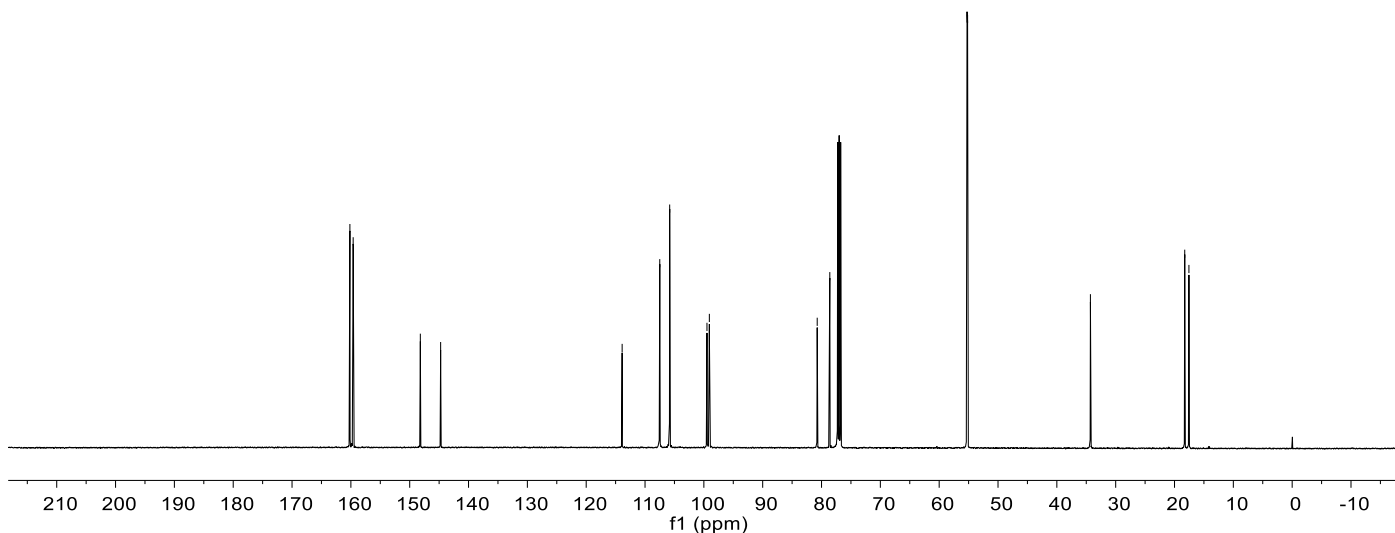



6.73  
6.71  
6.69  
6.66  
4.90  
3.83  
3.82  
3.80  
2.82  
2.81  
2.78  
2.76  
2.68  
2.67  
2.67  
2.66  
2.66  
2.65  
2.63  
2.60  
2.59  
2.56  
2.31  
2.20  
2.20  
1.99  
1.98  
1.96  
1.82  
1.82  
1.81  
1.79  
1.78  
1.78  
1.57  
1.56  
1.55  
1.53  
1.52  
1.51  
1.50  
1.50  
1.49  
1.49  
1.25  
1.24  
1.21  
1.21  
1.13  
1.10

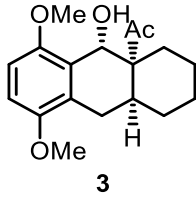

Chemical Formula:  $C_{18}H_{24}O_4$   
400 MHz,  $CDCl_3$

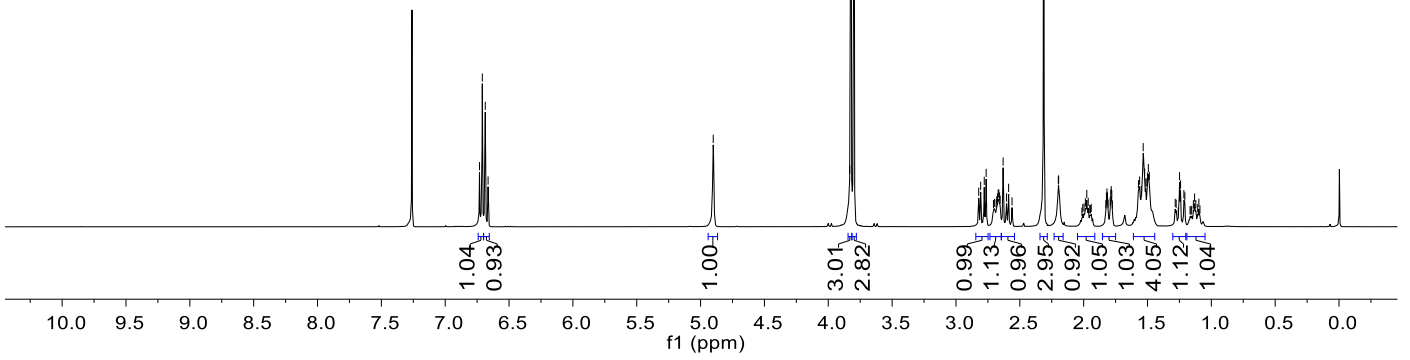

HM-21139B-1 C  
— 211.29

151.57  
151.11

125.86  
125.74

108.78  
107.11

— 68.38

55.59  
55.56  
55.52  
54.23

27.10  
26.63  
26.30  
26.27  
26.15  
24.65  
22.74  
20.08

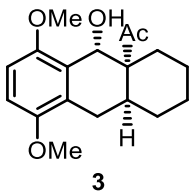

Chemical Formula:  $C_{18}H_{24}O_4$   
100 MHz,  $CDCl_3$

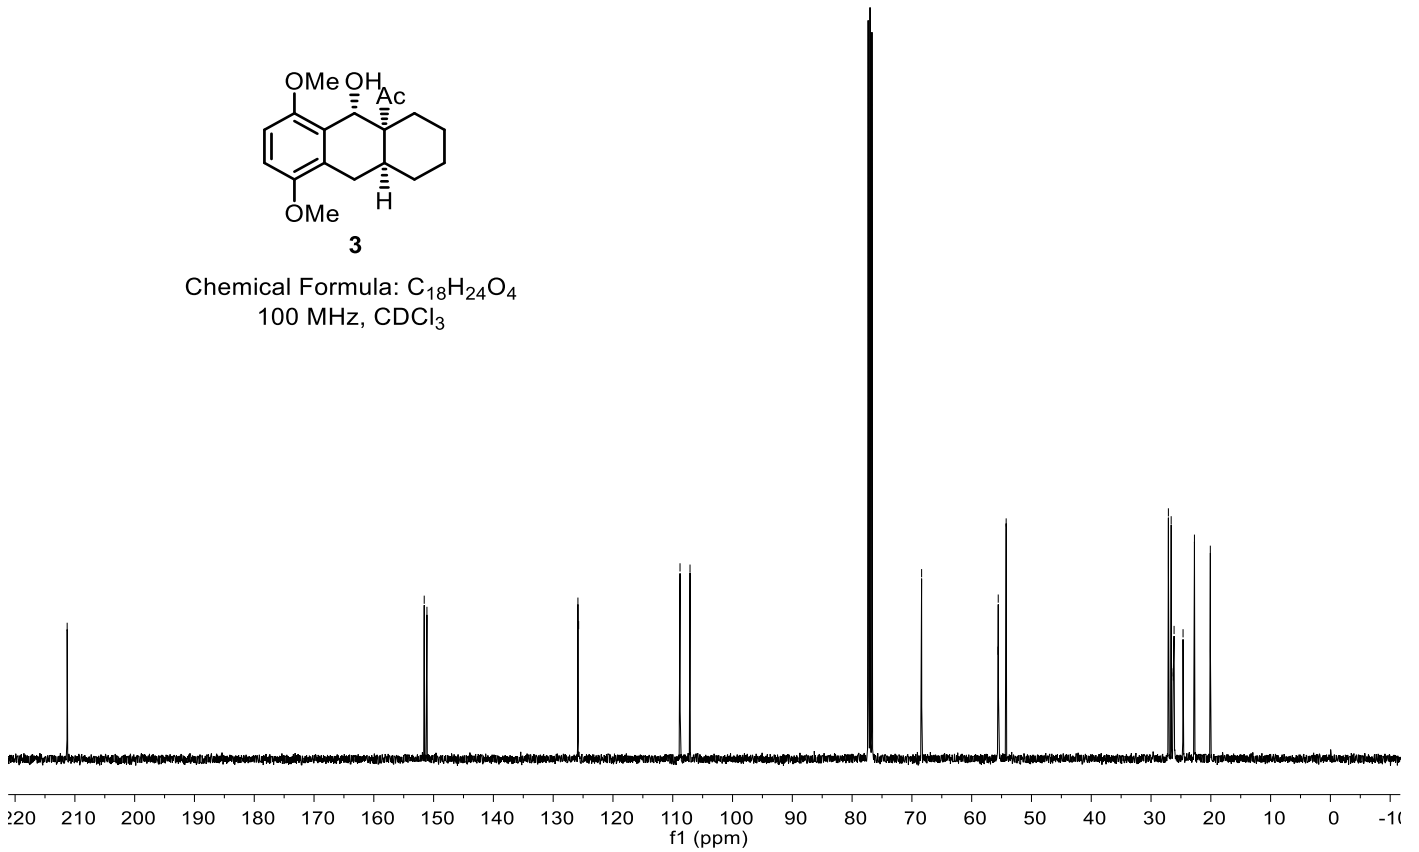

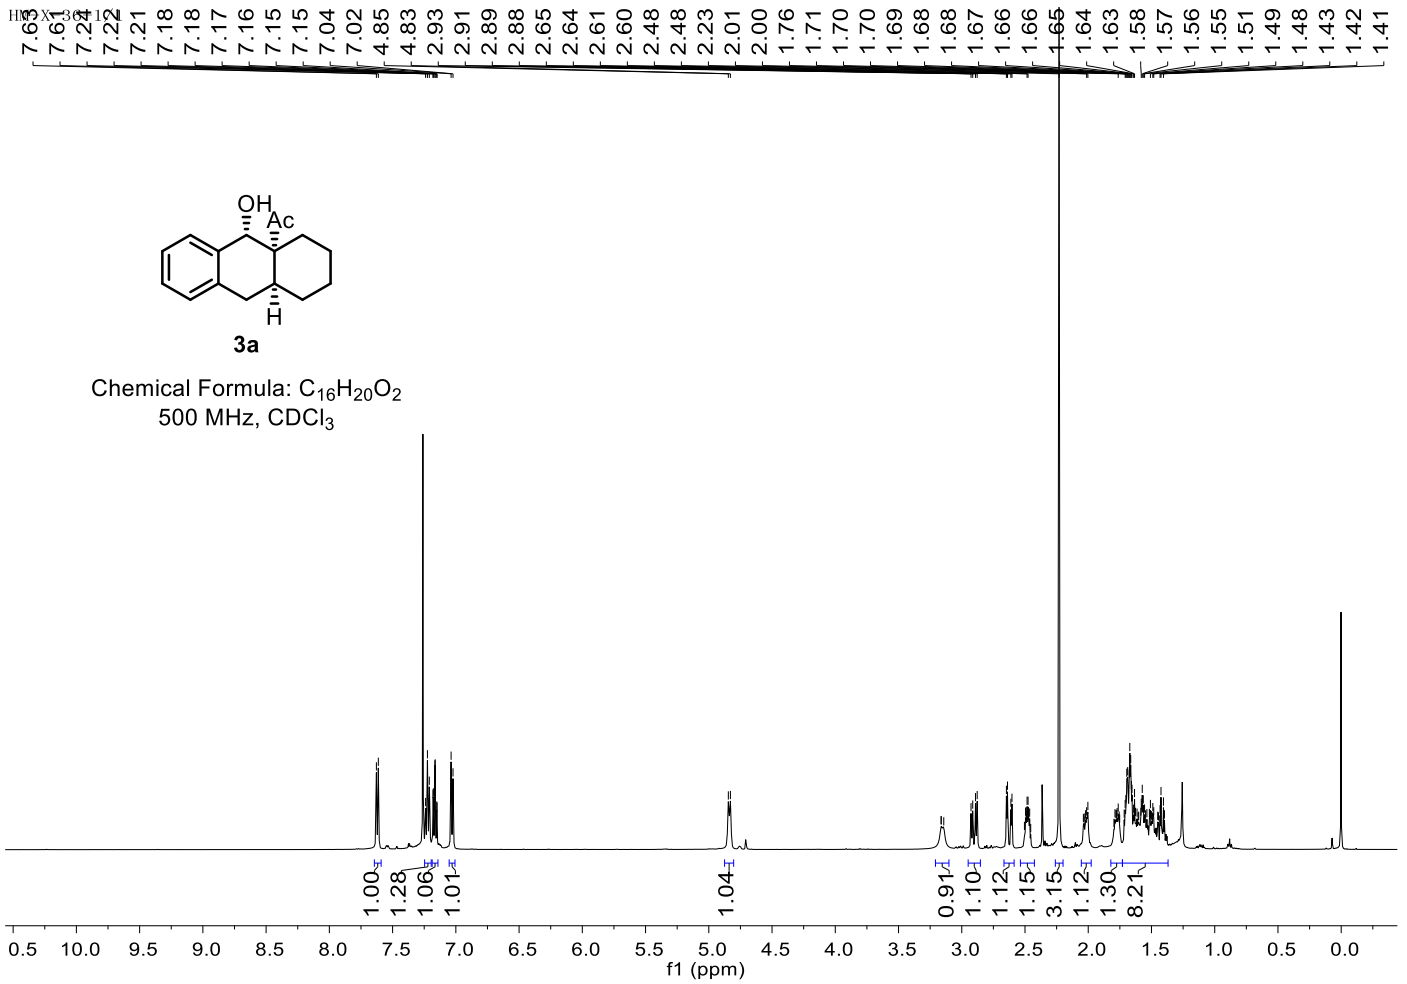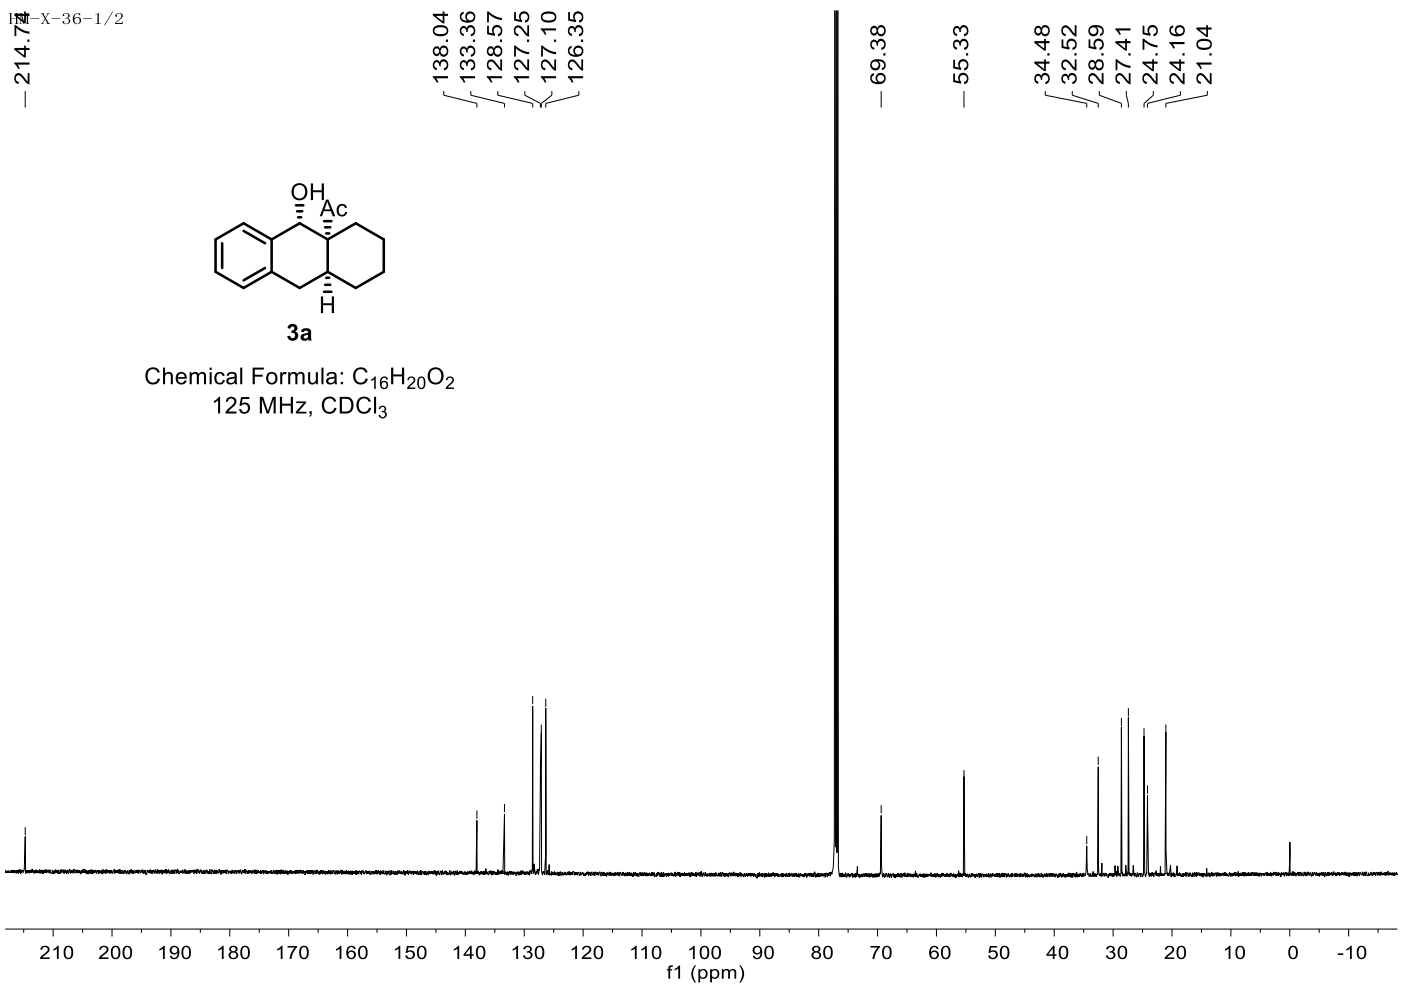

7.2368  
7.1571  
7.1372  
6.7782  
6.7589  
6.7197  
6.6993  
4.9224  
3.8604  
2.9213  
2.9052  
2.8804  
2.7988  
2.7817  
2.7469  
2.7435  
2.7410  
2.7224  
2.3151  
2.1936  
1.9751  
1.9705  
1.9646  
1.9603  
1.8427  
1.8165  
1.8082  
1.7993  
1.5858  
1.5816  
1.5732  
1.5574  
1.5484  
1.5415  
1.5324  
1.5141  
1.5036  
1.4919  
1.4767  
1.4673  
1.4560  
1.4354  
1.4297  
1.4228  
1.3260  
1.2926  
1.2842  
1.2581  
1.2504  
1.1517  
1.1474

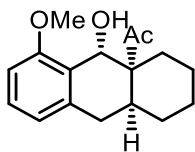

**3b**

Chemical Formula: C<sub>17</sub>H<sub>22</sub>O<sub>3</sub>  
500 MHz, CDCl<sub>3</sub>

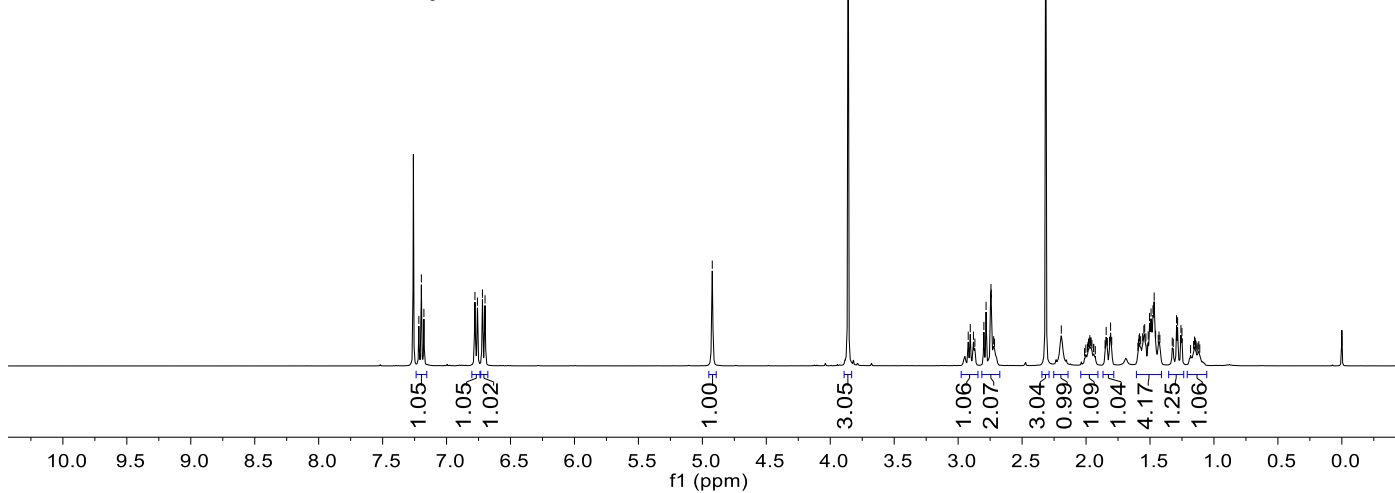

HM-VI  
21.23  
158A-1 C

157.80  
136.91  
128.60  
124.67  
121.21  
107.30  
68.28  
55.37  
54.62  
30.01  
27.12  
26.84  
26.58  
26.33  
22.78  
20.12

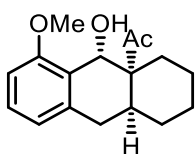

**3b**

Chemical Formula: C<sub>17</sub>H<sub>22</sub>O<sub>3</sub>  
125 MHz, CDCl<sub>3</sub>

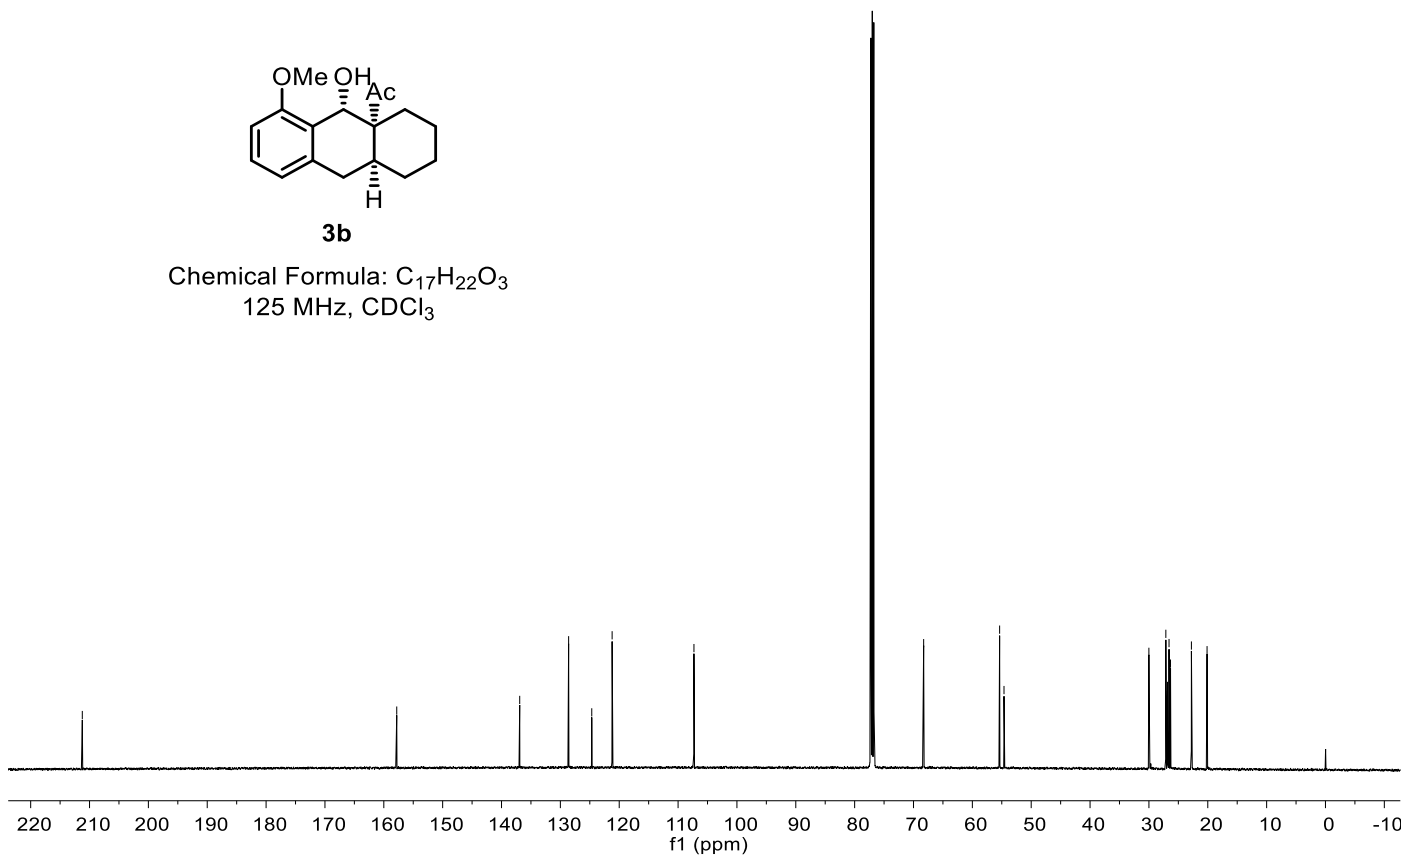

6.33  
6.33  
6.29  
6.29  
4.89  
4.89  
3.86  
3.81  
2.92  
2.90  
2.88  
2.78  
2.77  
2.76  
2.76  
2.75  
2.75  
2.33  
2.02  
2.01  
2.01  
2.00  
1.99  
1.99  
1.85  
1.83  
1.58  
1.57  
1.54  
1.53  
1.52  
1.51  
1.51  
1.50  
1.49  
1.48  
1.48  
1.47  
1.47  
1.45  
1.44  
1.44  
1.33  
1.33  
1.31  
1.30  
1.30  
1.28  
1.28  
1.27  
1.16

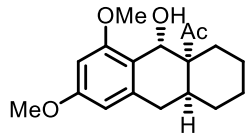

**3c**

Chemical Formula: C<sub>18</sub>H<sub>24</sub>O<sub>4</sub>  
500 MHz, CDCl<sub>3</sub>

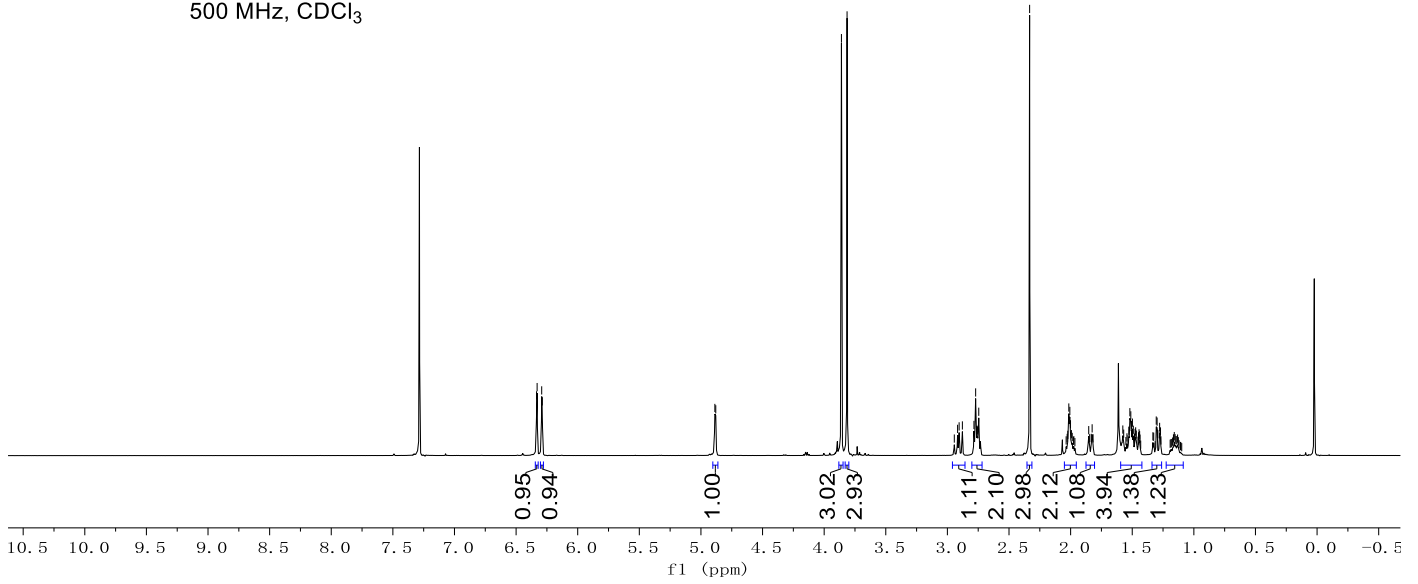

XMM-15147-HC-500/2

211.25  
160.15  
159.00  
137.86  
117.61  
103.69  
96.43  
68.10  
55.40  
55.28  
54.76  
30.54  
27.12  
26.81  
26.55  
26.18  
22.80  
20.12

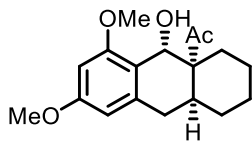

**3c**

Chemical Formula: C<sub>18</sub>H<sub>24</sub>O<sub>4</sub>  
125 MHz, CDCl<sub>3</sub>

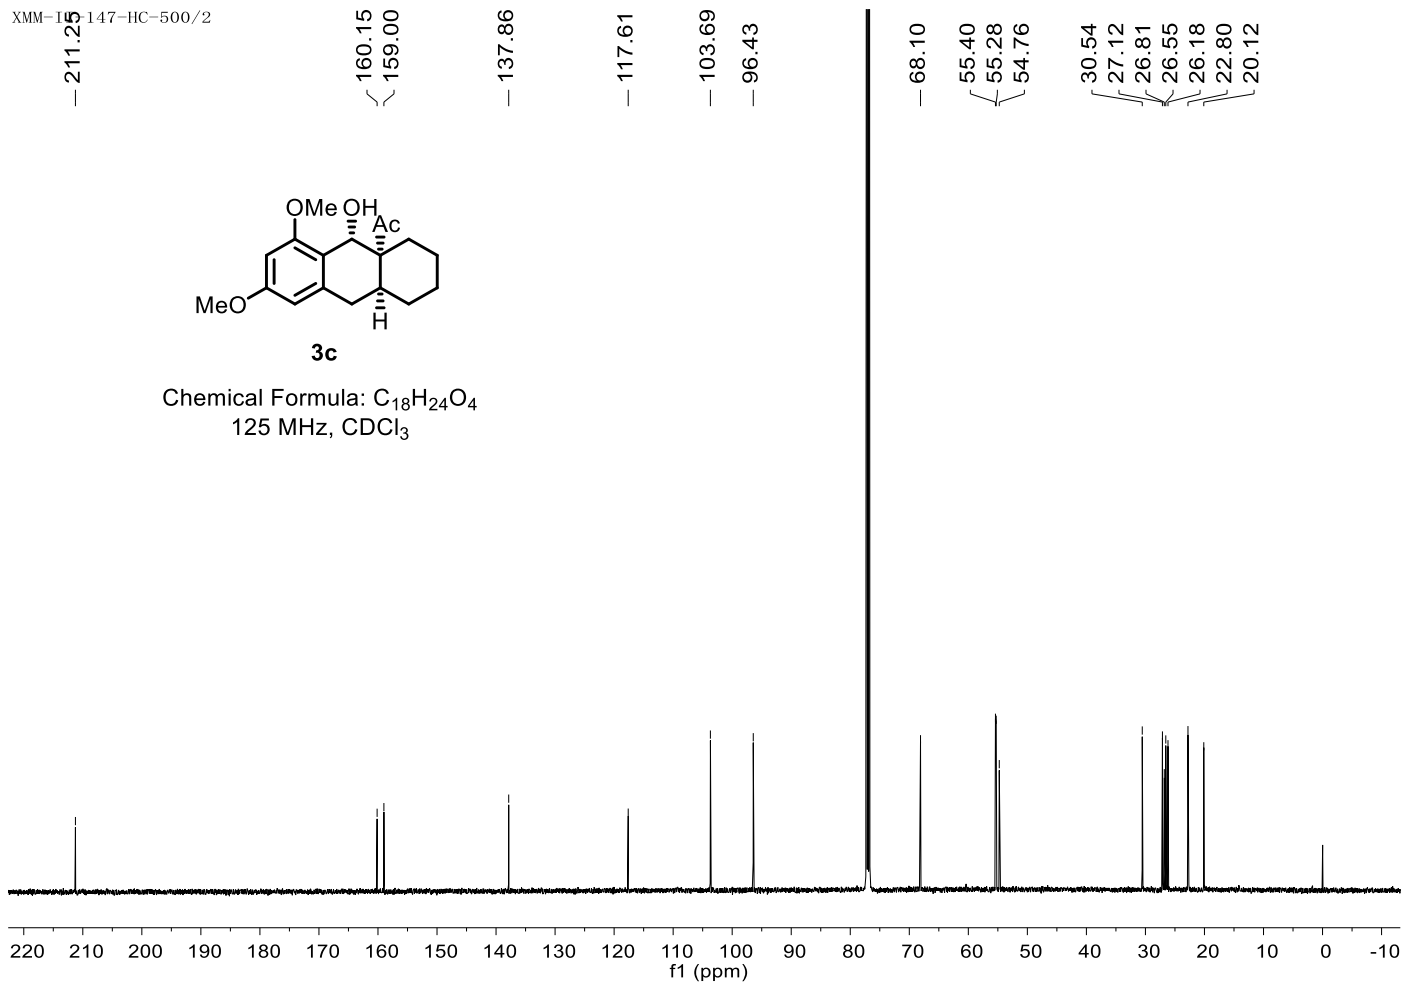

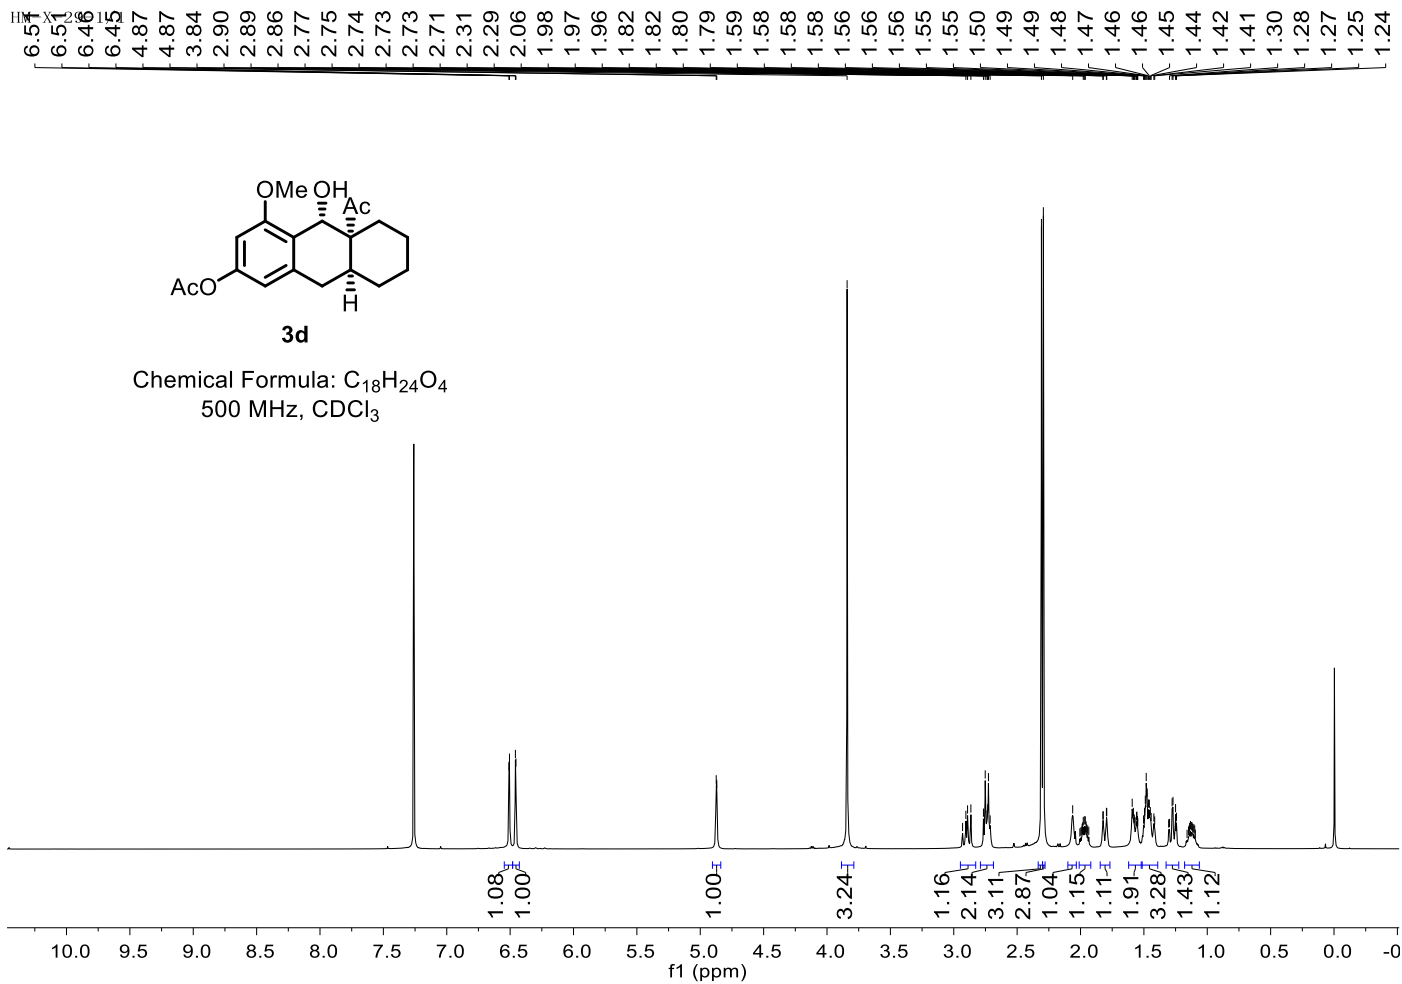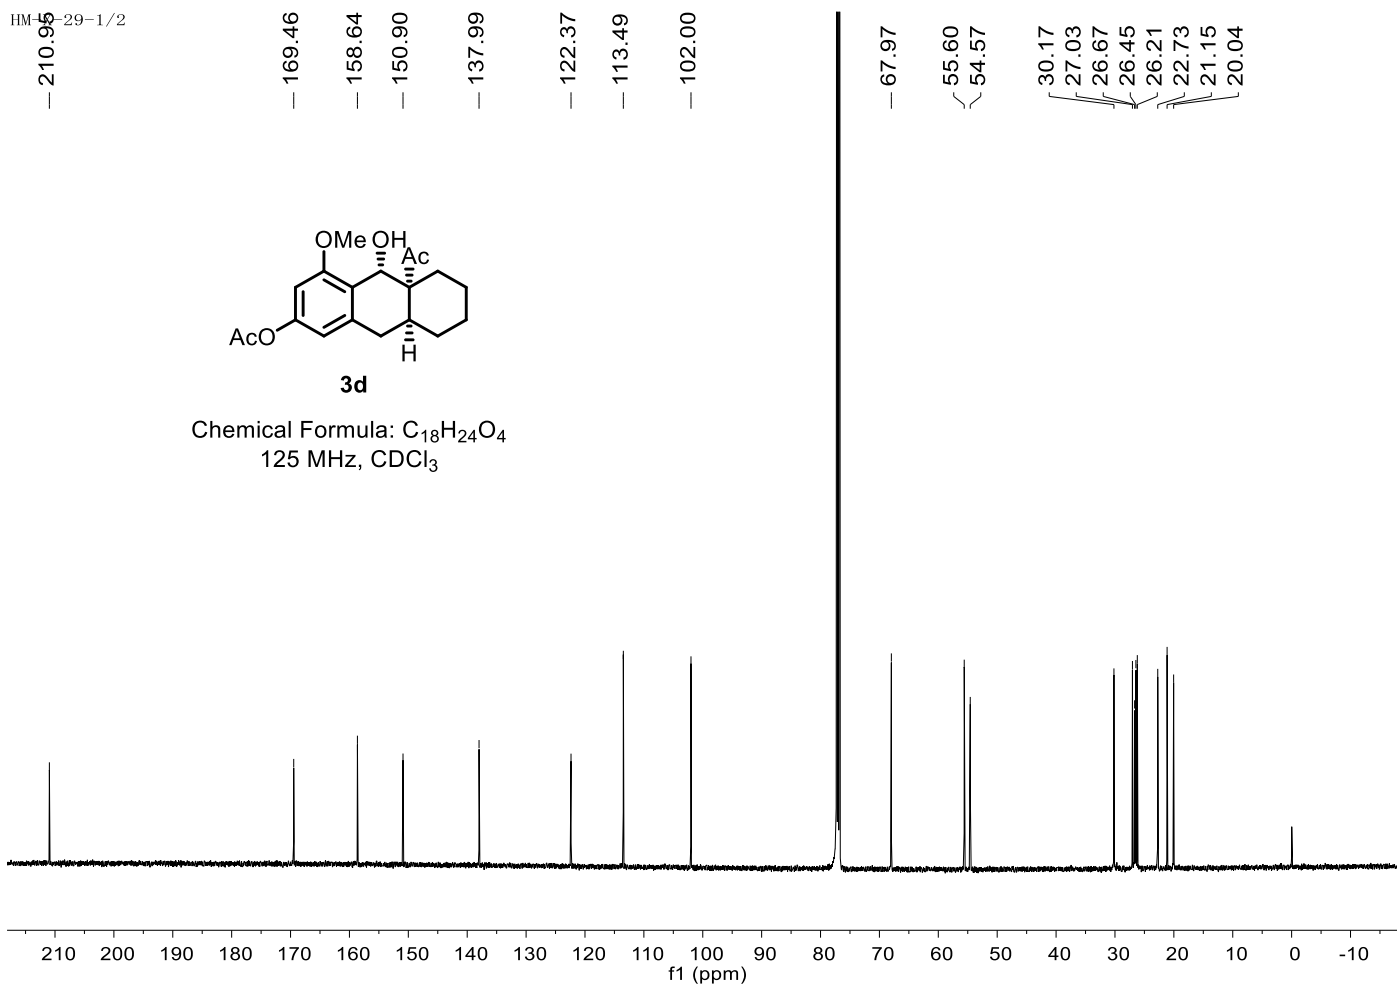

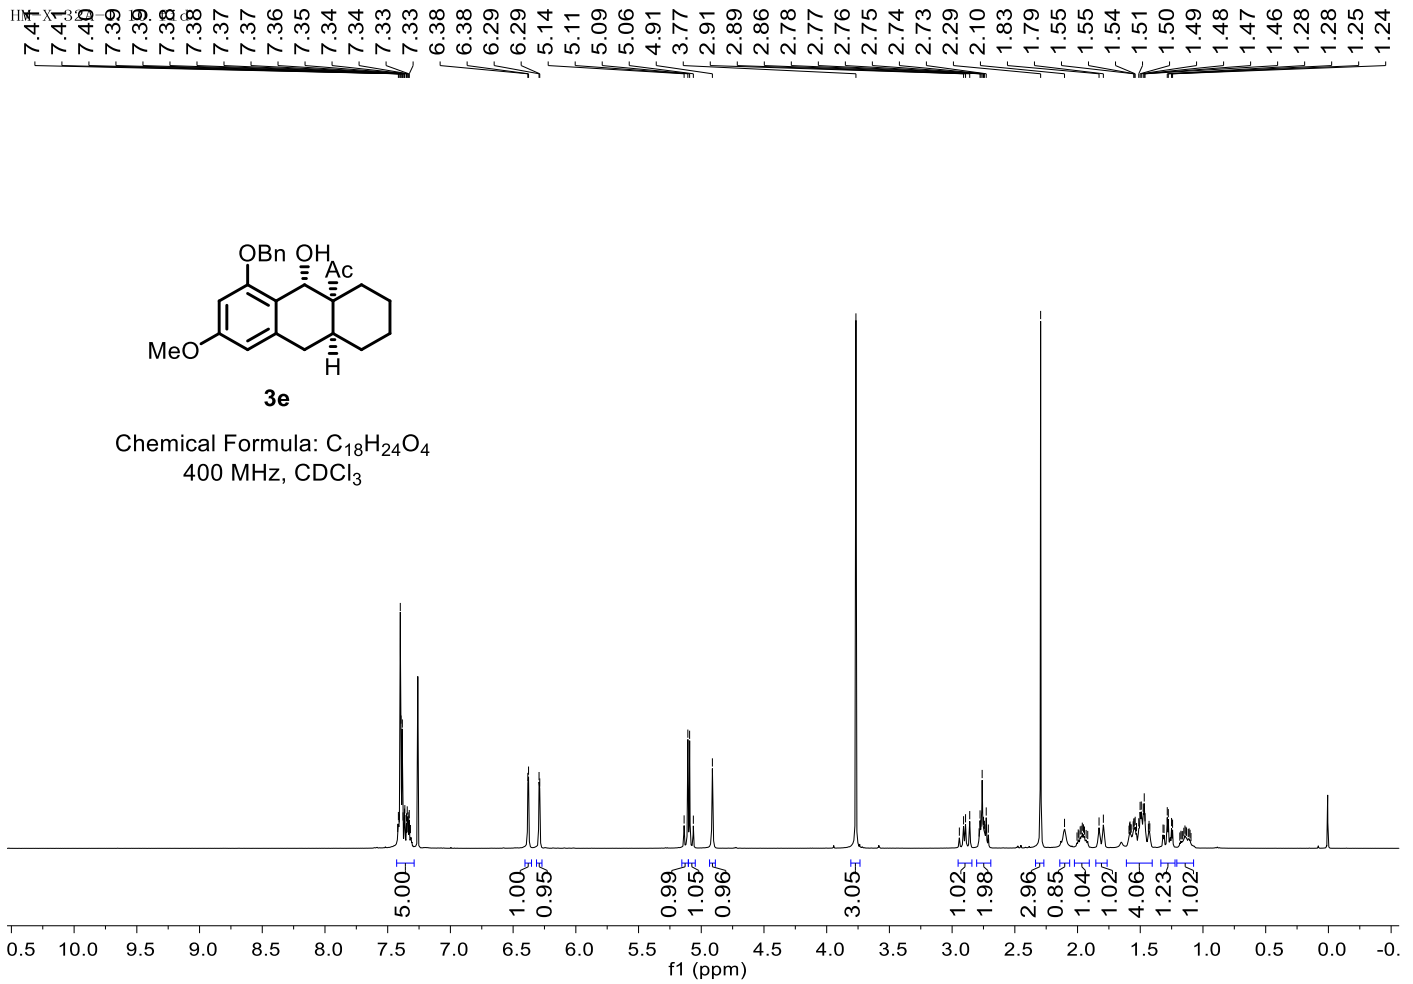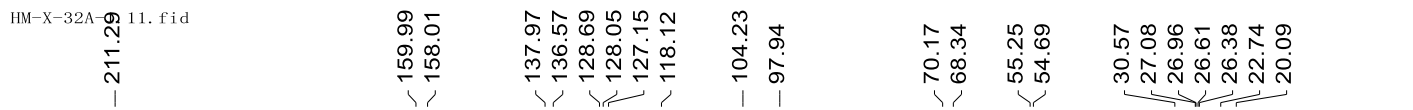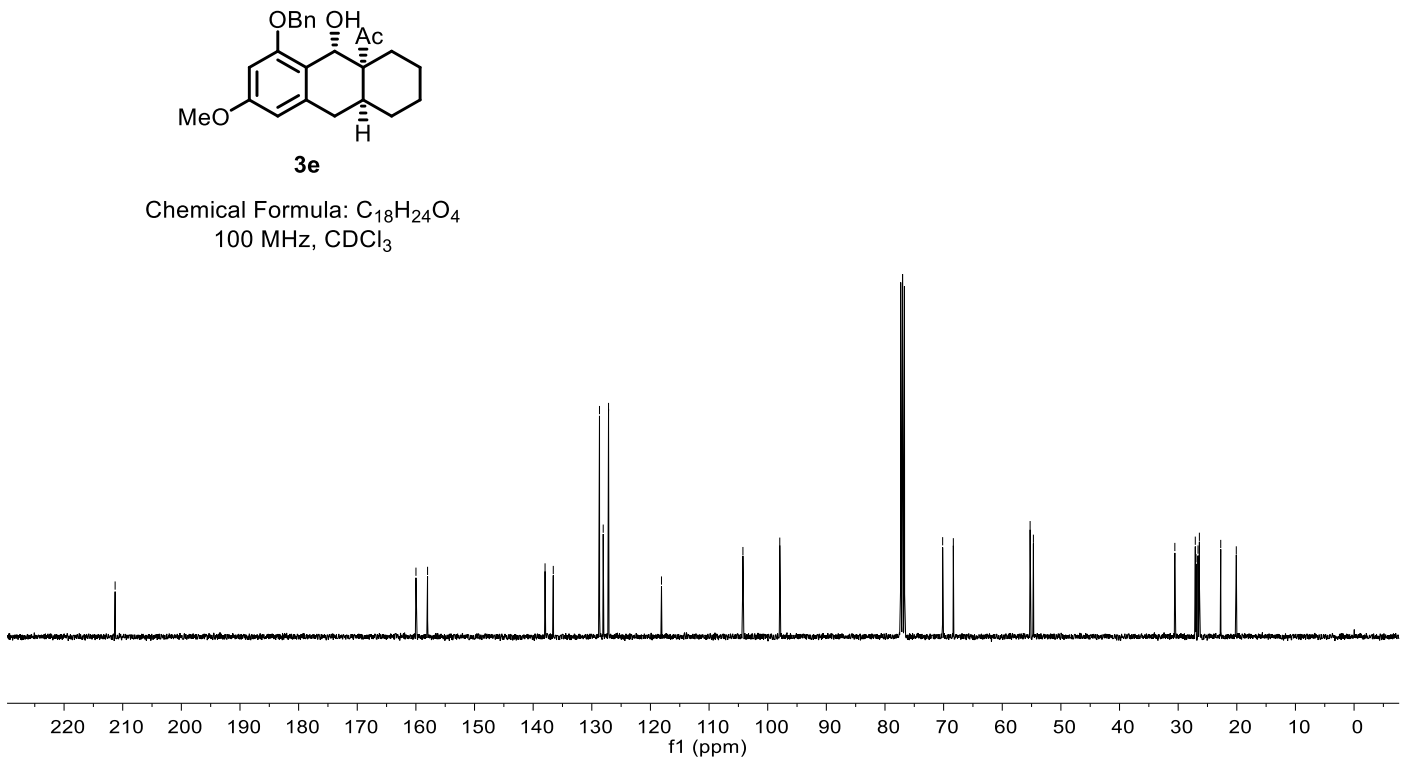

6.73  
6.74  
6.70  
6.69  
4.67  
4.66  
3.80  
3.79  
3.39  
3.38  
2.87  
2.85  
2.84  
2.83  
2.82  
2.80  
2.79  
2.75  
2.50  
2.50  
2.50  
2.49  
2.48  
2.46  
2.46  
2.45  
2.40  
2.40  
2.39  
2.38  
2.38  
2.37  
2.36  
2.35  
1.93  
1.89  
1.88  
1.87  
1.87  
1.86  
1.30  
1.29  
1.29  
1.28  
1.27  
1.27  
1.26  
1.25  
1.09  
1.04

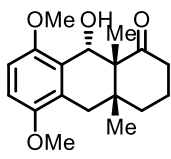

11

Chemical Formula: C<sub>18</sub>H<sub>24</sub>O<sub>4</sub>

500 MHz, CDCl<sub>3</sub>

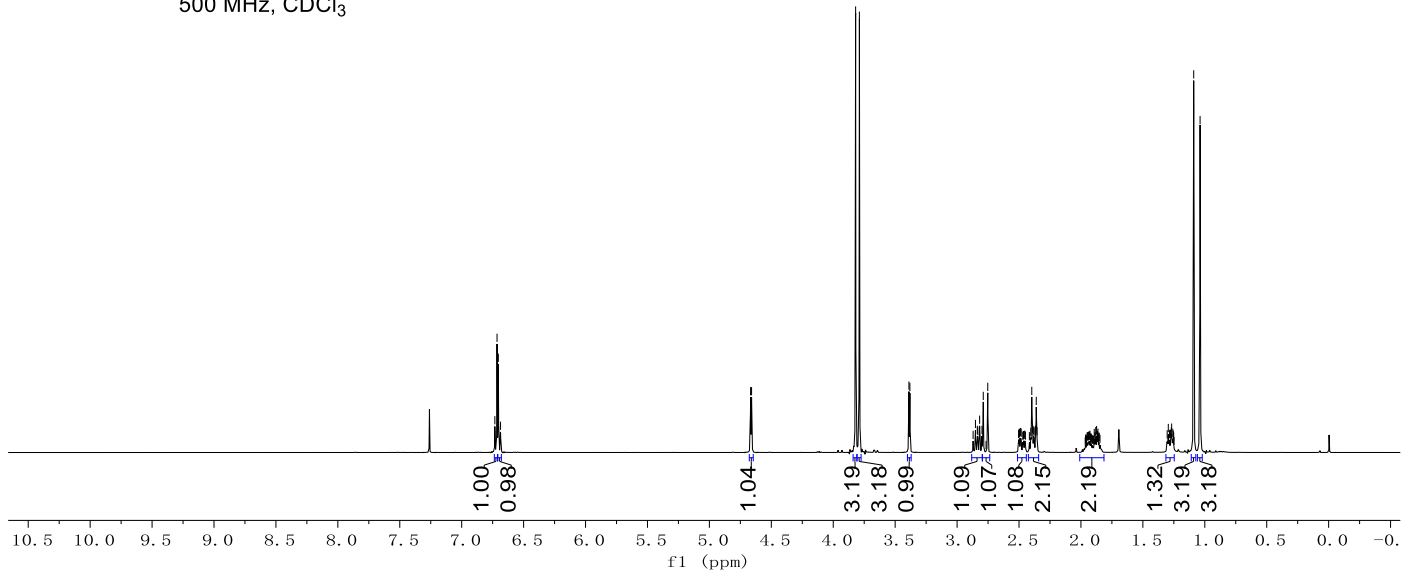

216:04 M-I-143-04-HC-500/2

151.70  
151.06

125.98  
124.28

108.61  
107.33

71.18

55.57  
55.53  
53.77

39.42  
35.98  
34.92

32.42  
24.81  
19.82  
16.94

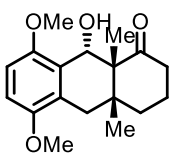

11

Chemical Formula: C<sub>18</sub>H<sub>24</sub>O<sub>4</sub>

125 MHz, CDCl<sub>3</sub>

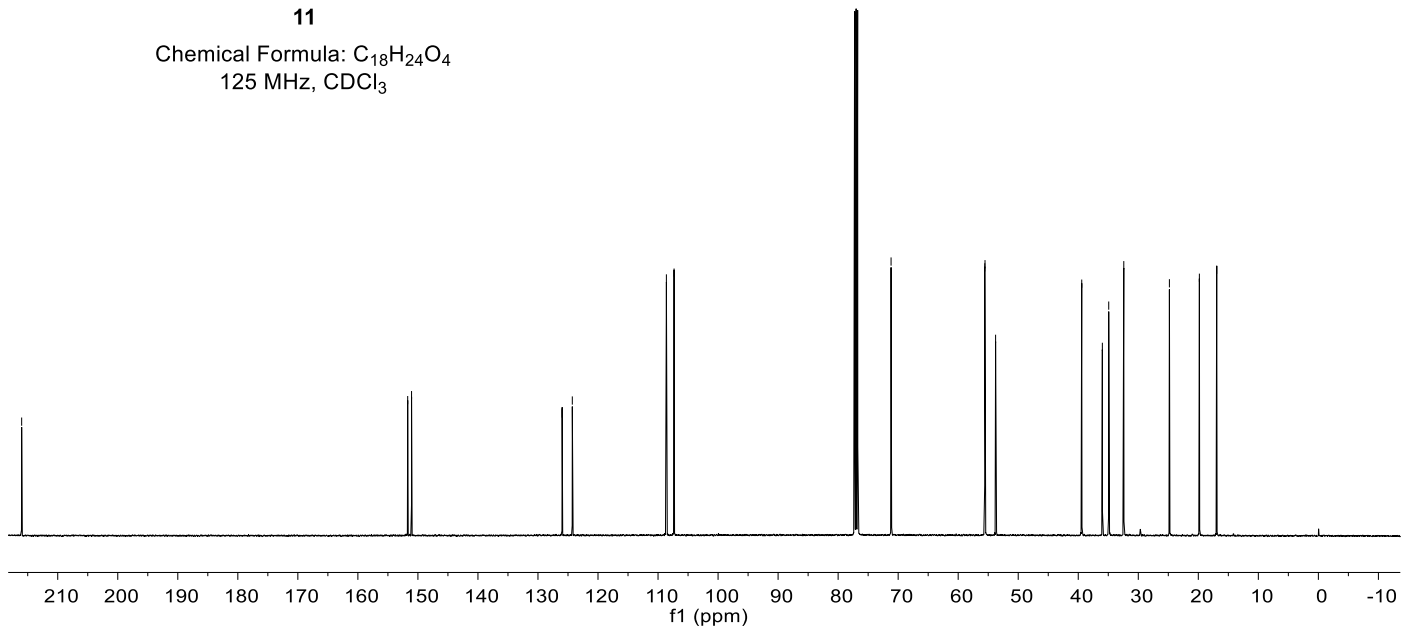

6.73  
6.71  
6.70  
6.68  
4.66  
4.65  
3.81  
3.79  
3.31  
3.30  
2.92  
2.91  
2.90  
2.89  
2.88  
2.50  
2.46  
2.36  
2.31  
2.28  
1.82  
1.81  
1.80  
1.80  
1.79  
1.79  
1.78  
1.78  
1.77  
1.43  
1.42  
1.41  
1.41  
1.40  
1.39  
1.39  
1.38  
1.37  
1.37  
1.36  
1.34  
1.32  
1.31  
1.30  
1.30  
1.29  
1.28  
1.04  
0.94  
0.93

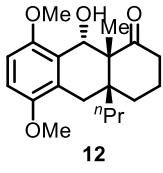

Chemical Formula: C<sub>20</sub>H<sub>28</sub>O<sub>4</sub>  
500 MHz, CDCl<sub>3</sub>

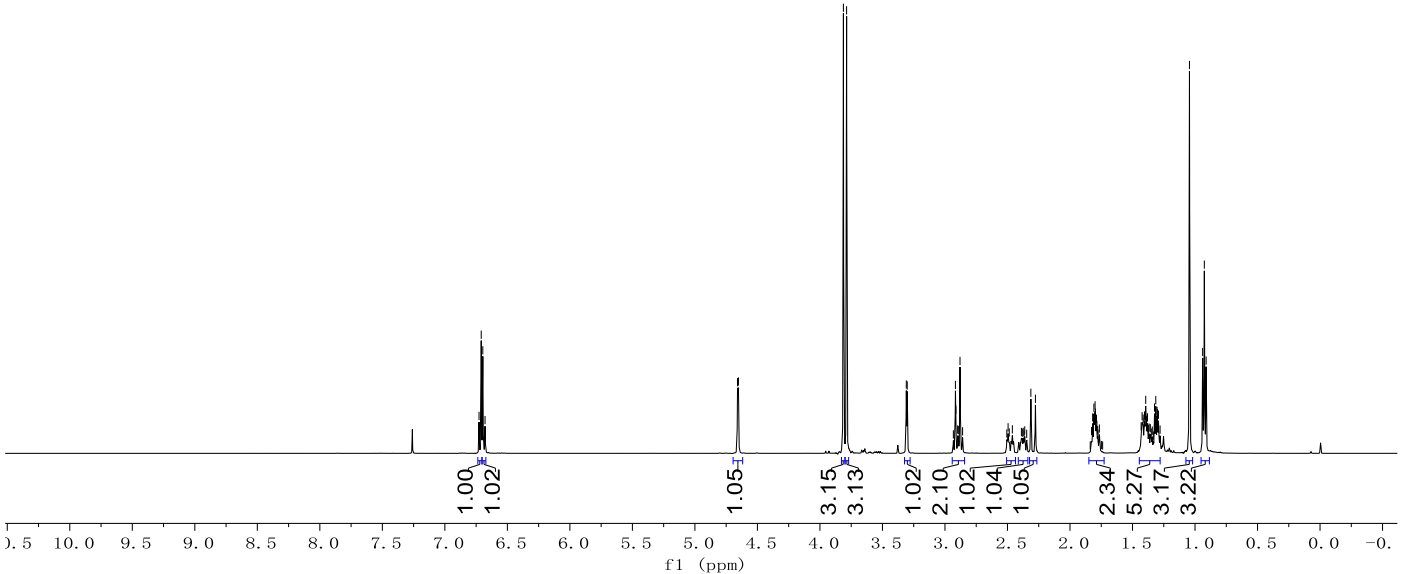

XMM-I 16-01-500-HC/2  
C

216.18  
151.60  
151.18  
125.97  
124.13  
108.52  
107.14  
71.42  
55.52  
55.47  
54.50  
39.81  
38.69  
38.04  
32.00  
26.97  
19.39  
16.41  
15.87  
14.95

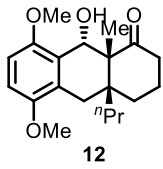

Chemical Formula: C<sub>20</sub>H<sub>28</sub>O<sub>4</sub>  
125 MHz, CDCl<sub>3</sub>

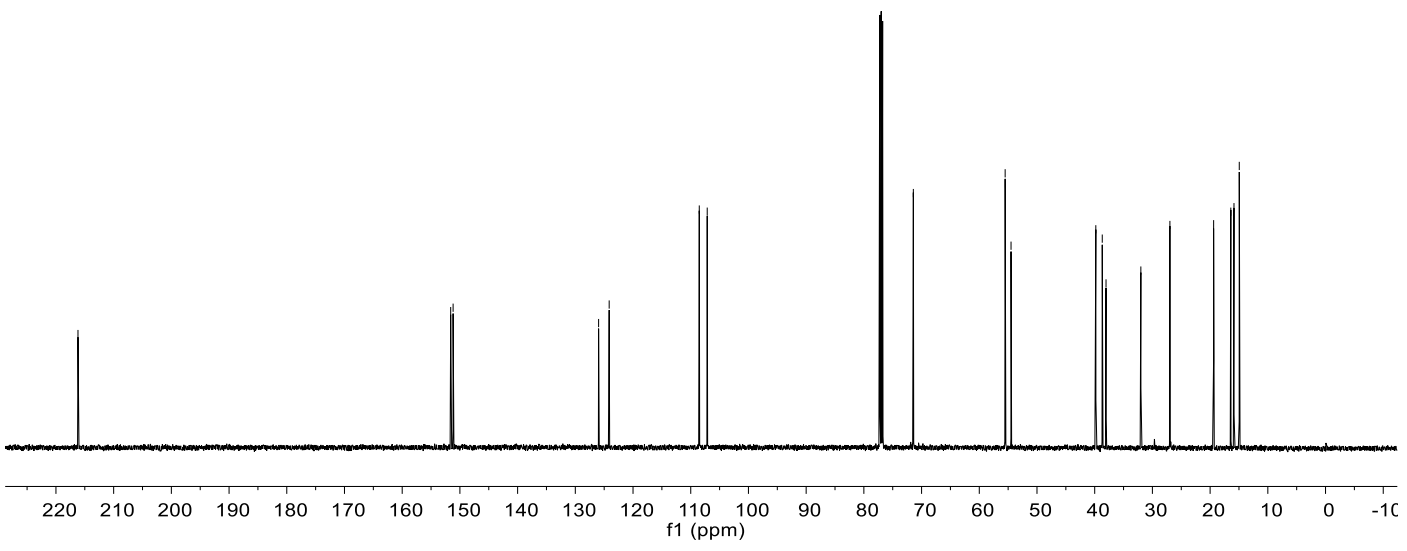



6.73  
6.71  
6.70  
6.68  
4.66  
4.65  
3.87  
3.79  
3.30  
3.29  
2.92  
2.90  
2.88  
2.86  
2.49  
2.46  
2.39  
2.38  
2.37  
2.30  
2.27  
1.83  
1.82  
1.81  
1.80  
1.80  
1.79  
1.79  
1.78  
1.78  
1.42  
1.40  
1.40  
1.39  
1.37  
1.37  
1.33  
1.31  
1.31  
1.31  
1.29  
1.29  
1.28  
1.28  
1.27  
1.26  
1.25  
1.04  
0.90  
0.89  
0.87

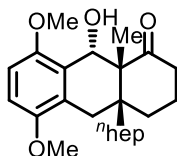

13

Chemical Formula: C<sub>24</sub>H<sub>36</sub>O<sub>4</sub>  
500 MHz, CDCl<sub>3</sub>

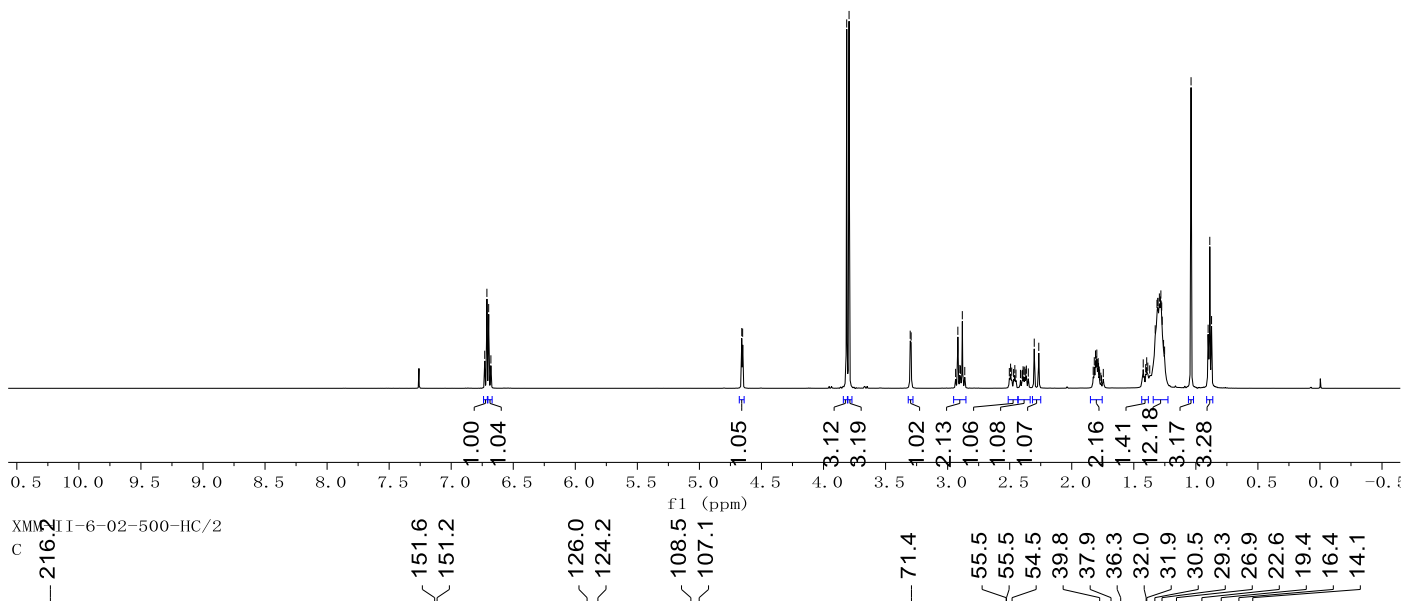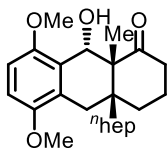

13

Chemical Formula: C<sub>24</sub>H<sub>36</sub>O<sub>4</sub>  
125 MHz, CDCl<sub>3</sub>

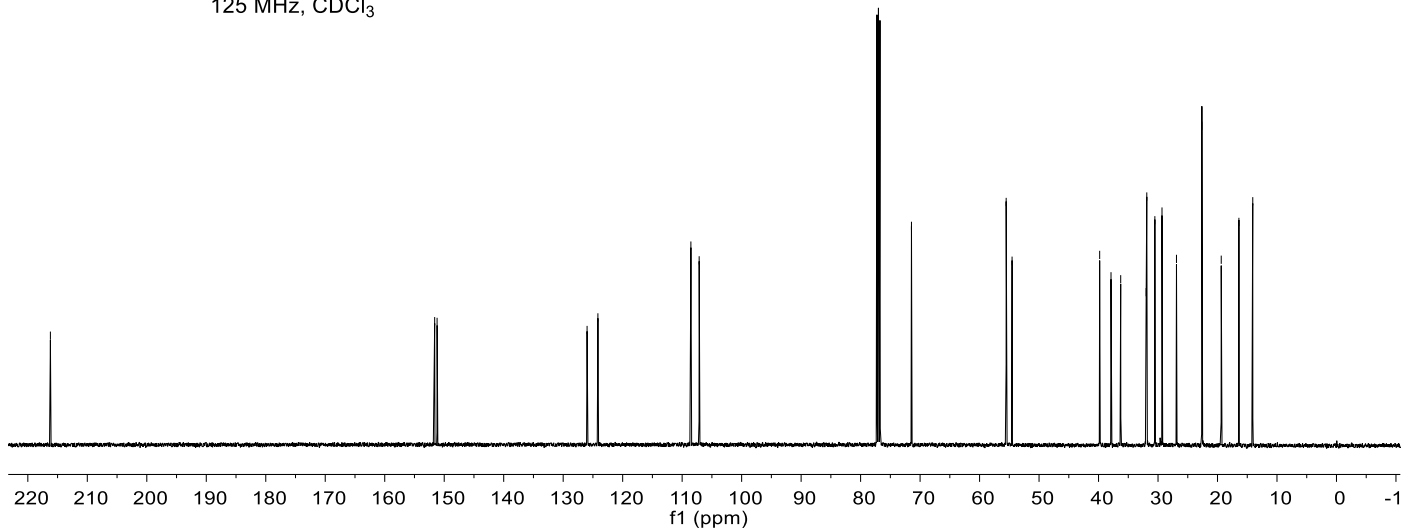

7.25  
7.24  
7.24  
7.23  
7.22  
7.22  
7.21  
7.21  
7.03  
7.03  
7.02  
7.01  
7.01  
6.74  
4.81  
4.79  
3.95  
3.94  
3.86  
3.75  
2.71  
2.70  
2.68  
2.67  
2.66  
2.63  
2.61  
2.60  
2.59  
2.58  
2.51  
2.10  
2.08  
2.07  
1.90  
1.90  
1.89  
1.87  
1.87  
1.82  
1.81  
1.80  
1.67  
1.67  
1.66  
1.65  
1.64  
1.62  
1.46

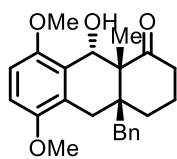

**14**

Chemical Formula: C<sub>24</sub>H<sub>28</sub>O<sub>4</sub>  
500 MHz, CDCl<sub>3</sub>

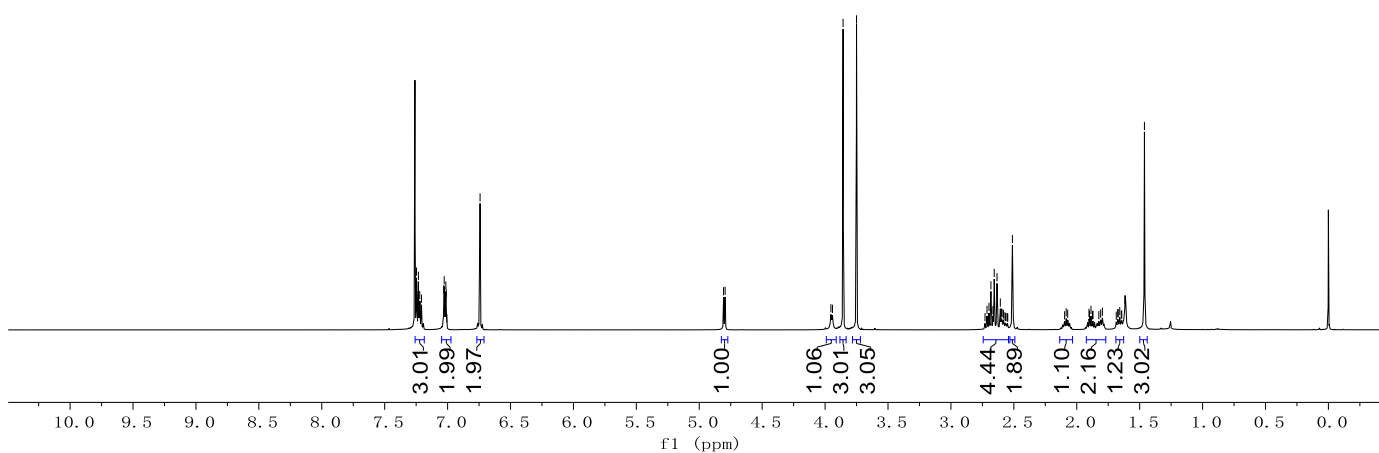

XMM-95/2

216.65  
151.97  
150.97  
137.37  
130.73  
127.82  
126.46  
126.20  
124.26  
108.89  
108.25  
72.34  
55.83  
55.64  
54.74  
42.40  
39.61  
38.37  
29.15  
27.62  
20.65  
17.61

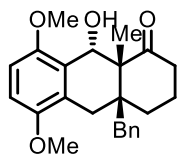

**14**

Chemical Formula: C<sub>24</sub>H<sub>28</sub>O<sub>4</sub>  
125 MHz, CDCl<sub>3</sub>

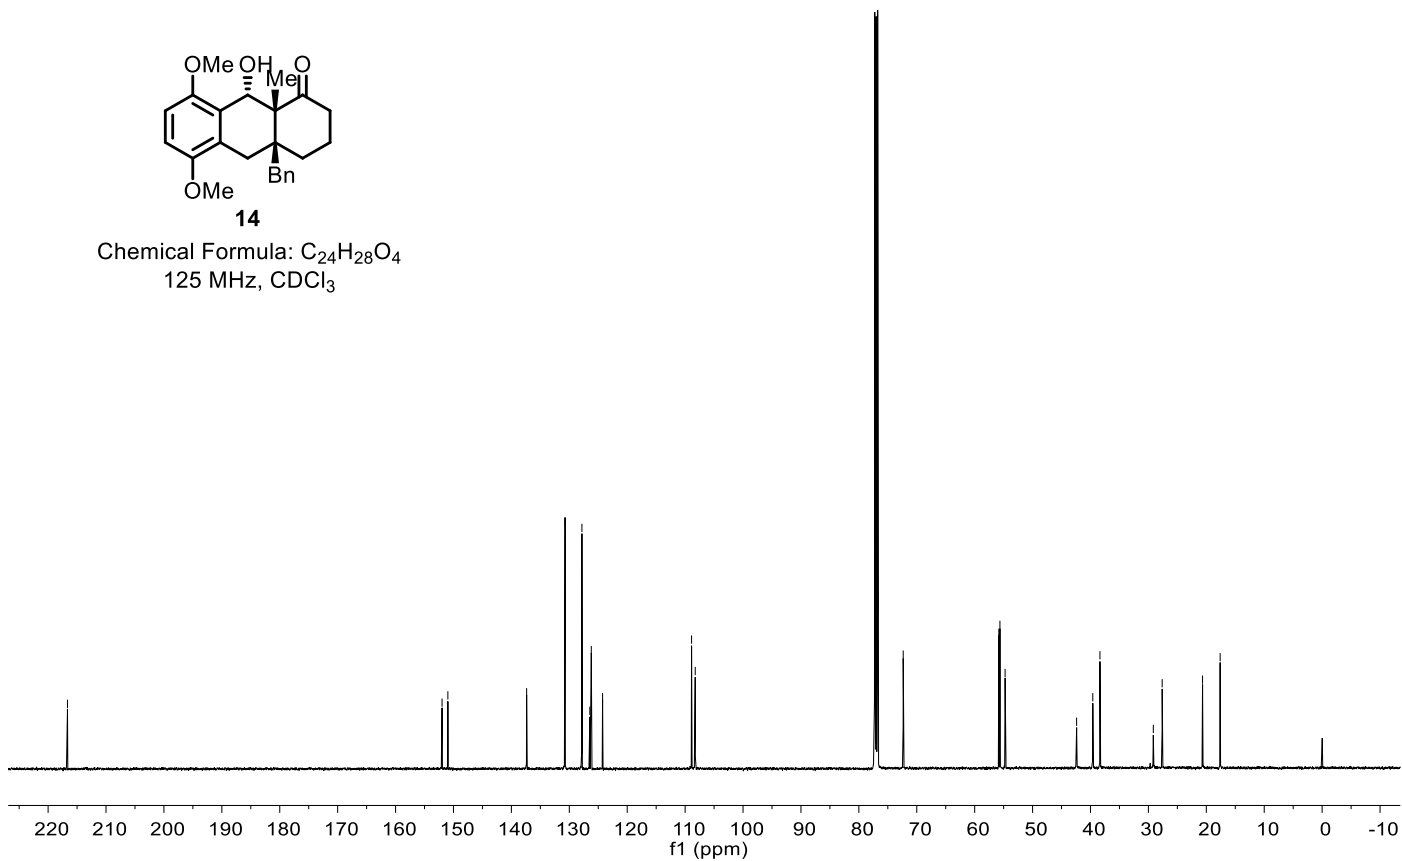

7.14  
7.13  
7.11  
6.74  
6.72  
6.64  
6.62  
5.39  
5.38  
3.88  
3.87  
3.87  
2.89  
2.89  
2.89  
2.88  
2.86  
2.82  
2.62  
2.59  
2.32  
2.30  
2.30  
2.29  
2.28  
2.27  
2.25  
2.24  
2.21  
2.19  
2.19  
2.16  
2.16  
2.01  
2.00  
2.00  
1.99  
1.98  
1.98  
1.97  
1.92  
1.91  
1.36  
1.33  
1.14  
1.13  
1.00  
0.99  
0.97

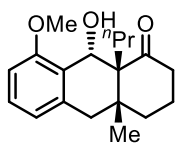

15

ChemicalFormula: C<sub>19</sub>H<sub>26</sub>O<sub>3</sub>  
500 MHz, CDCl<sub>3</sub>

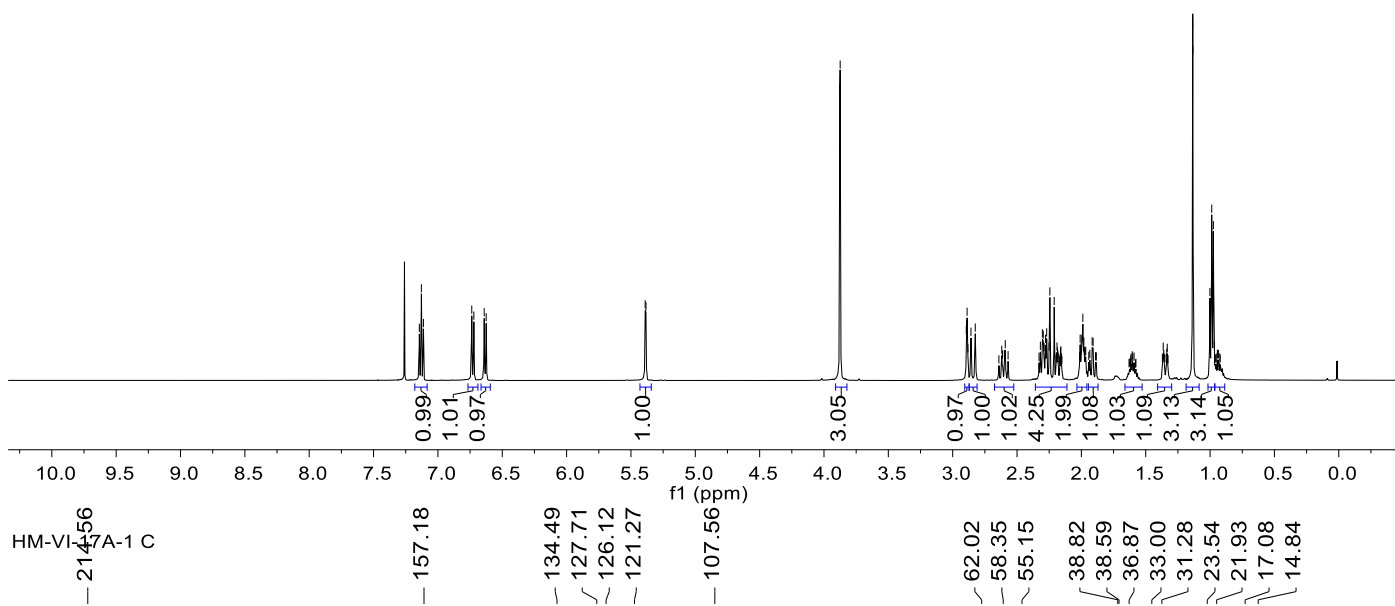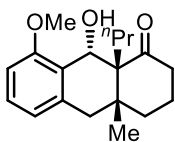

15

ChemicalFormula: C<sub>19</sub>H<sub>26</sub>O<sub>3</sub>  
125 MHz, CDCl<sub>3</sub>

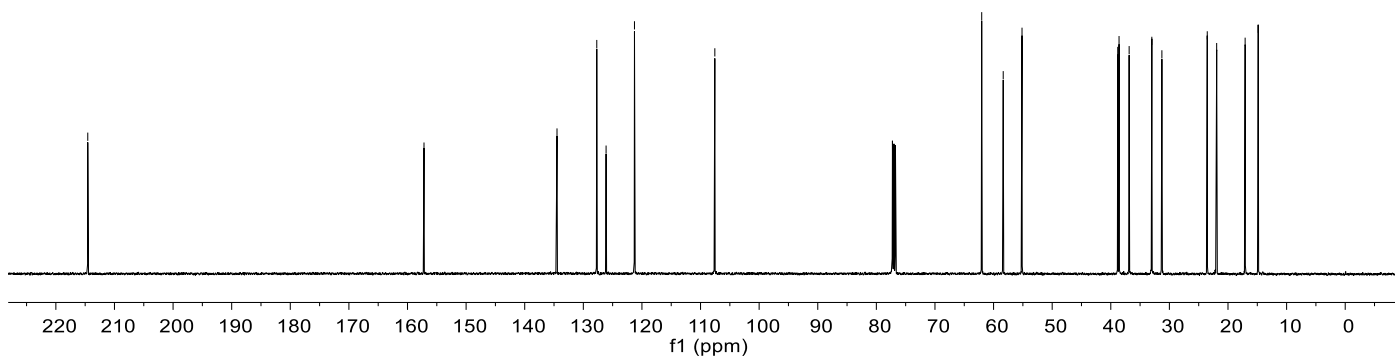

6.33  
6.33  
6.14  
6.14  
6.13  
5.30  
3.86  
3.75  
2.84  
2.80  
2.70  
2.61  
2.60  
2.58  
2.57  
2.55  
2.30  
2.29  
2.28  
2.27  
2.26  
2.26  
2.25  
2.23  
2.20  
2.18  
2.17  
2.16  
2.15  
2.14  
2.02  
2.01  
2.00  
1.99  
1.98  
1.97  
1.96  
1.93  
1.92  
1.89  
1.88  
1.85  
1.58  
1.56  
1.35  
1.34  
1.31  
1.31  
1.13  
0.99  
0.97  
0.95

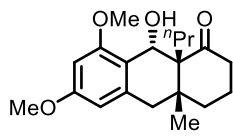

16

Chemical Formula: C<sub>20</sub>H<sub>28</sub>O<sub>4</sub>  
400 MHz, CDCl<sub>3</sub>

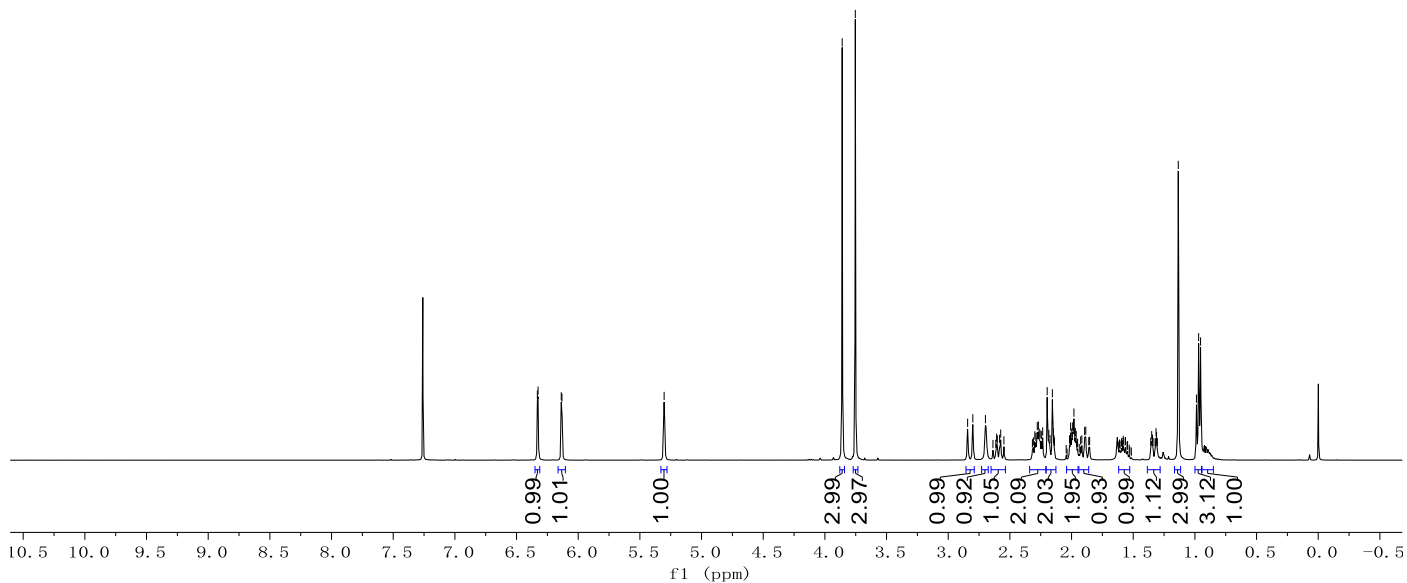

XMM-T 134-C/8

214.64  
159.55  
158.46  
135.37  
119.11  
104.23  
96.60  
61.98  
58.46  
55.34  
55.22  
39.25  
39.10  
37.02  
33.15  
31.44  
23.77  
22.05  
17.16  
14.94

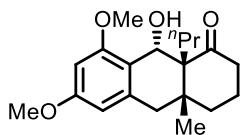

16

Chemical Formula: C<sub>20</sub>H<sub>28</sub>O<sub>4</sub>  
125 MHz, CDCl<sub>3</sub>

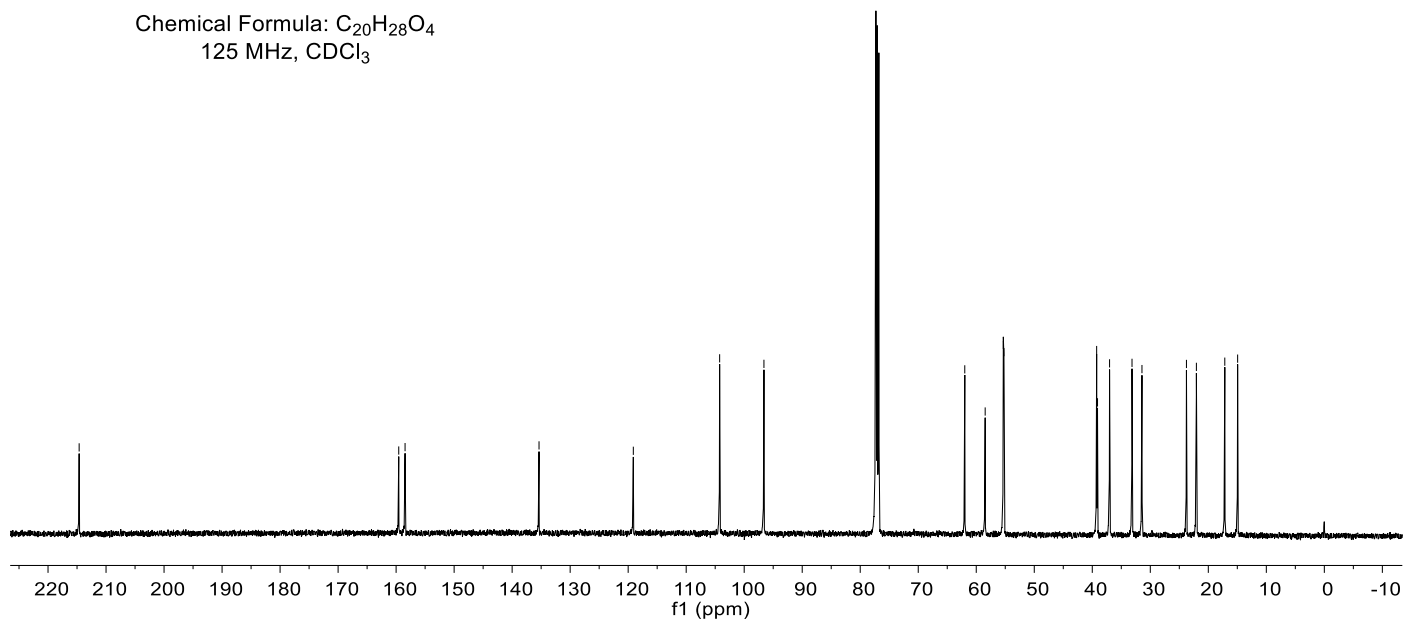

6.73  
6.70  
6.70  
6.67  
4.95  
4.93  
4.26  
4.24  
3.84  
3.76  
2.71  
2.66  
2.57  
2.54  
2.52  
2.51  
2.49  
2.49  
2.48  
2.42  
2.38  
2.06  
2.06  
2.05  
2.05  
2.03  
2.03  
2.02  
2.01  
2.00  
2.00  
1.99  
1.98  
1.91  
1.90  
1.88  
1.87  
1.86  
1.86  
1.85  
1.84  
1.84  
1.81  
1.79  
1.76  
1.56  
1.56  
0.94  
0.92  
0.90  
0.88

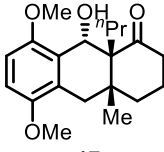

17

Chemical Formula: C<sub>20</sub>H<sub>28</sub>O<sub>4</sub>  
400 MHz, CDCl<sub>3</sub>

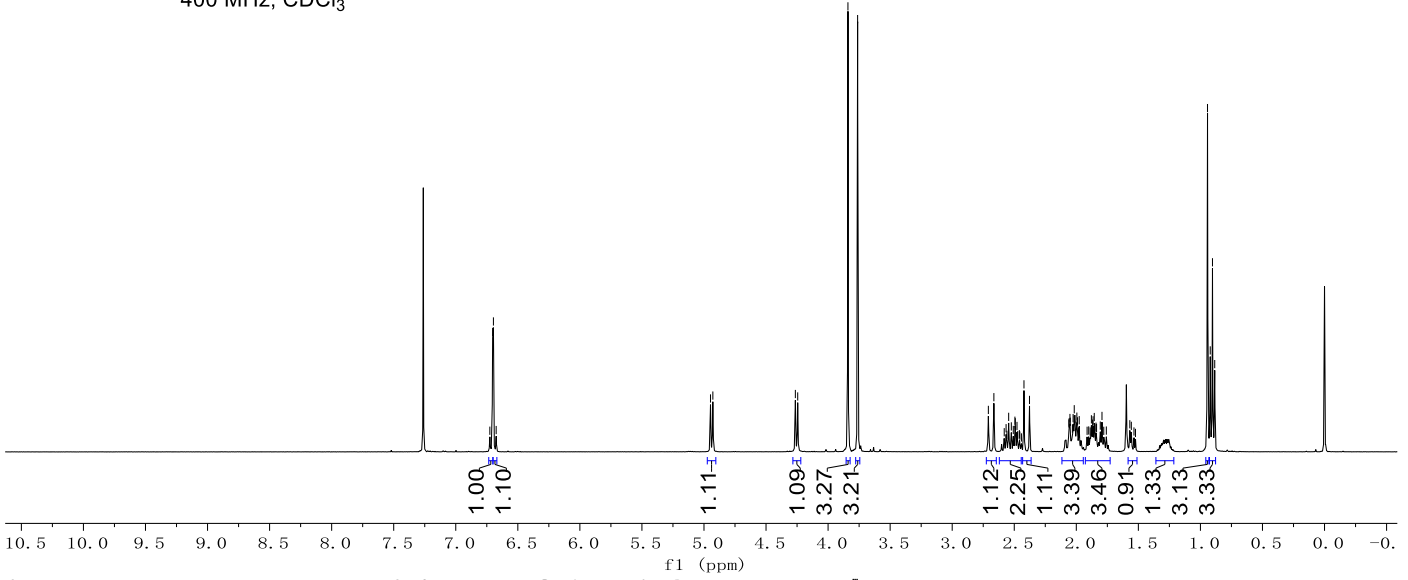

MM-II-96 400.12.fid

152.03  
150.78  
127.69  
124.64  
108.67  
108.40  
71.28  
57.15  
56.03  
55.60  
40.77  
39.44  
36.99  
33.87  
33.50  
22.94  
21.78  
19.24  
15.43

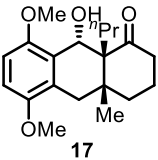

17

Chemical Formula: C<sub>20</sub>H<sub>28</sub>O<sub>4</sub>  
100 MHz, CDCl<sub>3</sub>

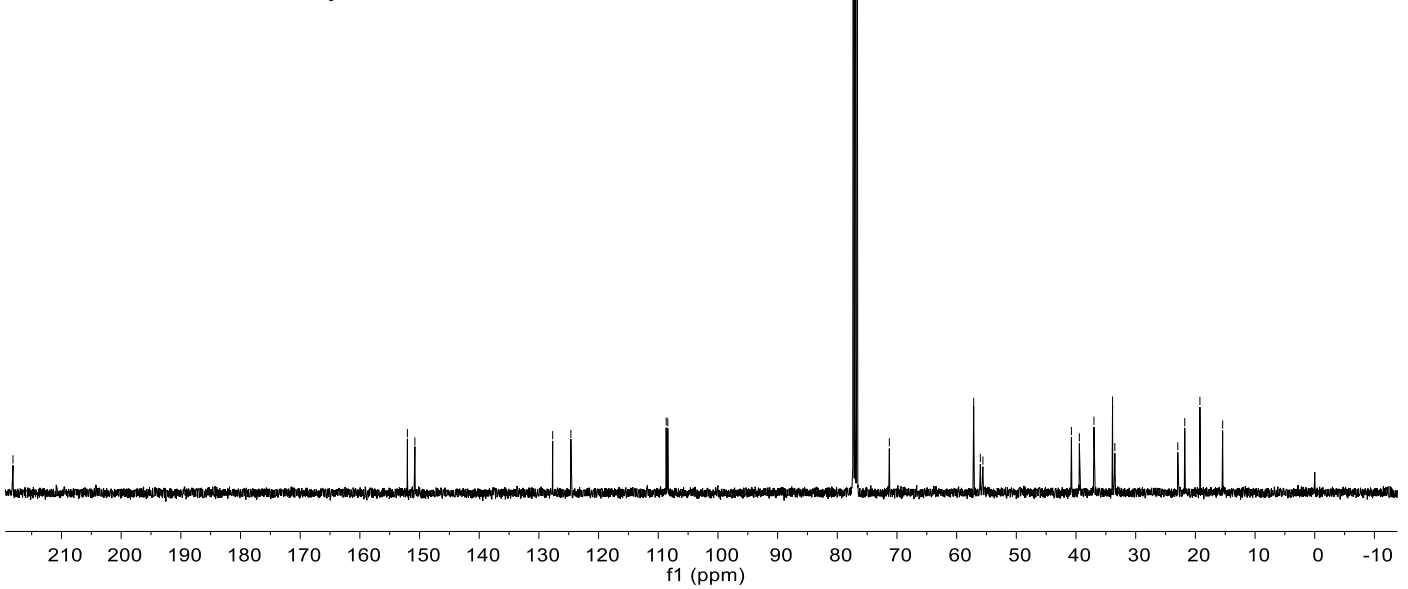

7.09  
7.09  
7.08  
7.08  
7.07  
7.07  
7.06  
7.06  
7.05  
7.05  
7.04  
7.04  
6.77  
6.74  
6.70  
6.67  
4.69  
4.68  
3.82  
3.65  
3.33  
3.29  
3.05  
3.04  
3.03  
3.01  
2.99  
2.98  
2.82  
2.77  
2.67  
2.62  
2.60  
2.59  
2.51  
2.50  
2.49  
2.48  
2.47  
2.46  
1.91  
1.90  
1.89  
1.88  
1.31  
1.31  
1.28  
1.28  
1.27  
1.26  
1.26  
1.09

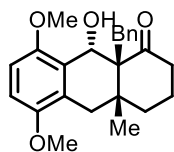

18

Chemical Formula: C<sub>24</sub>H<sub>28</sub>O<sub>4</sub>  
400 MHz, CDCl<sub>3</sub>

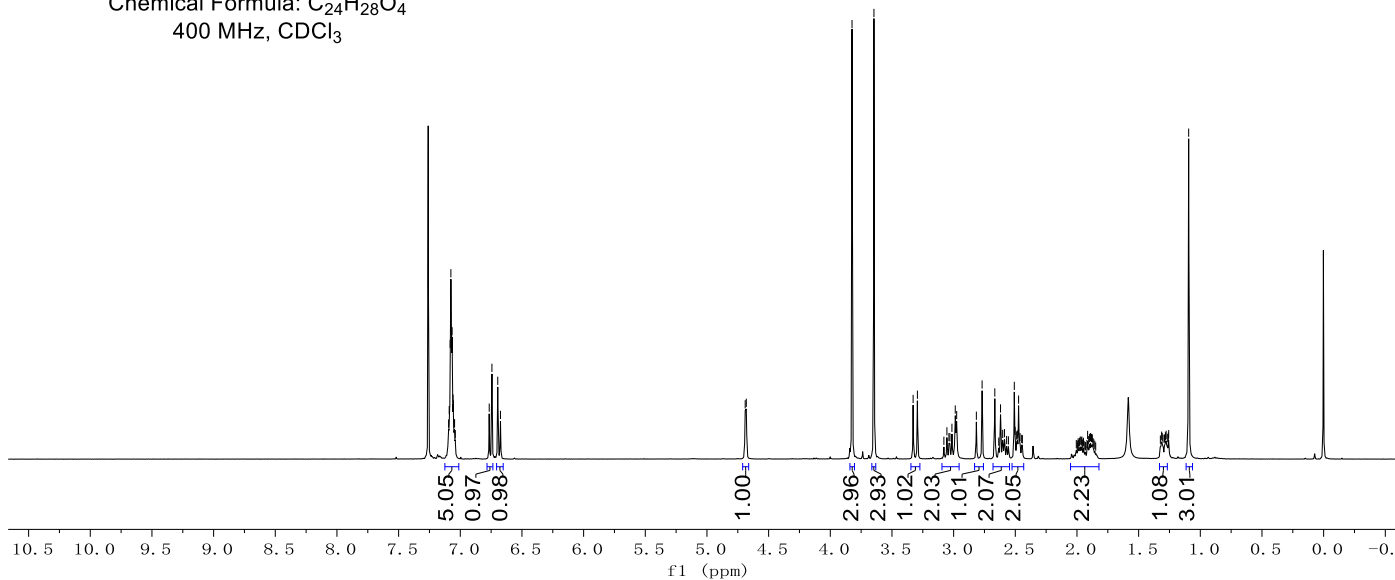

XMM-97.11.fid

216.12

151.54  
151.20  
139.30  
131.49  
127.48  
126.41  
125.73  
124.50

108.79  
107.82

67.01  
58.25  
55.72  
55.61  
40.65  
37.95  
36.59  
35.78  
33.81  
24.44  
20.29

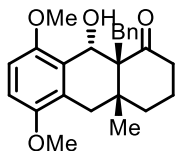

18

Chemical Formula: C<sub>24</sub>H<sub>28</sub>O<sub>4</sub>  
100 MHz, CDCl<sub>3</sub>

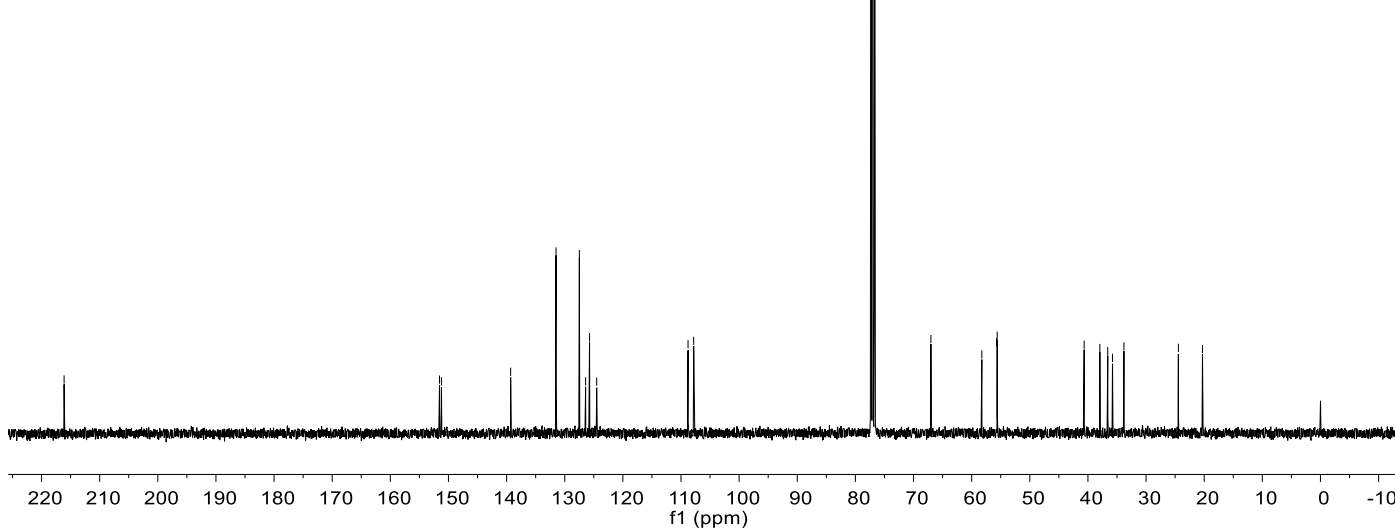

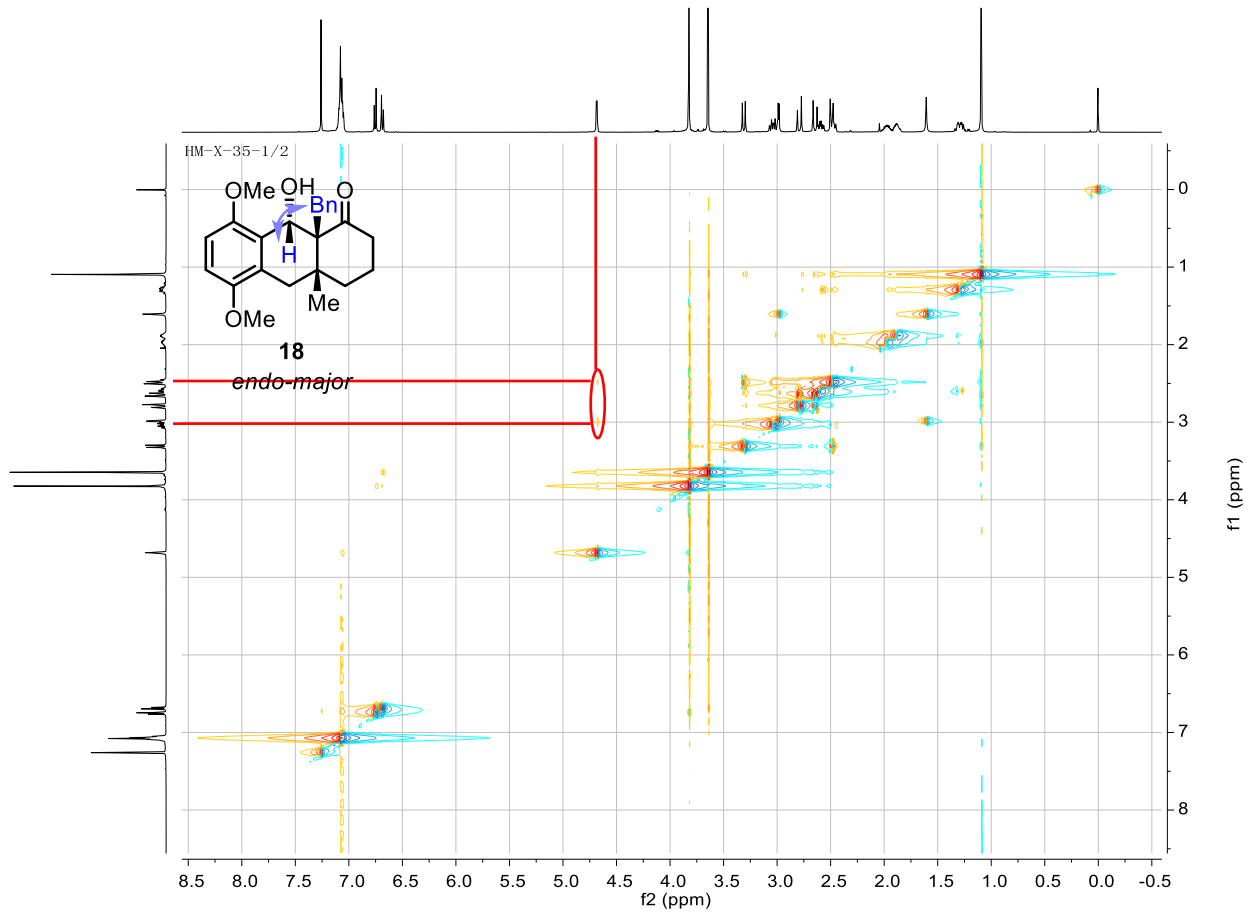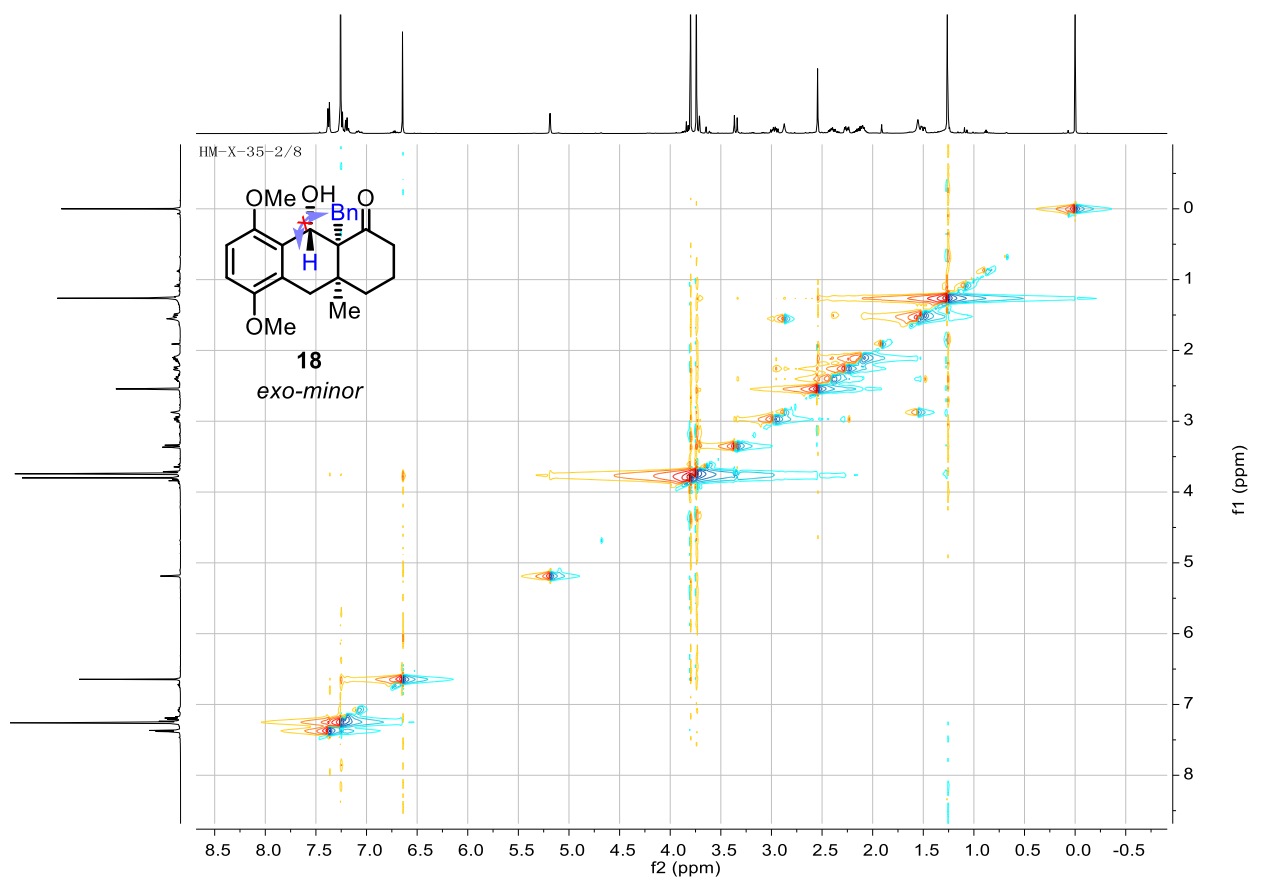

HM-IV-17B-1

7.23  
7.21  
7.19  
6.79  
6.77  
6.75  
6.73  
4.89  
4.88  
3.83  
2.98  
2.94  
2.76  
2.75  
2.69  
2.65  
2.42  
2.41  
2.40  
2.39  
2.37  
2.37  
2.30  
2.28  
2.26  
2.24  
2.22  
2.20  
2.19  
2.17  
1.62  
1.62  
1.61  
1.60  
1.59  
1.57  
0.95  
0.93

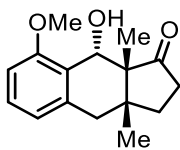

19

Chemical Formula: C<sub>16</sub>H<sub>20</sub>O<sub>3</sub>

400 MHz, CDCl<sub>3</sub>

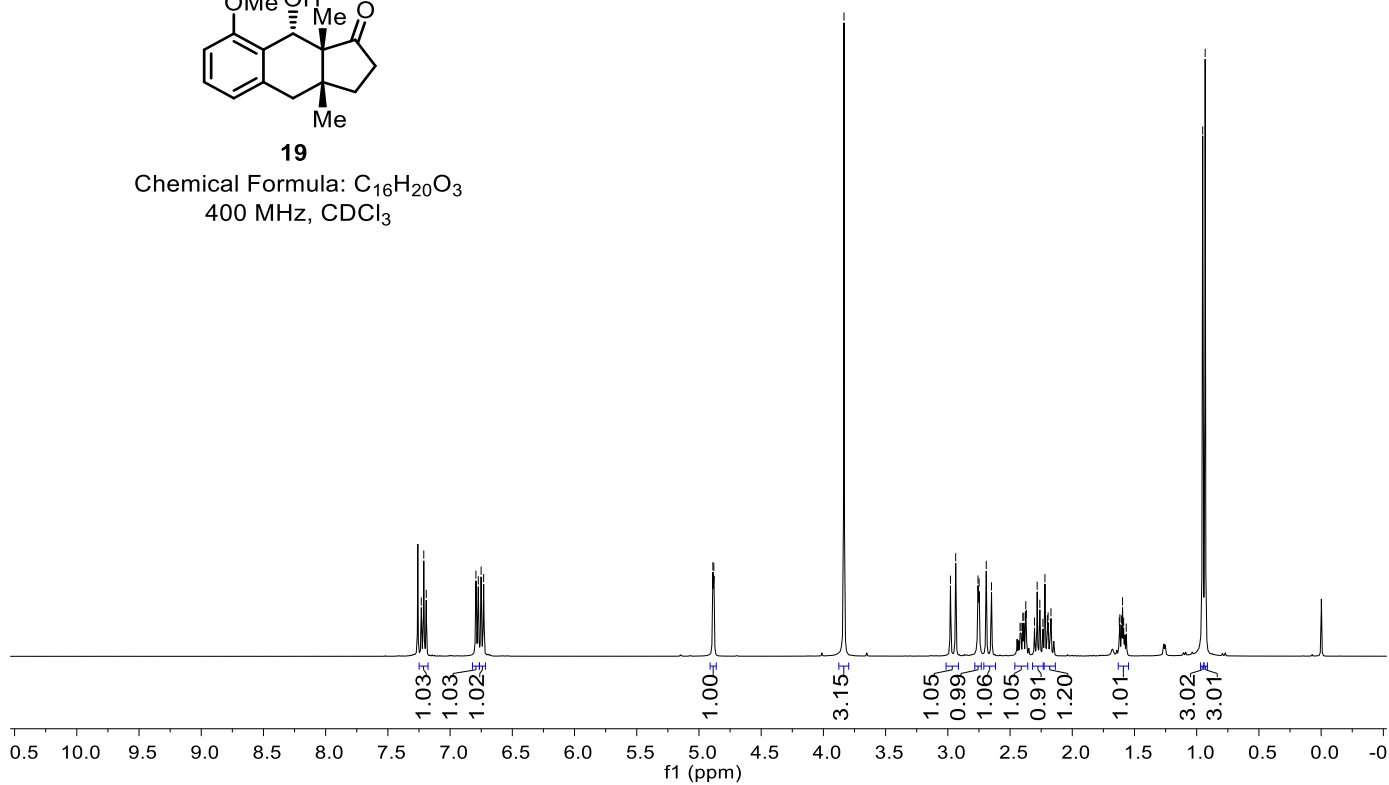

HM-IV-17B-1 C

22.669

157.61

136.58

128.68

124.63

121.31

107.97

69.61

55.44

55.41

54.26

40.02

38.97

37.26

32.56

25.95

16.62

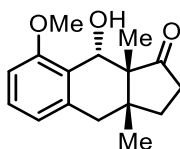

19

Chemical Formula: C<sub>16</sub>H<sub>20</sub>O<sub>3</sub>

100 MHz, CDCl<sub>3</sub>

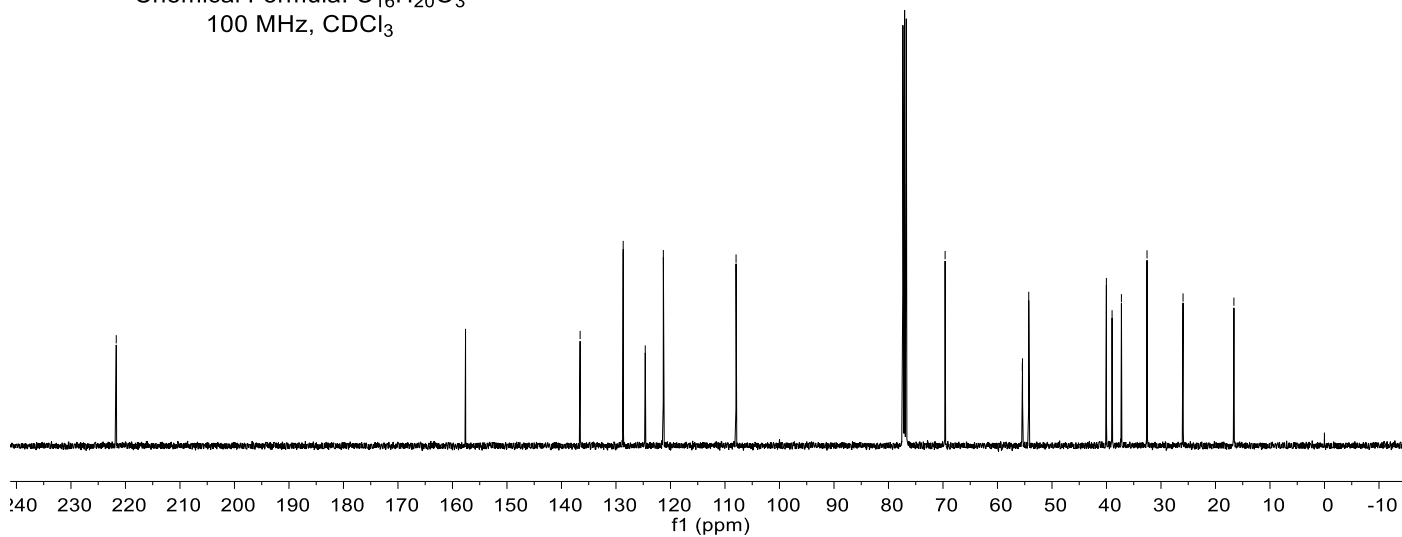



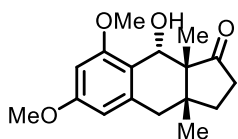

**20**

Chemical Formula: C<sub>17</sub>H<sub>22</sub>O<sub>4</sub>  
400 MHz, CDCl<sub>3</sub>

mixture of diastereoisomers  
dr = 5 : 1

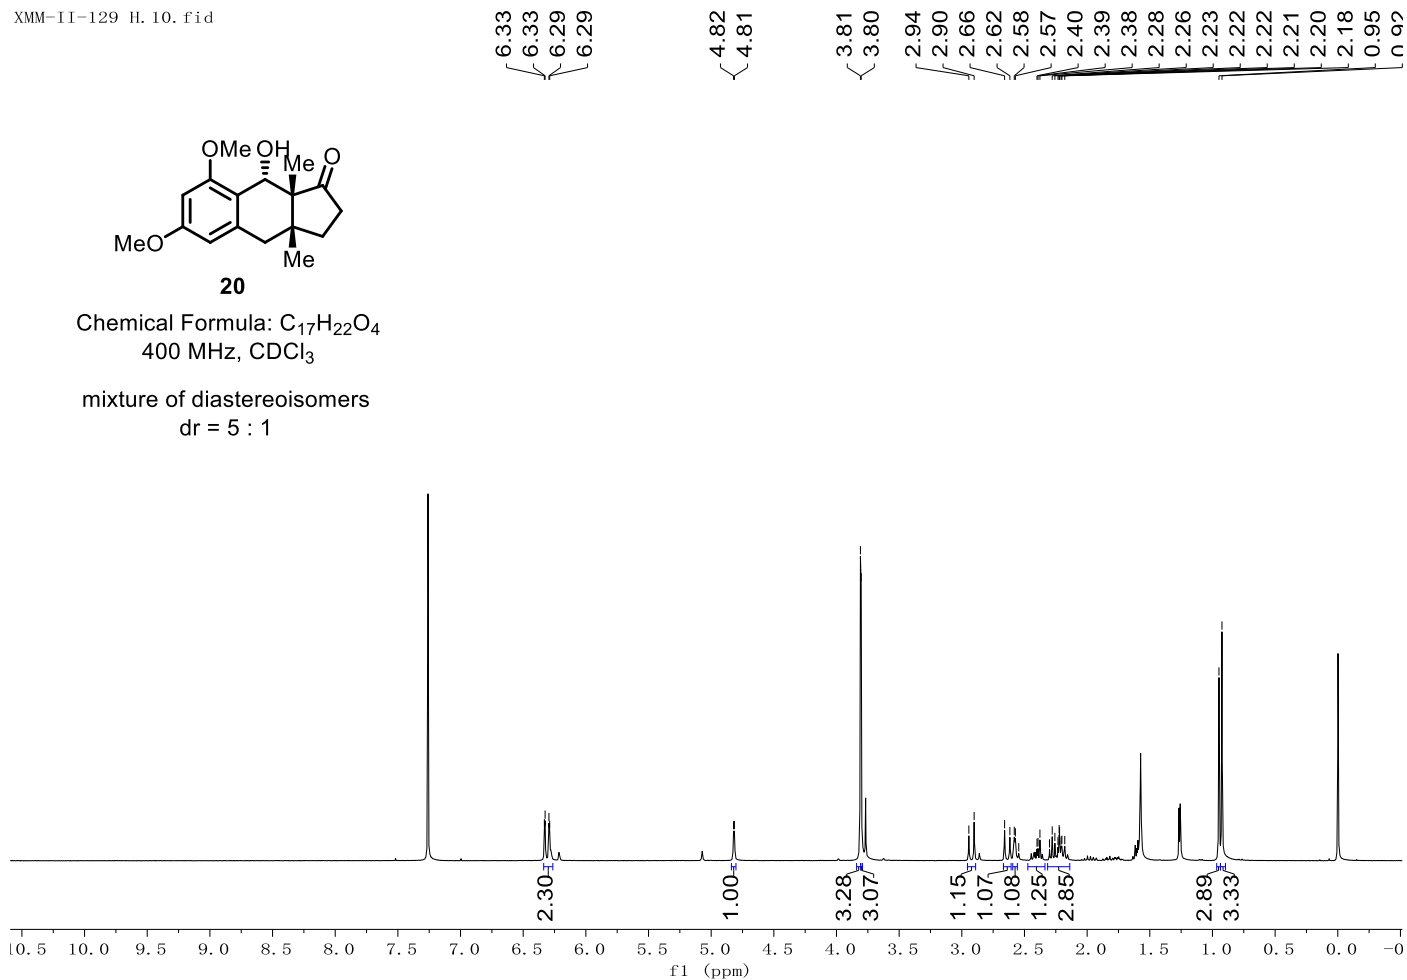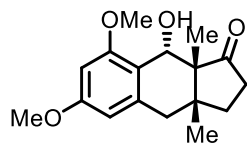

**20**

Chemical Formula: C<sub>17</sub>H<sub>22</sub>O<sub>4</sub>  
100 MHz, CDCl<sub>3</sub>

mixture of diastereoisomers  
dr = 5 : 1

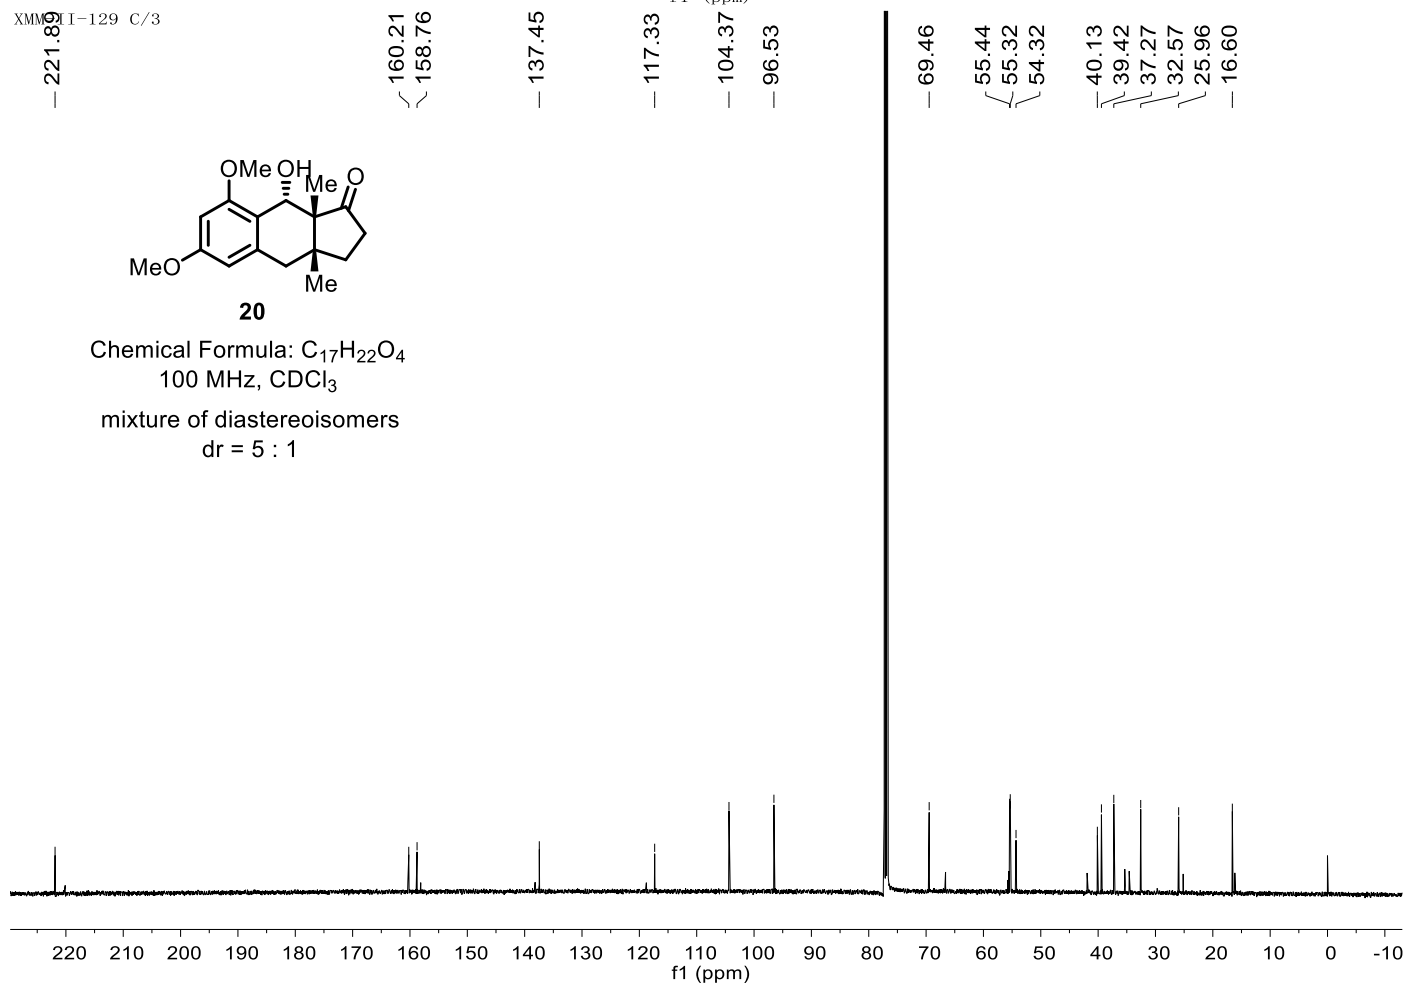

6.40  
4.85  
4.84  
3.88  
3.83  
3.77  
3.02  
2.98  
2.63  
2.61  
2.60  
2.59  
2.44  
2.43  
2.41  
2.40  
2.39  
2.38  
2.37  
2.36  
2.31  
2.30  
2.28  
2.26  
2.26  
2.23  
2.21  
2.19  
2.17  
2.16  
2.15  
2.14  
2.12  
1.64  
1.63  
1.62  
1.61  
1.60  
1.59  
1.58  
0.96  
0.90

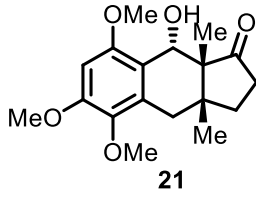

Chemical Formula: C<sub>18</sub>H<sub>24</sub>O<sub>5</sub>  
400 MHz, CDCl<sub>3</sub>

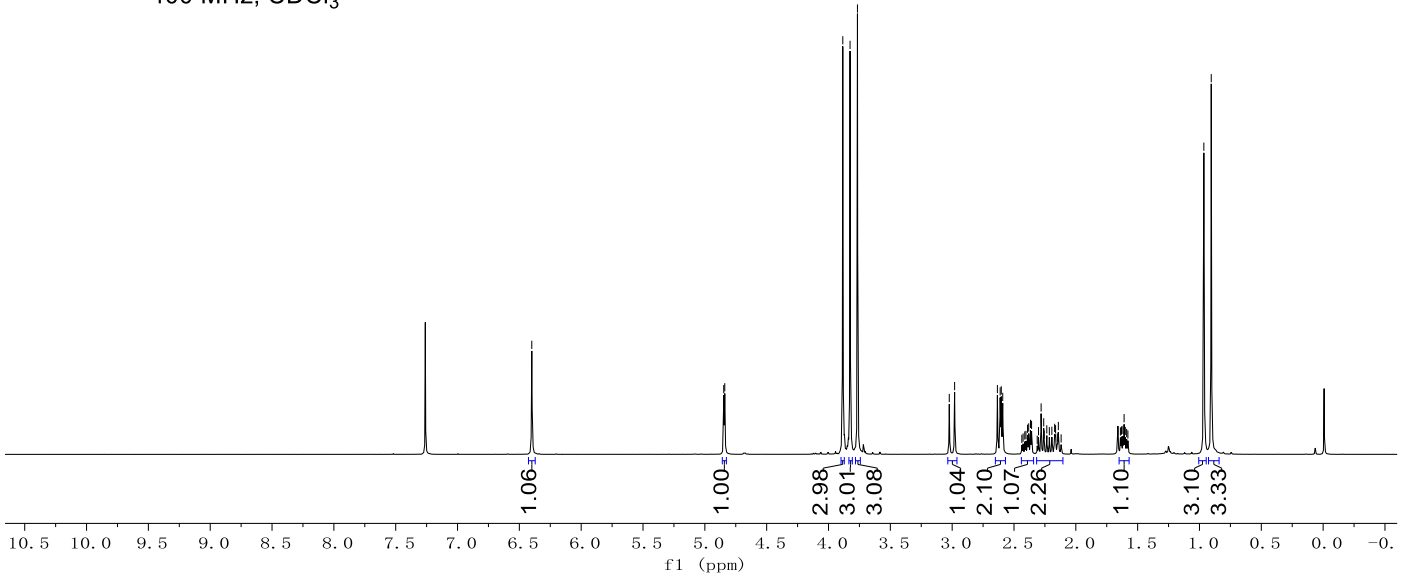

222.09

154.13  
152.58

140.20

130.47

117.10

94.62

69.57

60.46

55.95

55.79

54.01

39.89

37.30

32.90

32.78

26.11

16.74

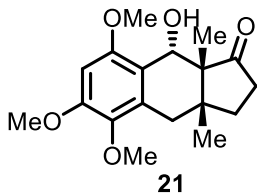

Chemical Formula: C<sub>18</sub>H<sub>24</sub>O<sub>5</sub>  
126 MHz, CDCl<sub>3</sub>

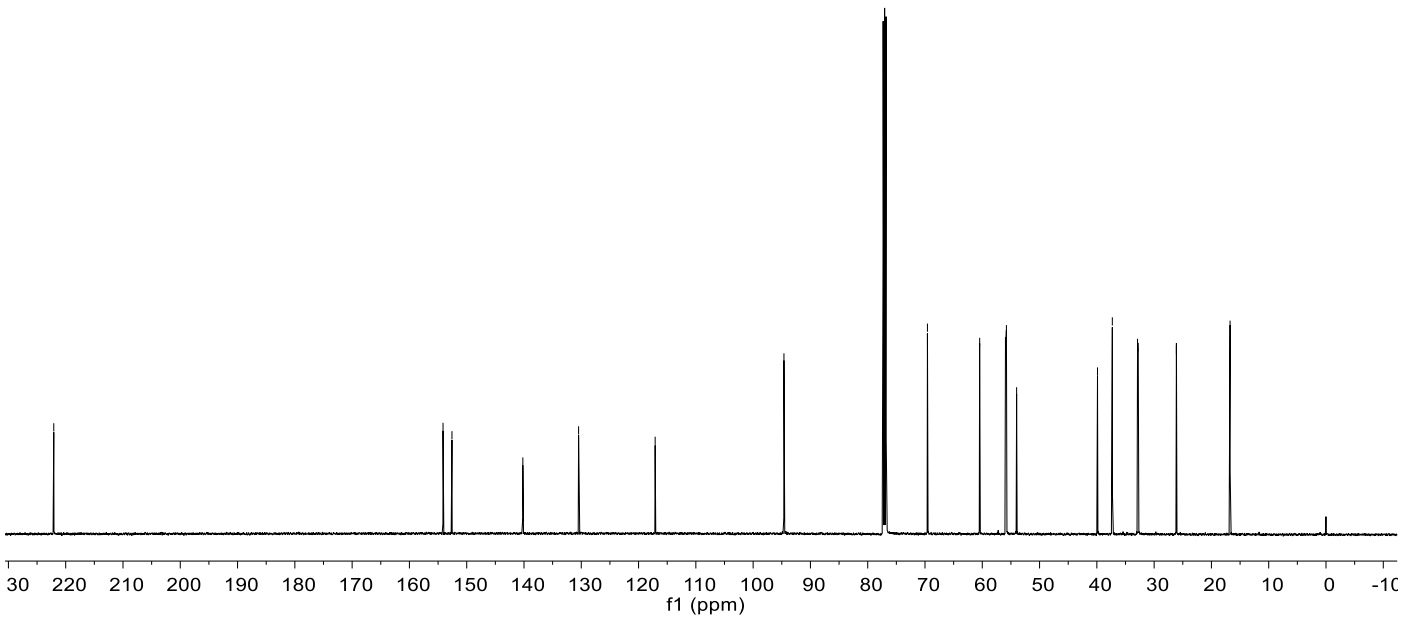

XMM-I-143-02-HC-500/1  
H

6.75  
6.74  
6.70  
6.68  
4.81  
4.80  
3.81  
3.80  
2.97  
2.94  
2.88  
2.87  
2.49  
2.45  
2.41  
2.40  
2.39  
2.38  
2.37  
2.37  
2.36  
2.35  
2.34  
2.27  
2.25  
2.25  
2.24  
2.23  
2.22  
2.21  
2.21  
2.19  
2.19  
2.17  
1.58  
1.57  
1.56  
1.55  
1.55  
1.55  
1.53  
0.99  
0.93

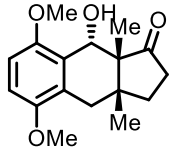

22

Chemical Formula: C<sub>17</sub>H<sub>22</sub>O<sub>4</sub>  
500 MHz, CDCl<sub>3</sub>

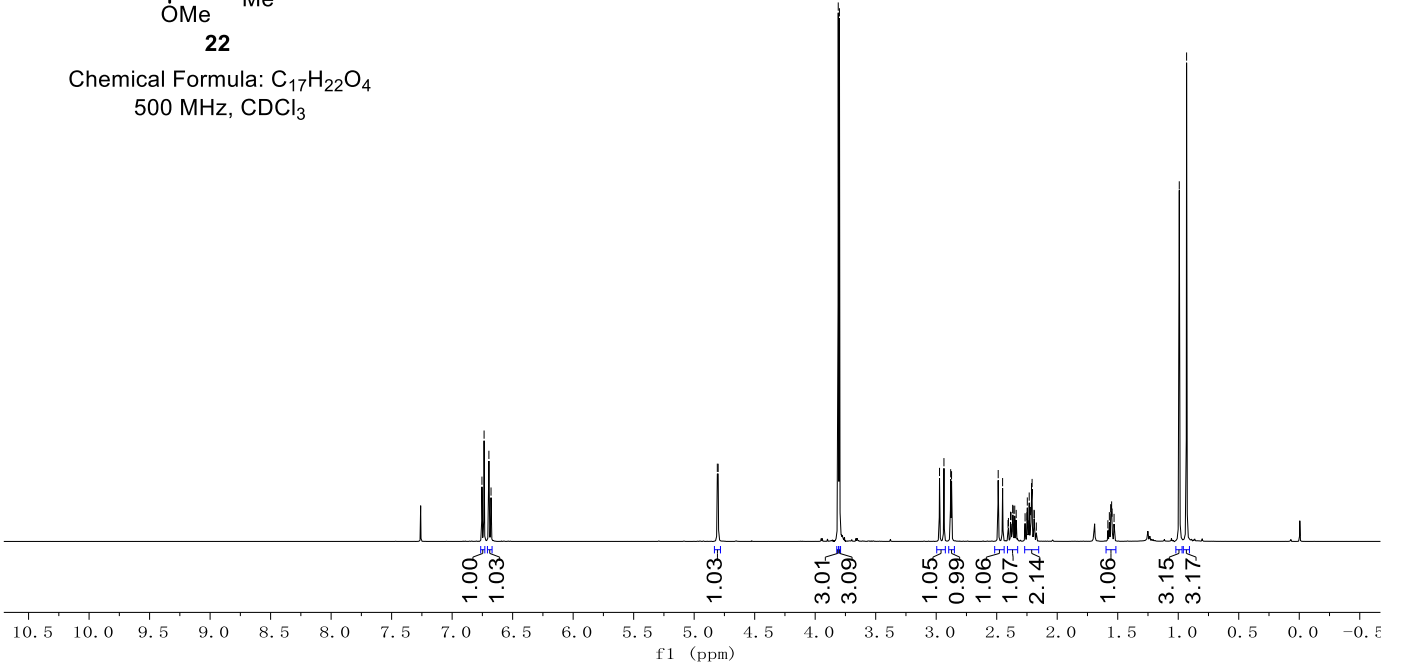

XMM-I-143-02-HC-500/2  
XMM-I-143-02-C

- 221.84

{ 151.62  
151.14

{ 125.53  
124.80

{ 109.03  
107.29

- 69.70

{ 55.71  
55.59  
53.48

{ 39.01  
37.11

{ 32.34  
32.26

{ 26.22  
16.09

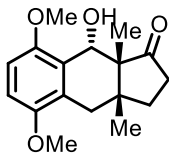

22

Chemical Formula: C<sub>17</sub>H<sub>22</sub>O<sub>4</sub>  
125 MHz, CDCl<sub>3</sub>

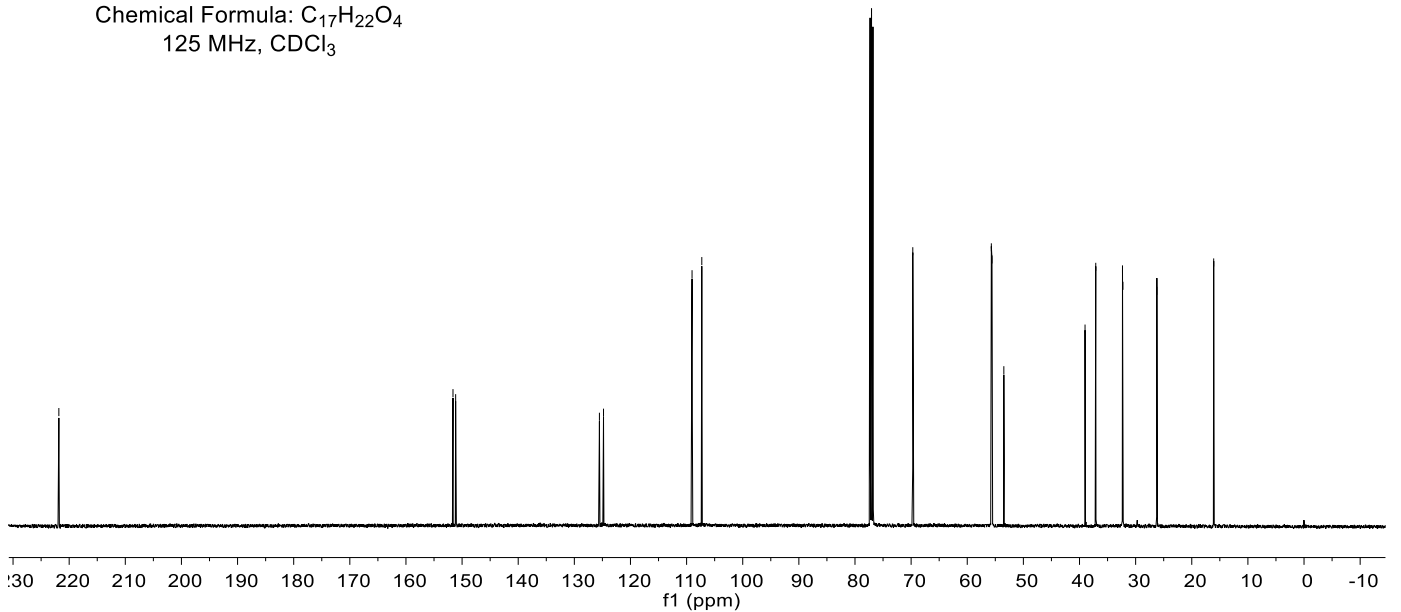

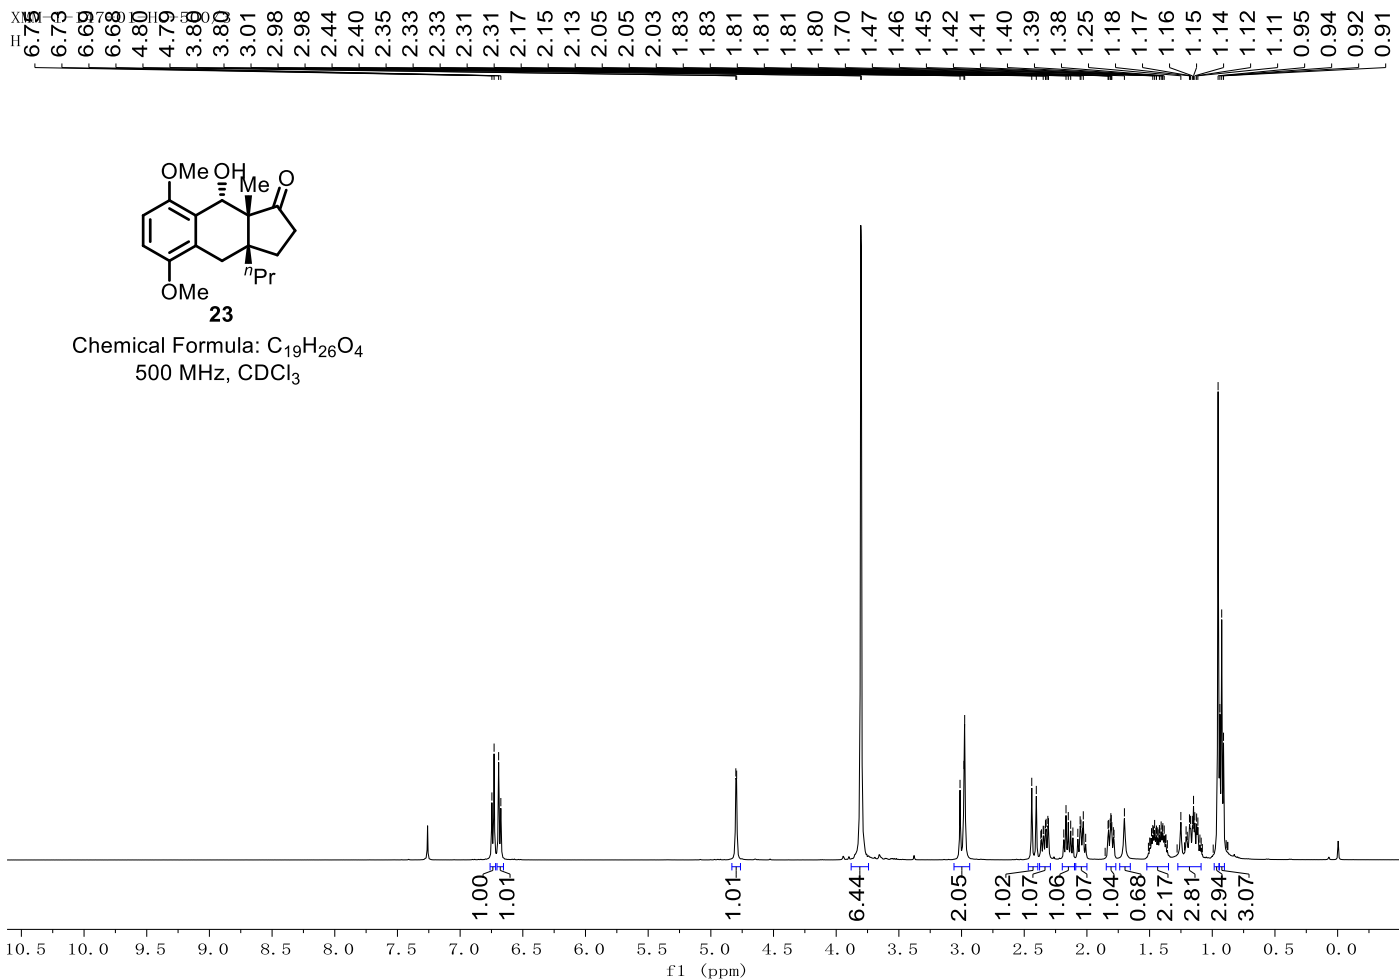

XMM-I-107-01-HC-500/4

C

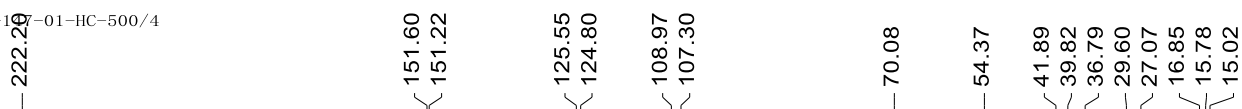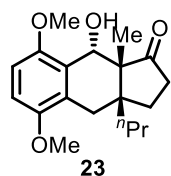

Chemical Formula: C<sub>19</sub>H<sub>26</sub>O<sub>4</sub>  
 125 MHz, CDCl<sub>3</sub>

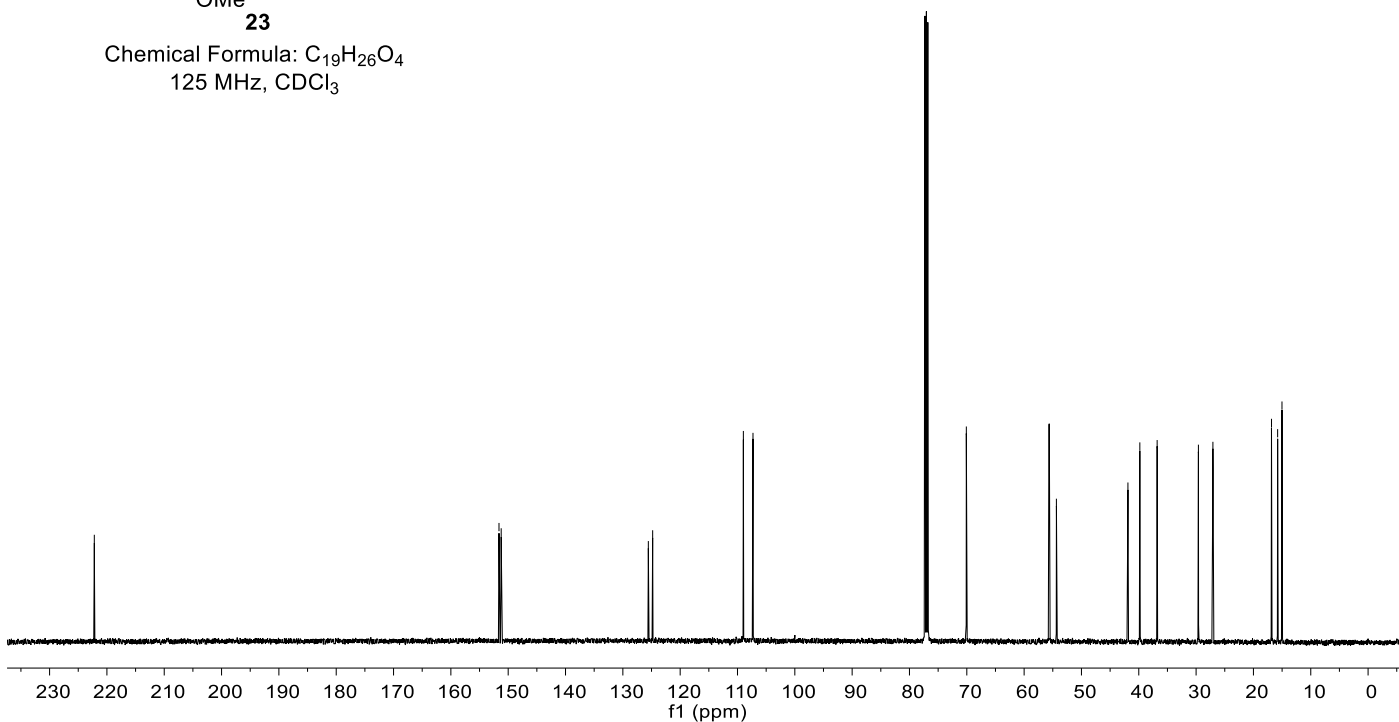

XMM-I-148-01-500  
H

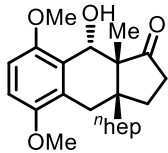

**24**

Chemical Formula: C<sub>18</sub>H<sub>24</sub>O<sub>4</sub>  
500 MHz, CDCl<sub>3</sub>

6.74  
6.73  
6.69  
6.68  
4.80  
4.80  
3.81  
3.80  
3.01  
2.98  
2.97  
2.96  
2.43  
2.40  
2.35  
2.33  
2.33  
2.31  
2.31  
2.16  
2.15  
2.13  
2.11  
2.05  
2.05  
2.03  
2.03  
1.83  
1.83  
1.82  
1.81  
1.81  
1.31  
1.30  
1.29  
1.29  
1.29  
1.28  
1.28  
1.27  
1.27  
0.95  
0.90  
0.89  
0.87

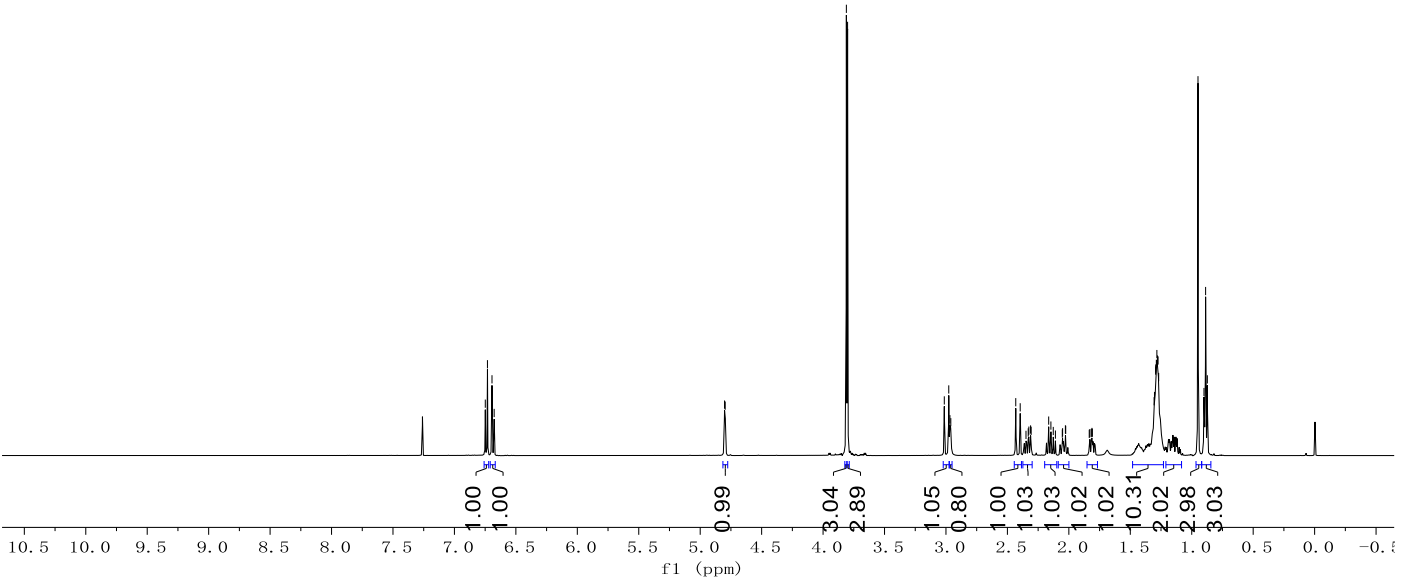

XMM-I-148-01-500-HC/5  
C

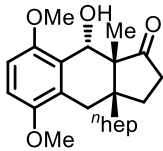

**24**

Chemical Formula: C<sub>18</sub>H<sub>24</sub>O<sub>4</sub>  
125 MHz, CDCl<sub>3</sub>

222.29  
151.60  
151.23  
125.57  
124.83  
108.96  
107.29  
70.09  
55.66  
55.61  
54.41  
41.83  
37.36  
36.81  
31.90  
30.54  
29.34  
27.02  
23.60  
22.68  
15.79  
14.13

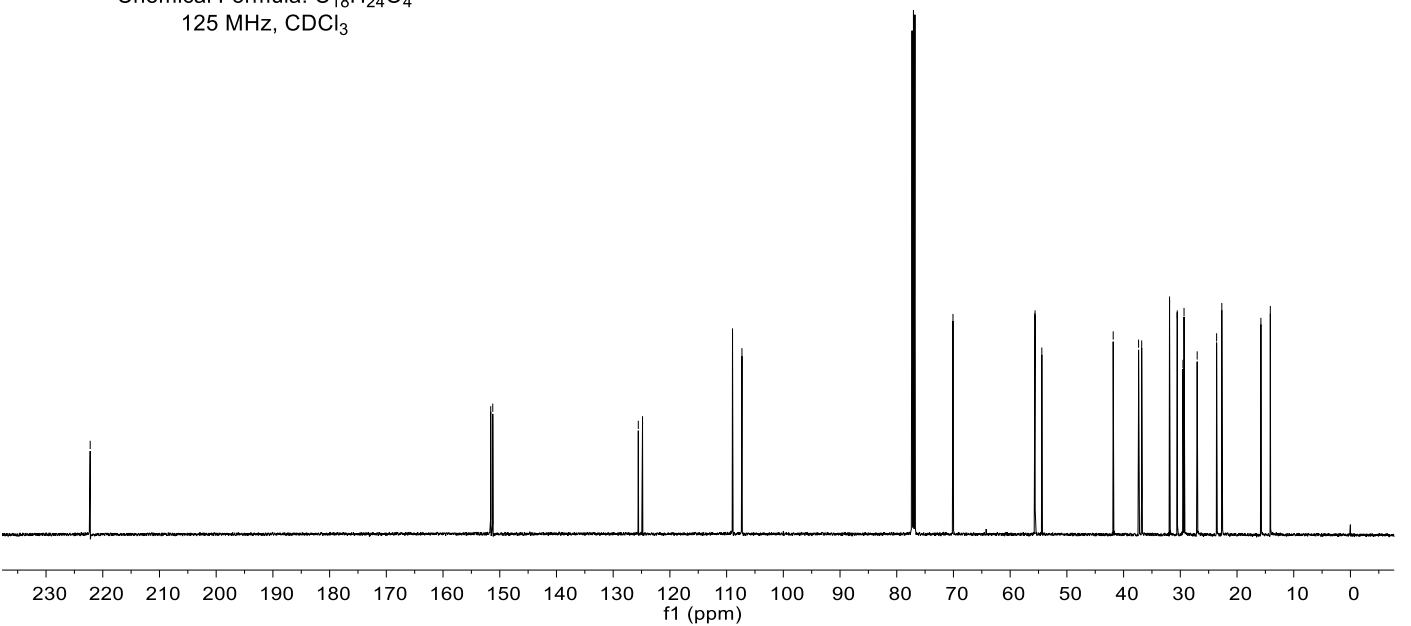

7.36  
7.35  
7.34  
7.34  
7.33  
7.33  
7.32  
7.29  
7.29  
7.28  
7.27  
7.21  
7.21  
7.20  
7.20  
7.19  
7.19  
6.75  
6.73  
6.71  
6.69  
4.87  
4.86  
3.82  
3.79  
3.14  
3.13  
2.89  
2.86  
2.66  
2.63  
2.58  
2.58  
2.56  
2.56  
2.43  
2.42  
2.41  
2.40  
2.40  
2.39  
2.38  
2.37  
2.35  
1.88  
1.87  
1.73  
1.72  
1.71  
1.12

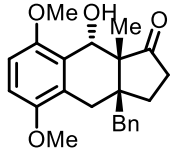

25

Chemical Formula:  $C_{23}H_{26}O_4$   
500 MHz,  $CDCl_3$

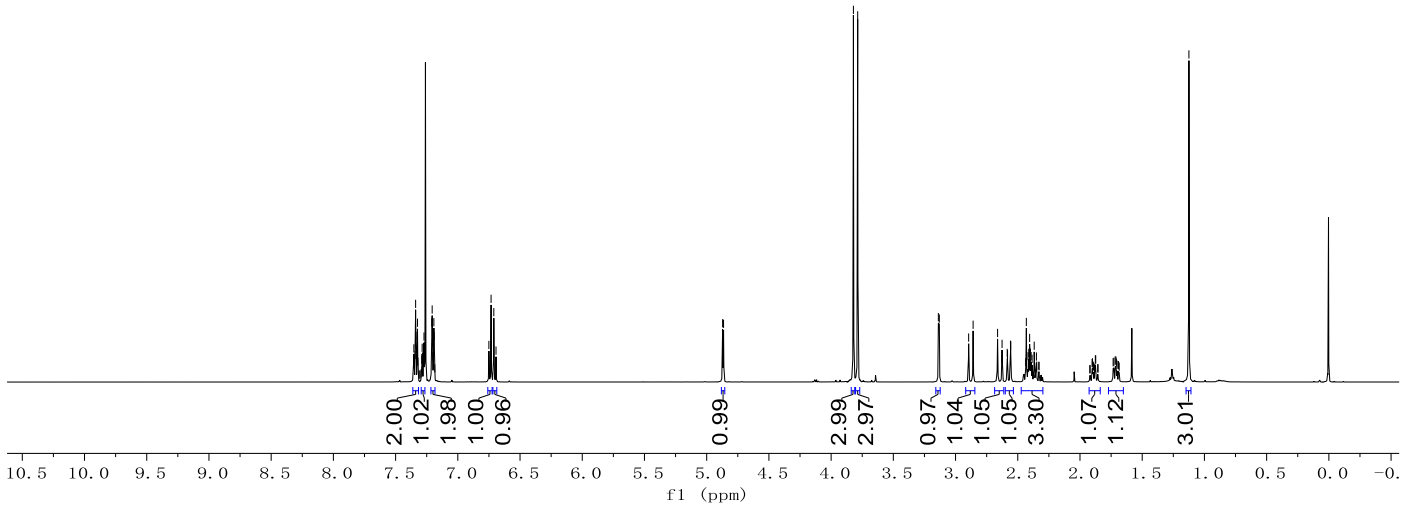

XMM-II-902-500-HC/2

-221.46  
151.56  
151.20  
137.81  
130.46  
128.11  
126.41  
125.41  
124.34  
109.00  
107.46  
70.33  
55.65  
55.62  
54.68  
43.19  
42.65  
36.82  
29.31  
26.48  
15.81

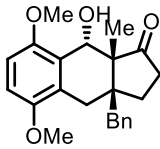

25

Chemical Formula:  $C_{23}H_{26}O_4$   
125 MHz,  $CDCl_3$

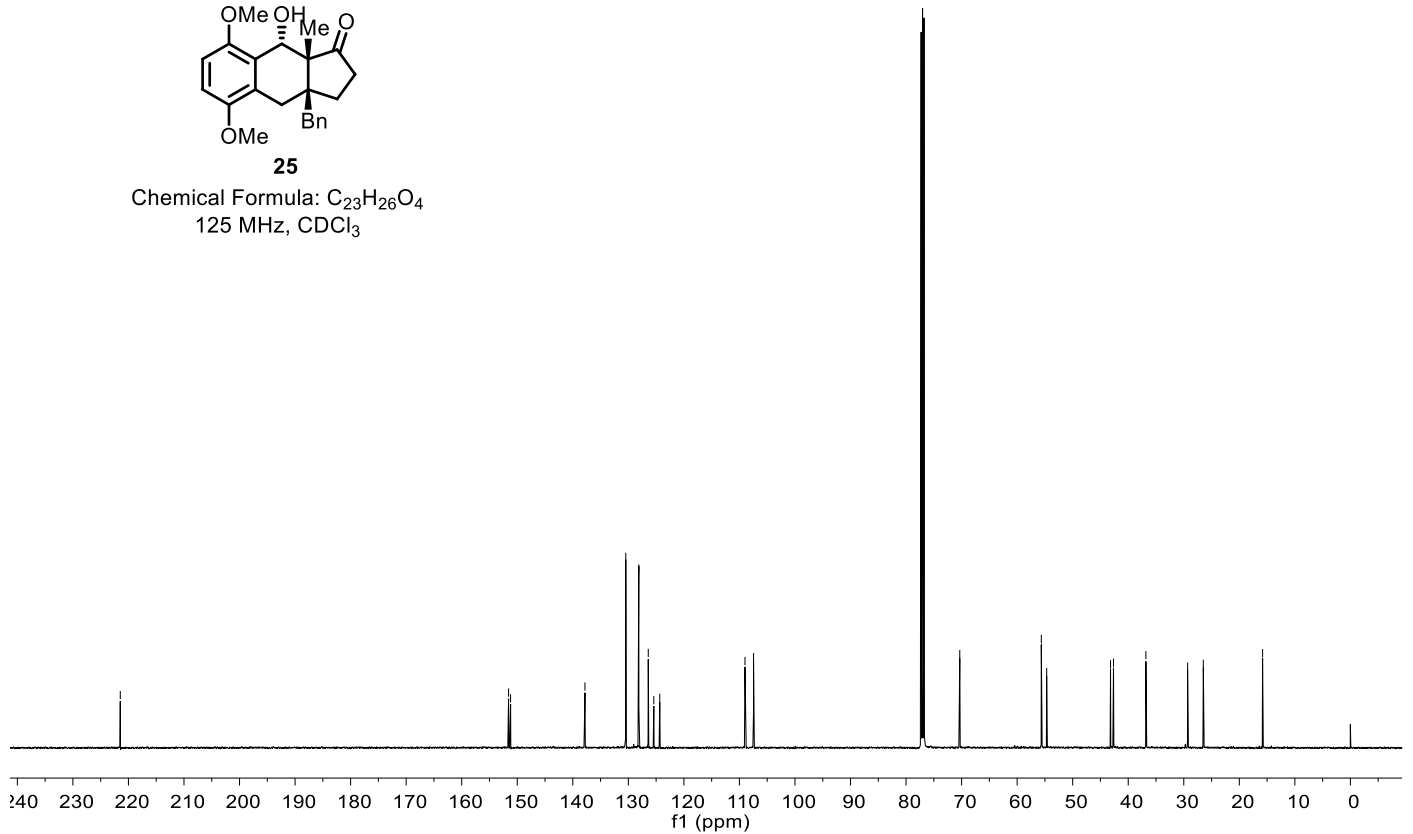

6.72  
6.70  
6.68  
4.94  
3.88  
3.84  
3.02  
3.01  
2.95  
2.91  
2.57  
2.53  
2.33  
2.33  
2.32  
2.31  
2.30  
2.24  
2.23  
2.22  
2.21  
2.19  
2.17  
2.17  
2.15  
2.15  
2.13  
1.79  
1.77  
1.77  
1.75  
1.74  
1.52  
1.51  
1.51  
1.50  
1.50  
1.49  
1.48  
1.39  
1.38  
1.37  
1.37  
1.36  
1.36  
1.34  
1.33  
1.12  
1.06  
0.93

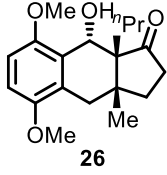

Chemical Formula: C<sub>19</sub>H<sub>26</sub>O<sub>4</sub>  
500 MHz, CDCl<sub>3</sub>

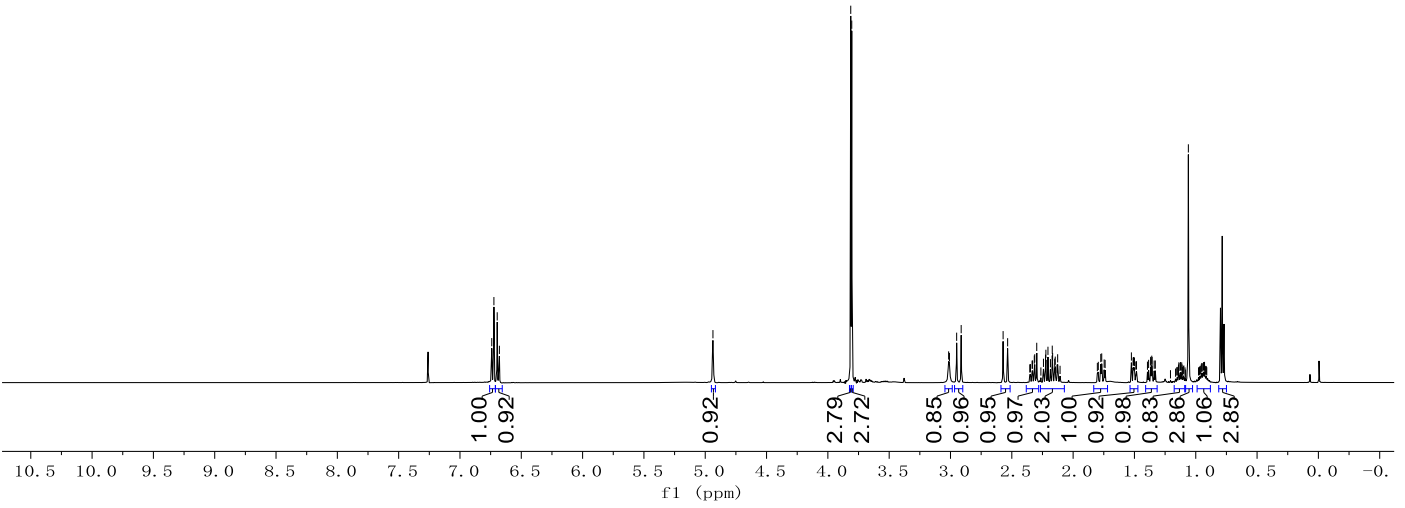

XMM-I-17-02-500-HC/2  
C

221.62  
151.18  
150.94  
126.86  
124.87  
108.67  
107.14  
68.09  
55.86  
55.59  
55.53  
39.44  
36.85  
35.37  
34.34  
33.10  
25.62  
16.61  
15.23

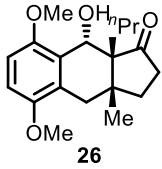

Chemical Formula: C<sub>19</sub>H<sub>26</sub>O<sub>4</sub>  
125 MHz, CDCl<sub>3</sub>

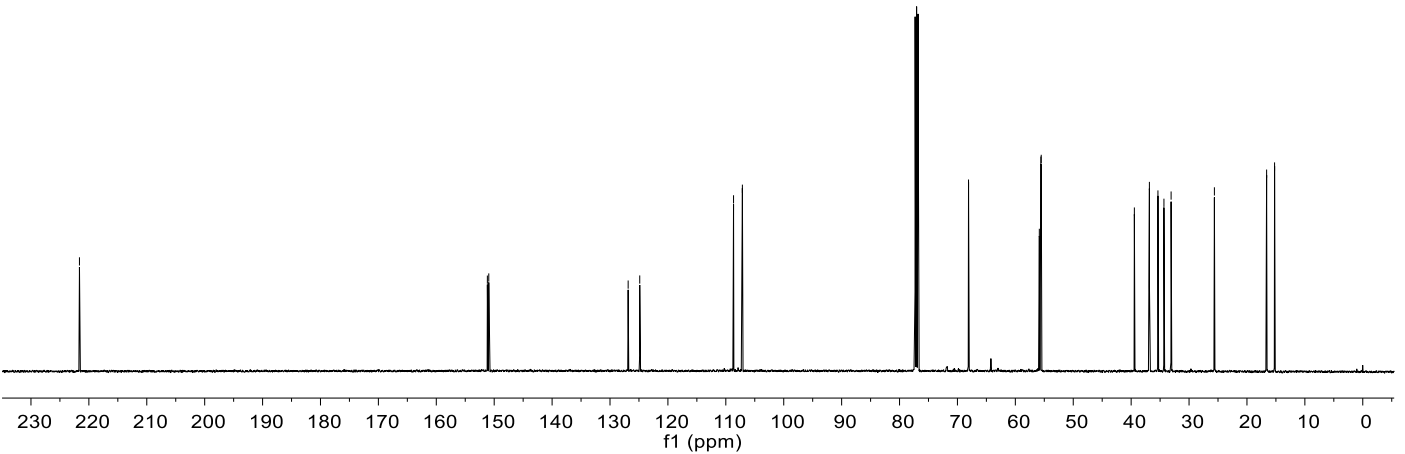

6.74  
6.73  
6.70  
6.68  
4.93  
3.82  
3.81  
3.04  
3.03  
2.95  
2.91  
2.57  
2.53  
2.32  
2.31  
2.30  
2.29  
2.22  
2.22  
2.20  
2.18  
2.17  
2.16  
2.14  
2.13  
2.11  
1.78  
1.78  
1.52  
1.52  
1.51  
1.51  
1.50  
1.50  
1.39  
1.38  
1.38  
1.37  
1.22  
1.22  
1.20  
1.19  
1.15  
1.14  
1.13  
1.12  
1.11  
1.06  
0.83  
0.82  
0.81

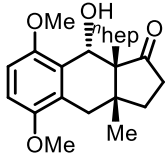

27

Chemical Formula: C<sub>23</sub>H<sub>34</sub>O<sub>4</sub>  
500 MHz, CDCl<sub>3</sub>

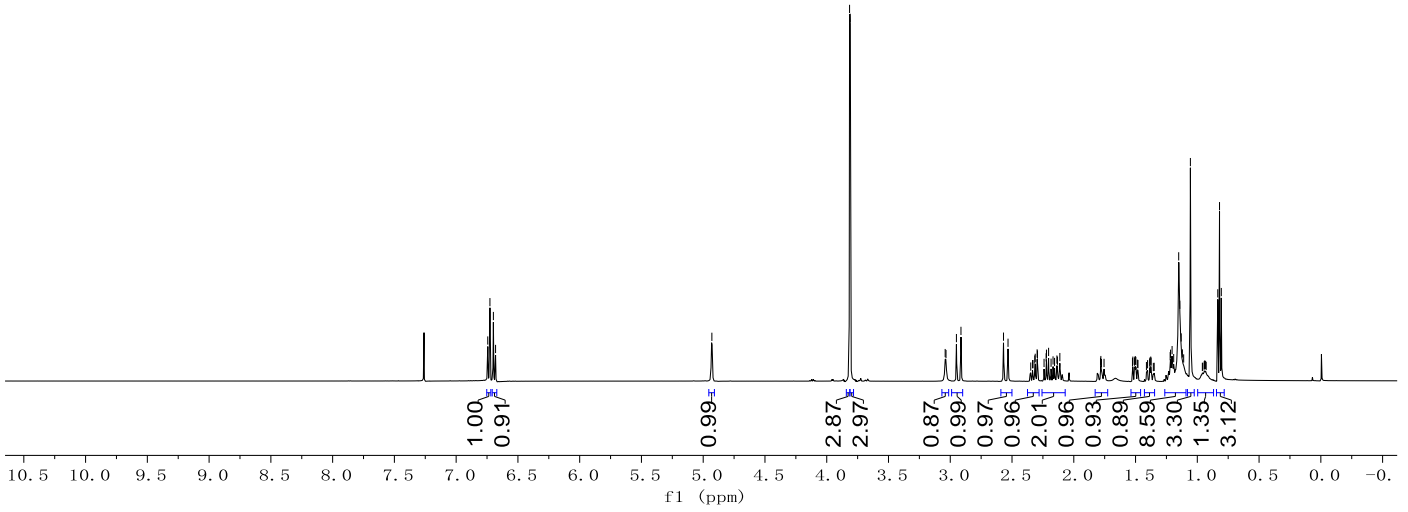

XMM-148-02-500-HC/7  
C

221.70  
151.19  
150.96  
126.91  
124.89  
108.71  
107.19  
68.09  
55.79  
55.62  
55.54  
39.53  
36.85  
34.28  
33.05  
32.92  
31.88  
30.66  
28.78  
25.53  
22.94  
22.59  
14.09

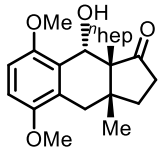

27

Chemical Formula: C<sub>23</sub>H<sub>34</sub>O<sub>4</sub>  
125 MHz, CDCl<sub>3</sub>

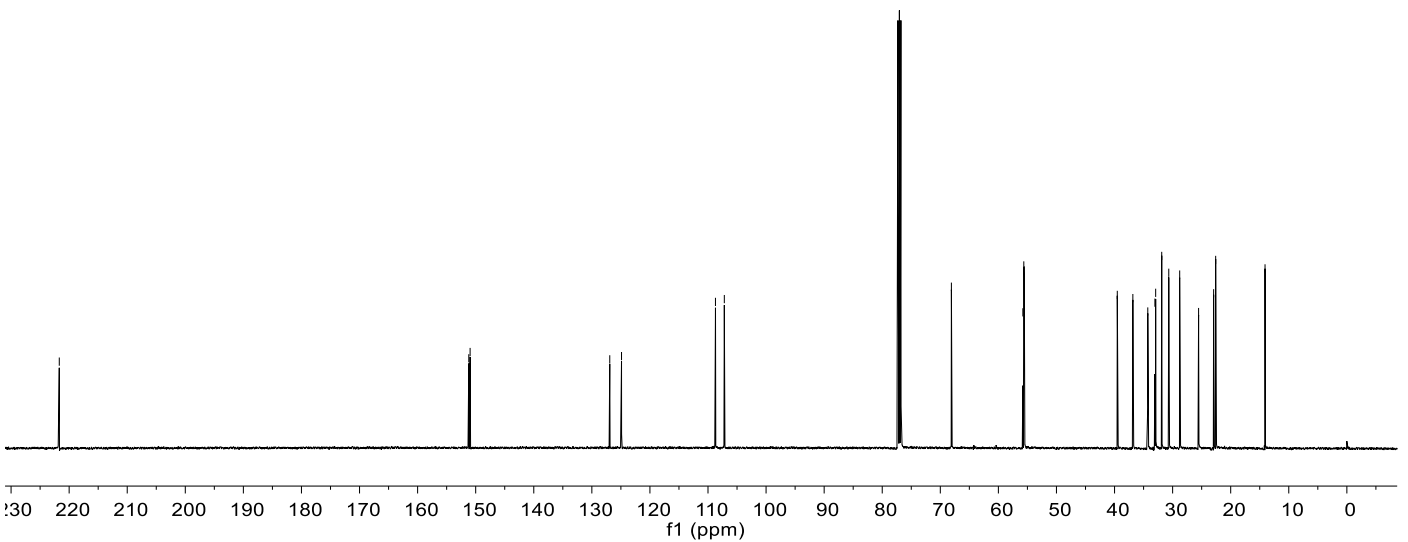



XMM-98 C. 20. fid  
 7.11 7.10 7.09 7.08 7.07 7.03 7.03 7.02 7.01 6.65 6.63 6.62 6.59 5.12 5.11 3.74 3.73 3.13 3.09 2.85 2.80 2.76 2.75 2.57 2.53 2.39 2.39 2.37 2.37 2.36 2.34 2.34 2.33 2.30 2.29 2.28 2.27 2.26 2.26 2.24 2.23 2.23 1.55 1.54 1.53 1.53 1.52 1.52 1.51 1.20

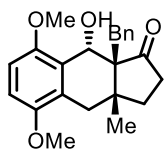

28

Chemical Formula: C<sub>23</sub>H<sub>26</sub>O<sub>4</sub>  
 400 MHz, CDCl<sub>3</sub>

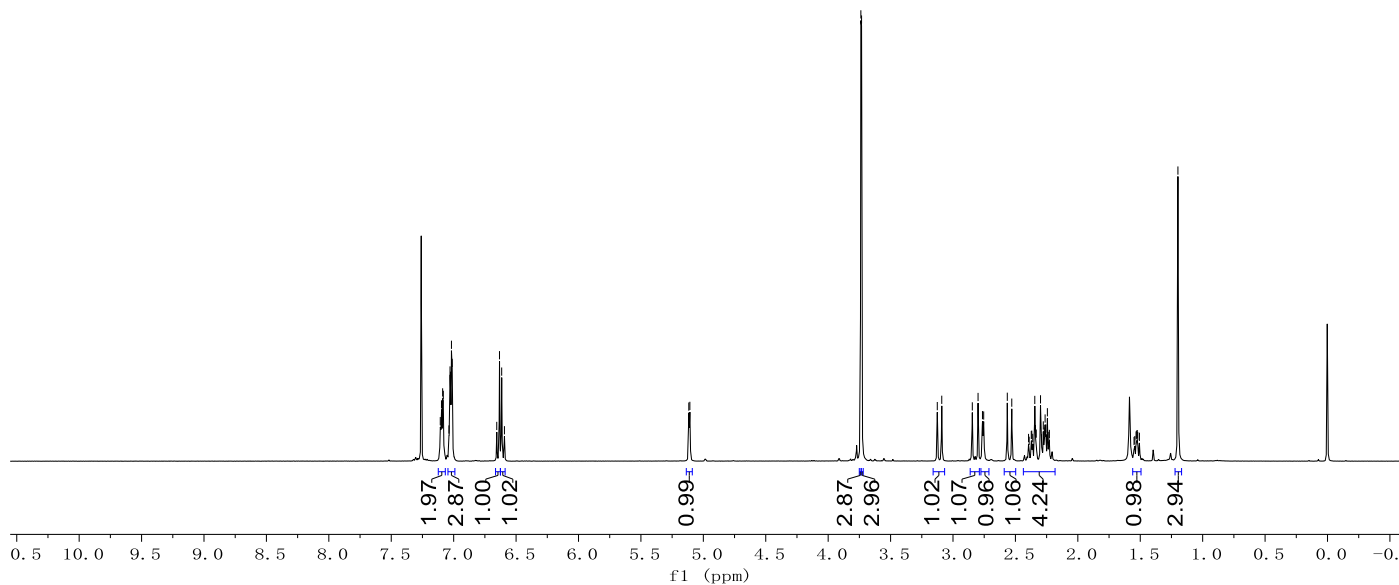

XMM-98 C. 20. fid  
 XMM-98 C  
 220.93  
 151.12 151.06 137.63 130.54 127.45 126.02 125.83 124.89 108.99 107.26 66.53 56.95 55.72 55.66 39.87 36.99 36.98 33.16 32.89 25.92

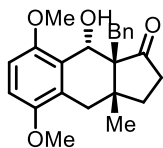

28

Chemical Formula: C<sub>23</sub>H<sub>26</sub>O<sub>4</sub>  
 100 MHz, CDCl<sub>3</sub>

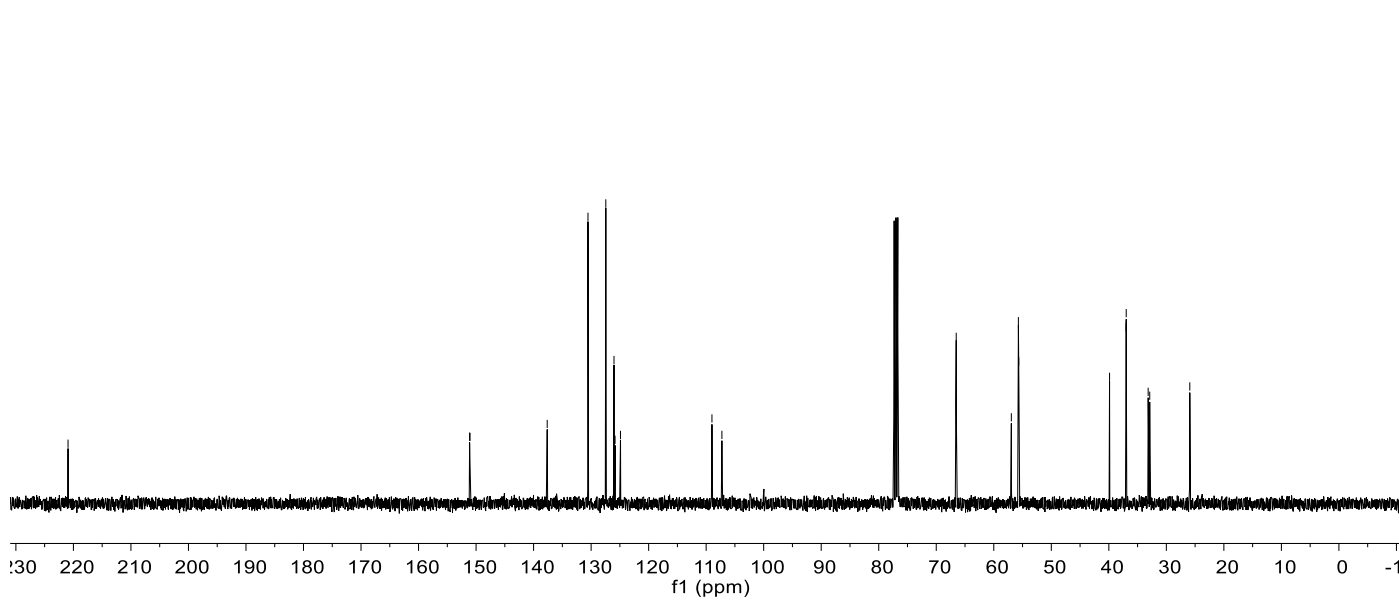

HM-VI-884  
99C-1

6.76  
6.74  
6.73  
6.71

5.13

3.86  
3.80  
3.63  
3.62  
3.61

2.78  
2.74  
2.58  
2.53

1.66  
1.60  
1.58  
1.56  
1.55  
1.54  
1.53  
1.51  
1.50  
1.46  
1.44  
1.43  
1.16

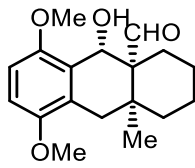

29

Chemical Formula: C<sub>18</sub>H<sub>24</sub>O<sub>4</sub>  
400 MHz, CDCl<sub>3</sub>

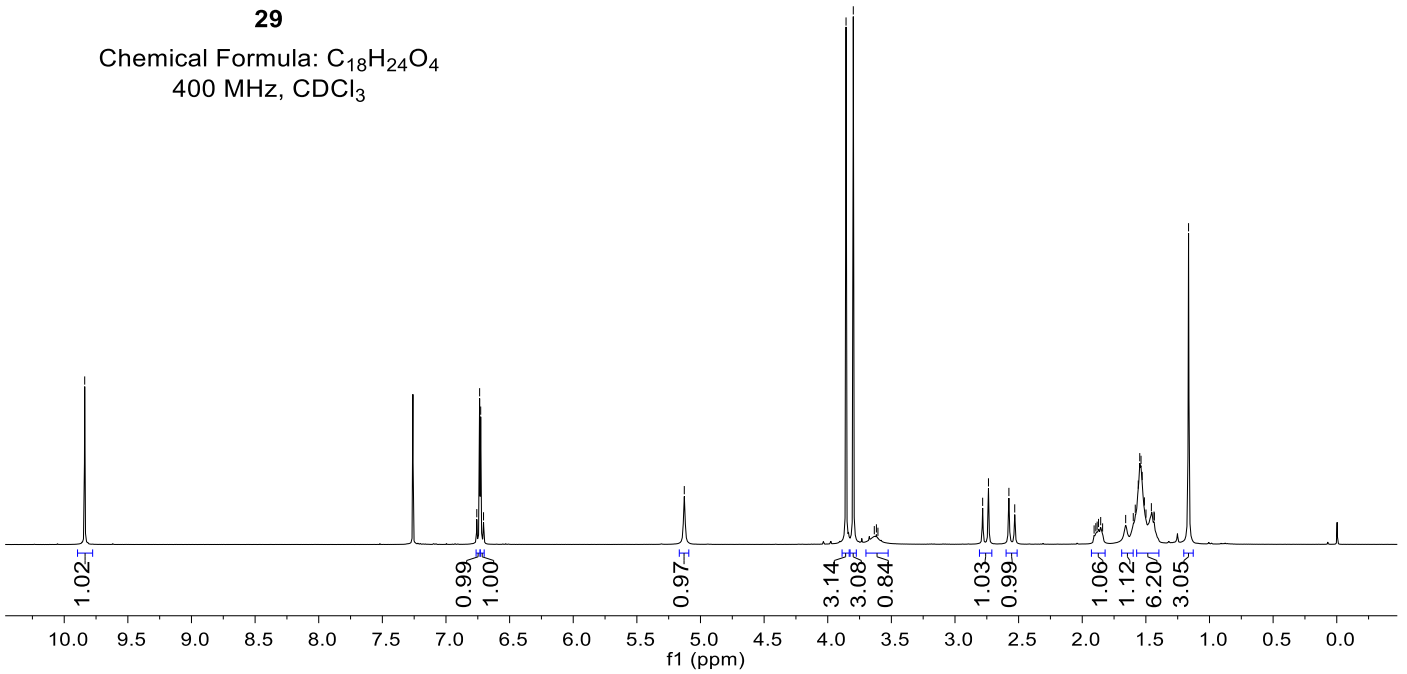

HM-VI-879  
99C-1 C

151.88  
151.45

125.56  
124.99

108.87  
107.46

68.47

55.74  
55.62  
54.08

35.15  
34.82  
33.89  
24.26  
20.93  
20.73

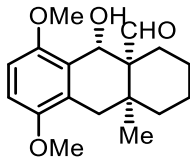

29

Chemical Formula: C<sub>18</sub>H<sub>24</sub>O<sub>4</sub>  
125 MHz, CDCl<sub>3</sub>

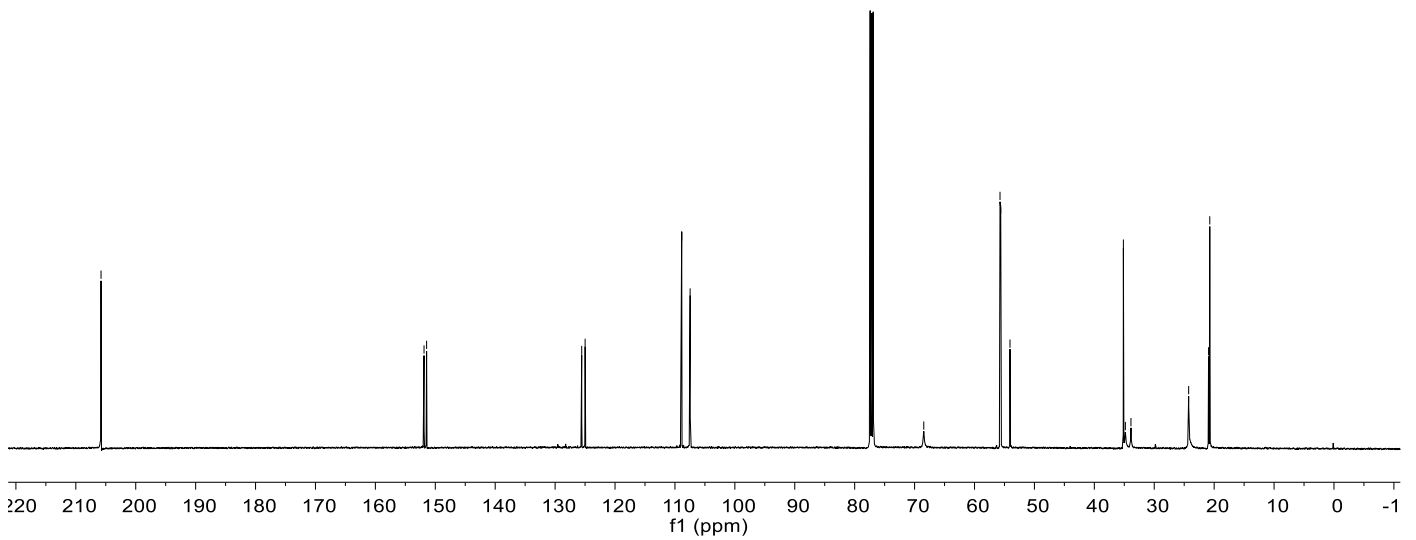

8.81  
 6.76  
 6.74  
 6.73  
 6.71  
 5.21  
 3.96  
 3.86  
 3.80  
 2.82  
 2.77  
 2.65  
 2.61  
 2.00  
 1.99  
 1.98  
 1.97  
 1.96  
 1.94  
 1.94  
 1.93  
 1.92  
 1.91  
 1.89  
 1.75  
 1.71  
 1.65  
 1.61  
 1.60  
 1.58  
 1.58  
 1.47  
 1.46  
 1.46  
 1.45  
 1.45  
 1.36  
 1.34  
 1.33  
 1.32  
 1.31  
 1.30  
 1.29  
 1.27  
 1.27  
 1.26  
 1.25  
 1.14  
 0.91  
 0.89

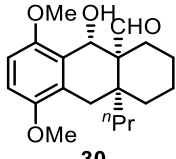

30

Chemical Formula: C<sub>20</sub>H<sub>28</sub>O<sub>4</sub>  
 400 MHz, CDCl<sub>3</sub>

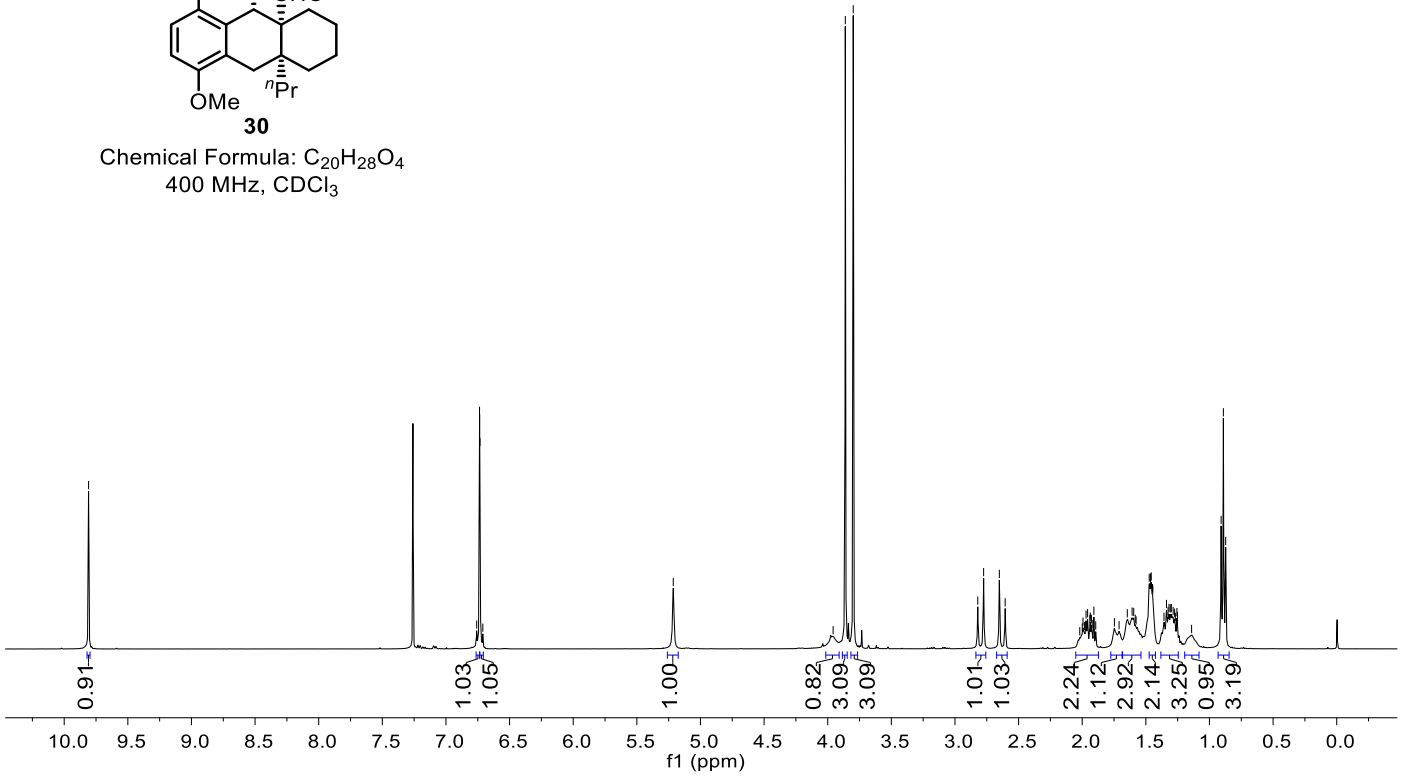

HM-VI-373  
 203.73  
 A-1 C

151.80  
 151.41

125.41  
 124.94

108.71  
 107.47

67.66  
 55.66  
 55.61  
 55.54  
 55.49  
 54.73  
 36.90  
 36.79  
 31.69  
 29.75  
 22.50  
 20.55  
 20.30  
 15.83  
 14.93

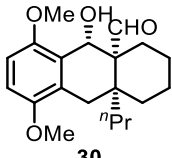

30

Chemical Formula: C<sub>20</sub>H<sub>28</sub>O<sub>4</sub>  
 100 MHz, CDCl<sub>3</sub>

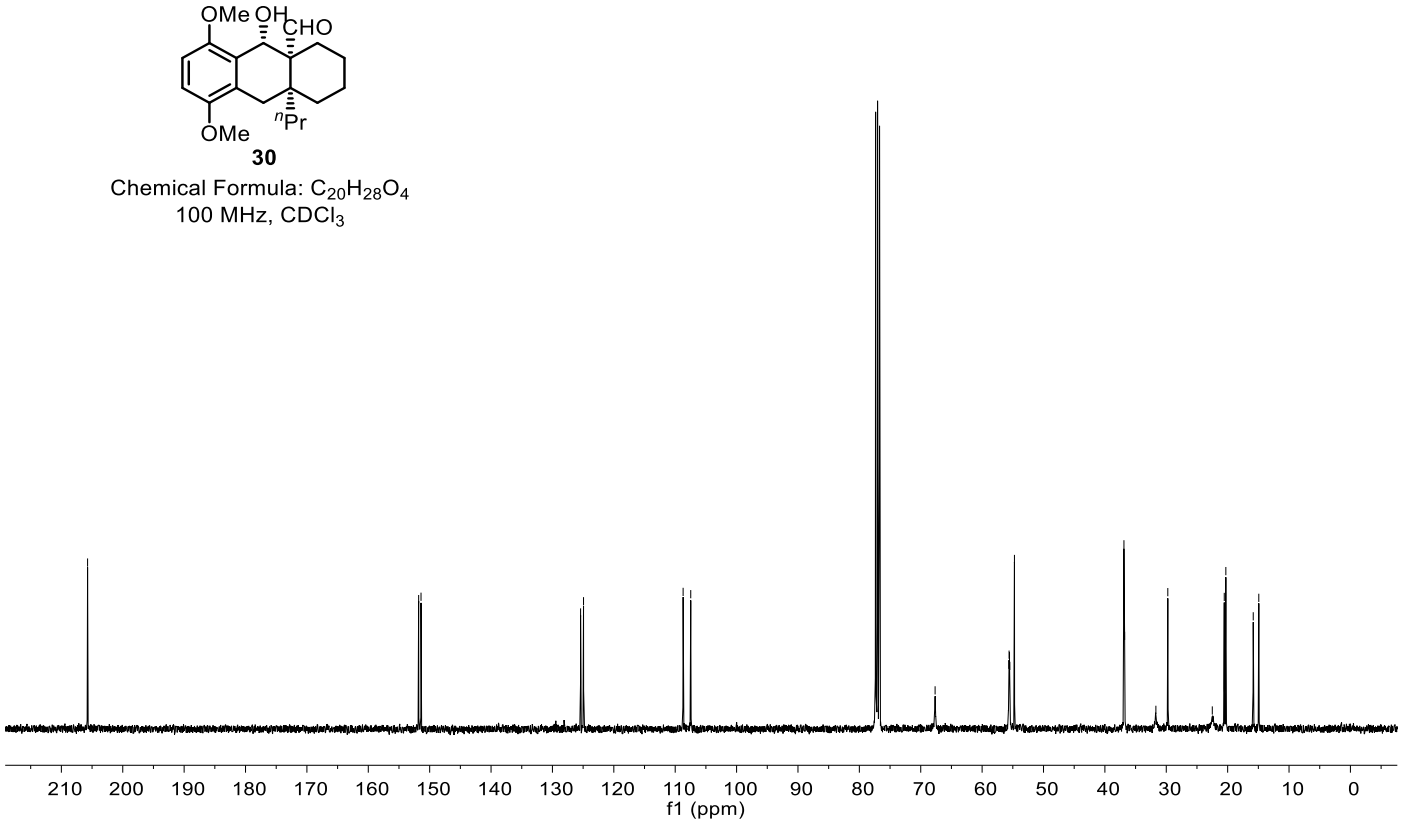

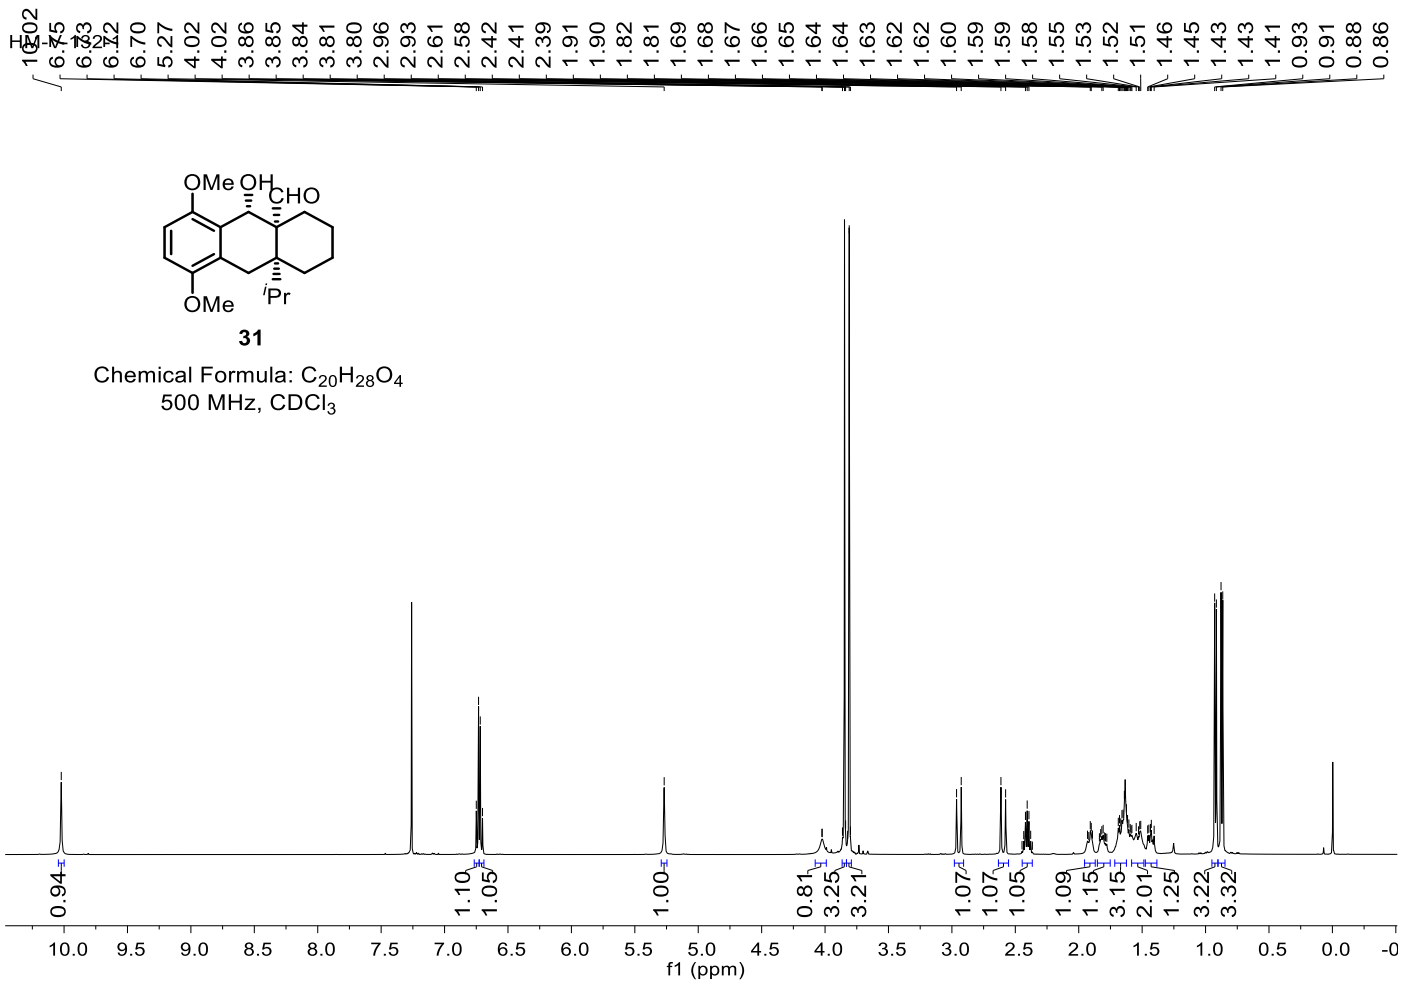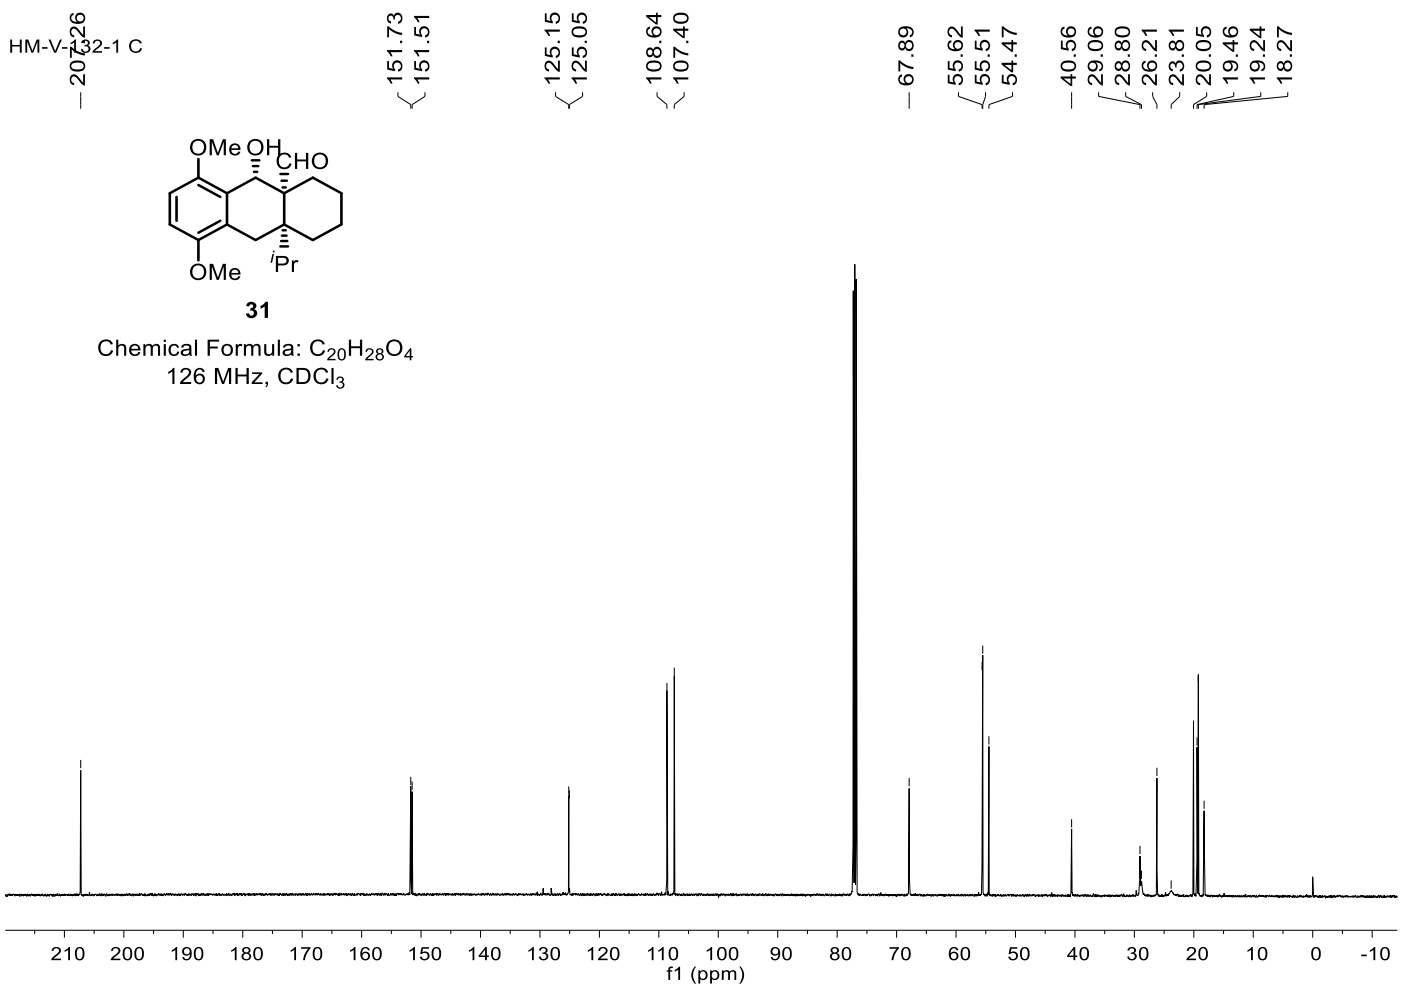

9.83

6.78  
6.76  
6.73  
6.71

5.18  
5.17

3.83  
3.80  
2.82  
2.78  
2.74  
2.70  
2.15  
2.14  
2.13  
2.12  
2.11  
2.10  
1.68  
1.67  
1.65  
1.64  
1.62  
1.62  
1.61  
1.59  
1.47  
1.45  
1.43  
1.42  
1.22

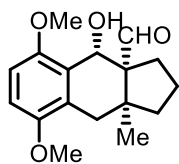

32

Chemical Formula: C<sub>17</sub>H<sub>22</sub>O<sub>4</sub>  
400 MHz, CDCl<sub>3</sub>

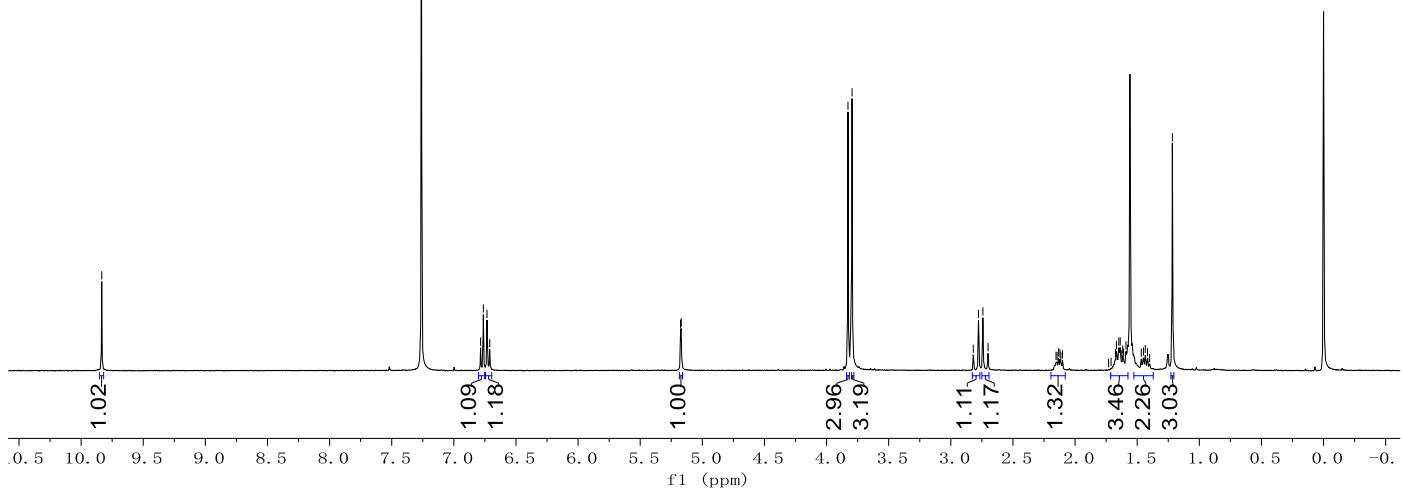

206.29

151.38

126.47

109.95  
108.29

68.41  
61.21  
56.00  
55.97  
43.68  
41.12  
34.35  
31.27  
25.00  
21.49

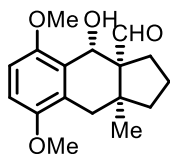

32

Chemical Formula: C<sub>17</sub>H<sub>22</sub>O<sub>4</sub>  
125 MHz, CDCl<sub>3</sub>

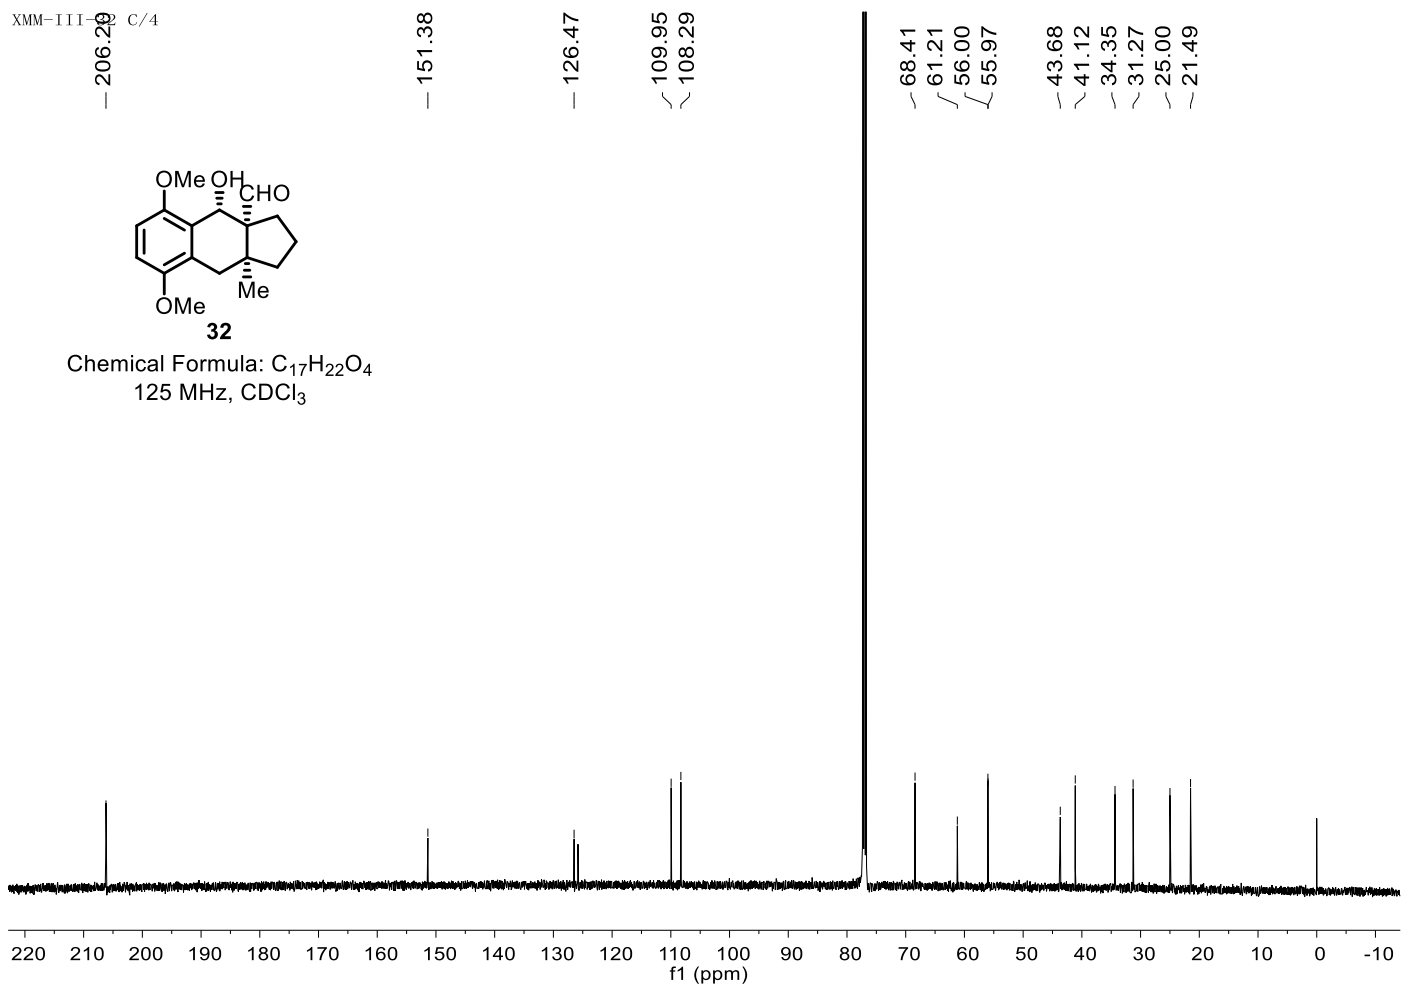

9.0260  
7.2598  
6.7780  
6.7557  
6.7244  
6.7023  
5.2044  
5.1999  
3.8391  
3.8338  
3.8158  
3.7850  
2.9560  
2.9151  
2.6412  
2.6003  
2.0601  
2.0536  
2.0401  
2.0277  
2.0204  
2.0069  
1.7984  
1.7948  
1.7842  
1.7781  
1.7669  
1.7481  
1.6688  
1.6612  
1.6552  
1.5724  
1.5600  
1.5287  
1.5178  
1.5113  
1.5031  
1.4959  
1.4877  
1.4831  
1.4793  
1.4742  
1.4694  
1.4666  
1.4534  
1.4490  
1.4361  
1.4249  
1.4208  
1.4092  
1.3916  
1.3772  
1.3720  
1.3573  
1.3429  
1.3277  
0.8982  
0.8819  
0.8657

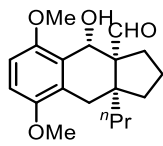

33

Chemical Formula: C<sub>19</sub>H<sub>26</sub>O<sub>4</sub>  
400 MHz, CDCl<sub>3</sub>

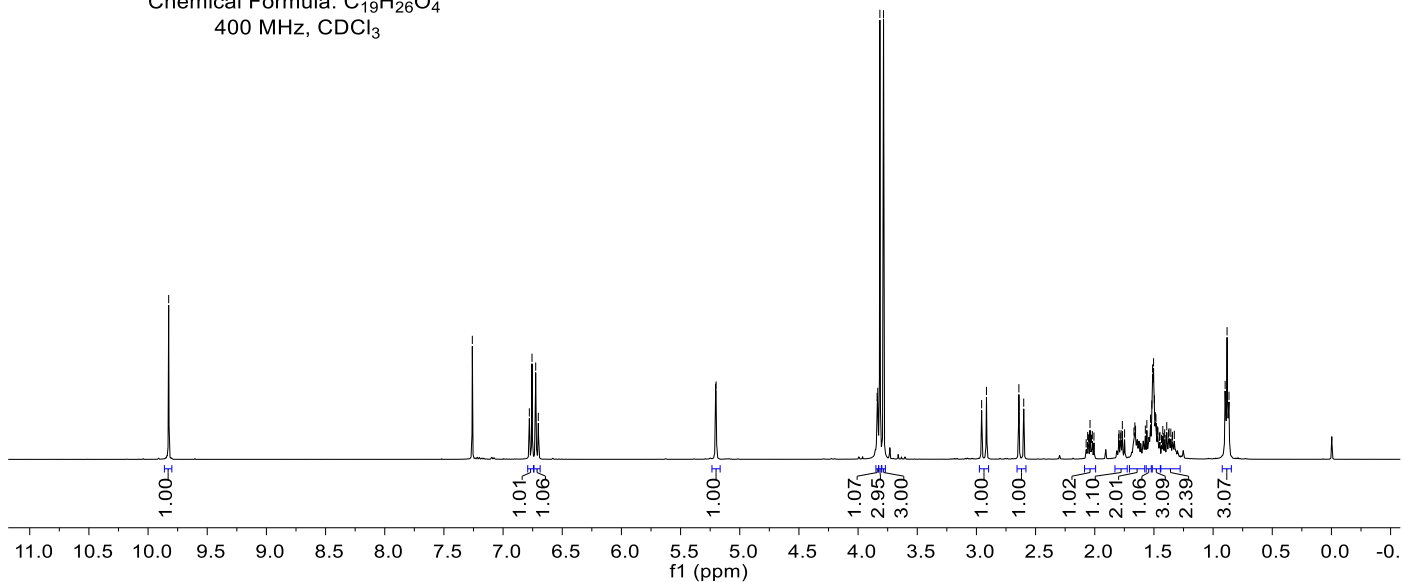

HM-V-124  
C  
206.66

151.48  
151.44

126.94  
125.90

110.23  
108.54

68.25  
68.22  
62.34  
56.20  
56.17  
56.14  
48.06  
40.08  
38.62  
31.62  
30.70  
22.12  
18.52  
15.05

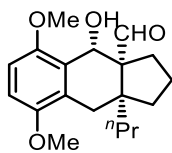

33

Chemical Formula: C<sub>19</sub>H<sub>26</sub>O<sub>4</sub>  
100 MHz, CDCl<sub>3</sub>

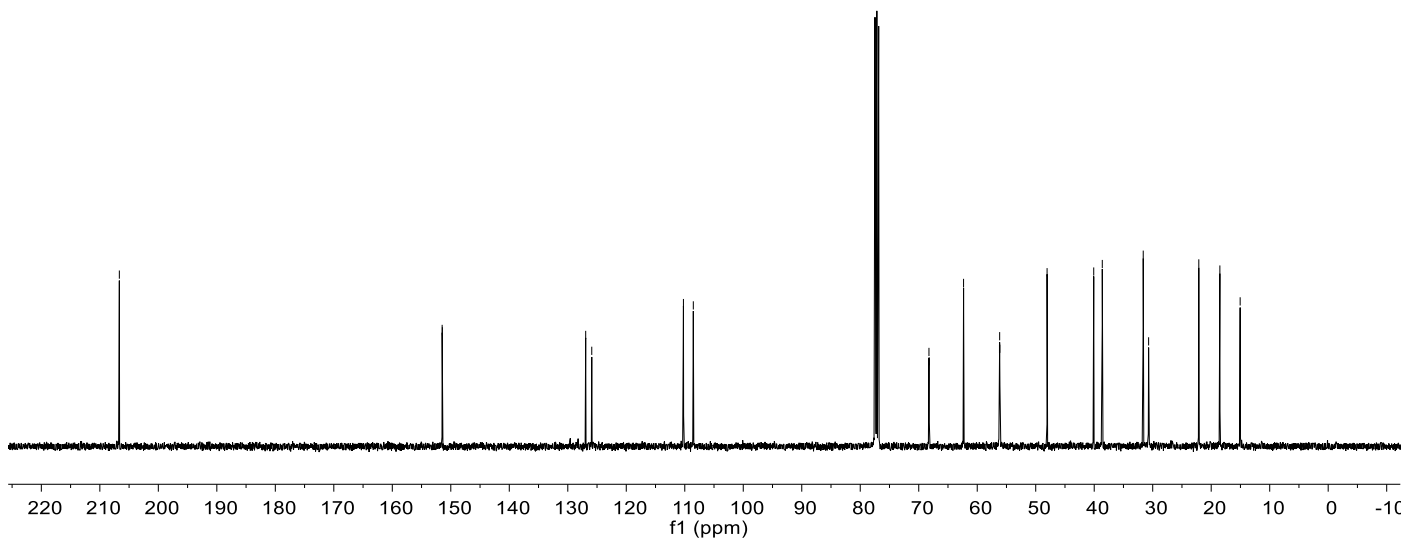

9.98  
6.80  
6.79  
6.73  
6.71  
5.36  
3.83  
3.81  
2.99  
2.96  
2.69  
2.66  
2.18  
2.16  
2.15  
1.99  
1.97  
1.96  
1.96  
1.95  
1.93  
1.91  
1.90  
1.90  
1.88  
1.88  
1.86  
1.65  
1.65  
1.65  
1.64  
1.64  
1.55  
1.55  
1.54  
1.53  
1.53  
1.52  
1.35  
1.35  
1.34  
1.33  
1.33  
1.32  
1.15  
1.14  
1.05  
1.04  
0.98  
0.97

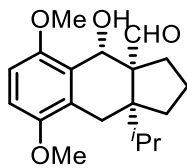

**34**

Chemical Formula: C<sub>19</sub>H<sub>26</sub>O<sub>4</sub>  
500 MHz, CDCl<sub>3</sub>

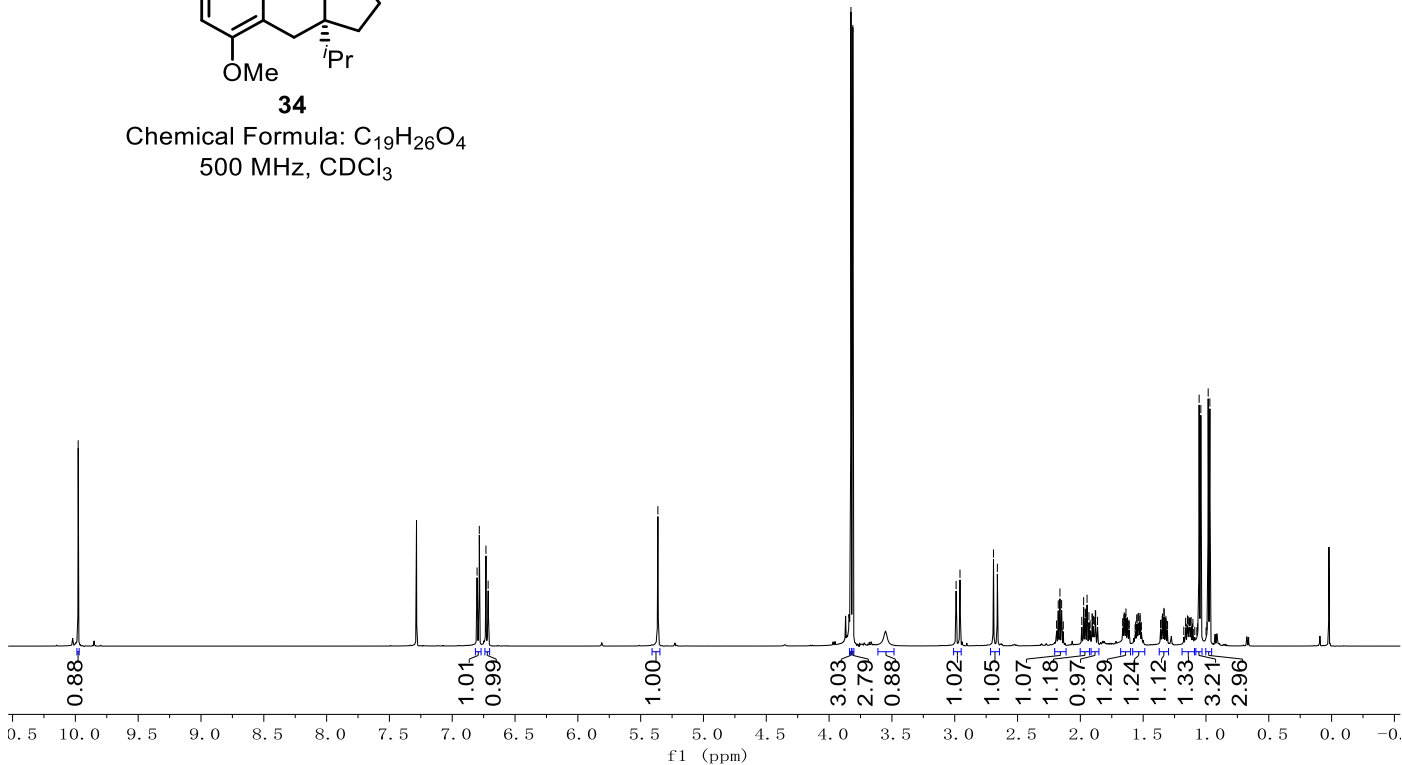

HM-VI-9-C-1 C/5  
HM-VI-9-C-1

207.00  
151.15  
151.12  
128.62  
125.96  
110.64  
108.45  
66.86  
62.10  
56.21  
56.17  
53.09  
41.90  
34.63  
32.74  
26.49  
23.41  
19.67  
19.52

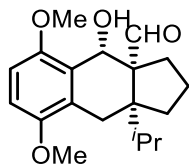

**34**

Chemical Formula: C<sub>19</sub>H<sub>26</sub>O<sub>4</sub>  
125 MHz, CDCl<sub>3</sub>

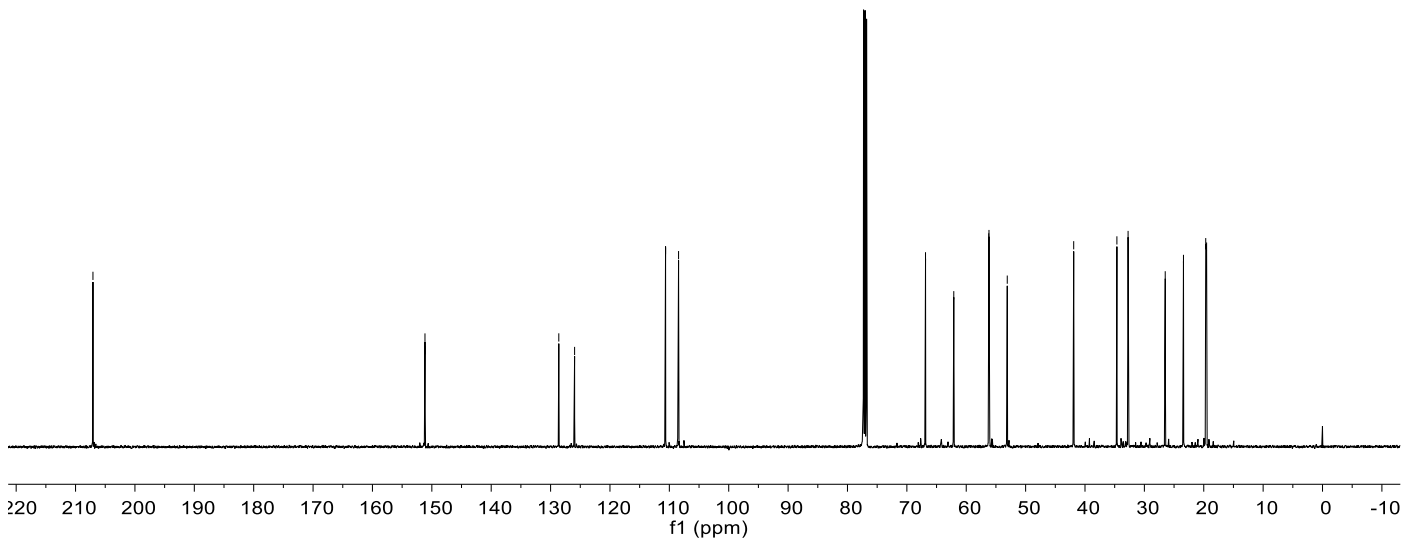

XMM-19-47-02-500/2  
 XMM-19-47-02-500  
 6.78  
 6.75  
 6.74  
 6.74  
 6.74  
 4.98  
 4.59  
 4.35  
 3.86  
 3.81  
 2.83  
 2.79  
 2.73  
 2.69  
 2.51  
 2.50  
 2.49  
 2.49  
 2.48  
 2.47  
 2.14  
 2.01  
 2.00  
 1.99  
 1.98  
 1.97  
 1.96  
 1.95  
 1.79  
 1.79  
 1.78  
 1.78  
 1.77  
 1.77  
 1.76  
 1.67  
 1.66  
 1.66  
 1.65  
 1.65  
 1.64  
 1.64  
 1.62  
 1.62  
 1.61  
 1.60  
 1.59  
 1.59  
 1.58  
 1.27  
 1.05

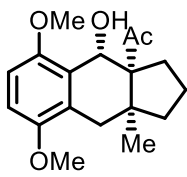

35

Chemical Formula: C<sub>18</sub>H<sub>24</sub>O<sub>4</sub>  
 500 MHz, CDCl<sub>3</sub>

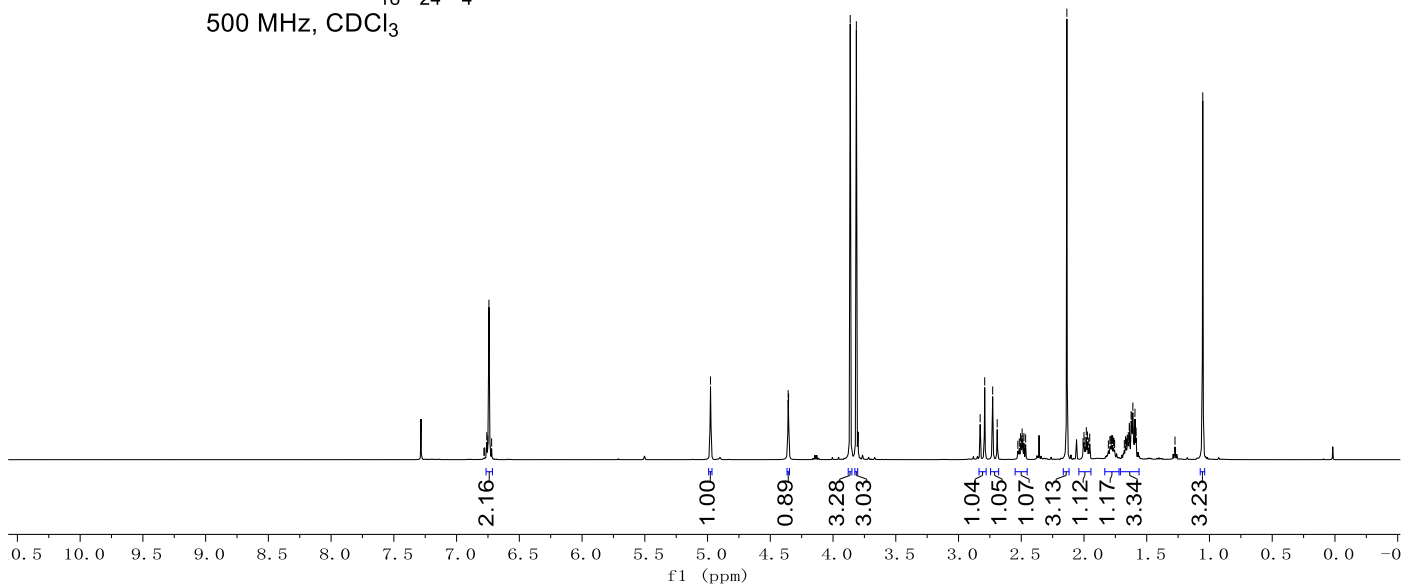

XMM-19-47-02-500/2  
 XMM-19-47-02-500

210.89  
 151.61  
 151.29  
 126.32  
 125.77  
 108.69  
 107.73  
 70.68  
 63.26  
 55.67  
 55.64  
 42.85  
 38.94  
 33.36  
 31.92  
 29.75  
 24.77  
 18.95

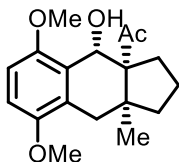

35

Chemical Formula: C<sub>18</sub>H<sub>24</sub>O<sub>4</sub>  
 125 MHz, CDCl<sub>3</sub>

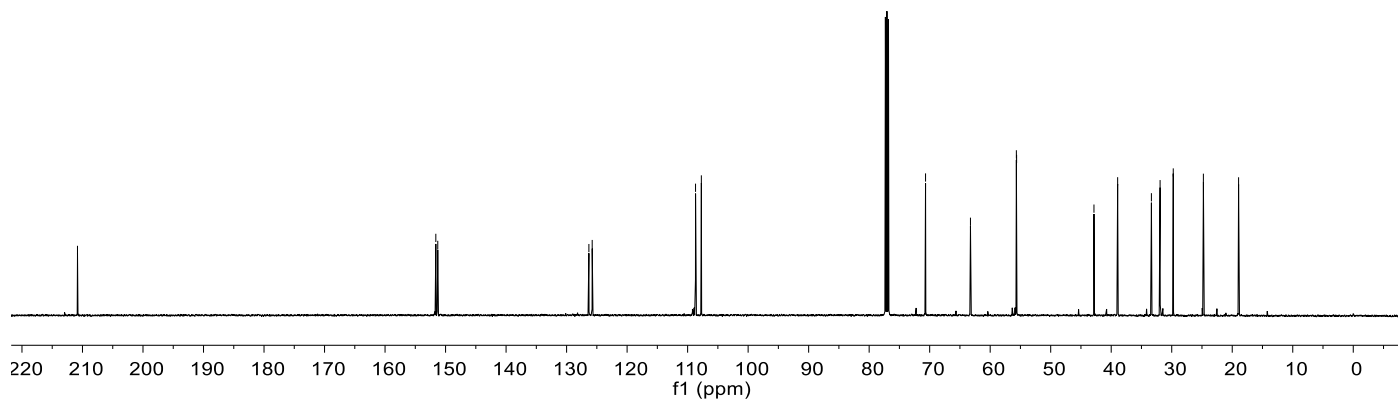



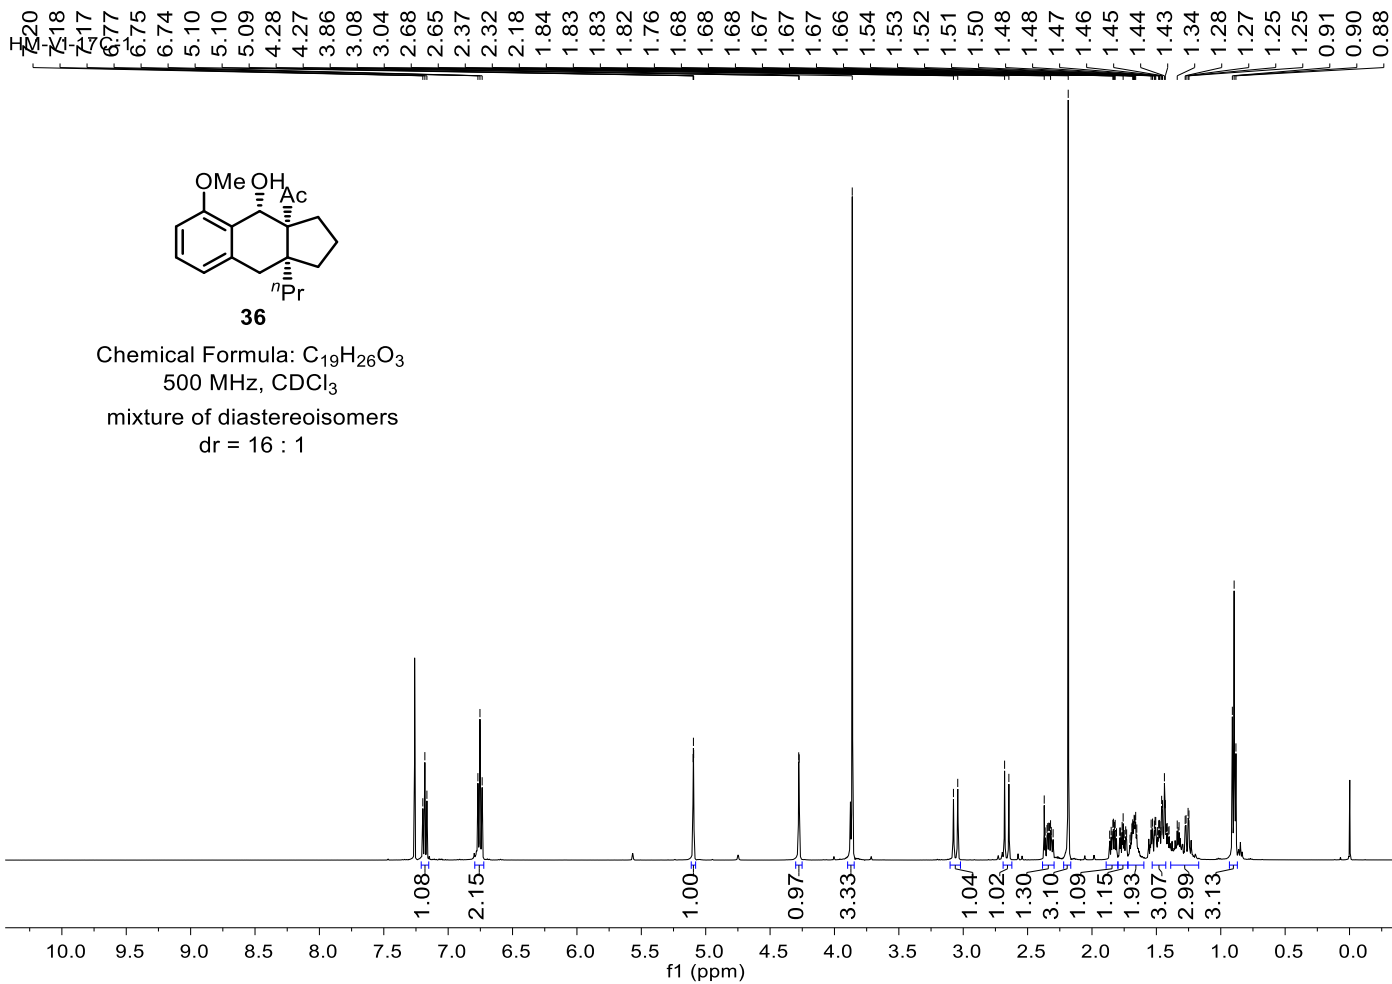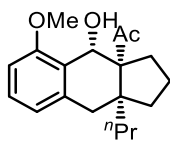

**36**

Chemical Formula: C<sub>19</sub>H<sub>26</sub>O<sub>3</sub>

500 MHz, CDCl<sub>3</sub>

mixture of diastereoisomers

dr = 16 : 1

HM-2175

-17C-1 C

-157.38

-137.90

~128.31

~124.89

~121.54

-108.10

-70.29

-64.69

~55.48

~47.61

~39.37

~37.61

~35.96

~32.64

~30.23

~20.48

~17.61

~15.02

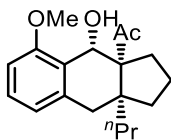

**36**

Chemical Formula: C<sub>19</sub>H<sub>26</sub>O<sub>3</sub>

125 MHz, CDCl<sub>3</sub>

mixture of diastereoisomers

dr = 16 : 1

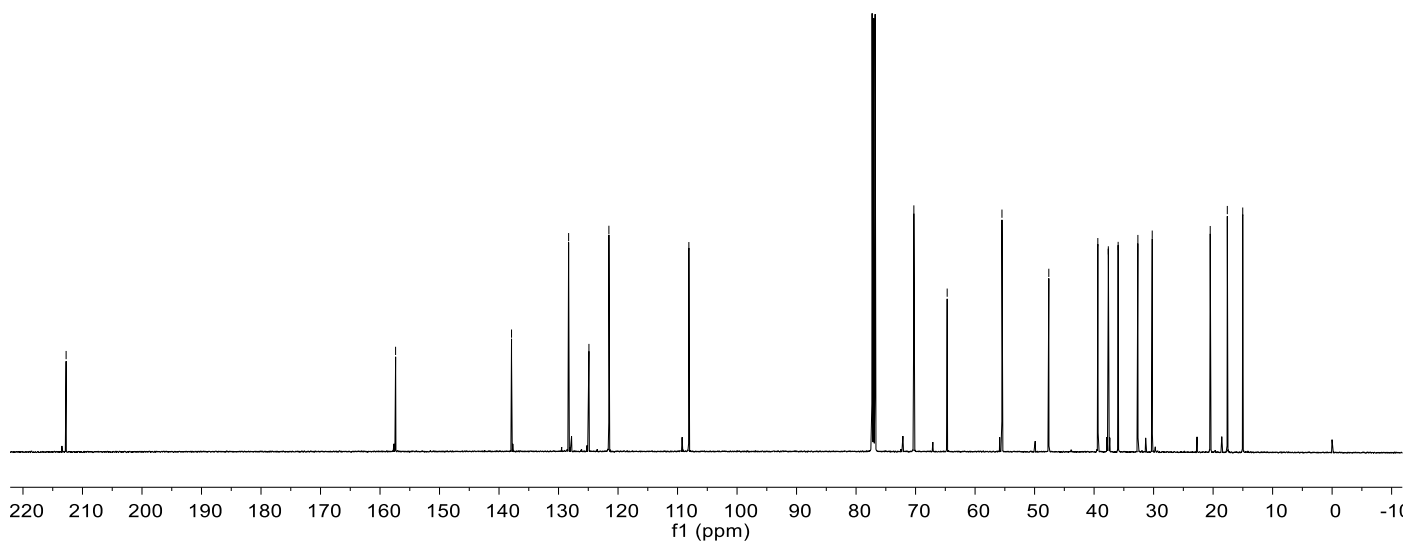

6.73  
6.72  
6.71  
6.68  
6.70  
4.99  
4.33  
4.30  
3.84  
3.79  
2.81  
2.78  
2.71  
2.68  
2.44  
2.43  
2.42  
2.42  
2.13  
1.90  
1.90  
1.84  
1.83  
1.82  
1.81  
1.80  
1.63  
1.59  
1.49  
1.48  
1.48  
1.48  
1.47  
1.47  
1.46  
1.46  
1.46  
1.45  
1.45  
1.44  
1.44  
1.44  
1.43  
1.36  
1.34  
1.16  
1.15  
1.14  
1.13  
1.13  
0.91  
0.90  
0.89

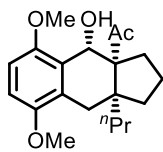

37

Chemical Formula: C<sub>20</sub>H<sub>28</sub>O<sub>4</sub>  
500 MHz, CDCl<sub>3</sub>

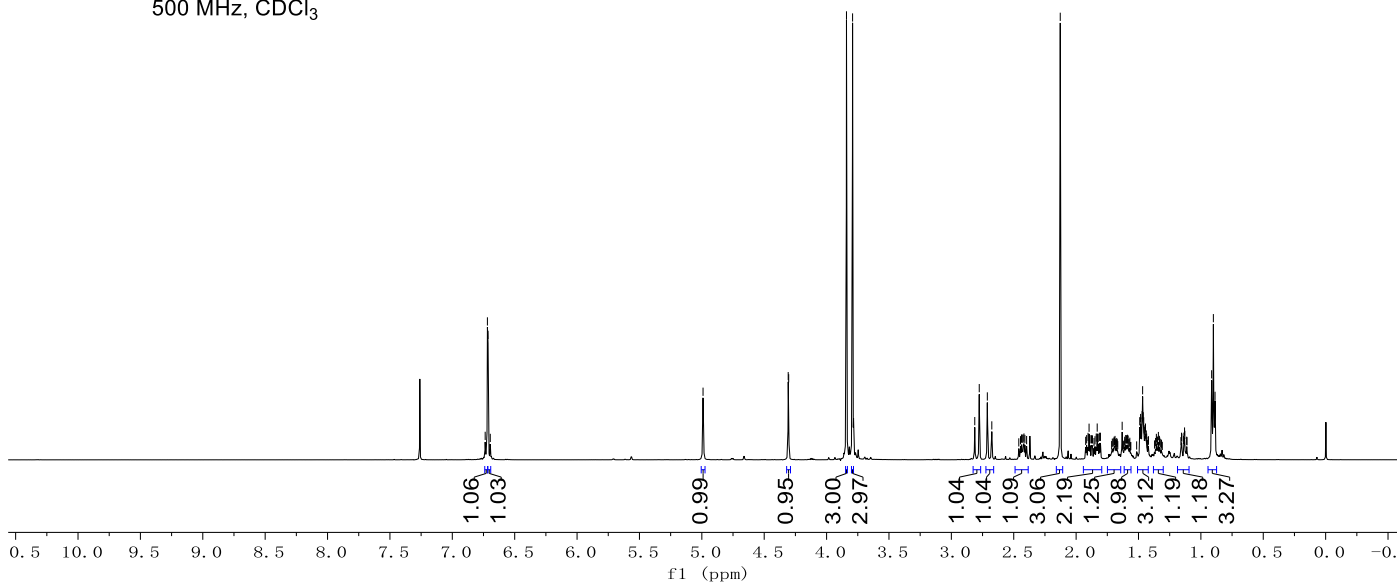

XMM-I-148-02-500-HC/2  
XMM-I-148-02

211.25  
151.48  
151.33  
126.09  
125.90  
108.70  
107.64  
70.58  
64.10  
55.65  
55.62  
46.16  
38.52  
34.58  
31.90  
30.33  
29.93  
19.24  
17.27  
14.97

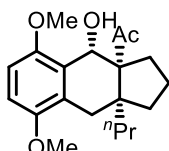

37

Chemical Formula: C<sub>20</sub>H<sub>28</sub>O<sub>4</sub>  
125 MHz, CDCl<sub>3</sub>

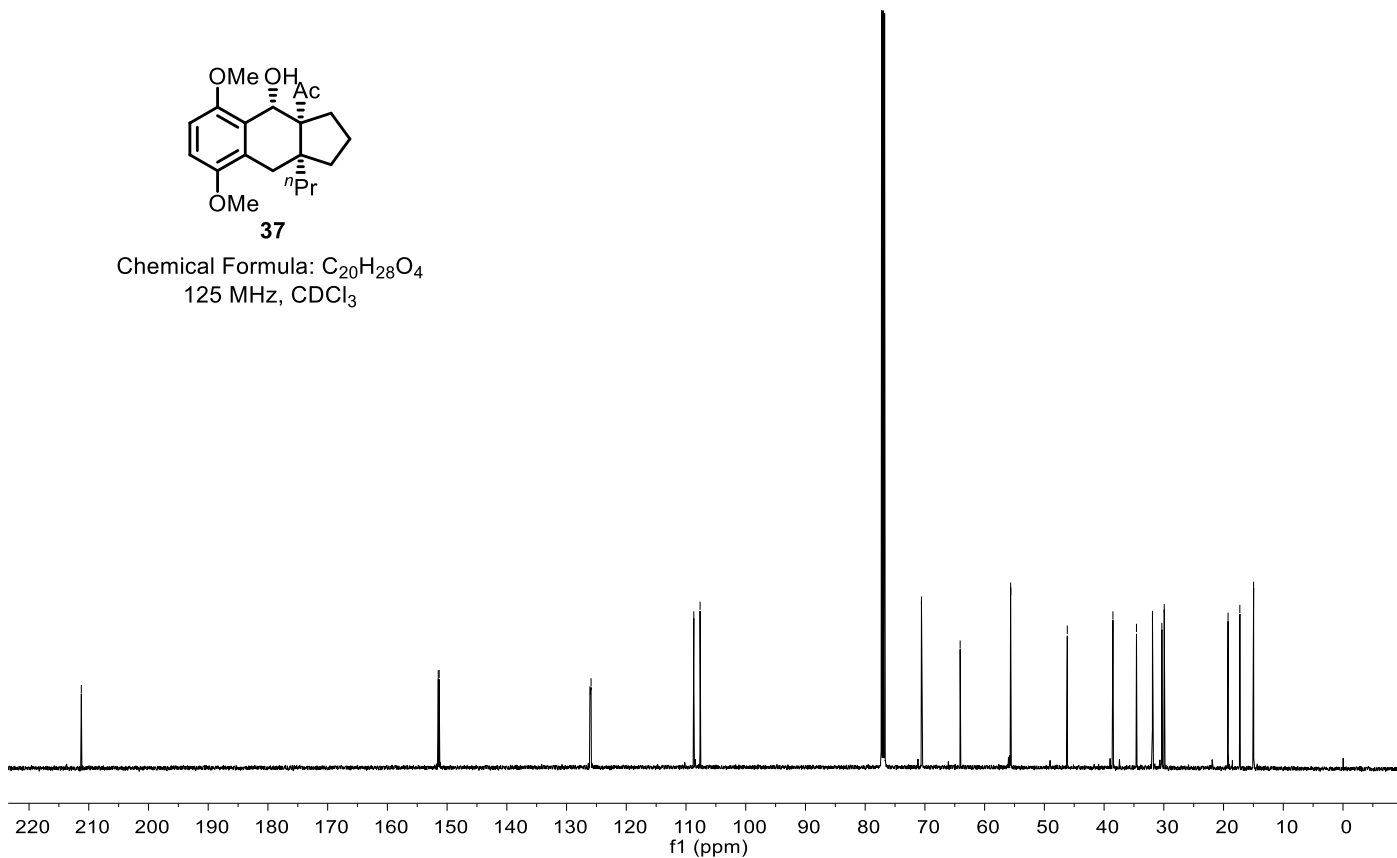

6.73  
6.71  
6.70  
6.68  
4.93  
4.32  
4.31  
3.83  
3.79  
2.74  
2.74  
2.50  
2.50  
2.49  
2.48  
2.47  
2.47  
2.47  
2.46  
2.45  
2.45  
2.45  
2.43  
2.42  
2.41  
2.41  
2.39  
2.37  
2.03  
2.02  
2.01  
2.00  
1.99  
1.58  
1.58  
1.57  
1.57  
1.56  
1.56  
1.55  
1.55  
1.54  
1.25  
1.25  
1.21  
1.02  
0.87  
0.86

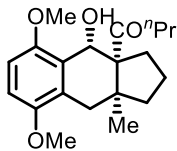

38

Chemical Formula: C<sub>20</sub>H<sub>28</sub>O<sub>4</sub>  
500 MHz, CDCl<sub>3</sub>

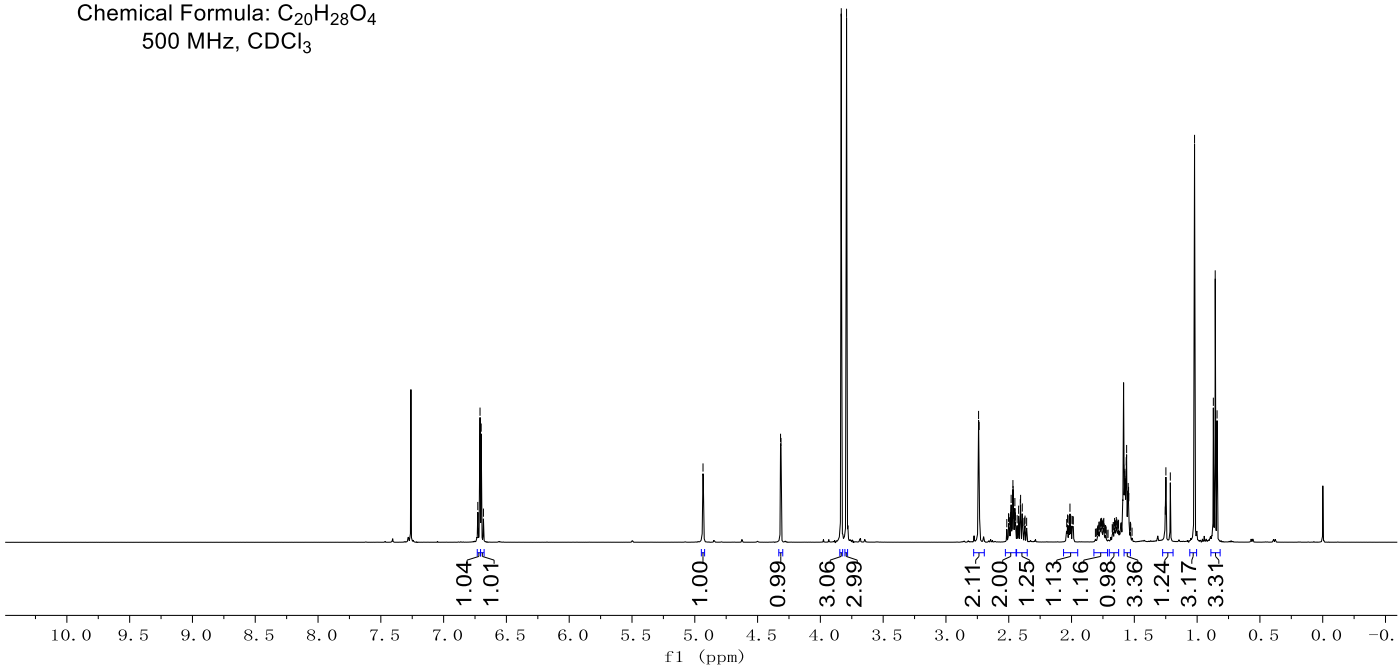

HM V-38A-1 C/3  
HM V-38A-1 C

-21.90

151.54  
151.28  
126.33  
126.05  
108.64  
107.56  
70.96  
62.59  
55.68  
55.57  
43.85  
43.10  
38.70  
33.36  
31.78  
24.67  
19.06  
16.98  
13.88

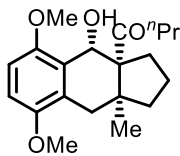

38

Chemical Formula: C<sub>20</sub>H<sub>28</sub>O<sub>4</sub>  
125 MHz, CDCl<sub>3</sub>

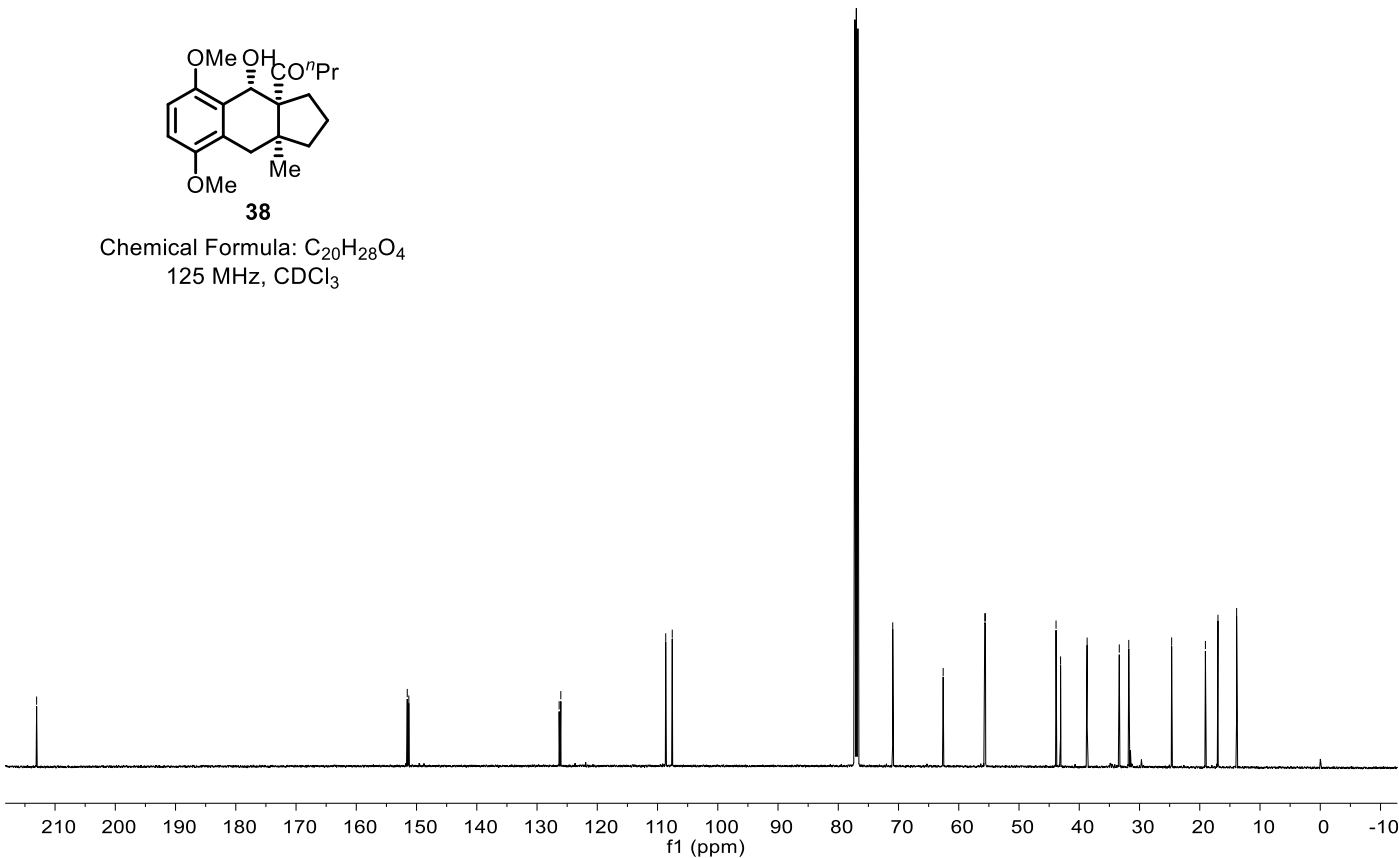

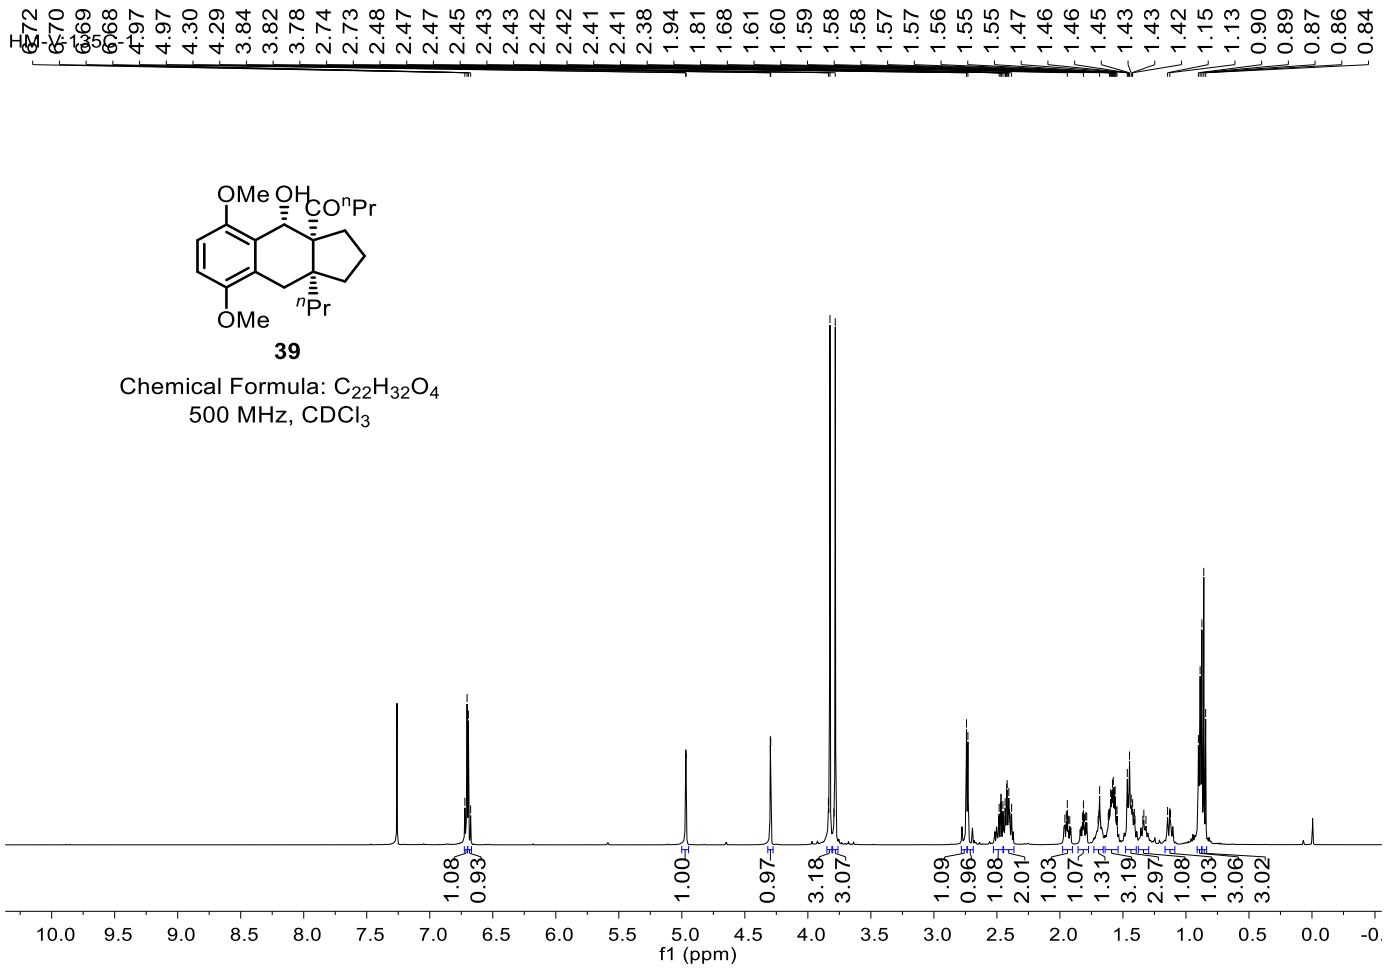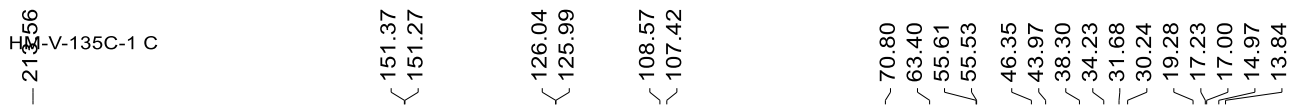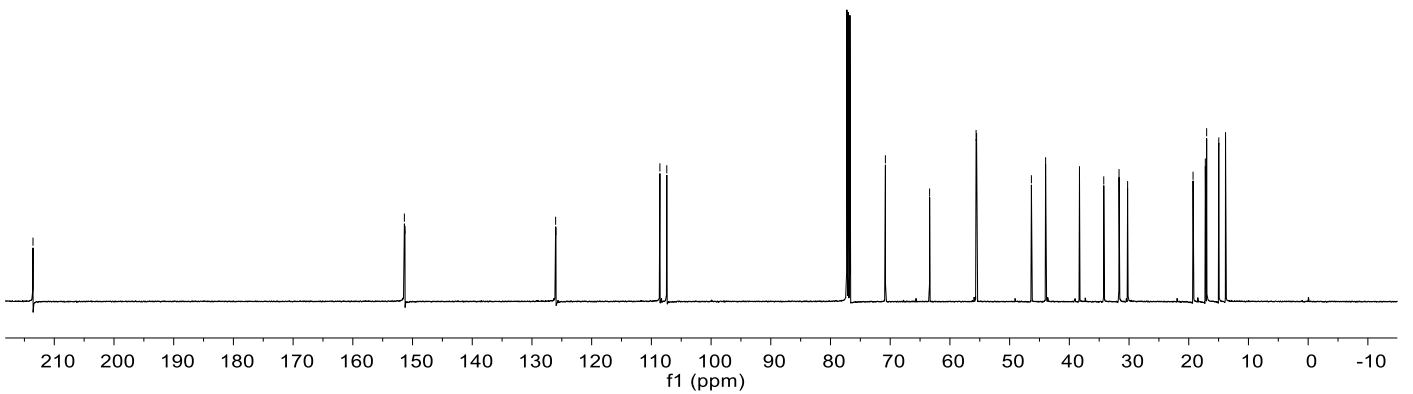

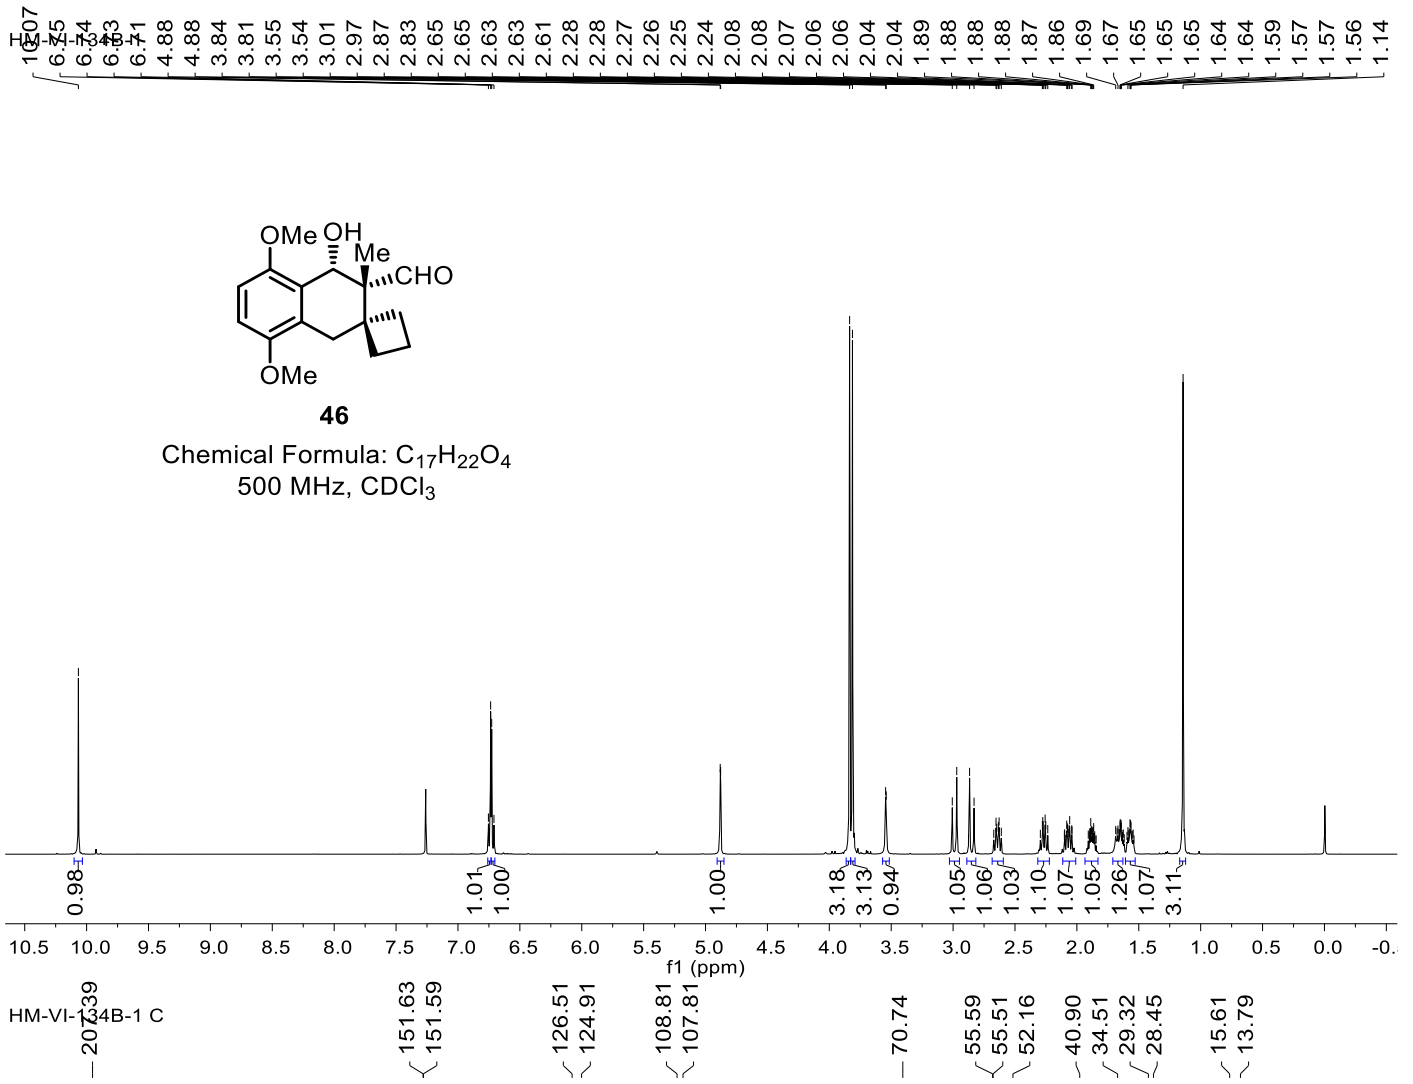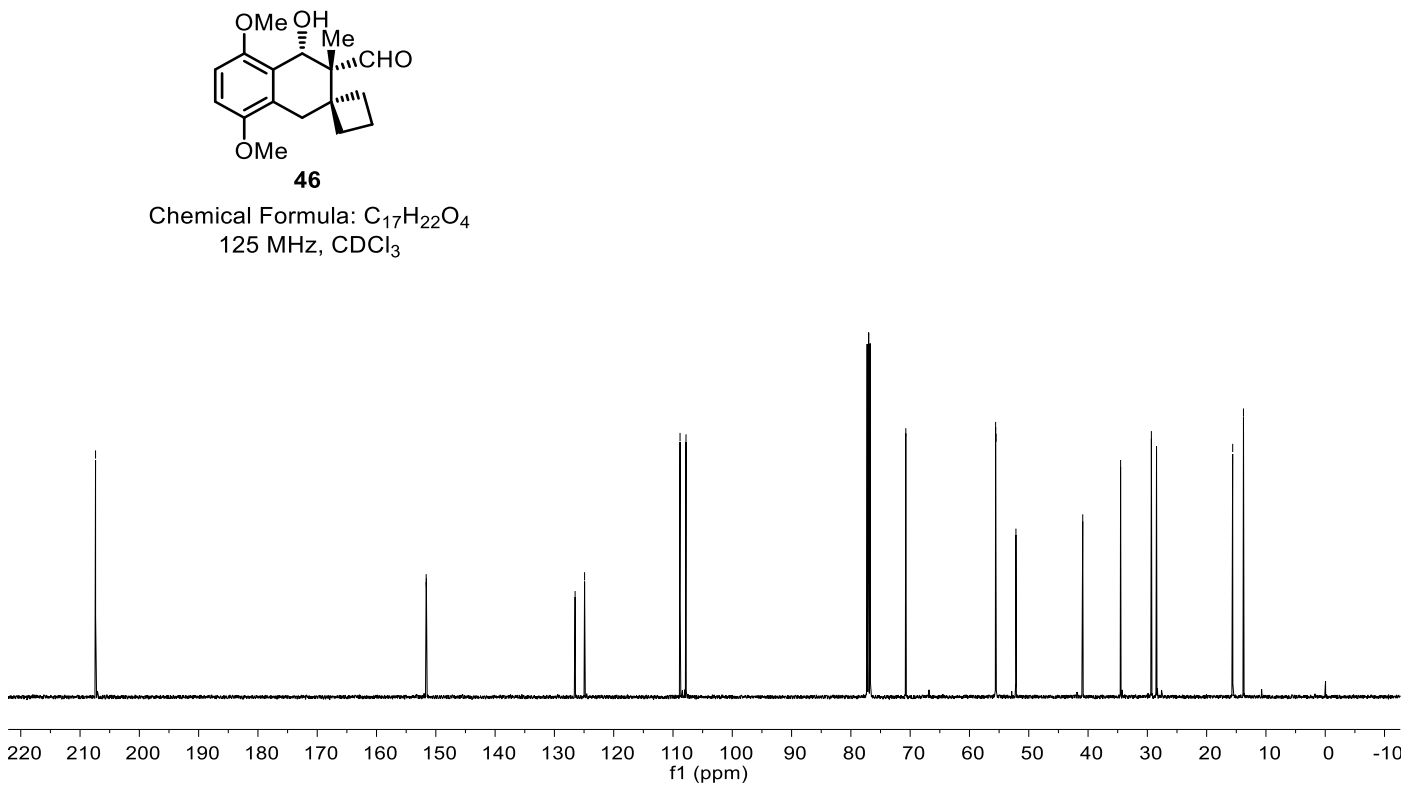

HM-VI-126B  
 6.74  
 6.72  
 6.71  
 6.70  
 4.94  
 4.94  
 3.84  
 3.84  
 3.81  
 3.81  
 3.32  
 3.32  
 2.98  
 2.95  
 2.75  
 2.73  
 2.71  
 2.70  
 2.69  
 2.69  
 2.68  
 2.68  
 2.67  
 2.66  
 2.59  
 2.58  
 2.57  
 2.57  
 2.56  
 2.55  
 2.55  
 2.53  
 2.25  
 2.25  
 2.25  
 1.52  
 1.52  
 1.51  
 1.50  
 1.50  
 1.49  
 1.49  
 1.48  
 1.48  
 1.47  
 1.47  
 1.47  
 1.18

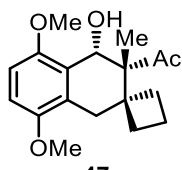

47

Chemical Formula: C<sub>18</sub>H<sub>24</sub>O<sub>4</sub>  
 500 MHz, CDCl<sub>3</sub>

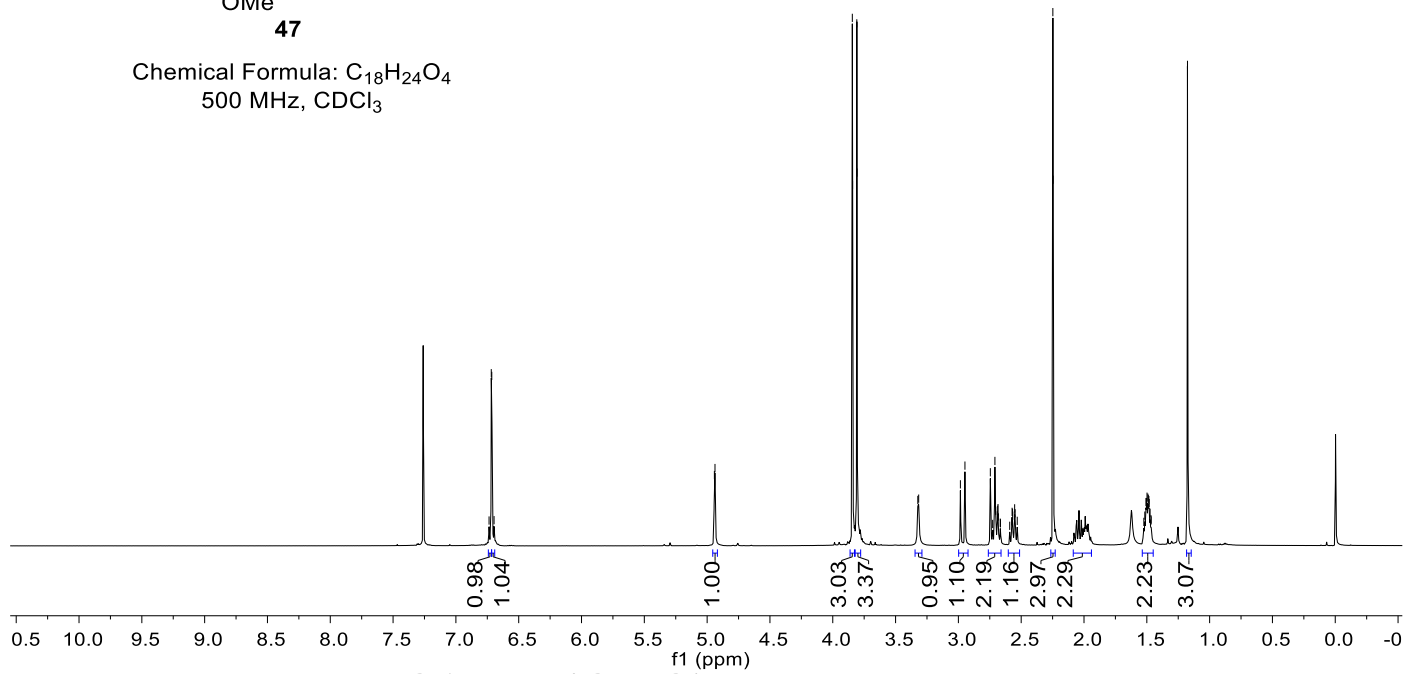

HM-VI-126B-1 C  
 21.45  
 151.60  
 151.54  
 126.83  
 125.20  
 108.70  
 107.77  
 70.75  
 55.62  
 55.58  
 54.79  
 40.62  
 35.39  
 29.29  
 29.03  
 28.12  
 16.53  
 15.27

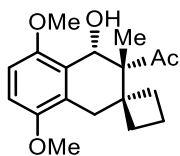

47

Chemical Formula: C<sub>18</sub>H<sub>24</sub>O<sub>4</sub>  
 125 MHz, CDCl<sub>3</sub>

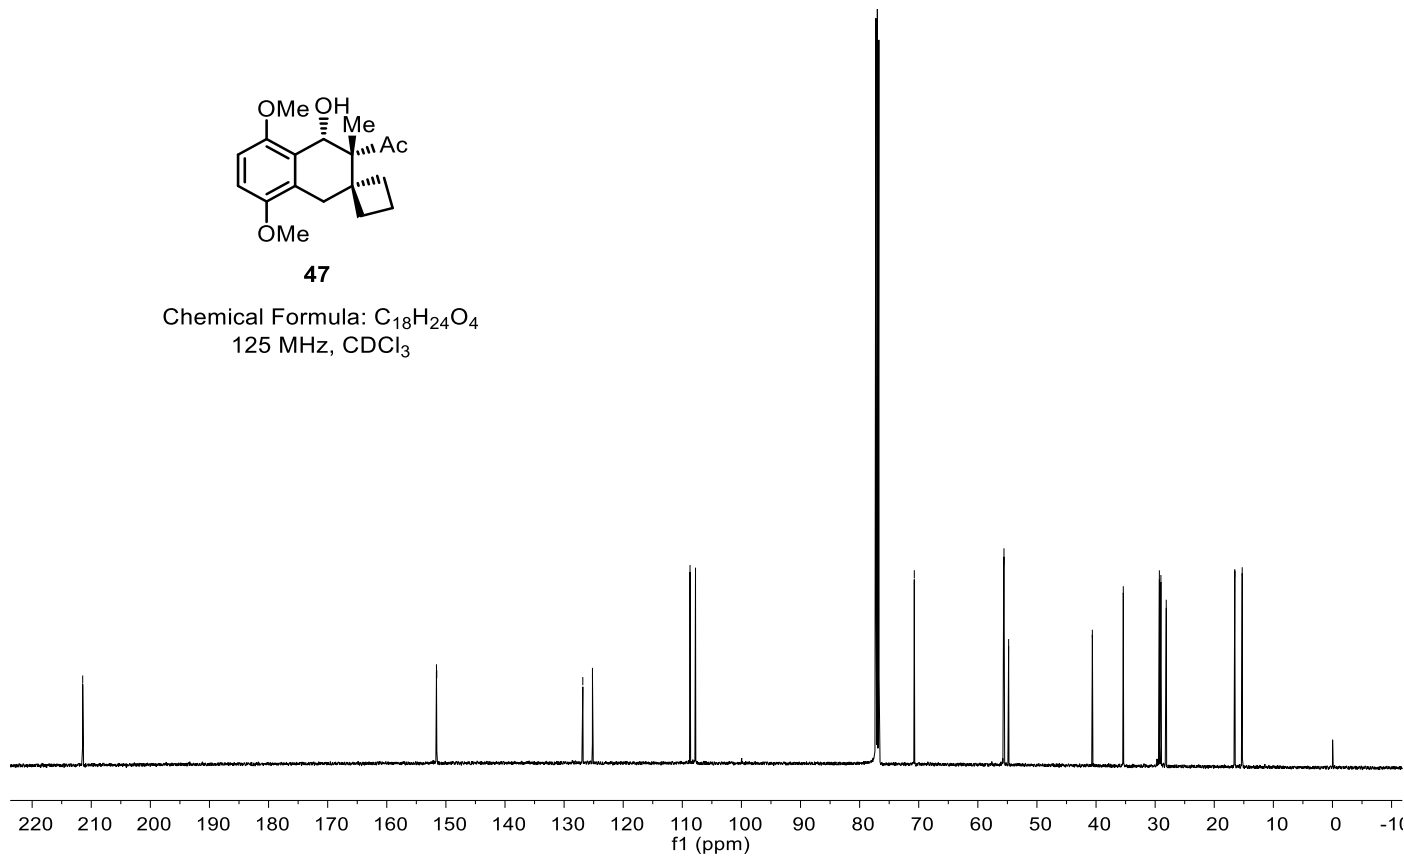

8.91  
 6.73  
 4.88  
 3.87  
 3.92  
 3.91  
 3.85  
 3.78  
 2.68  
 2.64  
 2.59  
 2.54  
 2.10  
 2.08  
 2.07  
 2.06  
 2.06  
 2.04  
 2.04  
 2.02  
 2.02  
 1.71  
 1.71  
 1.69  
 1.69  
 1.69  
 1.67  
 1.67  
 1.65  
 1.64  
 1.64  
 1.63  
 1.62  
 1.62  
 1.61  
 1.60  
 1.60  
 1.59  
 1.59  
 1.36  
 1.34  
 1.33  
 1.32  
 1.31  
 1.30  
 1.30  
 1.29  
 1.28  
 1.28  
 1.26  
 1.26  
 1.25  
 1.20

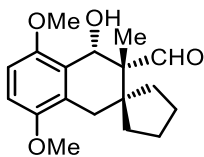

48

Chemical Formula: C<sub>18</sub>H<sub>24</sub>O<sub>4</sub>  
 400 MHz, CDCl<sub>3</sub>

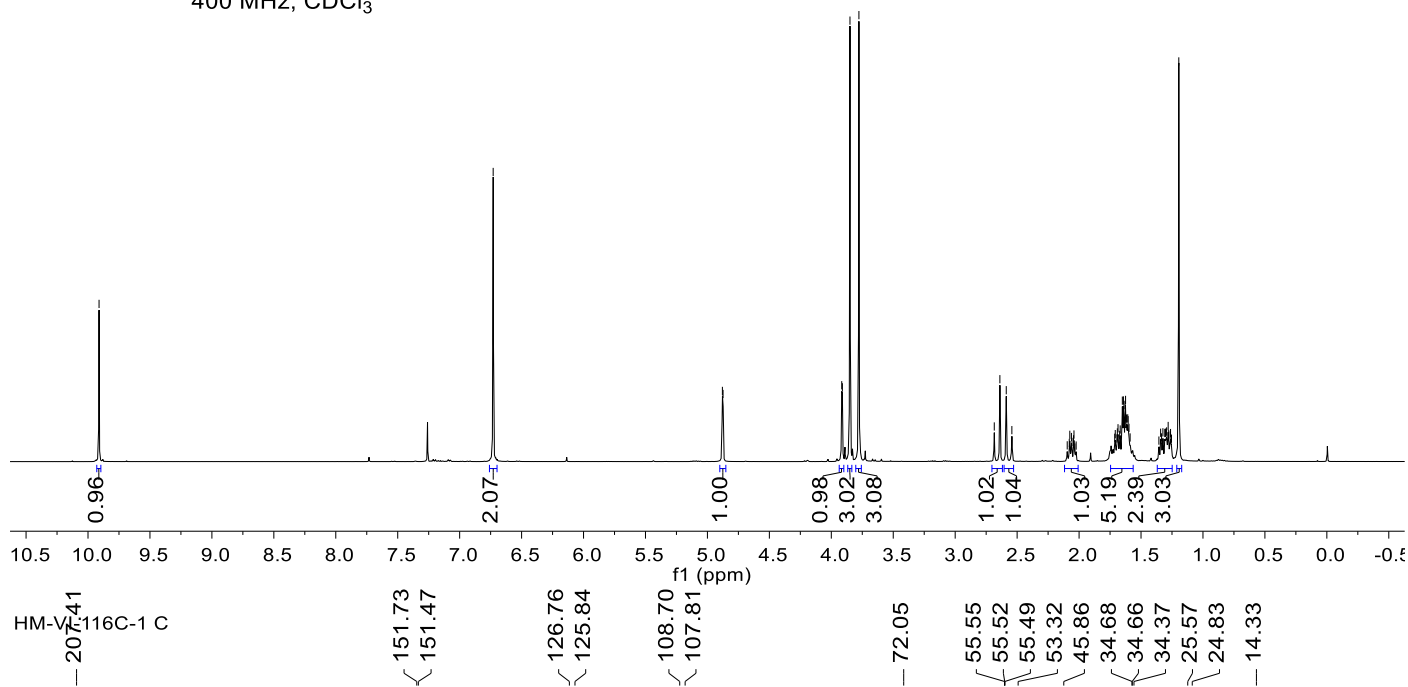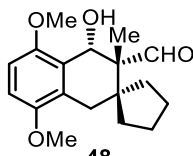

48

Chemical Formula: C<sub>18</sub>H<sub>24</sub>O<sub>4</sub>  
 100 MHz, CDCl<sub>3</sub>

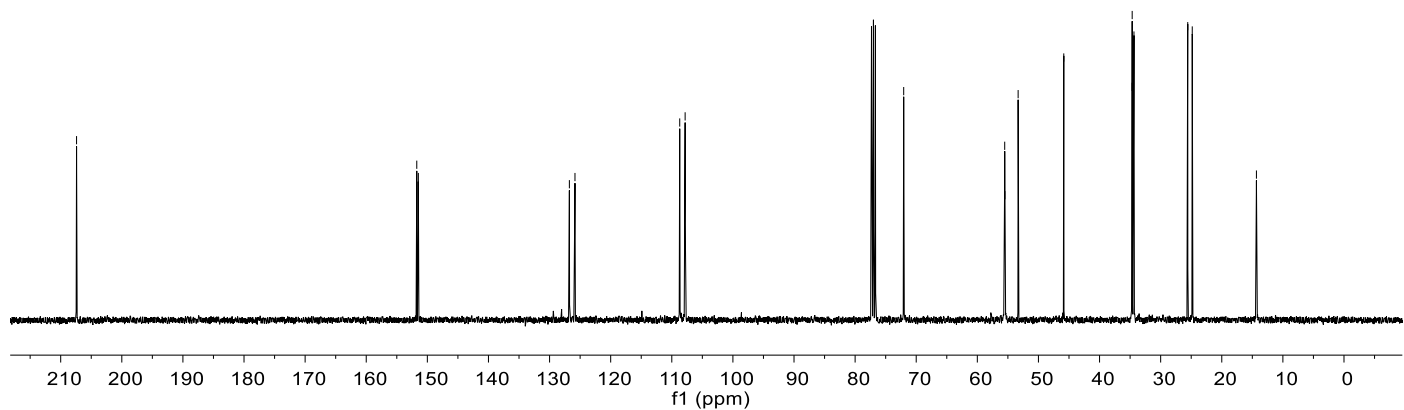

6.71  
 5.00  
 4.99  
 3.86  
 3.78  
 3.24  
 3.23  
 2.72  
 2.68  
 2.42  
 2.42  
 2.38  
 2.37  
 2.26  
 2.12  
 2.11  
 2.10  
 2.09  
 2.08  
 2.05  
 2.03  
 2.02  
 2.02  
 1.79  
 1.79  
 1.78  
 1.78  
 1.77  
 1.76  
 1.75  
 1.74  
 1.74  
 1.73  
 1.71  
 1.71  
 1.70  
 1.70  
 1.69  
 1.68  
 1.67  
 1.66  
 1.65  
 1.64  
 1.64  
 1.28  
 1.27  
 1.27  
 1.26  
 1.25  
 1.23

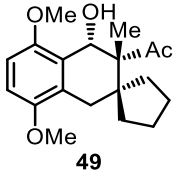

Chemical Formula: C<sub>19</sub>H<sub>26</sub>O<sub>4</sub>  
 400 MHz, CDCl<sub>3</sub>

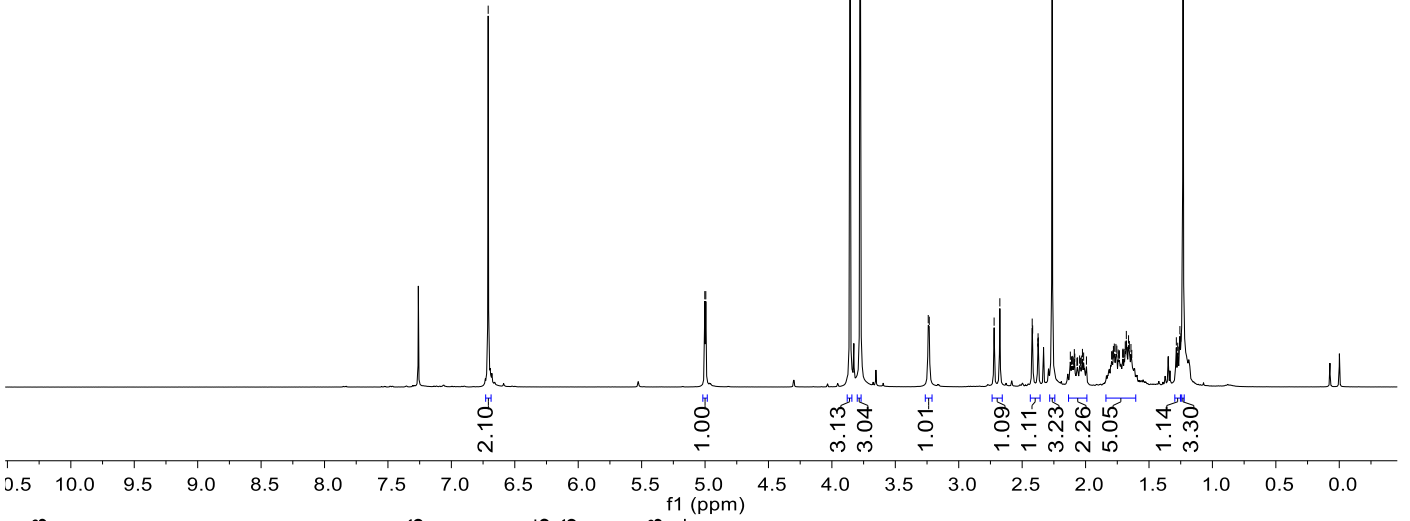

216.88  
 151.71  
 151.36  
 126.65  
 126.26  
 108.63  
 107.34  
 71.56  
 55.76  
 55.59  
 55.49  
 45.16  
 36.29  
 35.62  
 34.19  
 28.15  
 25.99  
 24.97  
 18.58

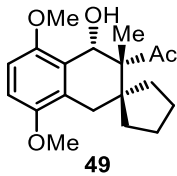

Chemical Formula: C<sub>19</sub>H<sub>26</sub>O<sub>4</sub>  
 125 MHz, CDCl<sub>3</sub>

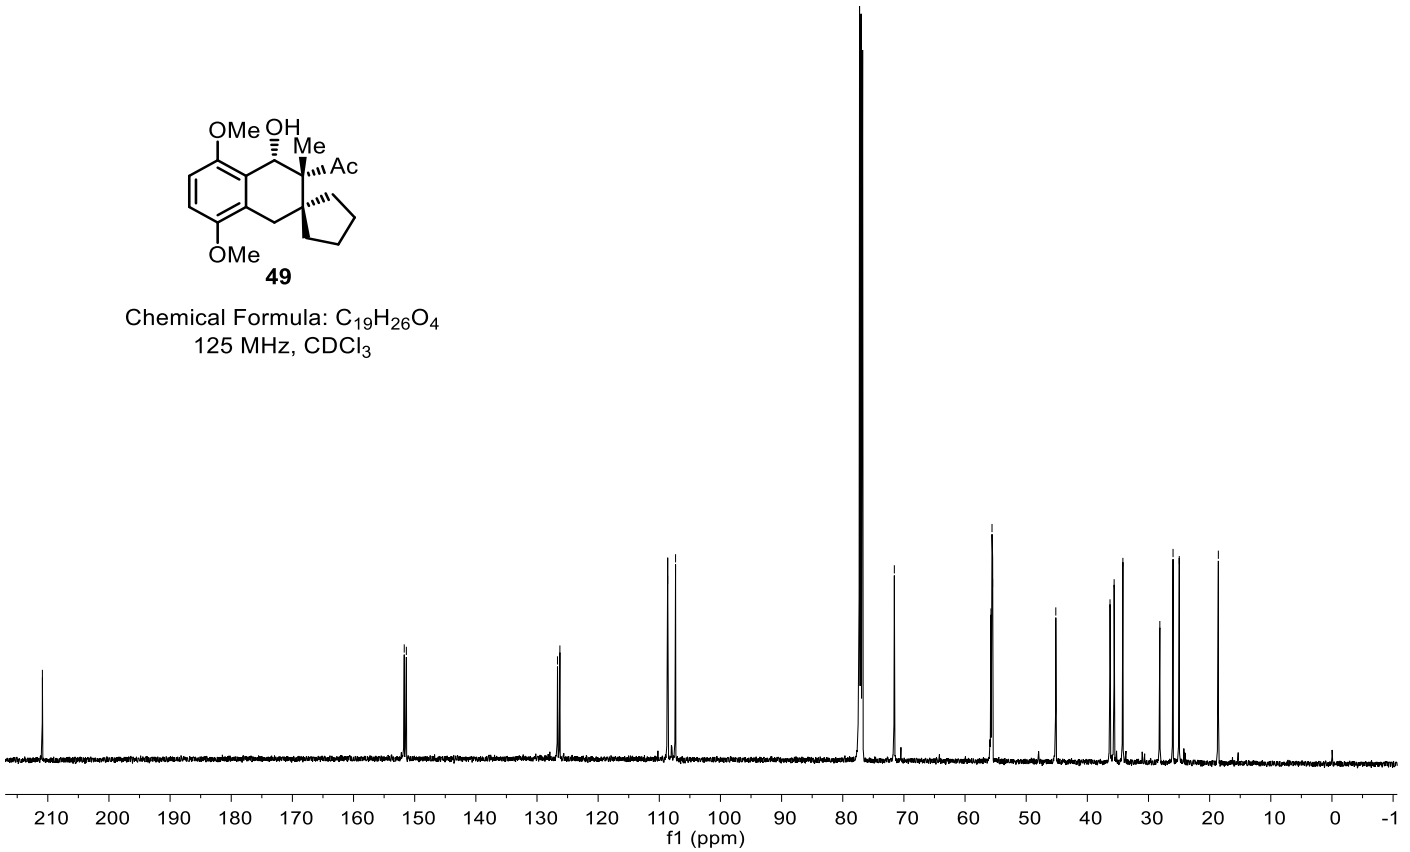



9.84  
6.78  
6.76  
6.75  
6.73  
4.86  
4.15  
4.15  
3.86  
3.81  
3.29  
3.24  
2.37  
2.32  
1.69  
1.68  
1.67  
1.66  
1.65  
1.65  
1.64  
1.61  
1.56  
1.55  
1.55  
1.54  
1.53  
1.52  
1.43  
1.43  
1.42  
1.41  
1.40  
1.39  
1.38  
1.38  
1.37  
1.36  
1.36  
1.35  
1.34  
1.26  
1.17  
1.16  
1.15  
1.13  
1.11  
1.10

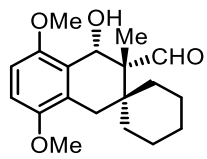

**50**

Chemical Formula: C<sub>19</sub>H<sub>26</sub>O<sub>4</sub>  
400 MHz, CDCl<sub>3</sub>

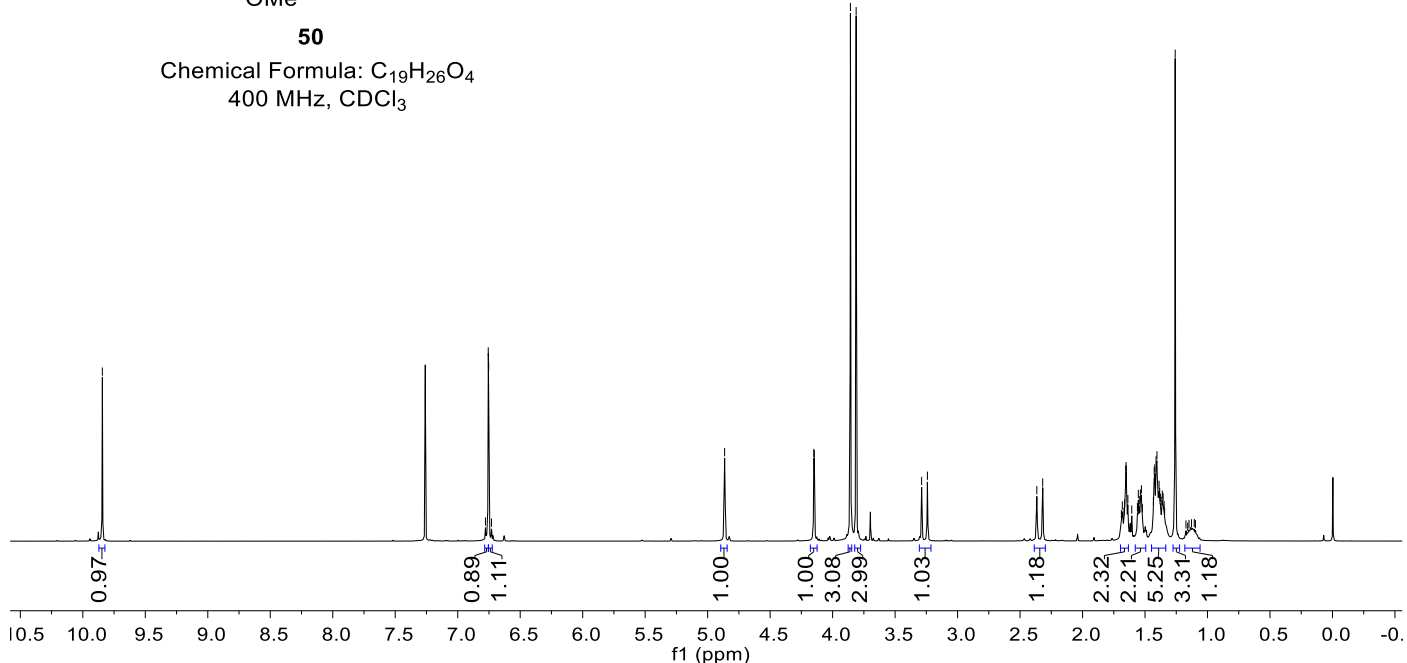

HM-VI-133  
207.33  
151.66  
151.54  
126.31  
125.31  
108.86  
107.85  
71.66  
55.69  
55.54  
54.87  
37.91  
32.05  
28.75  
27.94  
26.01  
21.10  
21.01  
12.19

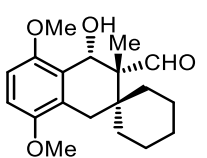

**50**

Chemical Formula: C<sub>19</sub>H<sub>26</sub>O<sub>4</sub>  
125 MHz, CDCl<sub>3</sub>

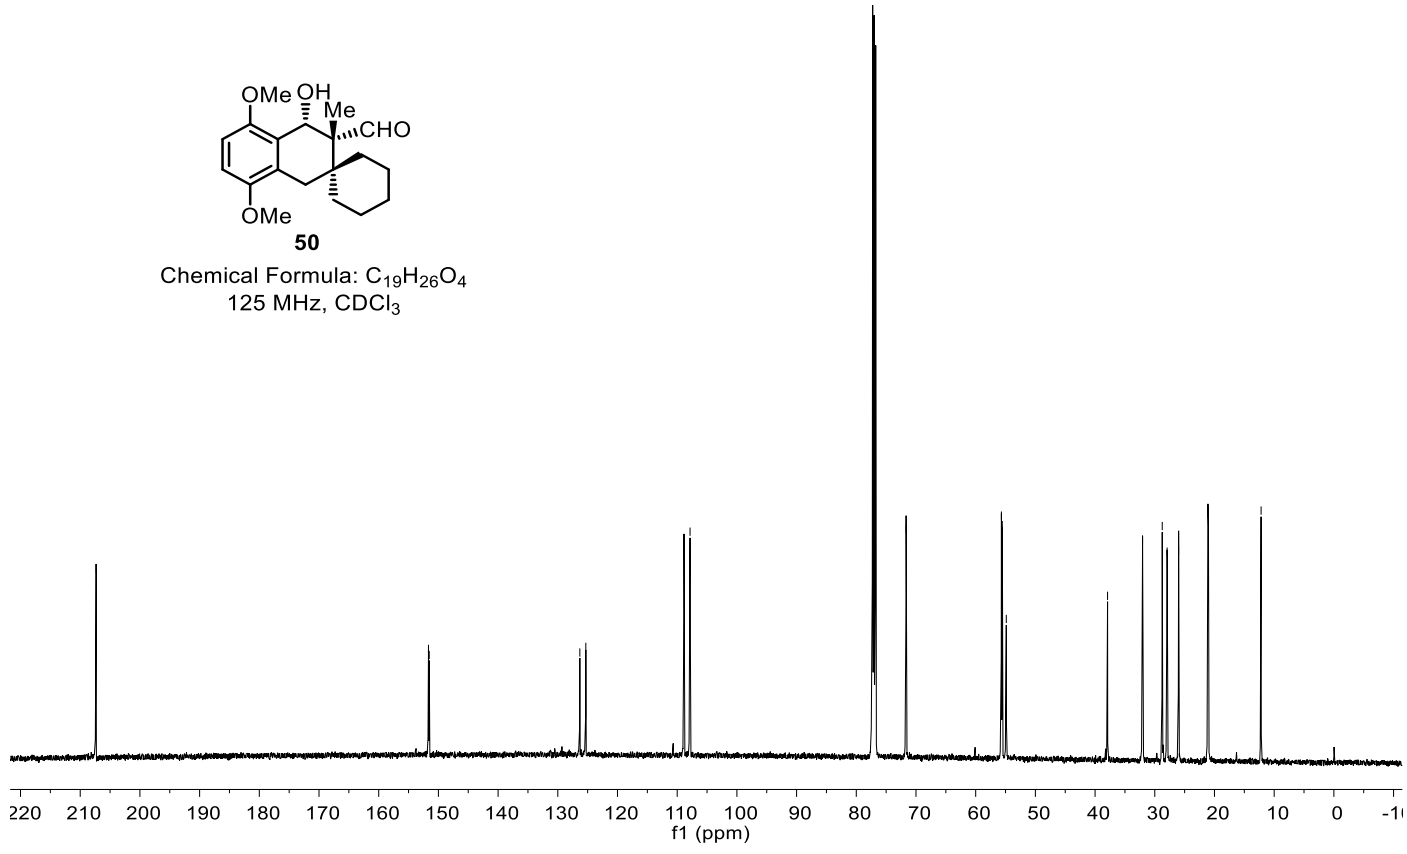

HM-VI-133B-1

6.74  
6.73  
6.72  
6.70  
4.90  
4.90  
3.99  
3.99  
3.84  
3.80  
3.01  
2.97  
2.56  
2.52  
2.16  
1.80  
1.79  
1.78  
1.77  
1.76  
1.67  
1.53  
1.52  
1.51  
1.46  
1.46  
1.45  
1.44  
1.44  
1.38  
1.34  
1.34  
1.27  
1.26  
1.25  
1.20  
1.18  
1.17  
1.17  
1.16  
1.15  
1.14

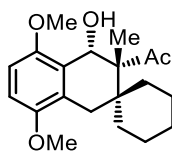

**51**

Chemical Formula: C<sub>20</sub>H<sub>28</sub>O<sub>4</sub>

500 MHz, CDCl<sub>3</sub>

mixture of diastereoisomers

dr = 5.2 : 1

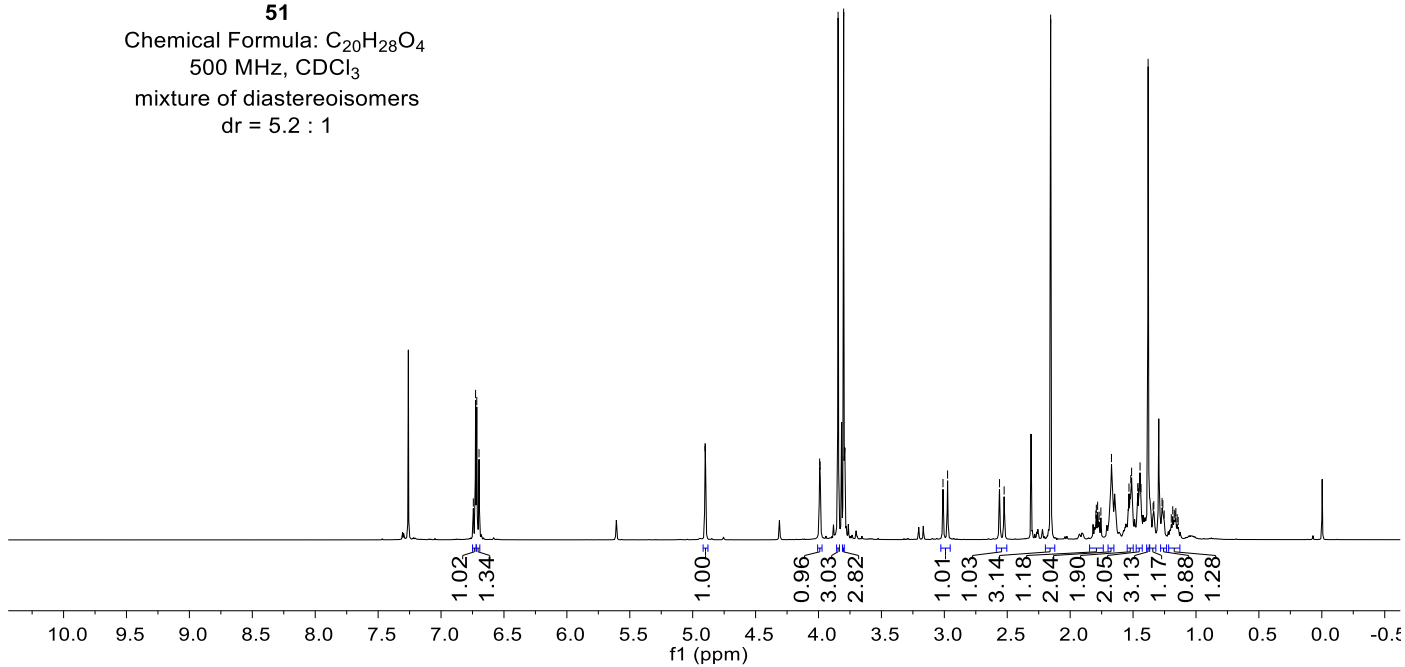

HM-VI-133B-1 C

-212.08

151.42  
151.37

126.75  
126.03

108.73  
107.48

-72.61

55.73  
55.49

37.56  
31.36  
30.72  
29.56  
27.89  
25.92  
21.63  
21.55  
17.56

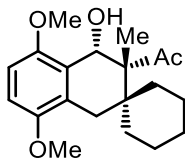

**51**

Chemical Formula: C<sub>20</sub>H<sub>28</sub>O<sub>4</sub>

125 MHz, CDCl<sub>3</sub>

mixture of diastereoisomers

dr = 5.2 : 1

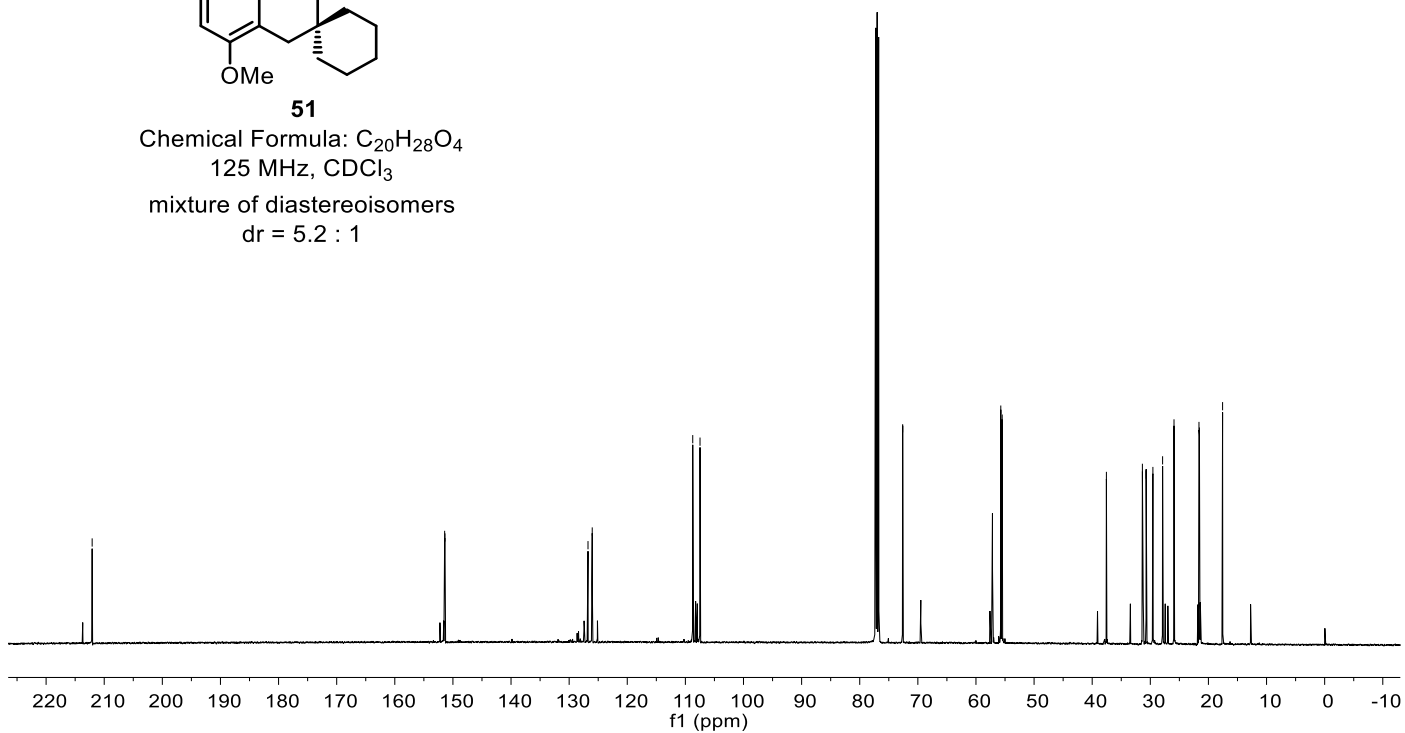

6.91  
6.76  
4.88  
4.87  
4.87  
4.02  
4.02  
3.86  
3.81  
3.71  
3.71  
3.70  
3.69  
3.69  
3.68  
3.68  
3.66  
3.65  
3.65  
3.63  
3.62  
3.26  
3.22  
2.60  
2.56  
2.19  
2.17  
2.16  
2.15  
2.14  
2.14  
2.12  
2.11  
1.90  
1.89  
1.88  
1.86  
1.86  
1.85  
1.85  
1.29  
1.29  
1.28  
1.24  
1.20  
1.19  
1.19  
1.18  
1.16  
1.15

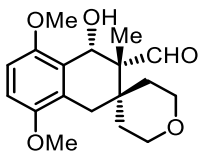

52

Chemical Formula: C<sub>18</sub>H<sub>24</sub>O<sub>5</sub>  
400 MHz, CDCl<sub>3</sub>

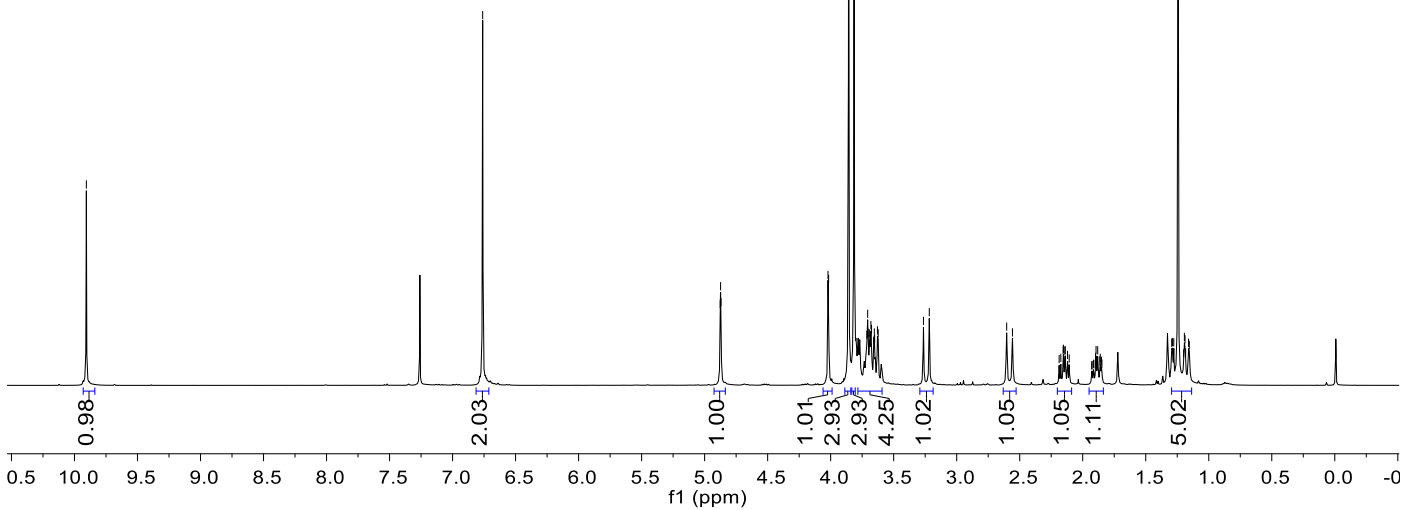

HM-VI-2022B-1 C

203.66

151.67  
151.43

126.00  
124.26

108.95  
108.10

71.15  
63.25  
62.87  
55.64  
55.60  
55.59  
55.55  
53.99

35.49  
31.72  
29.71  
27.54

12.49

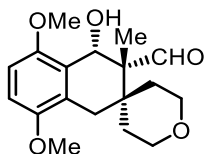

52

Chemical Formula: C<sub>18</sub>H<sub>24</sub>O<sub>5</sub>  
100 MHz, CDCl<sub>3</sub>

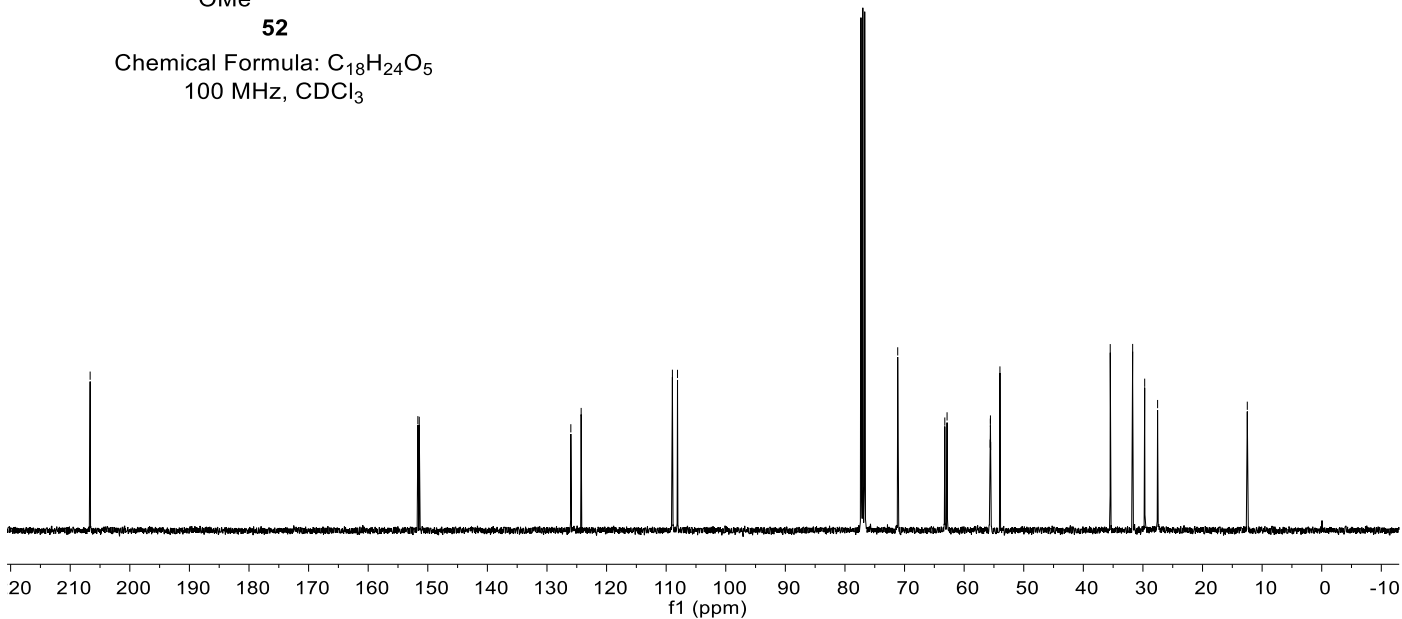

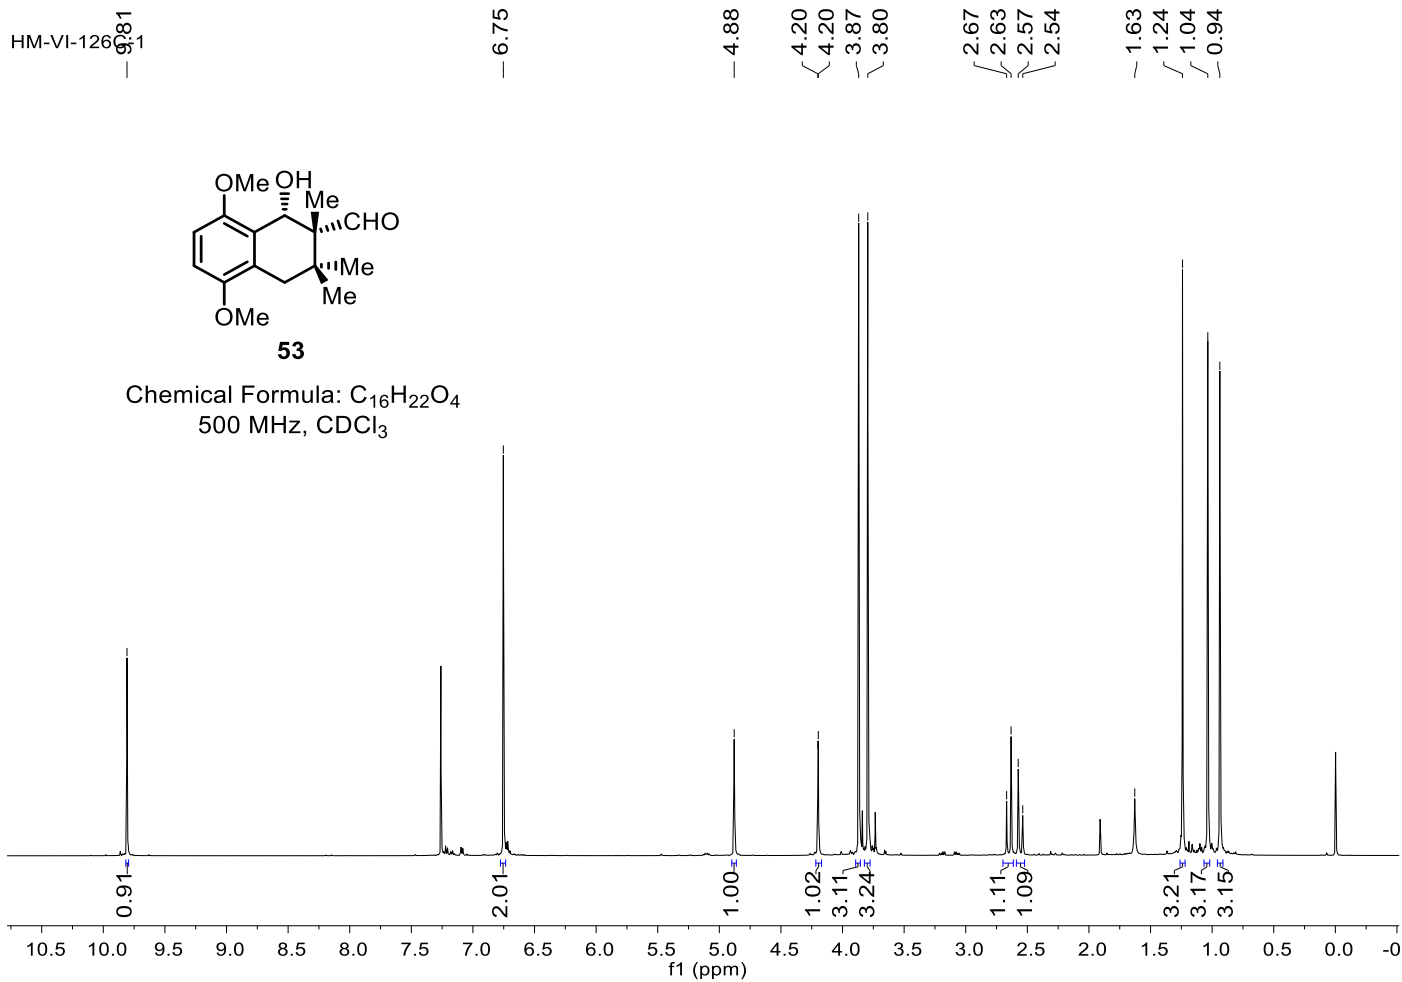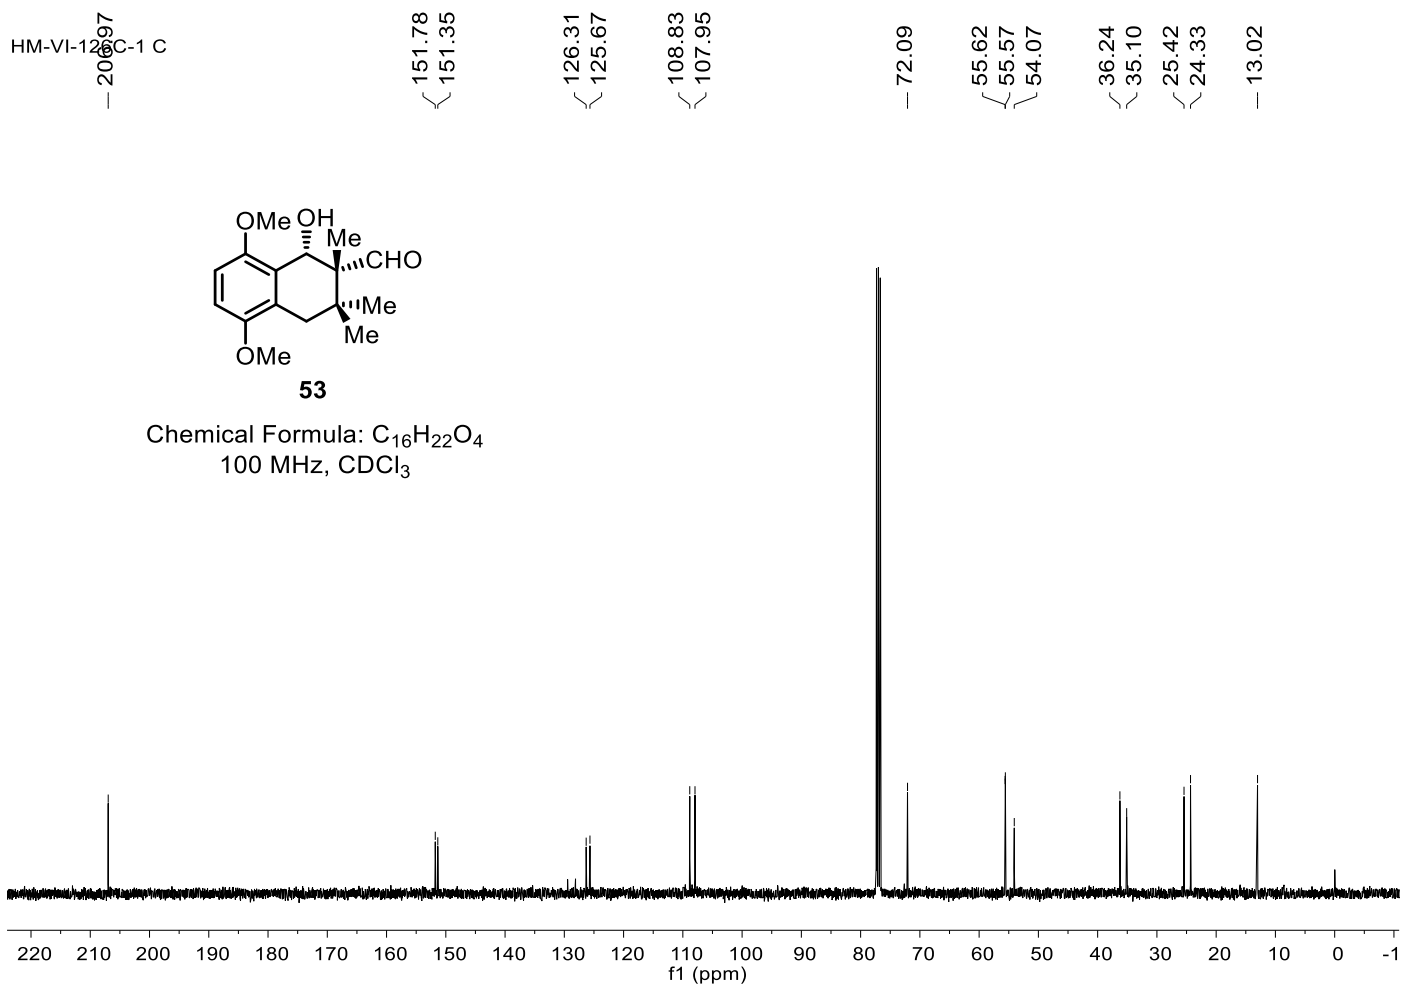

HM-VI-131

6.72  
6.72

4.96  
4.95

3.86  
3.79

2.60  
2.55  
2.53  
2.48  
2.20  
1.62  
1.31  
1.11  
1.07

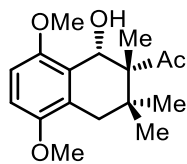

54

Chemical Formula: C<sub>17</sub>H<sub>24</sub>O<sub>4</sub>  
400 MHz, CDCl<sub>3</sub>

mixture of diastereoisomers  
dr = 10 : 1

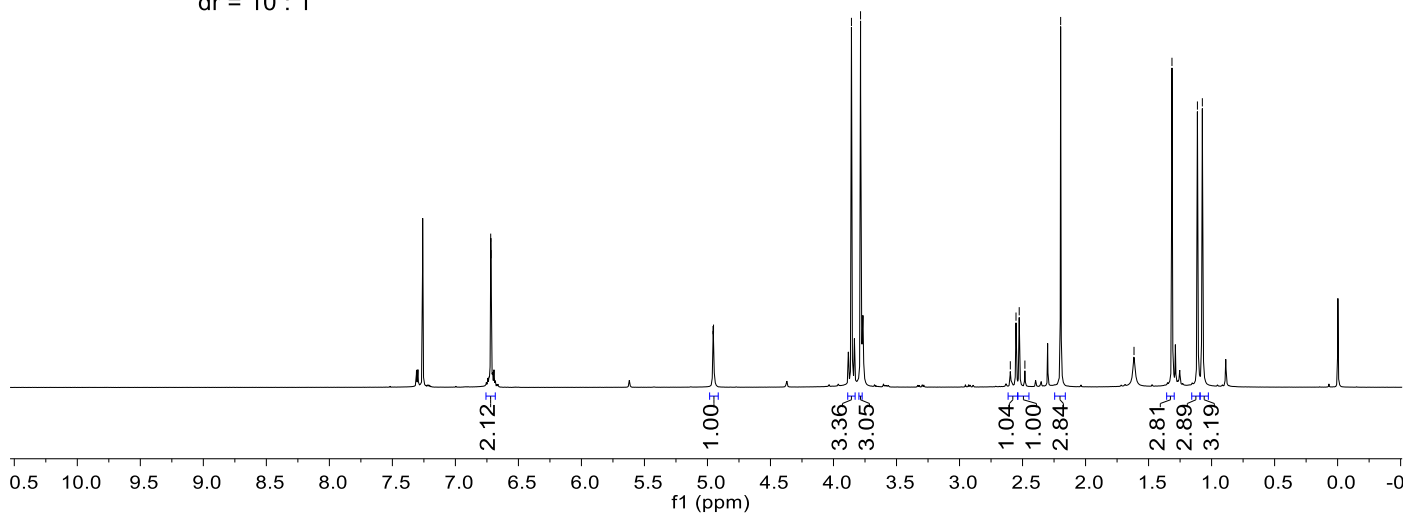

HM-VI-131-1 C

217.45

151.61  
151.20

126.50  
126.23

108.72  
107.44

72.45

55.88  
55.64  
55.50

37.34

34.38

29.56

25.63

25.42

18.33

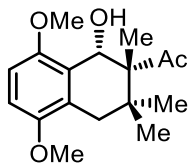

54

Chemical Formula: C<sub>17</sub>H<sub>24</sub>O<sub>4</sub>  
100 MHz, CDCl<sub>3</sub>

mixture of diastereoisomers  
dr = 10 : 1

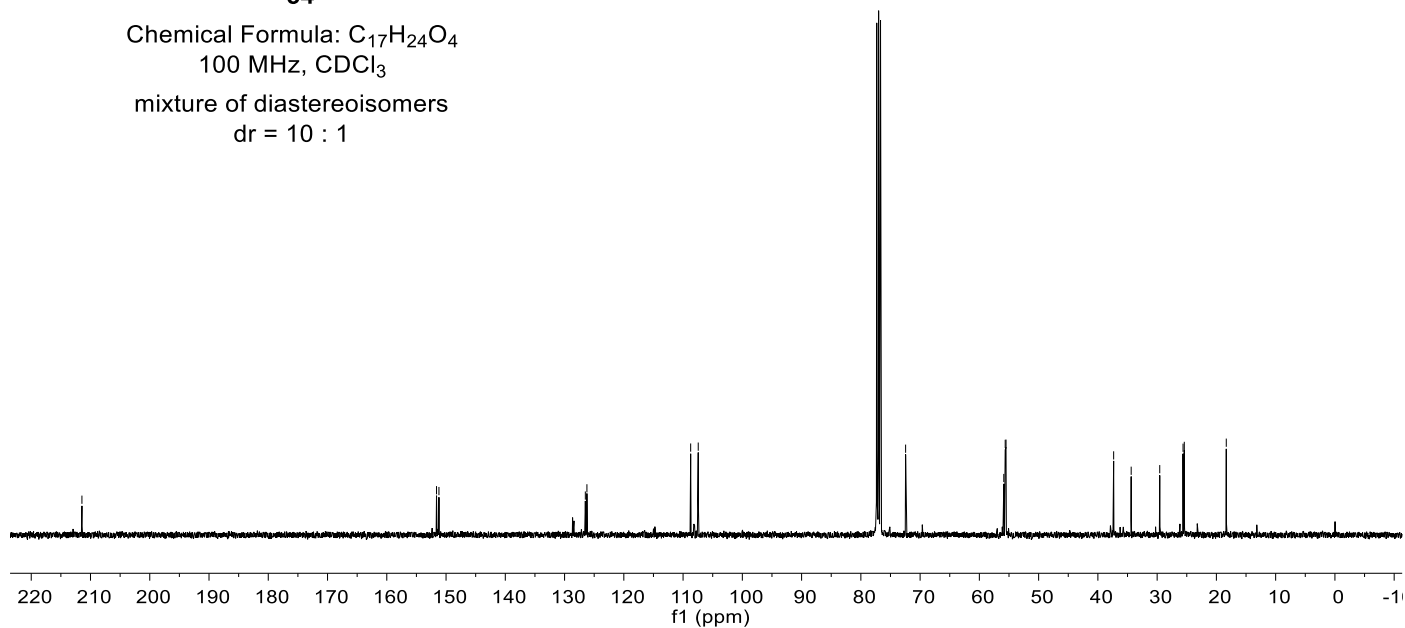

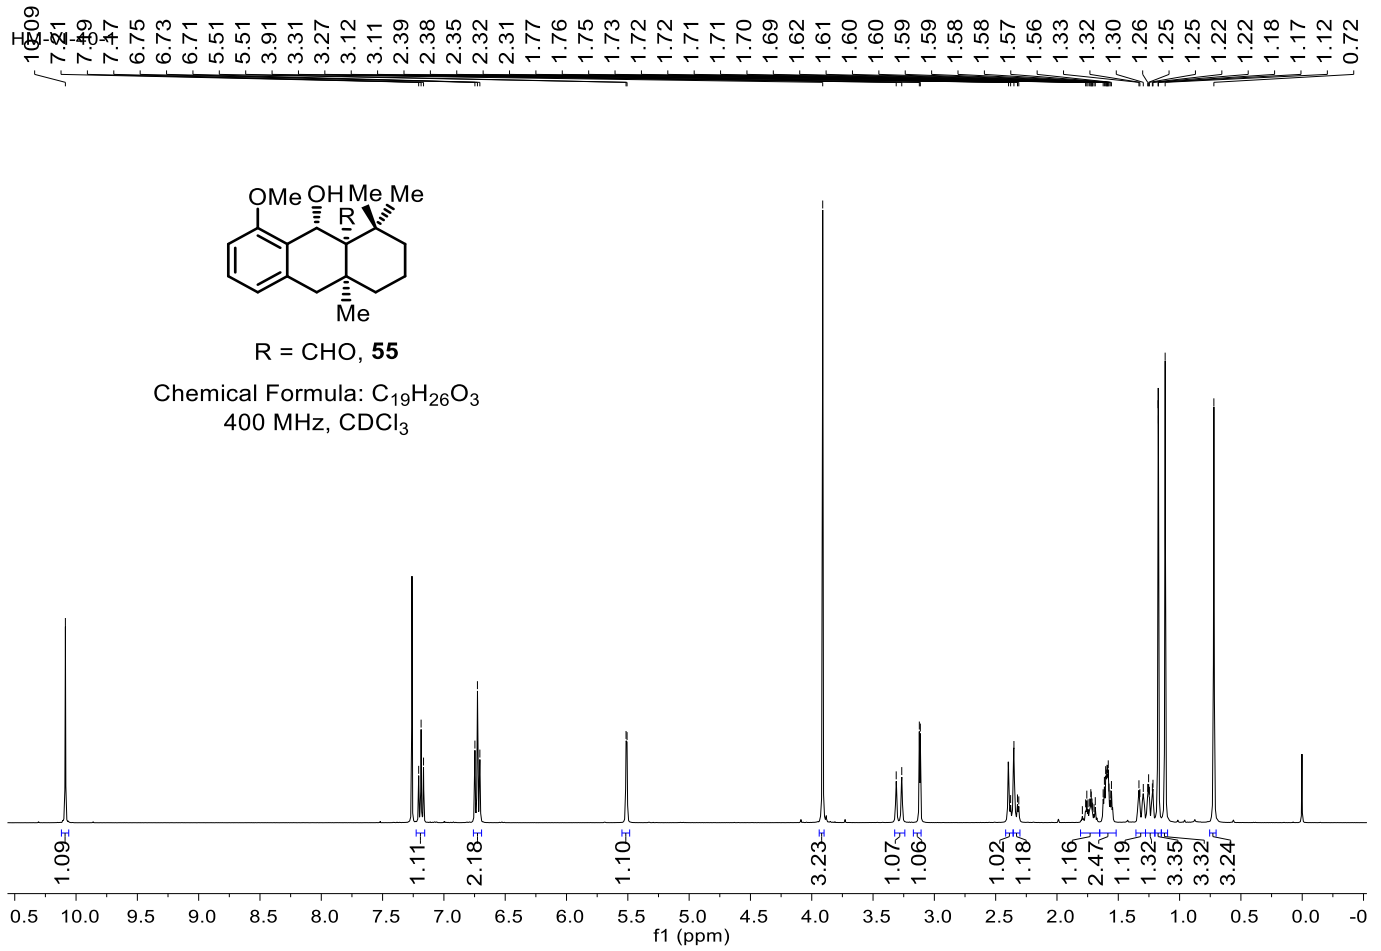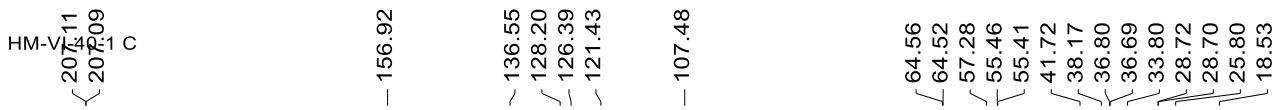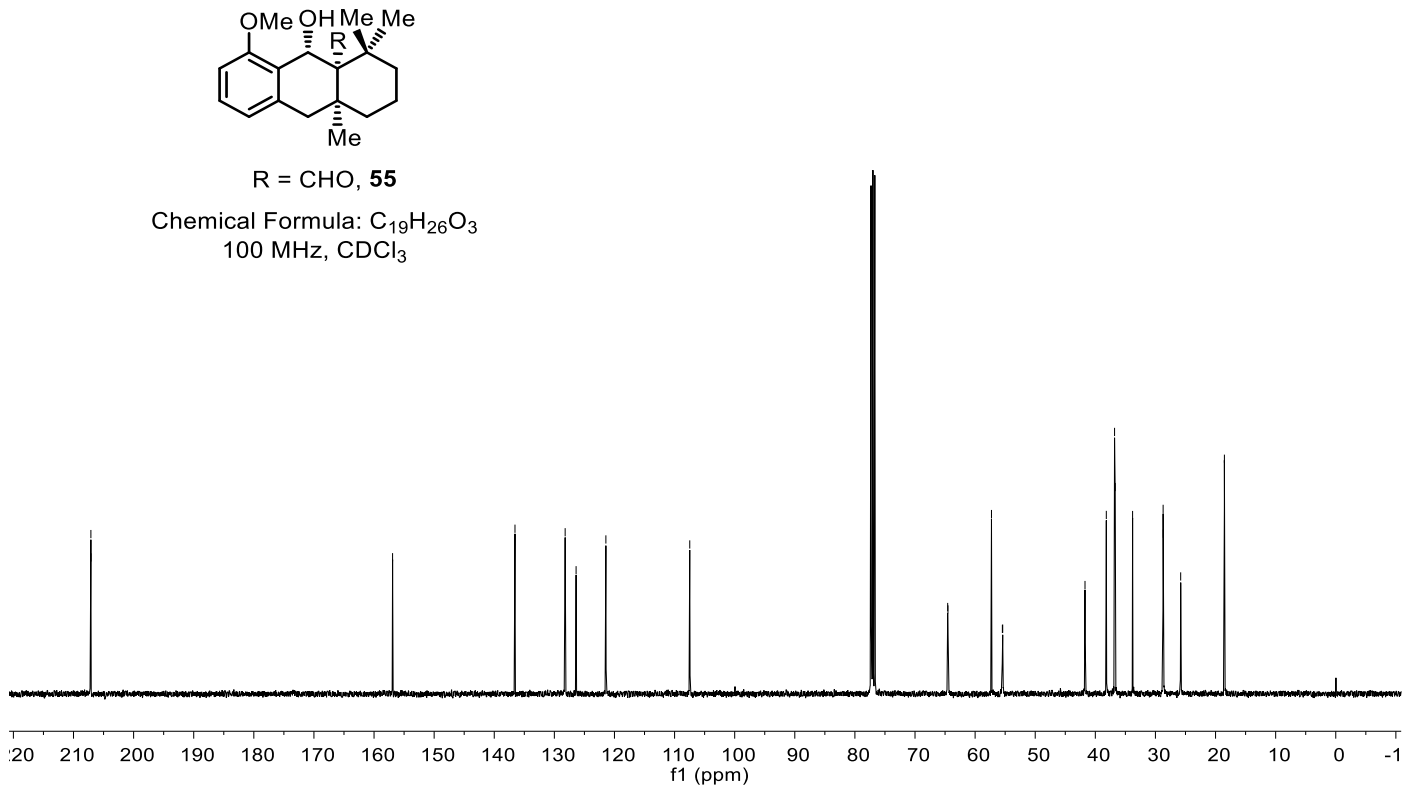

10007  
6.53  
6.53  
6.21  
6.21  
5.44  
3.88  
3.80  
3.78  
3.77  
3.28  
3.24  
2.97  
2.35  
2.34  
2.34  
2.30  
2.30  
1.75  
1.71  
1.61  
1.60  
1.59  
1.59  
1.58  
1.57  
1.57  
1.56  
1.54  
1.31  
1.30  
1.28  
1.28  
1.27  
1.26  
1.25  
1.25  
1.24  
1.23  
1.23  
1.22  
1.22  
1.21  
1.21  
1.21  
1.20  
1.17  
1.17  
1.10  
0.72

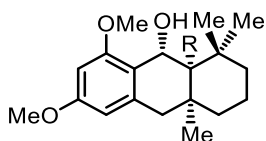

R = CHO, **56**

Chemical Formula: C<sub>20</sub>H<sub>28</sub>O<sub>4</sub>  
400 MHz, CDCl<sub>3</sub>

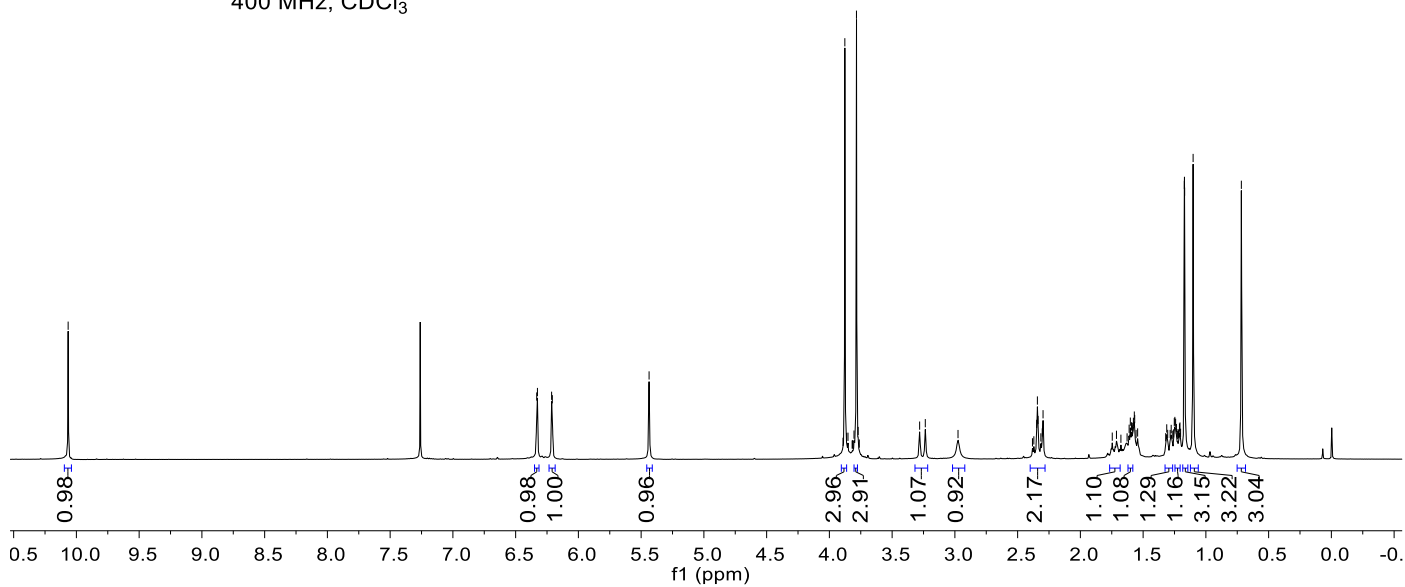

HM-VI  
17.24  
1.24  
C

159.83  
158.10

137.42

119.35

104.03

96.51

64.39  
57.37  
55.48  
55.19  
42.25  
38.22  
36.80  
36.74  
33.94  
28.87  
28.74  
25.83  
18.54

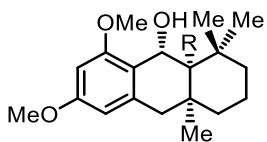

R = CHO, **56**

Chemical Formula: C<sub>20</sub>H<sub>28</sub>O<sub>4</sub>  
100 MHz, CDCl<sub>3</sub>

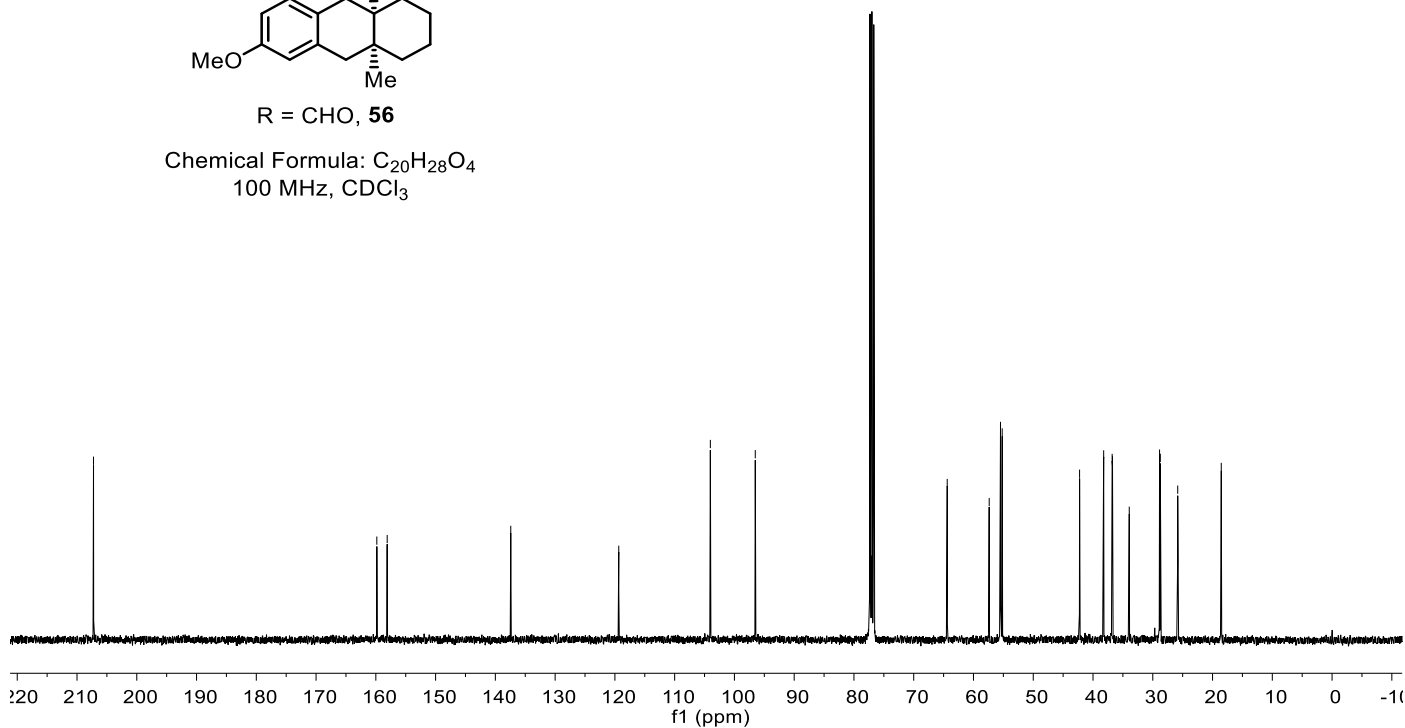

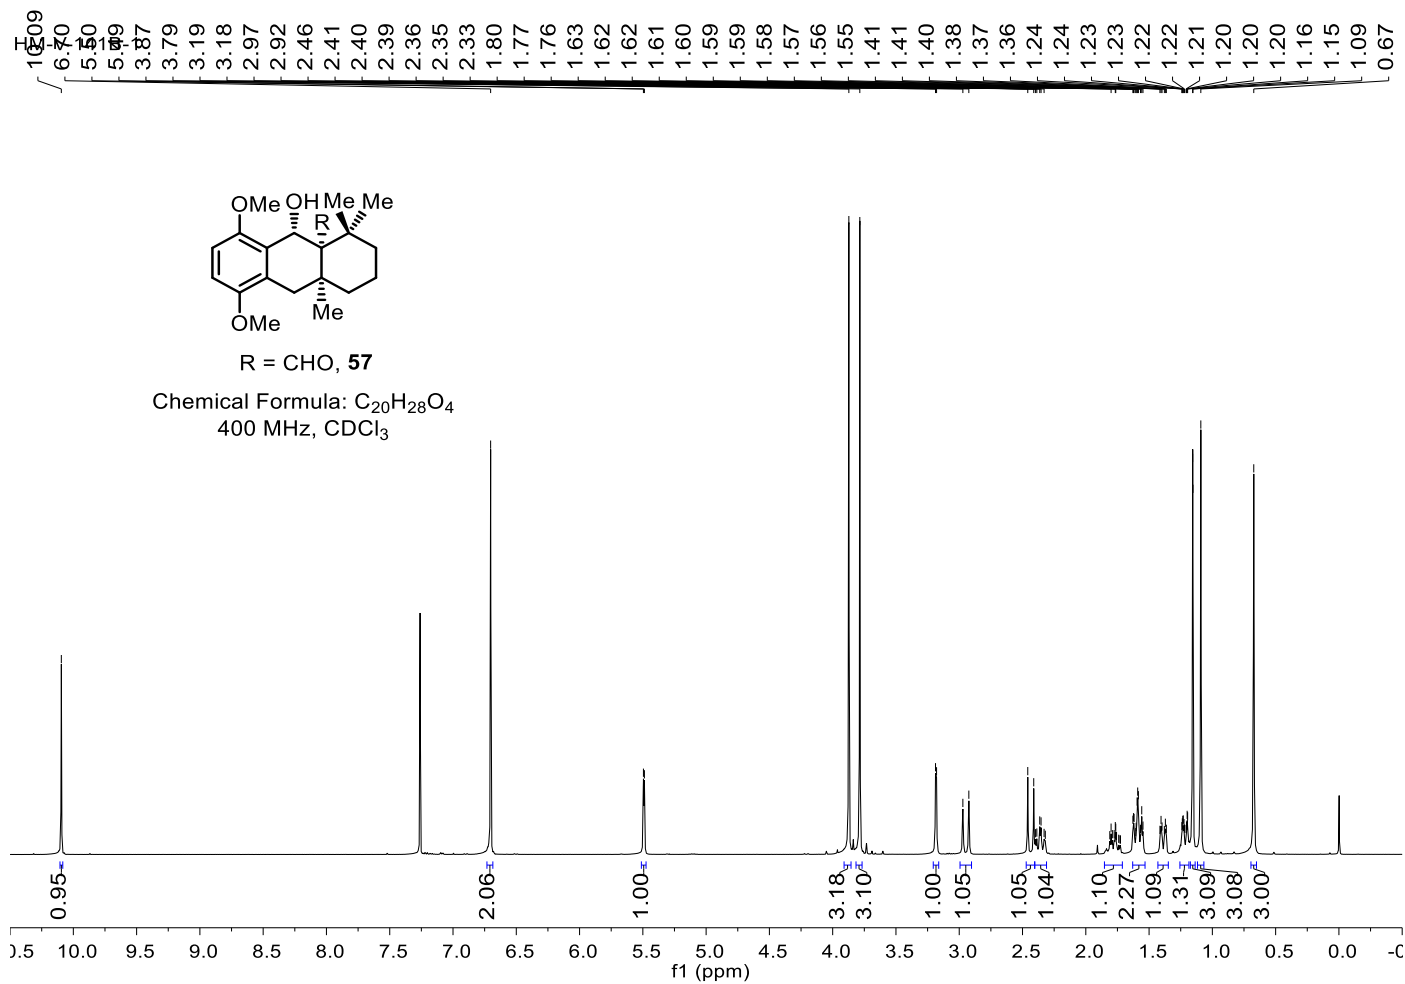

HM-V  
 201.28  
 4.26  
 201.1 C

151.24  
 150.83

127.51  
 125.59

108.42  
 107.24

64.62  
 64.59  
 56.94  
 55.70  
 55.67  
 55.53  
 55.49  
 38.24  
 36.83  
 36.78  
 36.42  
 33.17  
 29.09  
 28.64  
 25.84  
 18.55

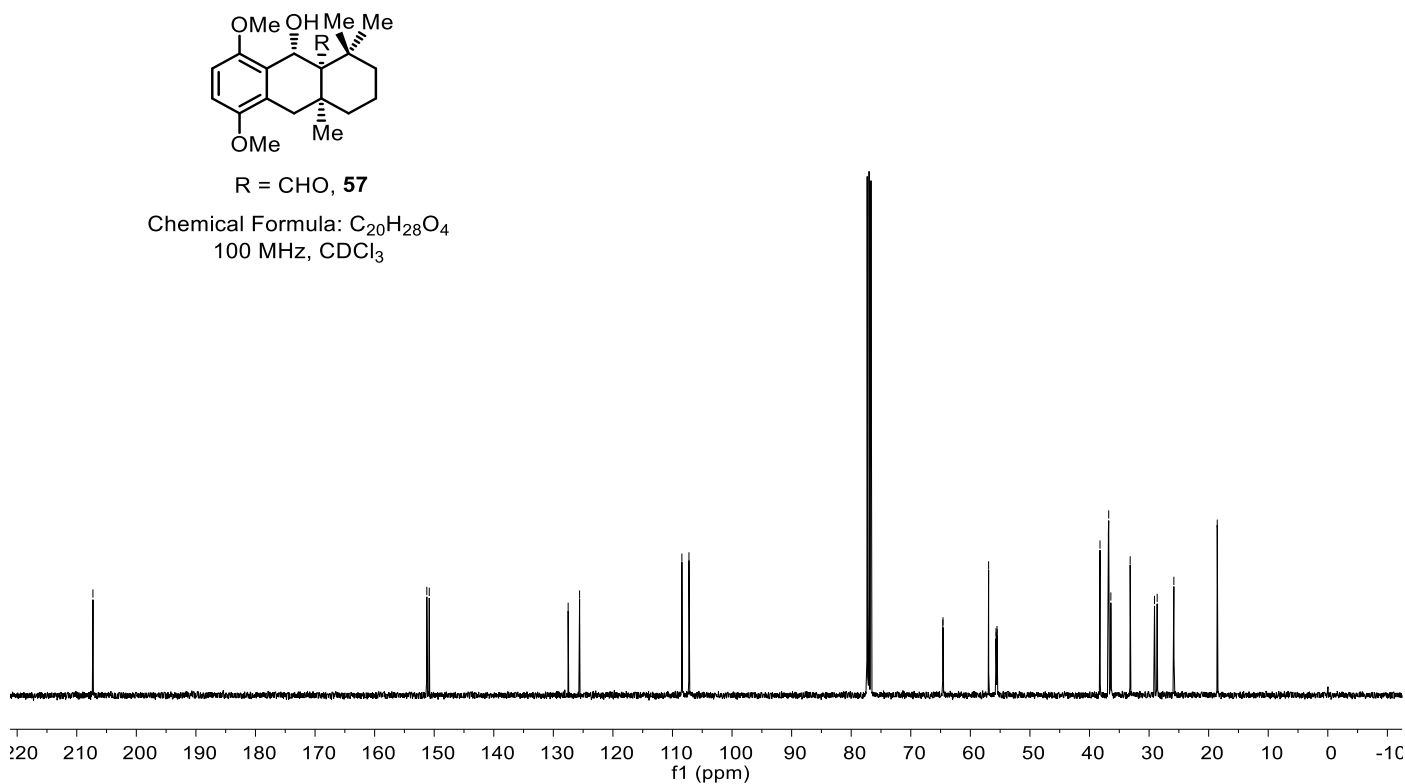



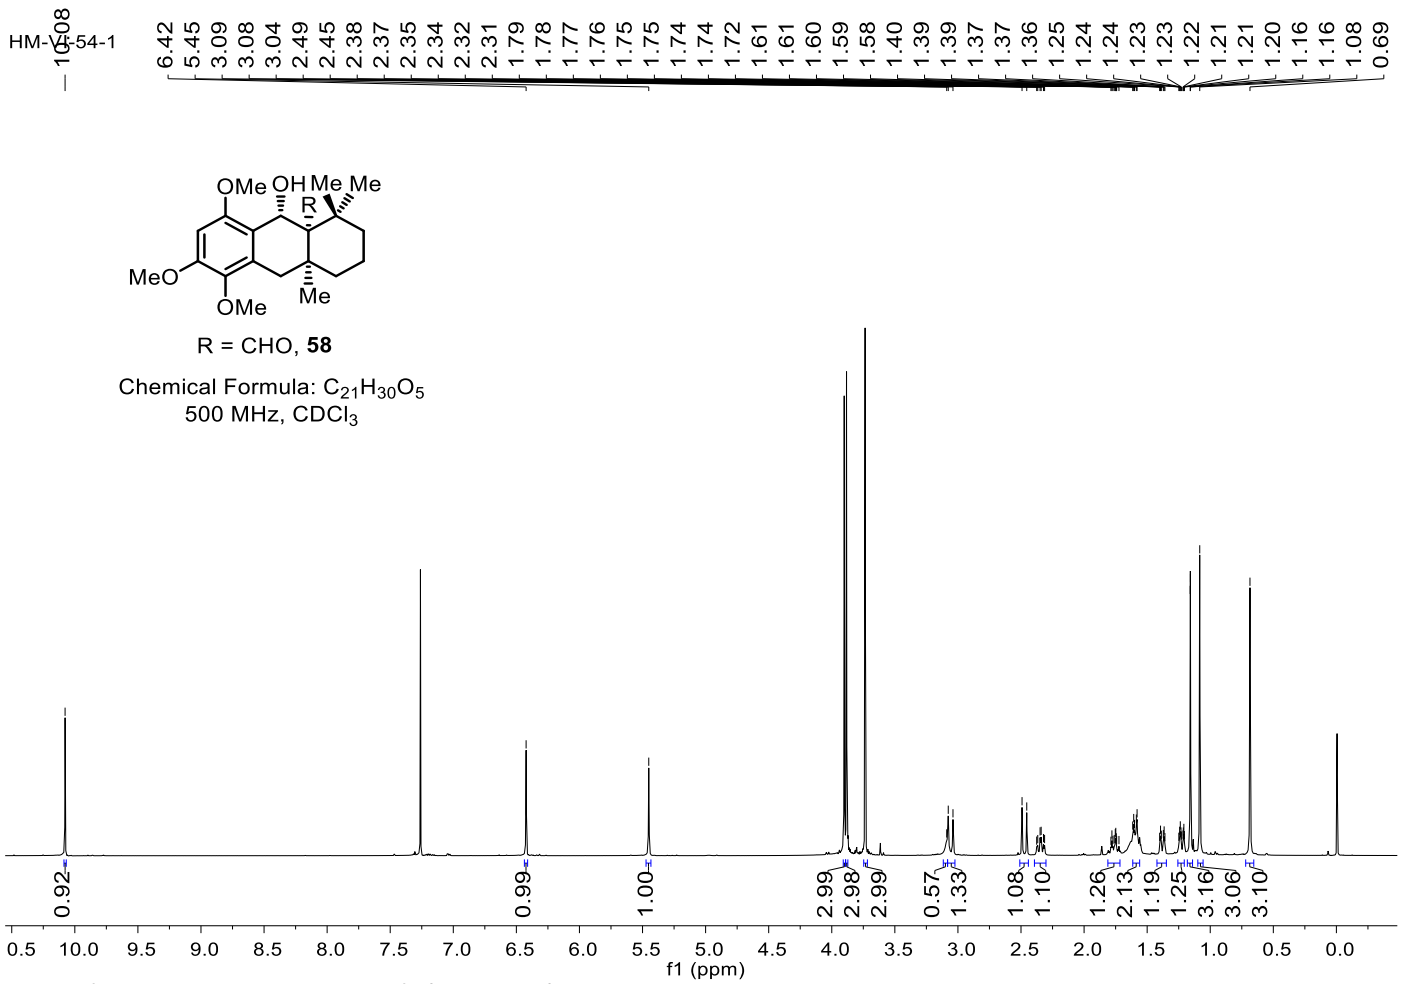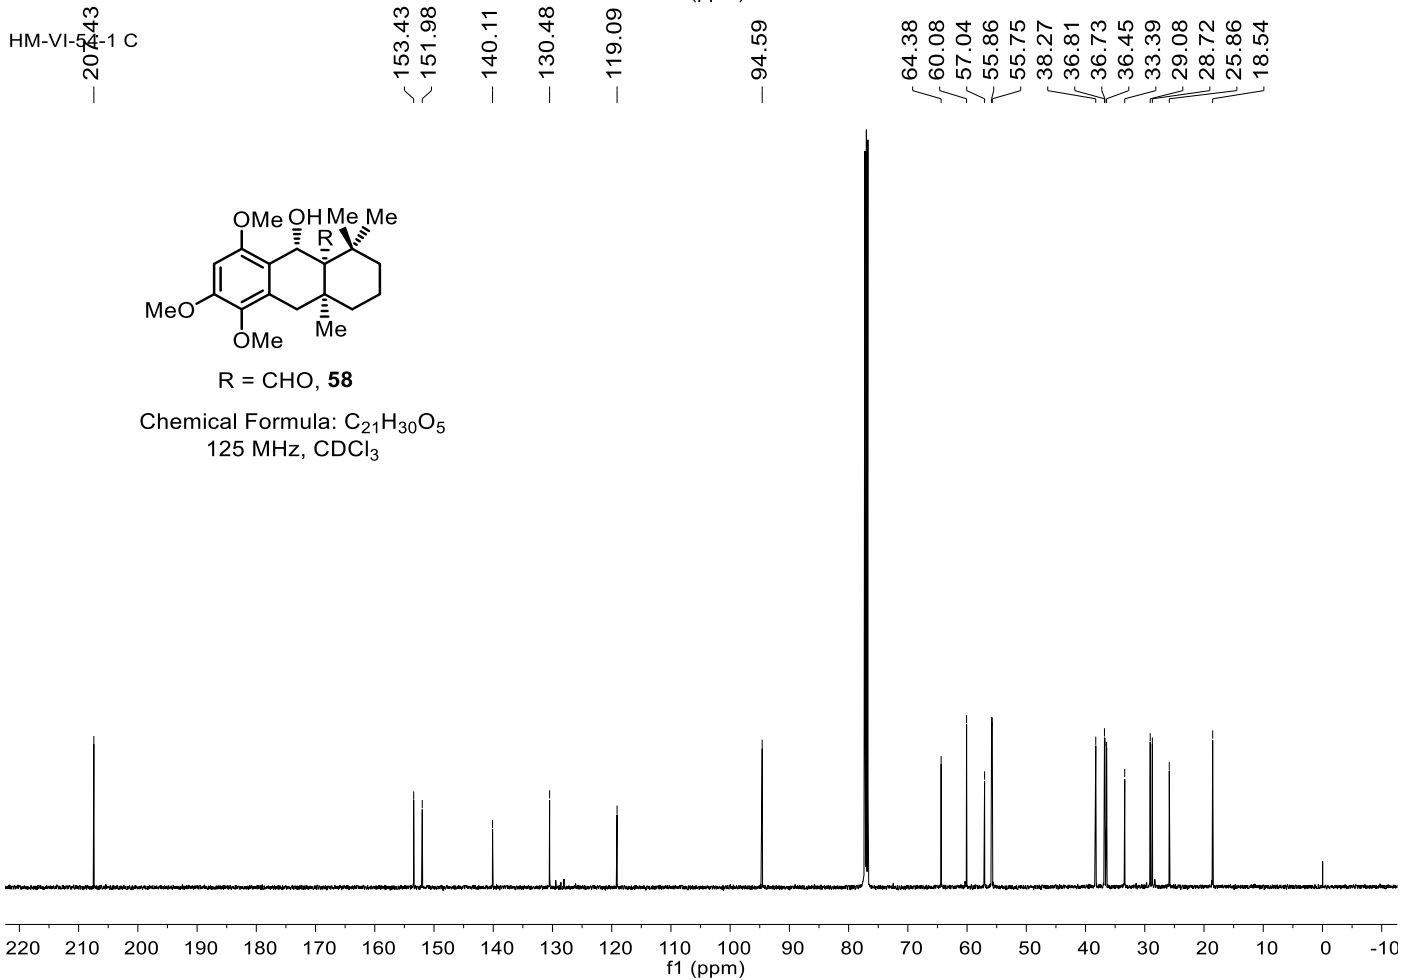

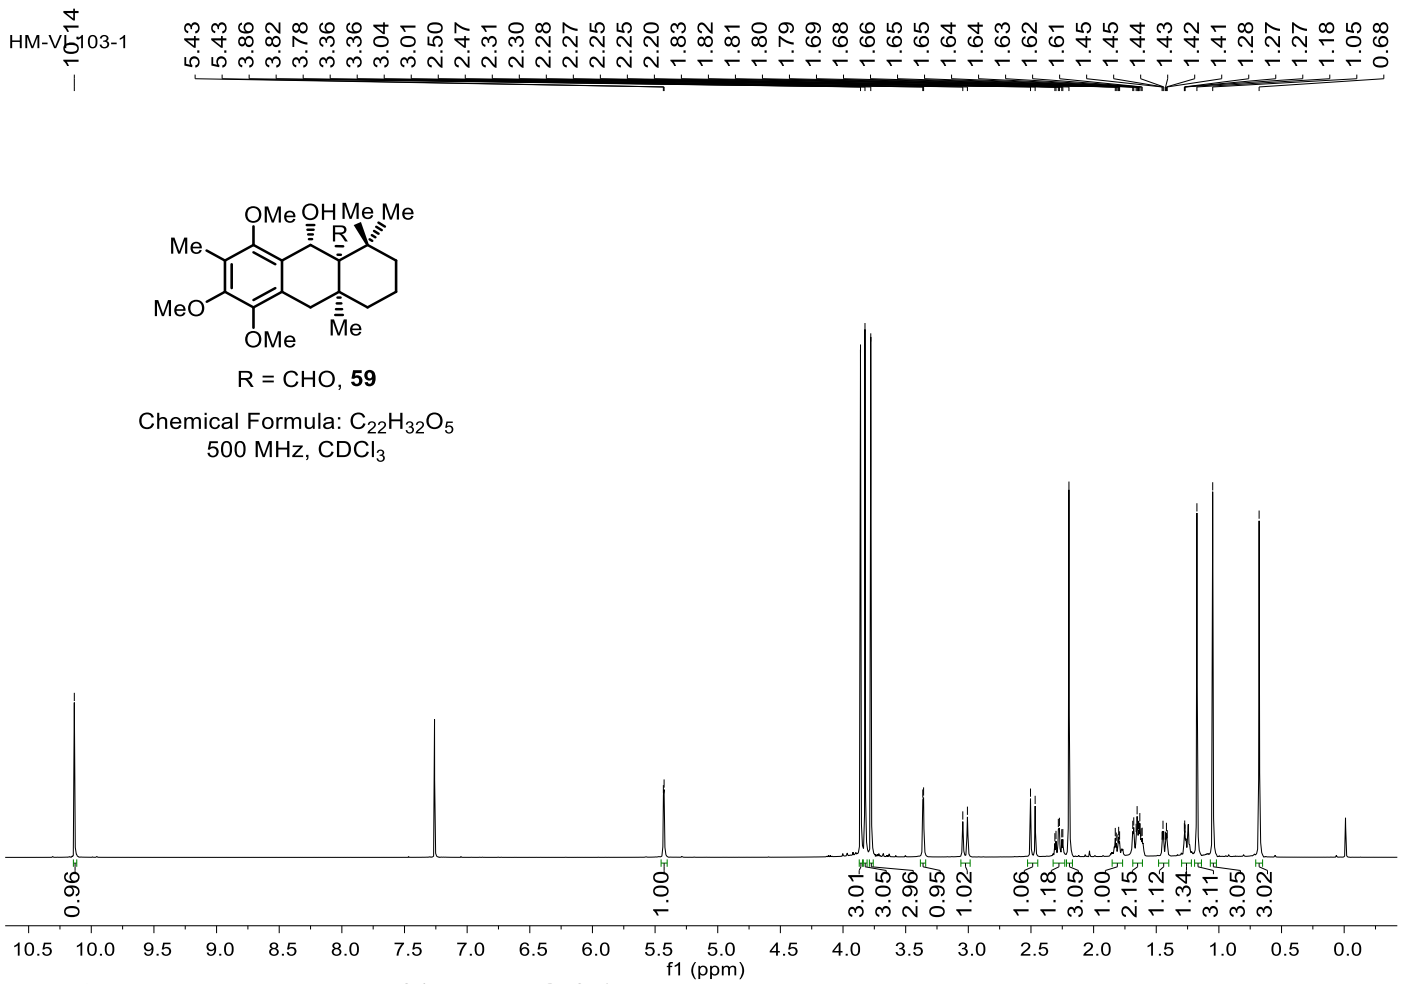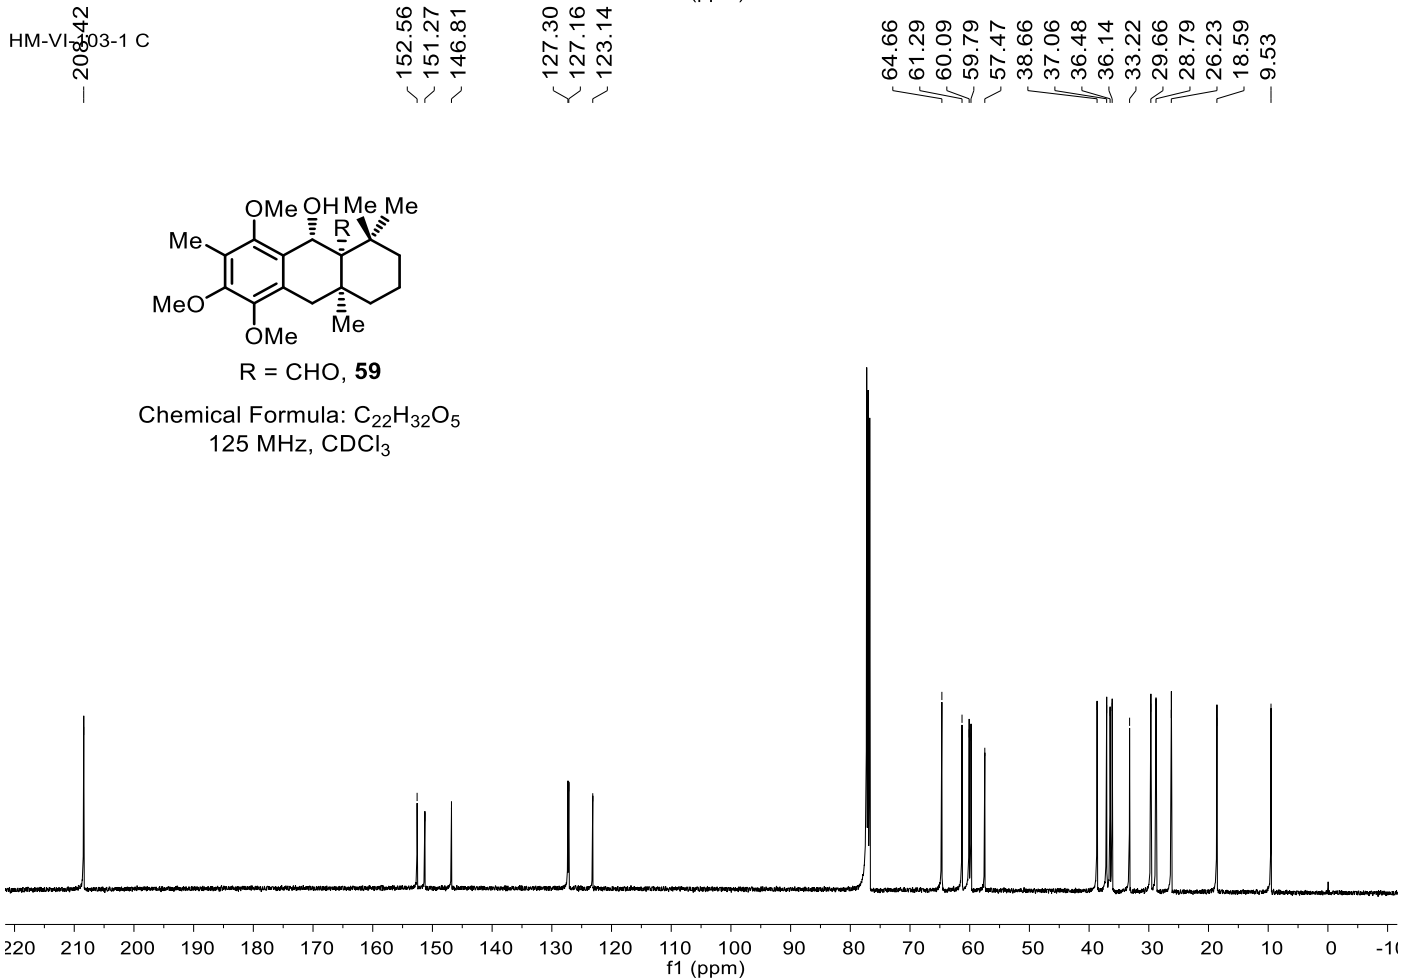

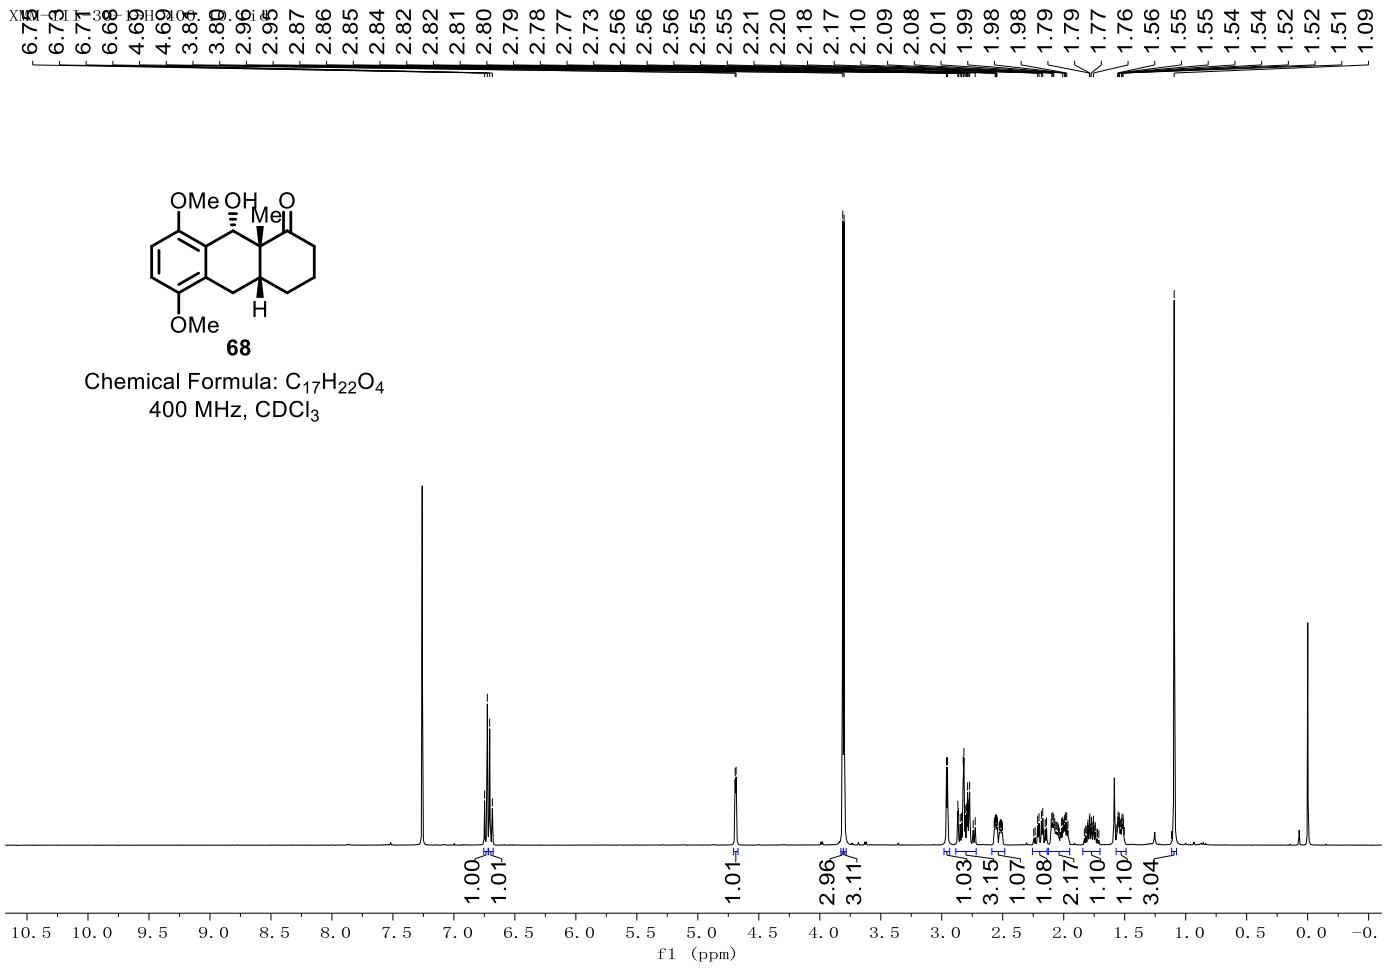

12-III-30-1-C 400.30.fid

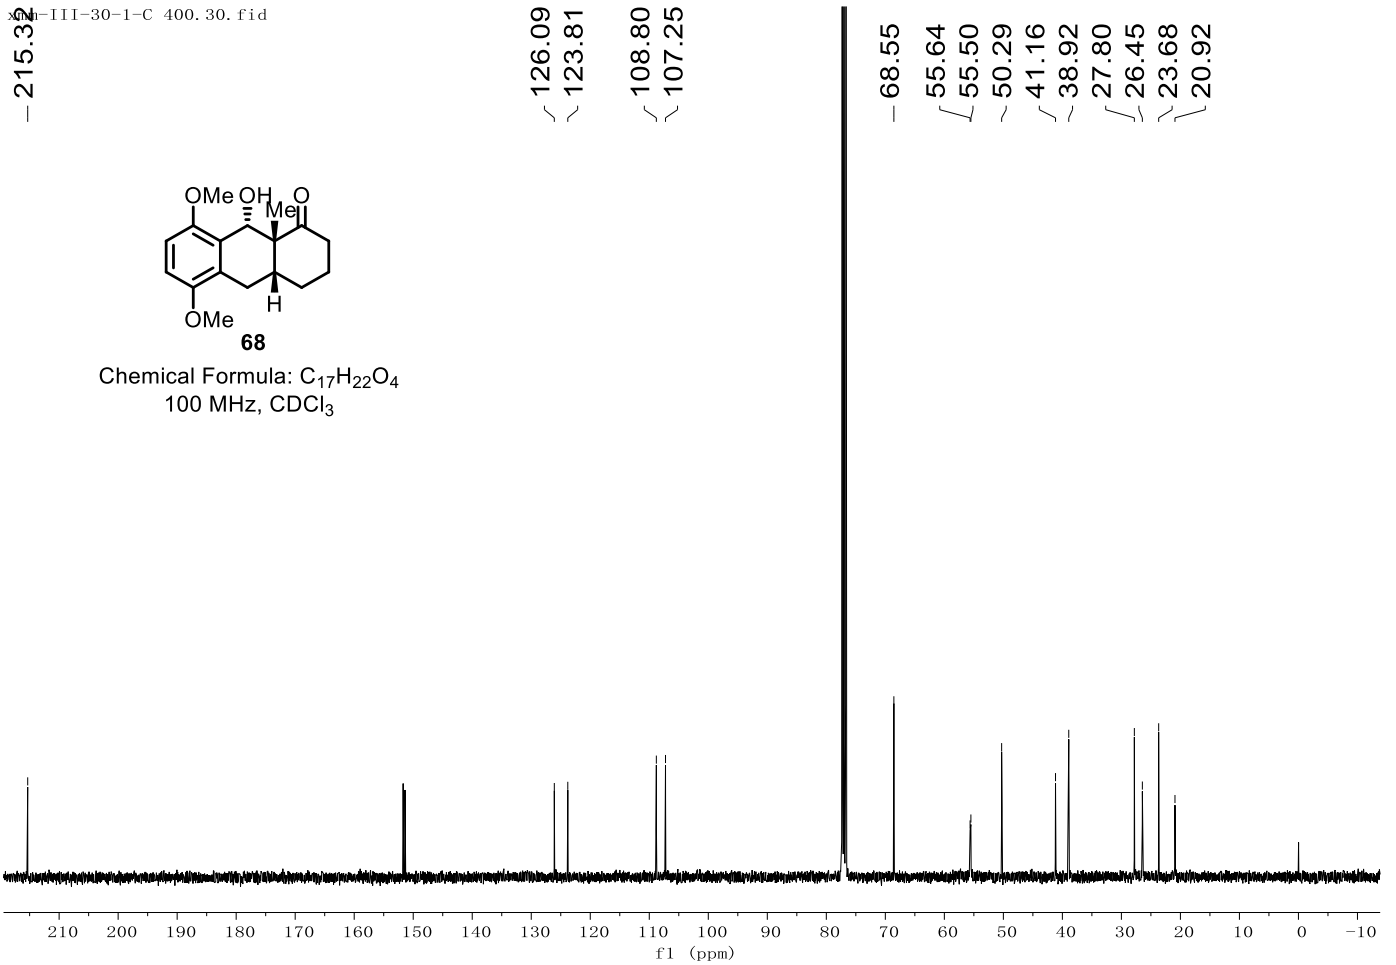

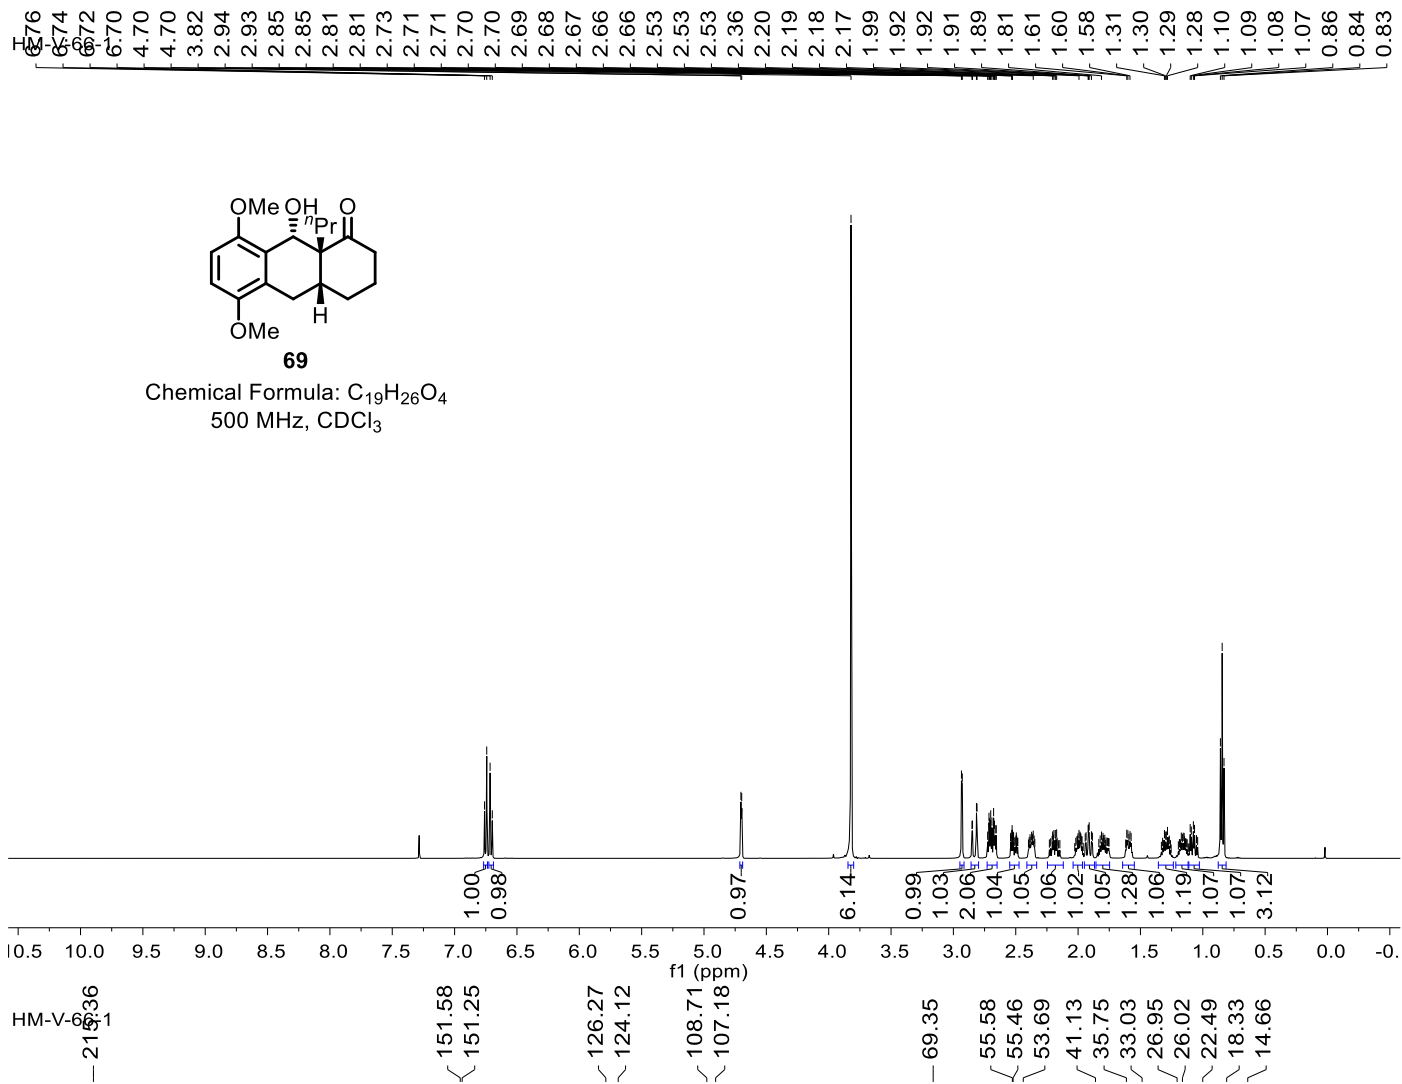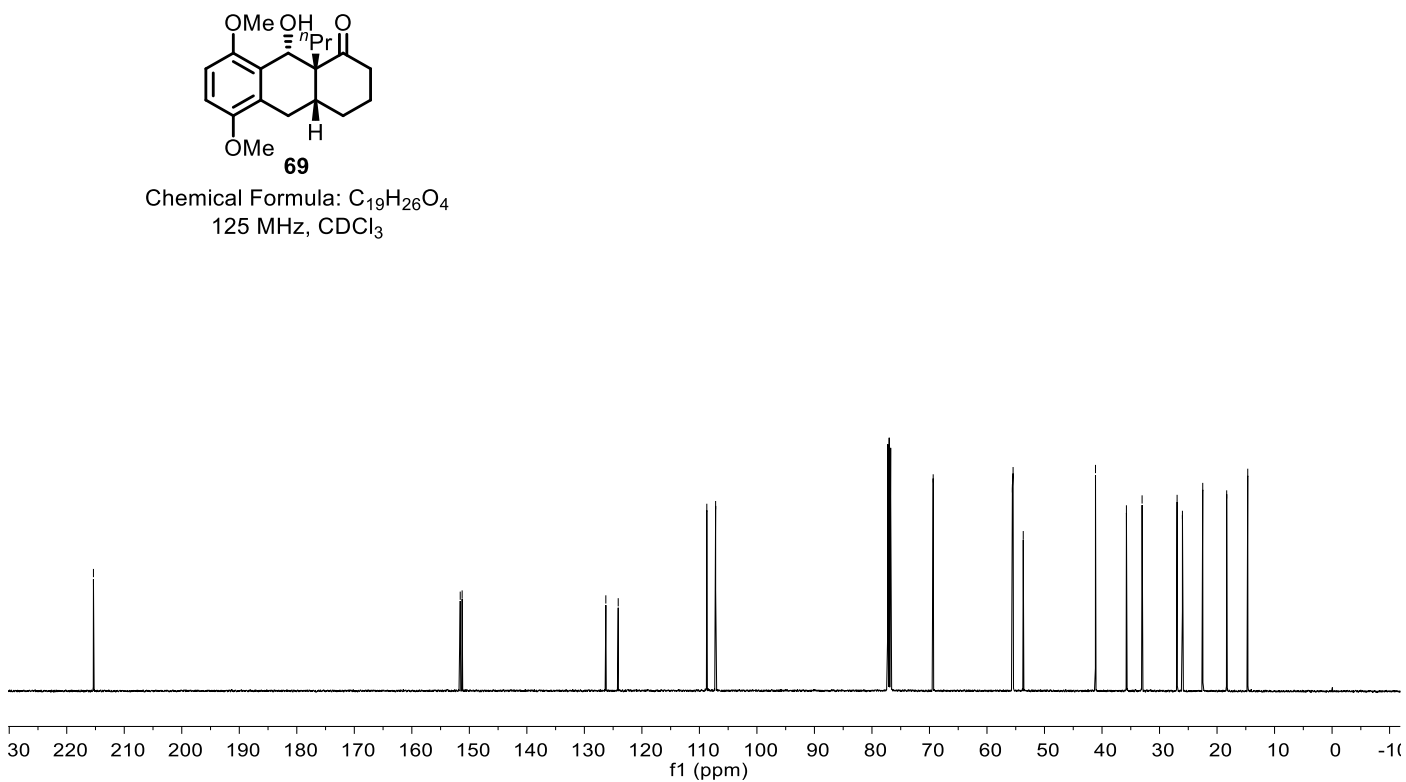

6.75  
6.73  
6.69  
6.67  
5.43  
5.40  
3.80  
3.79  
3.04  
3.03  
3.00  
2.98  
2.71  
2.69  
2.67  
2.65  
2.52  
2.51  
2.50  
2.49  
2.48  
2.47  
2.46  
2.37  
2.36  
2.34  
2.33  
1.98  
1.97  
1.96  
1.95  
1.94  
1.93  
1.92  
1.91  
1.90  
1.89  
1.88  
1.87  
1.86  
1.86  
1.85  
1.85  
1.84  
1.83  
1.81  
0.87  
0.85  
0.78  
0.76

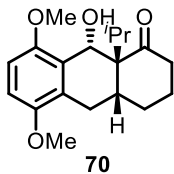

Chemical Formula: C<sub>19</sub>H<sub>26</sub>O<sub>4</sub>  
400 MHz, CDCl<sub>3</sub>

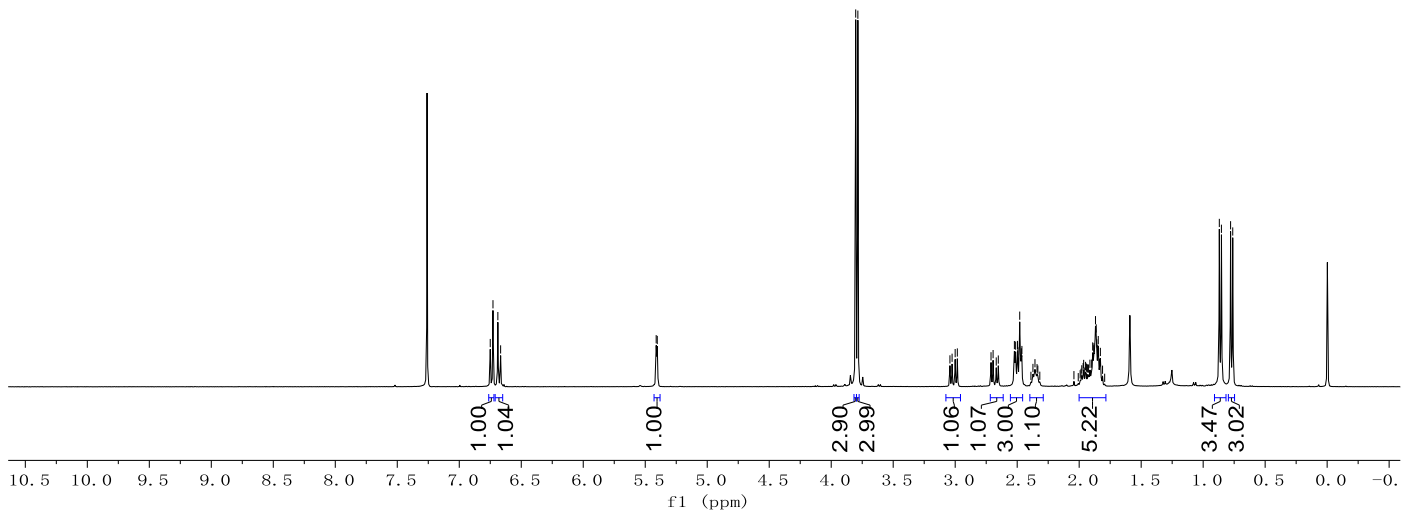

MM-II-104-C. 10. fid

217.59  
150.80  
150.76  
127.43  
126.50  
109.77  
107.89  
67.36  
57.65  
55.87  
55.76  
41.34  
34.51  
34.24  
30.02  
20.77  
18.60  
18.50

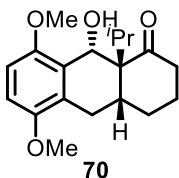

Chemical Formula: C<sub>19</sub>H<sub>26</sub>O<sub>4</sub>  
100 MHz, CDCl<sub>3</sub>

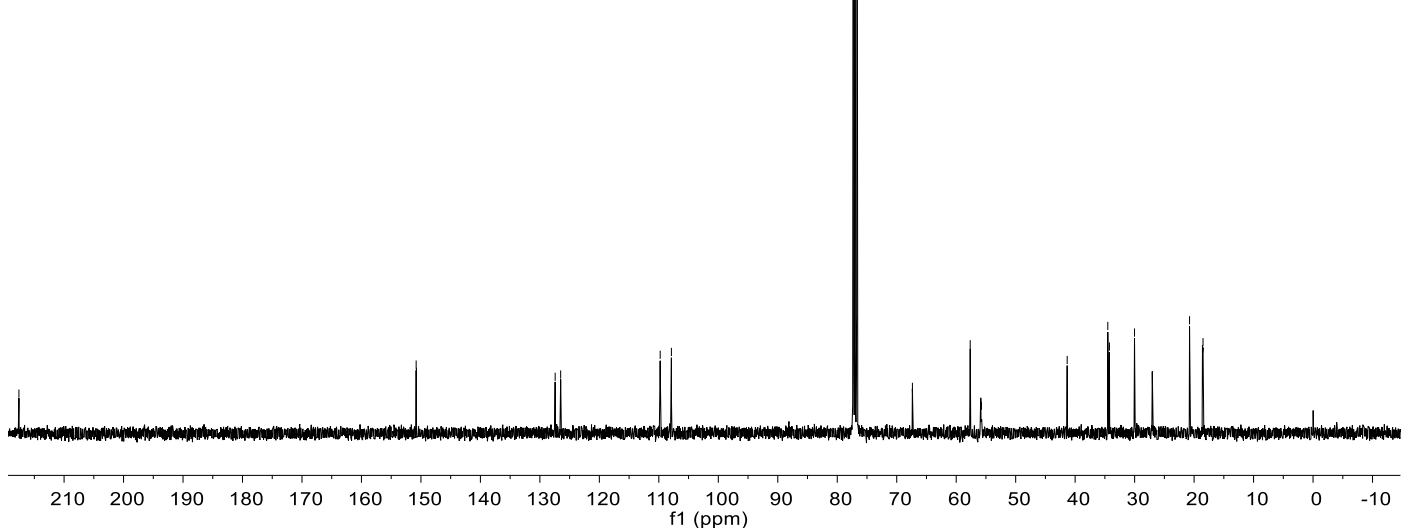

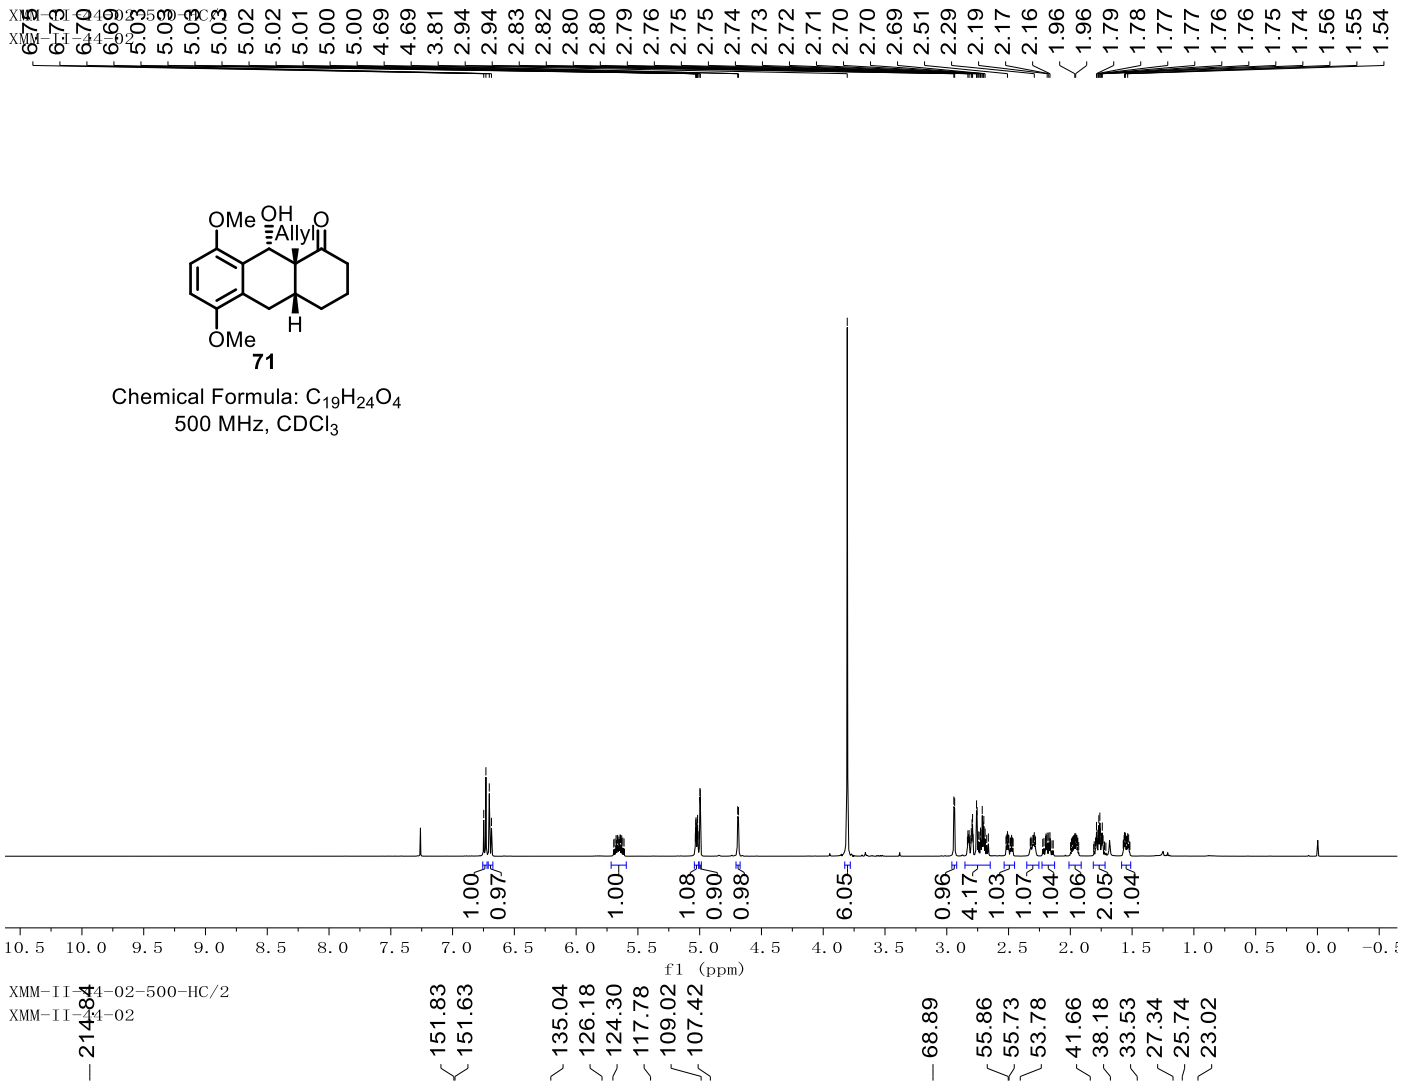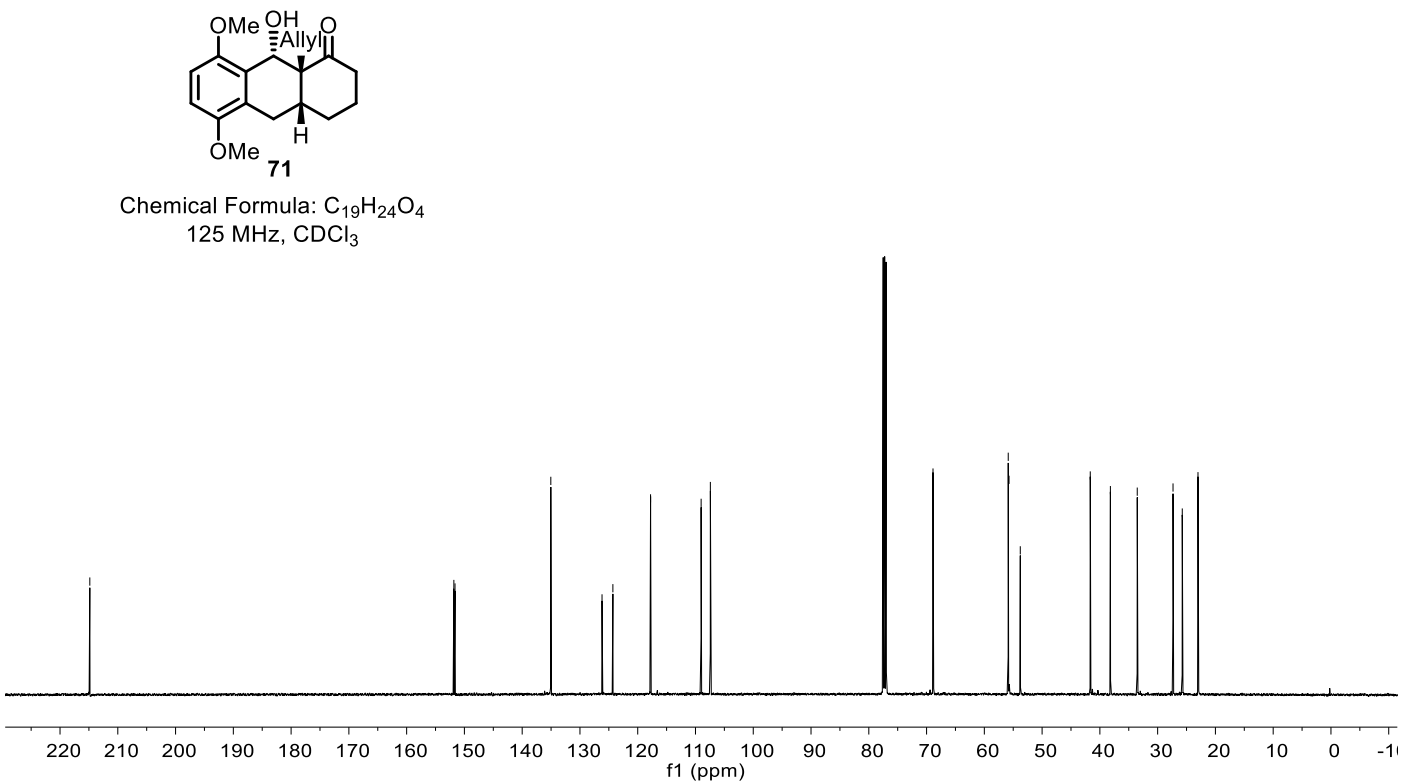

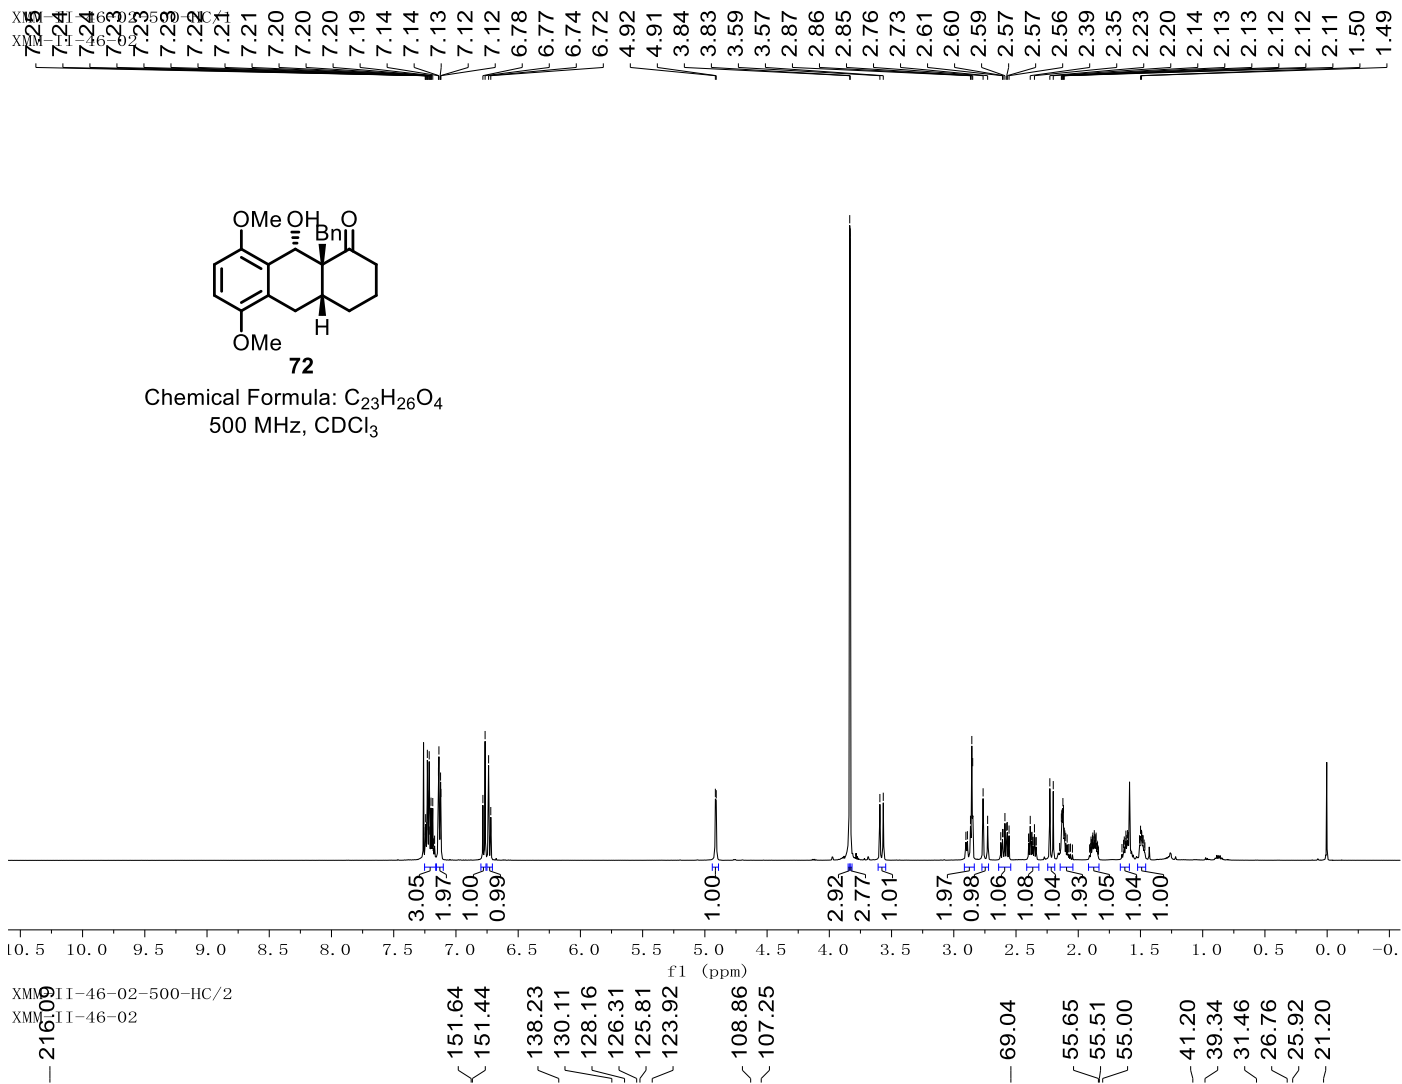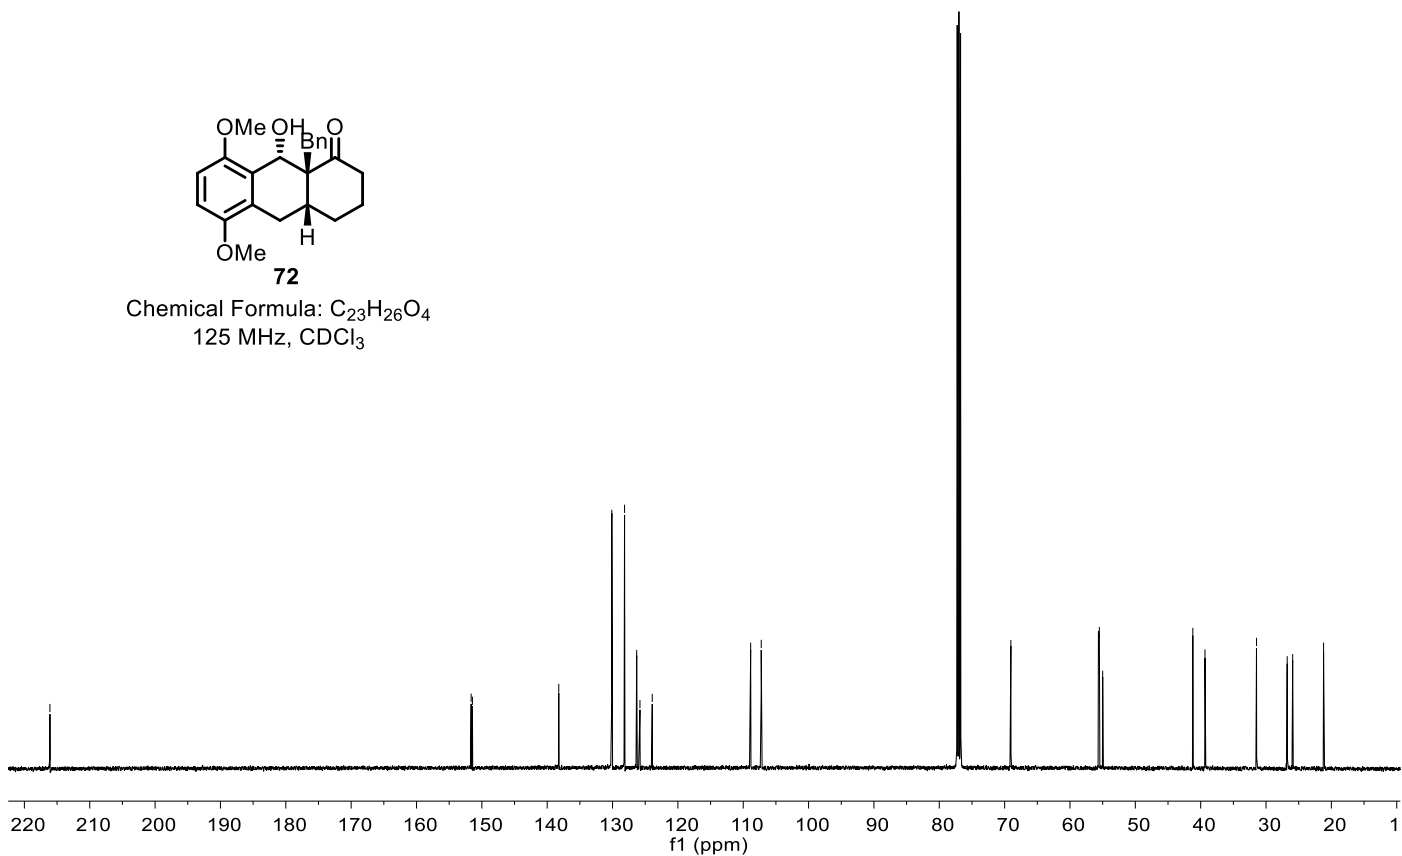

6.78  
6.75  
6.71  
6.68  
4.95  
4.95  
3.81  
3.79  
3.02  
3.00  
2.98  
2.96  
2.88  
2.87  
2.84  
2.83  
2.50  
2.49  
2.48  
2.47  
2.45  
2.45  
2.43  
2.43  
2.38  
2.38  
2.29  
2.27  
2.27  
2.25  
2.23  
2.22  
2.22  
2.21  
2.20  
2.19  
2.18  
2.03  
2.02  
2.01  
2.00  
1.99  
1.98  
1.98  
1.97  
0.96

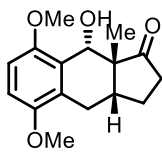

73

Chemical Formula: C<sub>16</sub>H<sub>20</sub>O<sub>4</sub>  
400 MHz, CDCl<sub>3</sub>

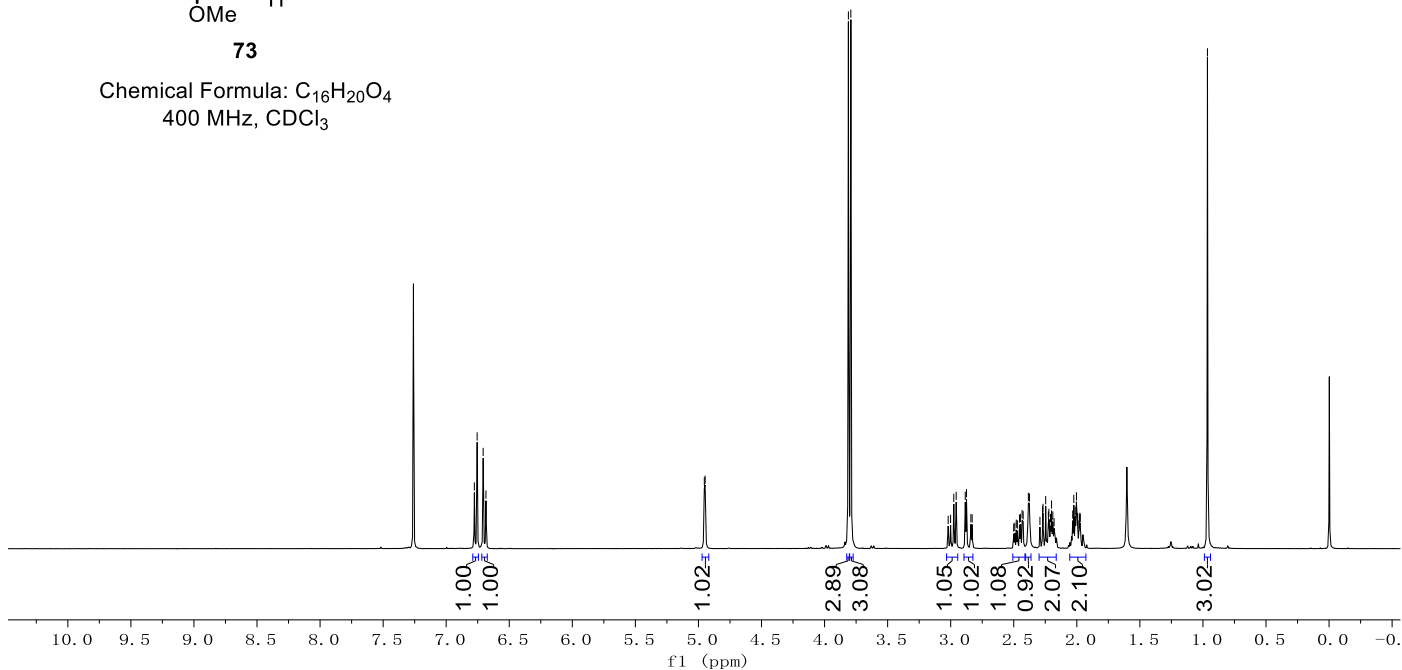

HM-2350.fid

222.35  
151.61  
151.25  
126.16  
124.91  
109.66  
107.72  
67.61  
55.81  
55.76  
50.31  
40.31  
38.73  
26.67  
24.04  
21.15

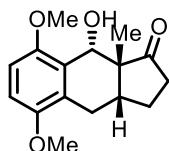

73

Chemical Formula: C<sub>16</sub>H<sub>20</sub>O<sub>4</sub>  
100 MHz, CDCl<sub>3</sub>

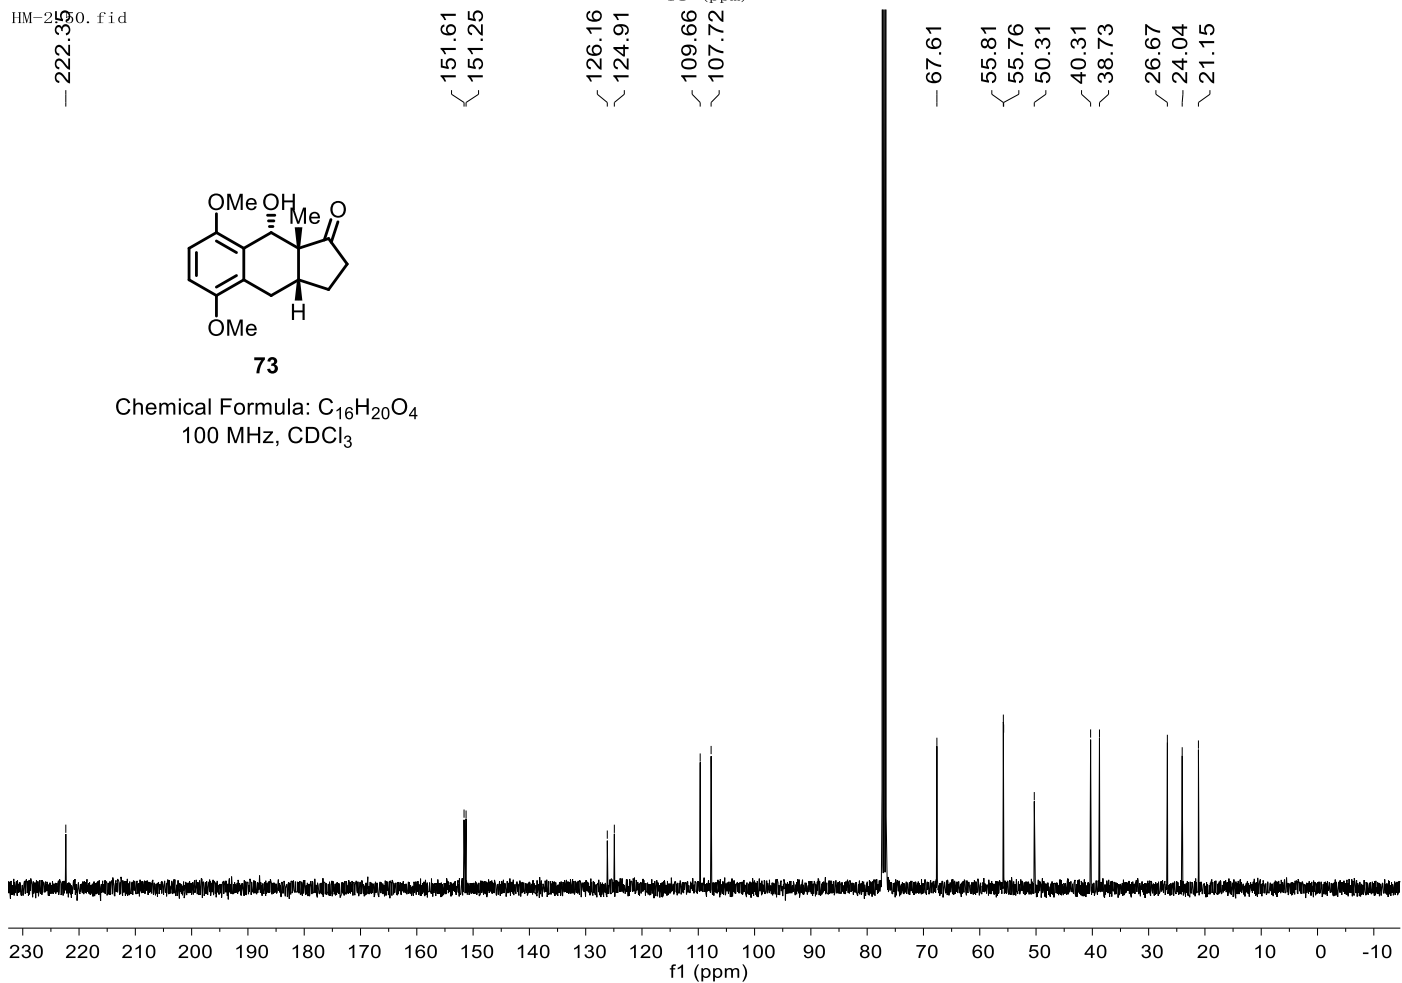



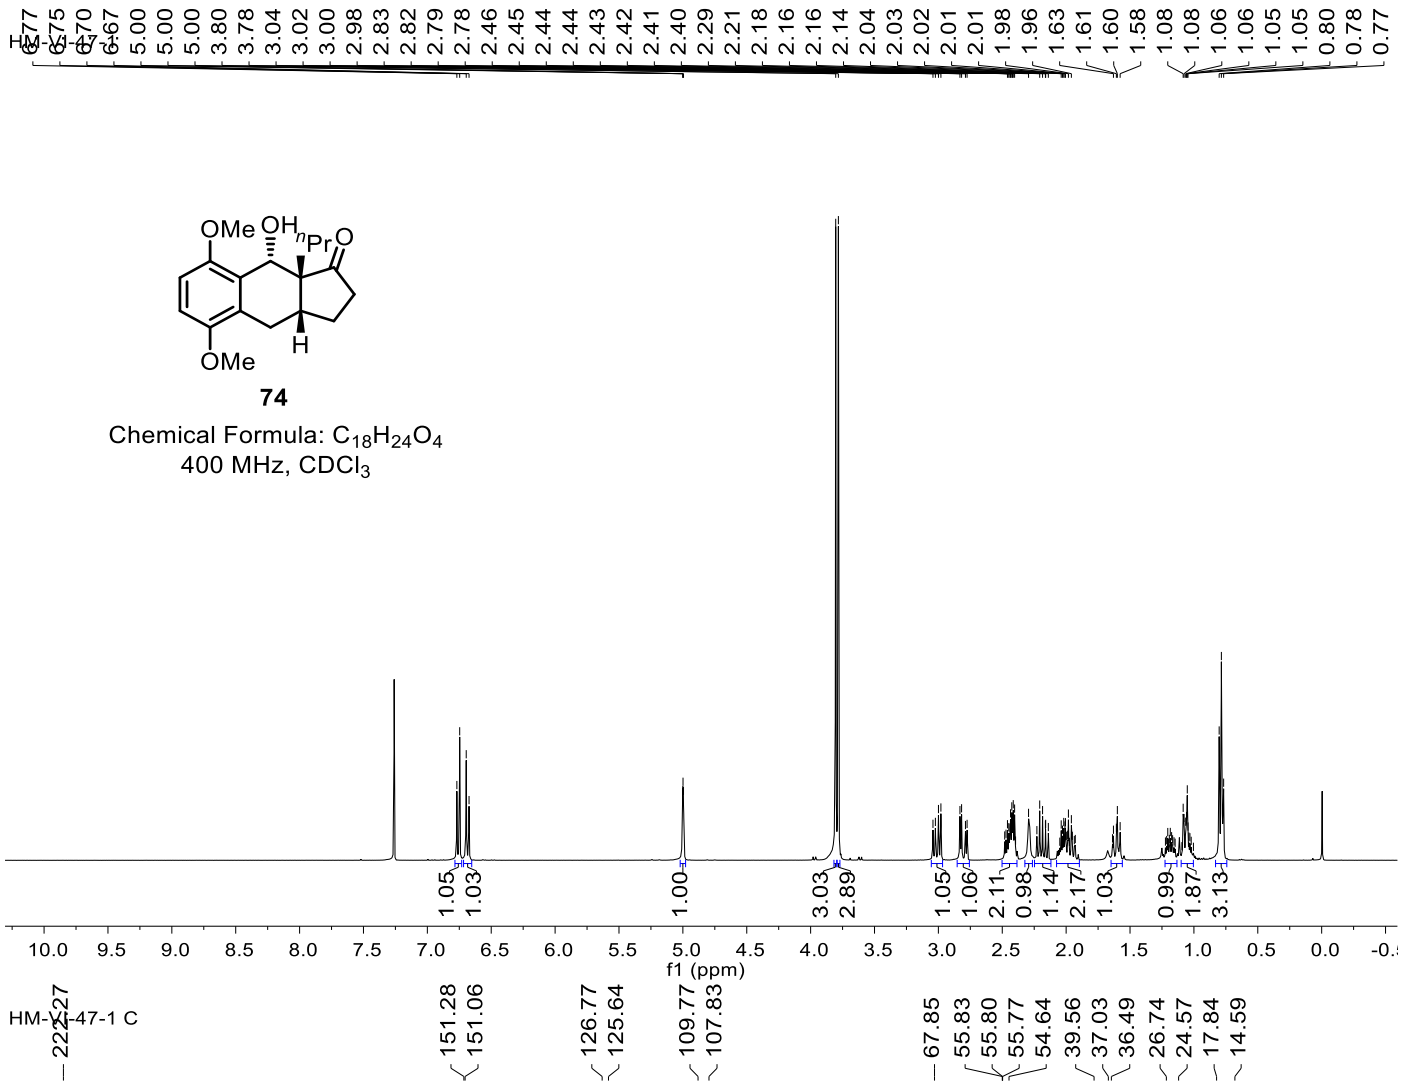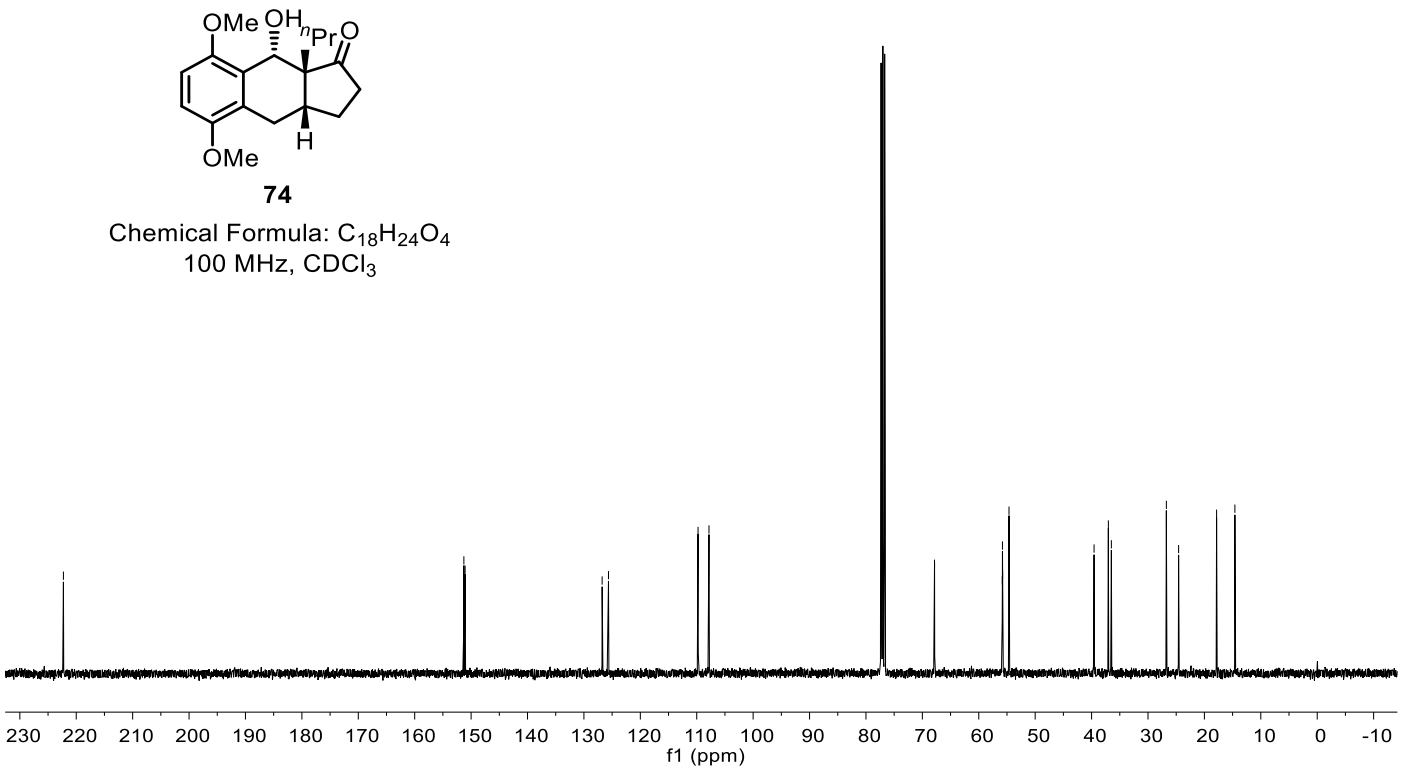

6.70  
6.74  
6.69  
6.67  
5.22  
5.23  
3.80  
3.14  
3.12  
3.10  
3.08  
2.76  
2.74  
2.72  
2.70  
2.50  
2.48  
2.46  
2.46  
2.44  
2.44  
2.42  
2.41  
2.40  
2.26  
2.24  
2.23  
2.22  
2.19  
2.19  
2.17  
2.16  
2.15  
2.08  
2.06  
2.06  
2.05  
2.05  
2.04  
2.04  
2.03  
2.03  
2.02  
2.02  
2.01  
1.91  
1.89  
0.80  
0.79  
0.56  
0.54

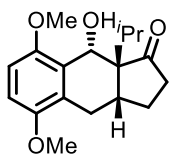

75

Chemical Formula: C<sub>18</sub>H<sub>24</sub>O<sub>4</sub>  
400 MHz, CDCl<sub>3</sub>

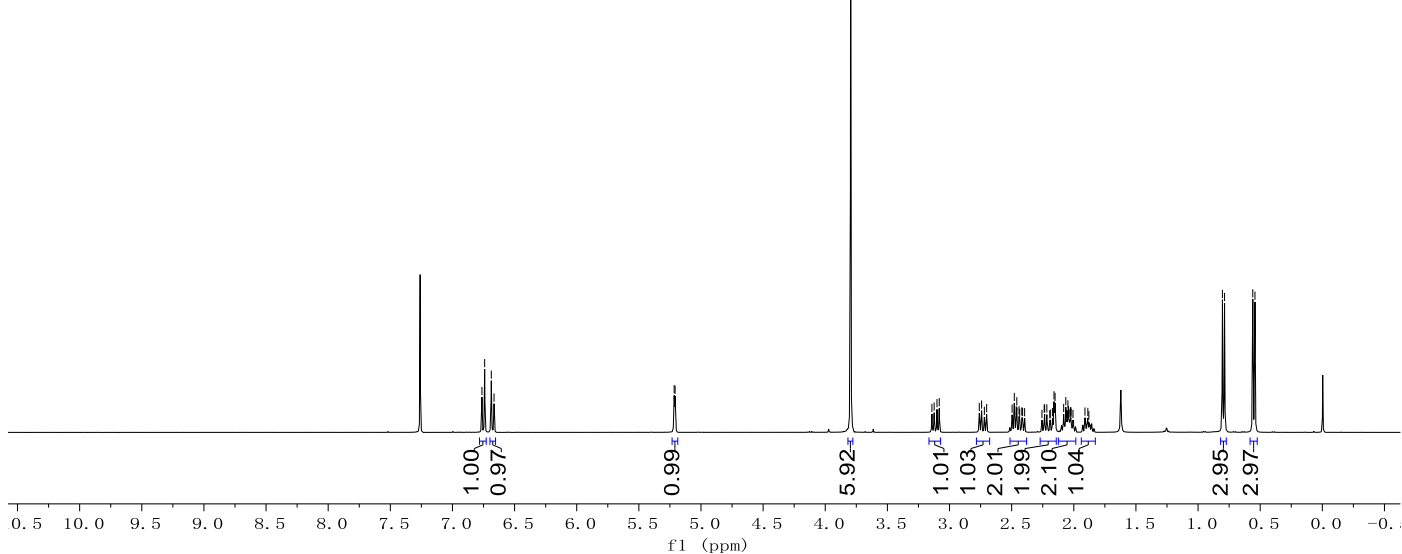

HM-1980.fid

222.98

150.85  
150.35

127.97  
126.81

110.03  
108.02

67.28  
58.72  
55.91  
55.75

39.81  
34.96  
33.77  
27.16  
26.00  
19.03  
17.79

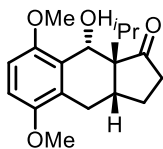

75

Chemical Formula: C<sub>18</sub>H<sub>24</sub>O<sub>4</sub>  
100 MHz, CDCl<sub>3</sub>

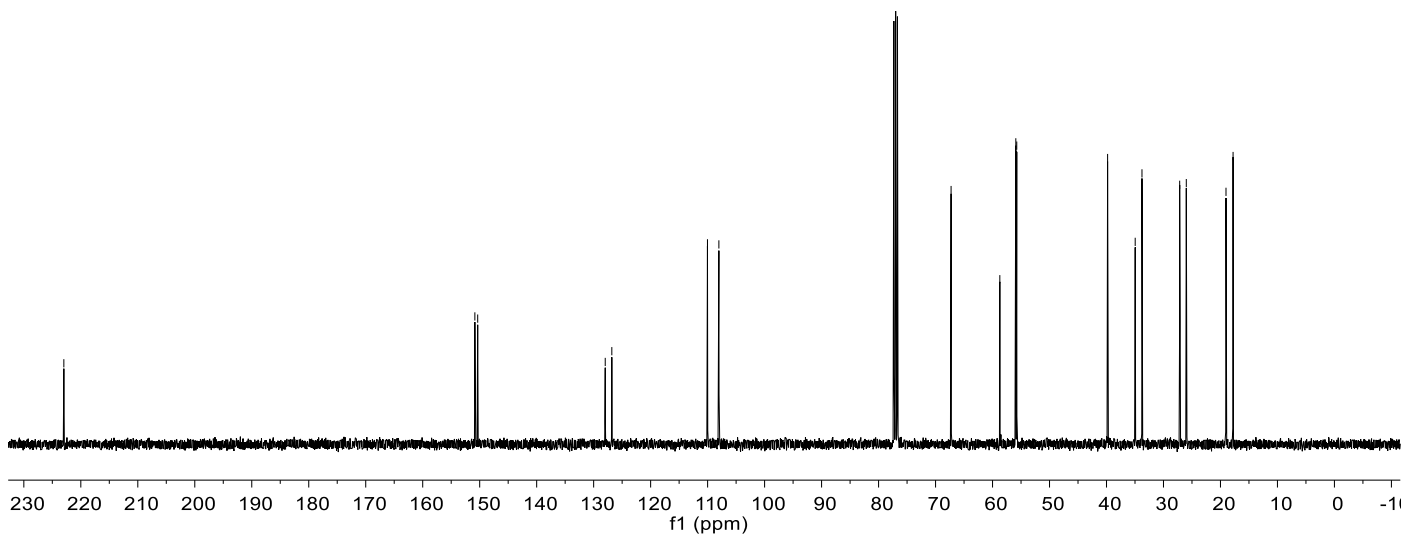

6.77  
6.76  
6.70  
6.68  
5.00  
5.00  
4.97  
4.97  
4.97  
4.95  
4.95  
4.95  
4.94  
4.93  
3.81  
3.79  
2.96  
2.94  
2.93  
2.84  
2.83  
2.49  
2.47  
2.47  
2.46  
2.46  
2.45  
2.45  
2.44  
2.44  
2.43  
2.42  
2.41  
2.38  
2.38  
2.17  
2.17  
2.15  
2.13  
2.01  
2.00  
2.00  
1.99  
1.98  
1.98  
1.96  
1.85  
1.83  
1.82  
1.81  
1.63

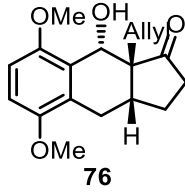

Chemical Formula: C<sub>15</sub>H<sub>17</sub>O<sub>4</sub>  
500 MHz, CDCl<sub>3</sub>

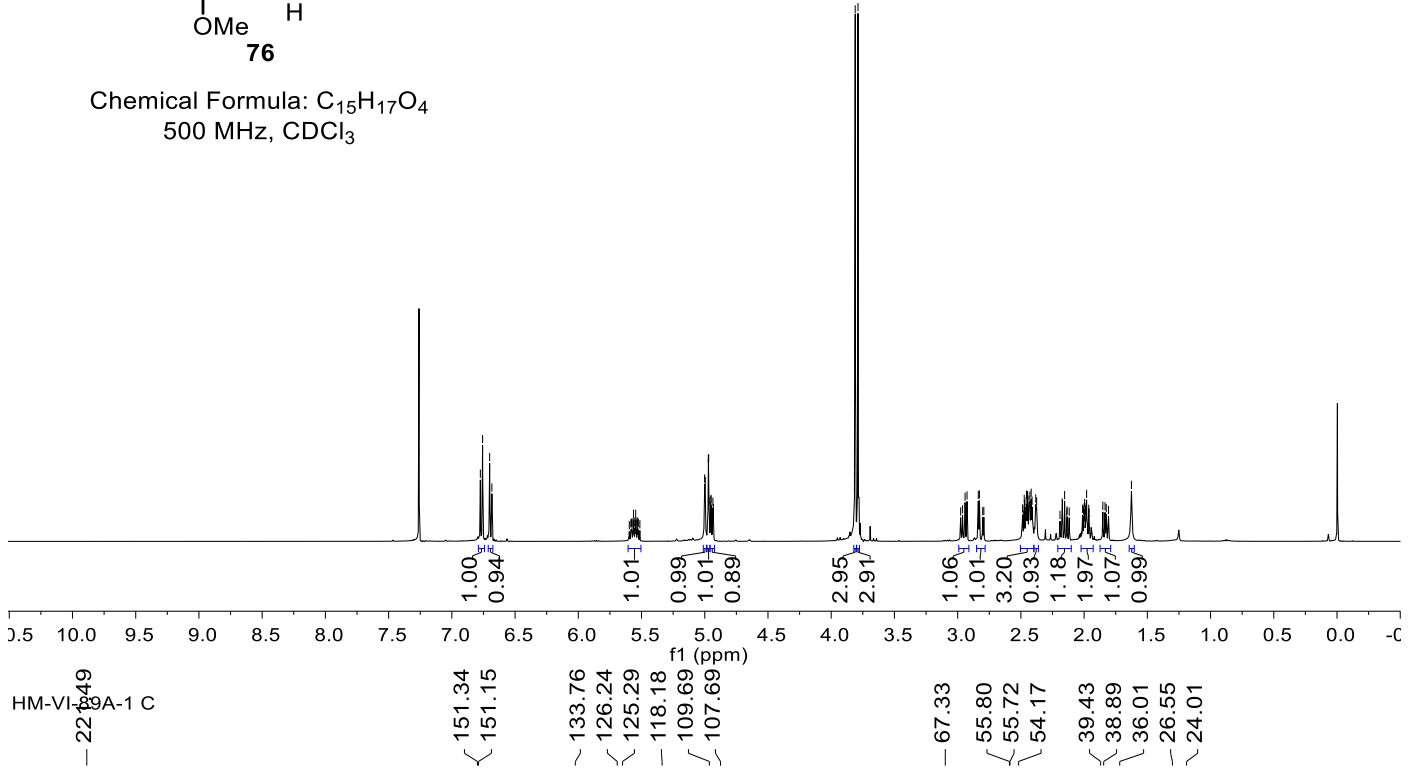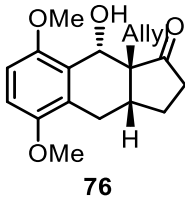

Chemical Formula: C<sub>15</sub>H<sub>17</sub>O<sub>4</sub>  
125 MHz, CDCl<sub>3</sub>

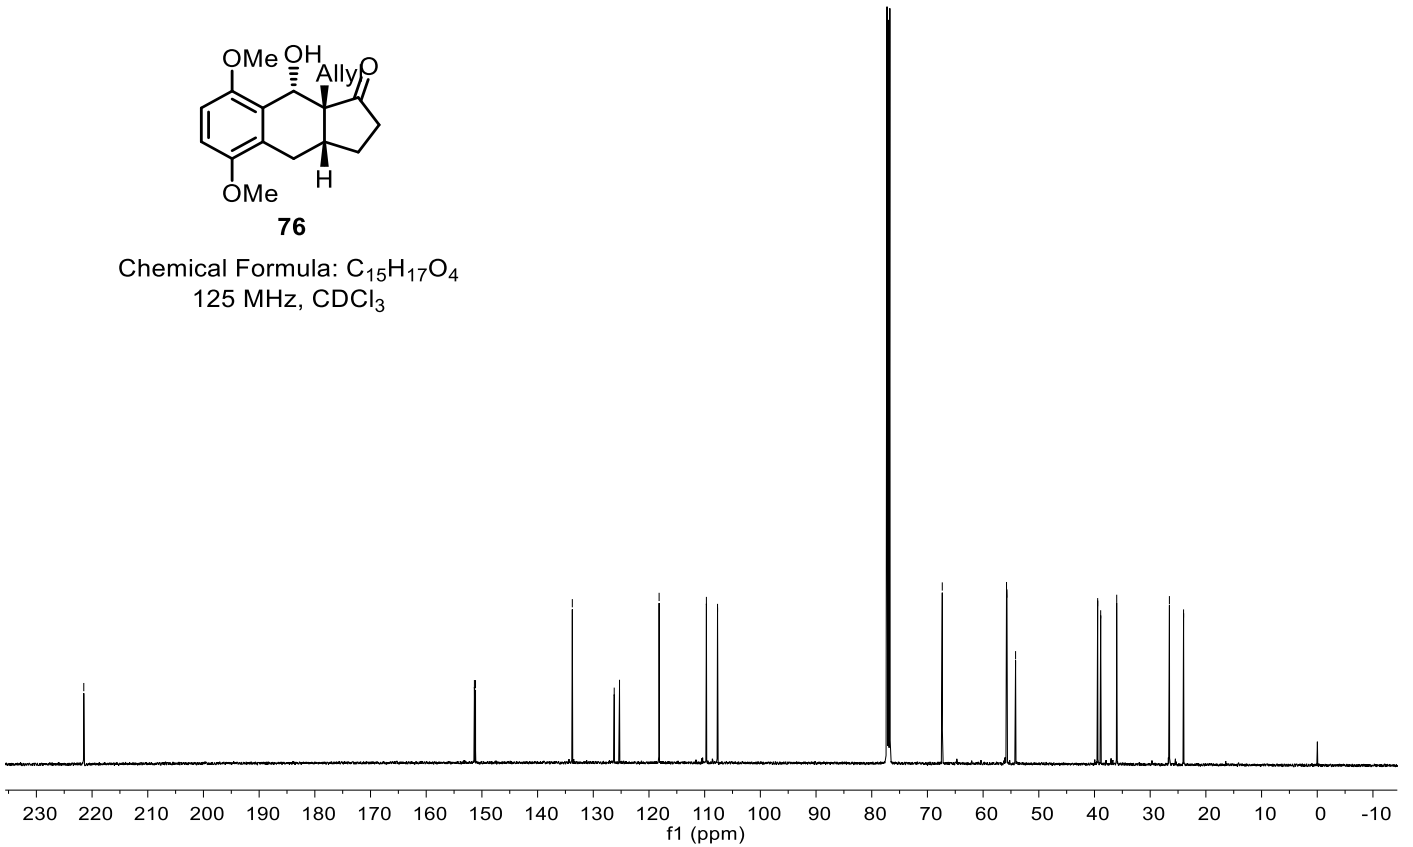

7.26  
7.25  
7.24  
7.23  
7.20  
7.19  
7.19  
7.18  
7.17  
7.17  
7.16  
7.02  
7.01  
7.00  
7.00  
6.84  
6.83  
6.78  
6.76  
5.23  
3.84  
3.28  
3.25  
2.97  
2.95  
2.94  
2.38  
2.37  
2.36  
2.35  
2.35  
2.34  
2.31  
2.30  
2.29  
2.27  
2.26  
2.12  
2.09  
1.90  
1.89  
1.87  
1.85  
1.82  
1.80  
1.79  
1.78  
1.63  
1.62  
1.61  
1.60

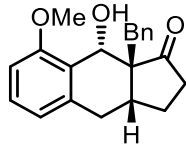

77

Chemical Formula:  $C_{21}H_{22}O_3$   
500 MHz,  $CDCl_3$   
mixture of diastereoisomers  
dr = 10 : 1

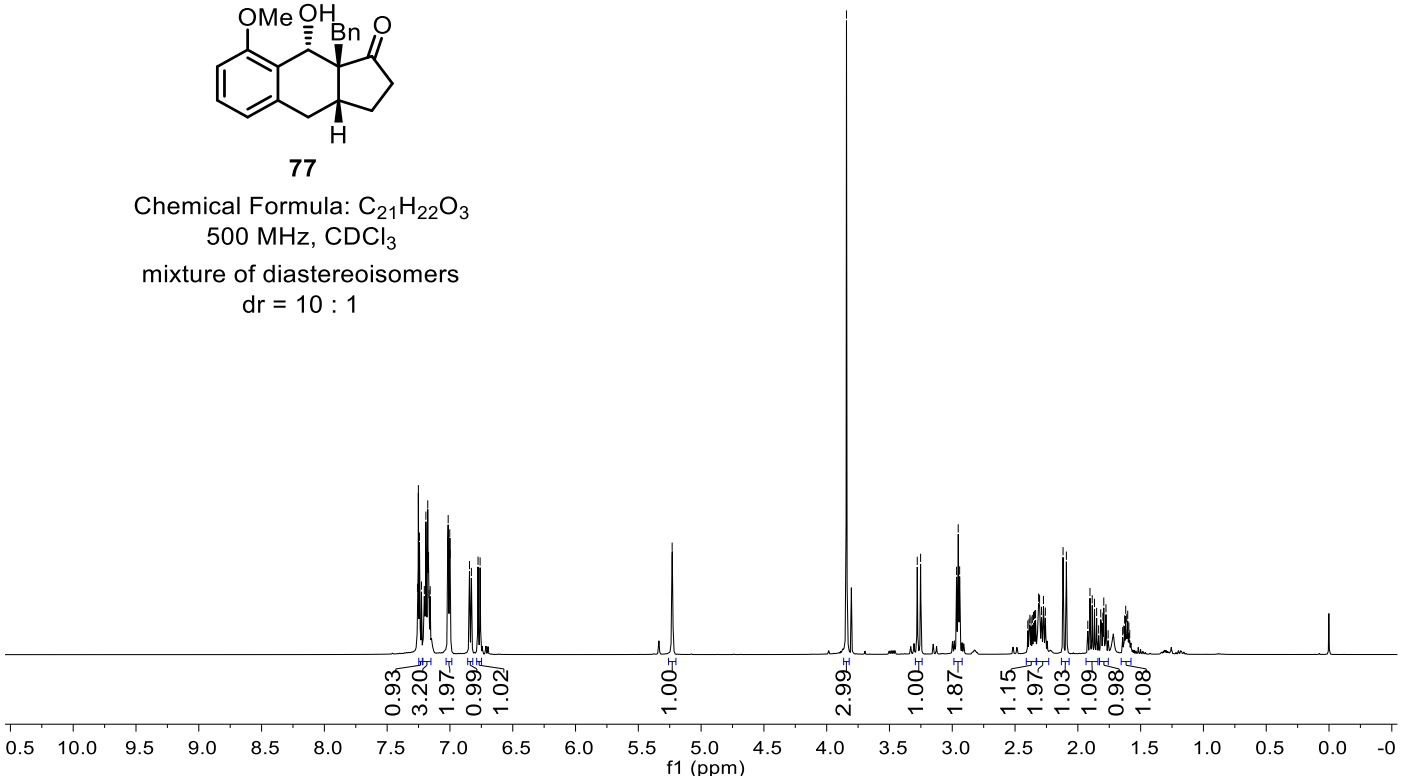

HM-522  
-22.22  
-82A-1 C  
-157.28  
137.54  
137.41  
130.10  
128.99  
128.14  
126.40  
125.09  
121.05  
108.16  
-67.66  
56.98  
55.44  
40.66  
39.75  
35.97  
31.37  
26.51

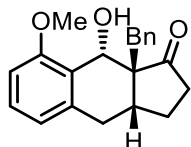

77

Chemical Formula:  $C_{21}H_{22}O_3$   
125 MHz,  $CDCl_3$   
mixture of diastereoisomers  
dr = 10 : 1

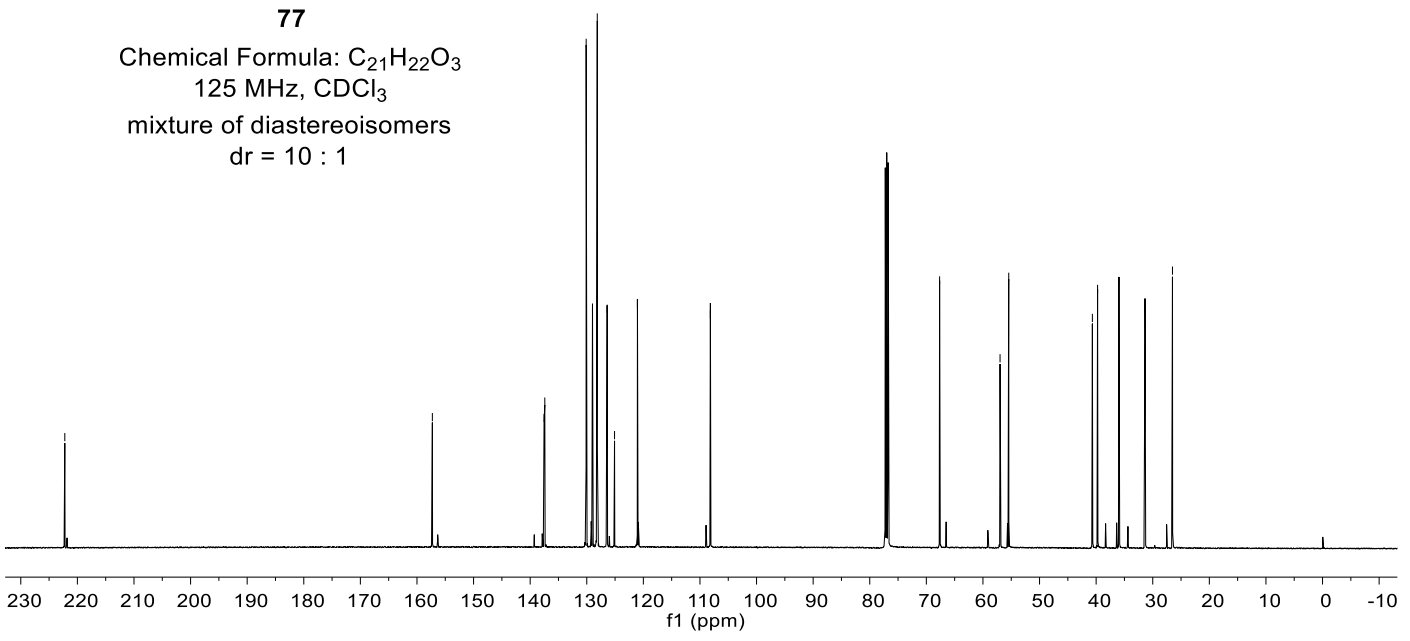

7.21  
7.20  
7.20  
7.18  
7.17  
7.17  
7.16  
7.02  
7.01  
6.37  
6.36  
6.35  
6.35  
5.14  
3.83  
3.82  
3.28  
3.25  
2.93  
2.93  
2.92  
2.40  
2.39  
2.38  
2.38  
2.37  
2.36  
2.35  
2.34  
2.27  
2.26  
2.24  
2.16  
2.12  
2.10  
1.92  
1.90  
1.88  
1.86  
1.85  
1.82  
1.81  
1.80  
1.78  
1.63  
1.62  
1.61  
1.60  
1.59

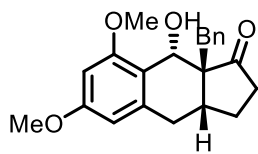

Chemical Formula: C<sub>22</sub>H<sub>24</sub>O<sub>4</sub>

500 MHz, CDCl<sub>3</sub>

mixture of diastereoisomers

dr = 5 : 1

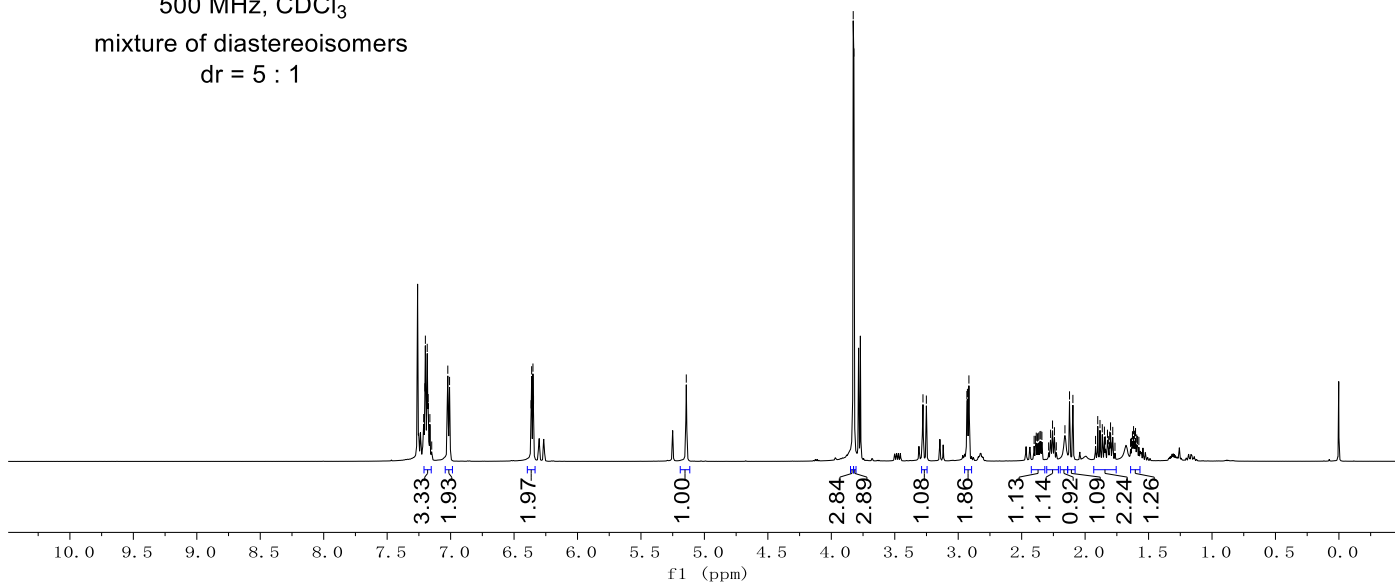

222.28

160.44  
158.50

138.46  
137.53  
130.12  
128.16  
126.39  
117.86

104.63  
96.33

67.60  
57.05  
55.46  
55.30  
40.67  
39.75  
36.04  
31.84  
26.57

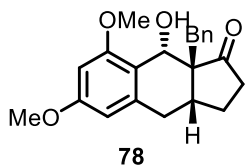

Chemical Formula: C<sub>22</sub>H<sub>24</sub>O<sub>4</sub>

125 MHz, CDCl<sub>3</sub>

mixture of diastereoisomers

dr = 5 : 1

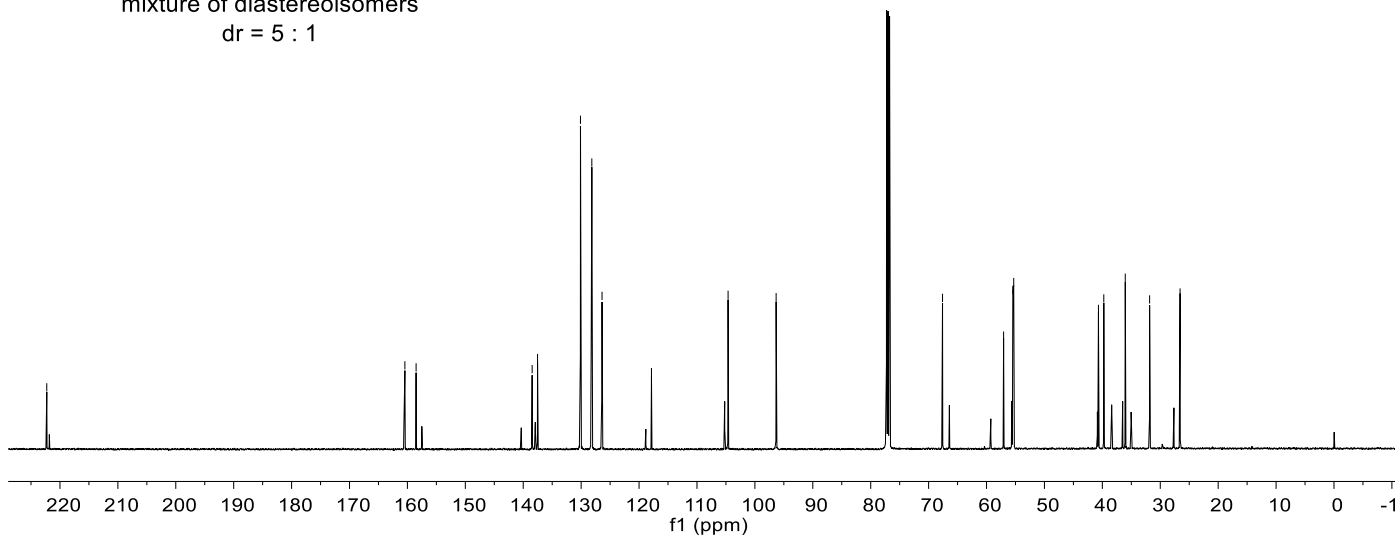

7.23  
7.20  
7.20  
7.19  
7.19  
7.18  
7.18  
7.17  
7.17  
7.16  
7.01  
7.00  
7.00  
6.99  
6.98  
6.98  
6.42  
5.18  
5.17  
3.91  
3.85  
3.78  
3.24  
3.21  
3.16  
3.14  
3.12  
3.10  
2.82  
2.80  
2.78  
2.76  
2.35  
2.34  
2.33  
2.28  
2.26  
2.24  
2.11  
2.10  
2.08  
1.91  
1.89  
1.87  
1.84  
1.82  
1.79  
1.77  
1.64  
1.63

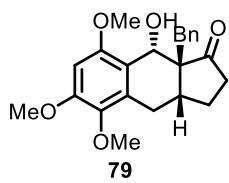

Chemical Formula: C<sub>23</sub>H<sub>26</sub>O<sub>5</sub>

400 MHz, CDCl<sub>3</sub>

mixture of diastereoisomers

dr = 9 : 1

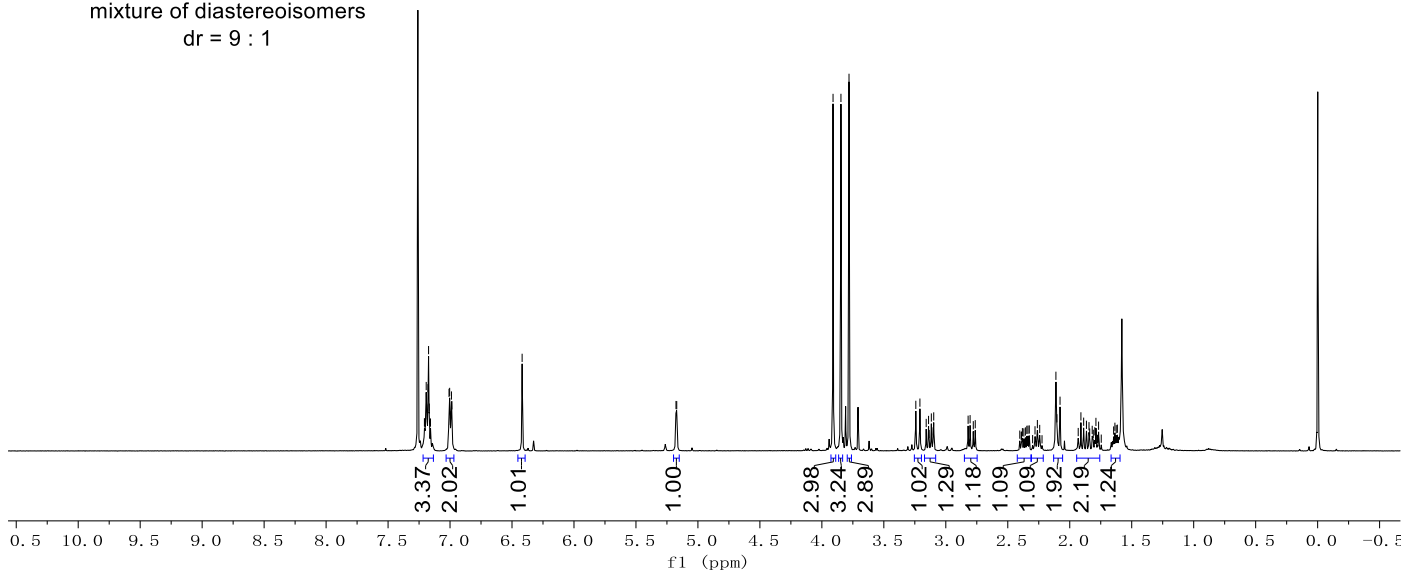

III-41.11.fid

222.41  
153.98  
152.95  
140.32  
137.43  
131.10  
130.14  
128.19  
126.45  
117.73  
94.73  
67.80  
60.68  
56.84  
55.95  
40.87  
39.77  
35.77  
26.85  
25.04

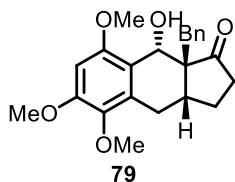

Chemical Formula: C<sub>23</sub>H<sub>26</sub>O<sub>5</sub>

100 MHz, CDCl<sub>3</sub>

mixture of diastereoisomers

dr = 9 : 1

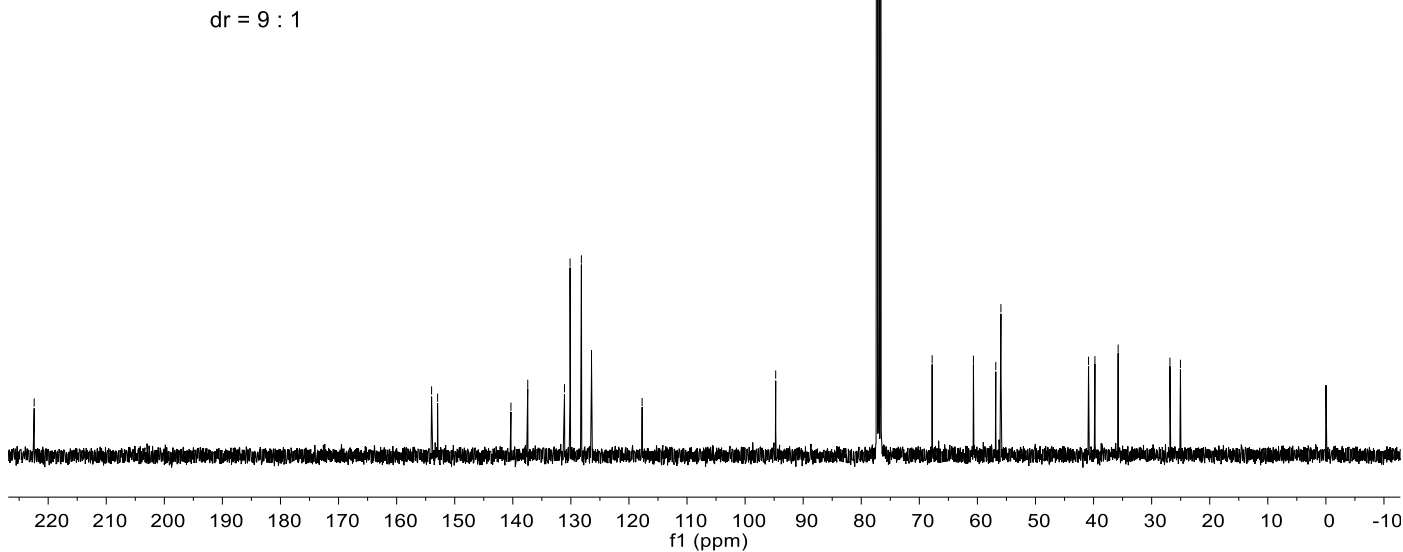

7.20  
7.20  
7.19  
7.19  
7.18  
7.18  
7.17  
7.16  
7.06  
7.06  
7.05  
7.05  
7.04  
7.04  
6.80  
6.78  
6.73  
6.71  
5.08  
5.07  
3.83  
3.82  
3.34  
3.31  
2.99  
2.98  
2.95  
2.93  
2.82  
2.81  
2.78  
2.77  
2.44  
2.43  
2.38  
2.35  
2.34  
2.18  
2.18  
2.14  
1.91  
1.90  
1.90  
1.90  
1.89  
1.89  
1.87  
1.87  
1.85  
1.71  
1.69

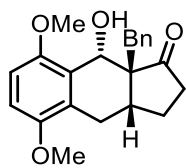

**80**

Chemical Formula:  $C_{22}H_{24}O_4$

400 MHz,  $CDCl_3$

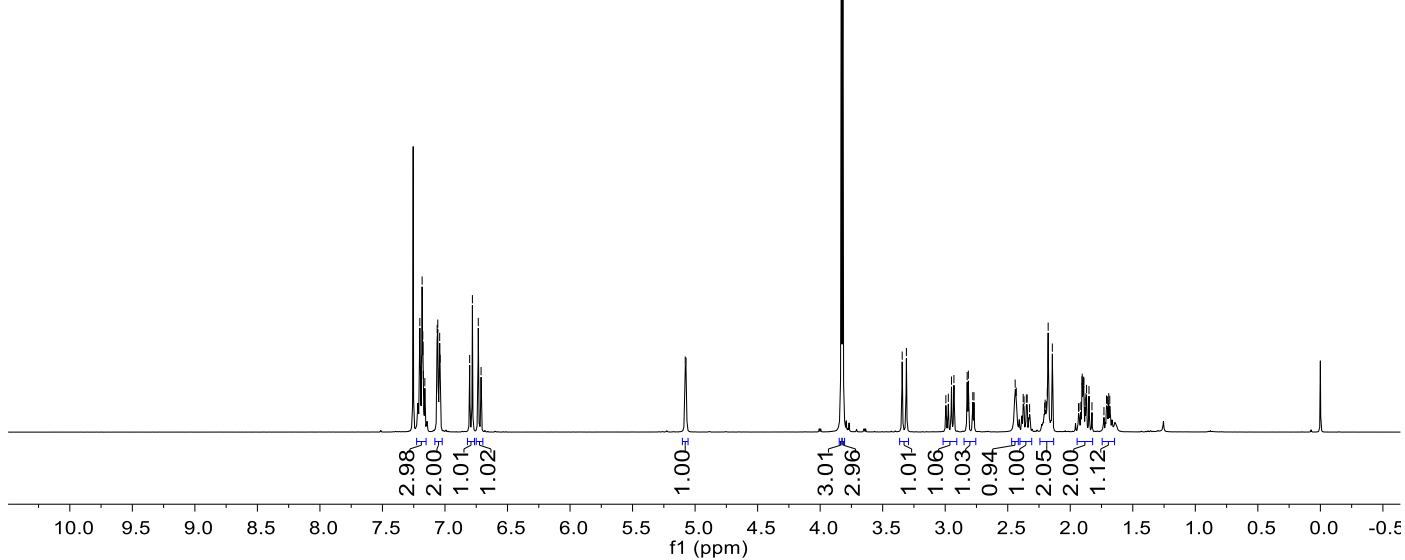

HM-V-48-1 C  
-221.86

151.56  
151.29  
137.70  
130.14  
128.16  
126.37  
125.98  
124.97  
109.65  
107.68  
67.63  
67.61  
55.80  
55.77  
55.74  
55.71  
55.67  
39.68  
39.60  
34.49  
26.52  
23.89

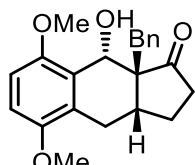

**80**

Chemical Formula:  $C_{22}H_{24}O_4$

100 MHz,  $CDCl_3$

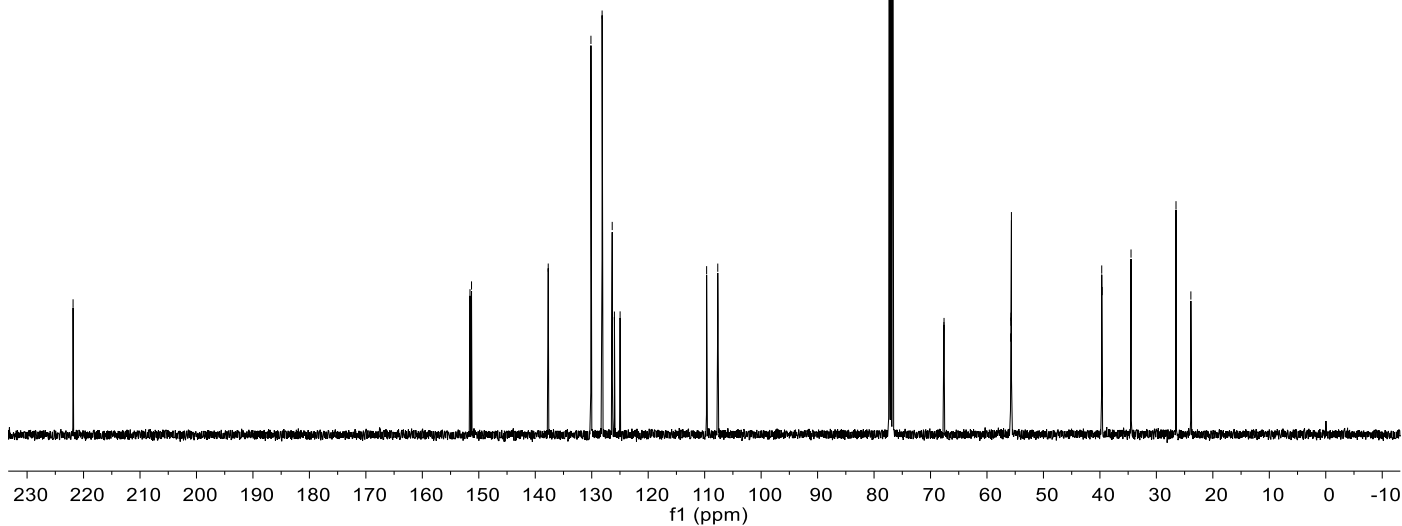

HM-V-01386  
99A-1

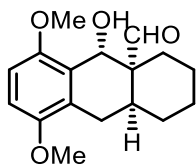

81

Chemical Formula: C<sub>17</sub>H<sub>22</sub>O<sub>4</sub>  
400 MHz, CDCl<sub>3</sub>

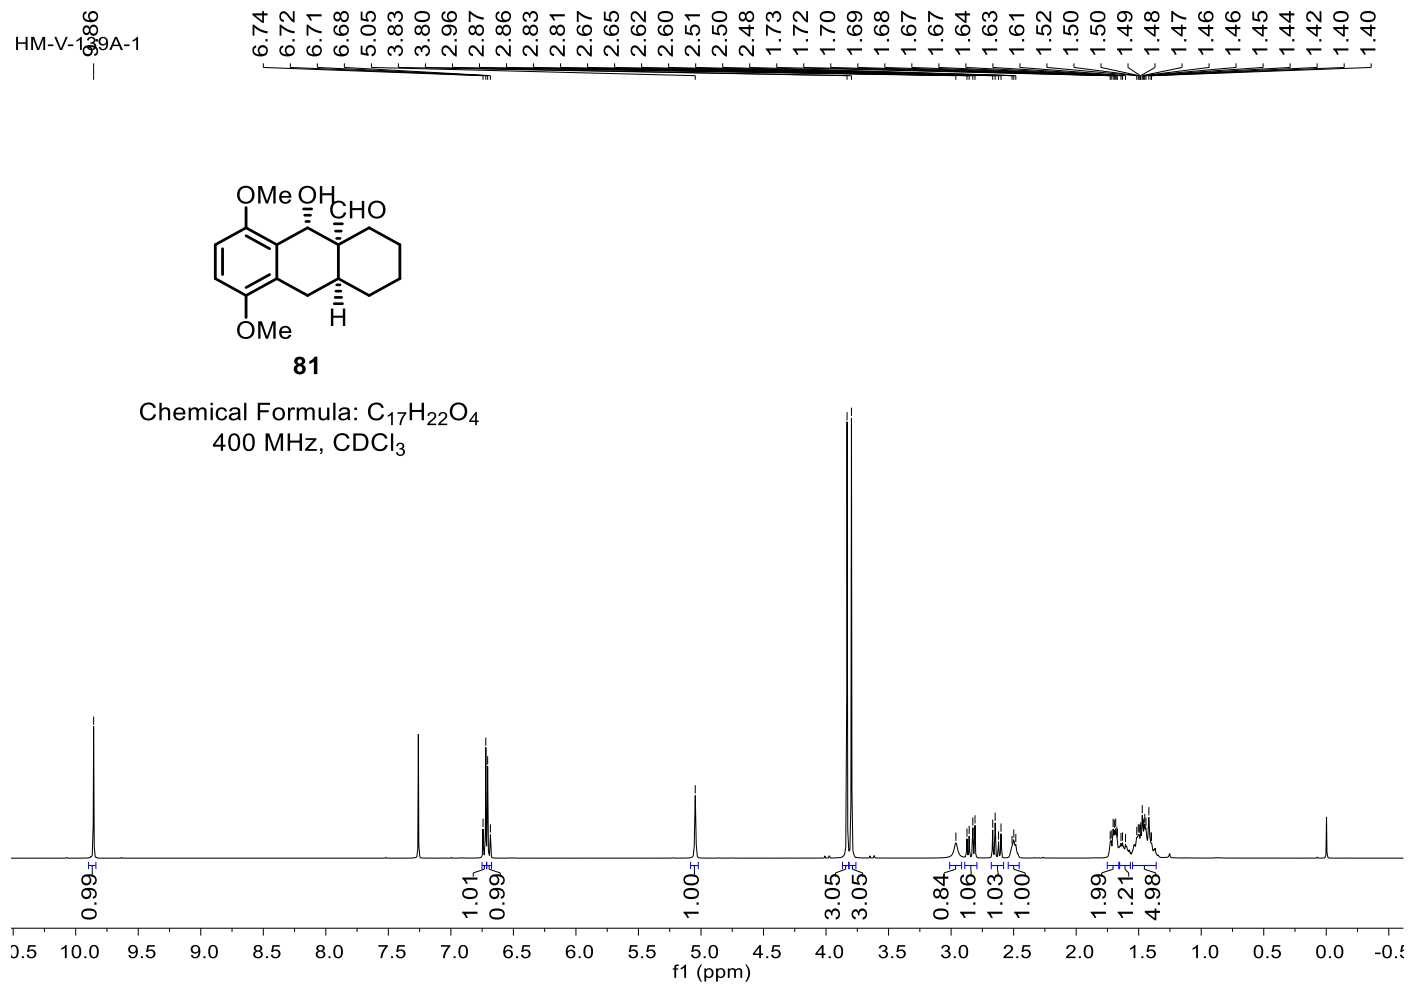

HM-V-01386  
99A-1 C

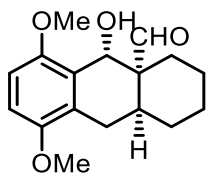

81

Chemical Formula: C<sub>17</sub>H<sub>22</sub>O<sub>4</sub>  
100 MHz, CDCl<sub>3</sub>

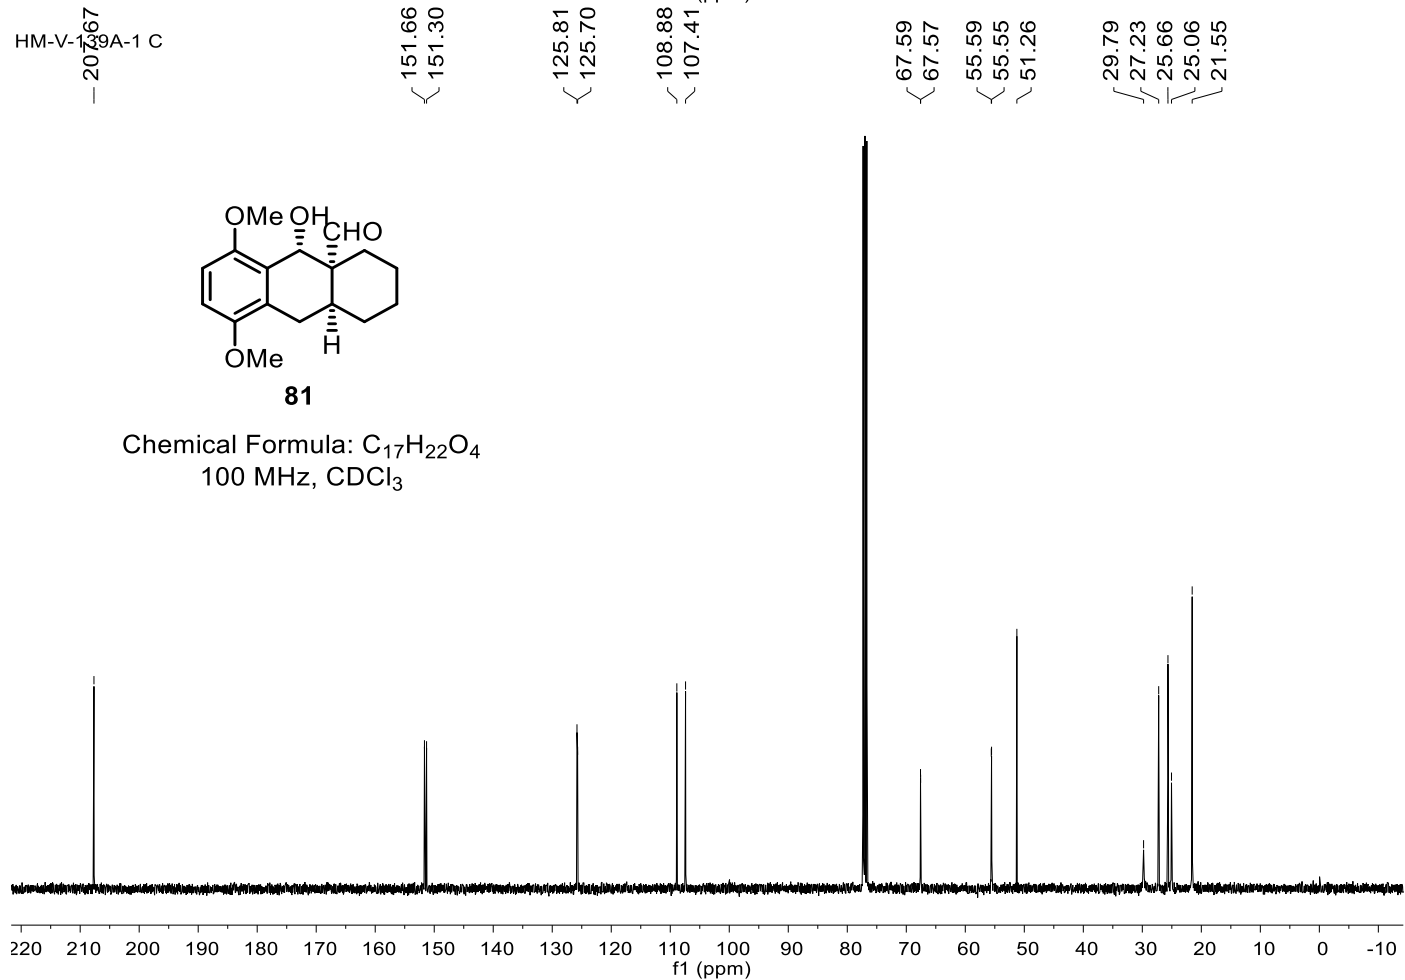



6.79  
6.80  
6.78  
6.72  
6.70  
5.44  
3.81  
3.78  
2.96  
2.95  
2.94  
2.87  
2.86  
2.85  
2.43  
1.98  
1.98  
1.97  
1.97  
1.96  
1.96  
1.95  
1.95  
1.94  
1.94  
1.93  
1.92  
1.42  
1.42  
1.41  
1.41  
1.40  
1.39  
1.28  
1.27  
1.26  
1.25  
1.12  
1.12  
1.11  
1.11  
1.10  
1.10  
1.09  
1.09  
1.08  
1.08  
1.07  
1.06

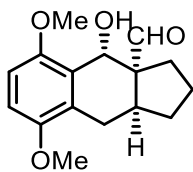

**82**

Chemical Formula: C<sub>16</sub>H<sub>20</sub>O<sub>4</sub>  
500 MHz, CDCl<sub>3</sub>

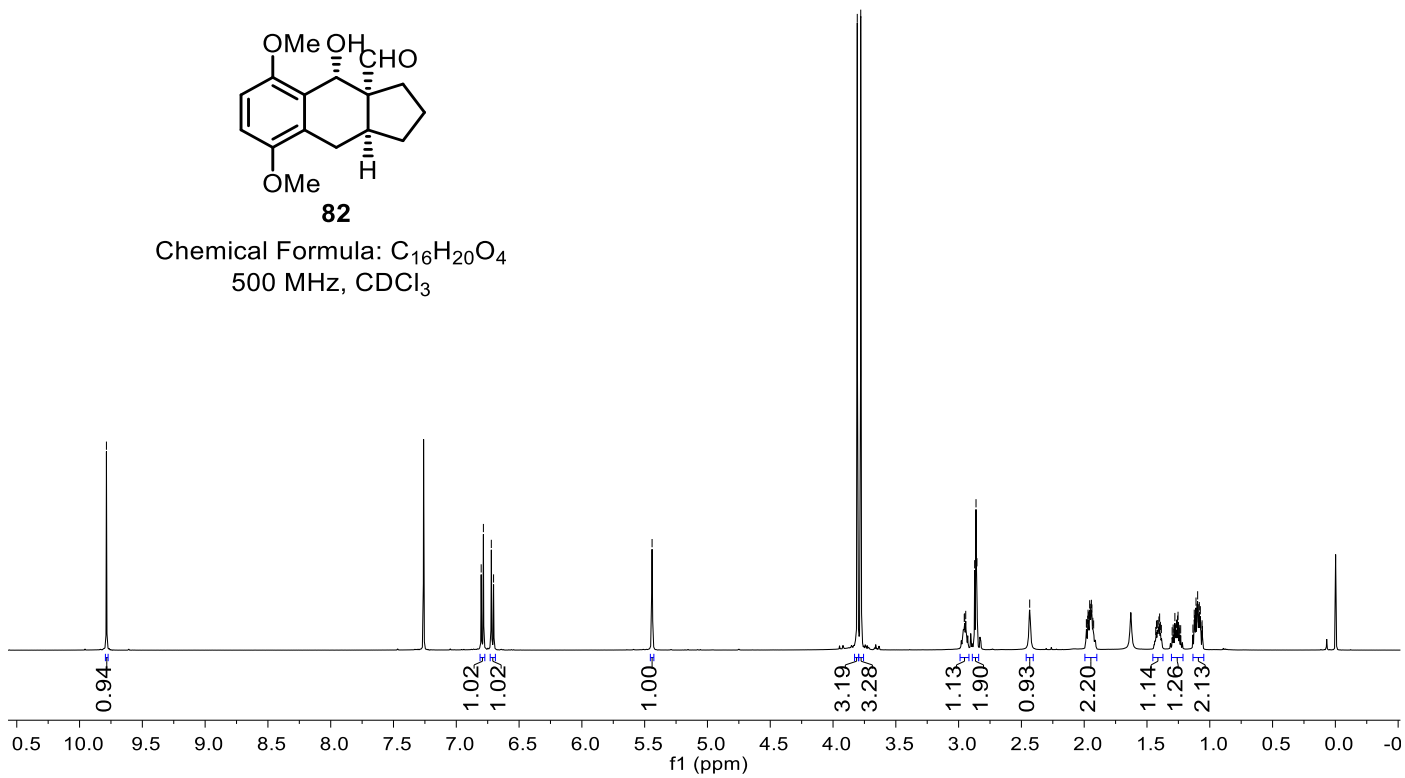

HM-136-1 C  
-203.94

151.74  
151.29  
128.21  
126.41  
110.99  
108.46  
65.87  
61.36  
56.22  
56.04  
34.33  
34.03  
32.97  
24.52  
23.55

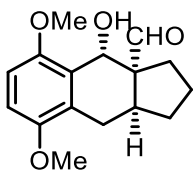

**82**

Chemical Formula: C<sub>16</sub>H<sub>20</sub>O<sub>4</sub>  
125 MHz, CDCl<sub>3</sub>

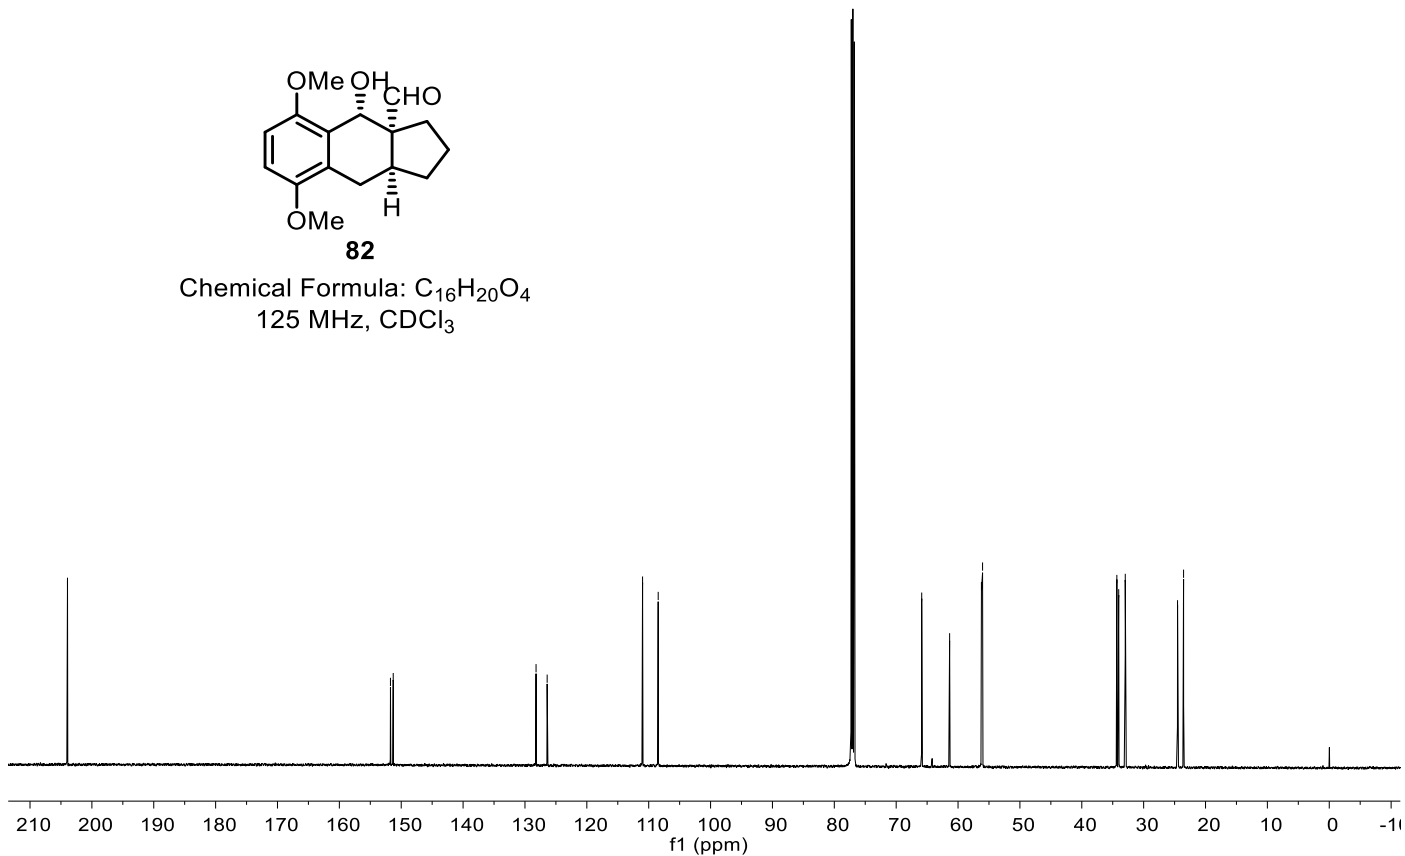

7.79  
6.77  
6.70  
6.68  
5.52  
5.52  
5.52  
3.80  
3.77  
3.27  
3.27  
3.26  
3.25  
2.88  
2.88  
2.85  
2.84  
2.82  
2.80  
2.79  
2.77  
2.38  
2.04  
2.03  
1.94  
1.94  
1.93  
1.93  
1.92  
1.92  
1.91  
1.91  
1.90  
1.29  
1.29  
1.28  
1.27  
1.20  
1.19  
1.18  
1.17  
1.16  
1.16  
1.15  
1.15  
1.14  
1.12  
1.00  
0.99

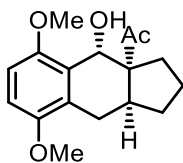

83

Chemical Formula: C<sub>17</sub>H<sub>22</sub>O<sub>4</sub>  
500 MHz, CDCl<sub>3</sub>

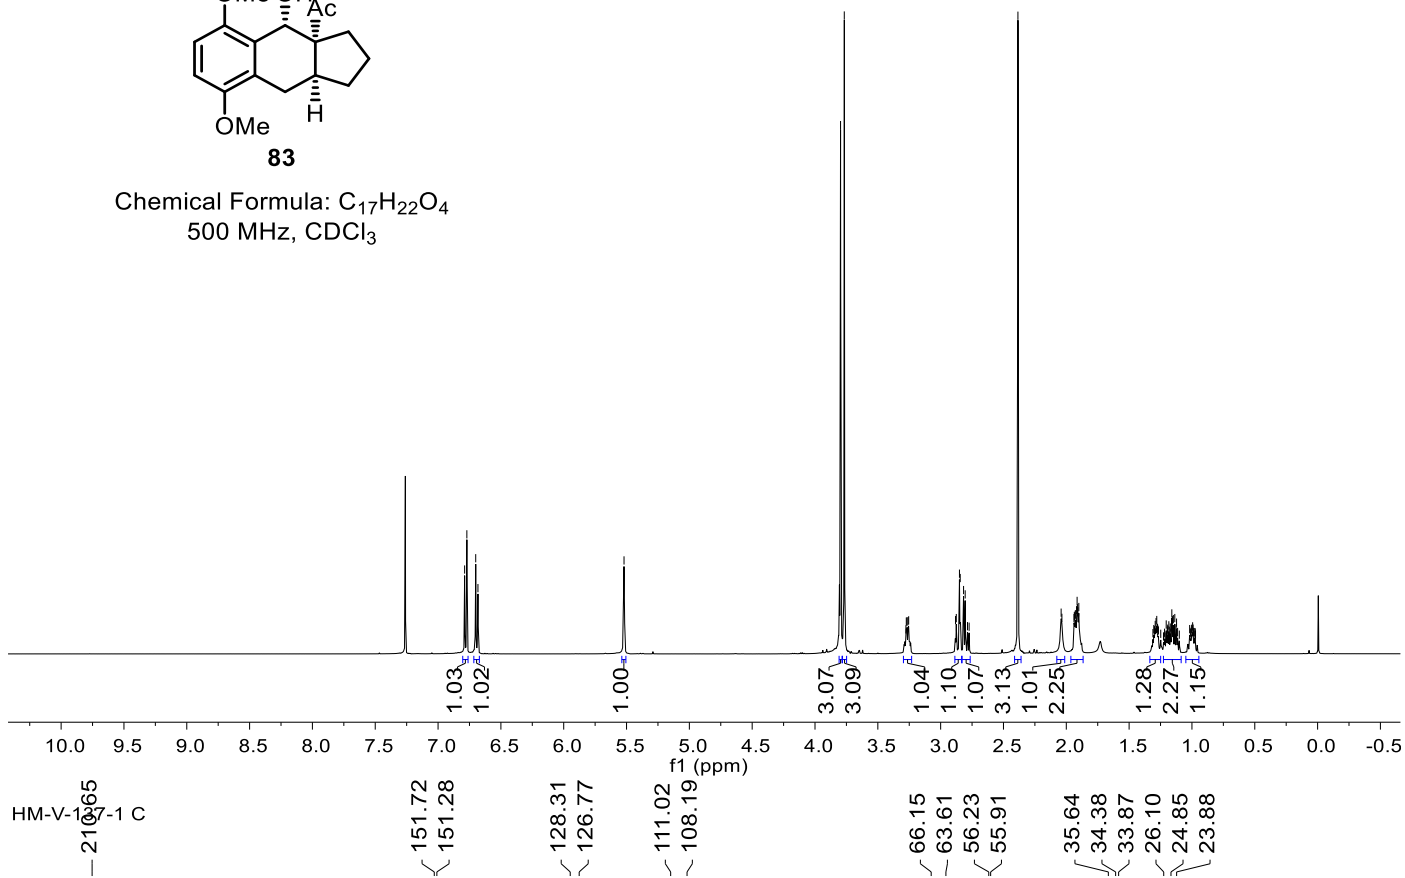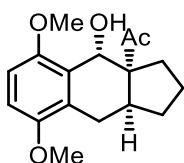

83

Chemical Formula: C<sub>17</sub>H<sub>22</sub>O<sub>4</sub>  
500 MHz, CDCl<sub>3</sub>

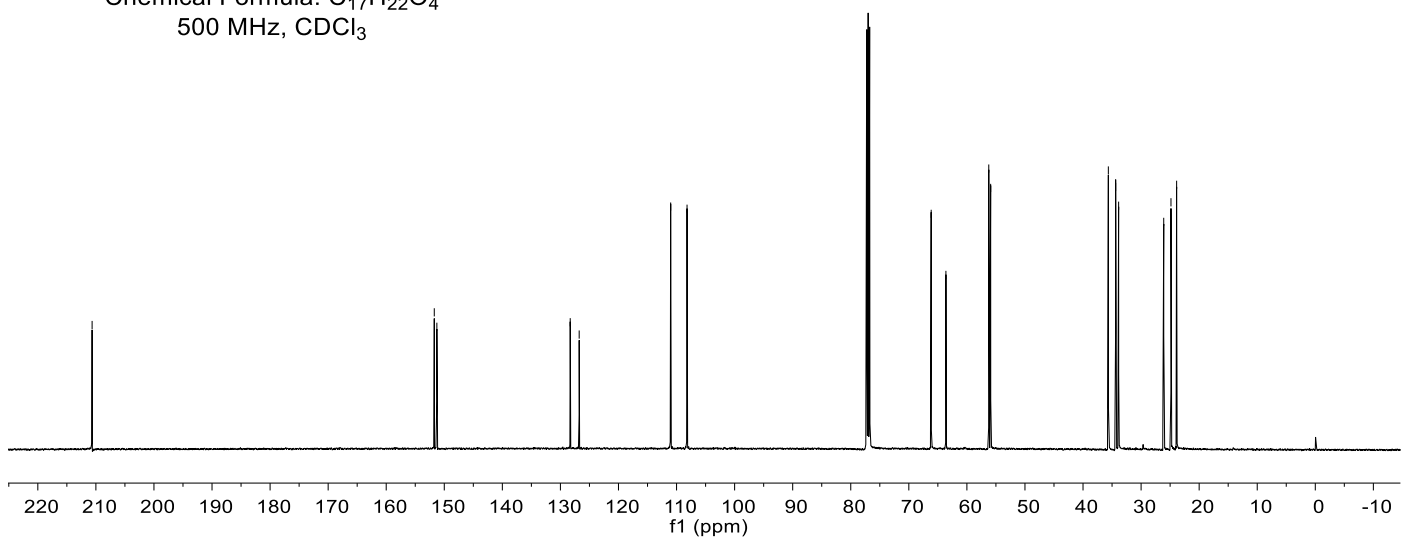

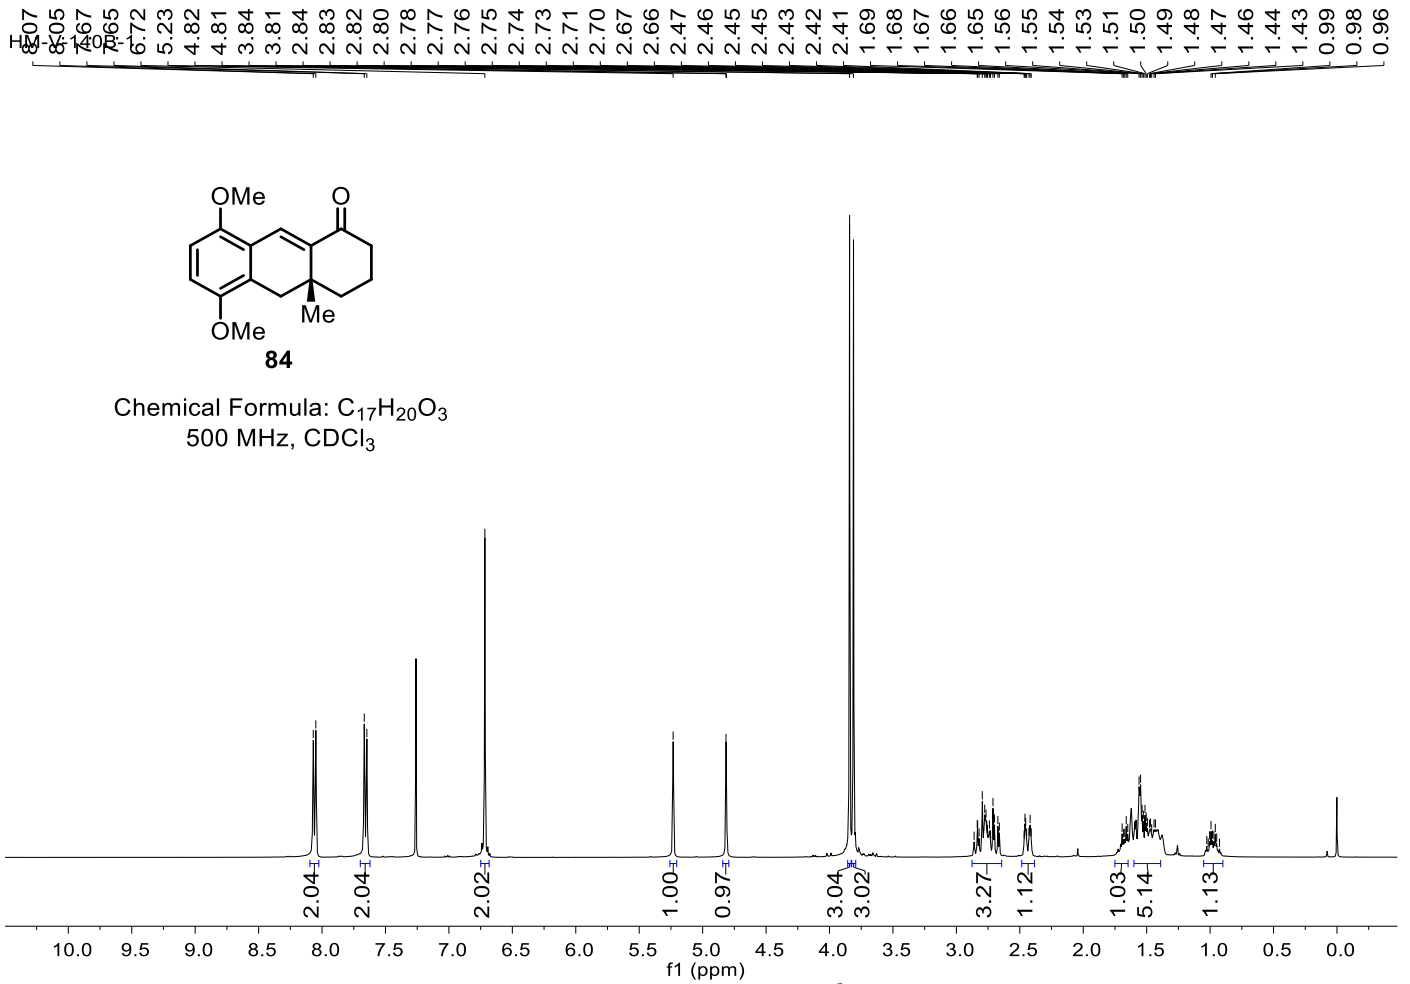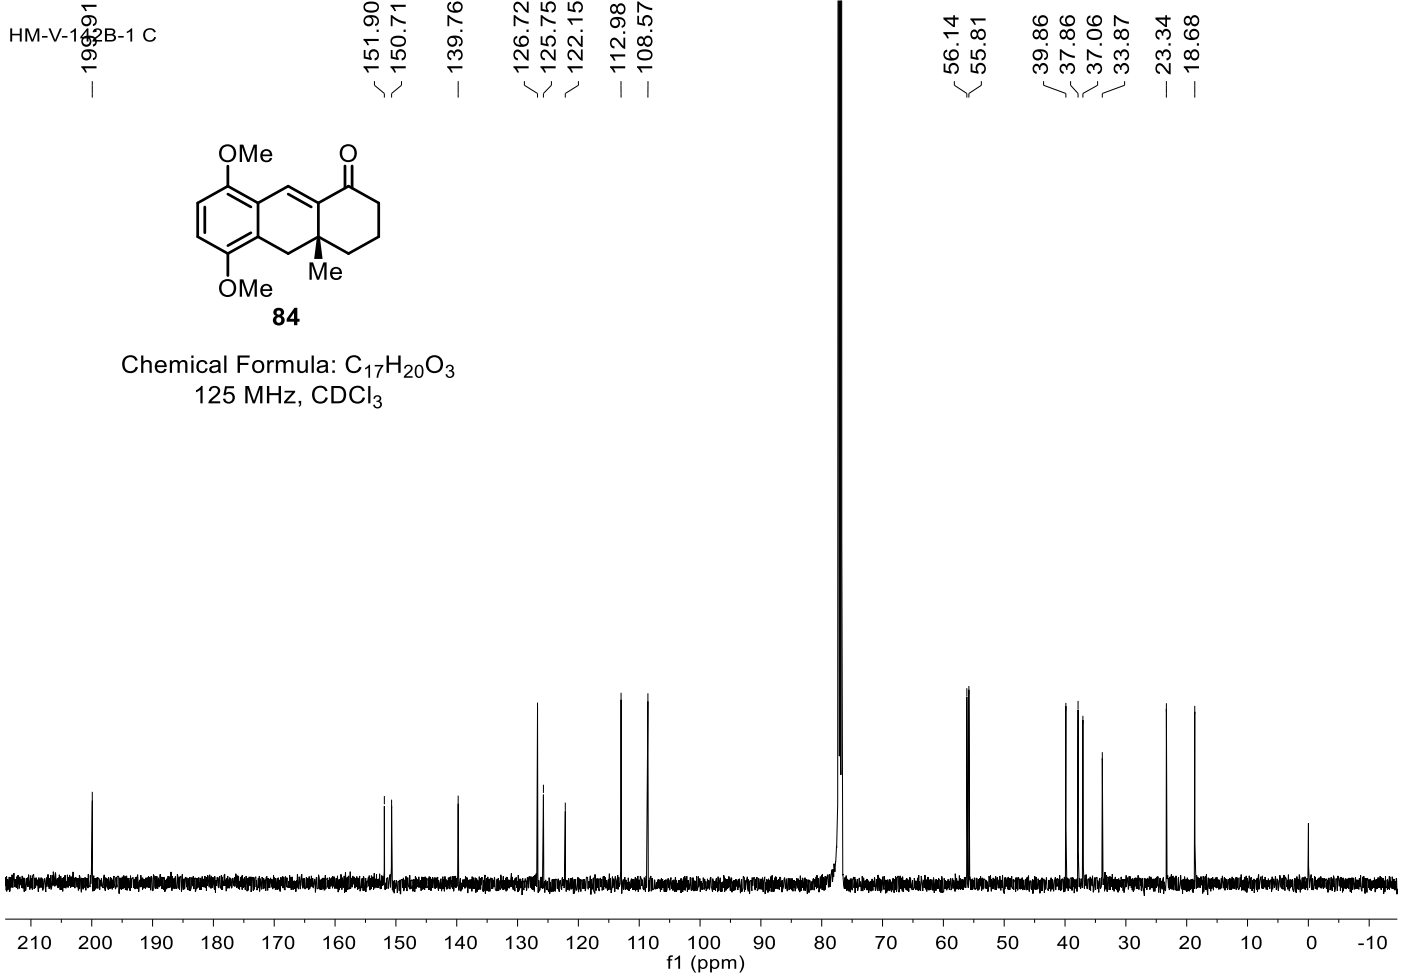

HM-VI-25-1

7.75  
6.82  
6.80  
6.68  
6.66

3.80  
3.79  
3.06  
3.02  
2.63  
2.58  
2.38  
2.34  
2.31  
2.31  
2.27  
2.27  
1.74  
1.73  
1.08  
1.06  
1.05

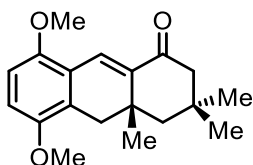

**85**

Chemical Formula: C<sub>19</sub>H<sub>24</sub>O<sub>3</sub>  
400 MHz, CDCl<sub>3</sub>

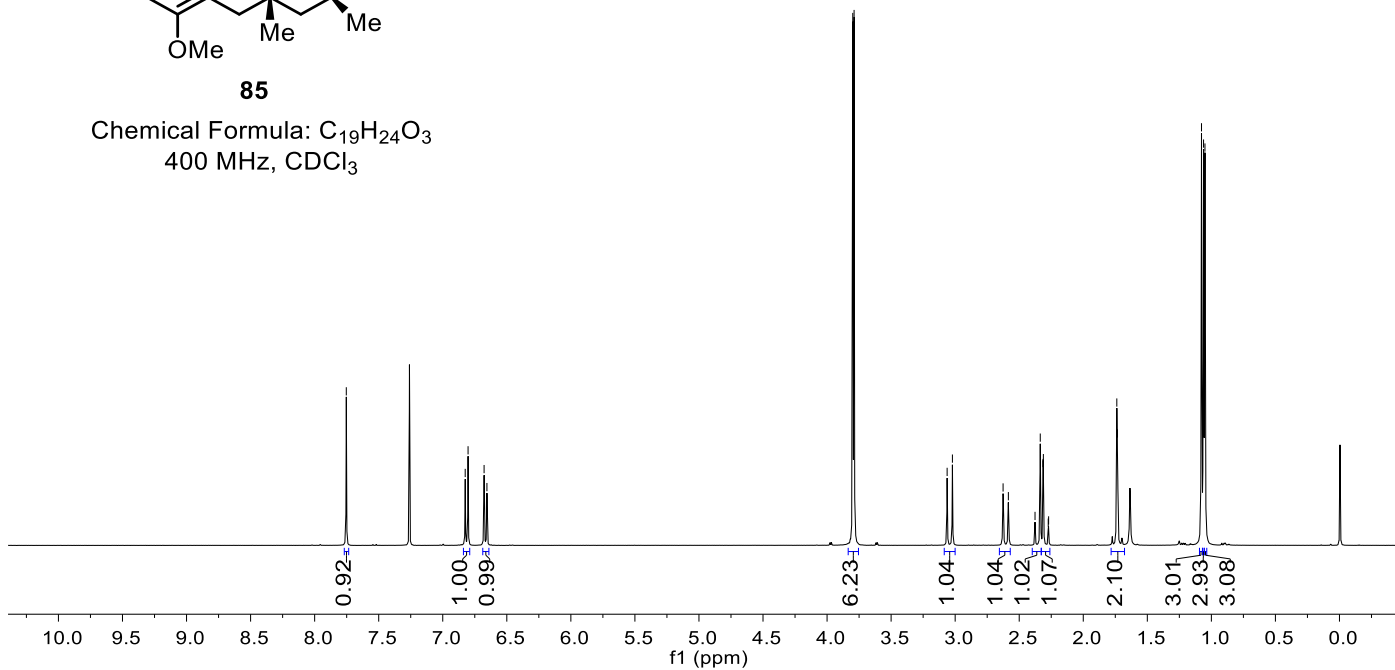

HM-VI-25-1 C  
200.660

151.86  
150.76  
138.98  
126.62  
126.59  
125.91  
122.30  
112.99  
112.97  
108.64  
108.62

56.14  
56.11  
55.84  
55.81  
52.77  
52.74  
51.31  
51.29  
38.46  
32.70  
32.18  
30.88  
30.86  
29.66  
29.64  
27.59  
27.56

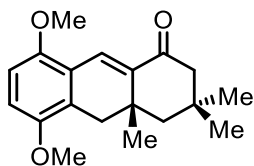

**85**

Chemical Formula: C<sub>19</sub>H<sub>24</sub>O<sub>3</sub>  
125 MHz, CDCl<sub>3</sub>

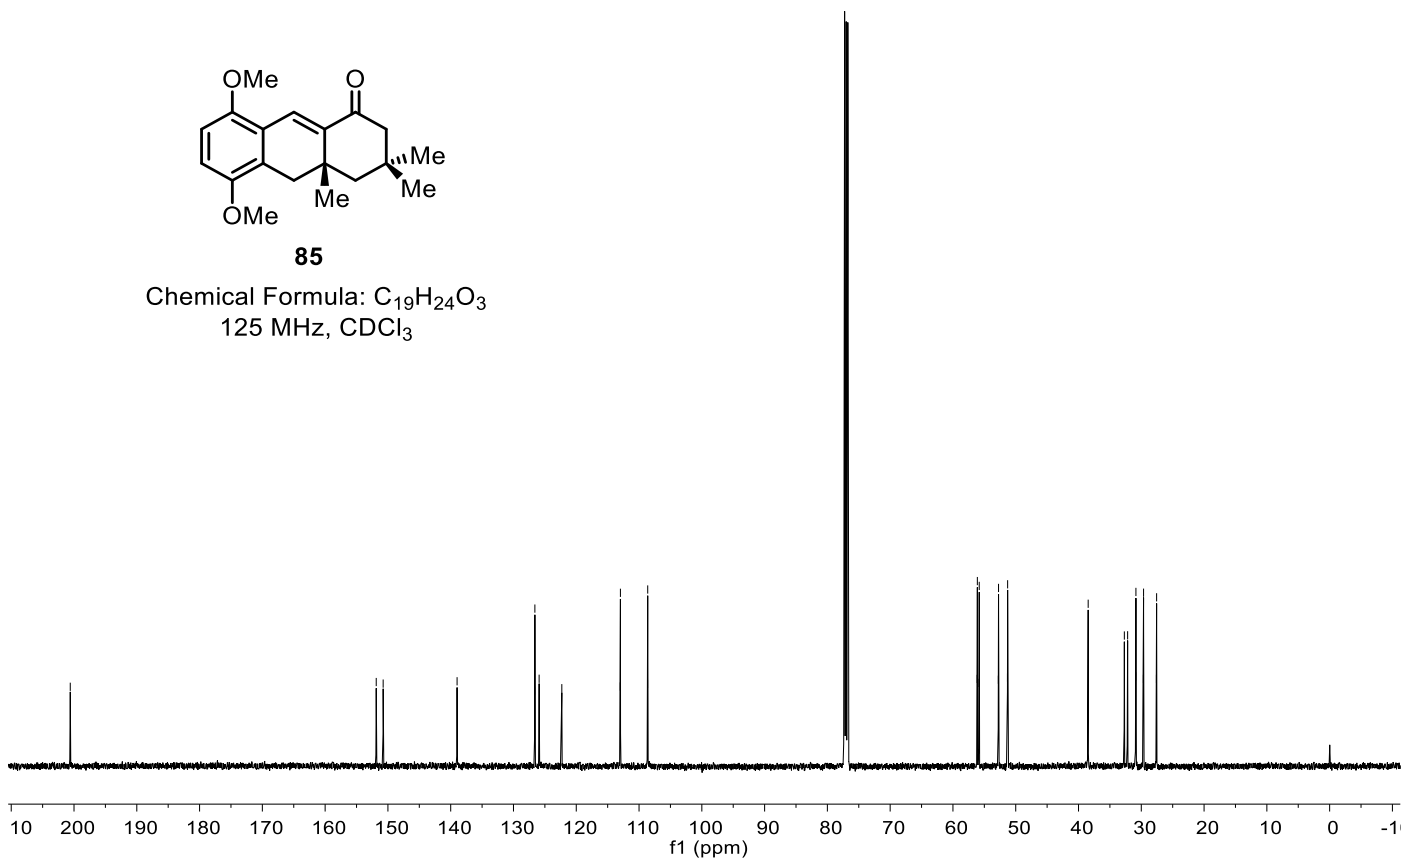

HM-V-143B-1

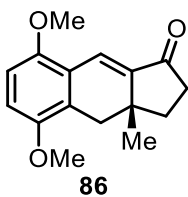

Chemical Formula: C<sub>16</sub>H<sub>18</sub>O<sub>3</sub>  
500 MHz, CDCl<sub>3</sub>

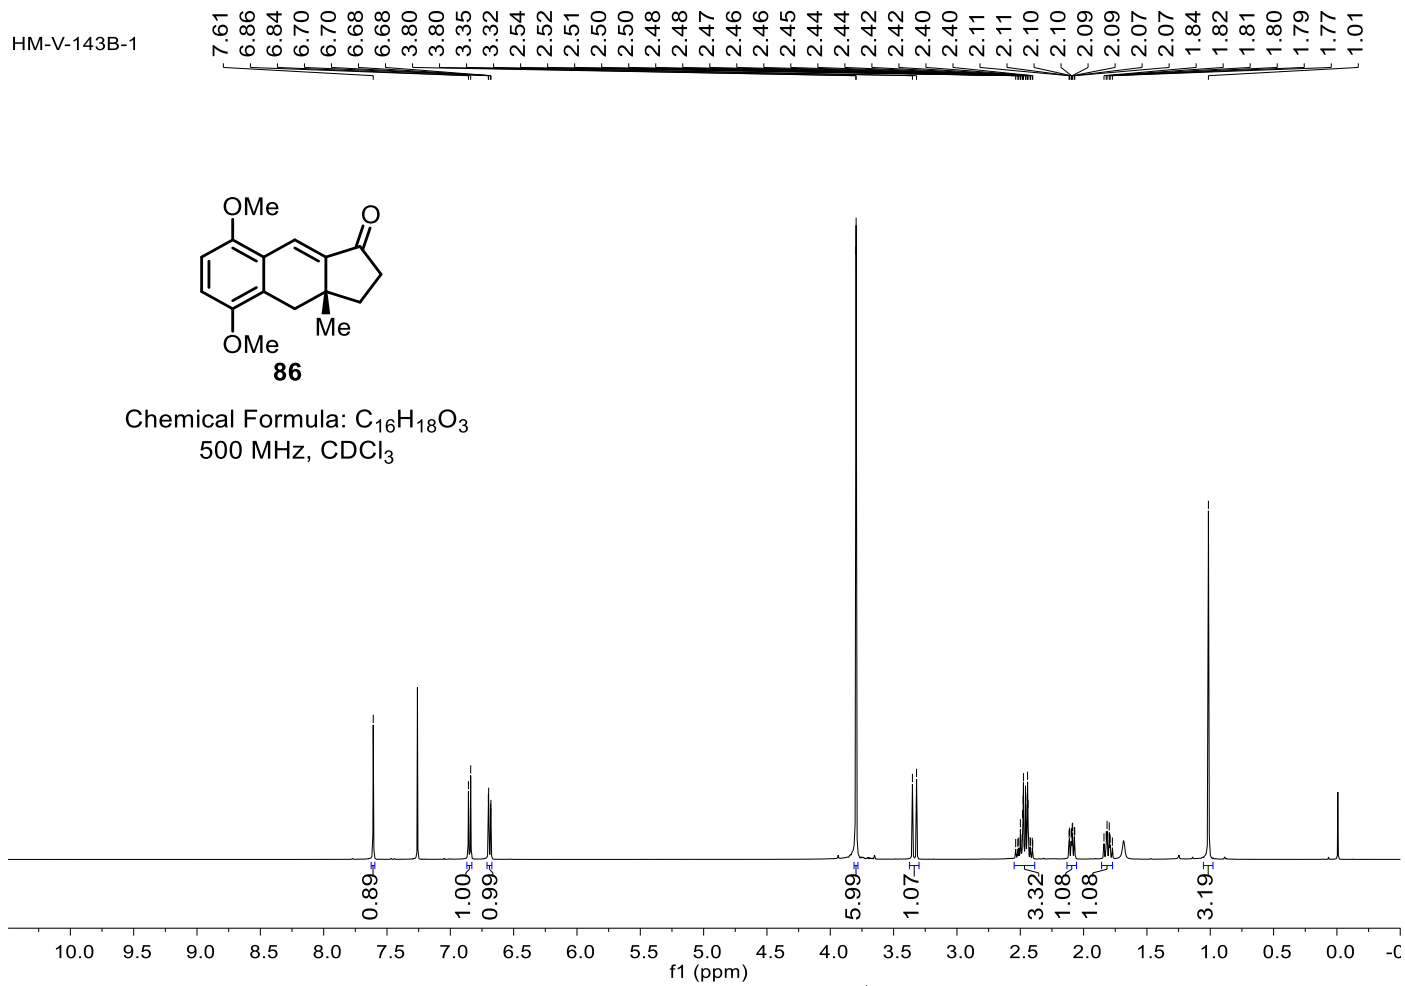

HM-V-143B-1 C

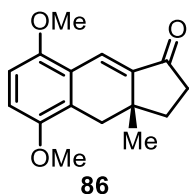

Chemical Formula: C<sub>16</sub>H<sub>18</sub>O<sub>3</sub>  
125 MHz, CDCl<sub>3</sub>

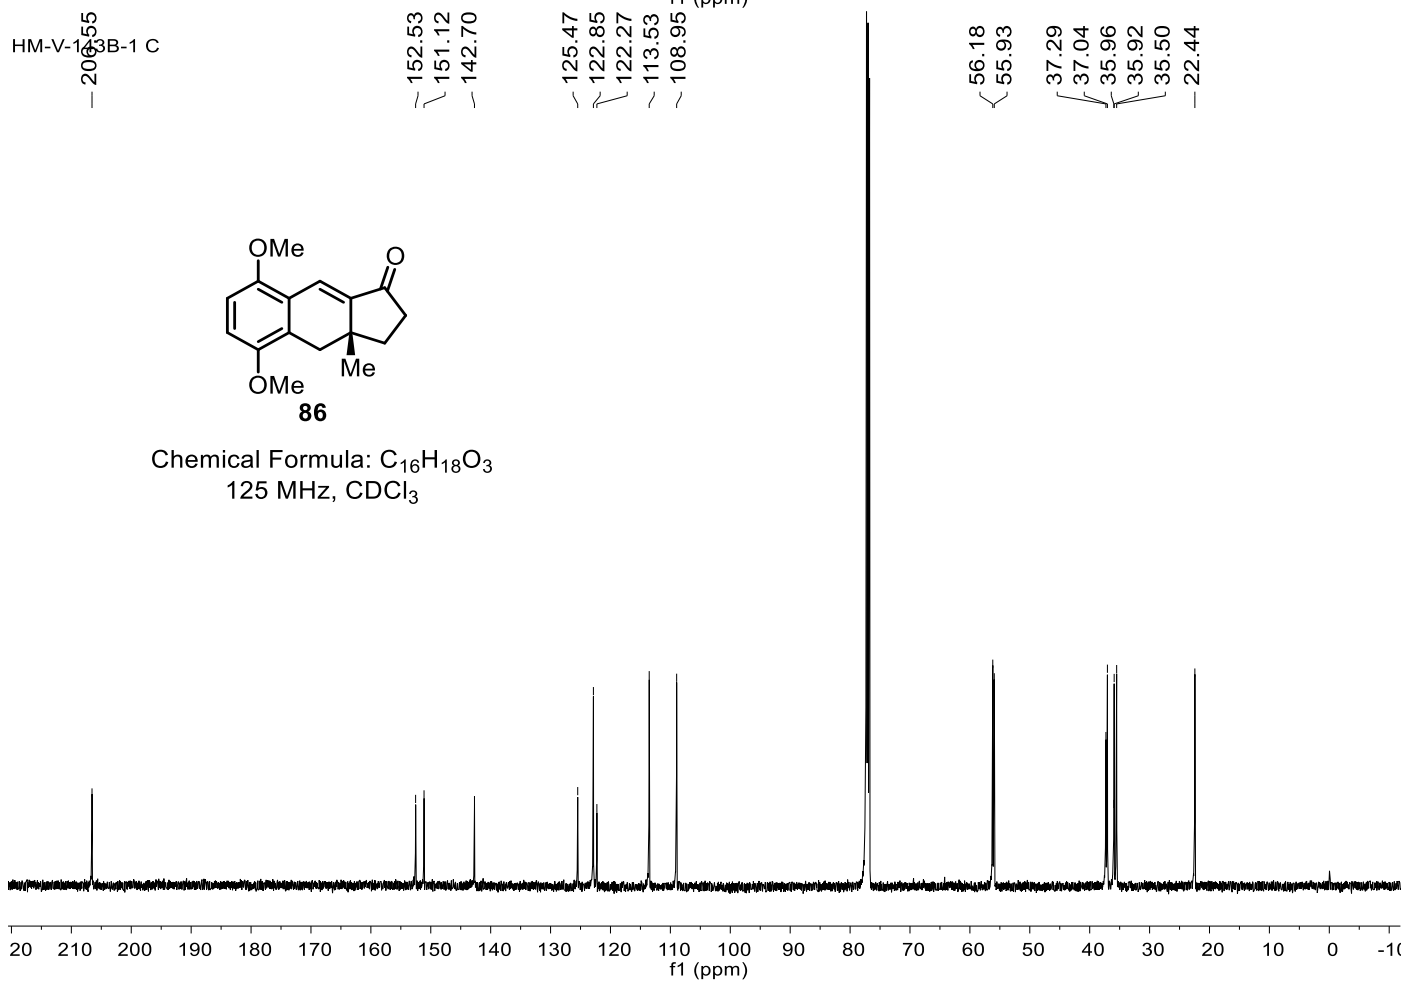

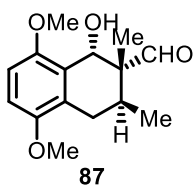

Chemical Formula: C<sub>15</sub>H<sub>22</sub>O<sub>4</sub>  
400 MHz, CDCl<sub>3</sub>

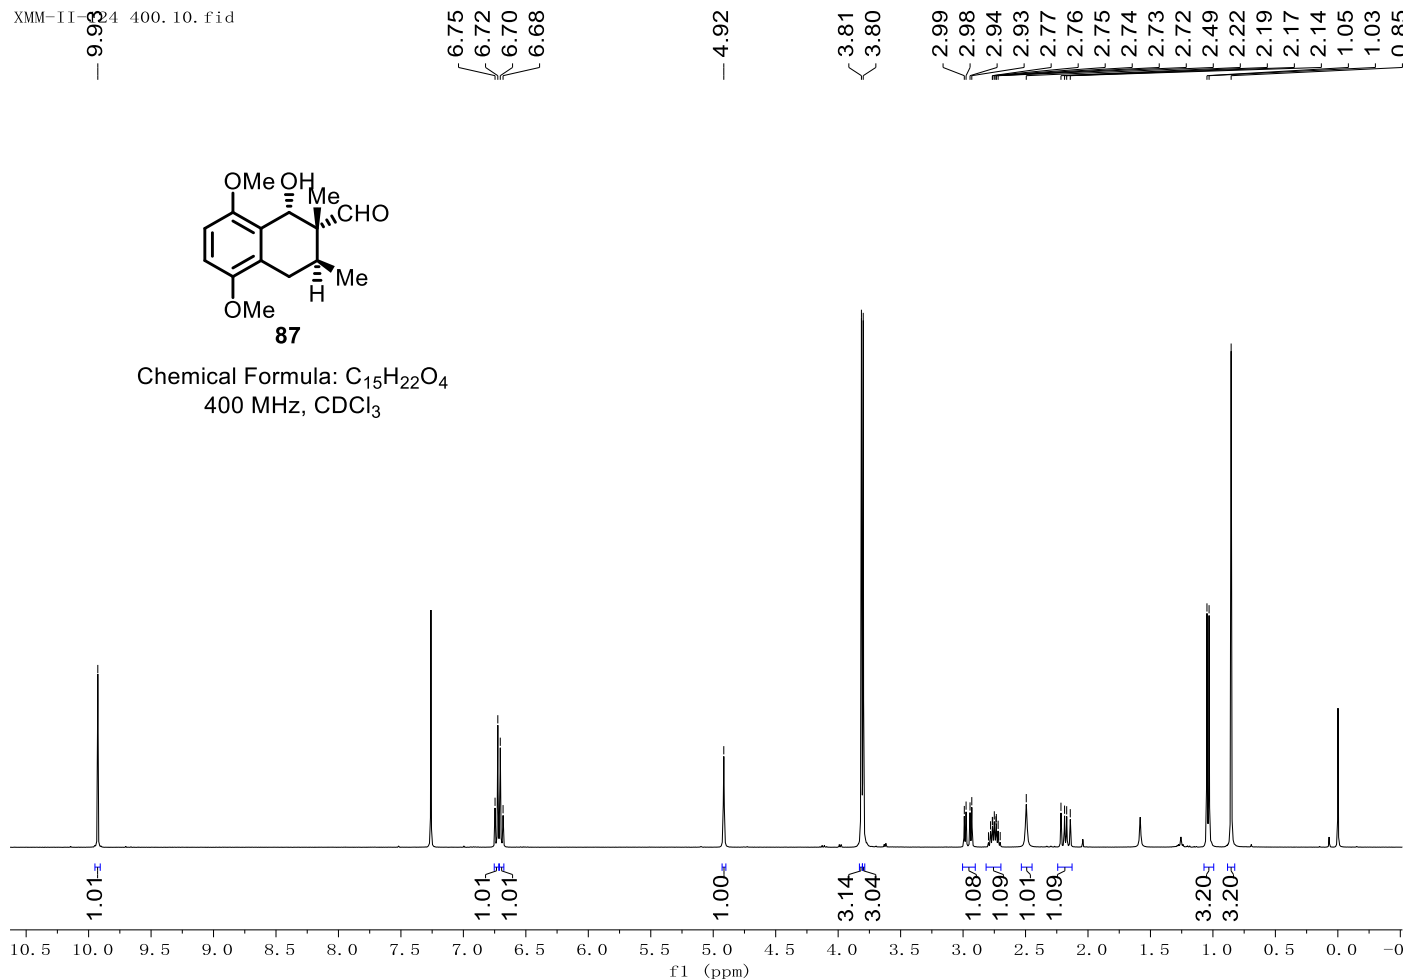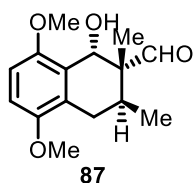

Chemical Formula: C<sub>15</sub>H<sub>22</sub>O<sub>4</sub>  
125 MHz, CDCl<sub>3</sub>

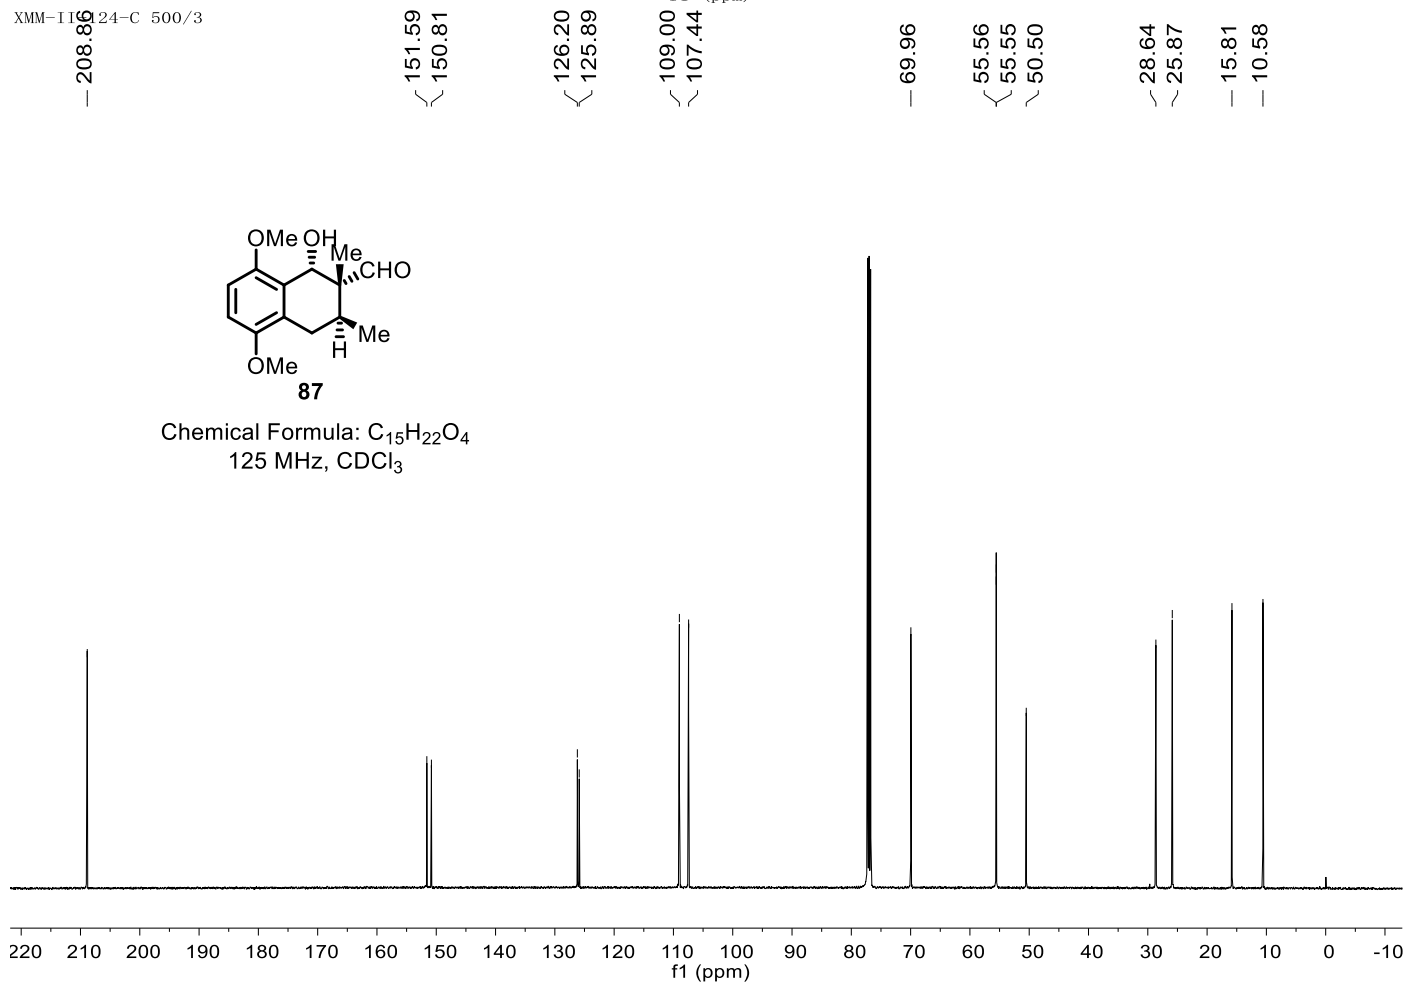

HM-VI-16A-2

7.21  
7.19  
7.17  
6.74  
6.73  
6.71

4.92

3.85  
2.89  
2.88  
2.85  
2.84  
2.74  
2.73  
2.72  
2.71  
2.69  
2.68  
2.67  
2.48  
2.47  
2.44  
2.43  
2.41  
2.32  
1.04  
1.02  
0.99

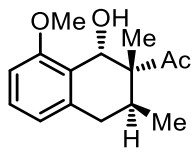

88

Chemical Formula: C<sub>15</sub>H<sub>20</sub>O<sub>3</sub>  
500 MHz, CDCl<sub>3</sub>

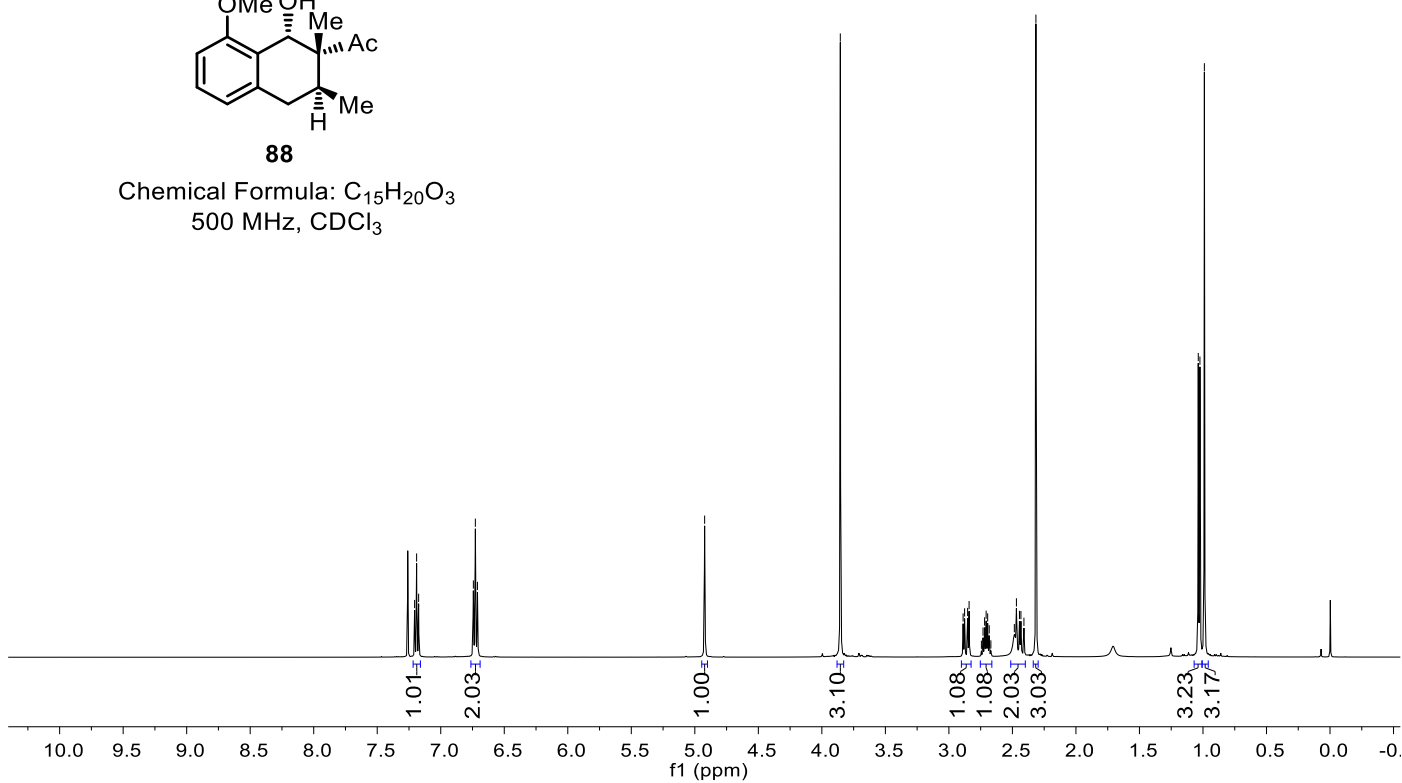

HM-VI-16A-2 C

212.57

157.96

137.17

128.54

124.81

120.87

107.57

69.24

55.36

53.53

34.80

27.55

26.63

16.97

13.20

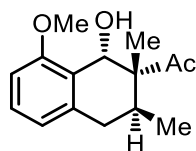

88

Chemical Formula: C<sub>15</sub>H<sub>20</sub>O<sub>3</sub>  
125 MHz, CDCl<sub>3</sub>

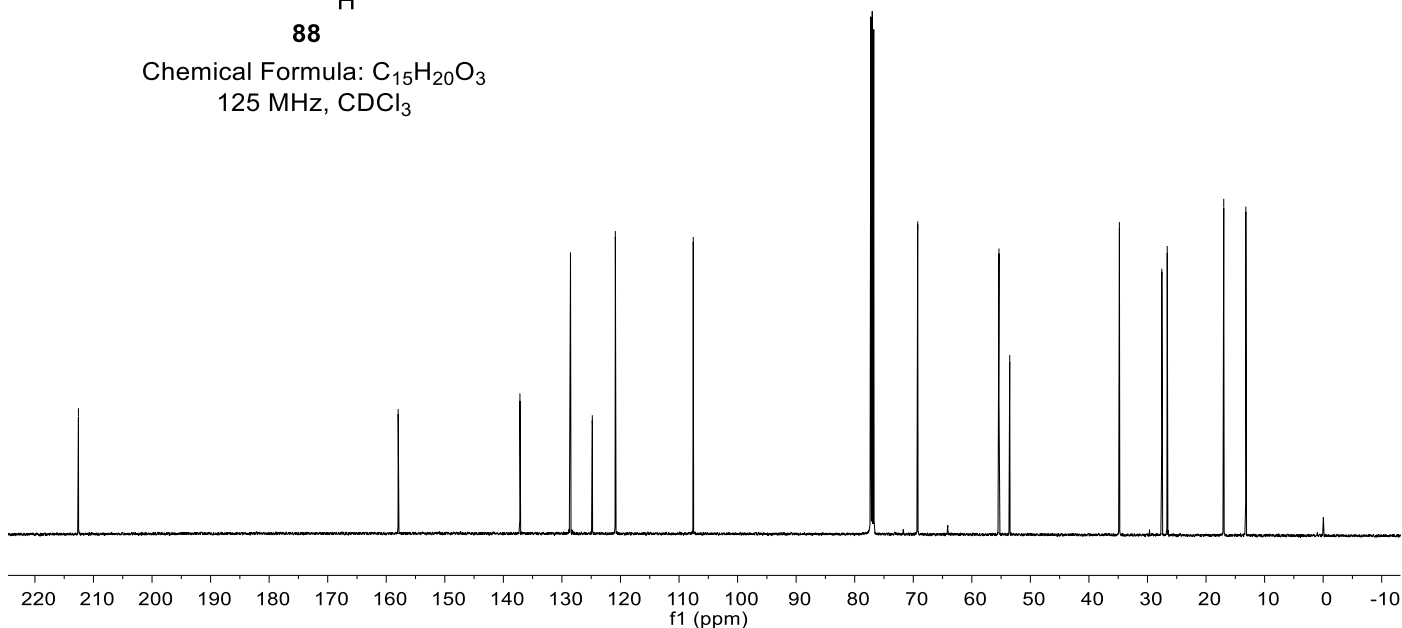

6.31  
6.31  
6.23  
6.23

4.86

3.83  
3.78  
2.84  
2.83  
2.81  
2.80  
2.74  
2.72  
2.71  
2.70  
2.69  
2.67  
2.66  
2.44  
2.41  
2.40  
2.38  
2.30  
1.03  
1.01  
0.98

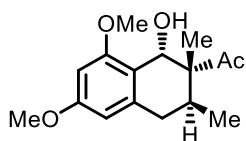

**89**

Chemical Formula: C<sub>16</sub>H<sub>22</sub>O<sub>4</sub>

500 MHz, CDCl<sub>3</sub>

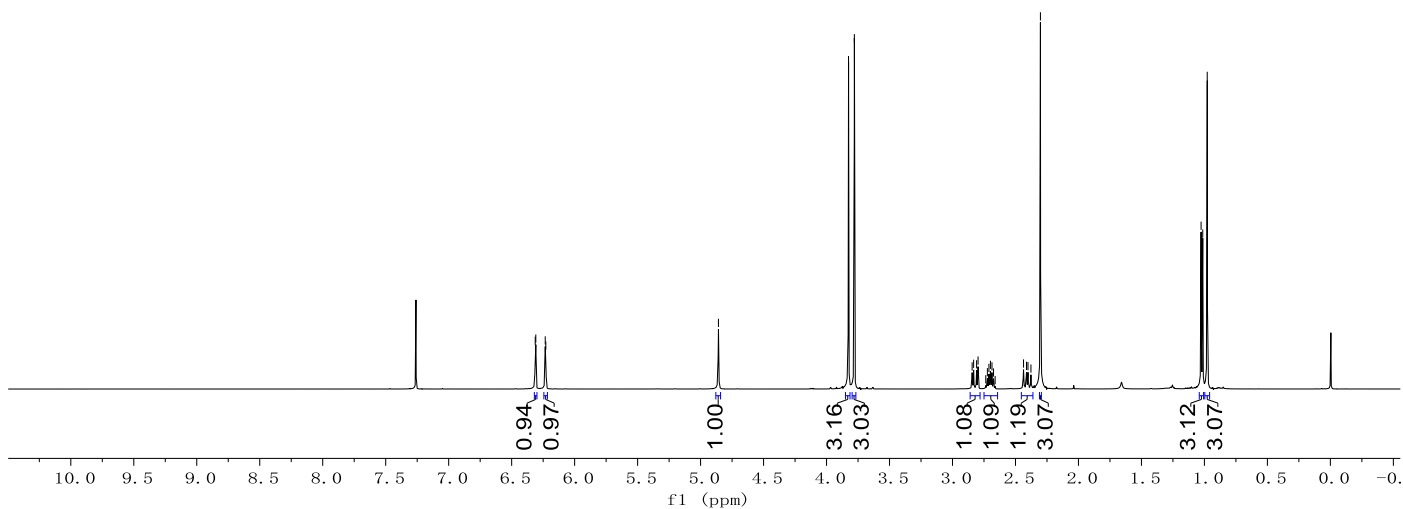

XMM-III-5-HC-500/7

212.45

160.07  
159.13

138.12

117.74

103.58

96.50

69.08

55.39  
55.25  
53.64

35.32

27.40

26.66

16.98

13.23

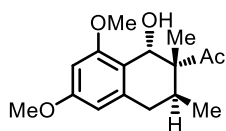

**89**

Chemical Formula: C<sub>16</sub>H<sub>22</sub>O<sub>4</sub>

125 MHz, CDCl<sub>3</sub>

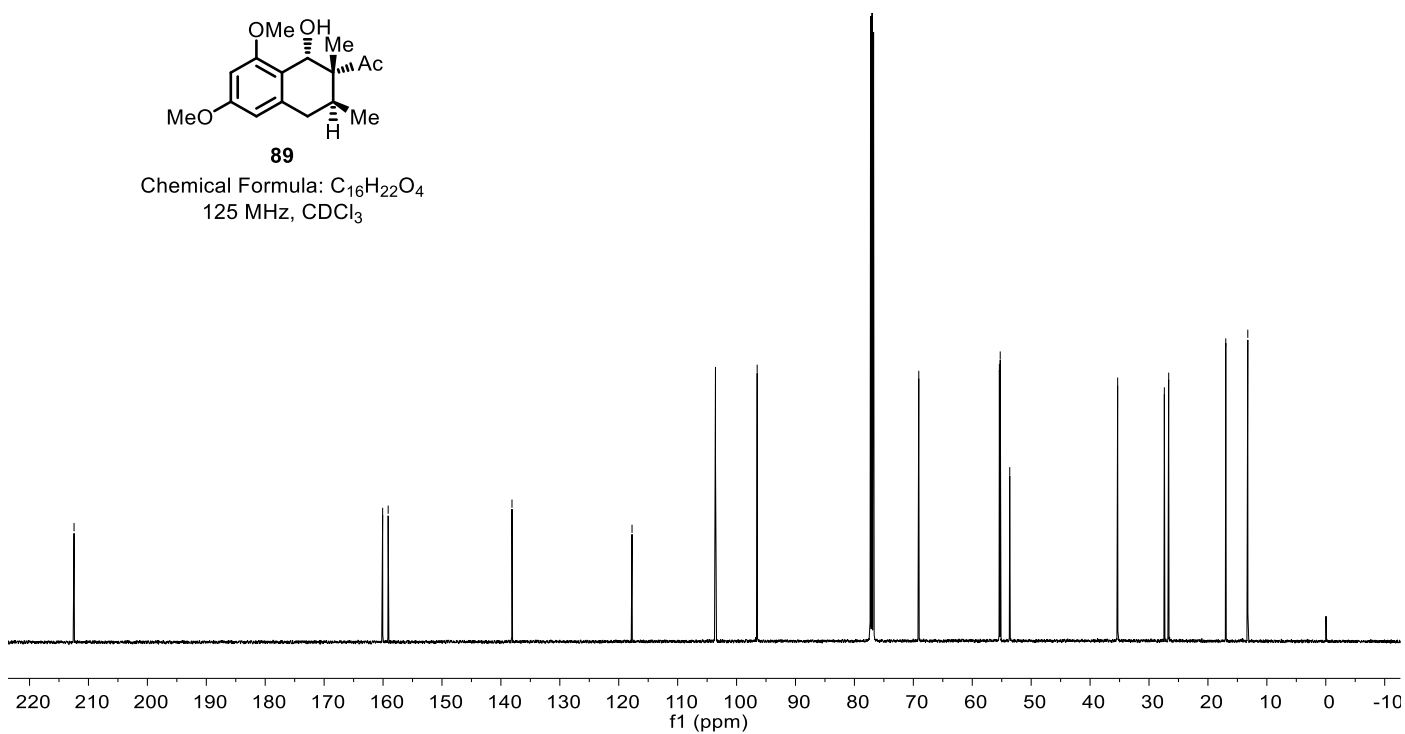



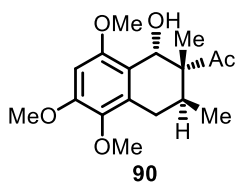

Chemical Formula: C<sub>17</sub>H<sub>24</sub>O<sub>5</sub>  
500 MHz, CDCl<sub>3</sub>

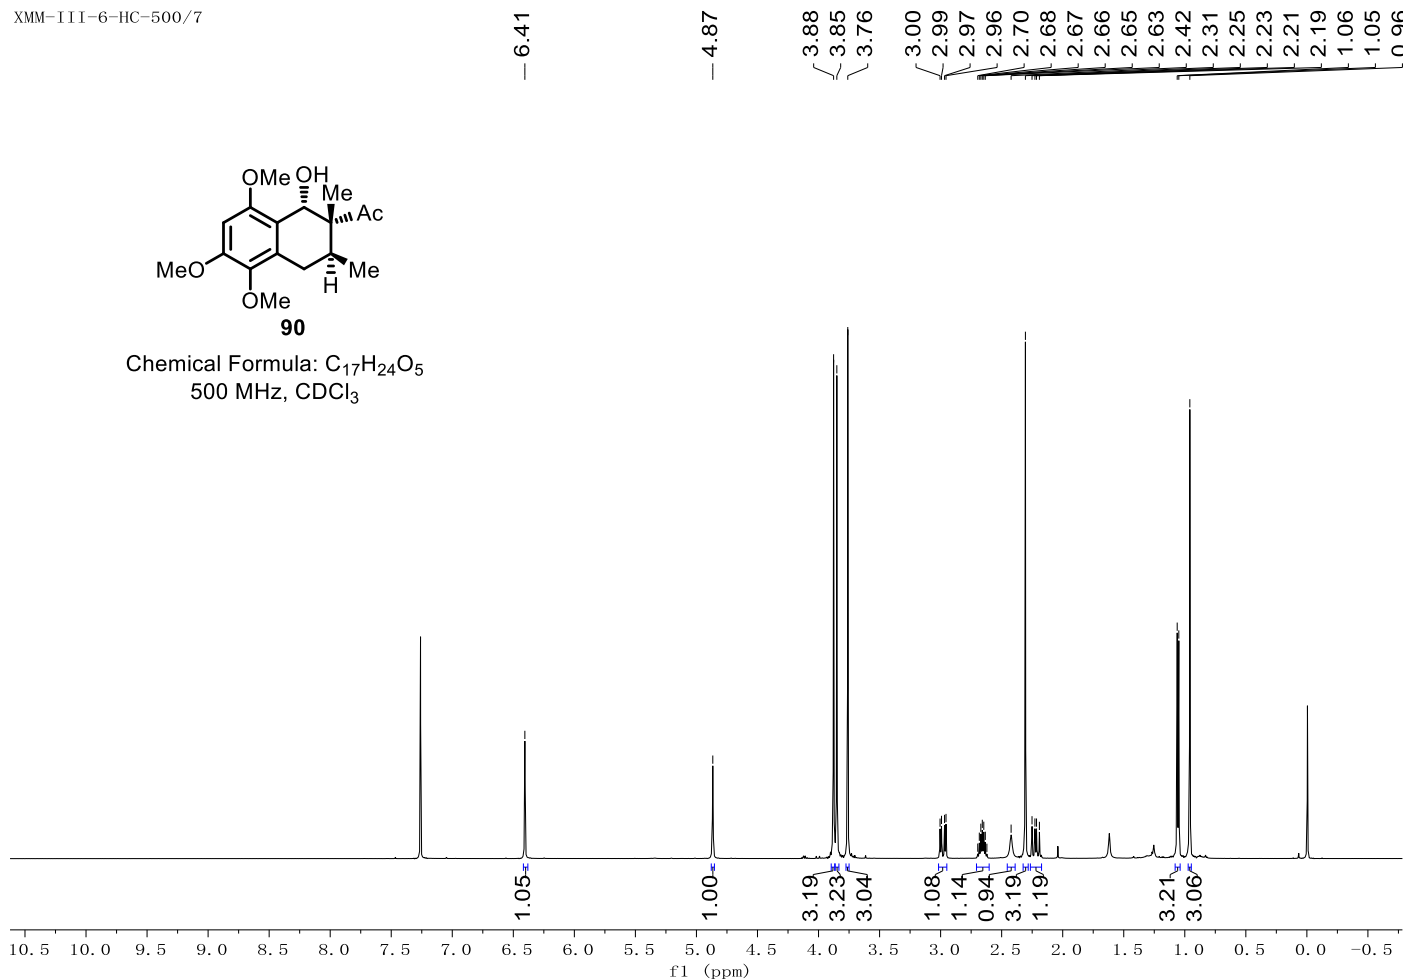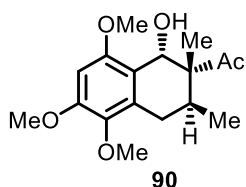

Chemical Formula: C<sub>17</sub>H<sub>24</sub>O<sub>5</sub>  
125 MHz, CDCl<sub>3</sub>

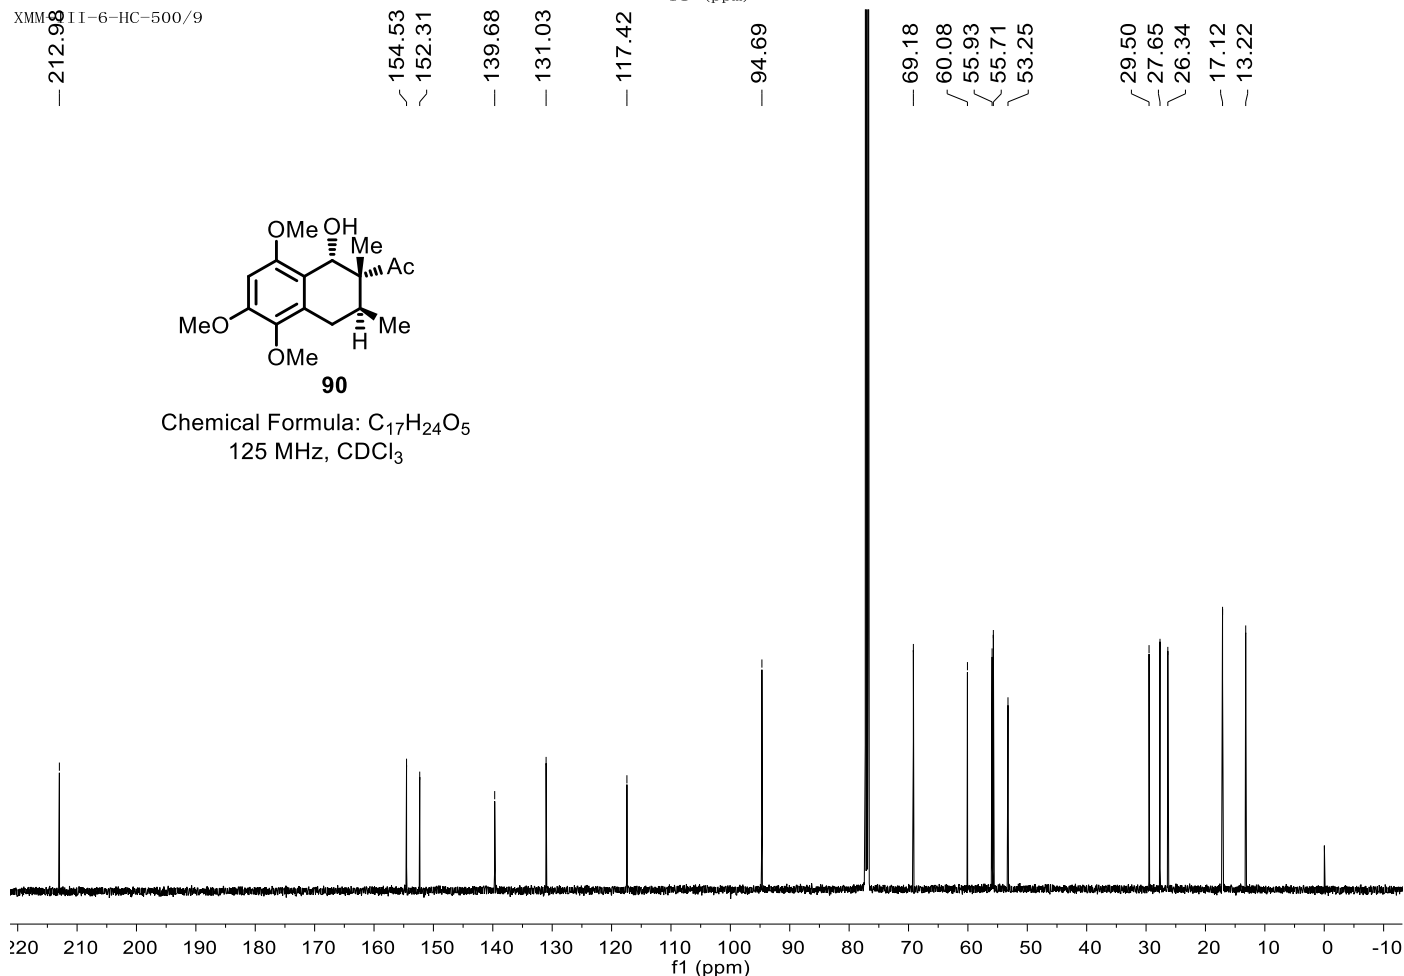

HM-IV-98-1

6.7321  
6.7100  
6.6976  
6.6754

4.9020

3.8198  
3.7903  
2.9613  
2.9464  
2.9148  
2.9000  
2.6624  
2.6486  
2.6462  
2.6326  
2.5431  
2.3128  
2.3064  
2.1610  
2.1319  
2.1145  
2.0854  
1.0693  
1.0530  
0.9680

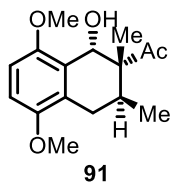

Chemical Formula: C<sub>16</sub>H<sub>22</sub>O<sub>4</sub>  
400 MHz, CDCl<sub>3</sub>

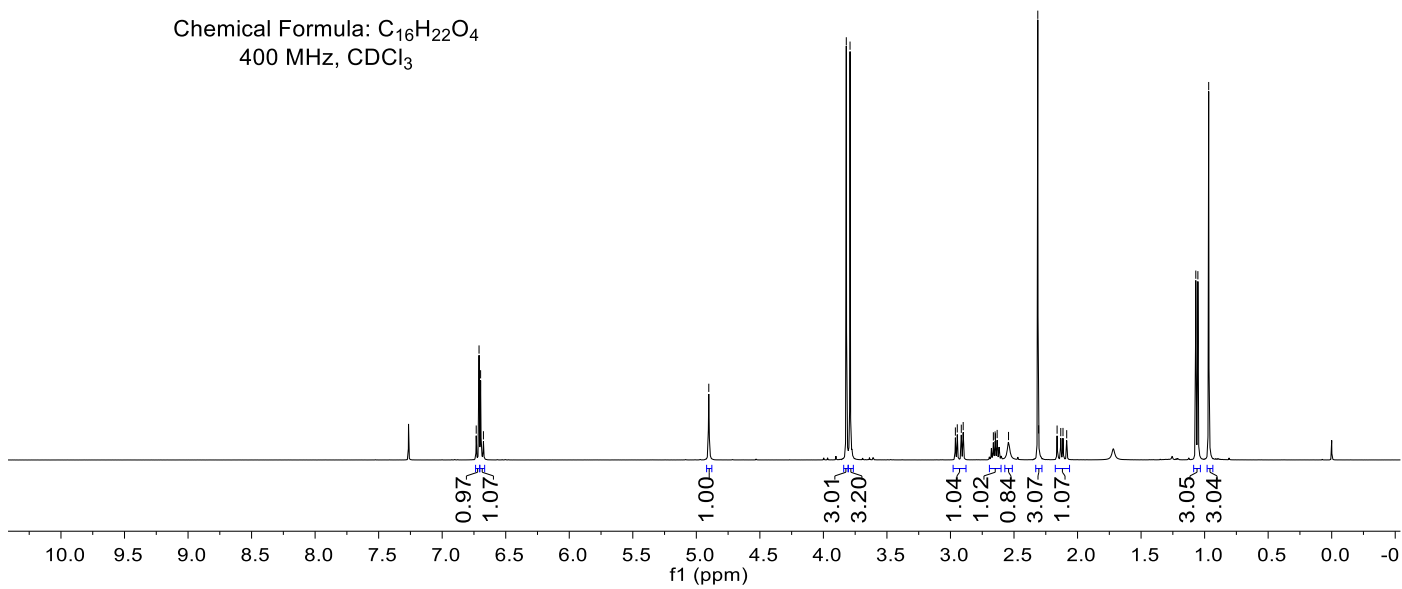

212.87  
IV-98-1 C

151.74  
150.77

126.16  
125.87

108.88  
107.43

69.36

55.62  
55.54  
53.12

29.41  
27.61  
26.11  
17.08  
13.18

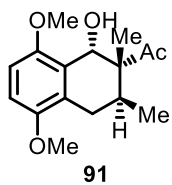

Chemical Formula: C<sub>16</sub>H<sub>22</sub>O<sub>4</sub>  
125 MHz, CDCl<sub>3</sub>

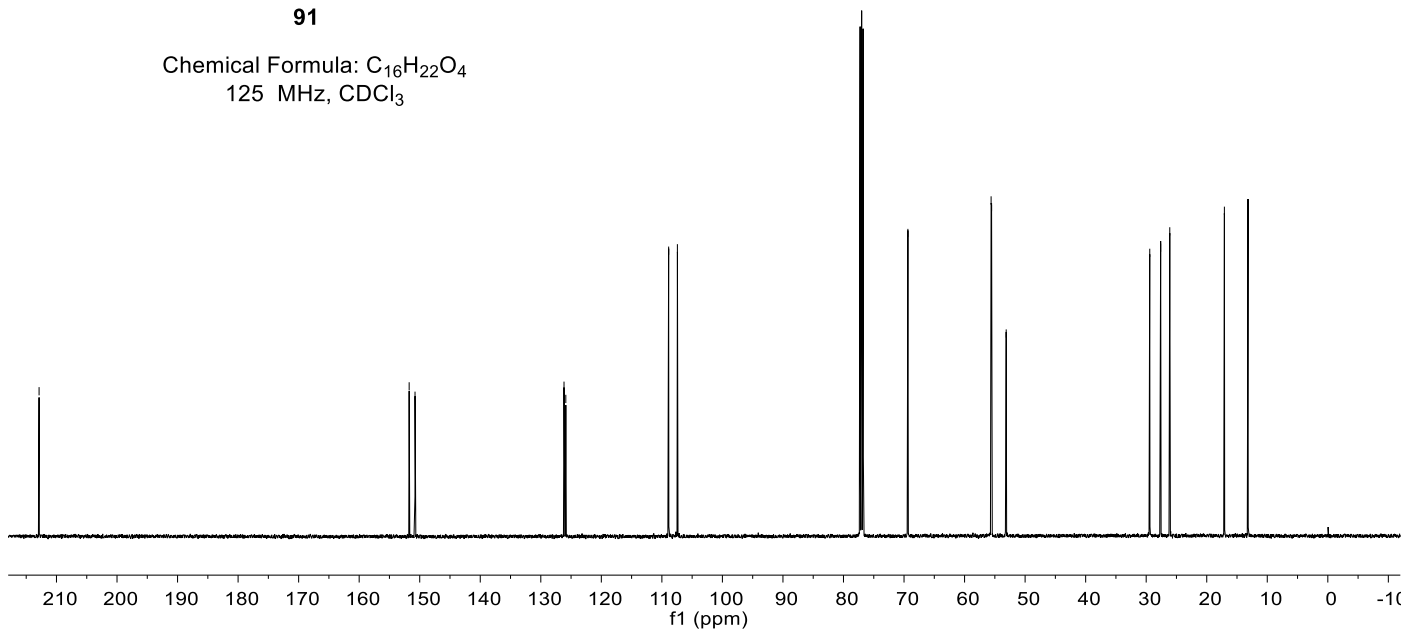

XMM-II-111

7.34  
7.33  
7.32  
7.31  
7.28  
7.28  
7.26  
7.25  
7.24  
7.23  
7.23  
6.75  
6.73  
6.72  
6.70

5.03

4.07  
4.03  
4.00  
3.96  
3.84  
3.80

3.00  
2.98  
2.95  
2.94  
2.77  
2.75  
2.74  
2.72  
2.71  
2.69  
2.55  
2.20  
2.17  
2.15  
2.12  
1.11  
1.09  
1.04

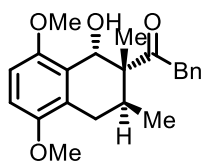

92

Chemical Formula: C<sub>22</sub>H<sub>26</sub>O<sub>4</sub>  
400 MHz, CDCl<sub>3</sub>

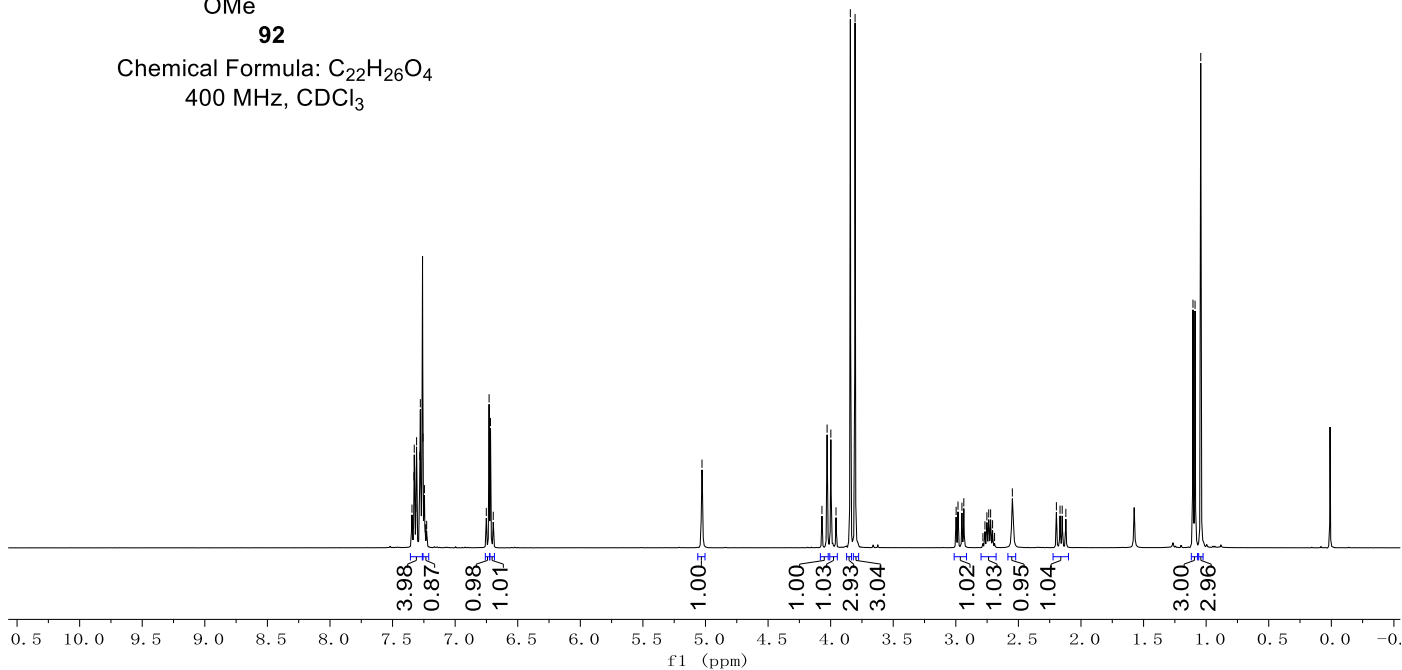

XMM-I-113-HC 400.11.fid

211.36  
151.81  
150.86  
135.26  
129.97  
128.23  
126.47  
126.23  
125.96  
108.99  
107.52  
69.68  
55.67  
55.58  
53.57  
45.60  
29.51  
26.22  
17.25  
13.15

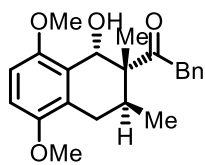

92

Chemical Formula: C<sub>22</sub>H<sub>26</sub>O<sub>4</sub>  
100 MHz, CDCl<sub>3</sub>

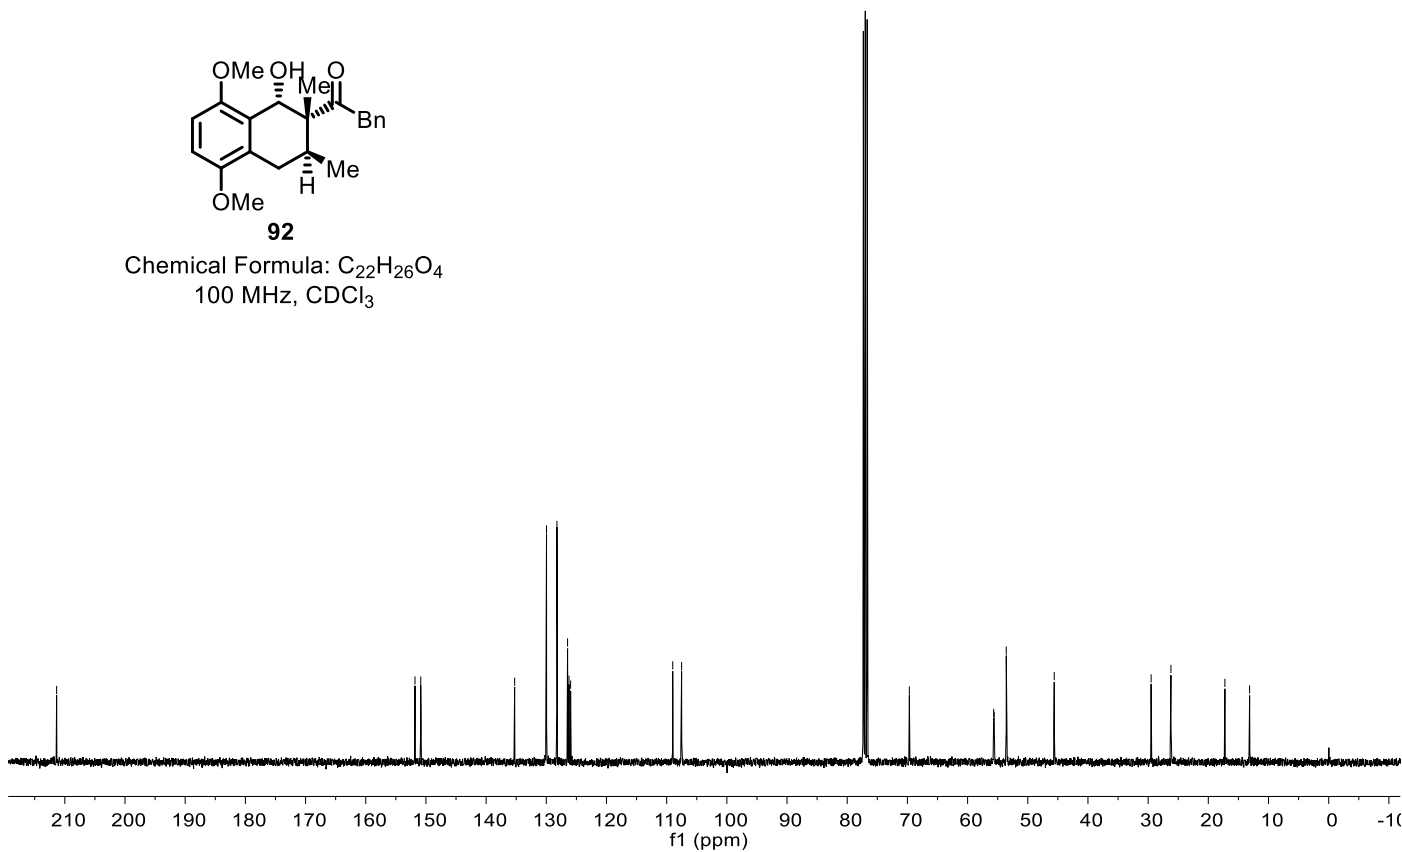

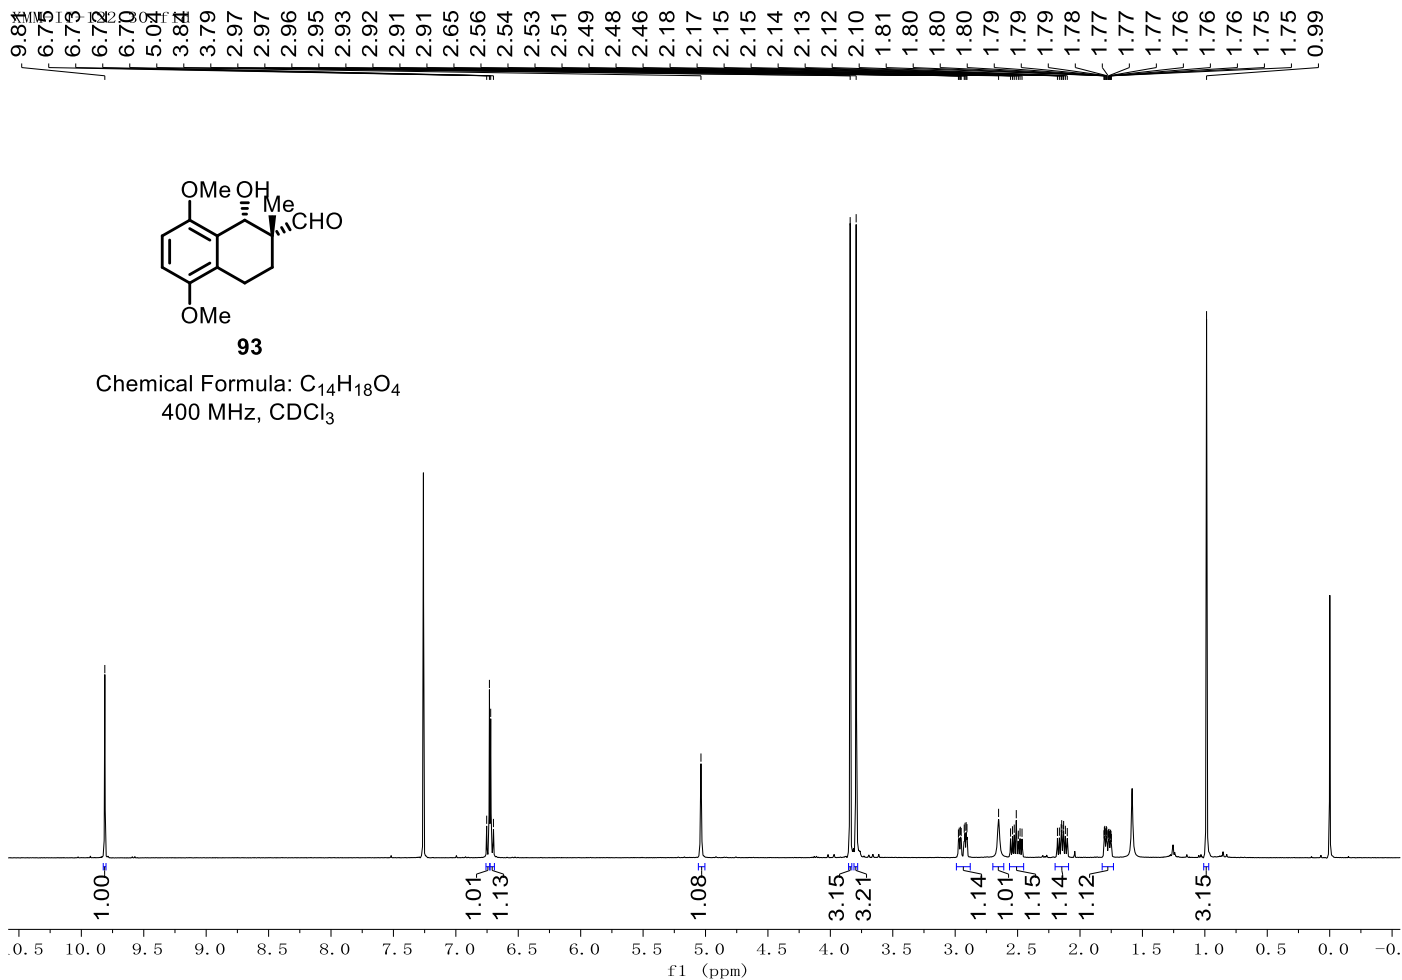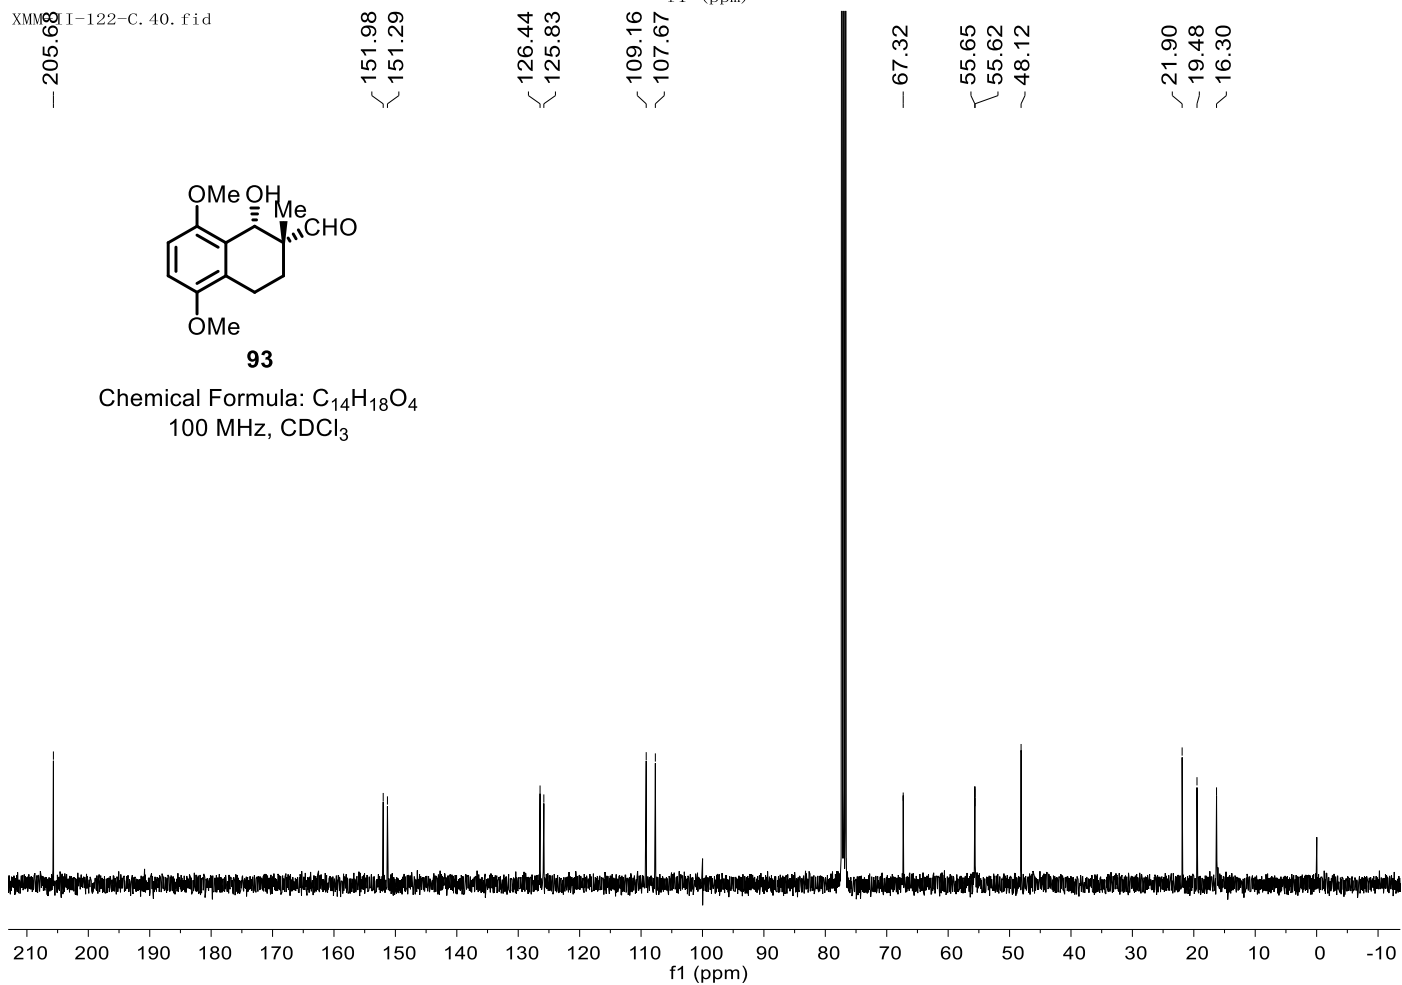

6.74  
6.72  
6.71  
6.69  
5.09  
5.09  
3.84  
3.79  
2.98  
2.97  
2.96  
2.96  
2.93  
2.93  
2.92  
2.91  
2.52  
2.50  
2.49  
2.47  
2.46  
2.45  
2.44  
2.43  
2.33  
2.15  
2.13  
2.11  
2.10  
2.08  
2.07  
1.94  
1.94  
1.93  
1.92  
1.92  
1.91  
1.91  
1.90  
1.89  
1.89  
1.88  
1.00

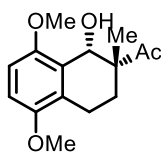

94

Chemical Formula: C<sub>15</sub>H<sub>20</sub>O<sub>4</sub>  
400 MHz, CDCl<sub>3</sub>

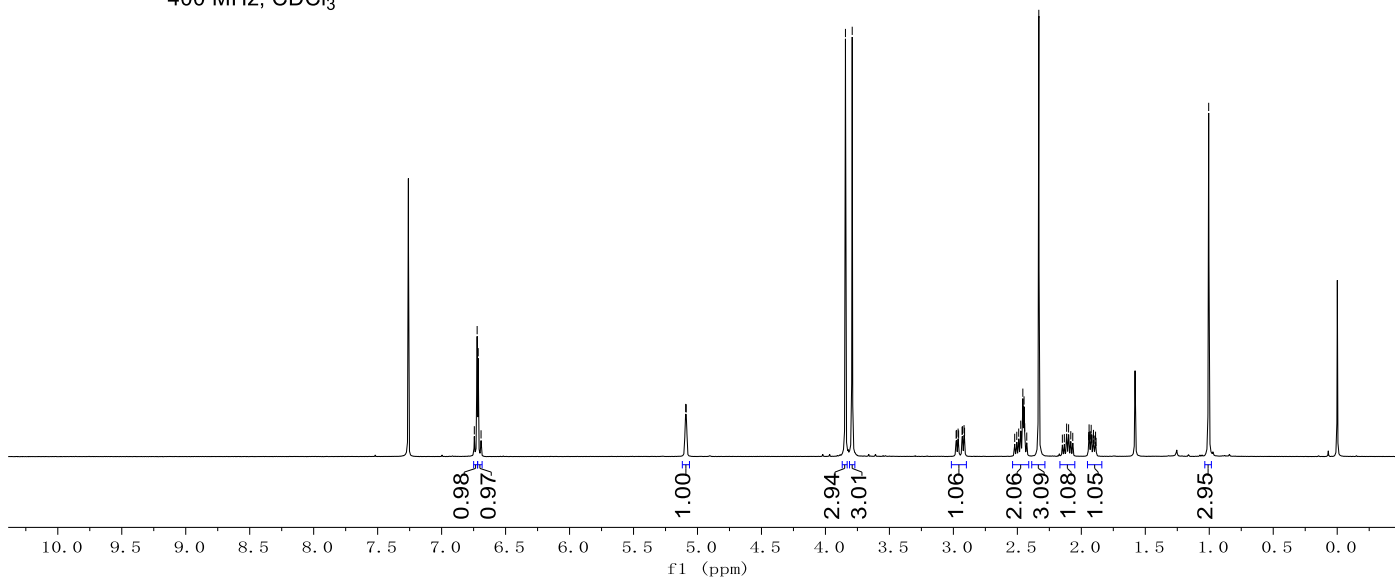

212.70  
152.03  
151.24  
126.24  
125.99  
109.04  
107.56  
67.40  
55.65  
55.60  
49.88  
25.57  
22.31  
20.05  
18.17

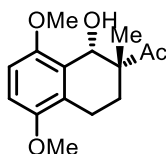

94

Chemical Formula: C<sub>15</sub>H<sub>20</sub>O<sub>4</sub>  
100 MHz, CDCl<sub>3</sub>

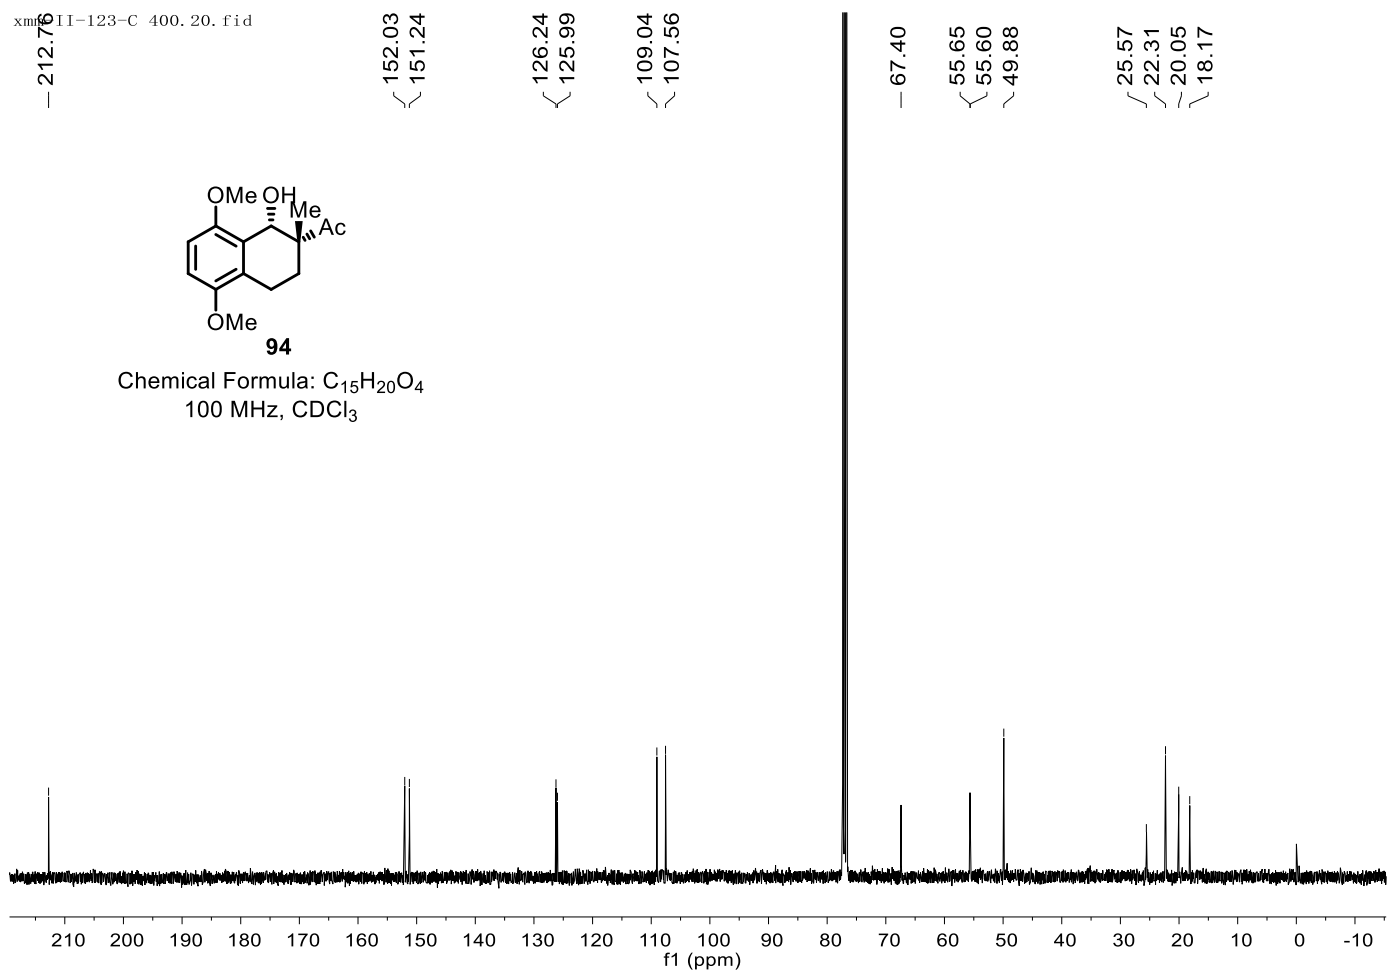

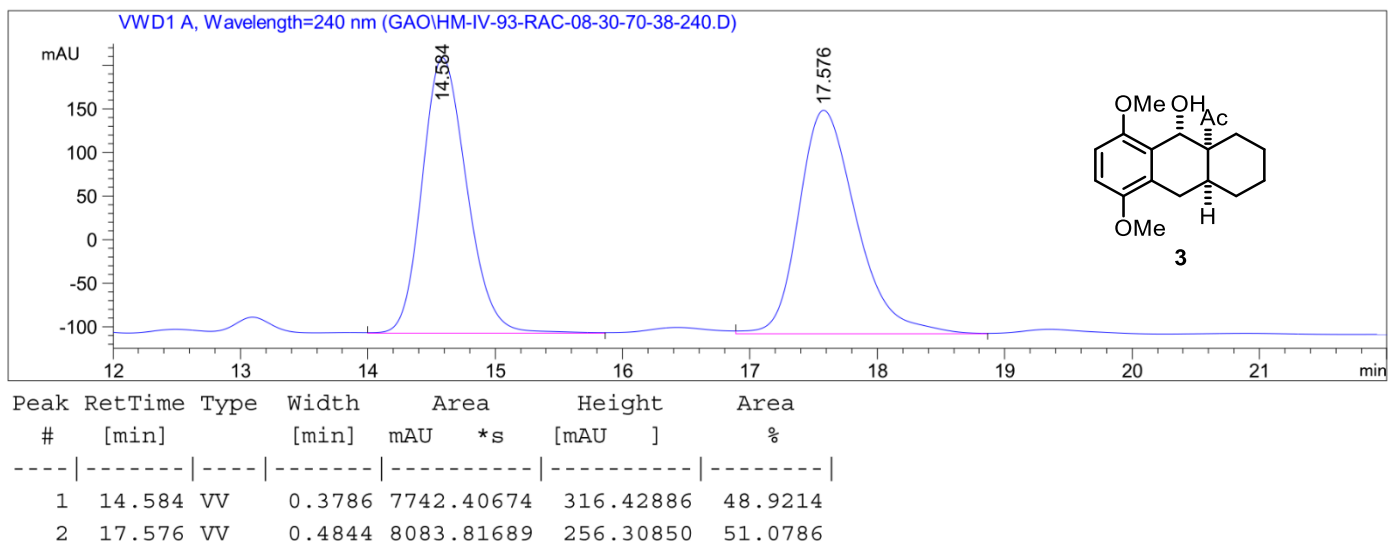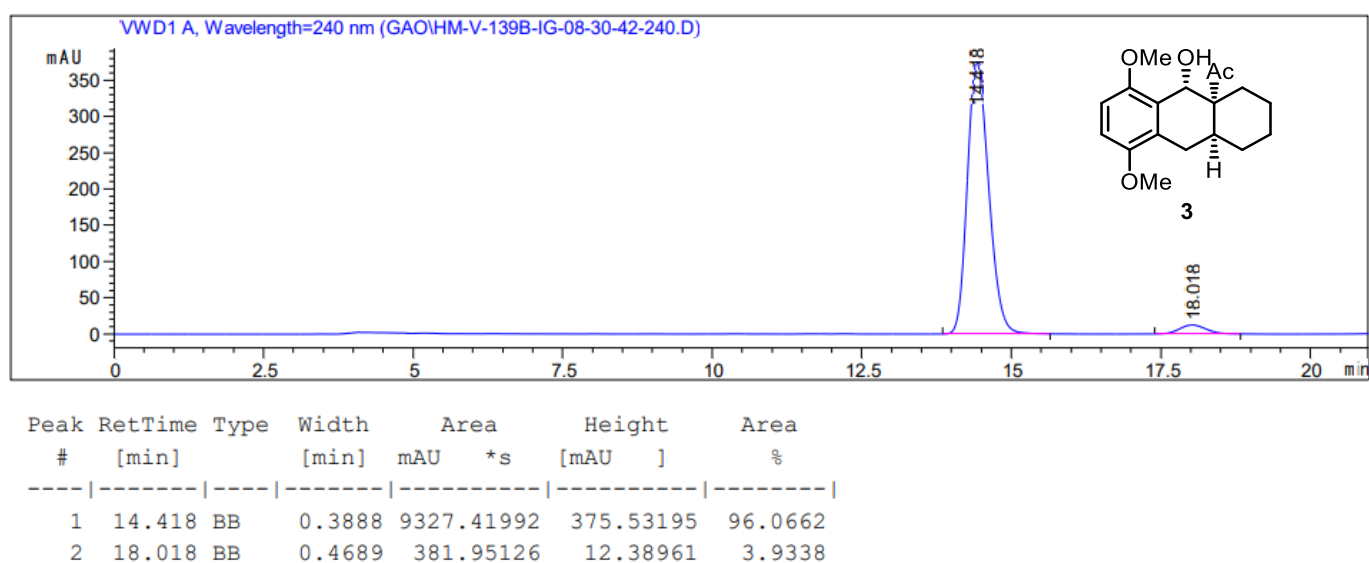

Enantiomeric excess: 92%, determined by HPLC (Daicel Chiralpak IG, hexane/isopropanol = 70/30, flow rate 0.8 mL/min, T = 25 °C, 240 nm):  $t_R = 14.419$ min (major),  $t_R = 18.018$  min (minor).

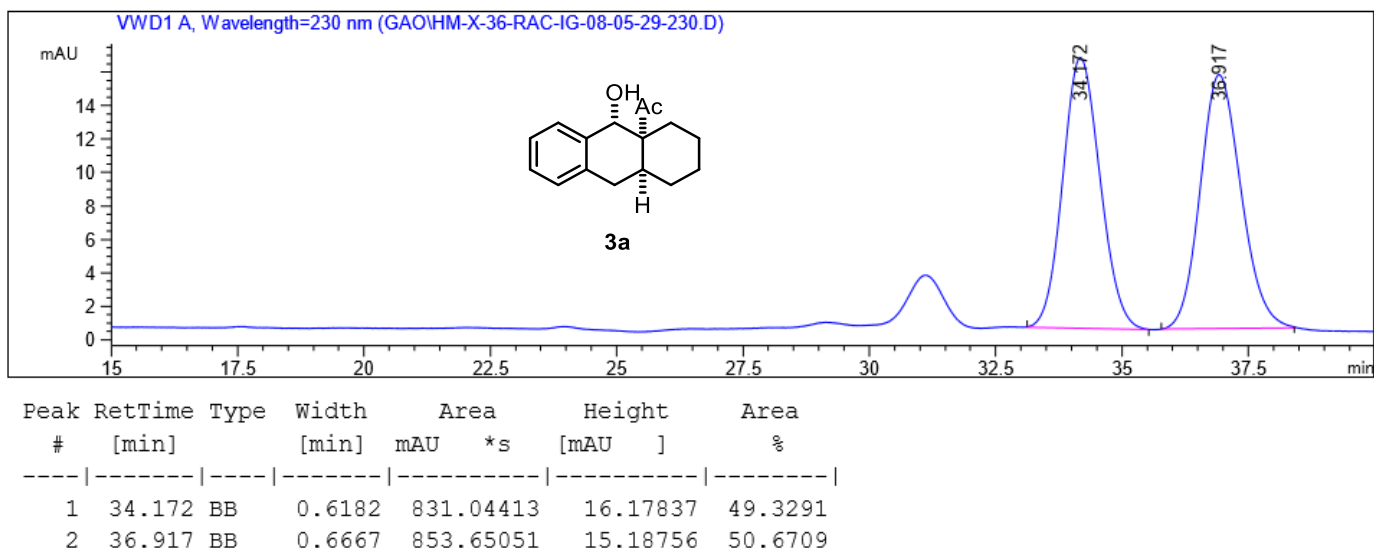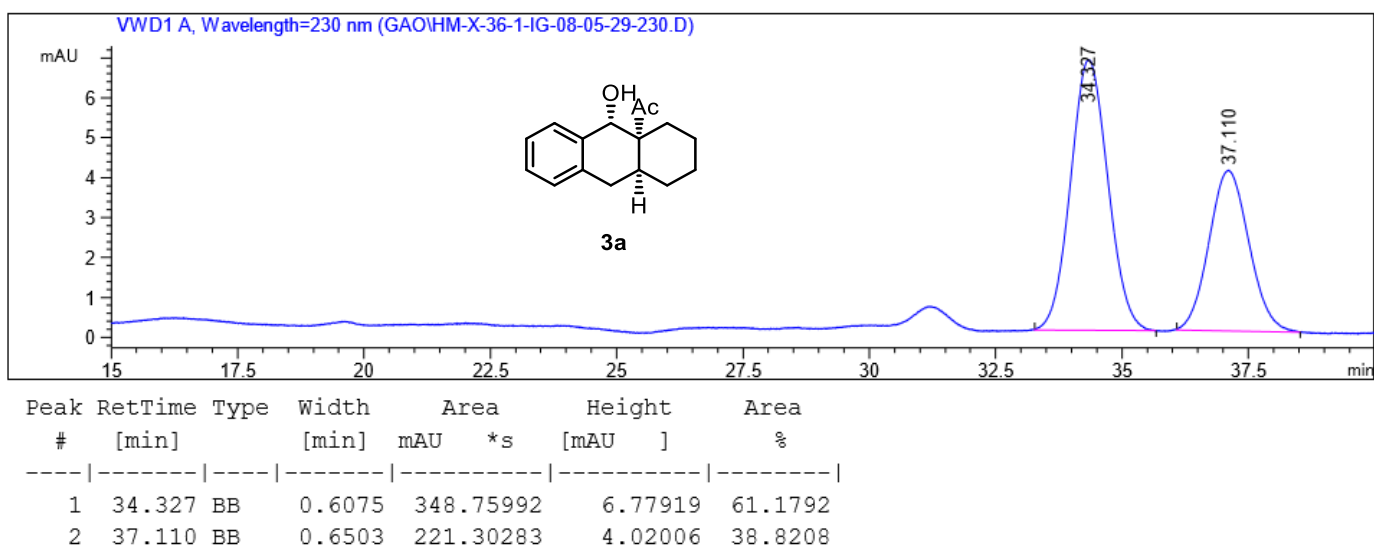

Enantiomeric excess: 22%, determined by HPLC (Daicel Chiralpak IG, hexane/isopropanol = 95/5, flow rate 0.8 mL/min, T = 25 °C, 240 nm):  $t_R = 34.327$ min (major),  $t_R = 37.110$  min (minor).

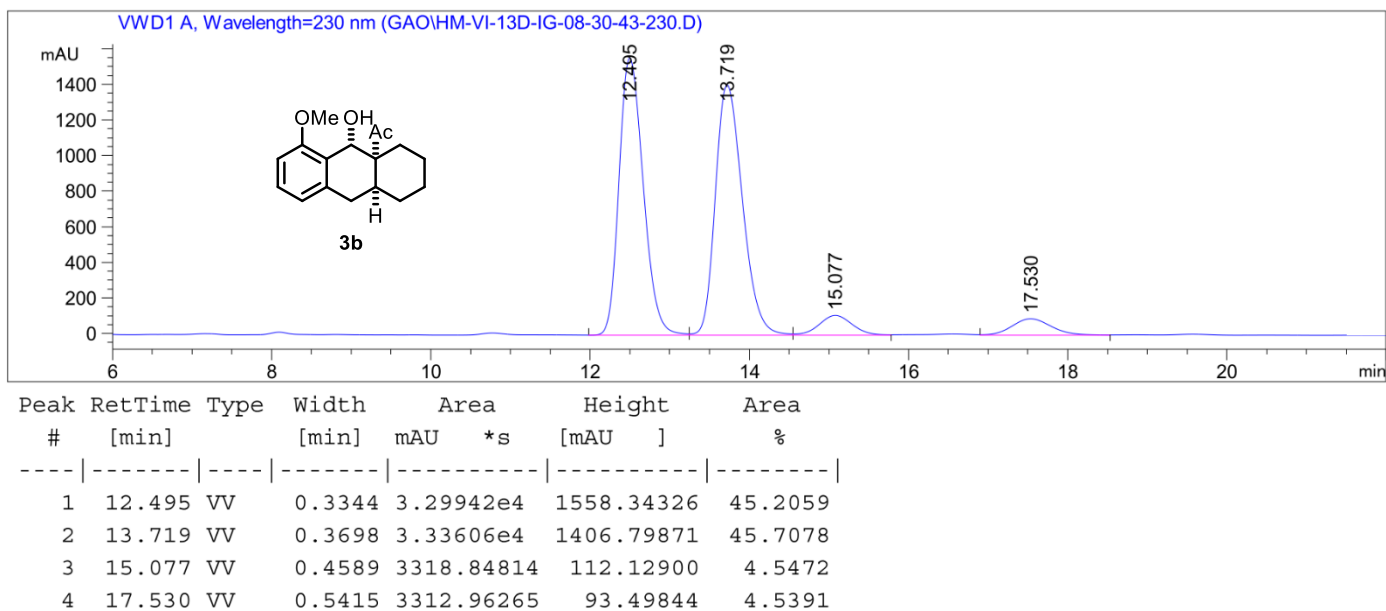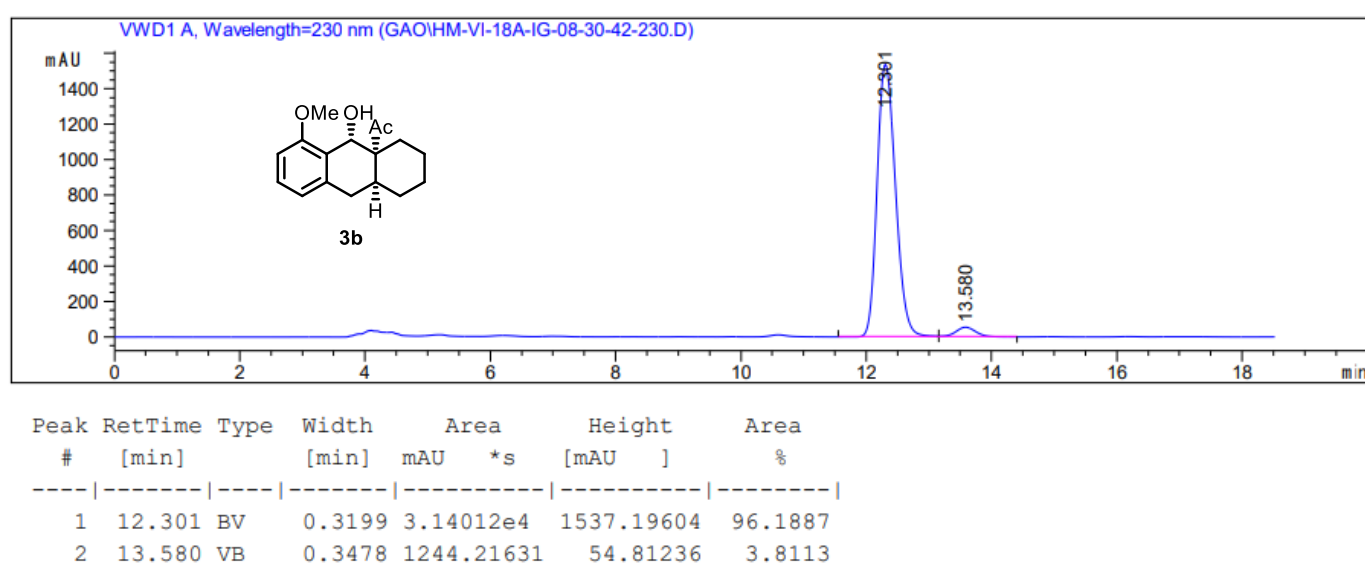

Enantiomeric excess: 92%, determined by HPLC (Daicel Chiralpak IG, hexane/isopropanol = 70/30, flow rate 0.8 mL/min, T = 25 °C, 230 nm):  $t_R = 12.301$ min (major),  $t_R = 13.580$  min (minor).



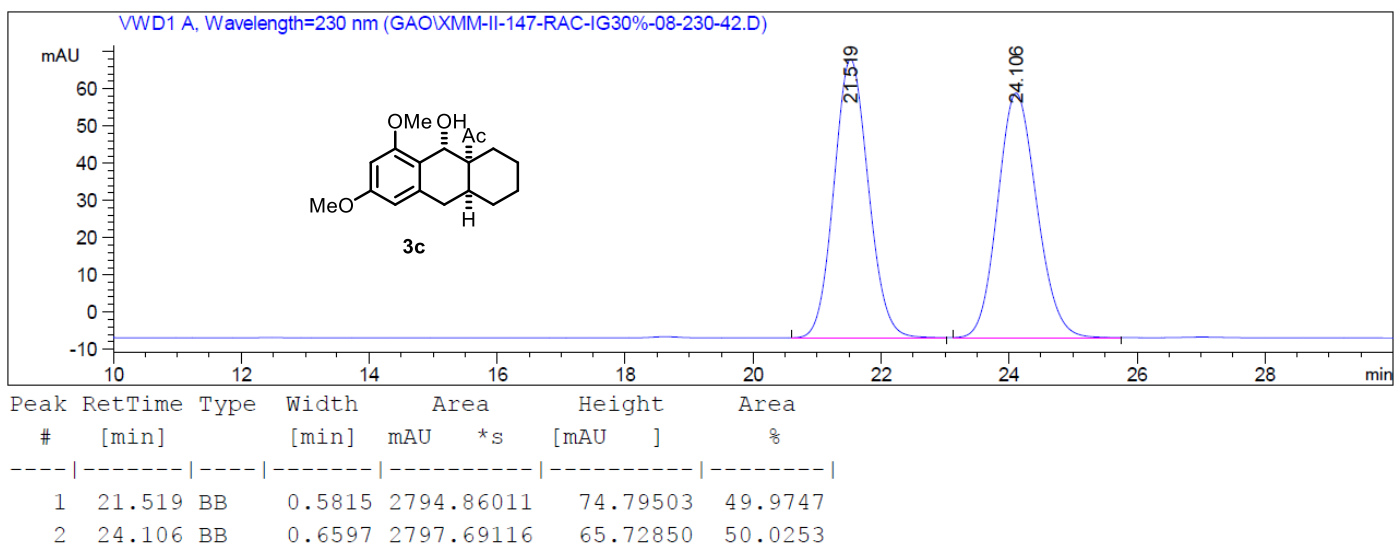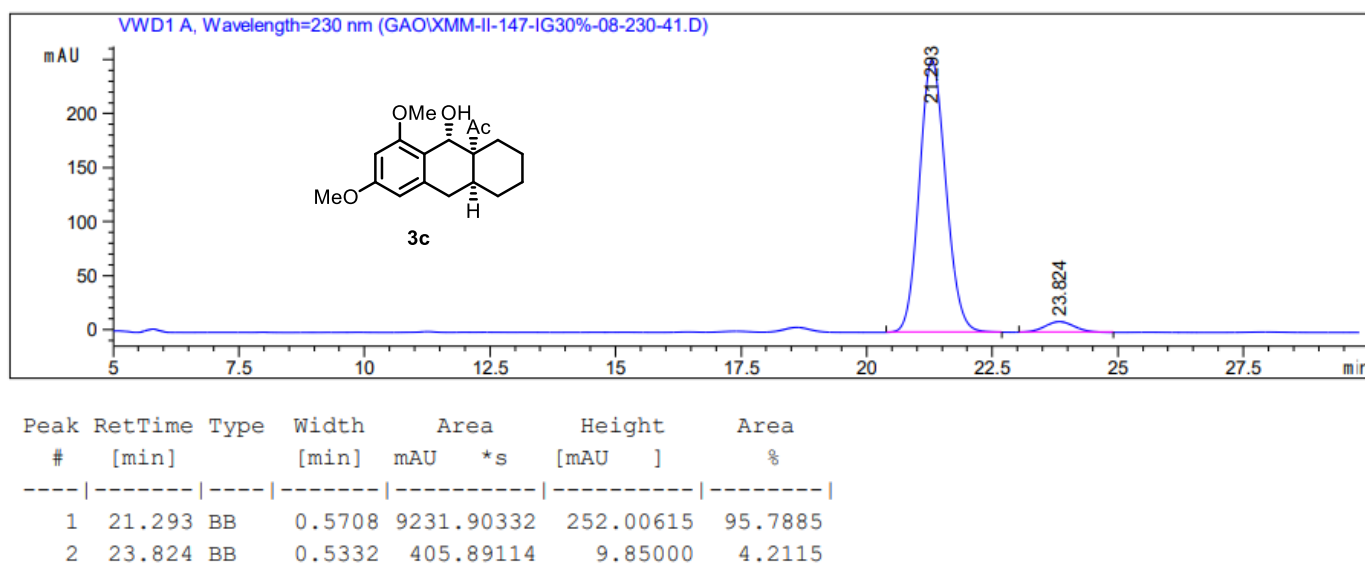

Enantiomeric excess: 91%, determined by HPLC (Daicel Chiralpak IG, hexane/isopropanol = 70/30, flow rate 0.8 mL/min, T = 25 °C, 230 nm):  $t_R$  = 21.293 min (major),  $t_R$  = 23.830 min (minor).

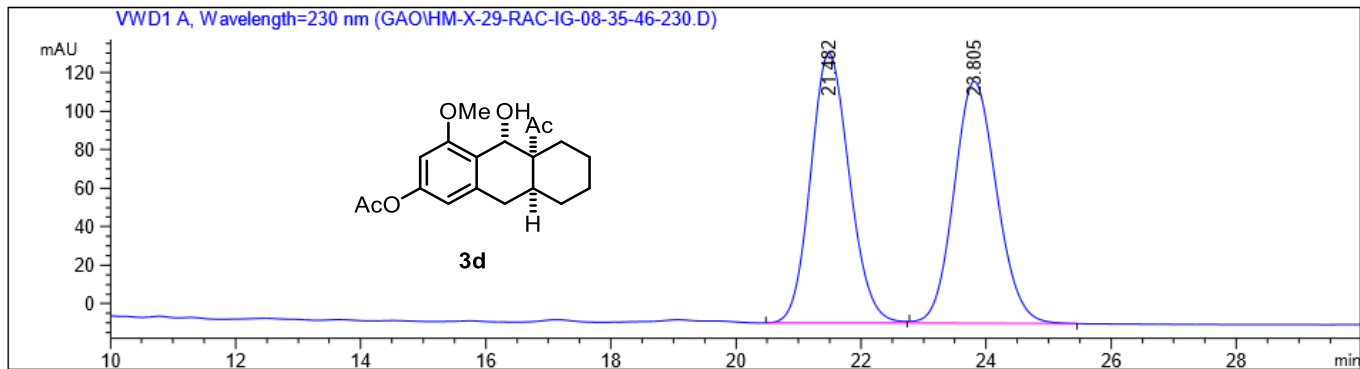

| Peak # | RetTime [min] | Type | Width [min] | Area mAU *s | Height [mAU] | Area %  |
|--------|---------------|------|-------------|-------------|--------------|---------|
| 1      | 21.482        | BB   | 0.6667      | 6054.22070  | 140.23820    | 50.3307 |
| 2      | 23.805        | BB   | 0.7373      | 5974.65332  | 125.68867    | 49.6693 |

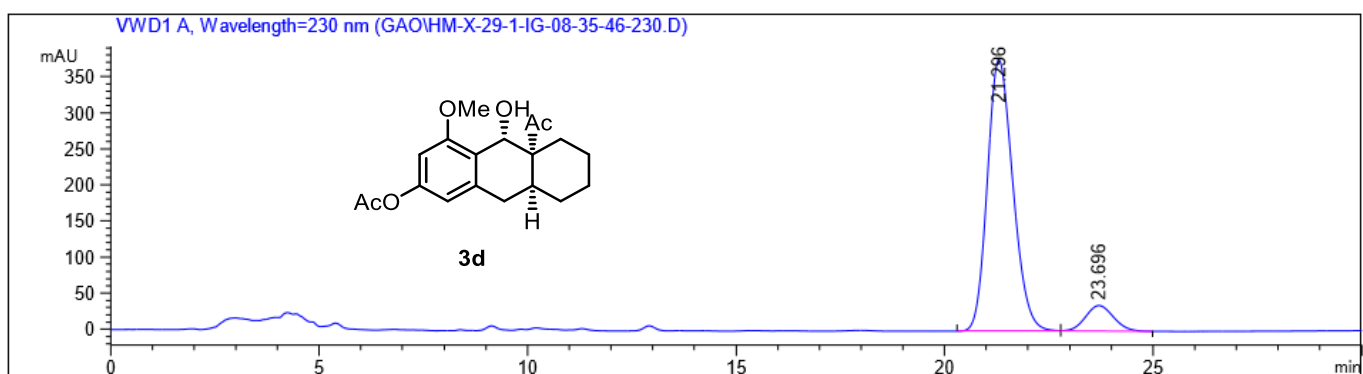

| Peak # | RetTime [min] | Type | Width [min] | Area mAU *s | Height [mAU] | Area %  |
|--------|---------------|------|-------------|-------------|--------------|---------|
| 1      | 21.296        | BB   | 0.6510      | 1.60832e4   | 376.11768    | 90.4950 |
| 2      | 23.696        | BB   | 0.6746      | 1689.27344  | 35.68293     | 9.5050  |

Enantiomeric excess: 81%, determined by HPLC (Daicel Chiralpak IG, hexane/isopropanol = 65/35, flow rate 0.8 mL/min, T = 25 °C, 240 nm):  $t_R = 21.296$ min (major),  $t_R = 23.696$  min (minor).

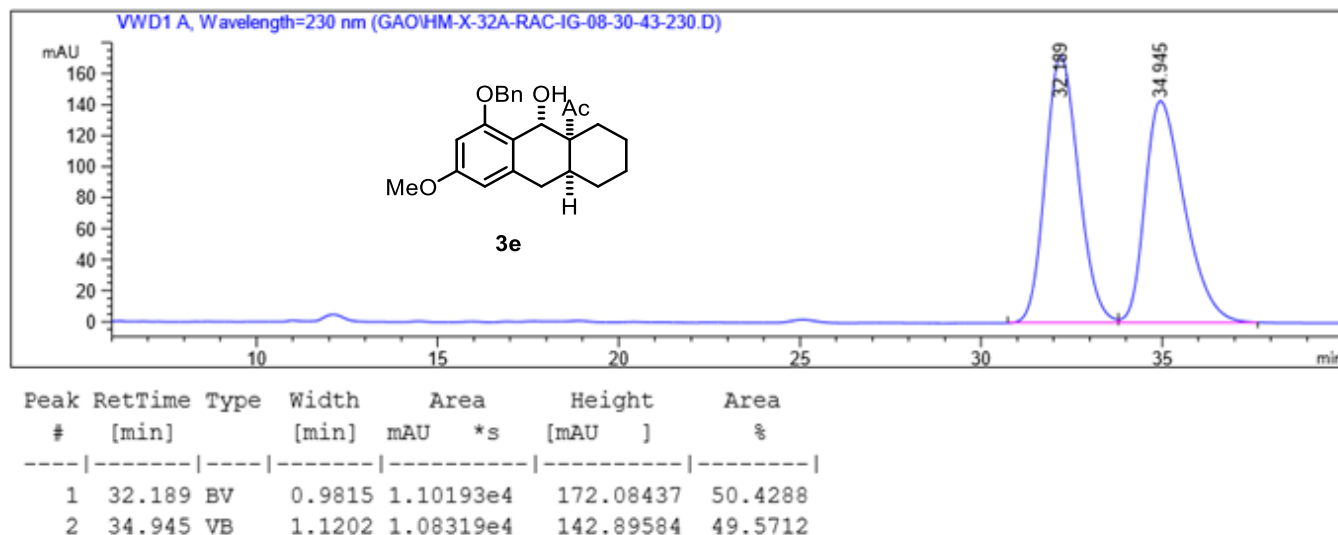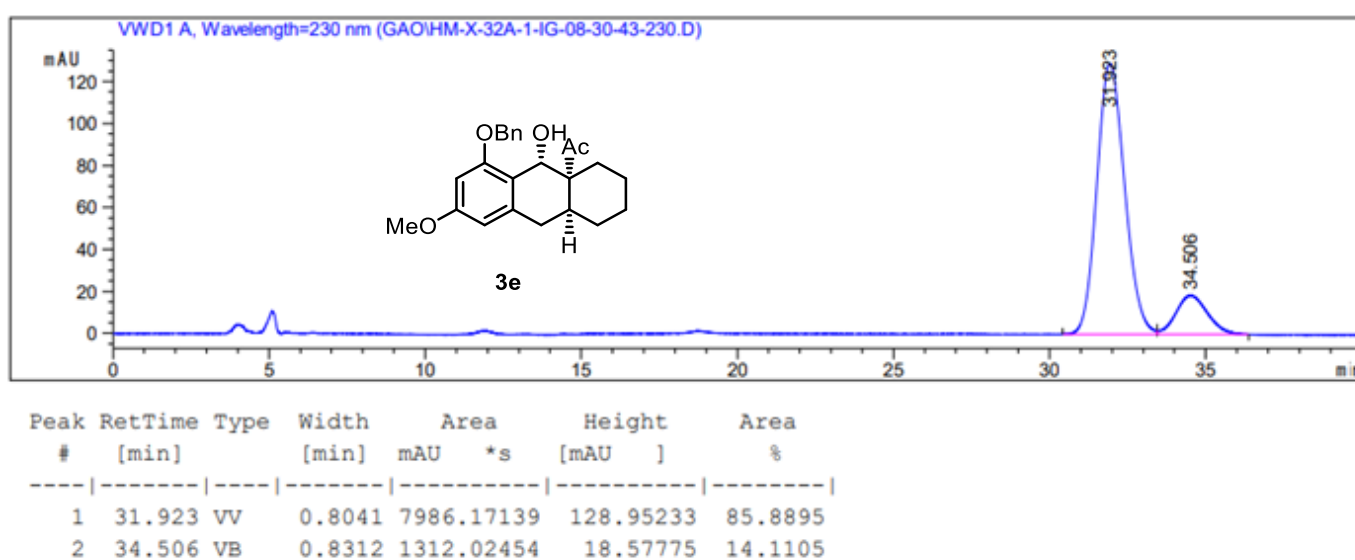

Enantiomeric excess: 72%, determined by HPLC (Daicel Chiralpak IG, hexane/isopropanol = 70/30, flow rate 0.8 mL/min, T = 25 °C, 230 nm):  $t_R = 31.923$  min (major),  $t_R = 34.506$  min (minor).

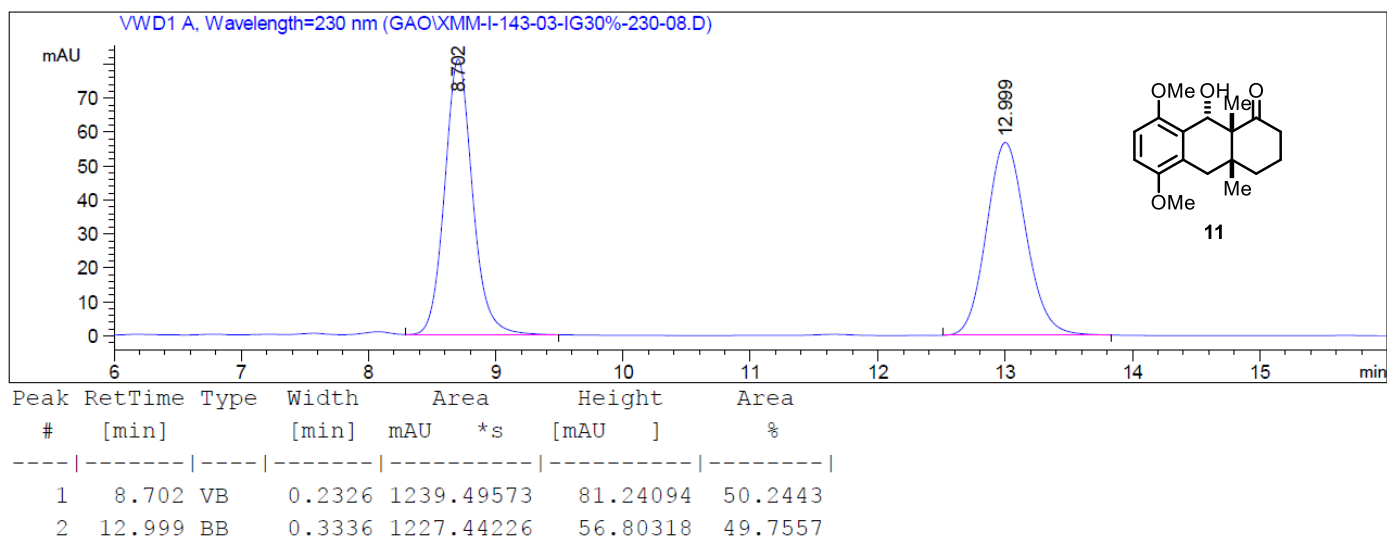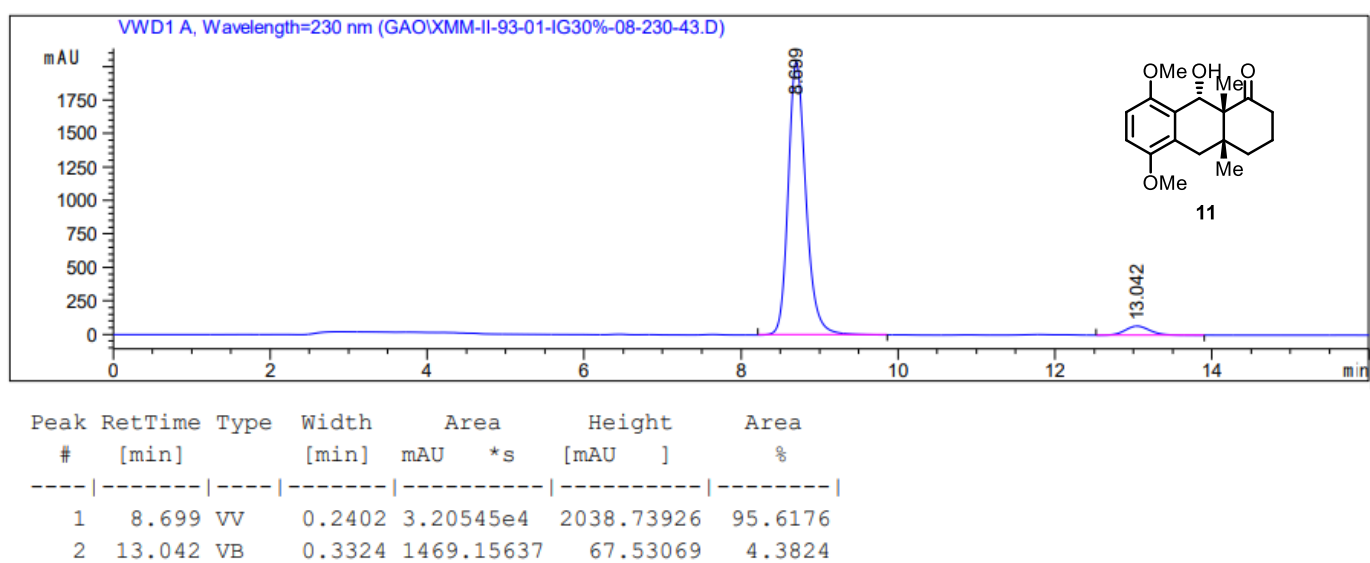

Enantiomeric excess: 91%, determined by HPLC (Daicel Chiralpak IG, hexane/isopropanol = 70/30, flow rate 0.8 mL/min, T = 25 °C, 230 nm):  $t_R$  = 8.699 min (major),  $t_R$  = 13.042 min (minor).

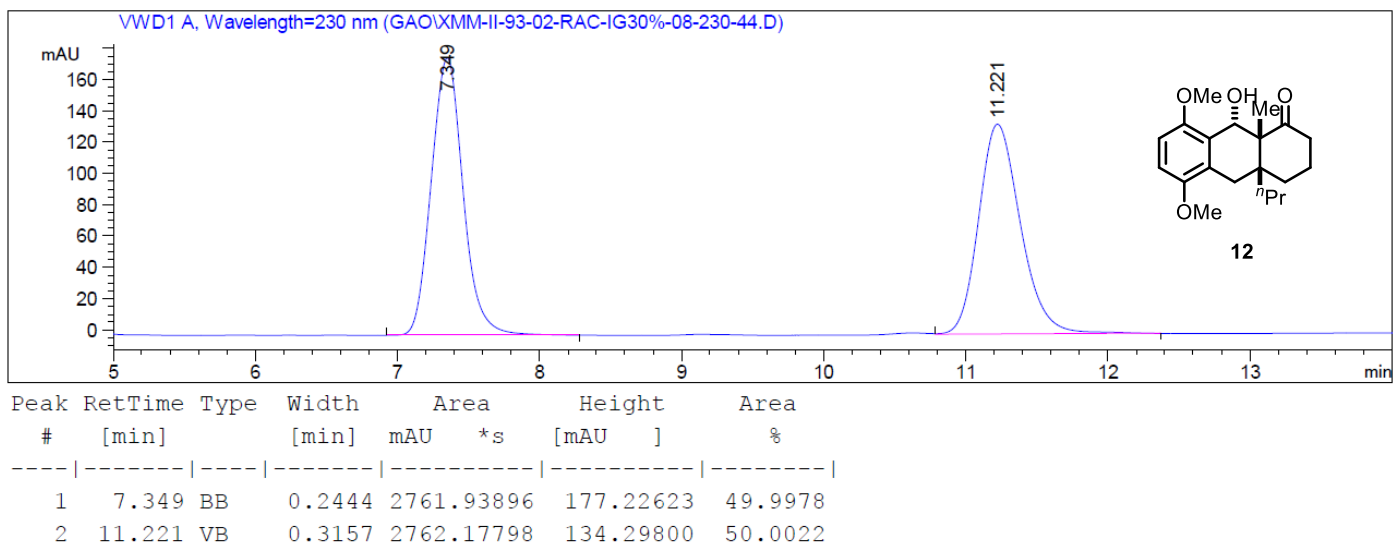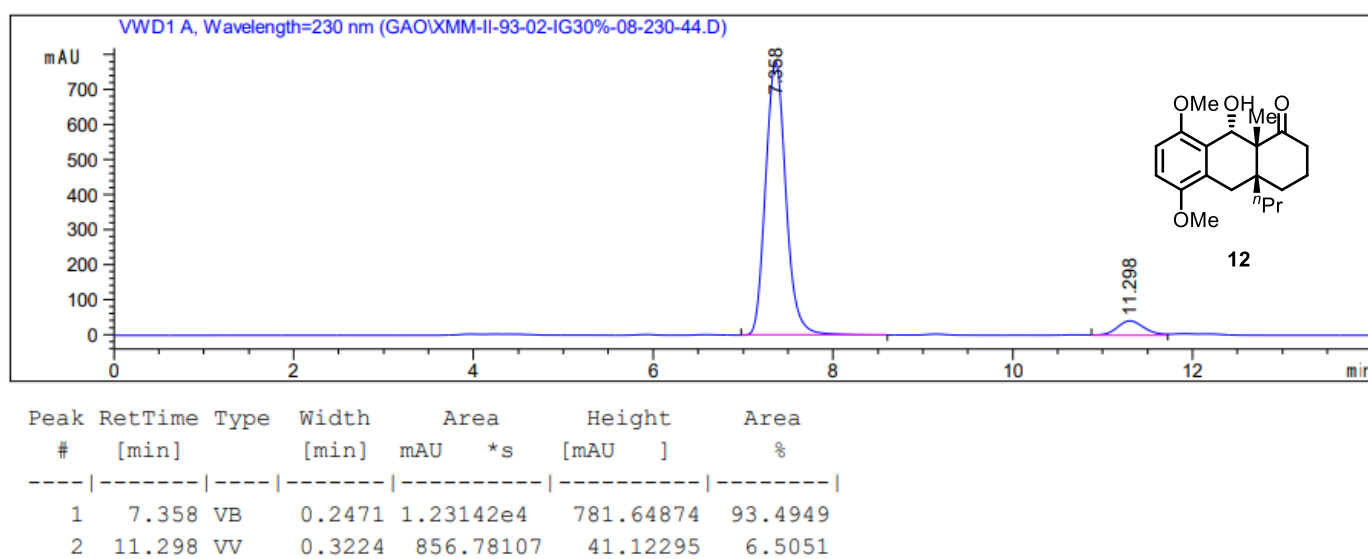

Enantiomeric excess: 87%, determined by HPLC (Daicel Chiralpak IG, hexane/isopropanol = 70/30, flow rate 0.8 mL/min, T = 25 °C, 230 nm):  $t_R = 7.358$  min (major),  $t_R = 11.298$  min (minor).

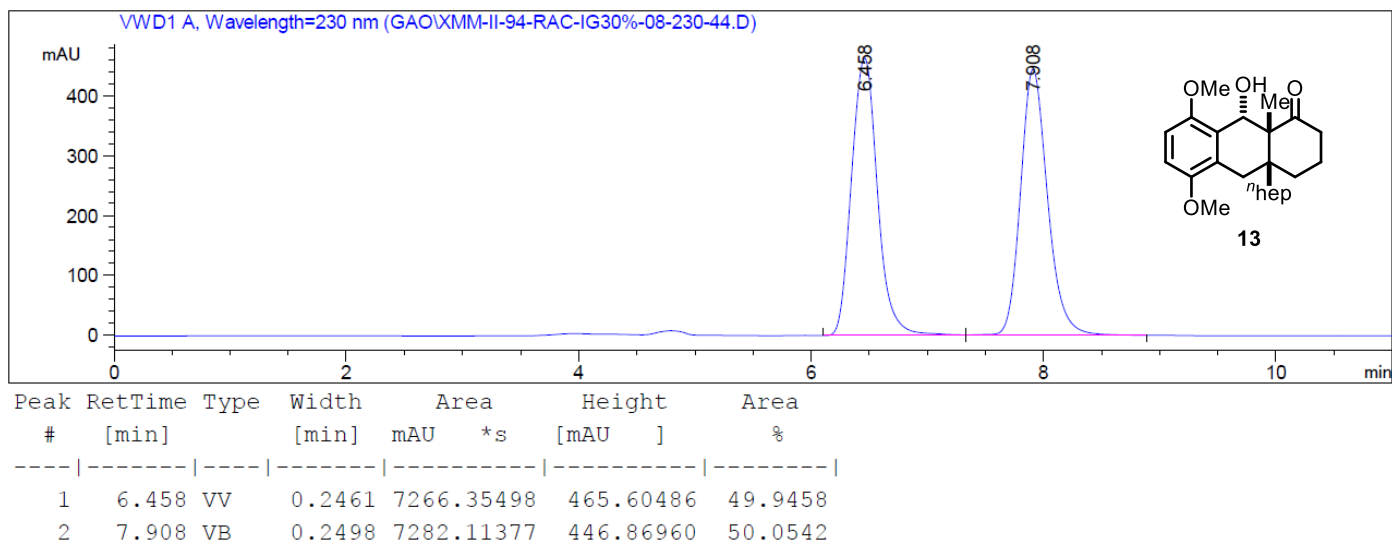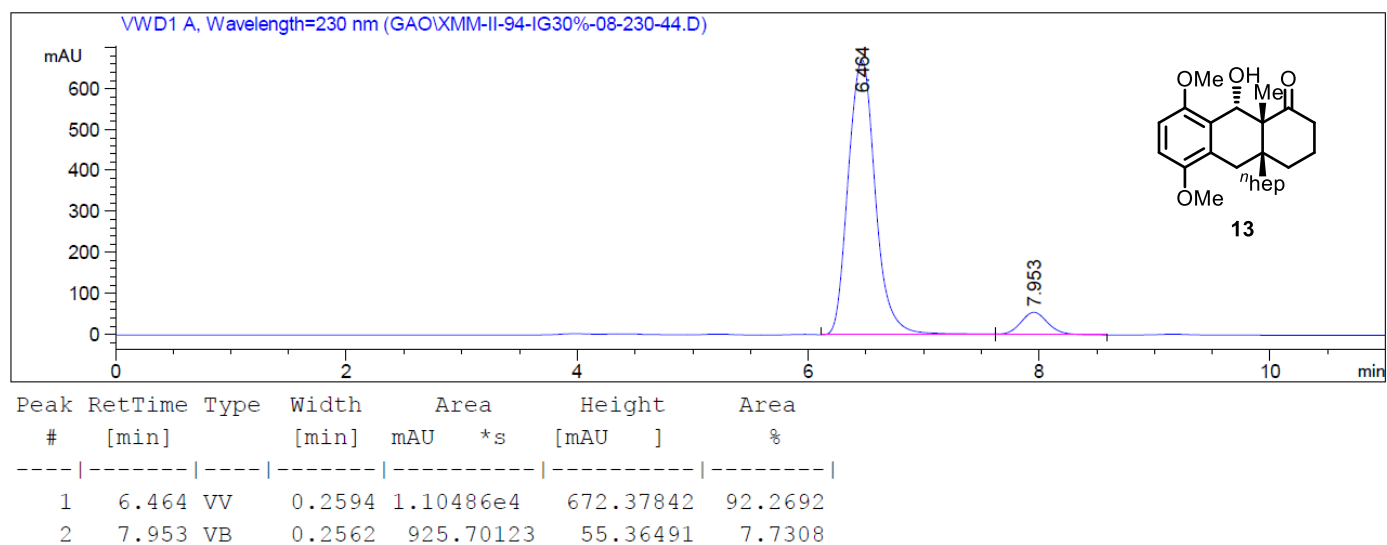

Enantiomeric excess: 85%, determined by HPLC (Daicel Chiralpak IG, hexane/isopropanol = 70/30, flow rate 0.8 mL/min, T = 25 °C, 230 nm):  $t_R = 6.464$  min (major),  $t_R = 7.953$  min (minor).

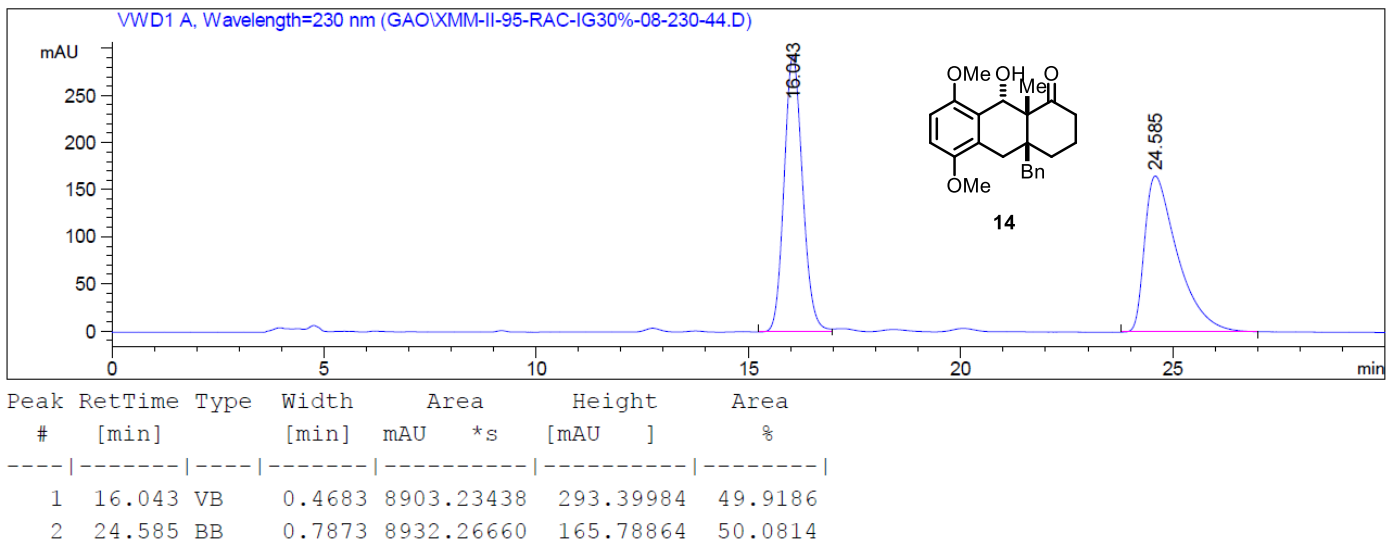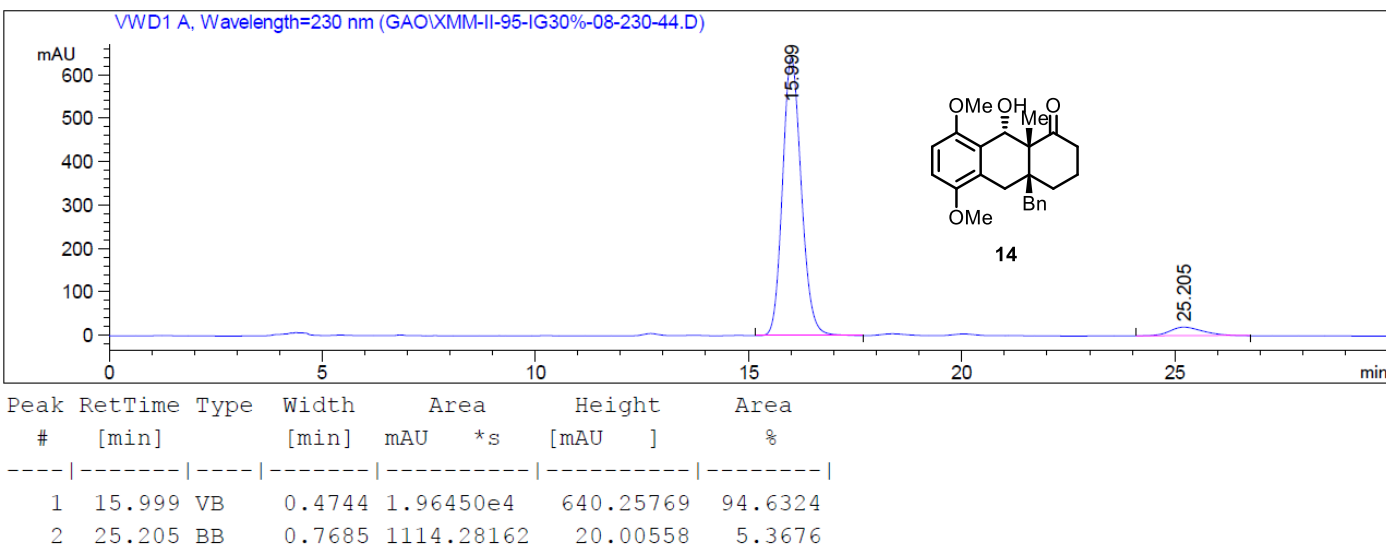

Enantiomeric excess: 89%, determined by HPLC (Daicel Chiralpak IG, hexane/isopropanol = 70/30, flow rate 0.8 mL/min, T = 25 °C, 230 nm):  $t_R = 15.999$  min (major),  $t_R = 25.205$  min (minor).

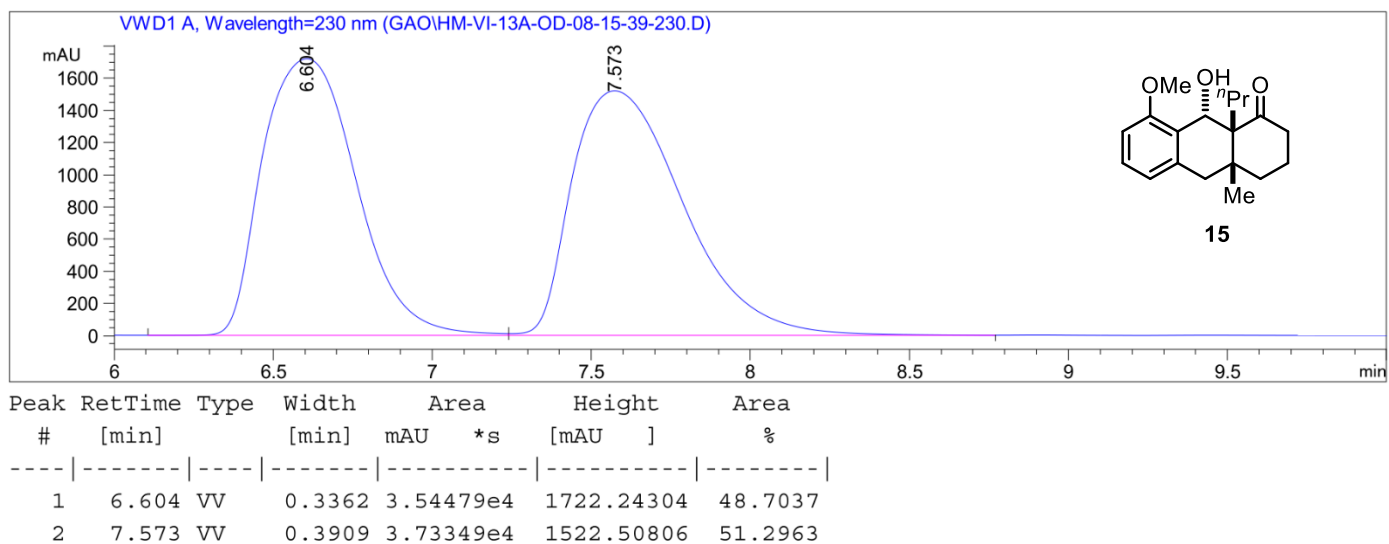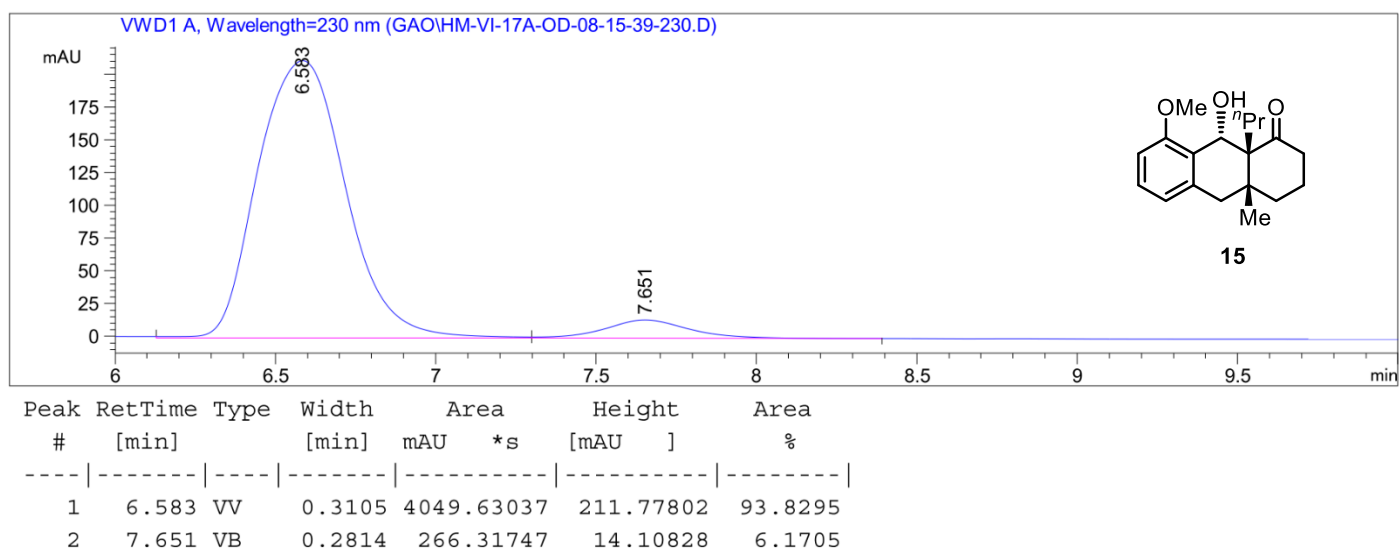

Enantiomeric excess: 88%, determined by HPLC (Daicel Chiralpak OD-H, hexane/isopropanol = 85/15, flow rate 0.8 mL/min, T = 25 °C, 230 nm):  $t_R = 6.583$ min (major),  $t_R = 7.651$  min (minor).



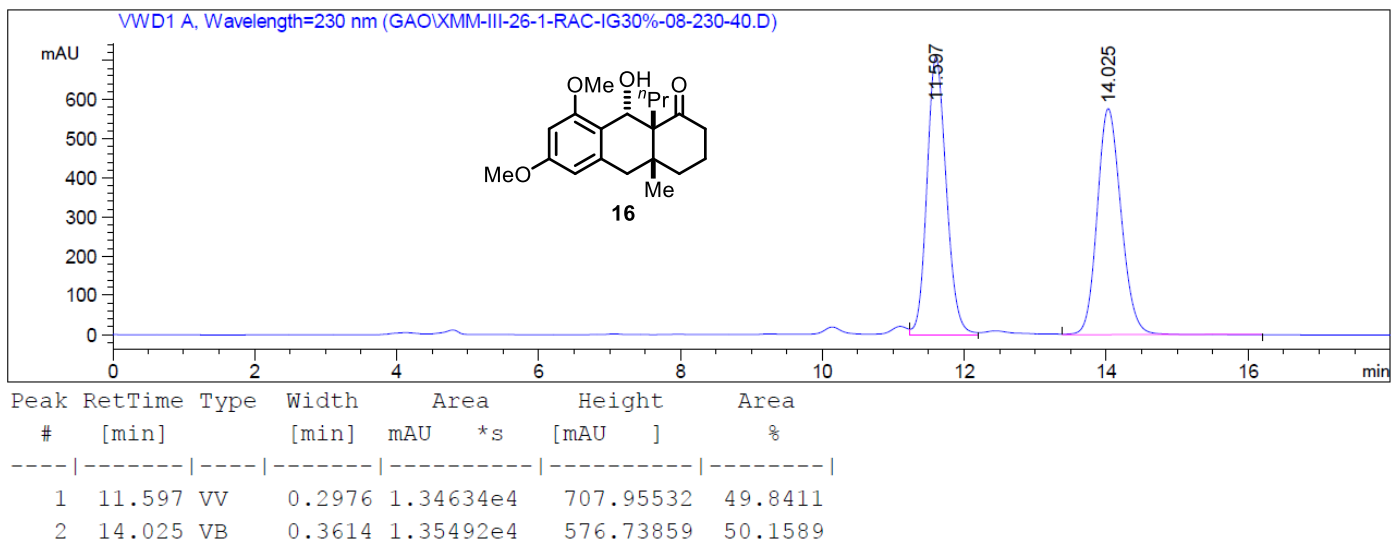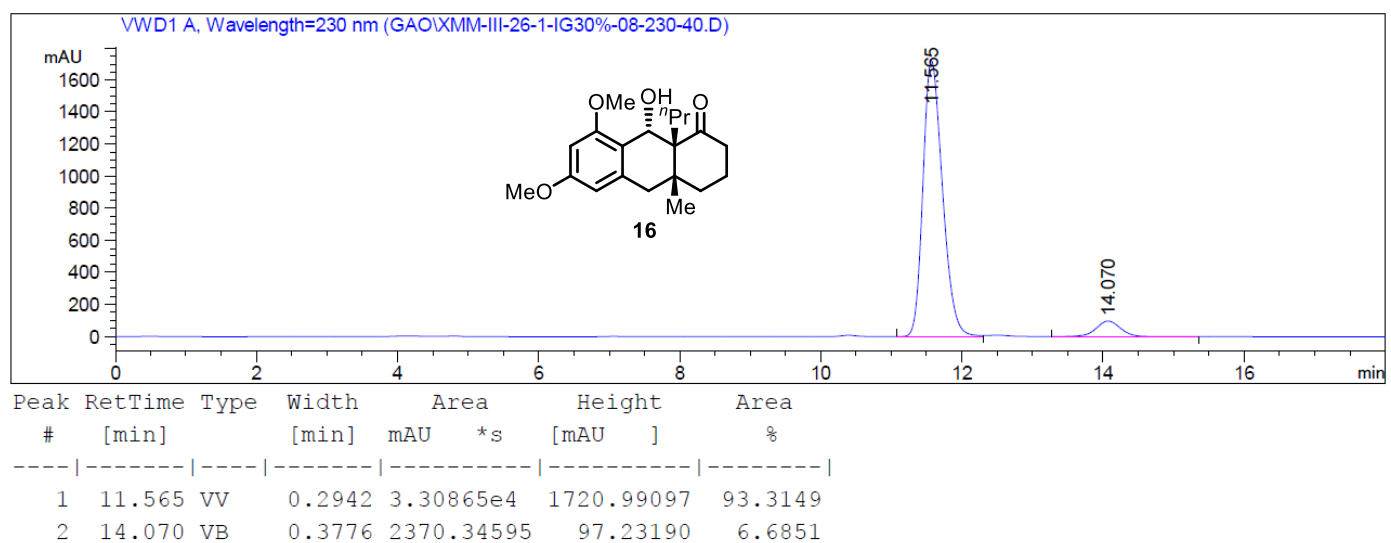

Enantiomeric excess: 87%, determined by HPLC (Daicel Chiralpak IG, hexane/isopropanol = 70/30, flow rate 0.8 mL/min, T = 25 °C, 230 nm):  $t_R = 10.241$  min (minor),  $t_R = 13.851$  min (major).

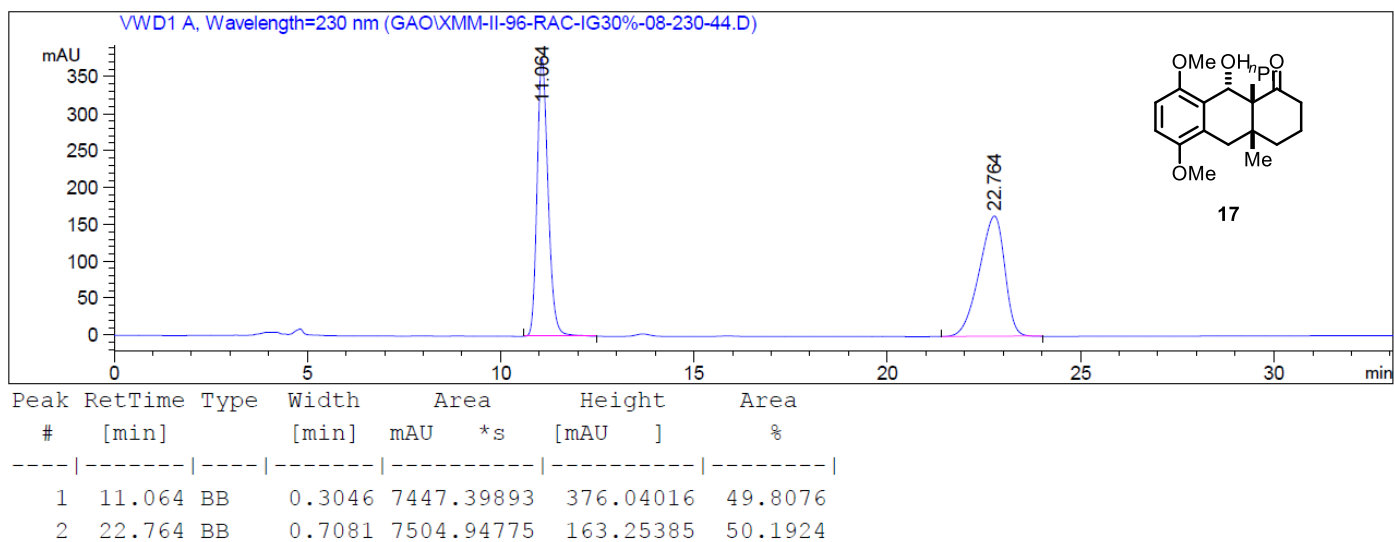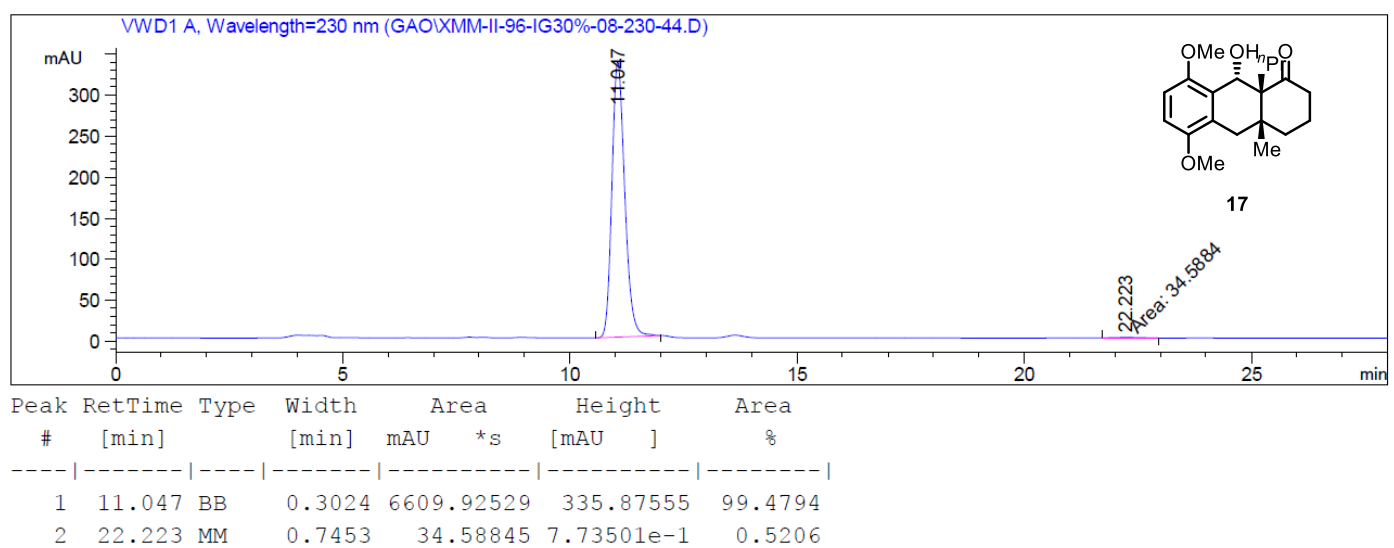

Enantiomeric excess: 99%, determined by HPLC (Daicel Chiralpak IG, hexane/isopropanol = 70/30, flow rate 0.8 mL/min, T = 25 °C, 230 nm):  $t_R = 11.047$  min (major),  $t_R = 22.223$  min (minor).

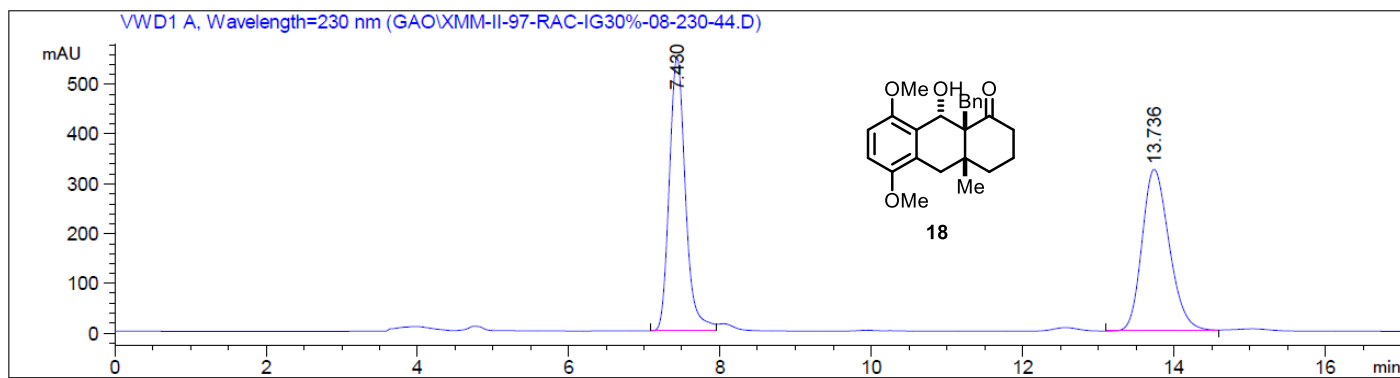

| Peak # | RetTime [min] | Type | Width [min] | Area mAU   | Area *s | Height [mAU] | Area %  |
|--------|---------------|------|-------------|------------|---------|--------------|---------|
| 1      | 7.430         | VV   | 0.2296      | 8182.88623 |         | 550.22595    | 50.0690 |
| 2      | 13.736        | VV   | 0.3889      | 8160.32617 |         | 325.18521    | 49.9310 |

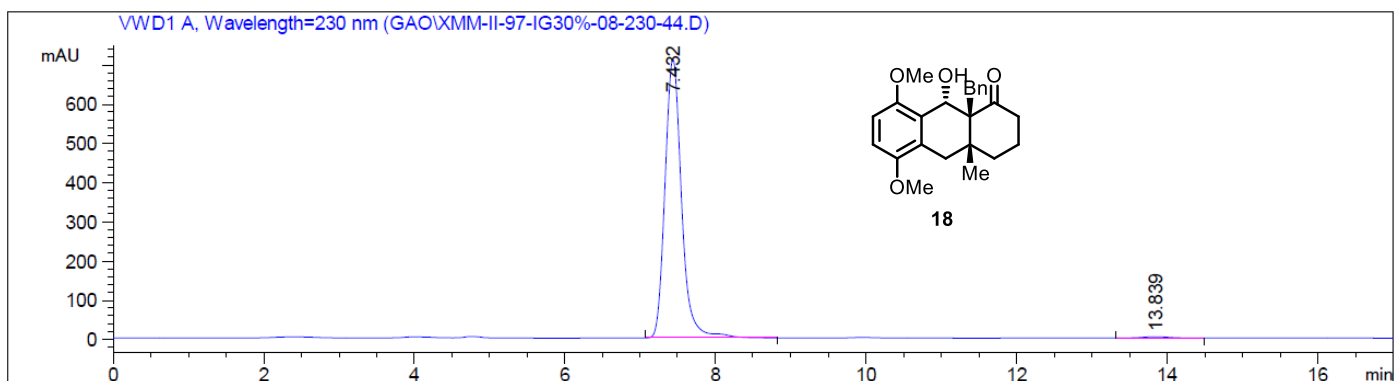

| Peak # | RetTime [min] | Type | Width [min] | Area mAU  | Area *s | Height [mAU] | Area %  |
|--------|---------------|------|-------------|-----------|---------|--------------|---------|
| 1      | 7.432         | BB   | 0.2369      | 1.08857e4 |         | 710.78900    | 99.2580 |
| 2      | 13.839        | BB   | 0.3317      | 81.37498  |         | 3.27091      | 0.7420  |

Enantiomeric excess: 99%, determined by HPLC (Daicel Chiralpak IG, hexane/isopropanol = 70/30, flow rate 0.8 mL/min, T = 25 °C, 230 nm):  $t_R = 7.432$  min (major),  $t_R = 13.839$  min (minor).

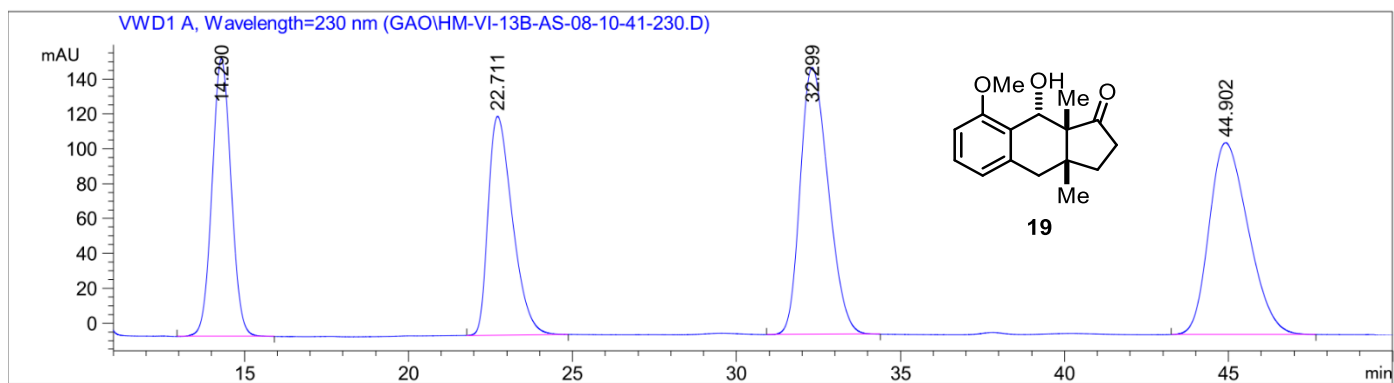

| Peak # | RetTime [min] | Type | Width [min] | Area mAU   | Area *s   | Height [mAU] | Area %  |
|--------|---------------|------|-------------|------------|-----------|--------------|---------|
| 1      | 14.290        | VB   | 0.6318      | 6440.63379 | 159.32704 | 159.32704    | 20.6731 |
| 2      | 22.711        | BB   | 0.7958      | 6467.65430 | 125.61745 | 125.61745    | 20.7598 |
| 3      | 32.299        | VB   | 0.9326      | 9104.18652 | 153.09525 | 153.09525    | 29.2225 |
| 4      | 44.902        | BB   | 1.2984      | 9142.24902 | 110.03580 | 110.03580    | 29.3447 |

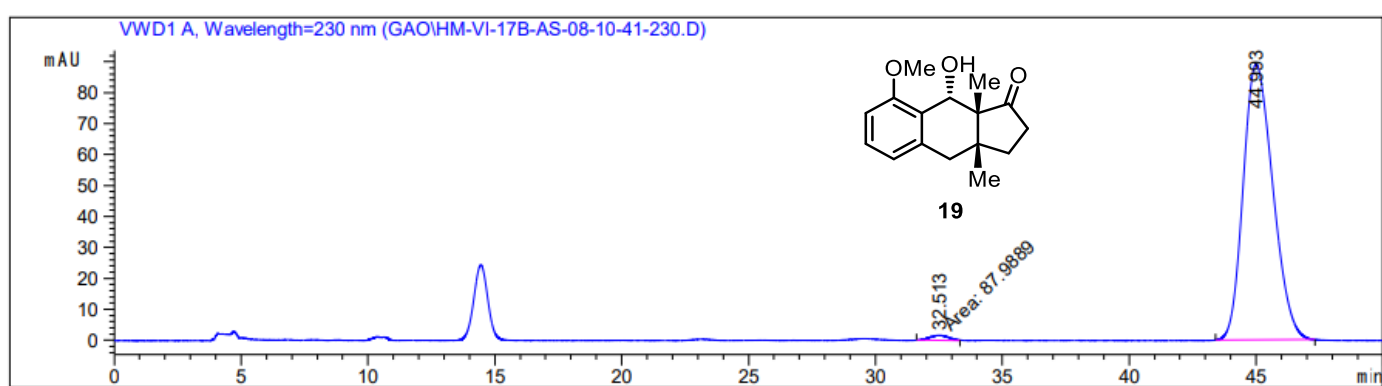

| Peak # | RetTime [min] | Type | Width [min] | Area mAU   | Area *s  | Height [mAU] | Area %  |
|--------|---------------|------|-------------|------------|----------|--------------|---------|
| 1      | 32.513        | MM   | 0.8882      | 87.98892   | 1.65107  | 1.65107      | 1.1990  |
| 2      | 44.993        | BB   | 1.1531      | 7250.47559 | 89.11454 | 89.11454     | 98.8010 |

Enantiomeric excess: 98%, determined by HPLC (Daicel Chiralpak AS-H, hexane/isopropanol = 90/10, flow rate 0.8 mL/min, T = 25 °C, 230 nm):  $t_R = 32.496$  min (minor),  $t_R = 44.993$  min (major).

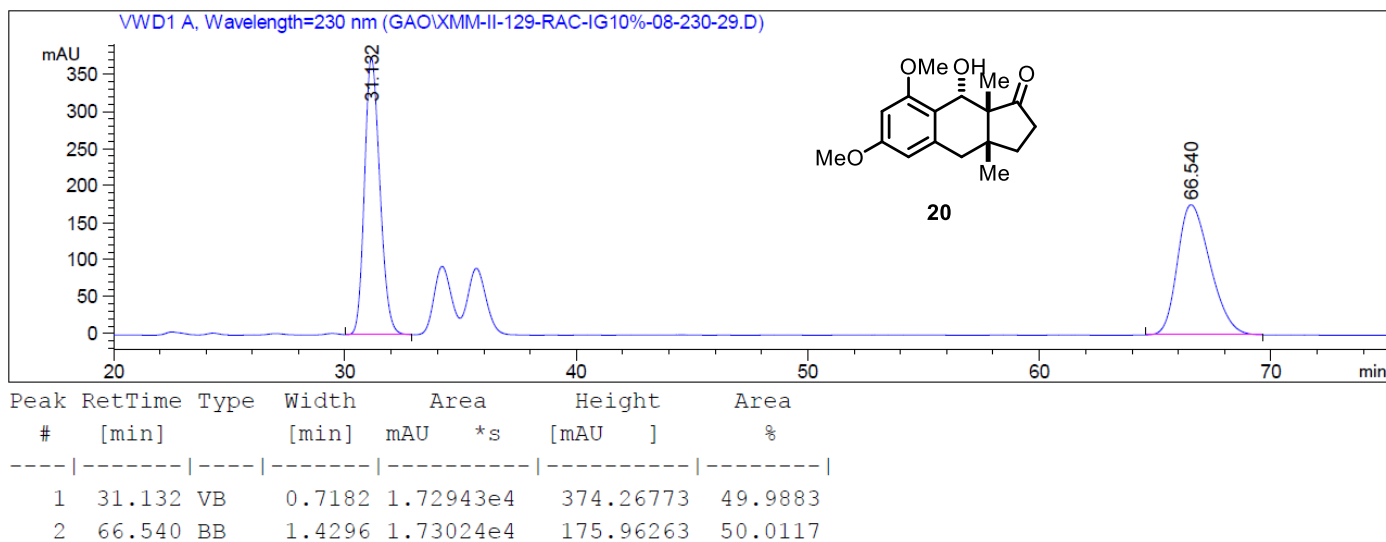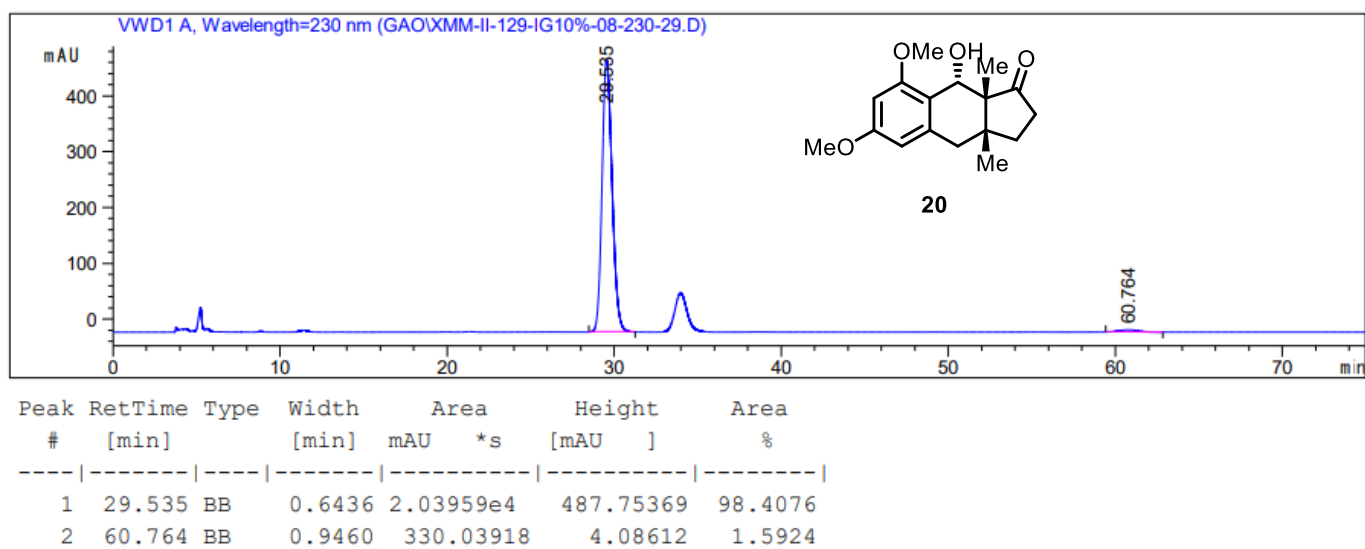

Enantiomeric excess: 97%, determined by HPLC (Daicel Chiralpak IG, hexane/isopropanol = 90/10, flow rate 0.8 mL/min, T = 25 °C, 230 nm):  $t_R = 29.535$  min (minor),  $t_R = 60.764$  min (major).

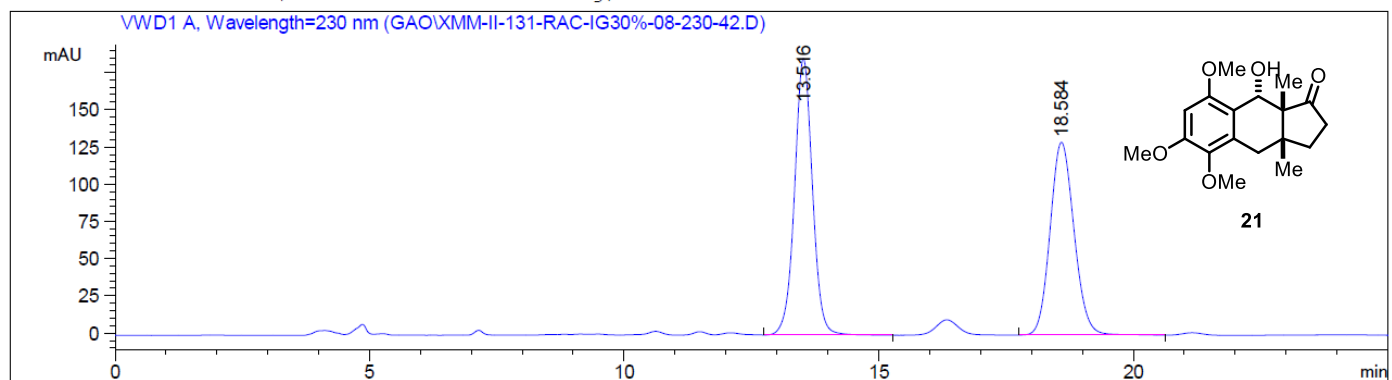

| Peak # | RetTime [min] | Type | Width [min] | Area mAU *s | Height [mAU] | Area %  |
|--------|---------------|------|-------------|-------------|--------------|---------|
| 1      | 13.516        | VB   | 0.3741      | 4571.07715  | 185.97832    | 51.7102 |
| 2      | 18.584        | BV   | 0.5062      | 4268.71631  | 129.73679    | 48.2898 |

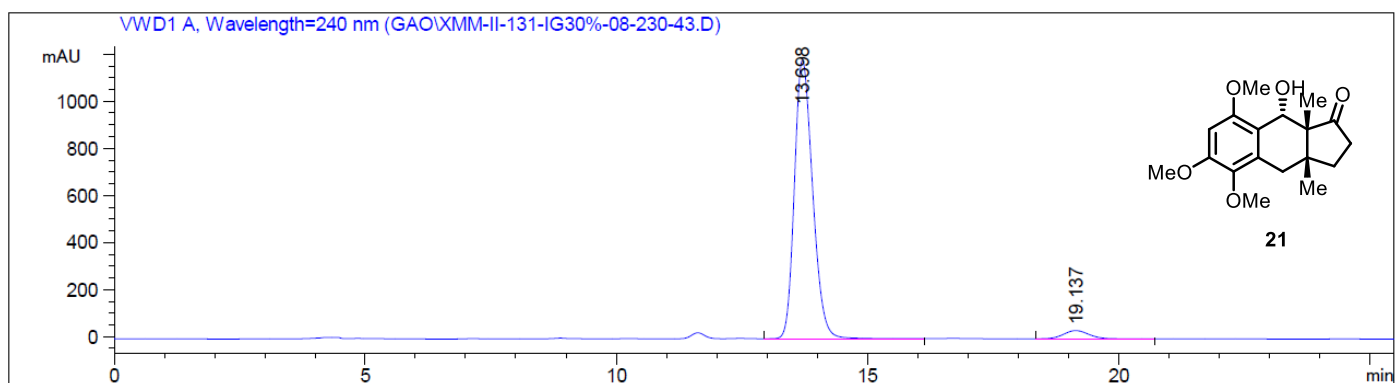

| Peak # | RetTime [min] | Type | Width [min] | Area mAU *s | Height [mAU] | Area %  |
|--------|---------------|------|-------------|-------------|--------------|---------|
| 1      | 13.698        | VV   | 0.3887      | 2.99810e4   | 1183.42285   | 95.9030 |
| 2      | 19.137        | BB   | 0.5562      | 1280.78699  | 35.38463     | 4.0970  |

Enantiomeric excess: 92%, determined by HPLC (Daicel Chiralpak IG, hexane/isopropanol = 70/30, flow rate 0.8 mL/min, T = 25 °C, 230 nm):  $t_R = 13.698$  min (major),  $t_R = 19.137$  min (minor).

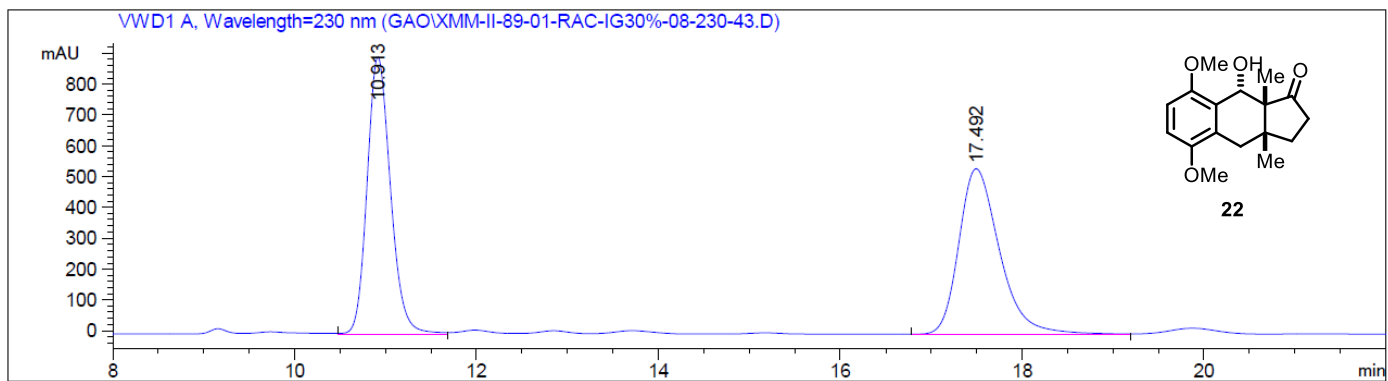

| Peak # | RetTime [min] | Type | Width [min] | Area mAU *s | Height [mAU] | Area %  |
|--------|---------------|------|-------------|-------------|--------------|---------|
| 1      | 10.913        | BV   | 0.2754      | 1.60520e4   | 898.58929    | 49.0307 |
| 2      | 17.492        | BV   | 0.4764      | 1.66867e4   | 536.55139    | 50.9693 |

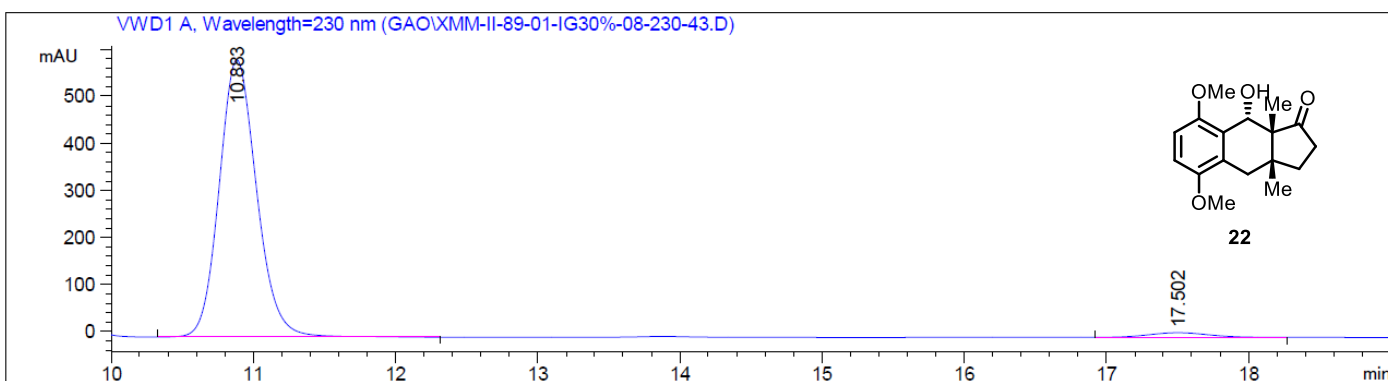

| Peak # | RetTime [min] | Type | Width [min] | Area mAU *s | Height [mAU] | Area %  |
|--------|---------------|------|-------------|-------------|--------------|---------|
| 1      | 10.883        | BB   | 0.2827      | 1.08270e4   | 589.56323    | 97.3873 |
| 2      | 17.502        | BB   | 0.4412      | 290.46341   | 9.92347      | 2.6127  |

Enantiomeric excess: 95%, determined by HPLC (Daicel Chiralpak IG, hexane/isopropanol = 70/30, flow rate 0.8 mL/min, T = 25 °C, 230 nm):  $t_R = 10.883$ min (major),  $t_R = 17.052$  min (minor).

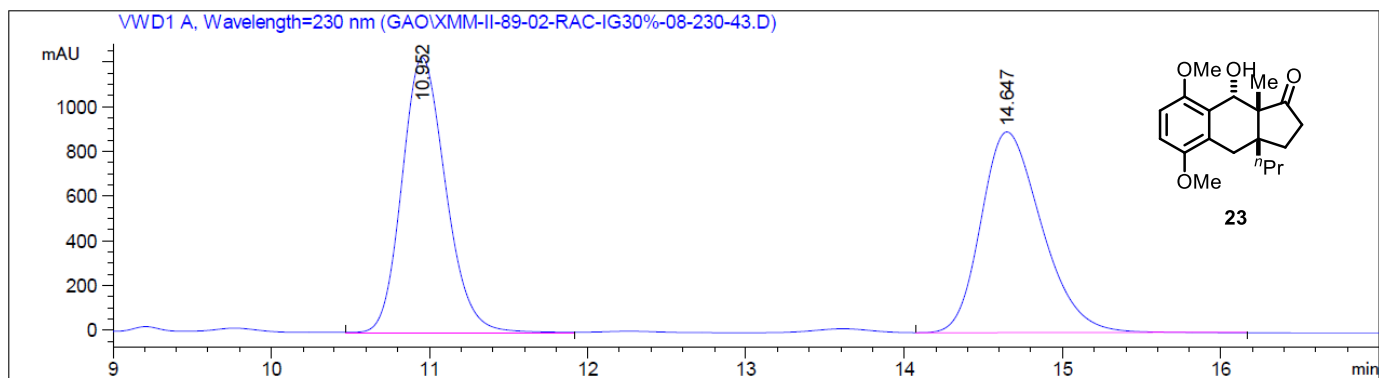

| Peak # | RetTime [min] | Type | Width [min] | Area mAU *s | Height [mAU] | Area %  |
|--------|---------------|------|-------------|-------------|--------------|---------|
| 1      | 10.952        | VV   | 0.2991      | 2.37396e4   | 1231.75000   | 49.6729 |
| 2      | 14.647        | VB   | 0.4135      | 2.40522e4   | 898.60345    | 50.3271 |

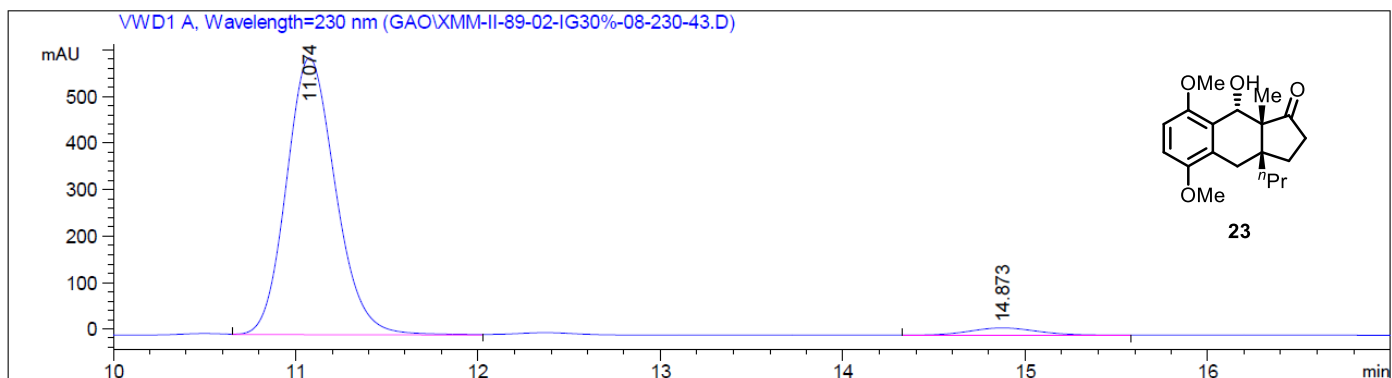

| Peak # | RetTime [min] | Type | Width [min] | Area mAU *s | Height [mAU] | Area %  |
|--------|---------------|------|-------------|-------------|--------------|---------|
| 1      | 11.074        | VB   | 0.2895      | 1.11715e4   | 595.37744    | 96.5600 |
| 2      | 14.873        | BB   | 0.3948      | 397.98874   | 15.54604     | 3.4400  |

Enantiomeric excess: 93%, determined by HPLC (Daicel Chiralpak IG, hexane/isopropanol = 70/30, flow rate 0.8 mL/min, T = 25 °C, 230 nm):  $t_R = 11.074$  min (major),  $t_R = 14.873$  min (minor).



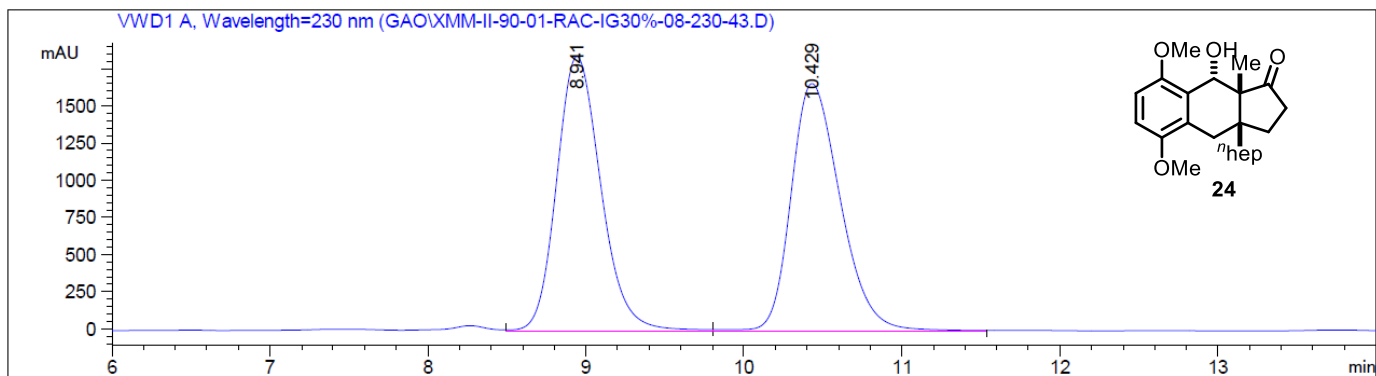

| Peak # | RetTime [min] | Type | Width [min] | Area mAU *s | Height [mAU] | Area %  |
|--------|---------------|------|-------------|-------------|--------------|---------|
| 1      | 8.941         | VV   | 0.3019      | 3.60145e4   | 1846.08203   | 49.8897 |
| 2      | 10.429        | VV   | 0.3359      | 3.61738e4   | 1663.67249   | 50.1103 |

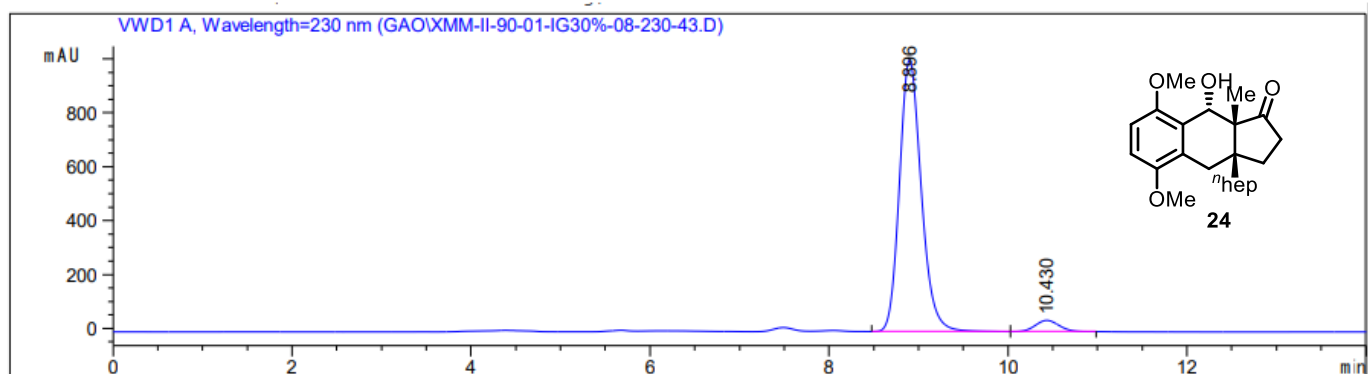

| Peak # | RetTime [min] | Type | Width [min] | Area mAU *s | Height [mAU] | Area %  |
|--------|---------------|------|-------------|-------------|--------------|---------|
| 1      | 8.896         | VV   | 0.2612      | 1.71091e4   | 1008.81042   | 95.5961 |
| 2      | 10.430        | VB   | 0.2896      | 788.18201   | 42.13999     | 4.4039  |

Enantiomeric excess: 91%, determined by HPLC (Daicel Chiralpak IG, hexane/isopropanol = 70/30, flow rate 0.8 mL/min, T = 25 °C, 230 nm):  $t_R = 8.896$  min (major),  $t_R = 10.430$  min (minor).

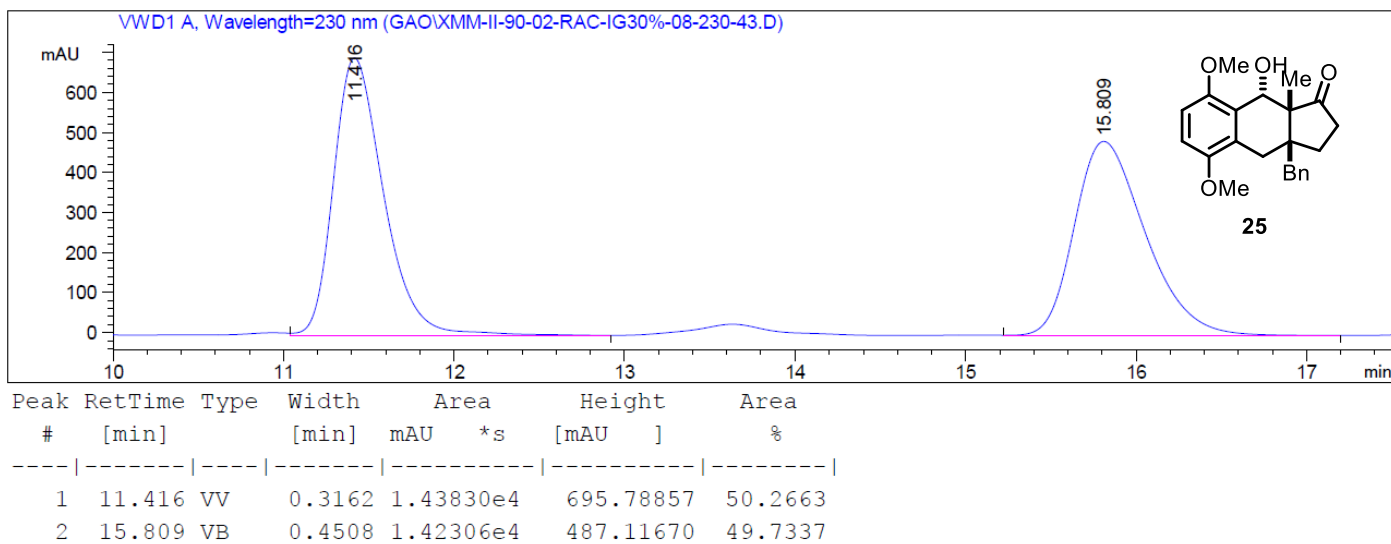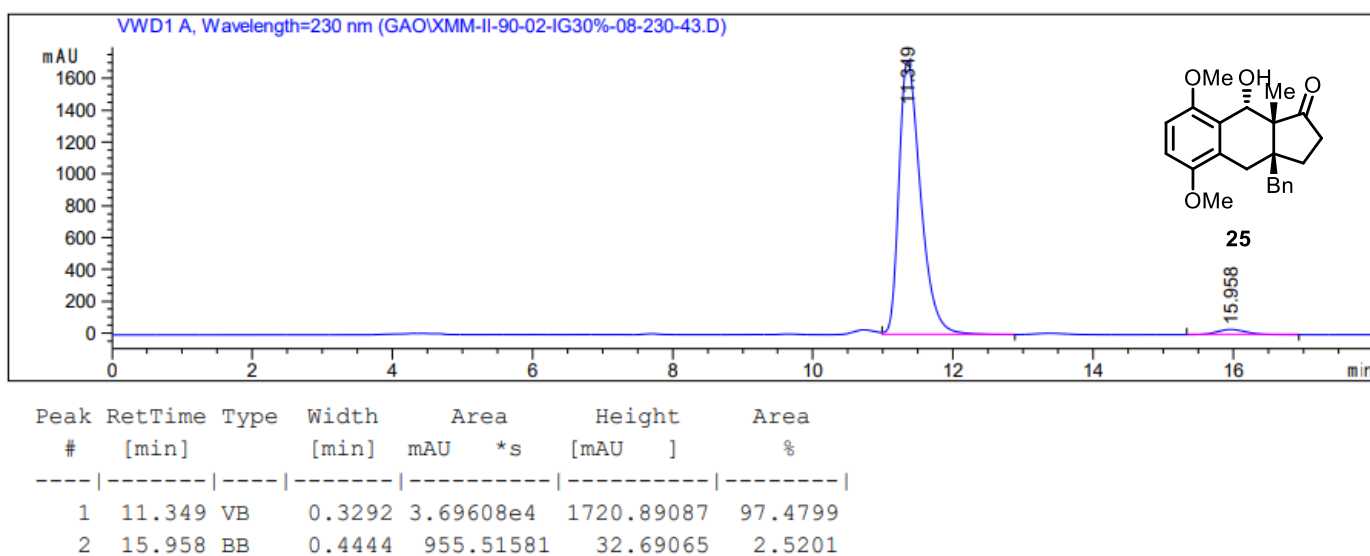

Enantiomeric excess: 95%, determined by HPLC (Daicel Chiralpak IG, hexane/isopropanol = 70/30, flow rate 0.8 mL/min, T = 25 °C, 230 nm):  $t_R = 11.349$  min (major),  $t_R = 15.958$  min (minor).

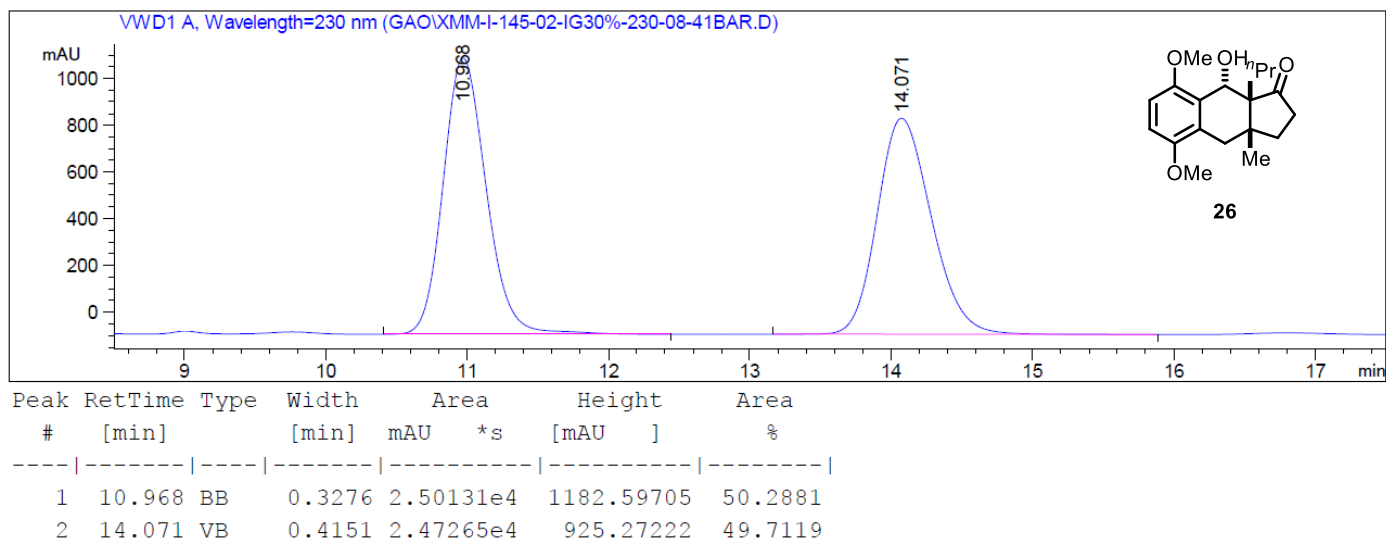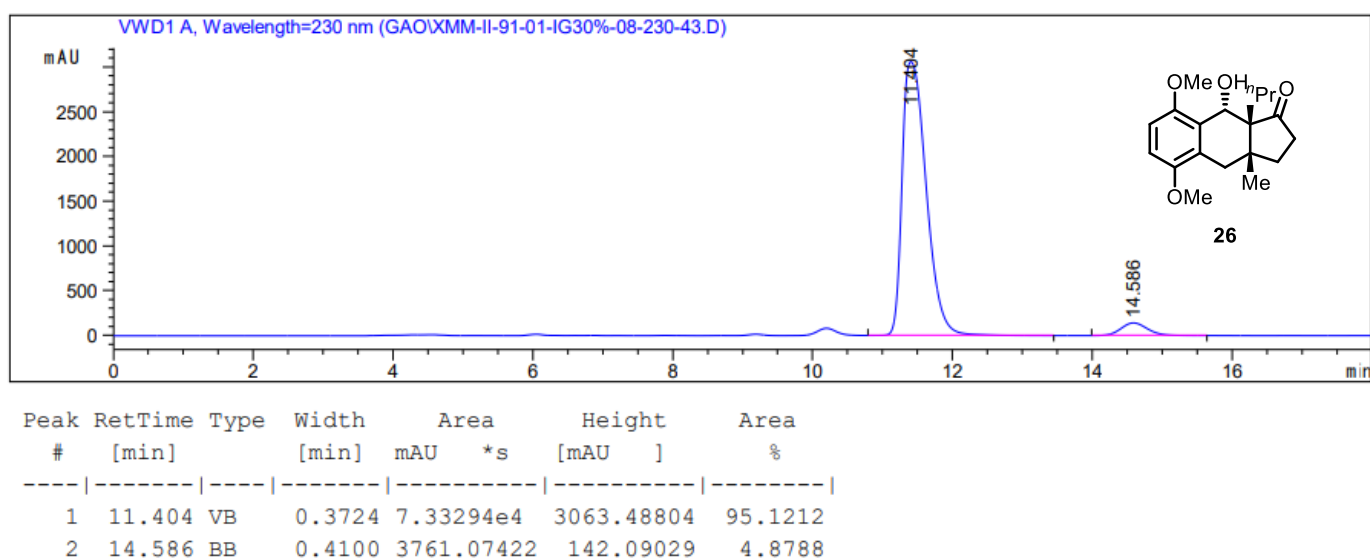

Enantiomeric excess: 90%, determined by HPLC (Daicel Chiralpak IG, hexane/isopropanol = 70/30, flow rate 0.8 mL/min, T = 25 °C, 230 nm):  $t_R$  = 11.404 min (major),  $t_R$  = 14.586 min (minor).

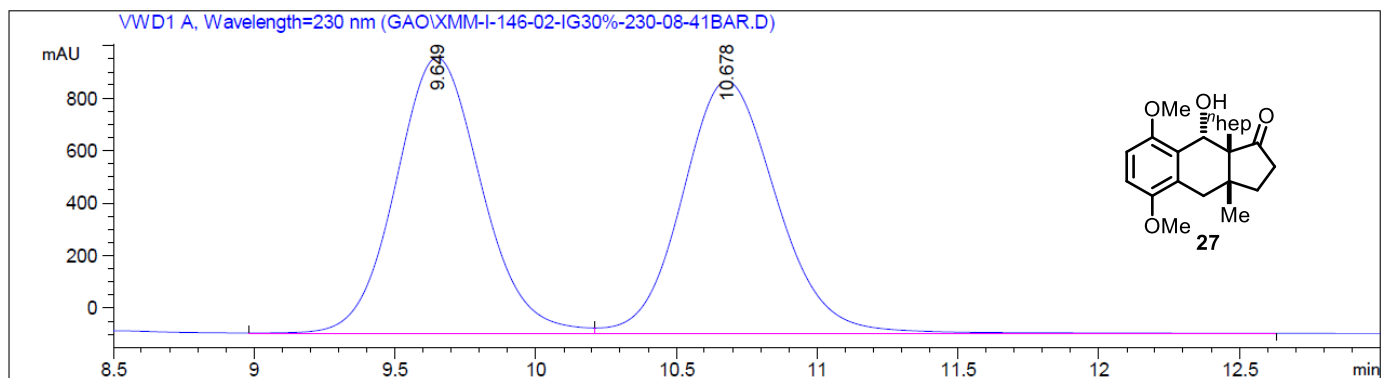

| Peak # | RetTime [min] | Type | Width [min] | Area mAU *s | Height [mAU] | Area %  |
|--------|---------------|------|-------------|-------------|--------------|---------|
| 1      | 9.649         | VV   | 0.3275      | 2.23016e4   | 1051.52698   | 49.6263 |
| 2      | 10.678        | VB   | 0.3606      | 2.24790e4   | 962.22943    | 50.0210 |

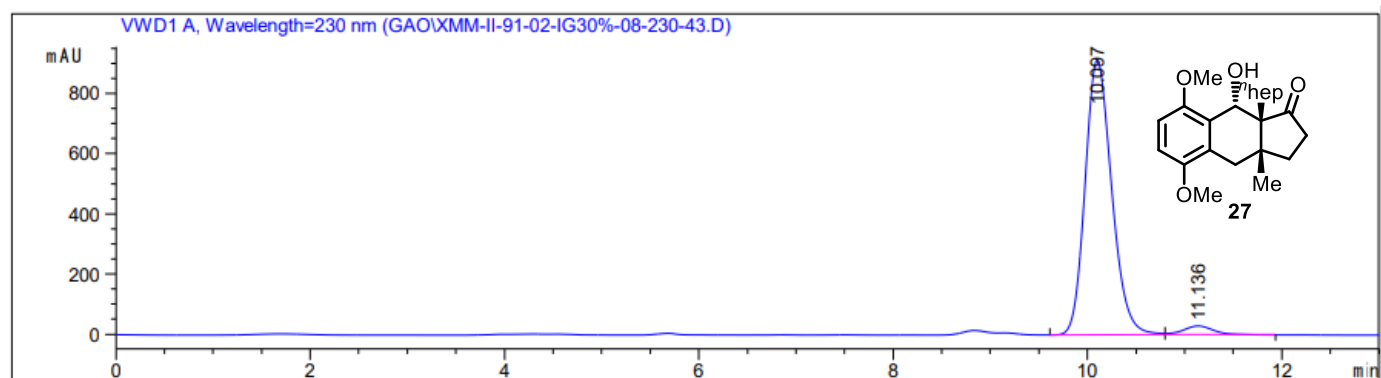

| Peak # | RetTime [min] | Type | Width [min] | Area mAU *s | Height [mAU] | Area %  |
|--------|---------------|------|-------------|-------------|--------------|---------|
| 1      | 10.097        | BV   | 0.2955      | 1.74167e4   | 912.51208    | 96.2408 |
| 2      | 11.136        | VB   | 0.3415      | 680.31110   | 29.94142     | 3.7592  |

Enantiomeric excess: 93%, determined by HPLC (Daicel Chiralpak IG, hexane/isopropanol = 70/30, flow rate 0.8 mL/min, T = 25 °C, 230 nm):  $t_R = 10.097$  min (major),  $t_R = 11.136$  min (minor).

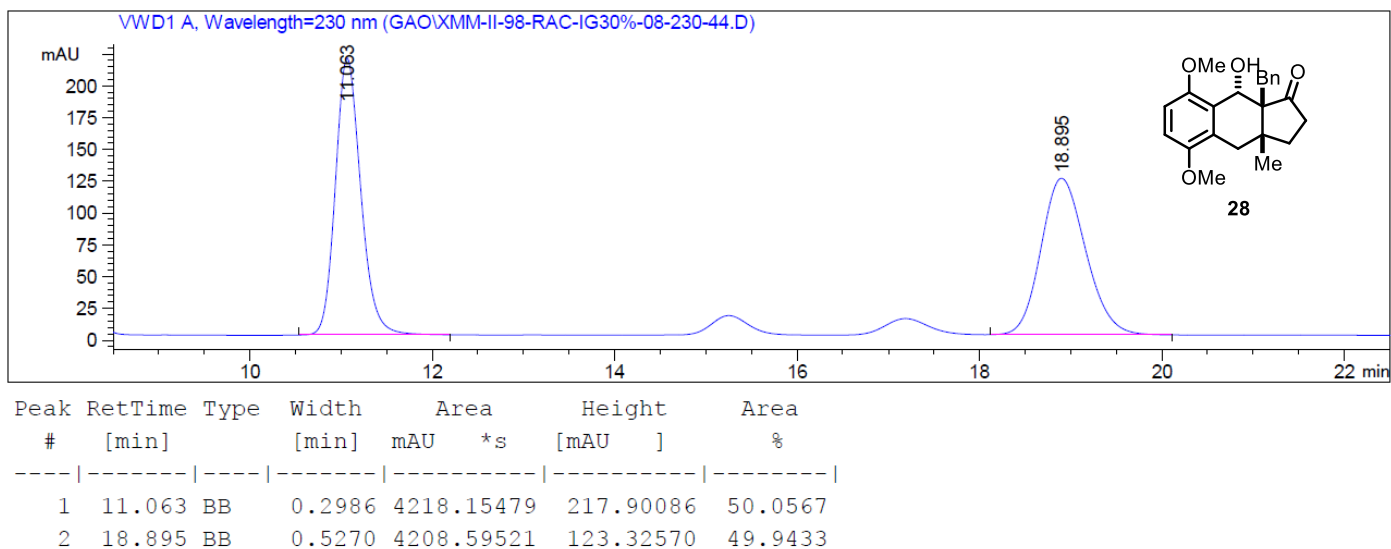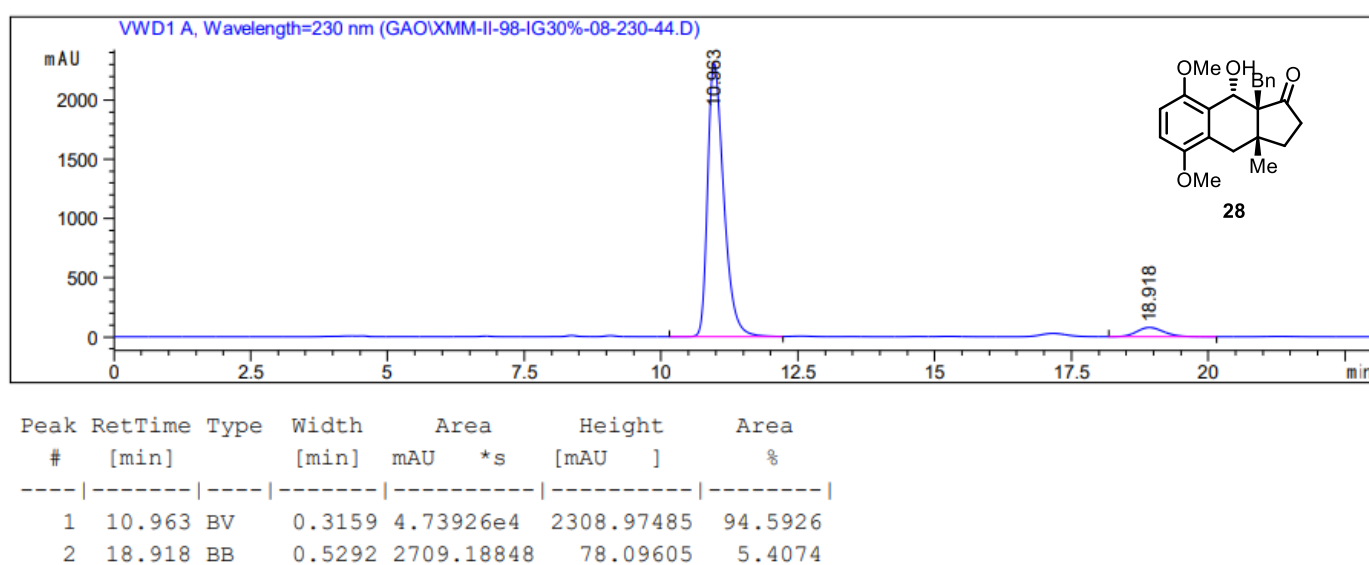

Enantiomeric excess: 89%, determined by HPLC (Daicel Chiralpak IG, hexane/isopropanol = 70/30, flow rate 0.8 mL/min, T = 25 °C, 230 nm):  $t_R = 10.963$  min (major),  $t_R = 18.918$  min (minor).

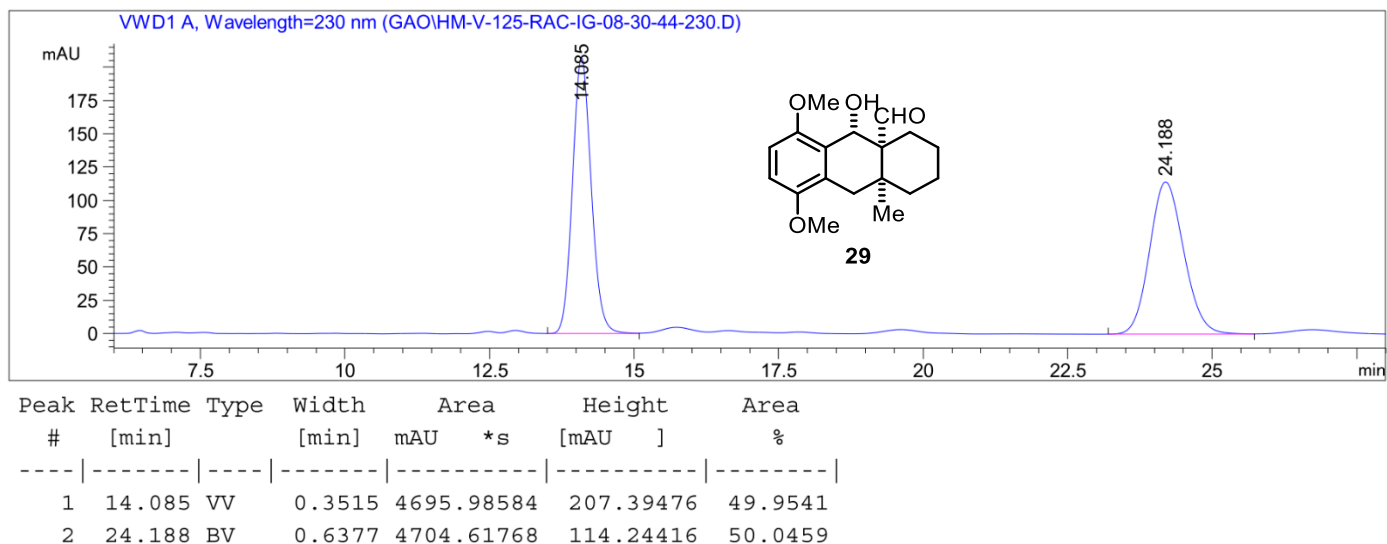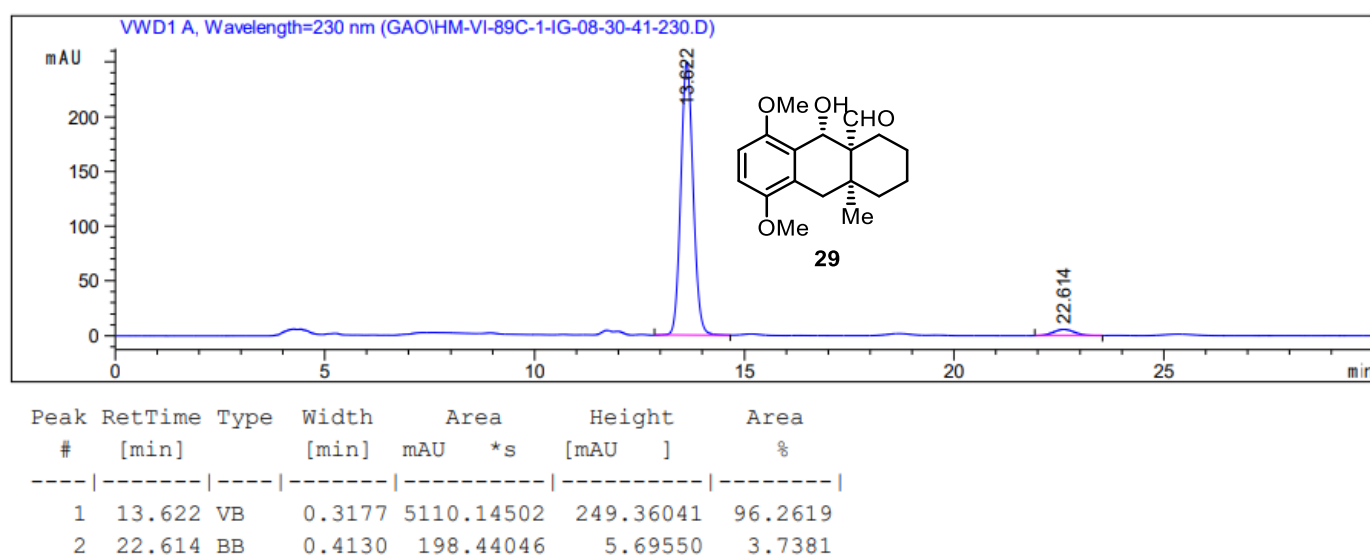

Enantiomeric excess: 93%, determined by HPLC (Daicel Chiralpak IG, hexane/isopropanol = 70/30, flow rate 0.8 mL/min, T = 25 °C, 230 nm):  $t_R = 13.622$ min (major),  $t_R = 22.610$  min (minor).

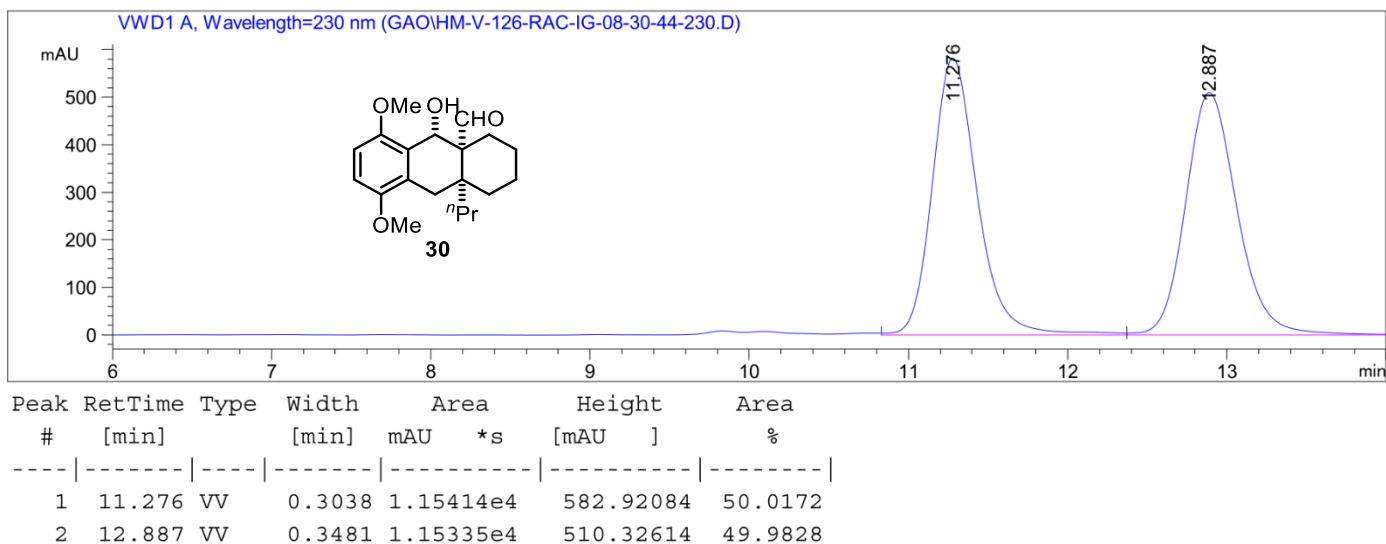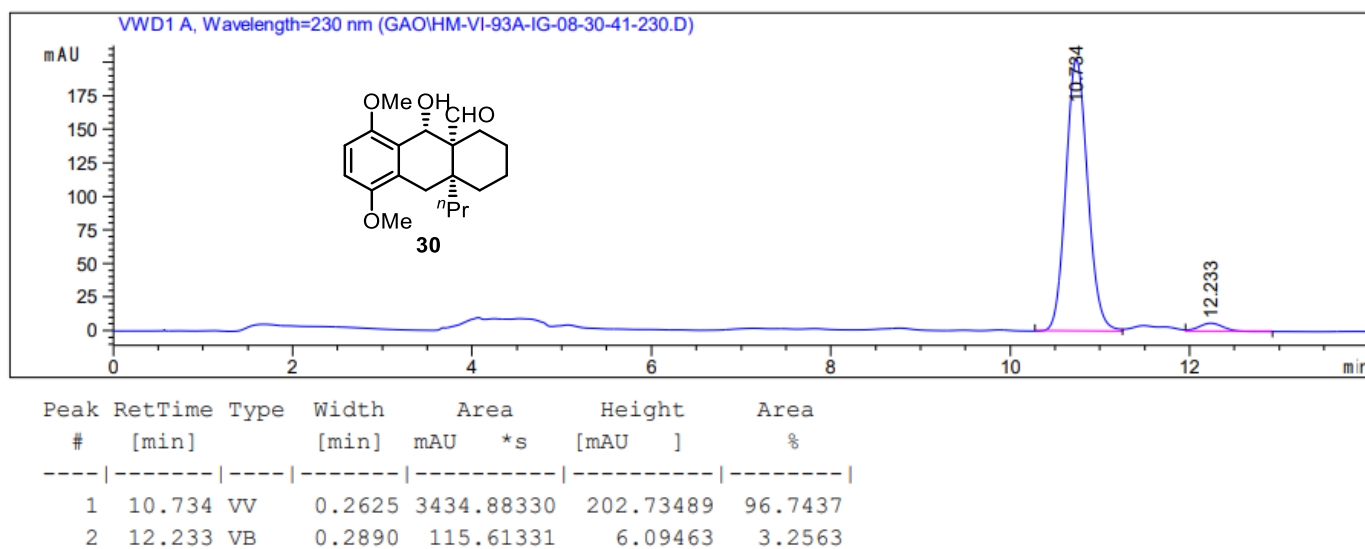

Enantiomeric excess: 93%, determined by HPLC (Daicel Chiralpak IG, hexane/isopropanol = 70/30, flow rate 0.8 mL/min, T = 25 °C, 230 nm):  $t_R = 10.734$ min (major),  $t_R = 12.232$  min (minor).

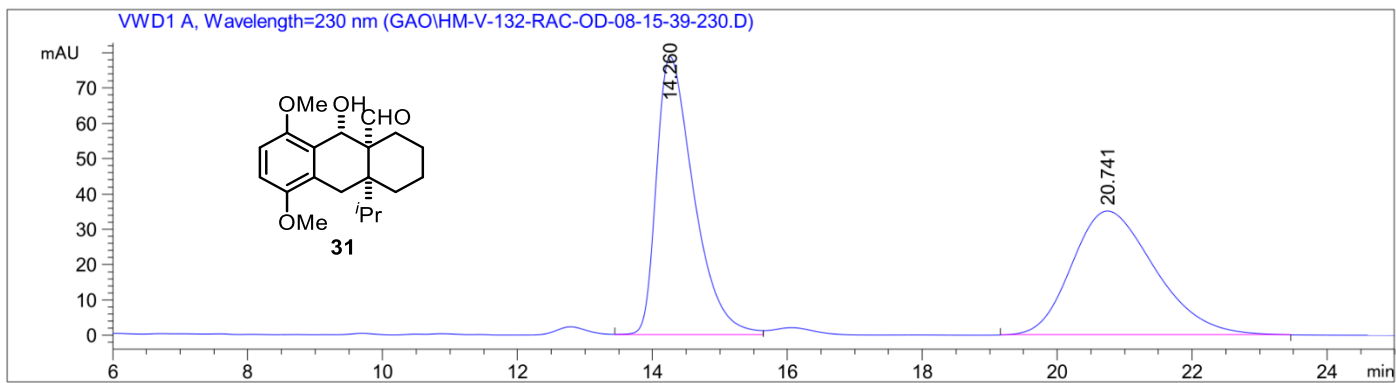

| Peak # | RetTime [min] | Type | Width [min] | Area mAU   | Area *s | Height [mAU] | Area %  |
|--------|---------------|------|-------------|------------|---------|--------------|---------|
| 1      | 14.260        | VV   | 0.5859      | 3031.88867 |         | 78.77032     | 50.1295 |
| 2      | 20.741        | BB   | 1.3427      | 3016.22046 |         | 35.11826     | 49.8705 |

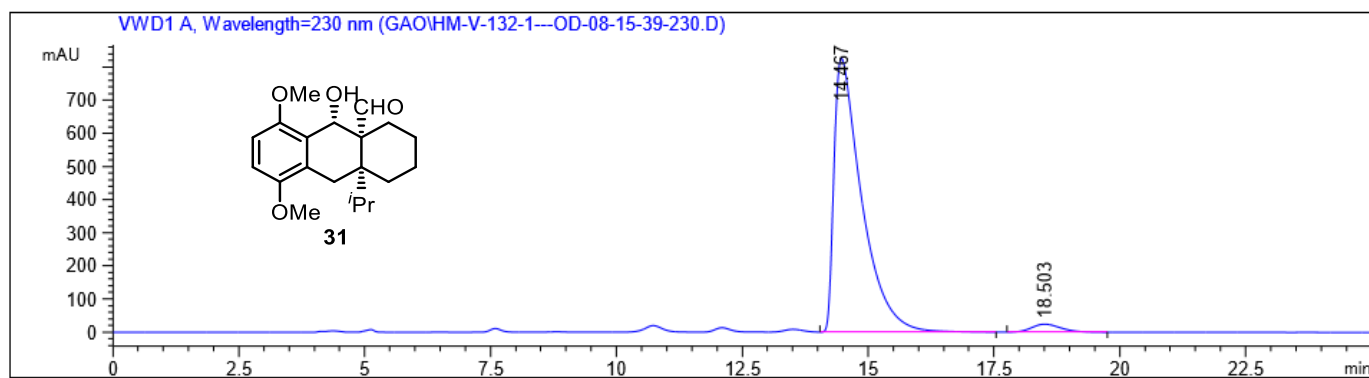

| Peak # | RetTime [min] | Type | Width [min] | Area mAU  | Area *s | Height [mAU] | Area %  |
|--------|---------------|------|-------------|-----------|---------|--------------|---------|
| 1      | 14.467        | VB   | 0.5640      | 3.16466e4 |         | 826.32013    | 96.9771 |
| 2      | 18.503        | BB   | 0.6027      | 986.47345 |         | 24.21560     | 3.0229  |

Enantiomeric excess: 94%, determined by HPLC (Daicel Chiralpak OD-H, hexane/isopropanol = 85/15, flow rate 0.8 mL/min, T = 25 °C, 230 nm):  $t_R = 14.467$ min (major),  $t_R = 18.503$  min (minor).



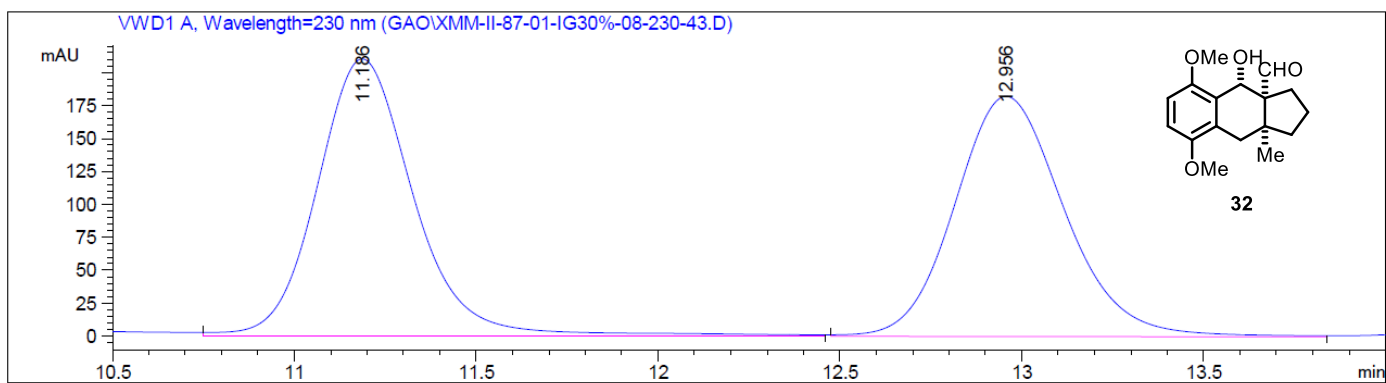

| Peak # | RetTime [min] | Type | Width [min] | Area mAU *s | Height [mAU] | Area %  |
|--------|---------------|------|-------------|-------------|--------------|---------|
| 1      | 11.186        | VB   | 0.2869      | 3960.56055  | 210.81316    | 50.7043 |
| 2      | 12.956        | BV   | 0.3248      | 3850.53784  | 182.48087    | 49.2957 |

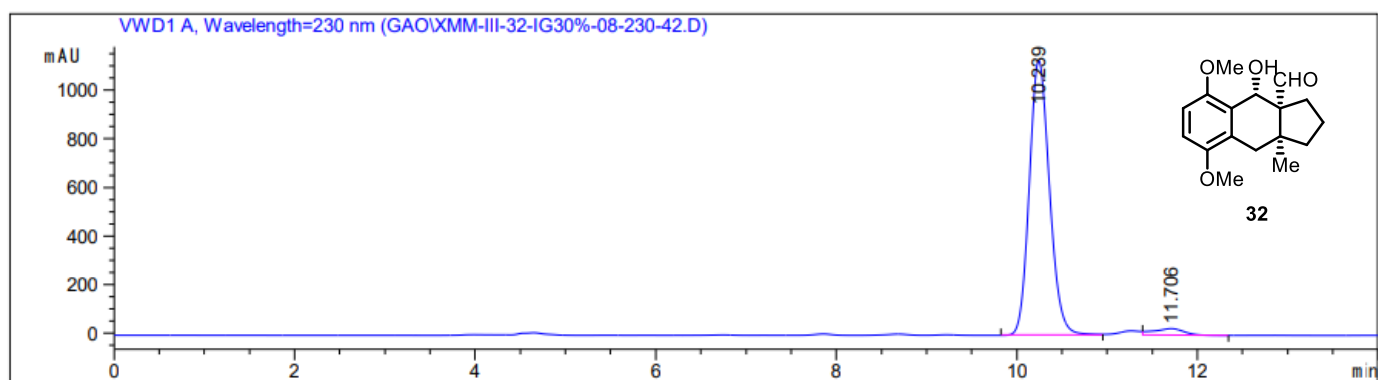

| Peak # | RetTime [min] | Type | Width [min] | Area mAU *s | Height [mAU] | Area %  |
|--------|---------------|------|-------------|-------------|--------------|---------|
| 1      | 10.239        | BV   | 0.2415      | 1.76156e4   | 1130.55688   | 96.3076 |
| 2      | 11.706        | VB   | 0.3451      | 675.38568   | 27.96367     | 3.6924  |

Enantiomeric excess: 93%, determined by HPLC (Daicel Chiralpak IG, hexane/isopropanol = 70/30, flow rate 0.8 mL/min, T = 25 °C, 230 nm):  $t_R = 10.239$  min (major),  $t_R = 11.706$  min (minor).

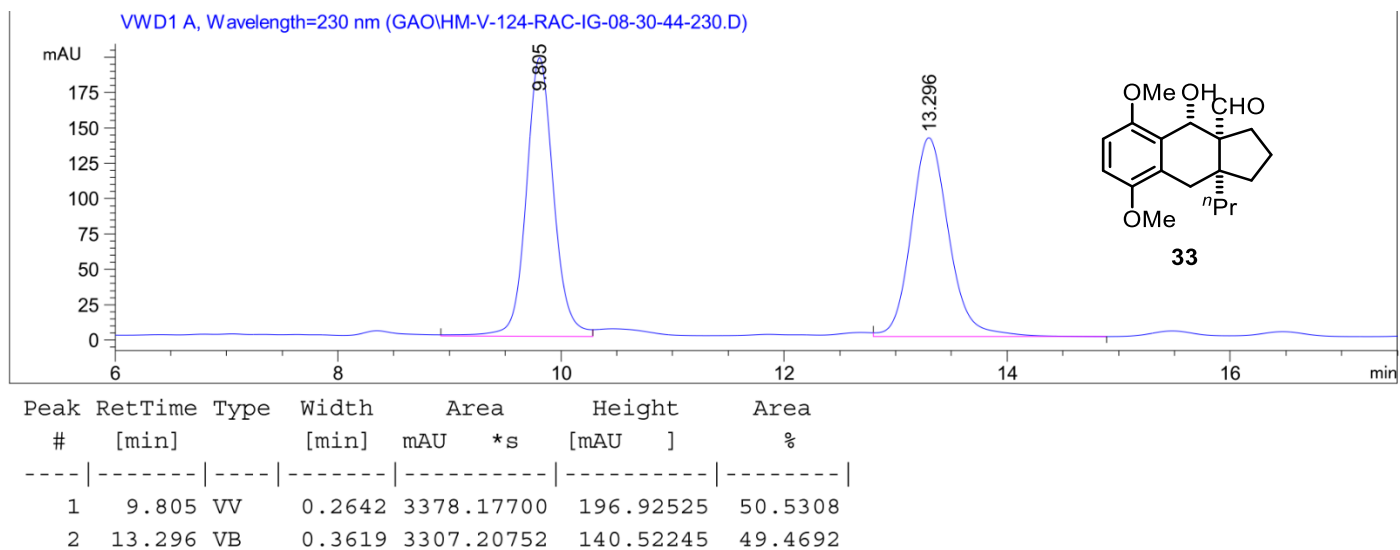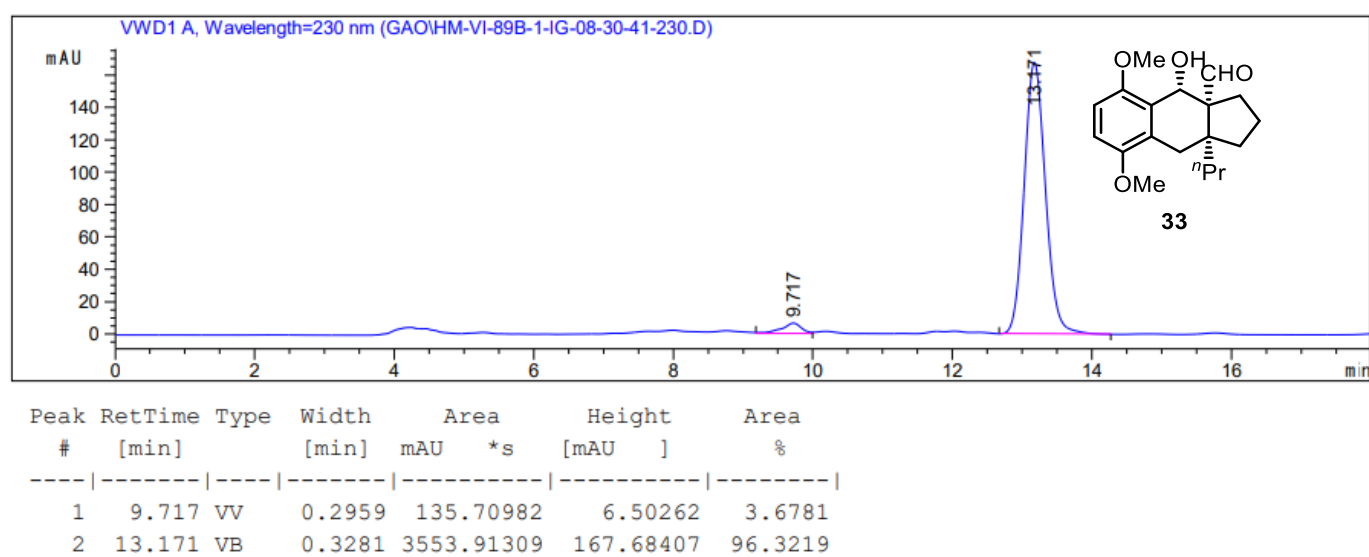

Enantiomeric excess: 91%, determined by HPLC (Daicel Chiralpak IG, hexane/isopropanol = 70/30, flow rate 0.8 mL/min, T = 25 °C, 230 nm):  $t_R = 9.717$ min (minor),  $t_R = 13.171$  min (major).

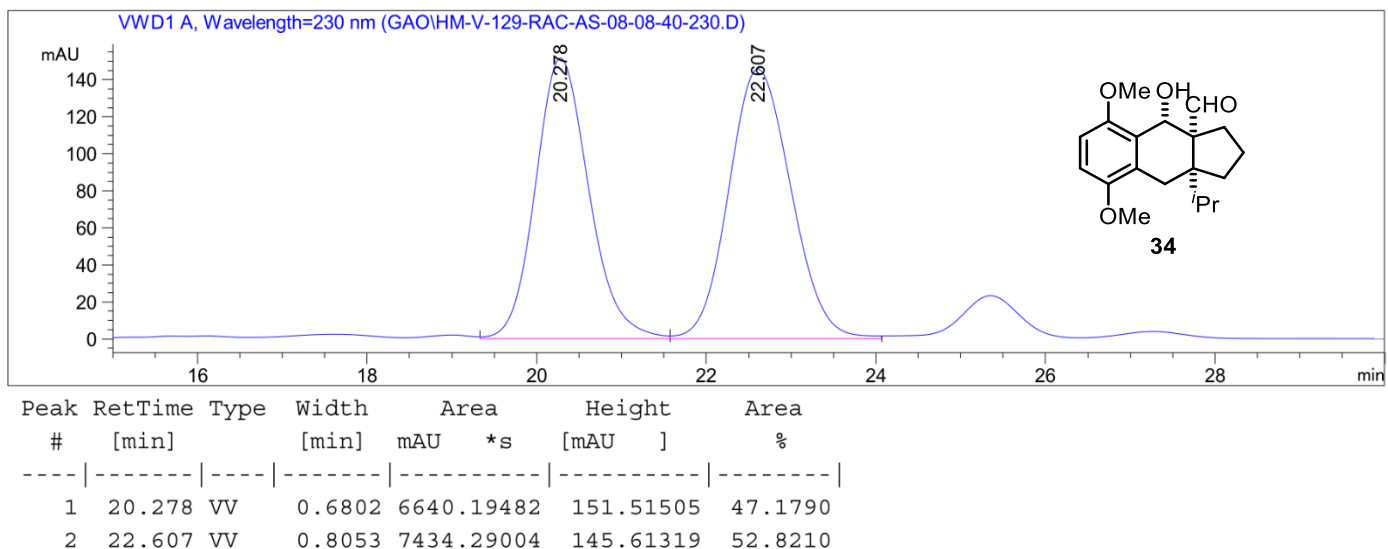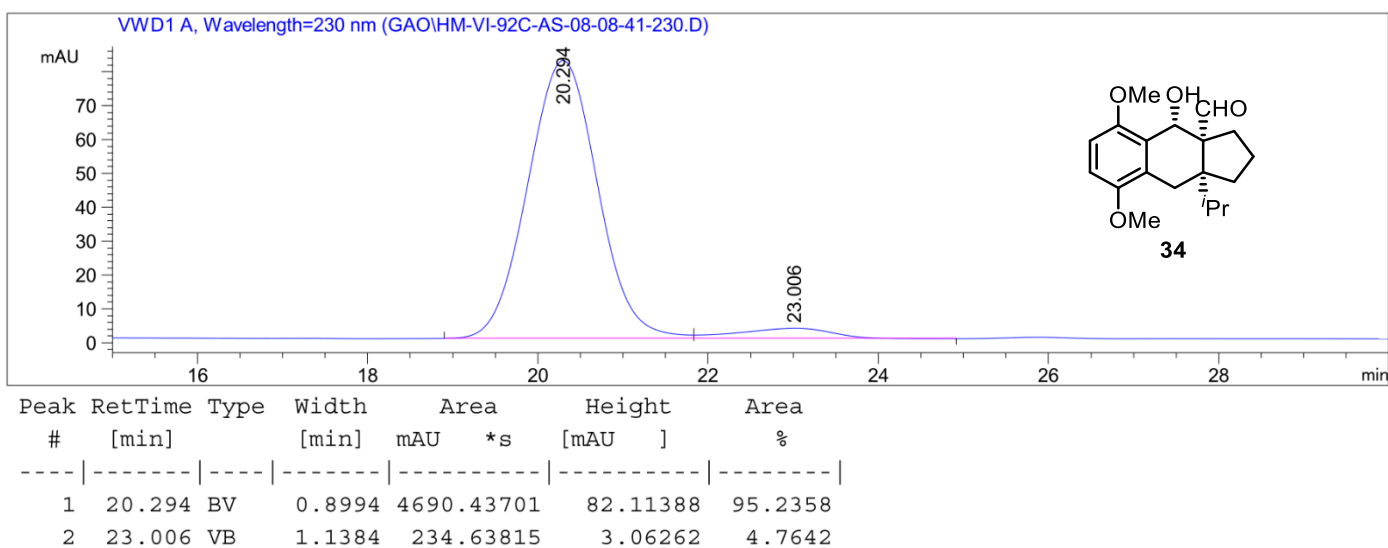

Enantiomeric excess: 91%, determined by HPLC (Daicel Chiralpak IG, hexane/isopropanol = 92/ 8, flow rate 0.8 mL/min, T = 25 °C, 230 nm):  $t_R = 20.294$  min (major),  $t_R = 23.006$  min (minor).

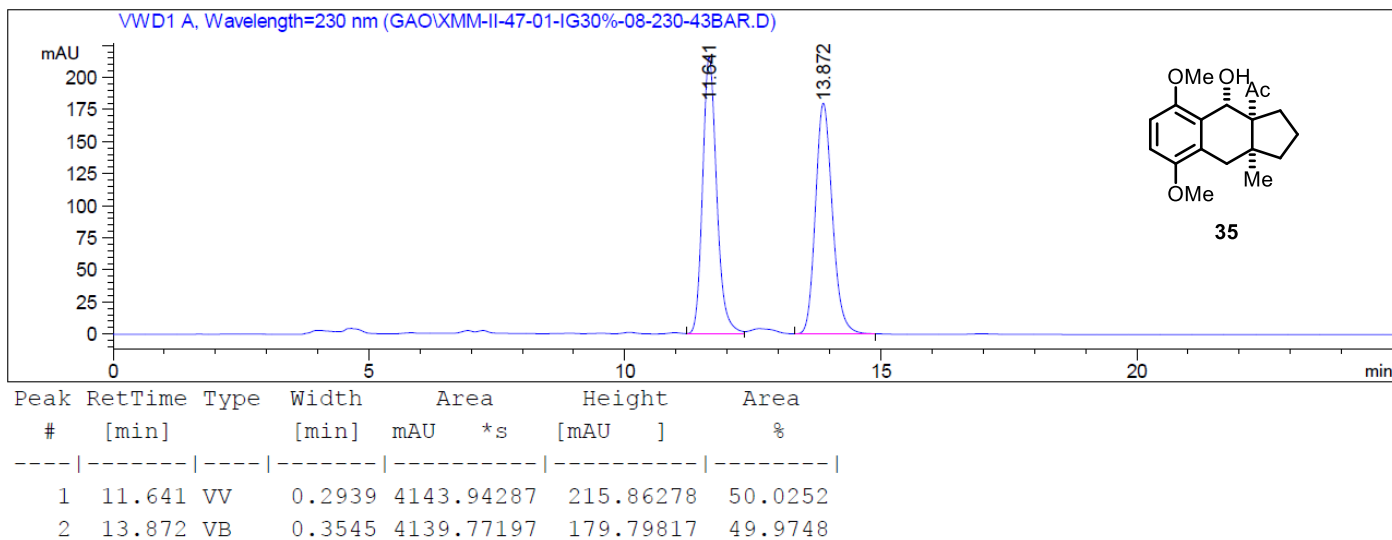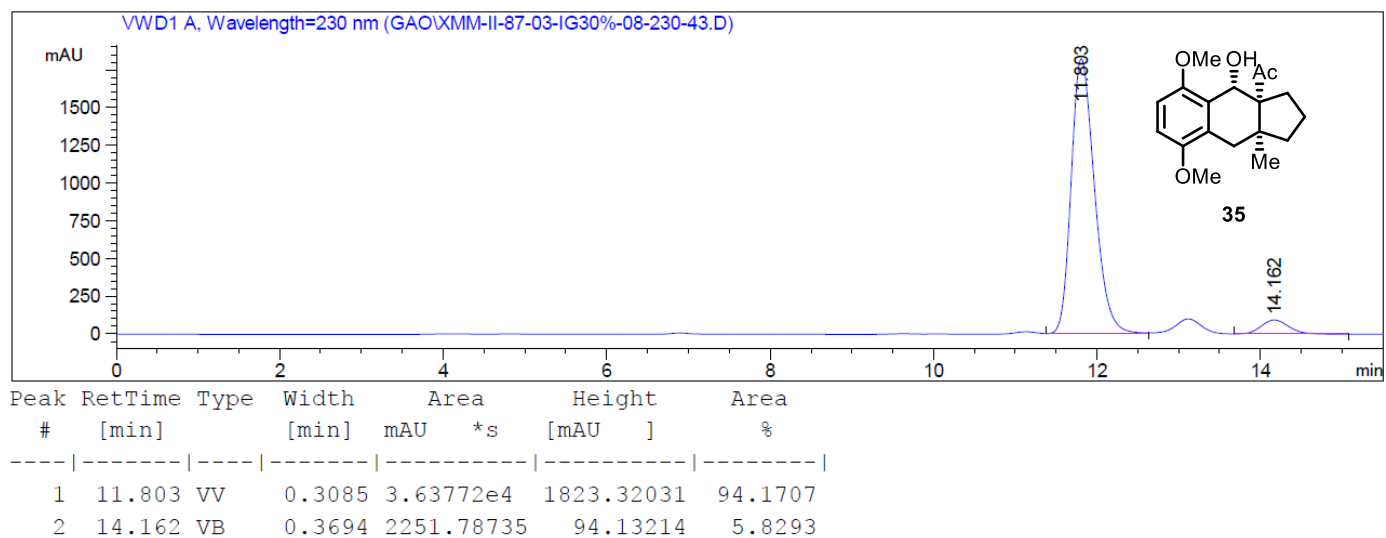

Enantiomeric excess: 88%, determined by HPLC (Daicel Chiralpak IG, hexane/isopropanol = 70/30, flow rate 0.8 mL/min, T = 25 °C, 230 nm):  $t_R$  = 11.803 min (major),  $t_R$  = 14.162 min (minor).

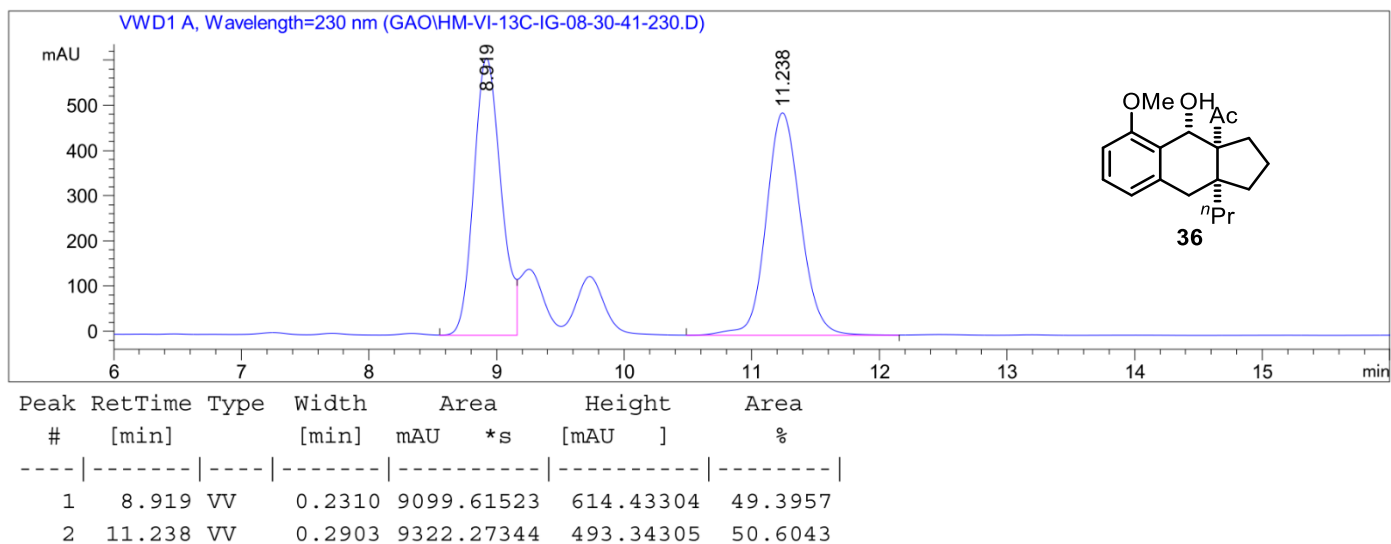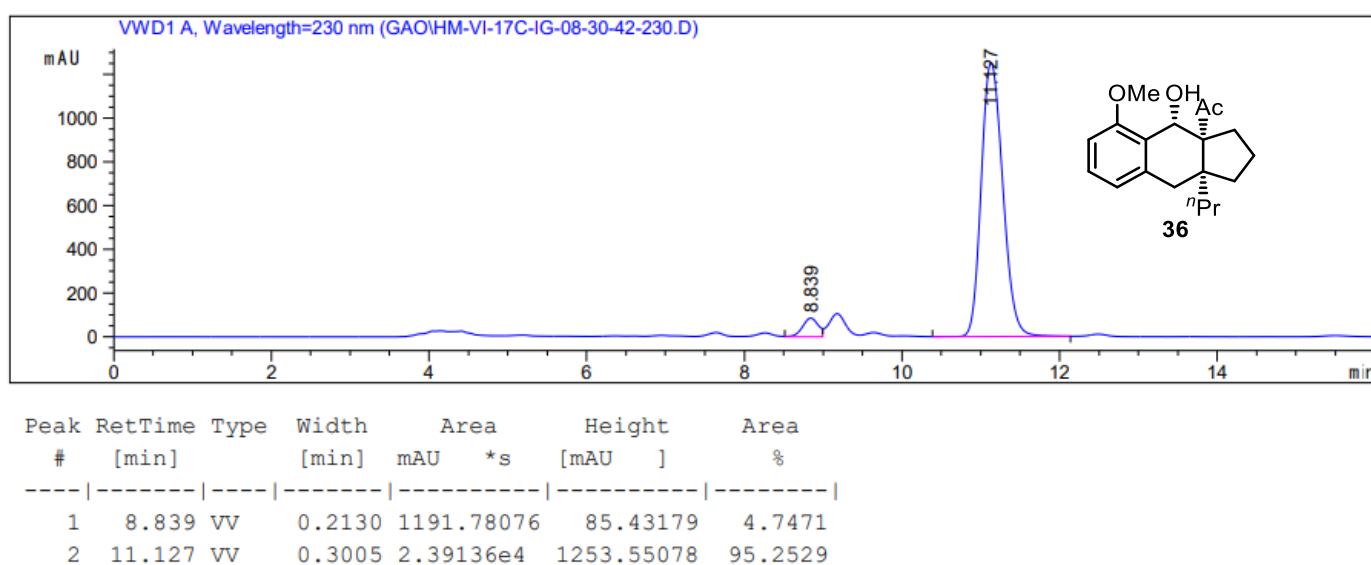

Enantiomeric excess: 91%, determined by HPLC (Daicel Chiralpak IG, hexane/isopropanol = 70/30, flow rate 0.8 mL/min, T = 25 °C, 230 nm):  $t_R = 8.839$ min (minor),  $t_R = 11.127$  min (major).

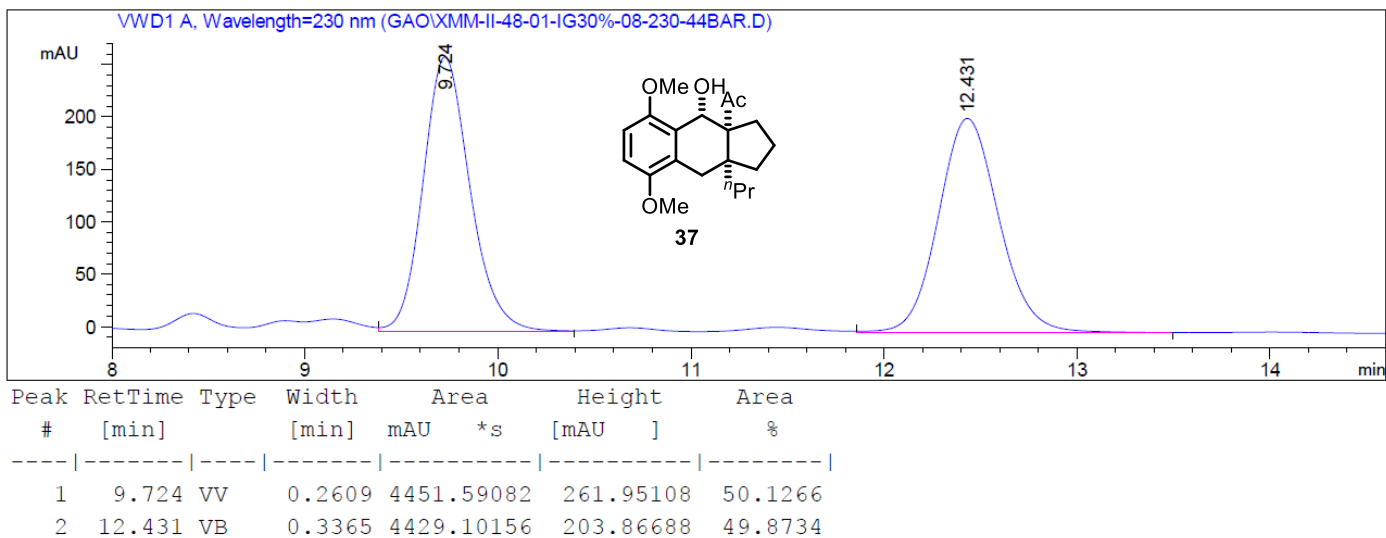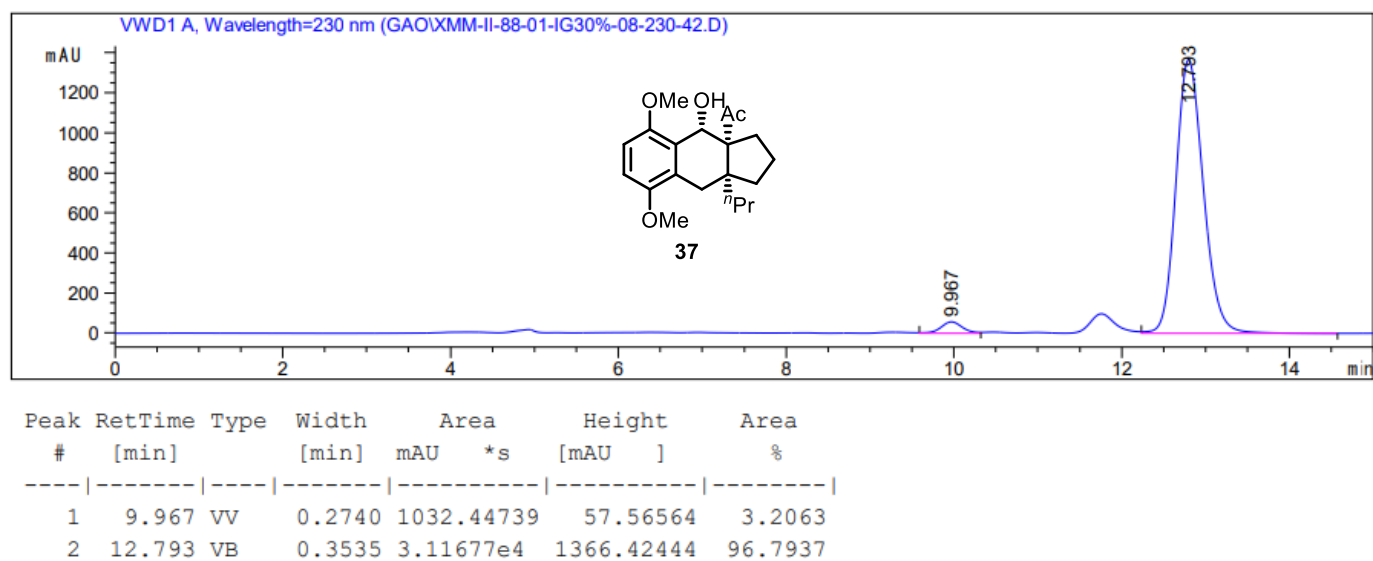

Enantiomeric excess: 94%, determined by HPLC (Daicel Chiralpak IG, hexane/isopropanol = 70/30, flow rate 0.8 mL/min, T = 25 °C, 230 nm):  $t_R = 9.967$  min (minor),  $t_R = 12.793$  min (major).

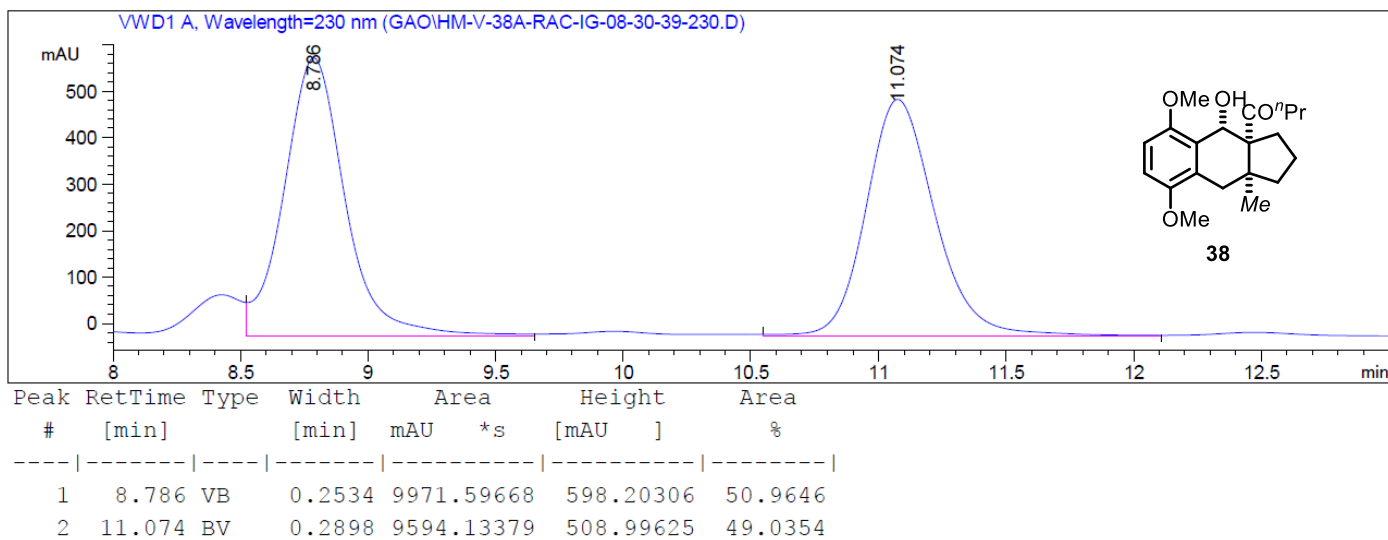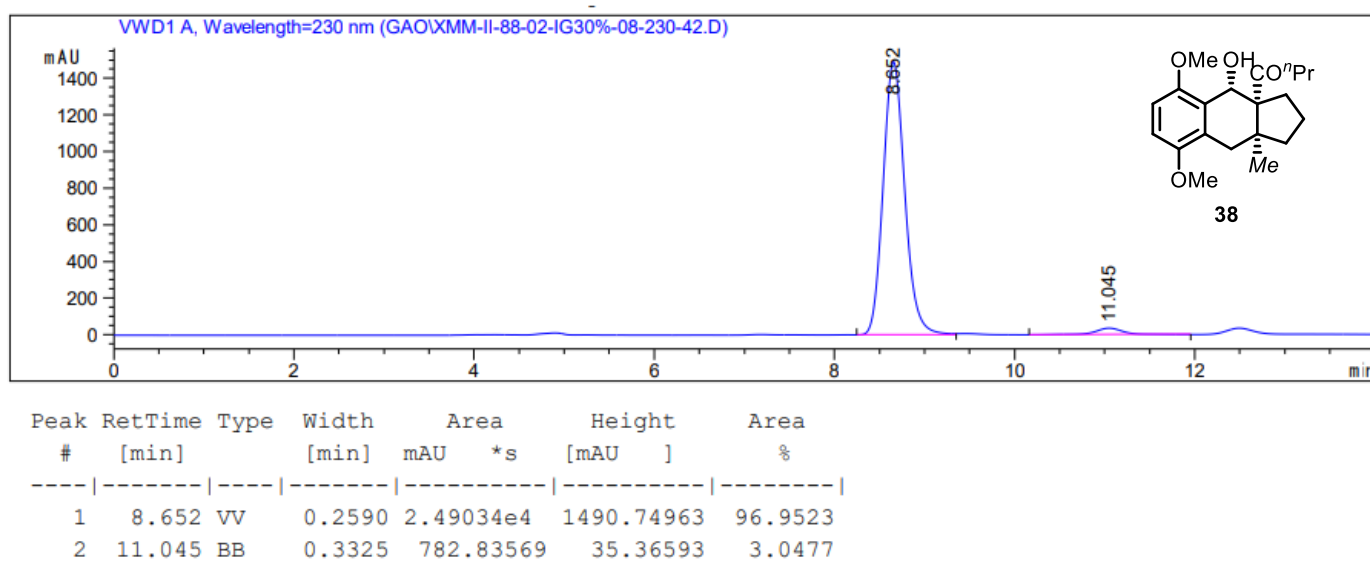

Enantiomeric excess: 94%, determined by HPLC (Daicel Chiralpak IG, hexane/isopropanol = 70/30, flow rate 0.8 mL/min, T = 25 °C, 230 nm):  $t_R = 8.652$  min (minor),  $t_R = 11.045$  min (major).

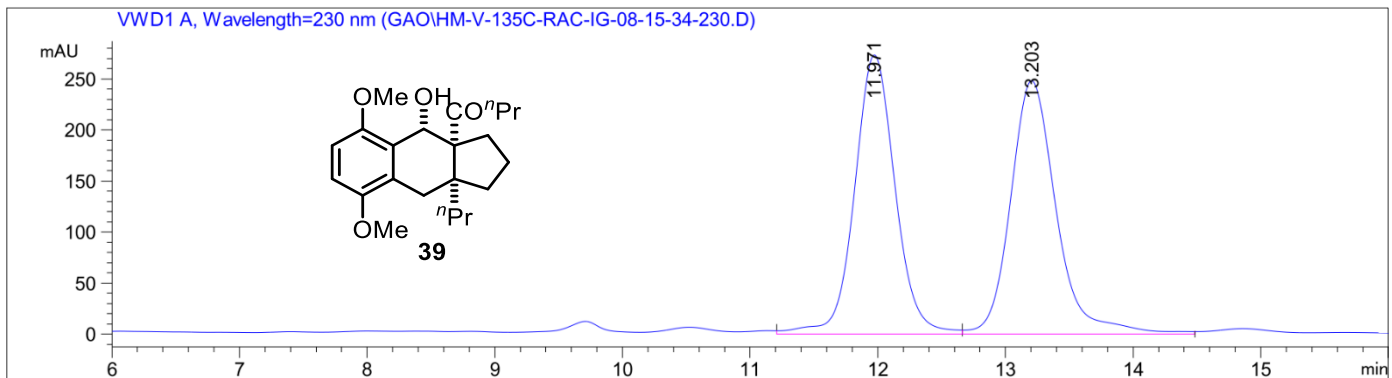

| Peak # | RetTime [min] | Type | Width [min] | Area mAU   | Area *s | Height [mAU] | Area %  |
|--------|---------------|------|-------------|------------|---------|--------------|---------|
| 1      | 11.971        | VV   | 0.3404      | 6066.05420 |         | 273.39597    | 49.5135 |
| 2      | 13.203        | VV   | 0.3809      | 6185.24902 |         | 248.29532    | 50.4865 |

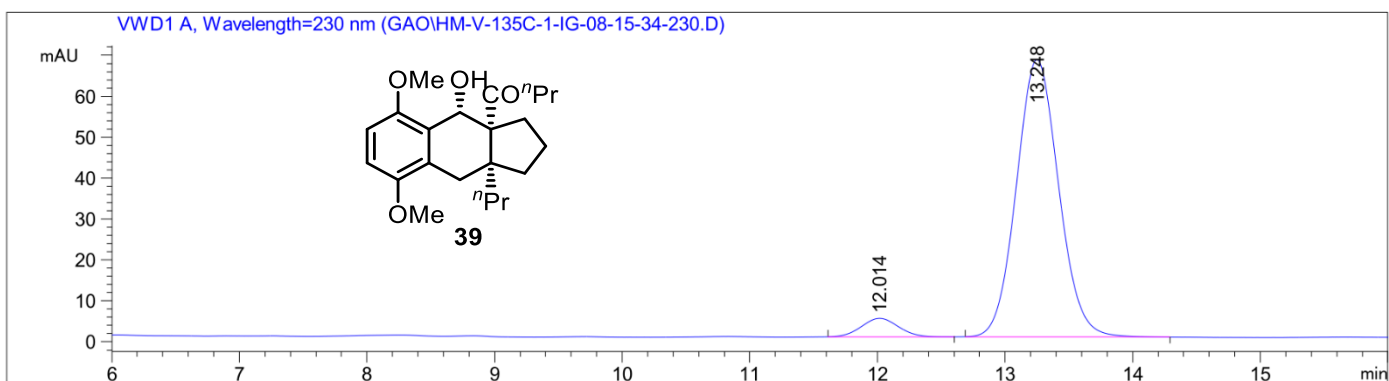

| Peak # | RetTime [min] | Type | Width [min] | Area mAU   | Area *s | Height [mAU] | Area %  |
|--------|---------------|------|-------------|------------|---------|--------------|---------|
| 1      | 12.014        | BB   | 0.3243      | 97.25022   |         | 4.61764      | 5.8376  |
| 2      | 13.248        | BB   | 0.3600      | 1568.68762 |         | 67.84757     | 94.1624 |

Enantiomeric excess: 88%, determined by HPLC (Daicel Chiralpak IG, hexane/isopropanol = 85/15, flow rate 0.8 mL/min, T = 25 °C, 230 nm):  $t_R = 12.014$ min (minor),  $t_R = 13.248$  min (major).



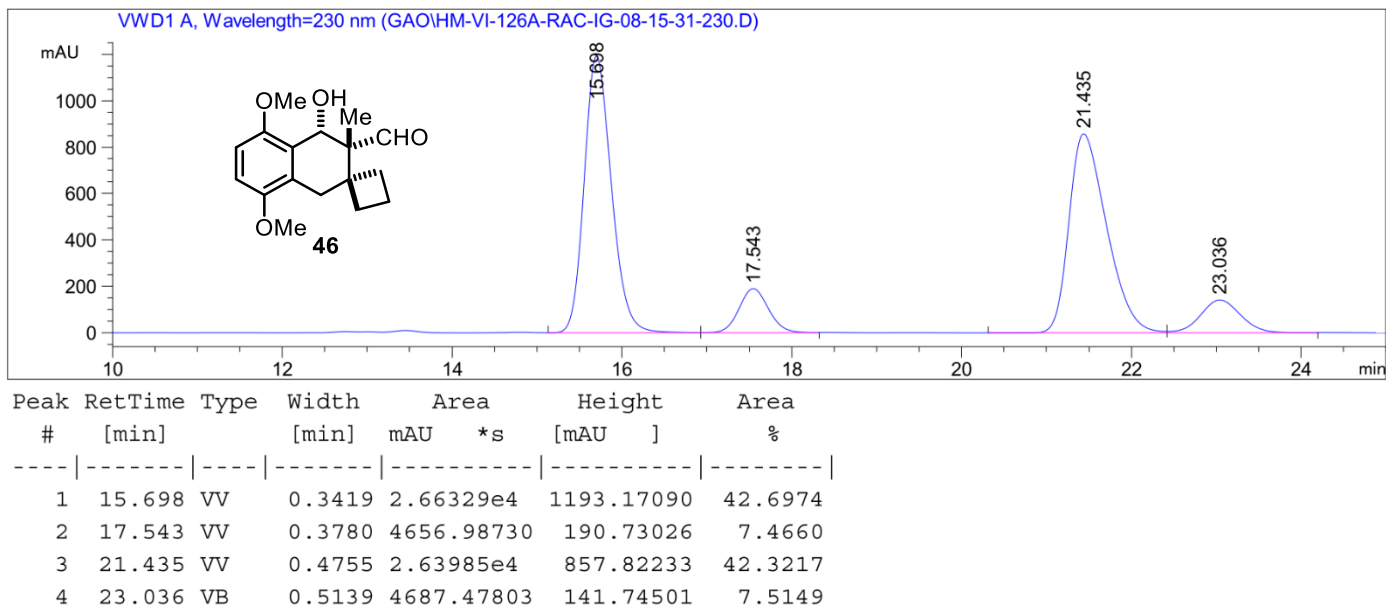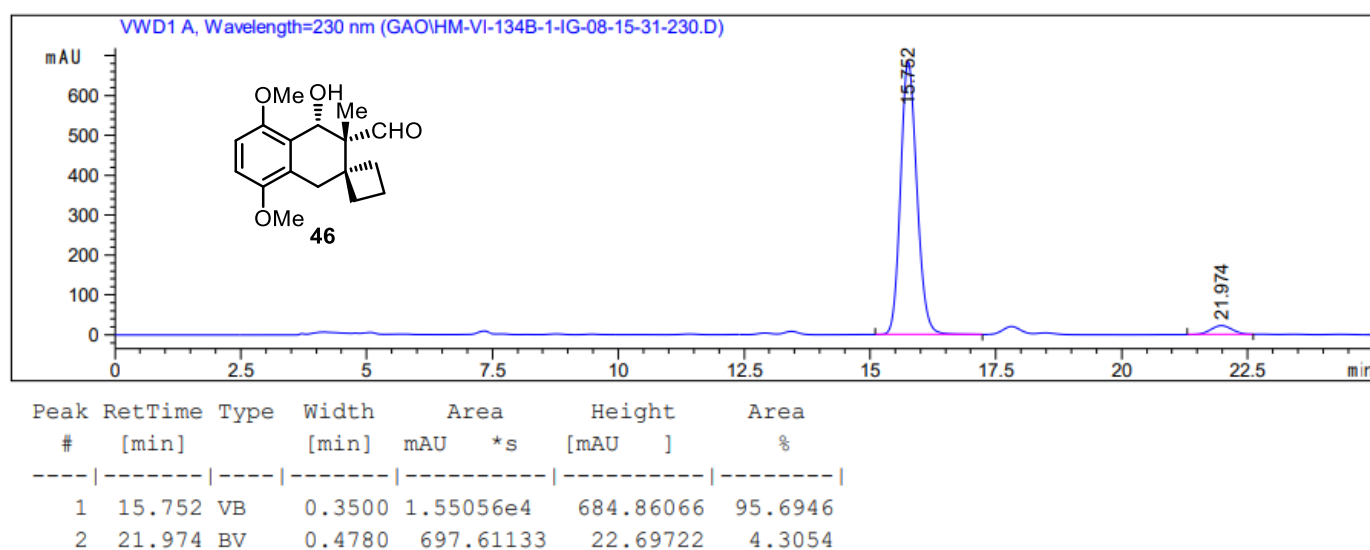

Enantiomeric excess: 91%, determined by HPLC (Daicel Chiralpak IG, hexane/isopropanol = 85/15, flow rate 0.8 mL/min, T = 25 °C, 230 nm):  $t_R = 15.752$ min (major),  $t_R = 21.974$  min (minor).

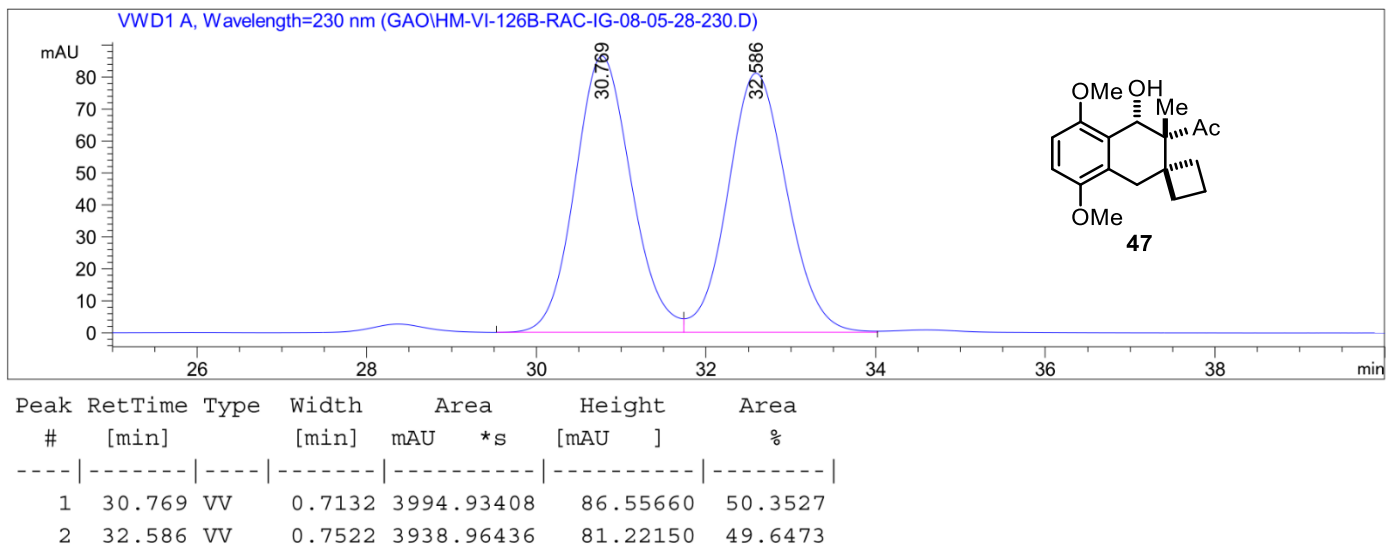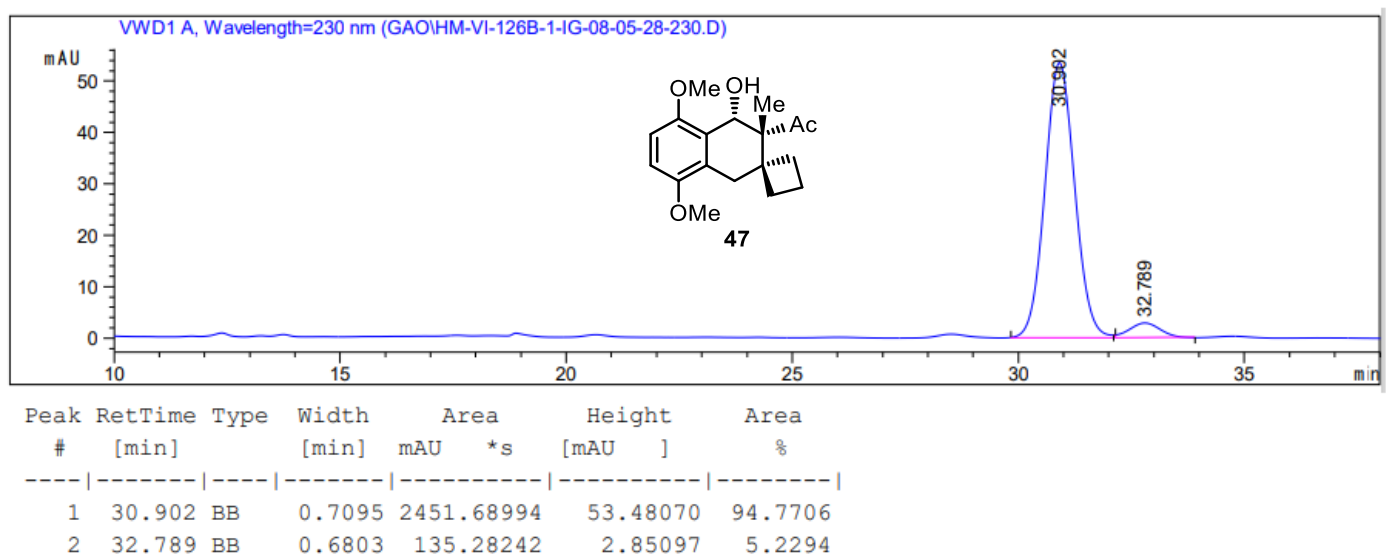

Enantiomeric excess: 89%, determined by HPLC (Daicel Chiralpak IG, hexane/isopropanol = 95/5, flow rate 0.8 mL/min, T = 25 °C, 230 nm):  $t_R = 30.903$ min (major),  $t_R = 32.791$  min (minor).

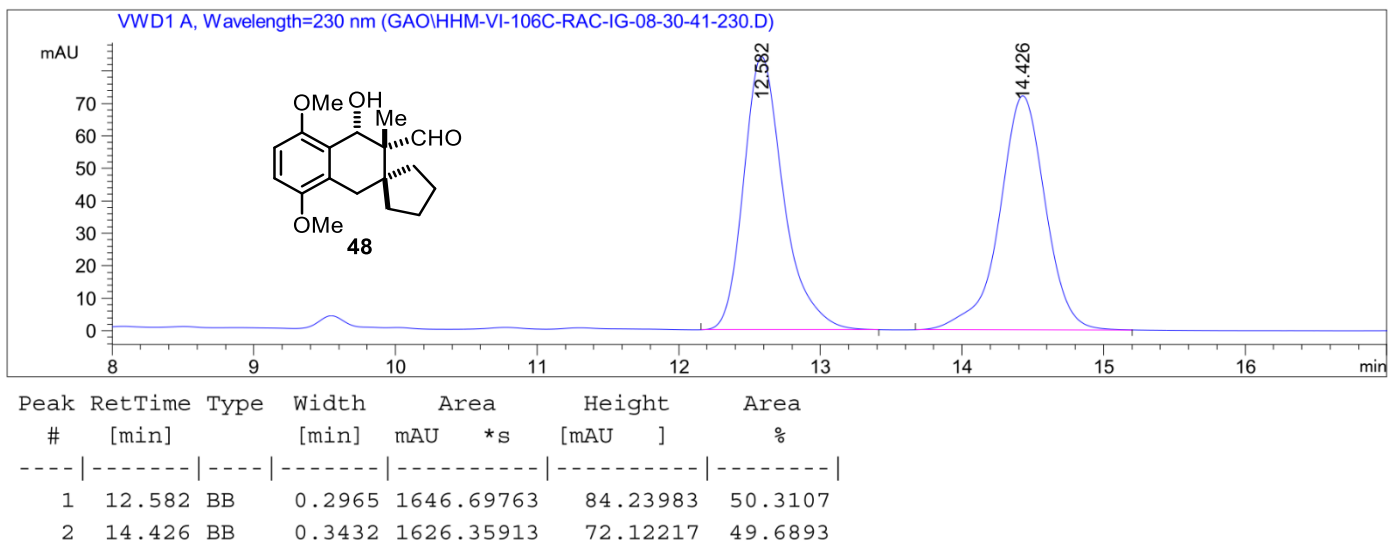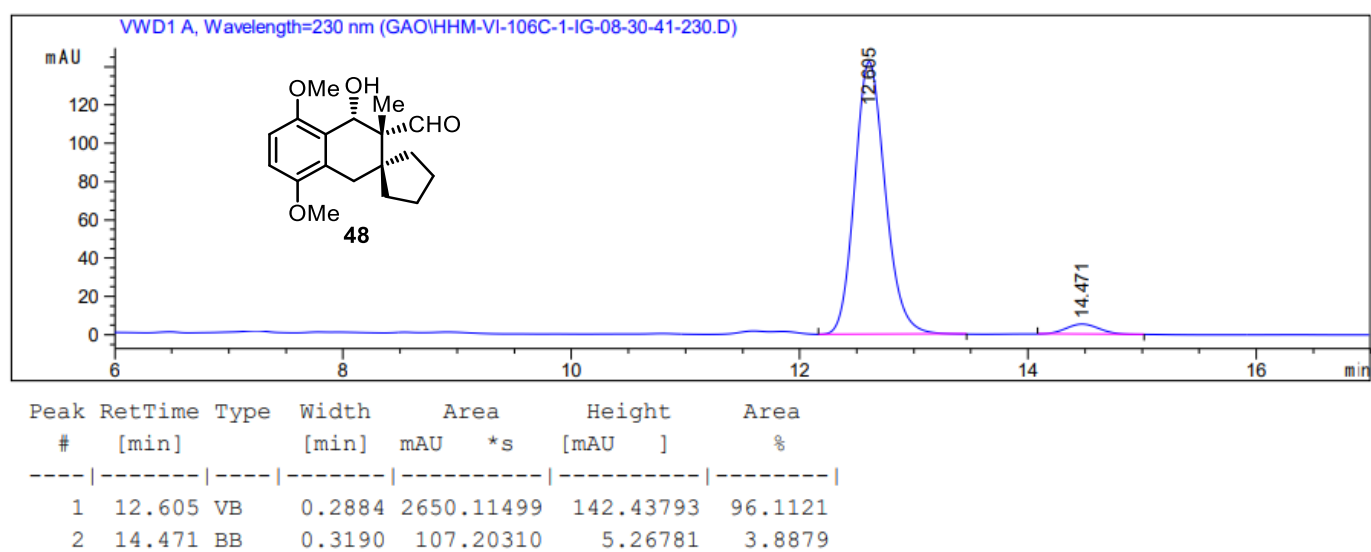

Enantiomeric excess: 92%, determined by HPLC (Daicel Chiralpak IG, hexane/isopropanol = 70/30, flow rate 0.8 mL/min, T = 25 °C, 230 nm):  $t_R = 12.605$ min (major),  $t_R = 14.471$  min (minor).

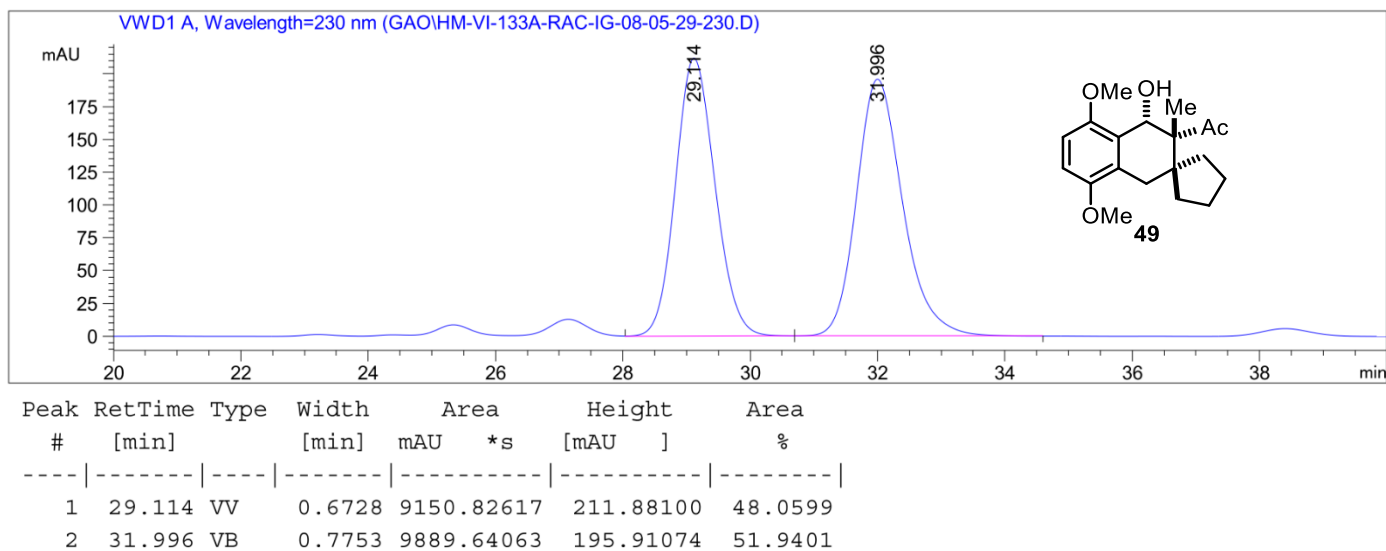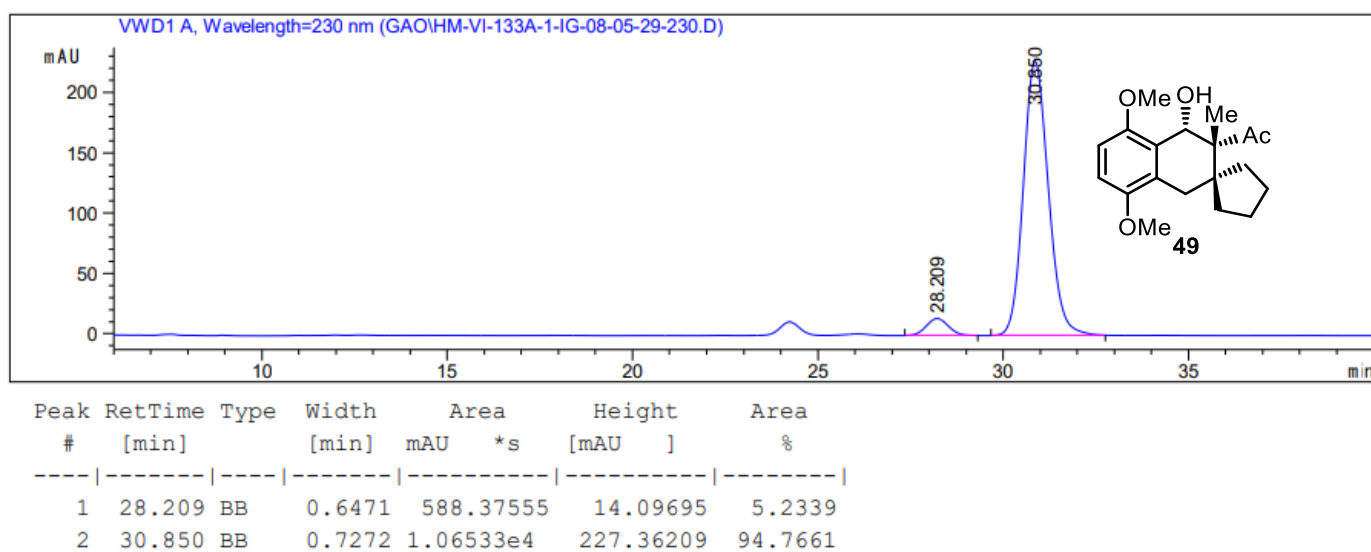

Enantiomeric excess: 90%, determined by HPLC (Daicel Chiralpak IG, hexane/isopropanol = 95/5, flow rate 0.8 mL/min, T = 25 °C, 230 nm):  $t_R$  = 28.209min (minor),  $t_R$  = 30.850 min (major).

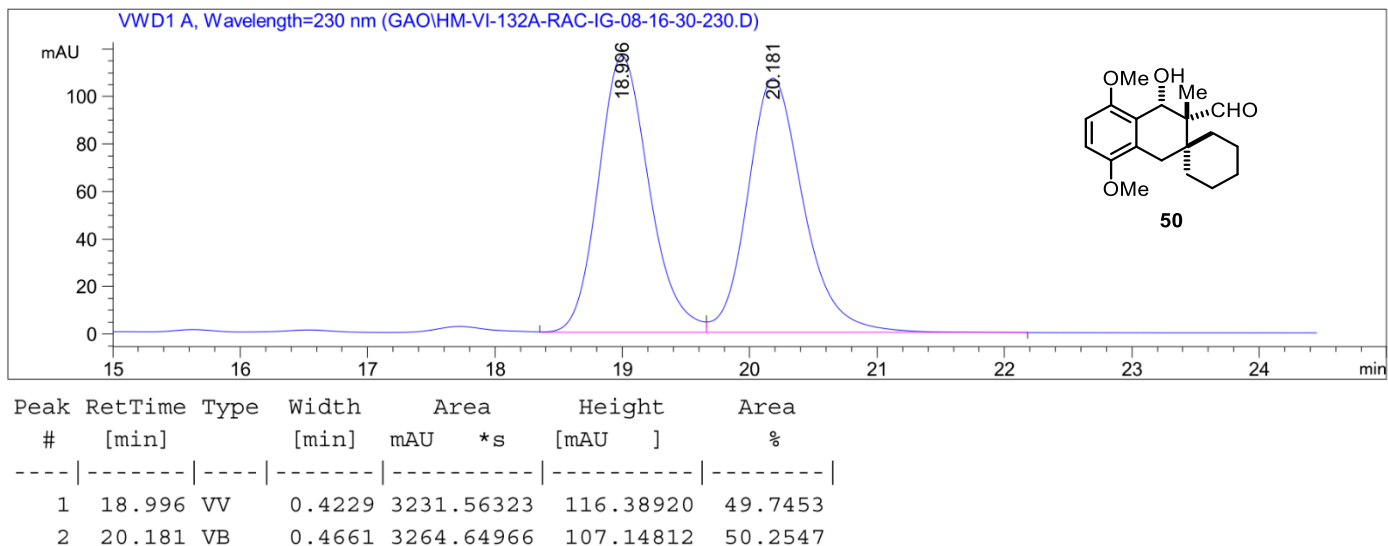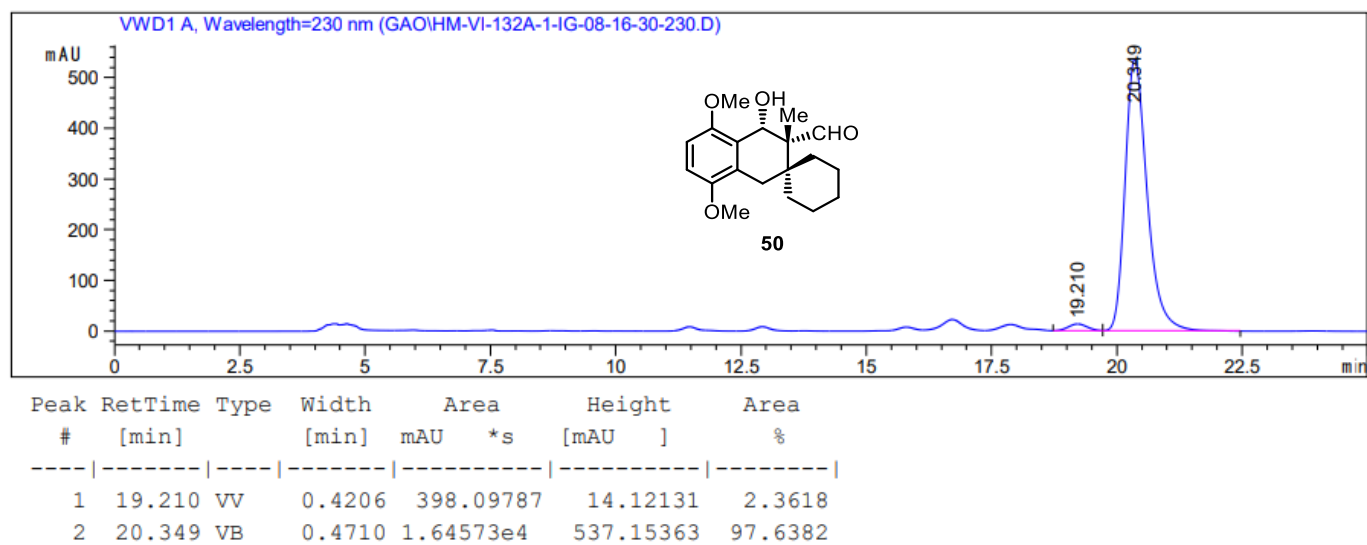

Enantiomeric excess: 95%, determined by HPLC (Daicel Chiralpak IG, hexane/isopropanol = 84/ 16, flow rate 0.8 mL/min, T = 25 °C, 230 nm):  $t_R = 19.210$ min (minor),  $t_R = 20.349$  min (major).

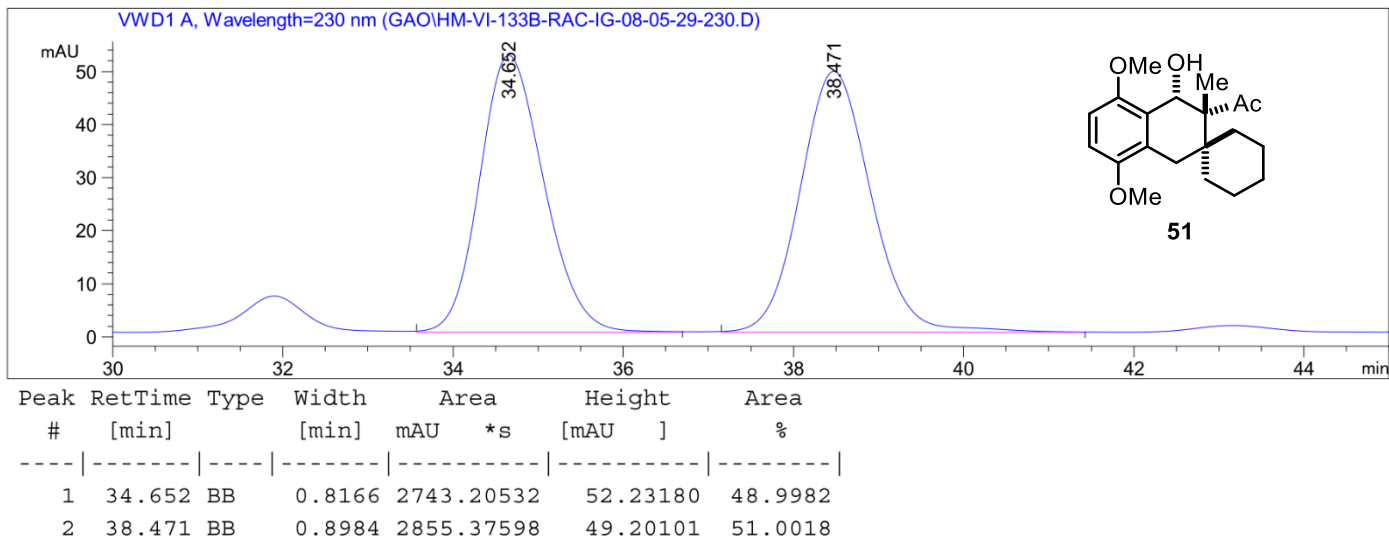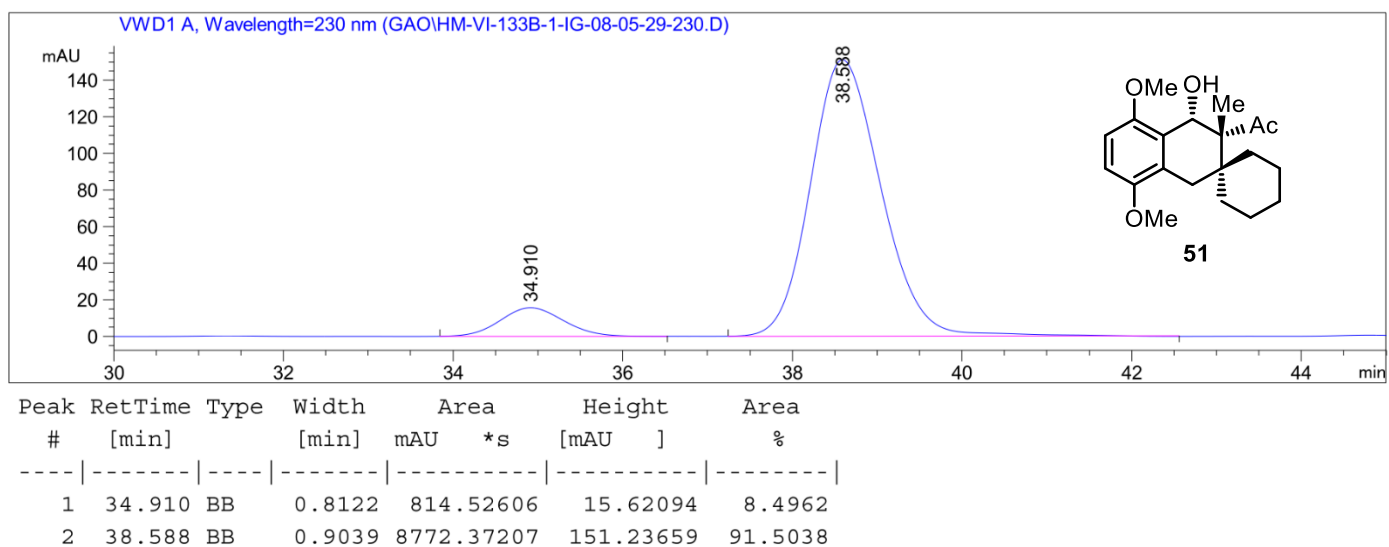

Enantiomeric excess: 83%, determined by HPLC (Daicel Chiralpak IG, hexane/isopropanol = 95/5, flow rate 0.8 mL/min, T = 25 °C, 230 nm):  $t_R$  = 34.910 min (minor),  $t_R$  = 38.588 min (major).

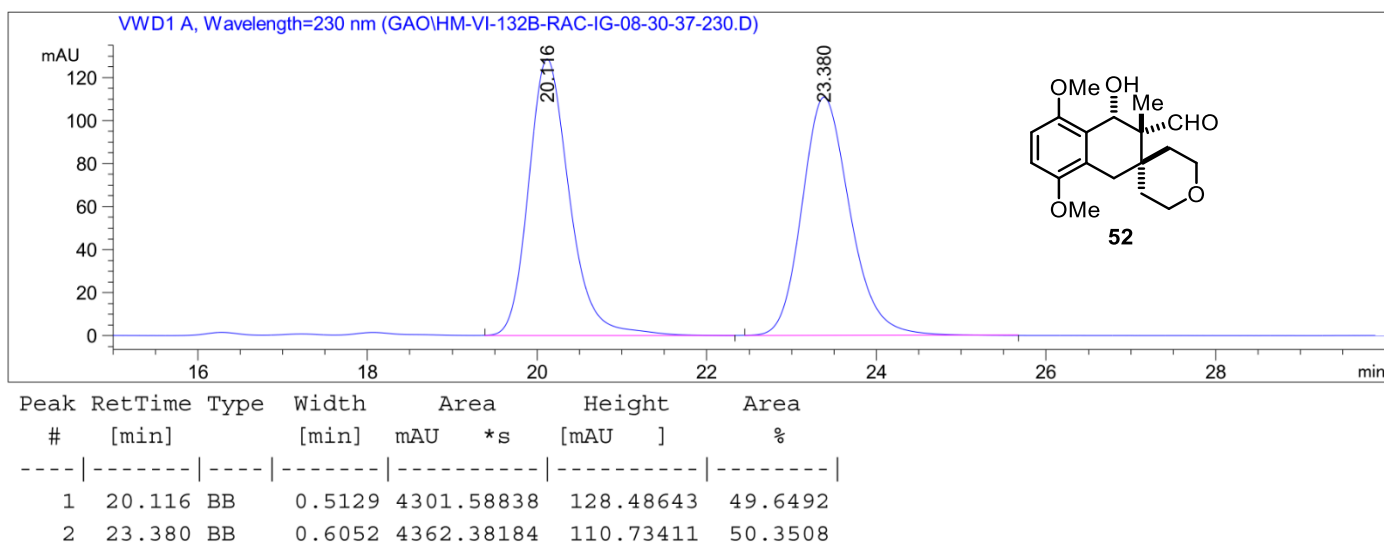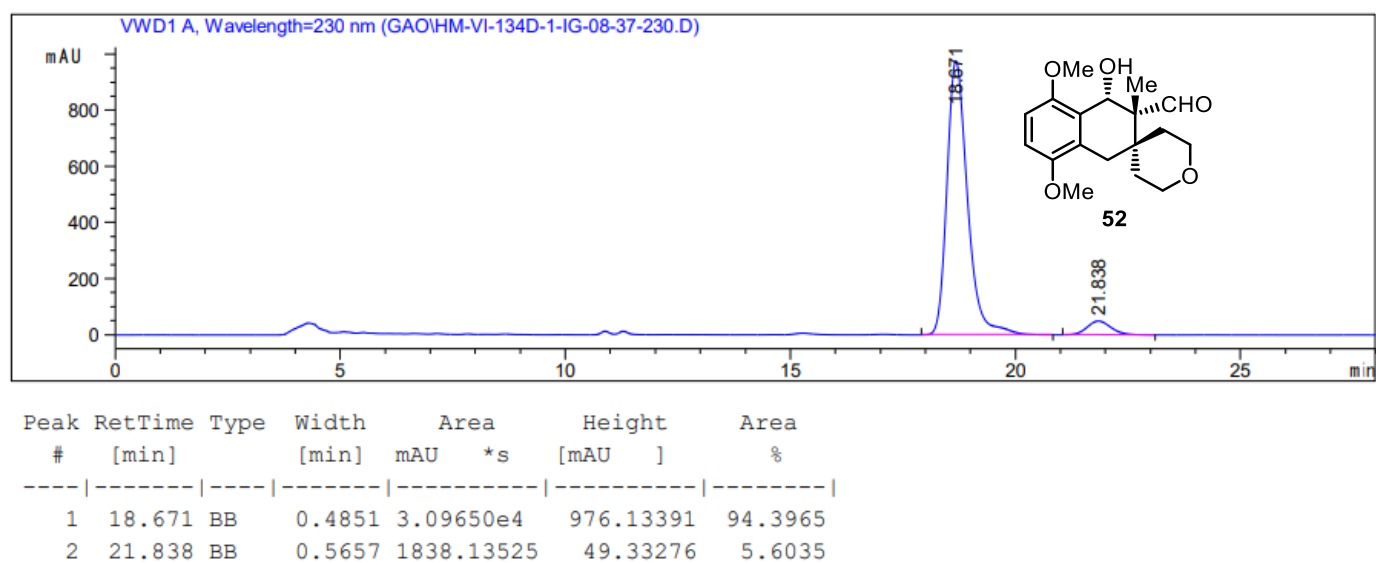

Enantiomeric excess: 88%, determined by HPLC (Daicel Chiralpak IG, hexane/isopropanol = 70/30, flow rate 0.8 mL/min, T = 25 °C, 230 nm):  $t_R = 18.671$ min (major),  $t_R = 21.838$  min (minor).

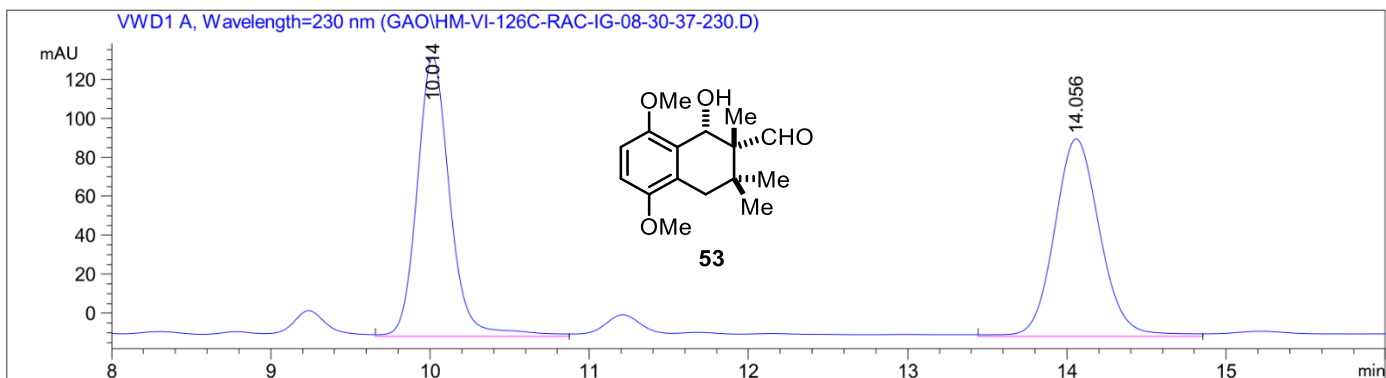

| Peak # | RetTime [min] | Type | Width [min] | Area mAU *s | Height [mAU] | Area %  |
|--------|---------------|------|-------------|-------------|--------------|---------|
| 1      | 10.014        | VV   | 0.2206      | 2063.43115  | 143.09569    | 50.3545 |
| 2      | 14.056        | VV   | 0.3099      | 2034.38037  | 101.36061    | 49.6455 |

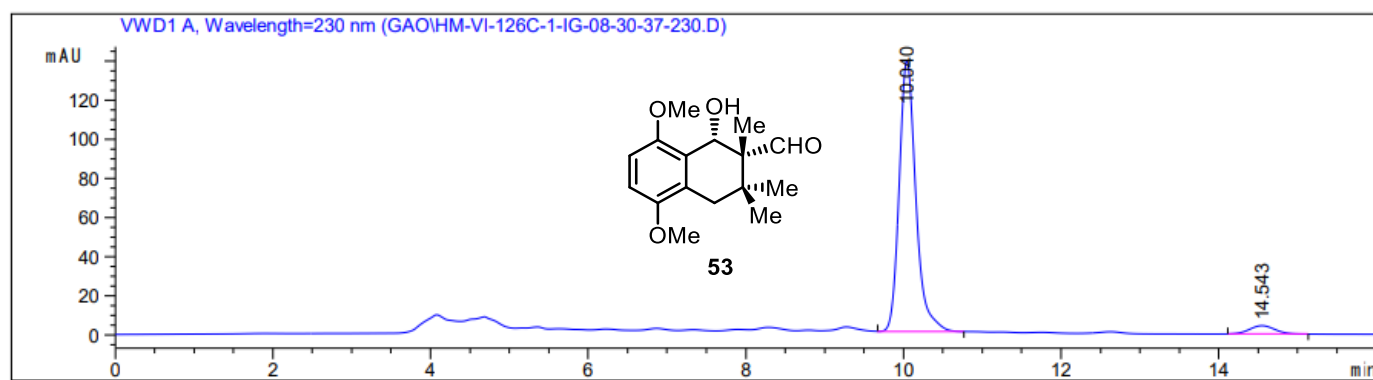

| Peak # | RetTime [min] | Type | Width [min] | Area mAU *s | Height [mAU] | Area %  |
|--------|---------------|------|-------------|-------------|--------------|---------|
| 1      | 10.040        | VB   | 0.2238      | 2039.23950  | 138.78944    | 95.4781 |
| 2      | 14.543        | BB   | 0.3511      | 96.57851    | 4.29516      | 4.5219  |

Enantiomeric excess: 91%, determined by HPLC (Daicel Chiralpak IG, hexane/isopropanol = 70/30, flow rate 0.8 mL/min, T = 25 °C, 230 nm):  $t_R = 10.040$  min (major),  $t_R = 14.544$  min (minor).



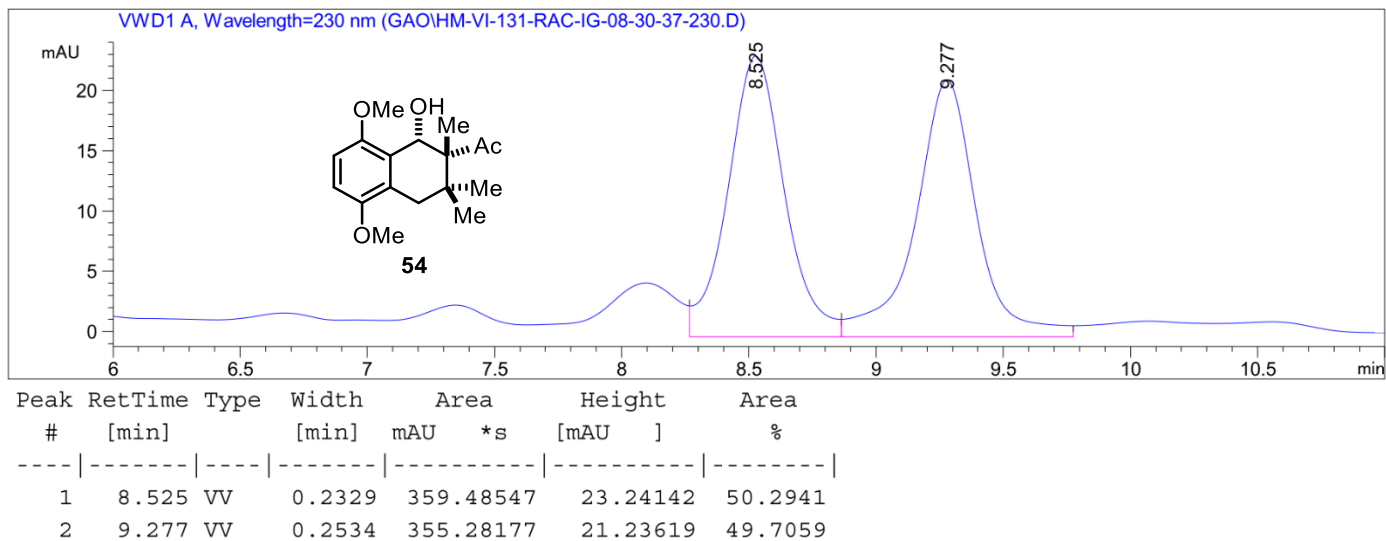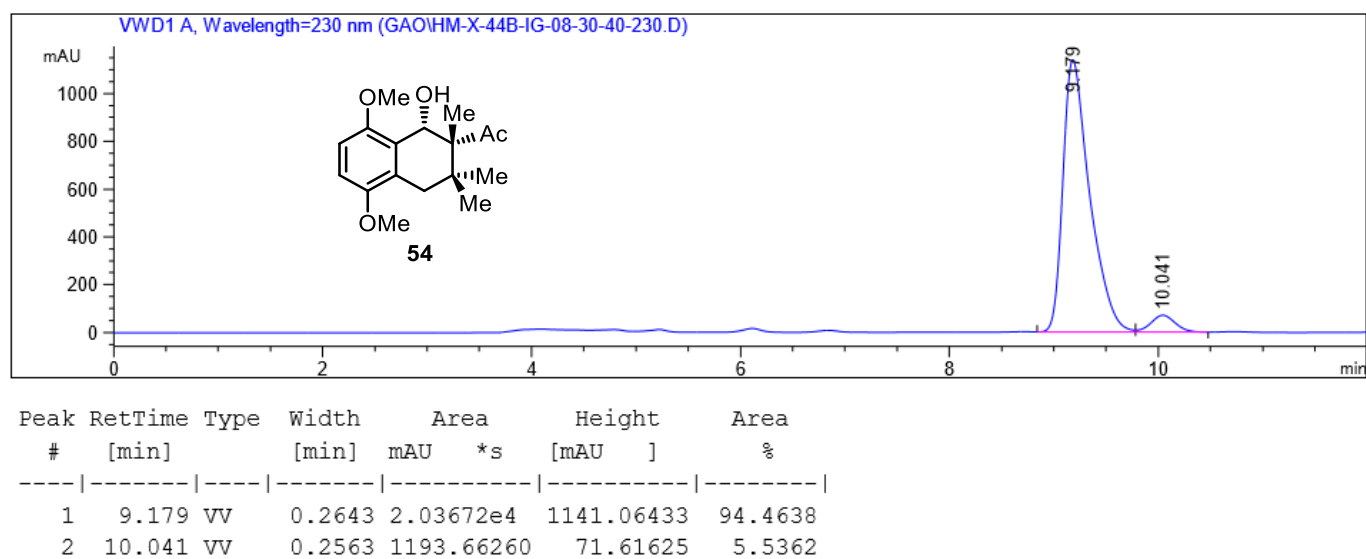

Enantiomeric excess: 89%, determined by HPLC (Daicel Chiralpak IG, hexane/isopropanol = 70/30, flow rate 0.8 mL/min, T = 25 °C, 230 nm):  $t_R = 9.179$  min (major),  $t_R = 10.041$  min (minor).

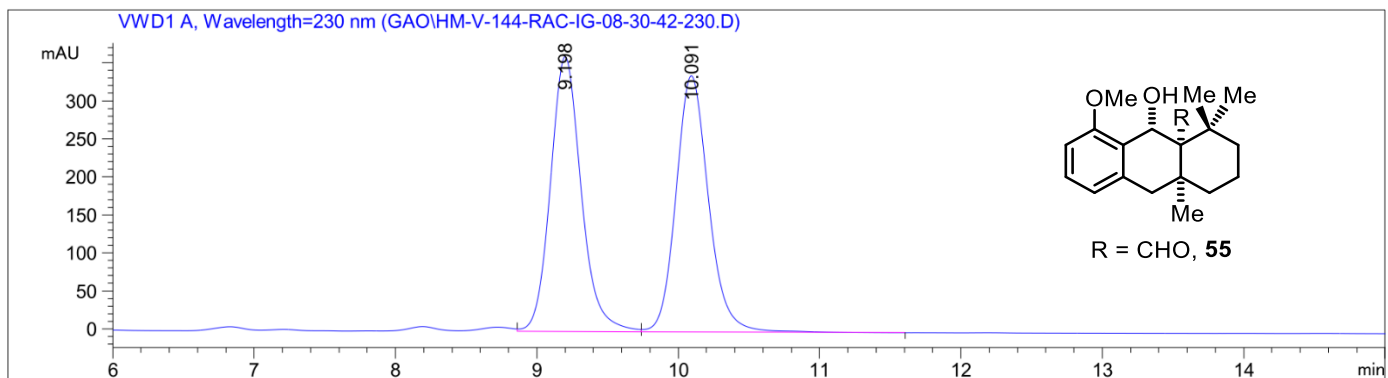

| Peak # | RetTime [min] | Type | Width [min] | Area mAU *s | Height [mAU] | Area %  |
|--------|---------------|------|-------------|-------------|--------------|---------|
| 1      | 9.198         | VV   | 0.2327      | 5497.01807  | 361.66394    | 50.3769 |
| 2      | 10.091        | VB   | 0.2486      | 5414.76221  | 337.08356    | 49.6231 |

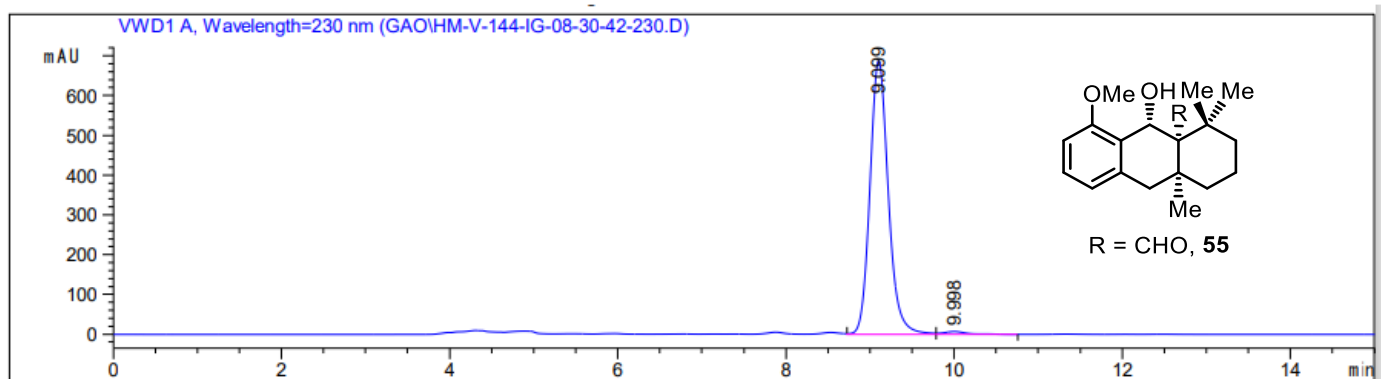

| Peak # | RetTime [min] | Type | Width [min] | Area mAU *s | Height [mAU] | Area %  |
|--------|---------------|------|-------------|-------------|--------------|---------|
| 1      | 9.099         | VV   | 0.2341      | 1.04569e4   | 688.05212    | 98.6297 |
| 2      | 9.998         | VB   | 0.2857      | 145.28128   | 7.19936      | 1.3703  |

Enantiomeric excess: 97%, determined by HPLC (Daicel Chiralpak IG, hexane/isopropanol = 70/30, flow rate 0.8 mL/min, T = 25 °C, 230 nm):  $t_R = 9.100$ min (major),  $t_R = 9.998$  min (minor).

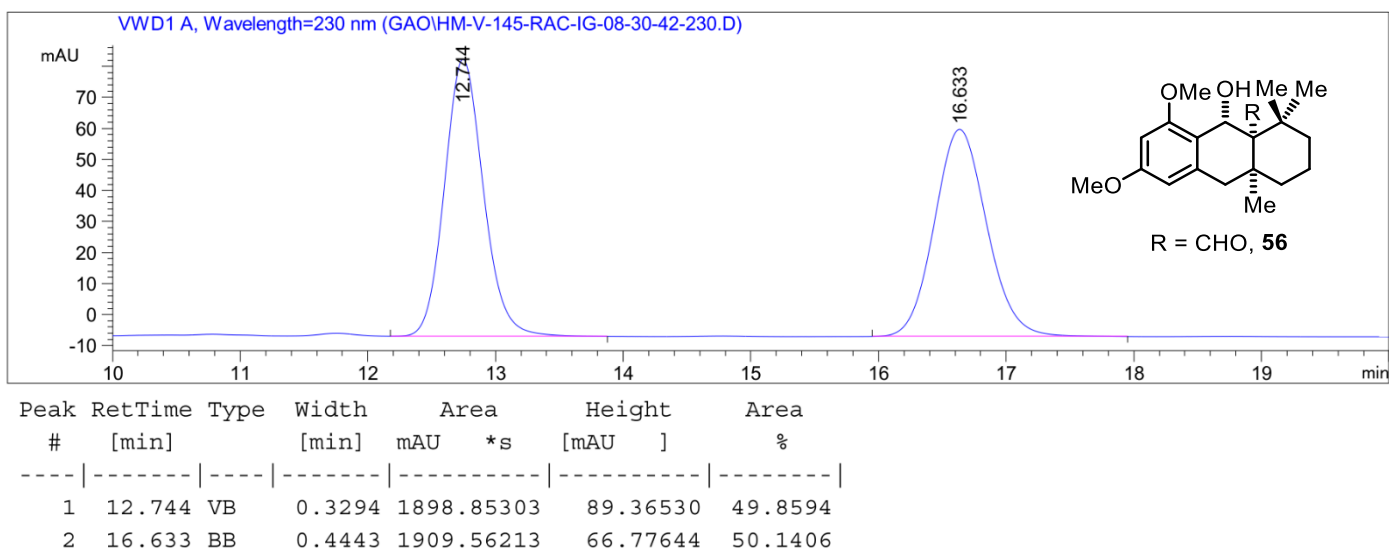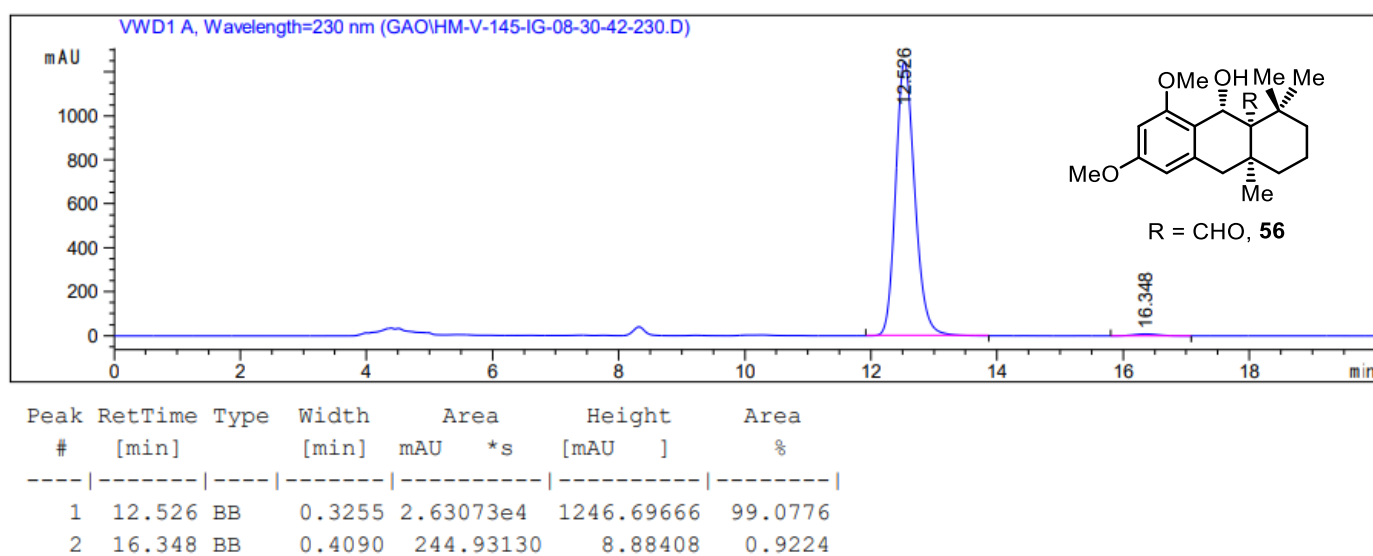

Enantiomeric excess: 98%, determined by HPLC (Daicel Chiralpak IG, hexane/isopropanol = 70/30, flow rate 0.8 mL/min, T = 25 °C, 230 nm):  $t_R = 12.526$ min (major),  $t_R = 16.350$  min (minor).

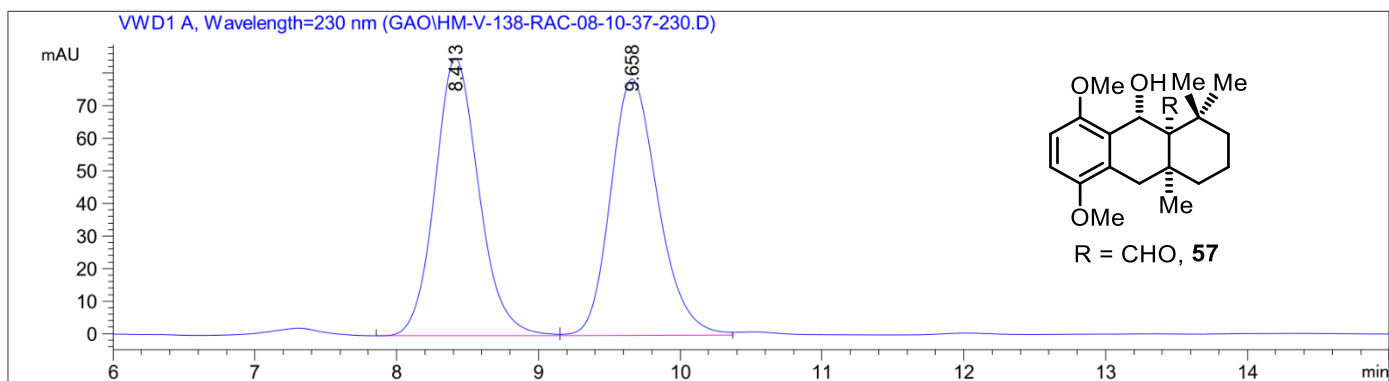

| Peak # | RetTime [min] | Type | Width [min] | Area mAU *s | Height [mAU] | Area %  |
|--------|---------------|------|-------------|-------------|--------------|---------|
| 1      | 8.413         | VV   | 0.3328      | 1835.69800  | 85.24306     | 49.8922 |
| 2      | 9.658         | VV   | 0.3602      | 1843.63147  | 78.82996     | 50.1078 |

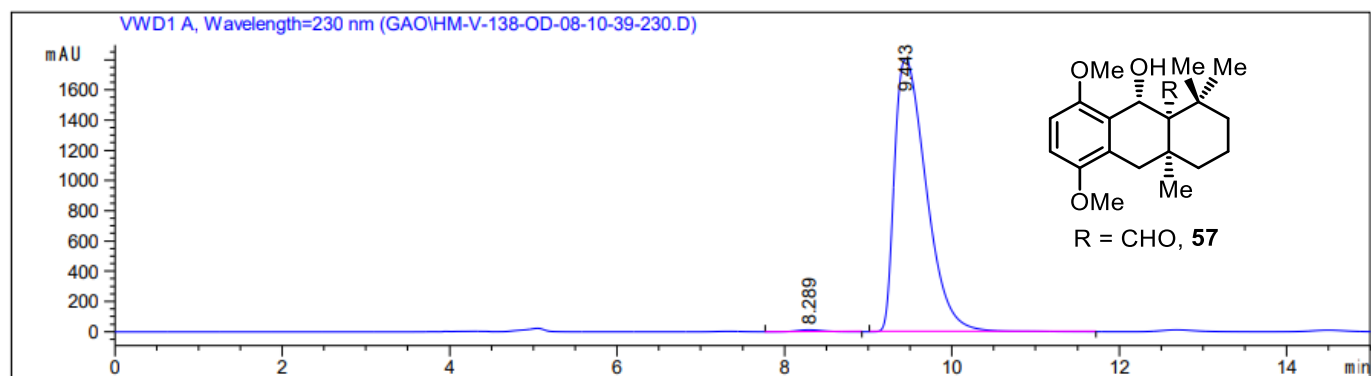

| Peak # | RetTime [min] | Type | Width [min] | Area mAU *s | Height [mAU] | Area %  |
|--------|---------------|------|-------------|-------------|--------------|---------|
| 1      | 8.289         | VB   | 0.3340      | 275.27118   | 12.86779     | 0.5755  |
| 2      | 9.443         | BB   | 0.4111      | 4.75568e4   | 1807.56763   | 99.4245 |

Enantiomeric excess: 99%, determined by HPLC (Daicel Chiralpak OD-H, hexane/isopropanol = 90/10, flow rate 0.8 mL/min, T = 25 °C, 230 nm):  $t_R = 8.289$ min (minor),  $t_R = 9.444$  min (major).

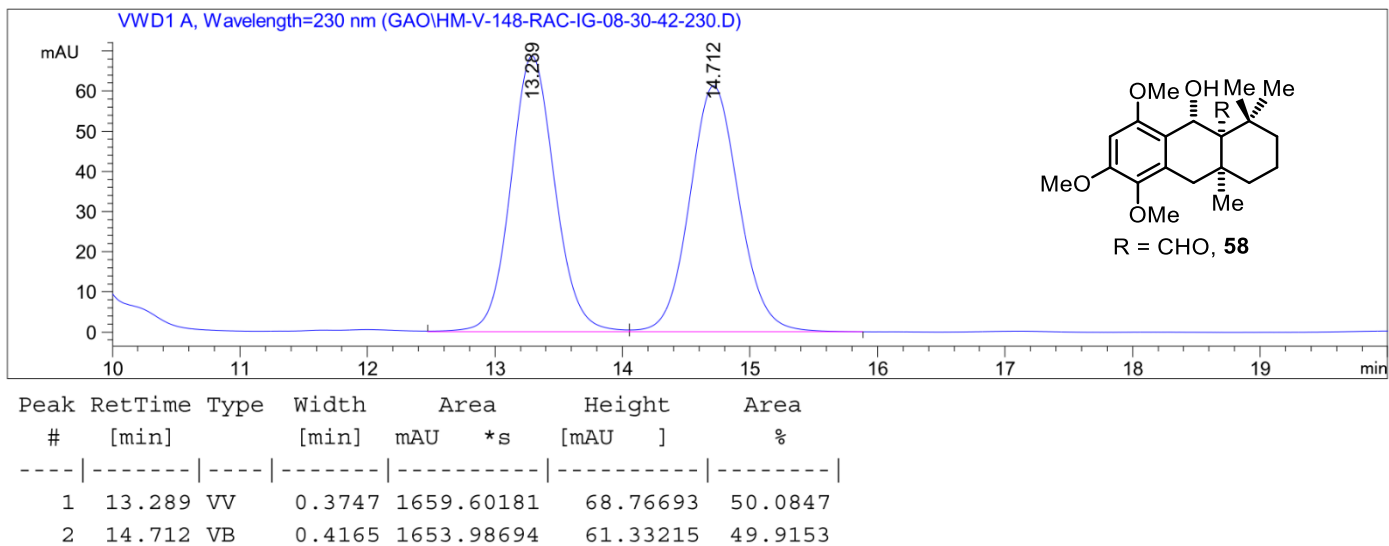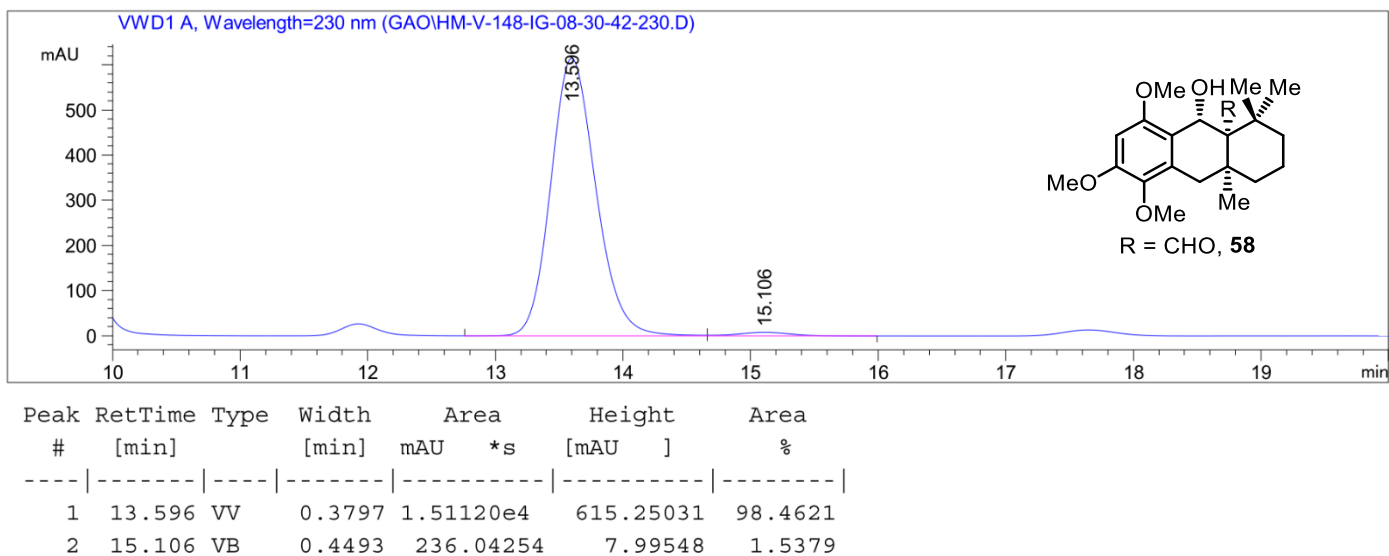

Enantiomeric excess: 97%, determined by HPLC (Daicel Chiralpak IG, hexane/isopropanol = 70/30, flow rate 0.8 mL/min, T = 25 °C, 230 nm):  $t_R = 13.596$ min (major),  $t_R = 15.106$  min (minor).

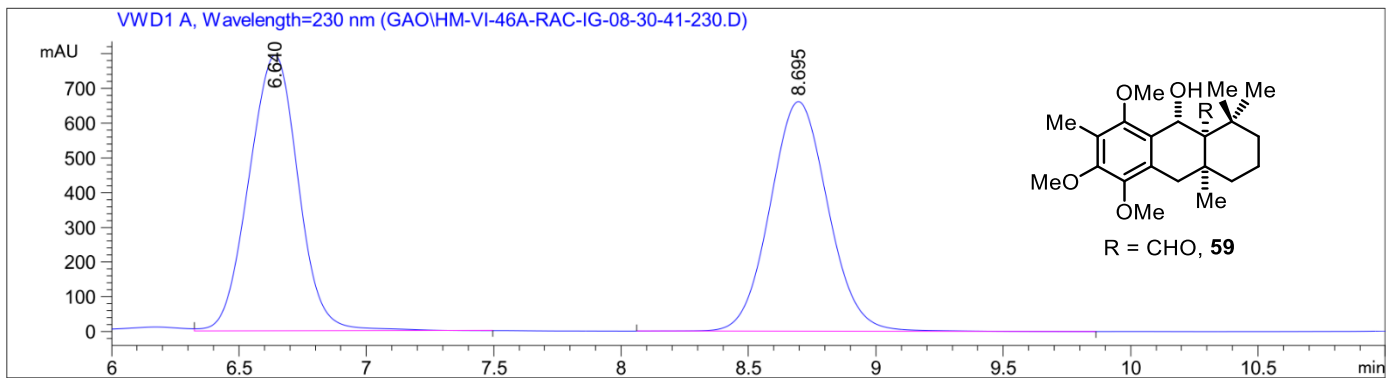

| Peak # | RetTime [min] | Type | Width [min] | Area mAU *s | Height [mAU] | Area %  |
|--------|---------------|------|-------------|-------------|--------------|---------|
| 1      | 6.640         | VB   | 0.2135      | 1.07152e4   | 794.03949    | 50.5896 |
| 2      | 8.695         | BB   | 0.2466      | 1.04654e4   | 661.00677    | 49.4104 |

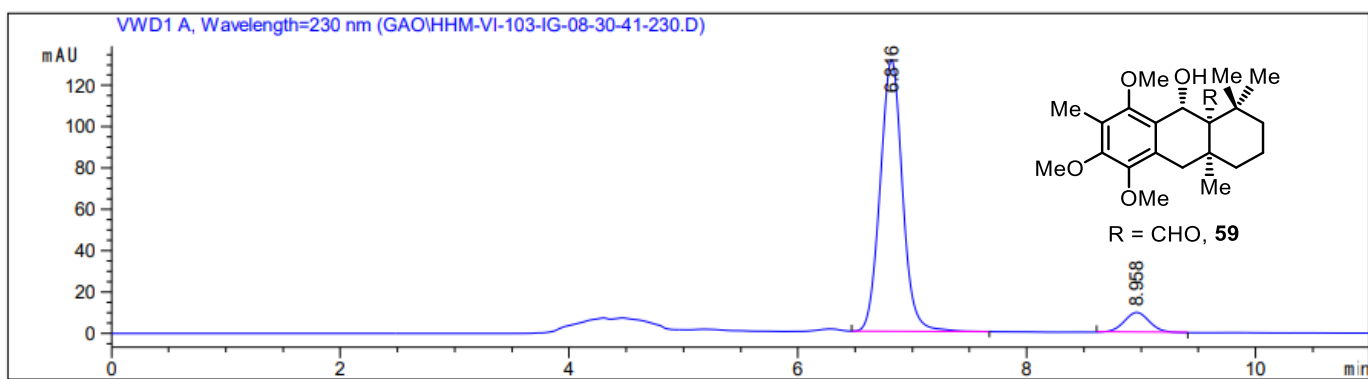

| Peak # | RetTime [min] | Type | Width [min] | Area mAU *s | Height [mAU] | Area %  |
|--------|---------------|------|-------------|-------------|--------------|---------|
| 1      | 6.816         | VB   | 0.2107      | 1786.66296  | 131.69502    | 92.2402 |
| 2      | 8.958         | BB   | 0.2398      | 150.30482   | 9.65612      | 7.7598  |

Enantiomeric excess: 85%, determined by HPLC (Daicel Chiralpak IG, hexane/isopropanol = 70/30, flow rate 0.8 mL/min, T = 25 °C, 230 nm):  $t_R = 6.816$ min (major),  $t_R = 8.958$  min (minor).

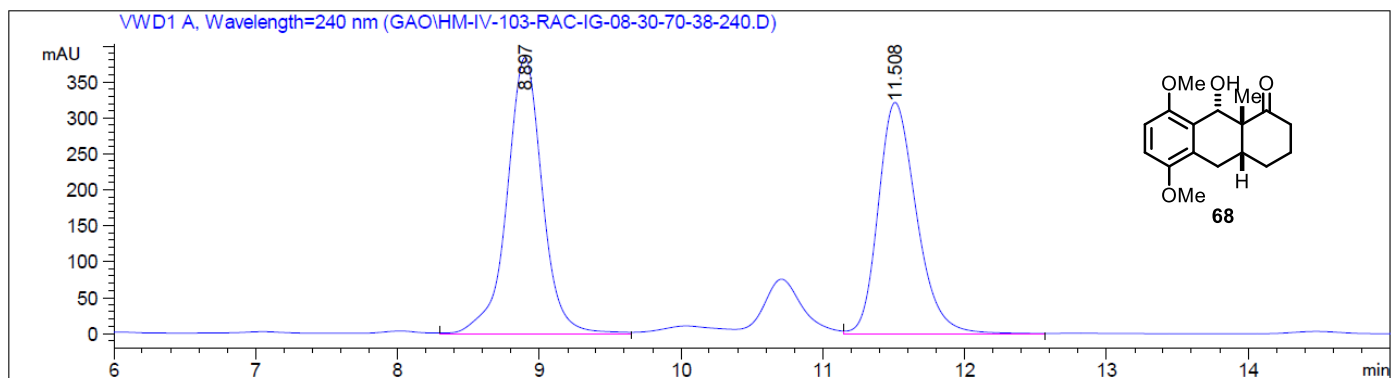

| Peak # | RetTime [min] | Type | Width [min] | Area mAU   | Area *s | Height [mAU] | Area %  |
|--------|---------------|------|-------------|------------|---------|--------------|---------|
| 1      | 8.897         | VV   | 0.2656      | 6683.90967 |         | 384.19742    | 52.5170 |
| 2      | 11.508        | VB   | 0.2889      | 6043.22754 |         | 321.85696    | 47.4830 |

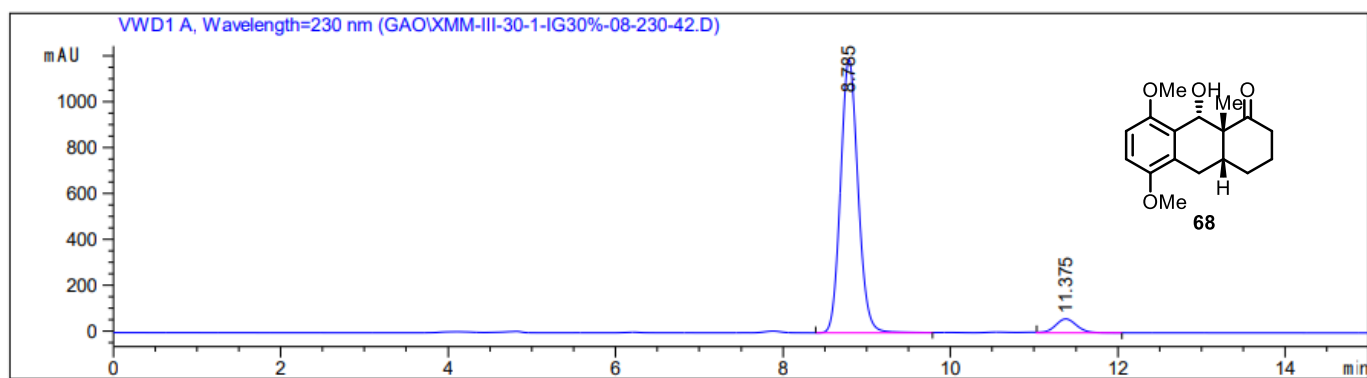

| Peak # | RetTime [min] | Type | Width [min] | Area mAU   | Area *s | Height [mAU] | Area %  |
|--------|---------------|------|-------------|------------|---------|--------------|---------|
| 1      | 8.785         | BV   | 0.2245      | 1.72702e4  |         | 1191.25793   | 94.1754 |
| 2      | 11.375        | VB   | 0.2720      | 1068.12903 |         | 60.77779     | 5.8246  |

Enantiomeric excess: 88%, determined by HPLC (Daicel Chiralpak IG, hexane/isopropanol = 70/30, flow rate 0.8 mL/min, T = 25 °C, 230 nm):  $t_R = 8.785$  min (major),  $t_R = 11.375$  min (minor).

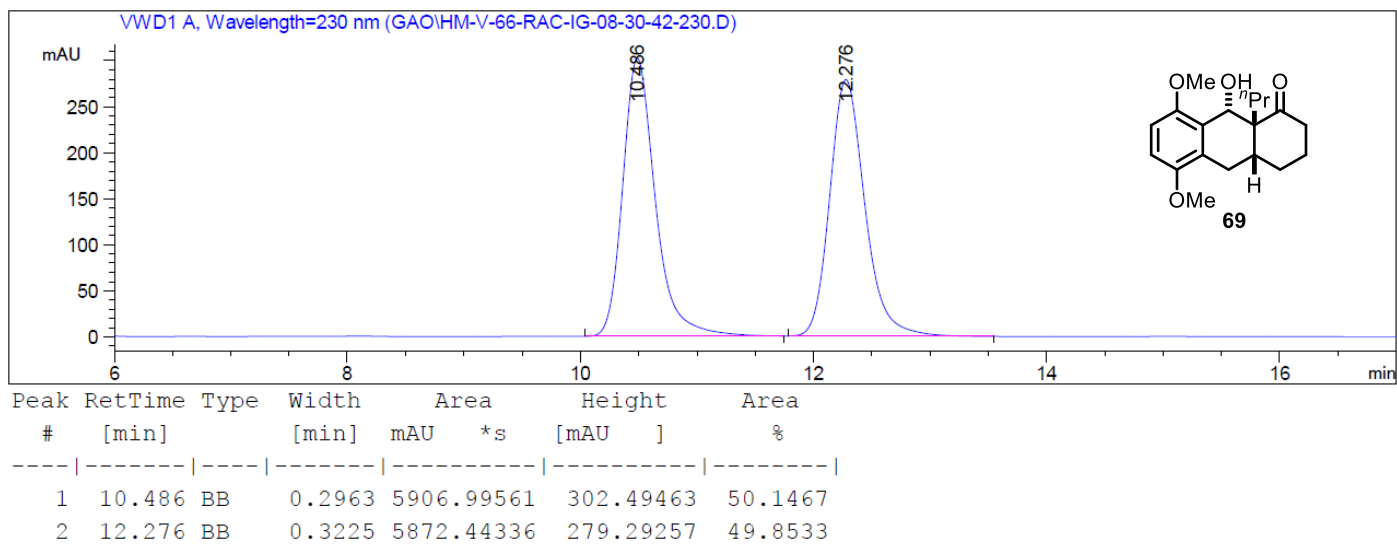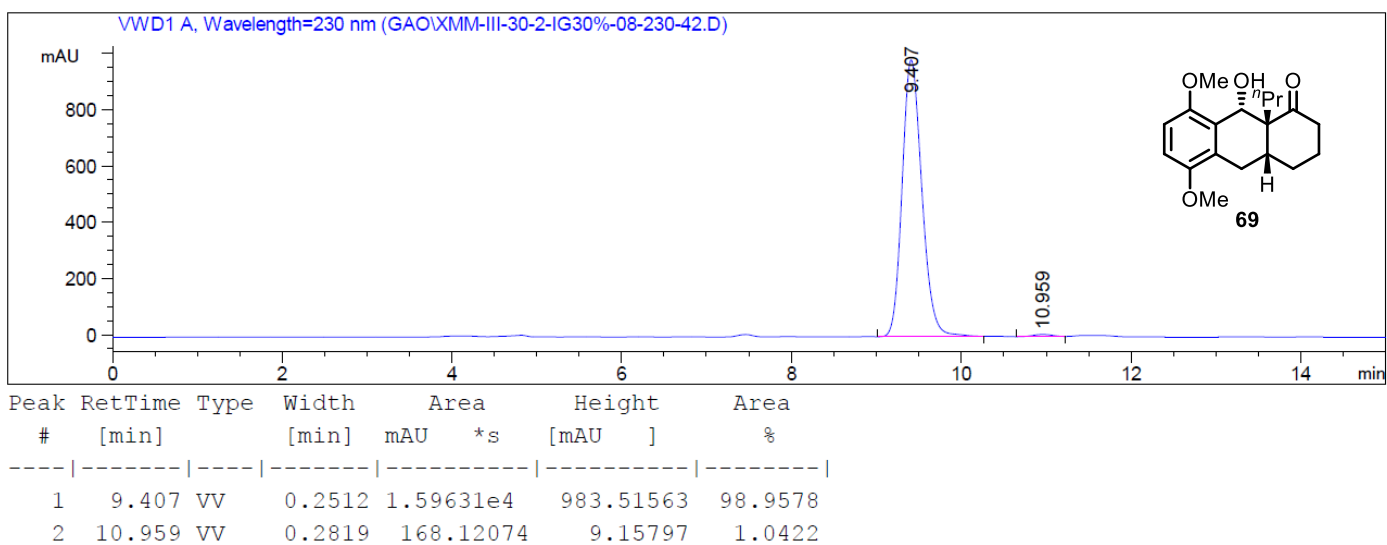

Enantiomeric excess: 98%, determined by HPLC (Daicel Chiralpak IG, hexane/isopropanol = 70/30, flow rate 0.8 mL/min, T = 25 °C, 230 nm):  $t_R = 9.407$  min (major),  $t_R = 10.959$  min (minor).



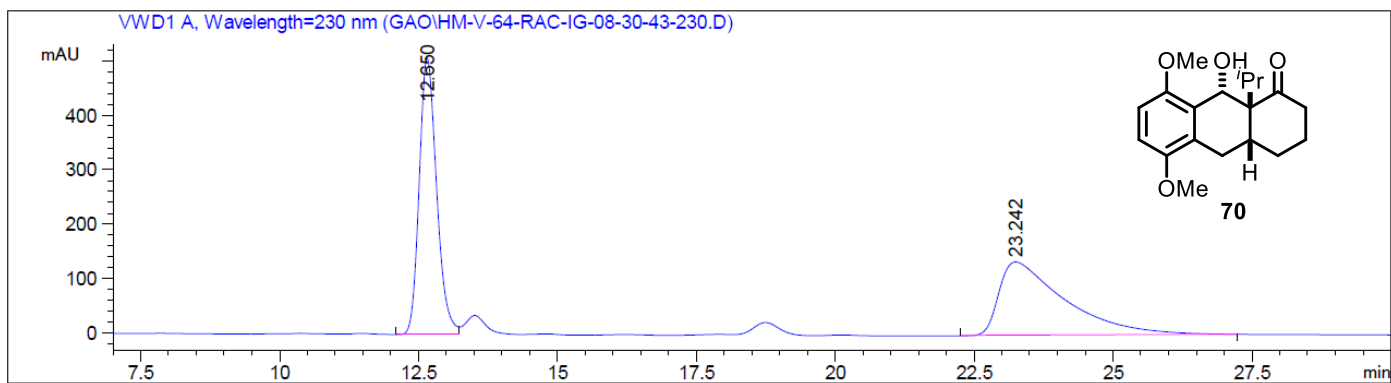

| Peak # | RetTime [min] | Type | Width [min] | Area mAU  | Area *s | Height [mAU] | Area %  |
|--------|---------------|------|-------------|-----------|---------|--------------|---------|
| 1      | 12.650        | VV   | 0.3363      | 1.10732e4 |         | 508.52756    | 49.7386 |
| 2      | 23.242        | BB   | 1.1618      | 1.11896e4 |         | 135.35439    | 50.2614 |

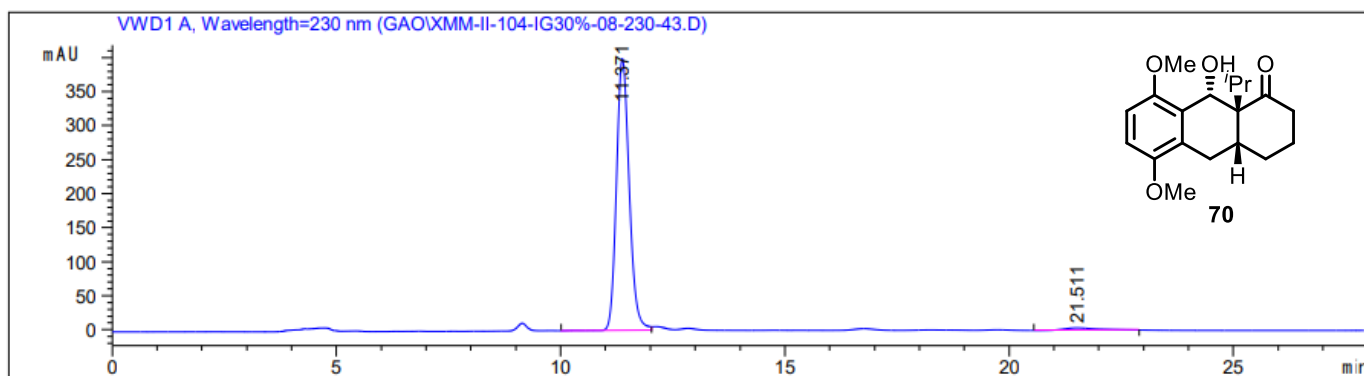

| Peak # | RetTime [min] | Type | Width [min] | Area mAU   | Area *s | Height [mAU] | Area %  |
|--------|---------------|------|-------------|------------|---------|--------------|---------|
| 1      | 11.371        | BV   | 0.3071      | 7951.16162 |         | 399.72507    | 97.6185 |
| 2      | 21.511        | VB   | 0.6289      | 193.97537  |         | 3.62334      | 2.3815  |

Enantiomeric excess: 95%, determined by HPLC (Daicel Chiralpak IG, hexane/isopropanol = 70/30, flow rate 0.8 mL/min, T = 25 °C, 230 nm):  $t_R = 11.371$  min (major),  $t_R = 21.511$  min (minor).

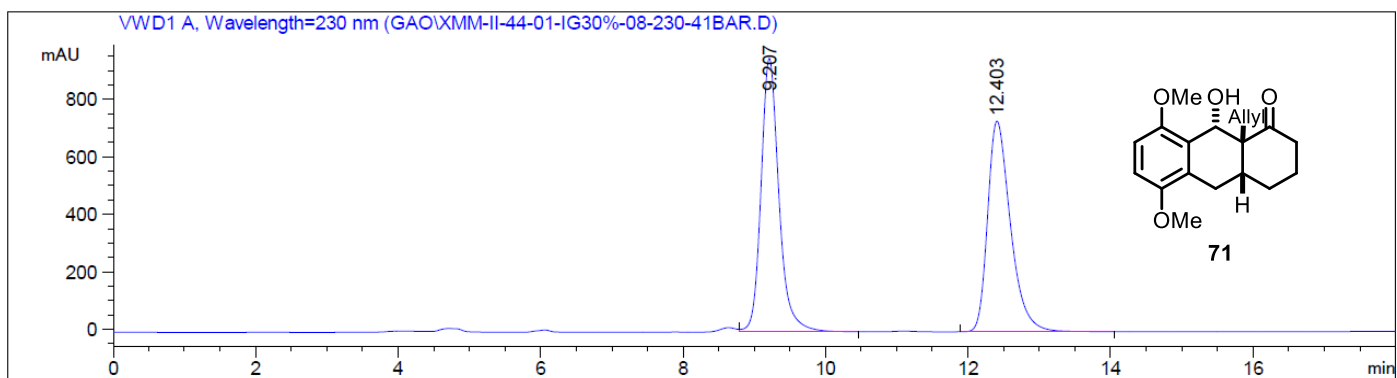

| Peak # | RetTime [min] | Type | Width [min] | Area mAU  | Area *s | Height [mAU] | Area %  |
|--------|---------------|------|-------------|-----------|---------|--------------|---------|
| 1      | 9.207         | VB   | 0.2657      | 1.66242e4 |         | 951.53357    | 50.4328 |
| 2      | 12.403        | BB   | 0.3395      | 1.63388e4 |         | 732.63623    | 49.5672 |

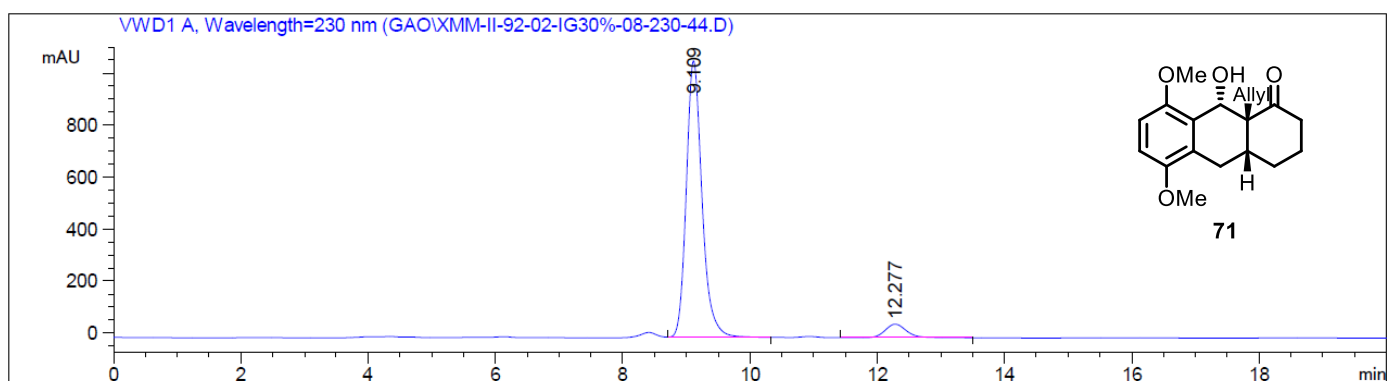

| Peak # | RetTime [min] | Type | Width [min] | Area mAU   | Area *s | Height [mAU] | Area %  |
|--------|---------------|------|-------------|------------|---------|--------------|---------|
| 1      | 9.109         | VB   | 0.2618      | 1.82931e4  |         | 1063.43567   | 93.6748 |
| 2      | 12.277        | BB   | 0.3633      | 1235.19958 |         | 52.08578     | 6.3252  |

Enantiomeric excess: 87%, determined by HPLC (Daicel Chiralpak IG, hexane/isopropanol = 70/30, flow rate 0.8 mL/min, T = 25 °C, 230 nm):  $t_R = 9.109$  min (major),  $t_R = 12.277$  min (minor).

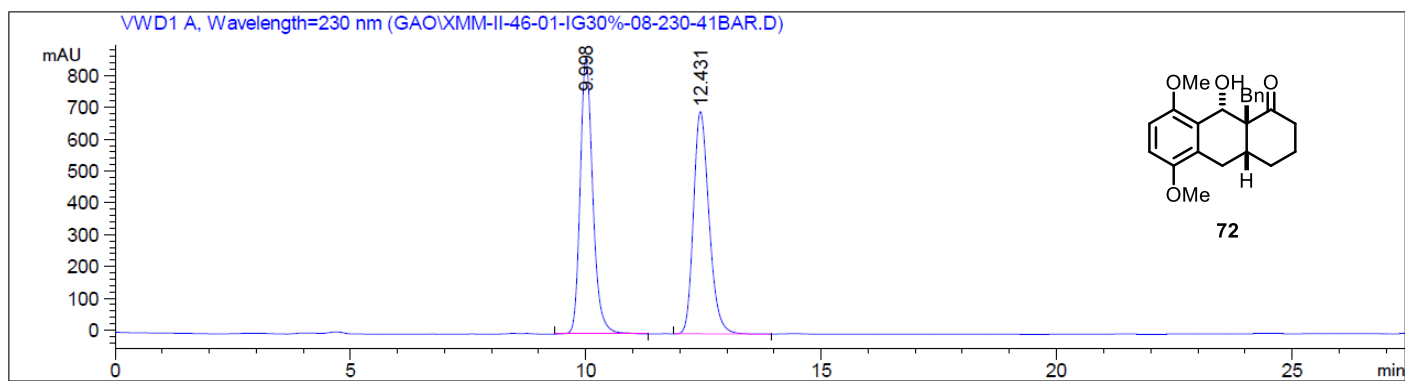

| Peak # | RetTime [min] | Type | Width [min] | Area mAU *s | Height [mAU] | Area %  |
|--------|---------------|------|-------------|-------------|--------------|---------|
| 1      | 9.998         | BB   | 0.2855      | 1.62257e4   | 866.18048    | 50.0757 |
| 2      | 12.431        | VB   | 0.3548      | 1.61766e4   | 700.06726    | 49.9243 |

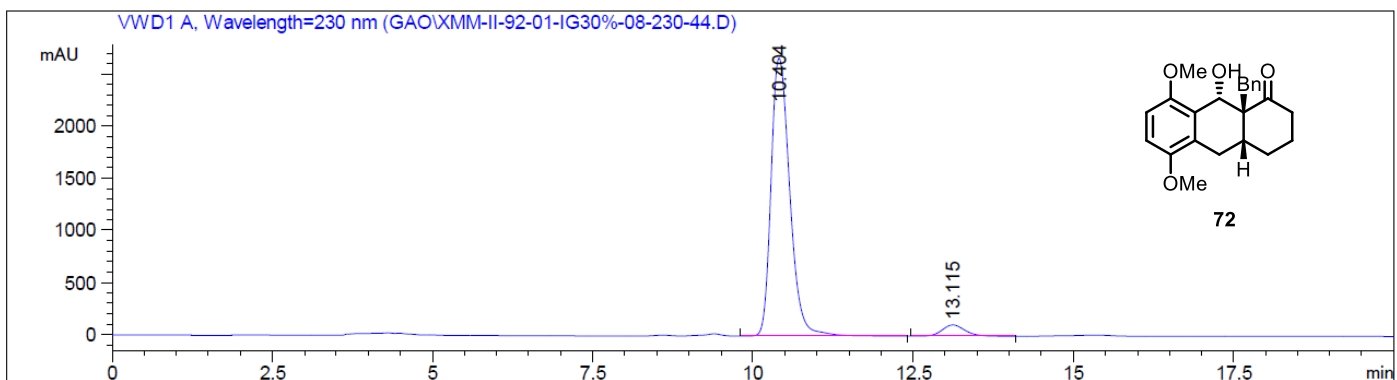

| Peak # | RetTime [min] | Type | Width [min] | Area mAU *s | Height [mAU] | Area %  |
|--------|---------------|------|-------------|-------------|--------------|---------|
| 1      | 10.404        | VB   | 0.3152      | 5.42699e4   | 2668.65454   | 95.2449 |
| 2      | 13.115        | BB   | 0.3821      | 2709.42383  | 108.59829    | 4.7551  |

Enantiomeric excess: 91%, determined by HPLC (Daicel Chiralpak IG, hexane/isopropanol = 70/30, flow rate 0.8 mL/min, T = 25 °C, 230 nm):  $t_R = 10.404$  min (major),  $t_R = 13.115$  min (minor).

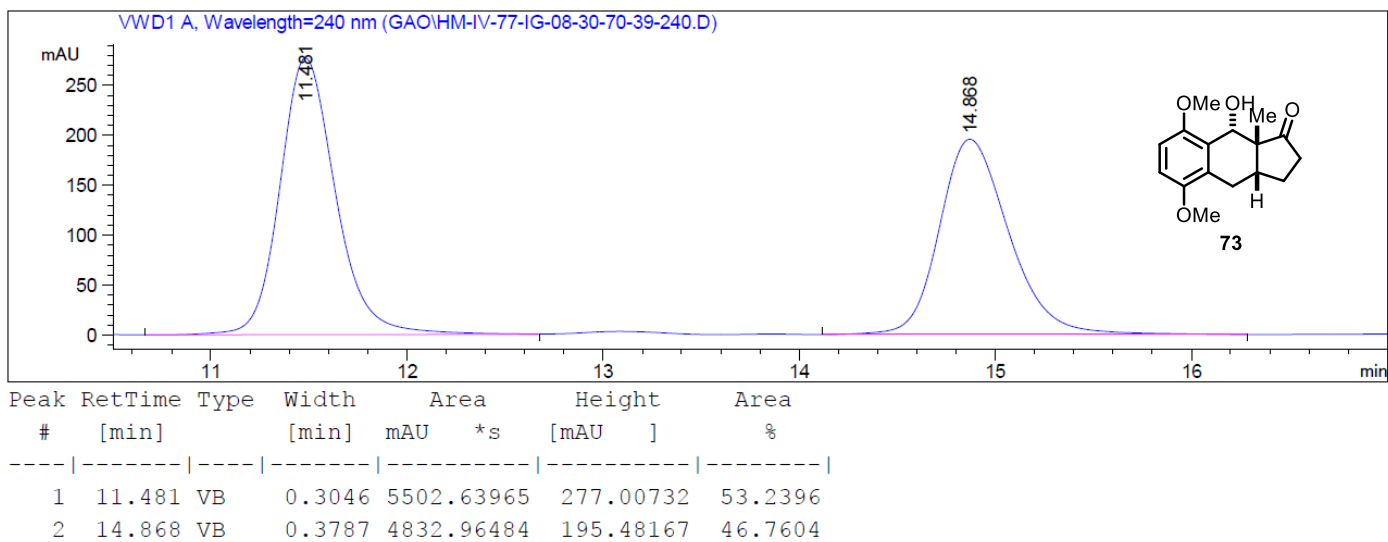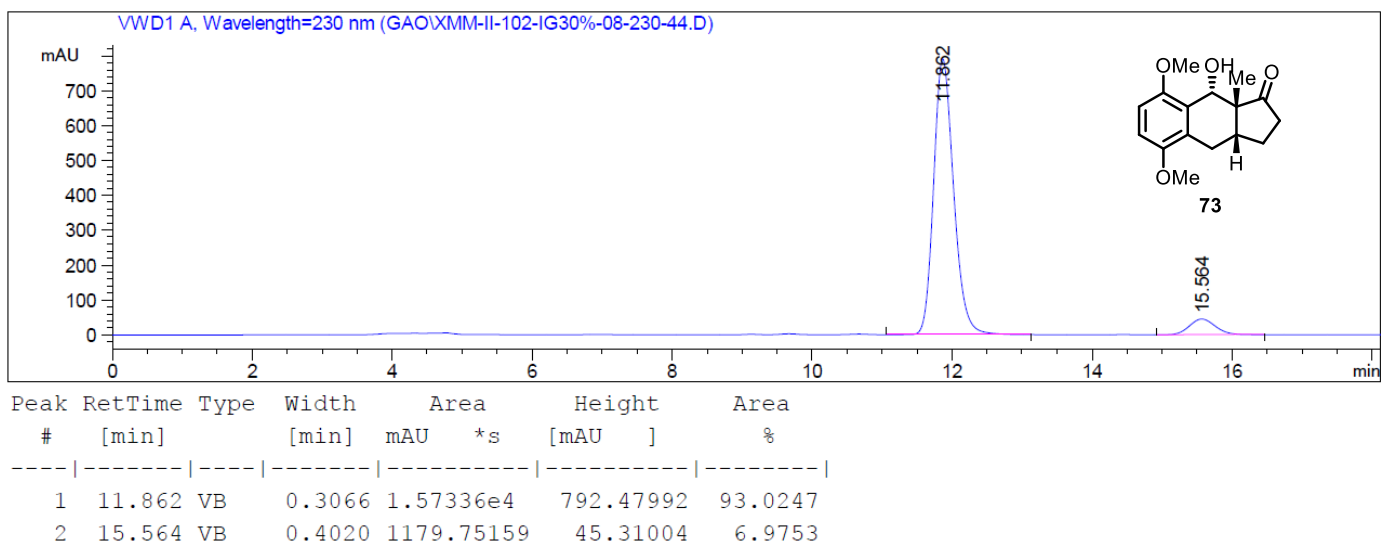

Enantiomeric excess: 86%, determined by HPLC (Daicel Chiralpak IG, hexane/isopropanol = 70/30, flow rate 0.8 mL/min, T = 25 °C, 230 nm):  $t_R$  = 11.862 min (major),  $t_R$  = 15.564 min (minor).

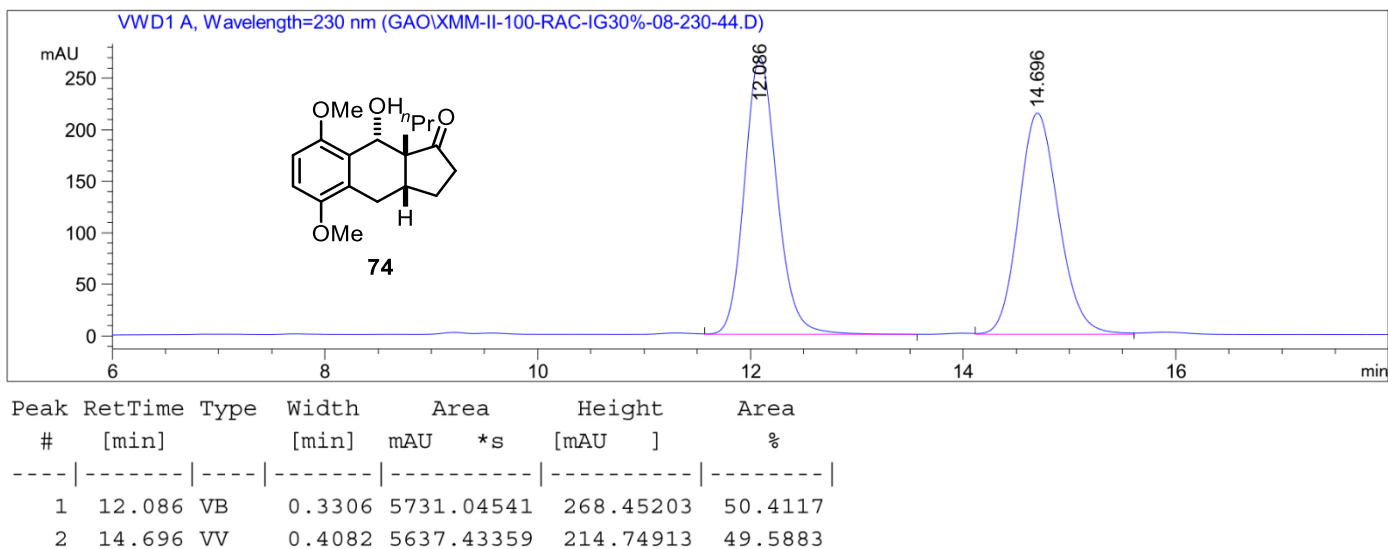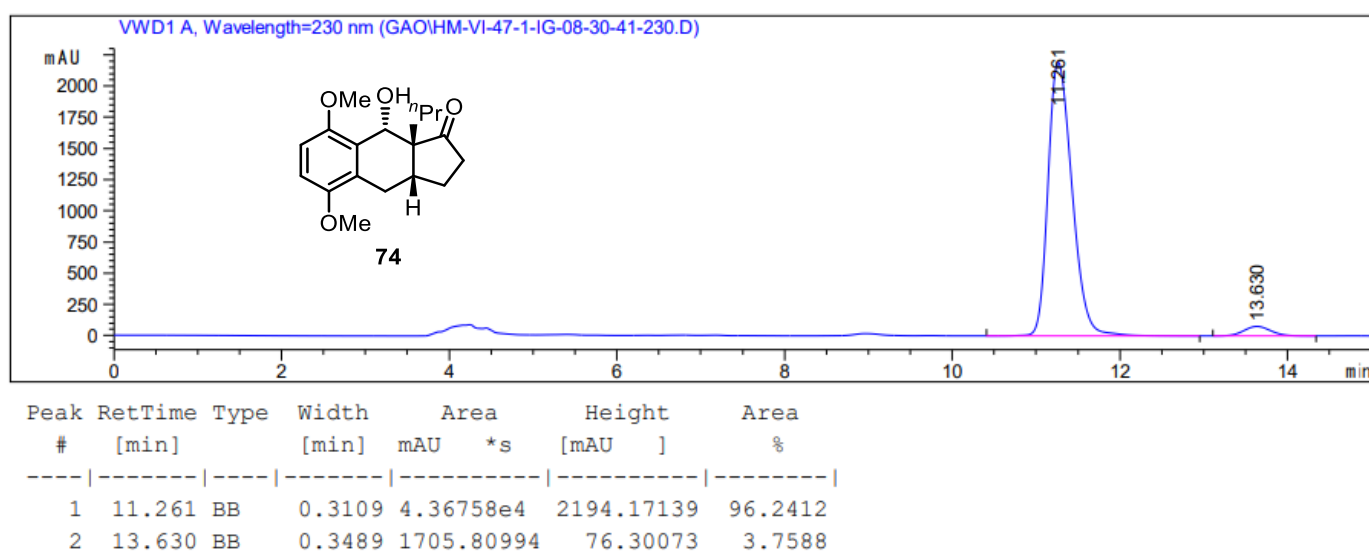

Enantiomeric excess: 92%, determined by HPLC (Daicel Chiralpak IG, hexane/isopropanol = 70/30, flow rate 0.8 mL/min, T = 25 °C, 230 nm):  $t_R$  = 11.261min (major),  $t_R$  = 13.630 min (minor).

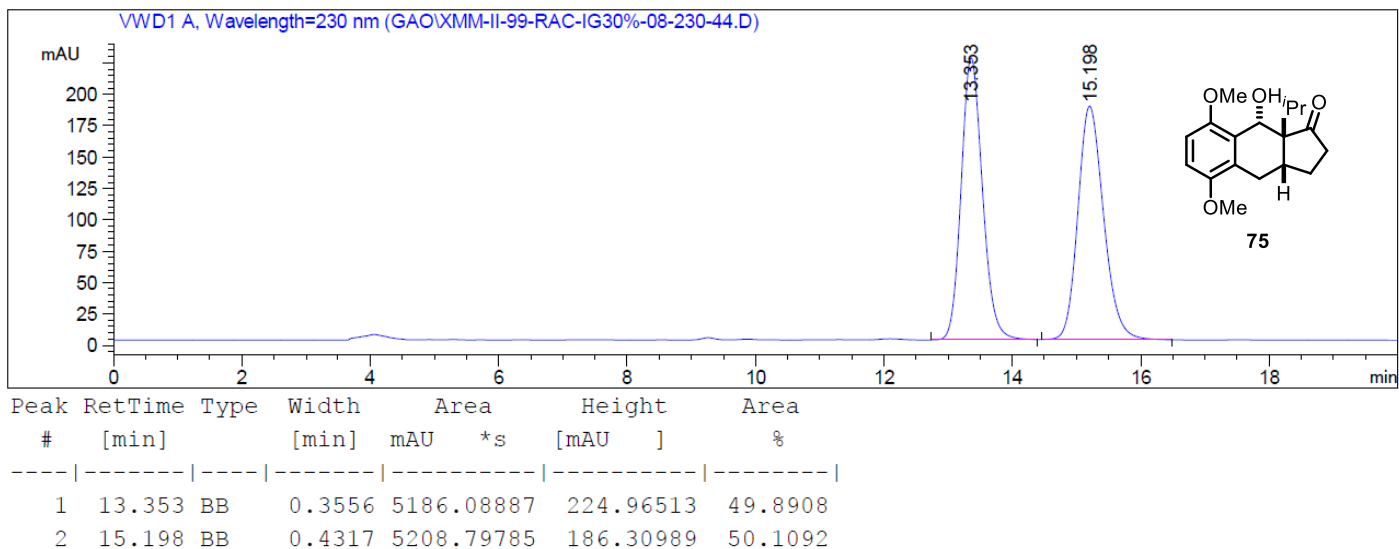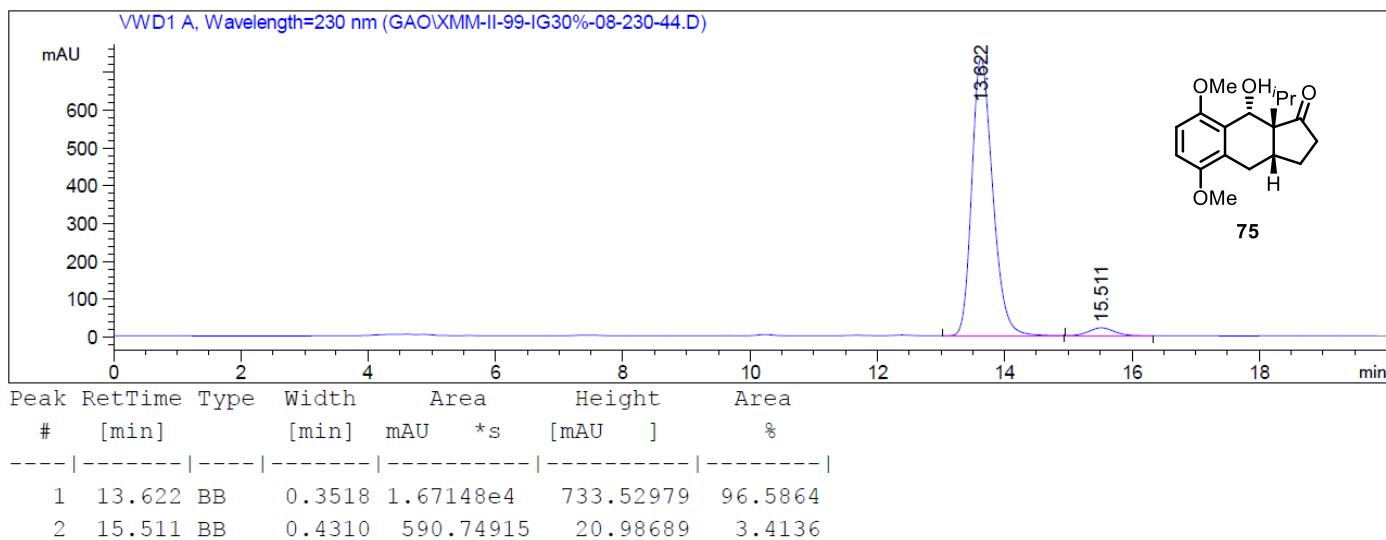

Enantiomeric excess: 93%, determined by HPLC (Daicel Chiralpak IG, hexane/isopropanol = 70/30, flow rate 0.8 mL/min, T = 25 °C, 230 nm):  $t_R$  = 13.622 min (major),  $t_R$  = 15.511 min (minor).

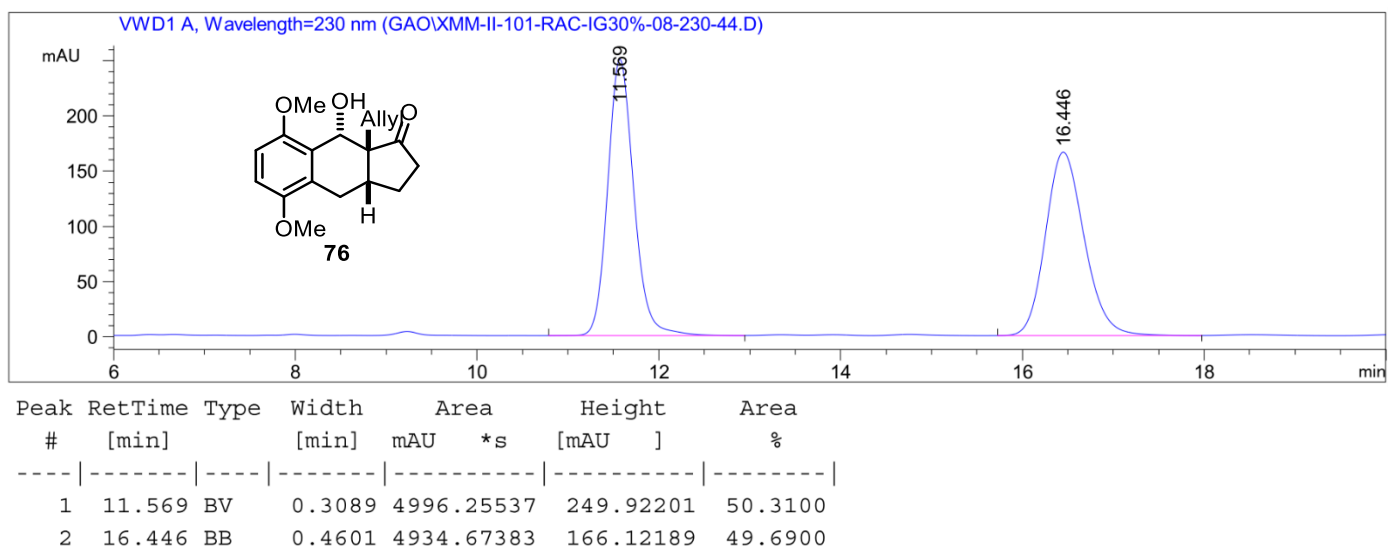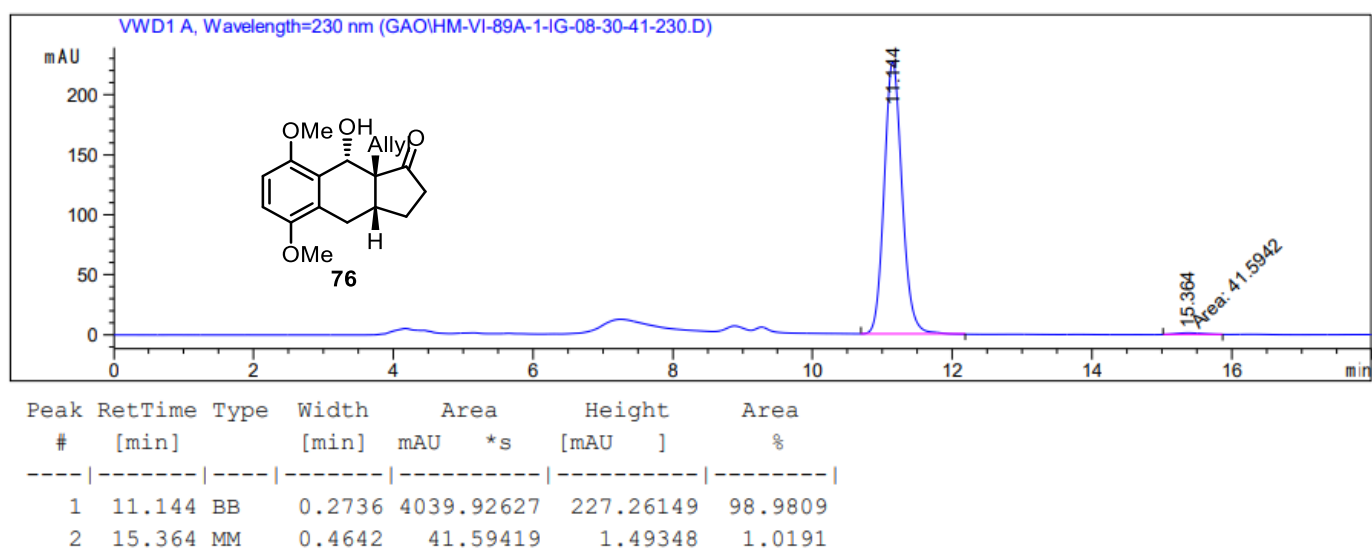

Enantiomeric excess: 99.5%, determined by HPLC (Daicel Chiralpak IG, hexane/isopropanol = 70/30, flow rate 0.8 mL/min, T = 25 °C, 230 nm):  $t_R = 11.144$ min (major),  $t_R = 16.277$  min (minor).

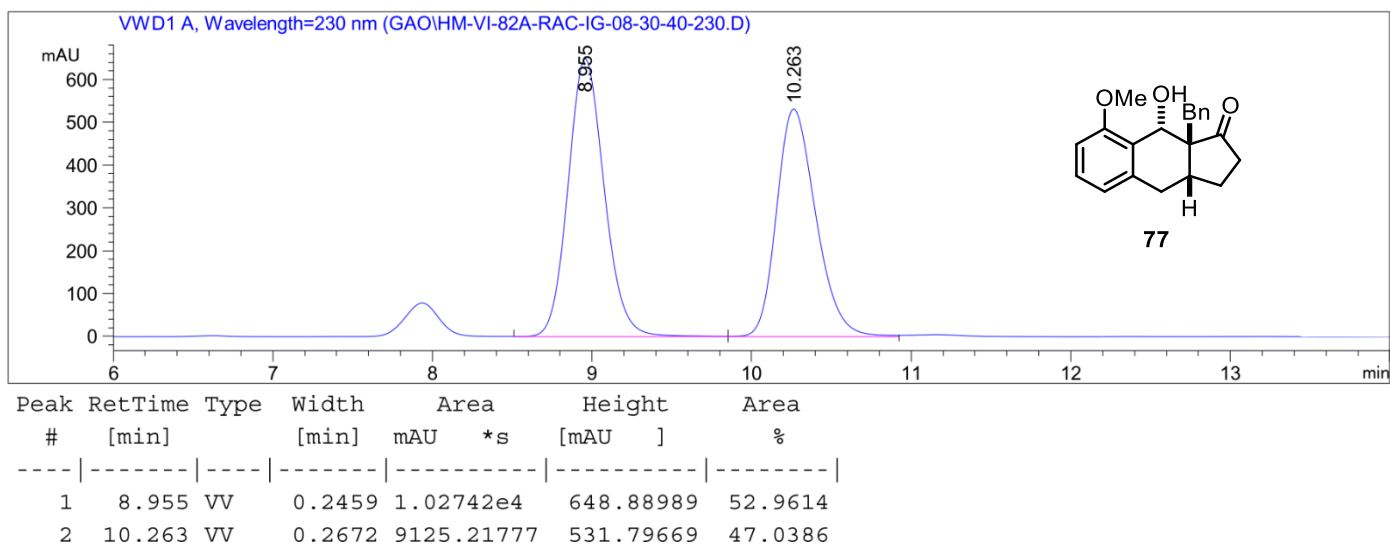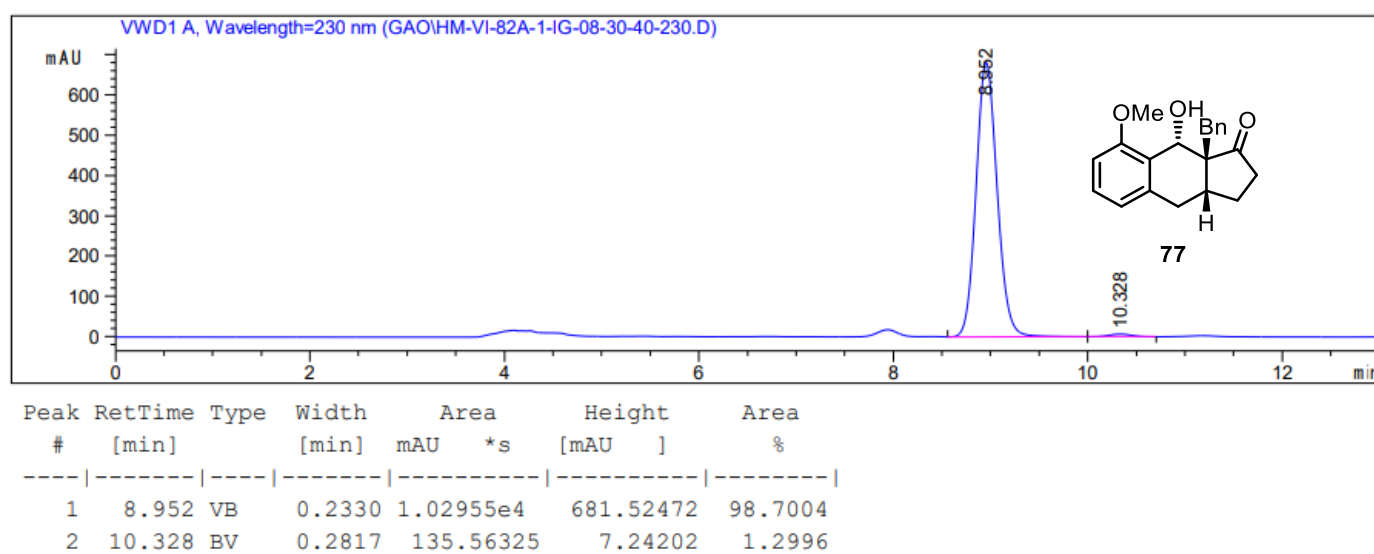

Enantiomeric excess: 97%, determined by HPLC (Daicel Chiralpak IG, hexane/isopropanol = 70/30, flow rate 0.8 mL/min, T = 25 °C, 230 nm):  $t_R = 8.952$  min (major),  $t_R = 10.329$  min (minor).



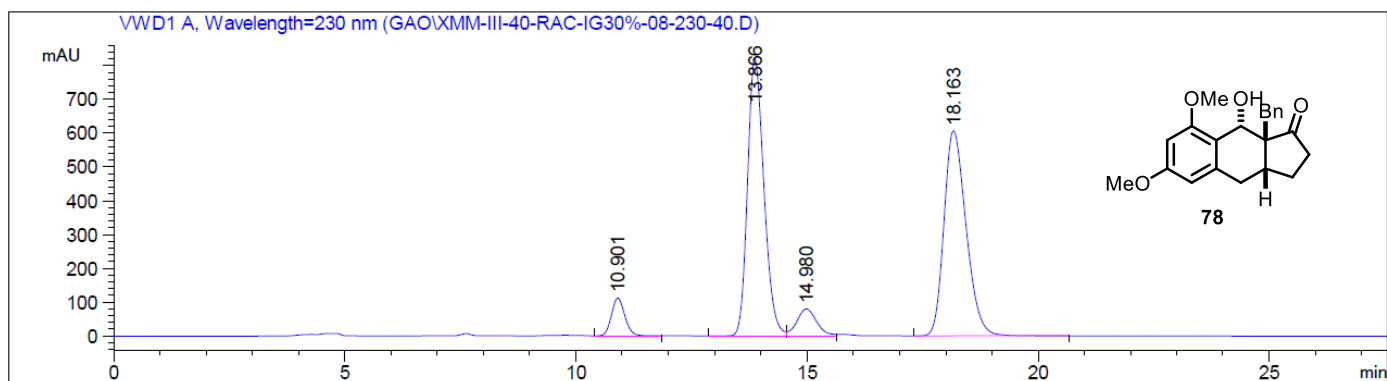

| Peak # | RetTime [min] | Type | Width [min] | Area mAU   | Area *s | Height [mAU] | Area %  |
|--------|---------------|------|-------------|------------|---------|--------------|---------|
| 1      | 10.901        | VV   | 0.3139      | 2292.34839 |         | 112.28703    | 5.0710  |
| 2      | 13.866        | VV   | 0.3877      | 2.02943e4  |         | 820.03088    | 44.8935 |
| 3      | 14.980        | VV   | 0.4582      | 2389.81934 |         | 80.23035     | 5.2866  |
| 4      | 18.163        | VB   | 0.5166      | 2.02289e4  |         | 607.56891    | 44.7489 |

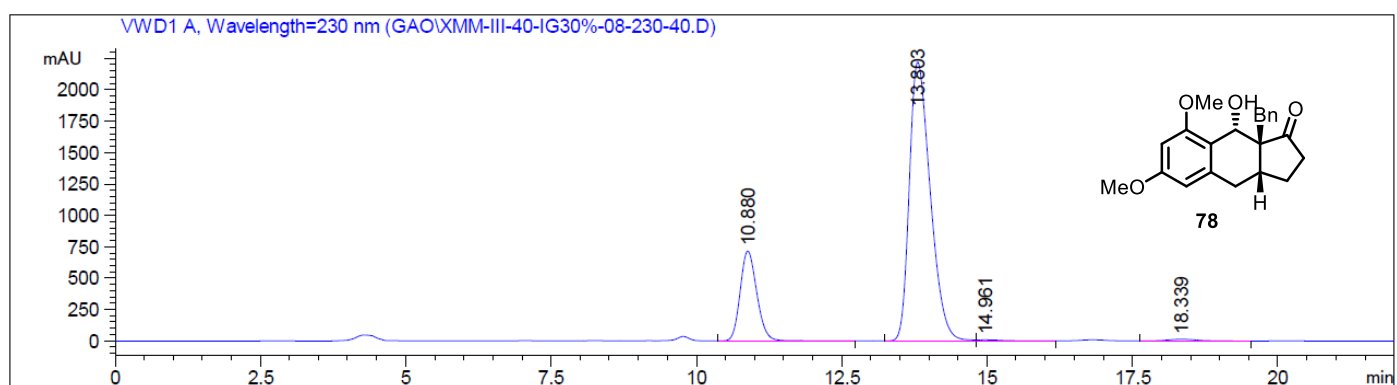

| Peak # | RetTime [min] | Type | Width [min] | Area mAU  | Area *s | Height [mAU] | Area %  |
|--------|---------------|------|-------------|-----------|---------|--------------|---------|
| 1      | 10.880        | VB   | 0.3092      | 1.43332e4 |         | 716.09564    | 20.2626 |
| 2      | 13.803        | BV   | 0.3855      | 5.56490e4 |         | 2220.89697   | 78.6701 |
| 3      | 14.961        | VV   | 0.4713      | 277.80914 |         | 8.57191      | 0.3927  |
| 4      | 18.339        | VB   | 0.5269      | 477.12805 |         | 13.96011     | 0.6745  |

Enantiomeric excess: 96% (minor), determined by HPLC (Daicel Chiralpak IG, hexane/isopropanol = 70/30, flow rate 0.8 mL/min, T = 25 °C, 230 nm):  $t_R$  = 10.880 min (major),  $t_R$  = 14.961 min (minor).

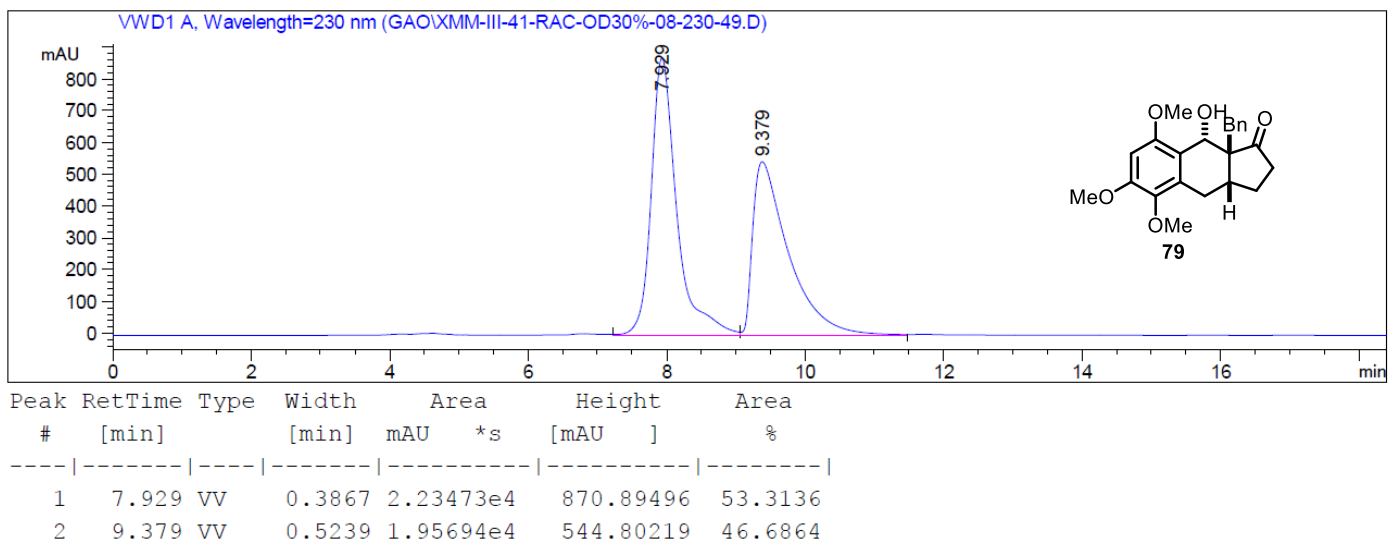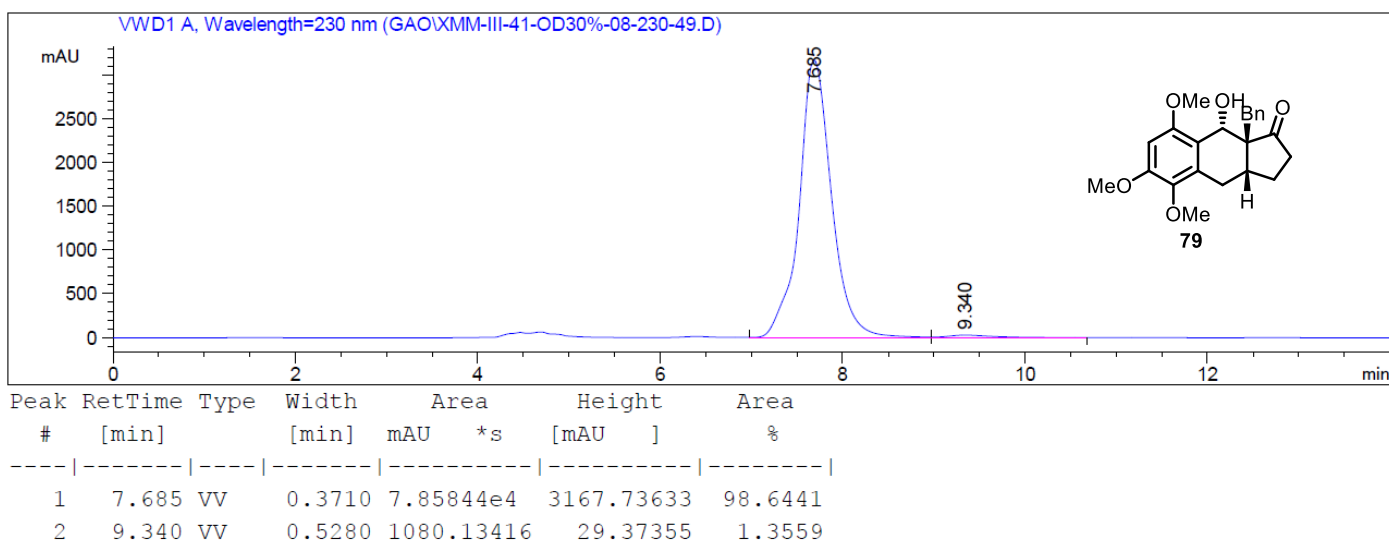

Enantiomeric excess: 97% (major), determined by HPLC (Daicel Chiralpak OD-H, hexane/isopropanol = 70/30, flow rate 0.8 mL/min, T = 25 °C, 230 nm):  $t_R$  = 7.685 min (major),  $t_R$  = 9.340 min (minor).

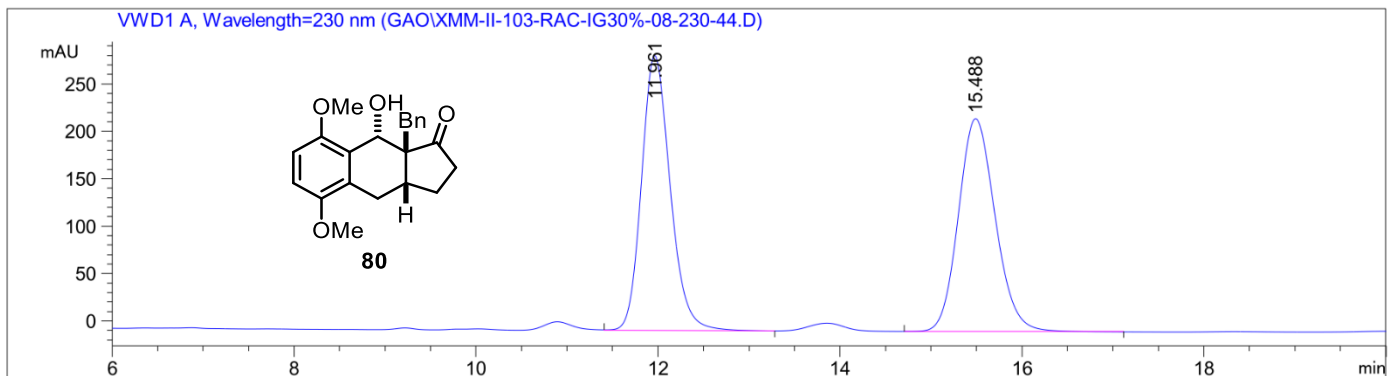

| Peak # | RetTime [min] | Type | Width [min] | Area mAU *s | Height [mAU] | Area %  |
|--------|---------------|------|-------------|-------------|--------------|---------|
| 1      | 11.961        | VV   | 0.3407      | 6371.28760  | 290.07532    | 50.1976 |
| 2      | 15.488        | VB   | 0.4393      | 6321.12305  | 224.40778    | 49.8024 |

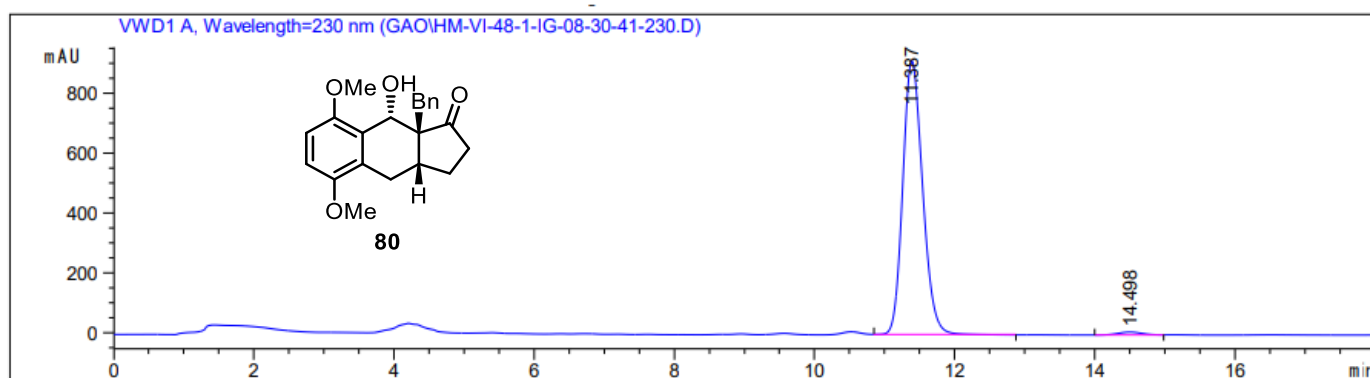

| Peak # | RetTime [min] | Type | Width [min] | Area mAU *s | Height [mAU] | Area %  |
|--------|---------------|------|-------------|-------------|--------------|---------|
| 1      | 11.387        | VB   | 0.3051      | 1.80526e4   | 915.12561    | 98.6579 |
| 2      | 14.498        | BV   | 0.3758      | 245.57904   | 9.85835      | 1.3421  |

Enantiomeric excess: 97%, determined by HPLC (Daicel Chiralpak IG, hexane/isopropanol = 70/30, flow rate 0.8 mL/min, T = 25 °C, 230 nm):  $t_R = 11.387$ min (major),  $t_R = 14.498$  min (minor).

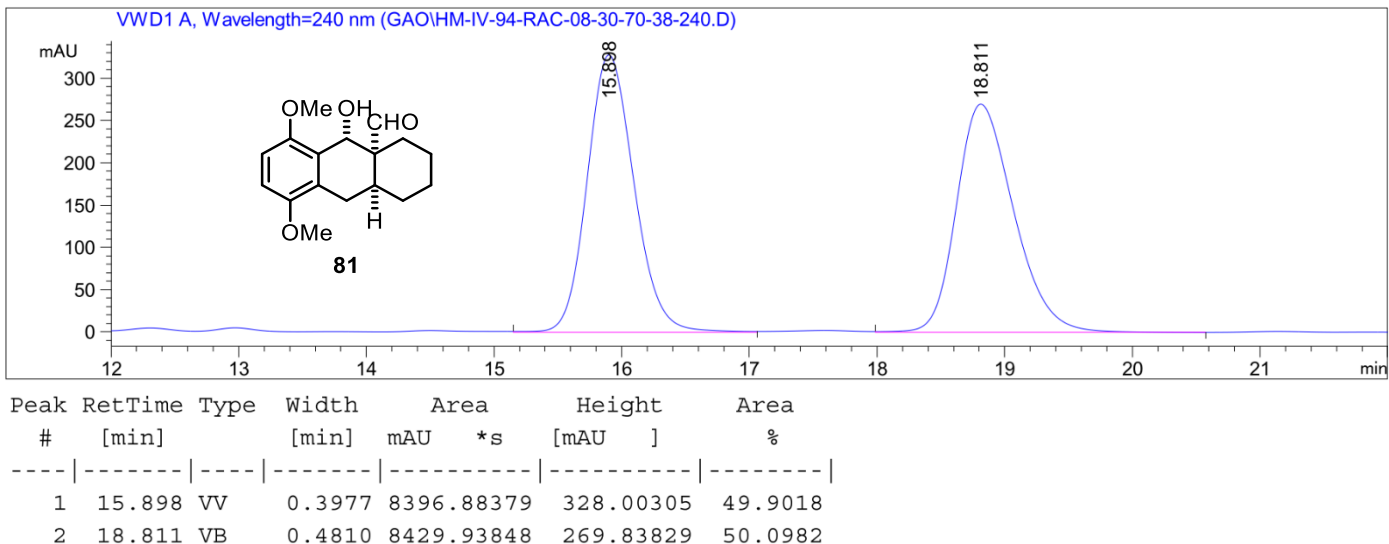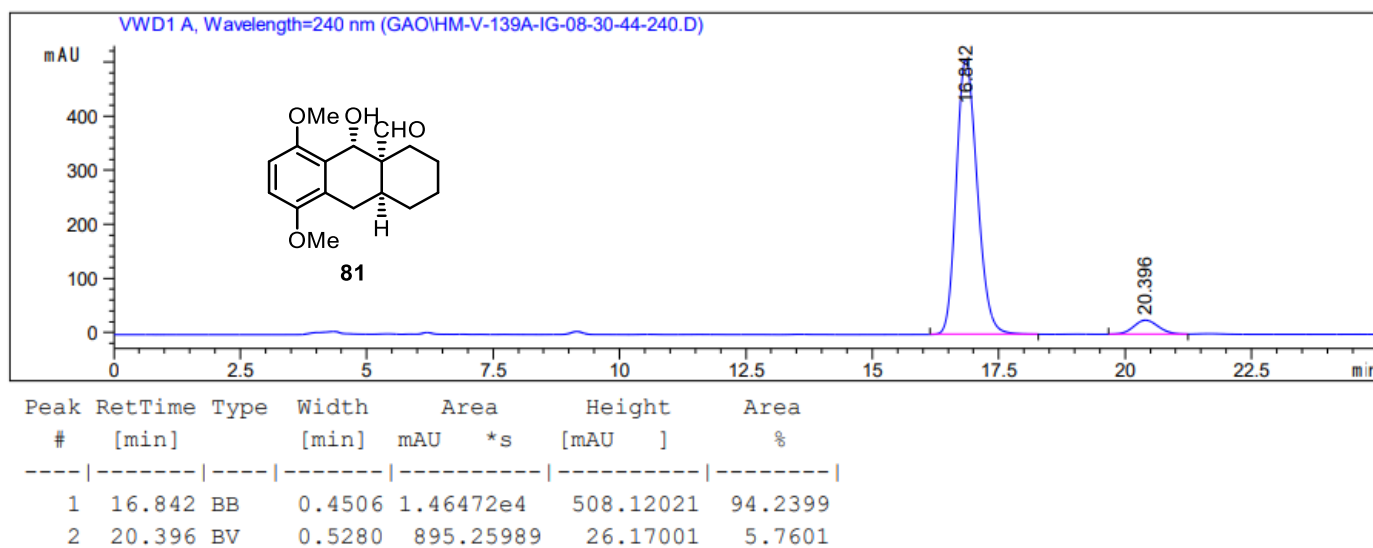

Enantiomeric excess: 88%, determined by HPLC (Daicel Chiralpak IG, hexane/isopropanol = 70/30, flow rate 0.8 mL/min, T = 25 °C, 240 nm):  $t_R = 16.842$ min (major),  $t_R = 20.397$  min (minor).

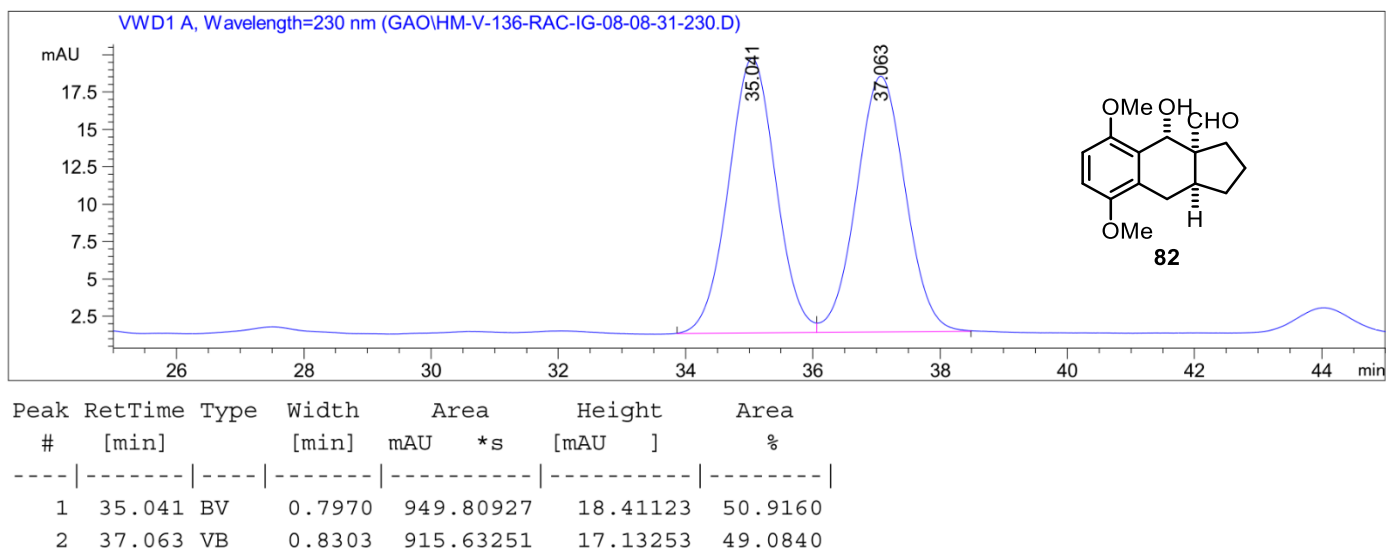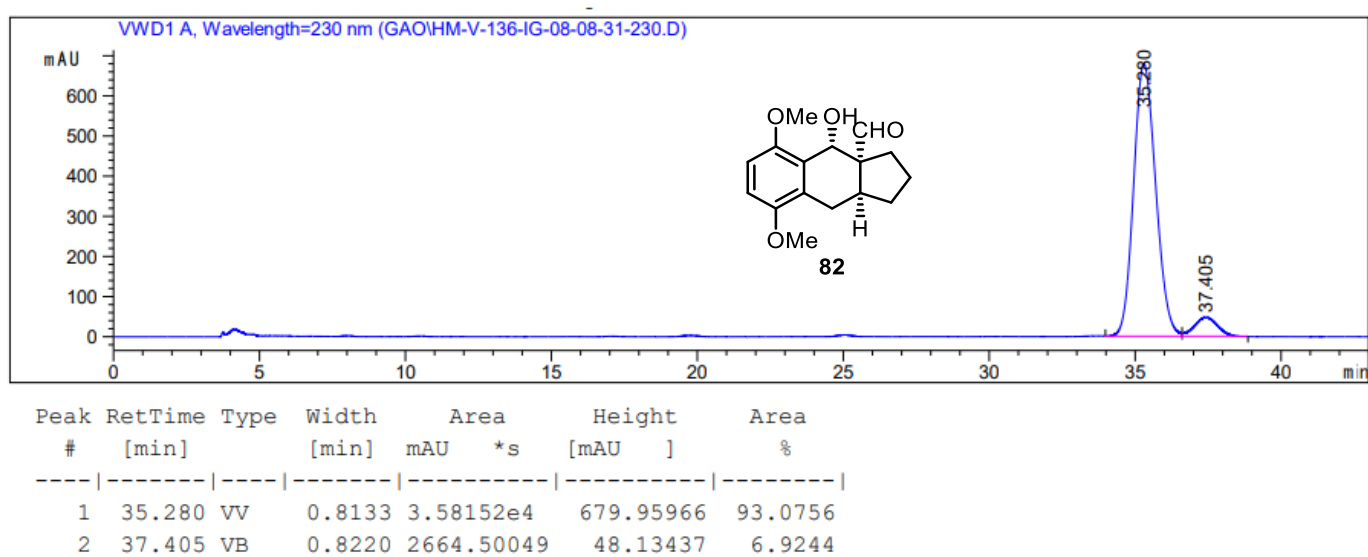

Enantiomeric excess: 86%, determined by HPLC (Daicel Chiralpak IG, hexane/isopropanol = 92/ 8, flow rate 0.8 mL/min, T = 25 °C, 230 nm):  $t_R = 35.280\text{min}$  (major),  $t_R = 37.406\text{ min}$  (minor).

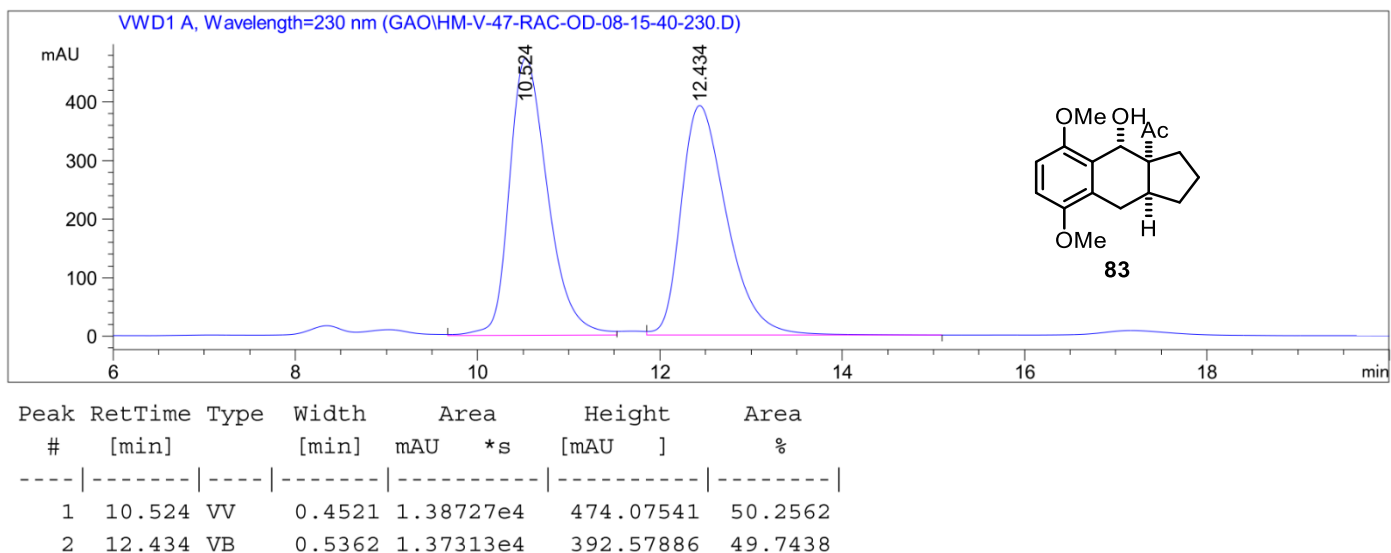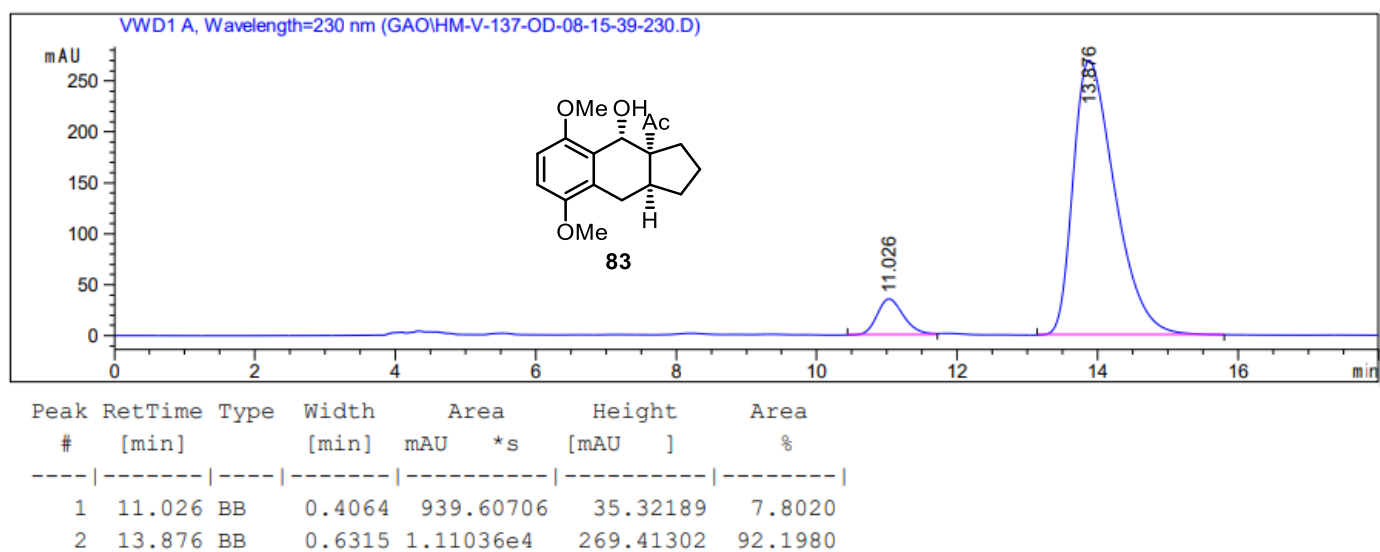

Enantiomeric excess: 84%, determined by HPLC (Daicel Chiralpak OD-H, hexane/isopropanol = 85/15, flow rate 0.8 mL/min, T = 25 °C, 230 nm):  $t_R = 11.026$ min (minor),  $t_R = 13.877$  min (major).

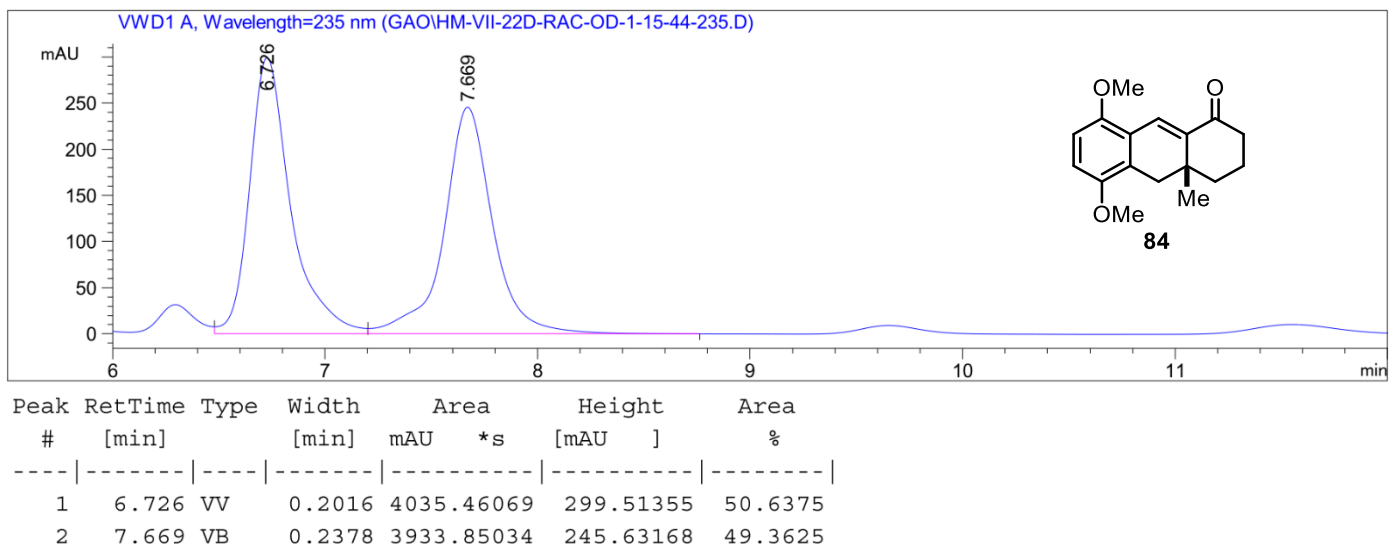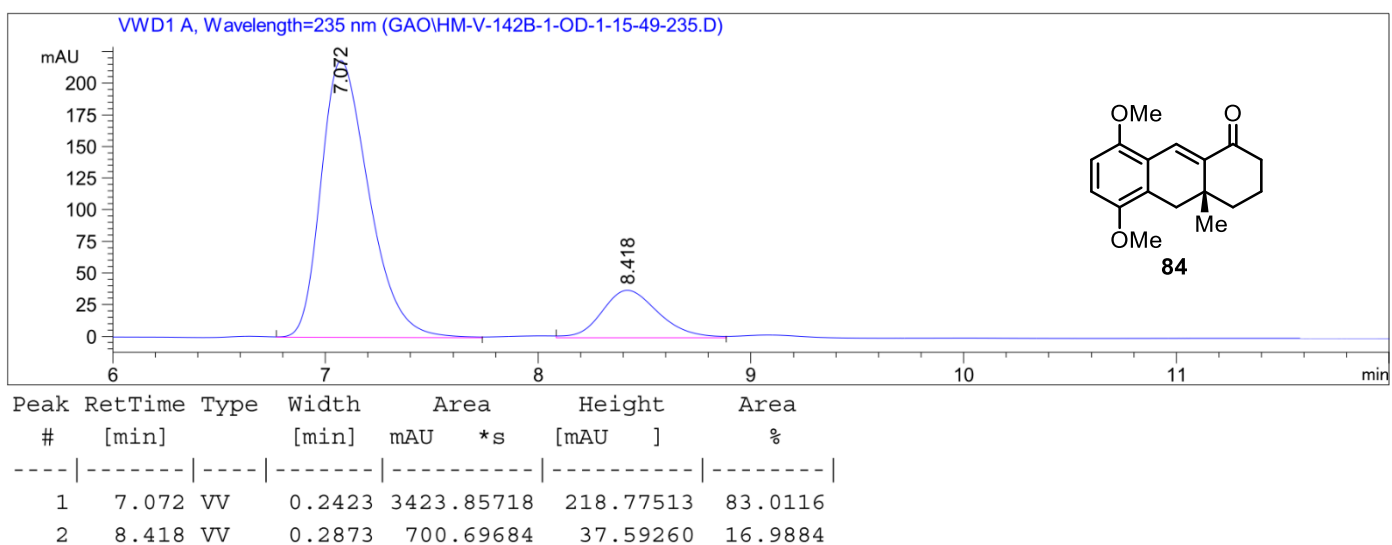

Enantiomeric excess: 66%, determined by HPLC (Daicel Chiralpak OD-H, hexane/isopropanol = 85/15, flow rate 1.0 mL/min, T = 25 °C, 230 nm):  $t_R = 7.072$  min (major),  $t_R = 8.418$  min (minor).

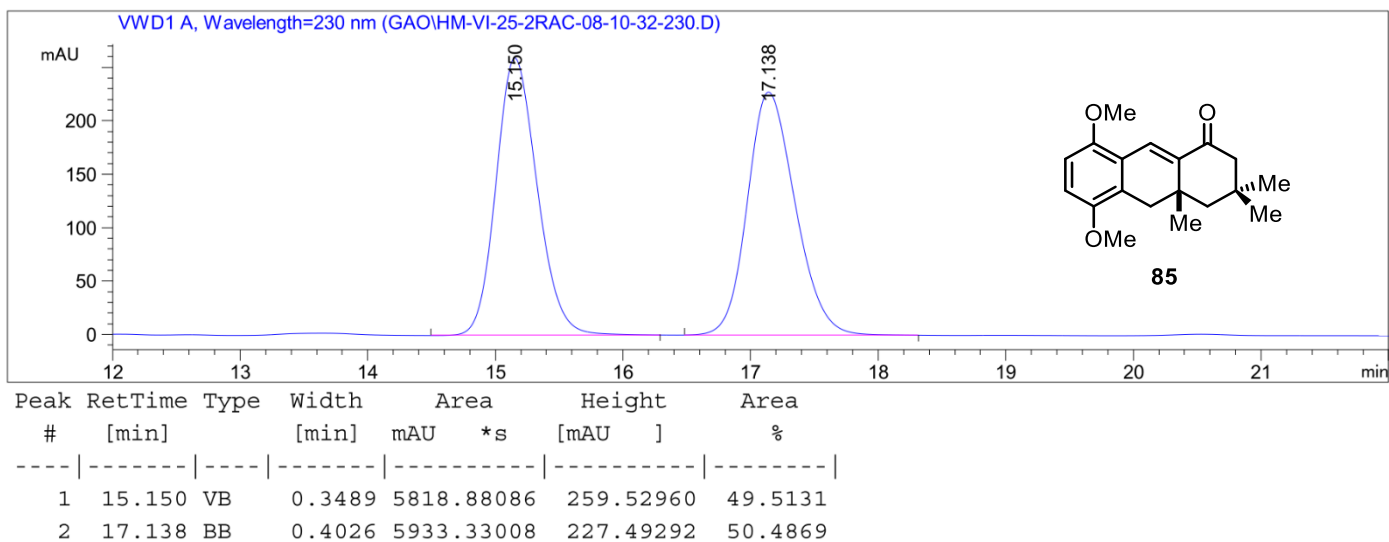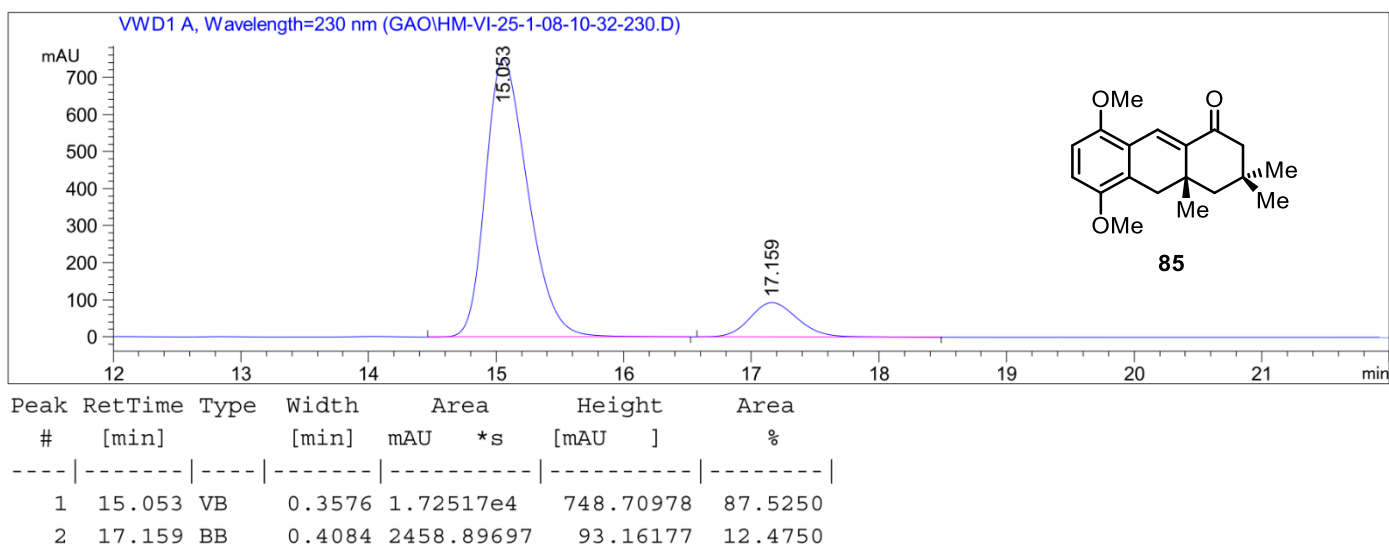

Enantiomeric excess: 75%, determined by HPLC (Daicel Chiralpak IG, hexane/isopropanol = 90/10, flow rate 0.8 mL/min, T = 25 °C, 230 nm):  $t_R = 15.053$  min (major),  $t_R = 17.159$  min (minor).



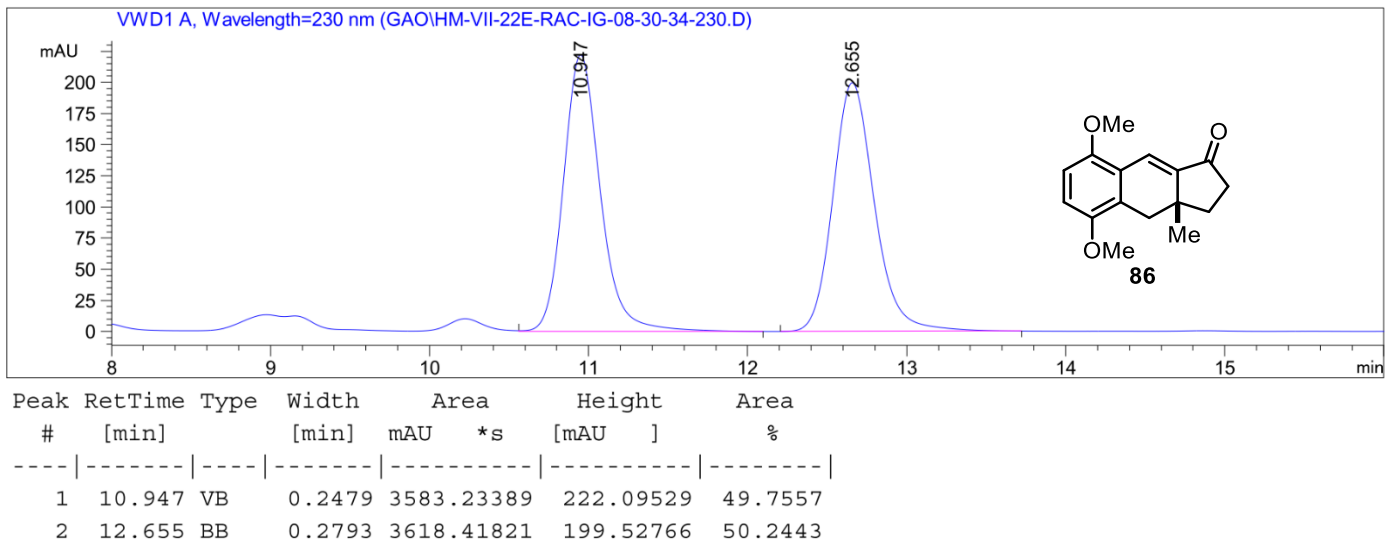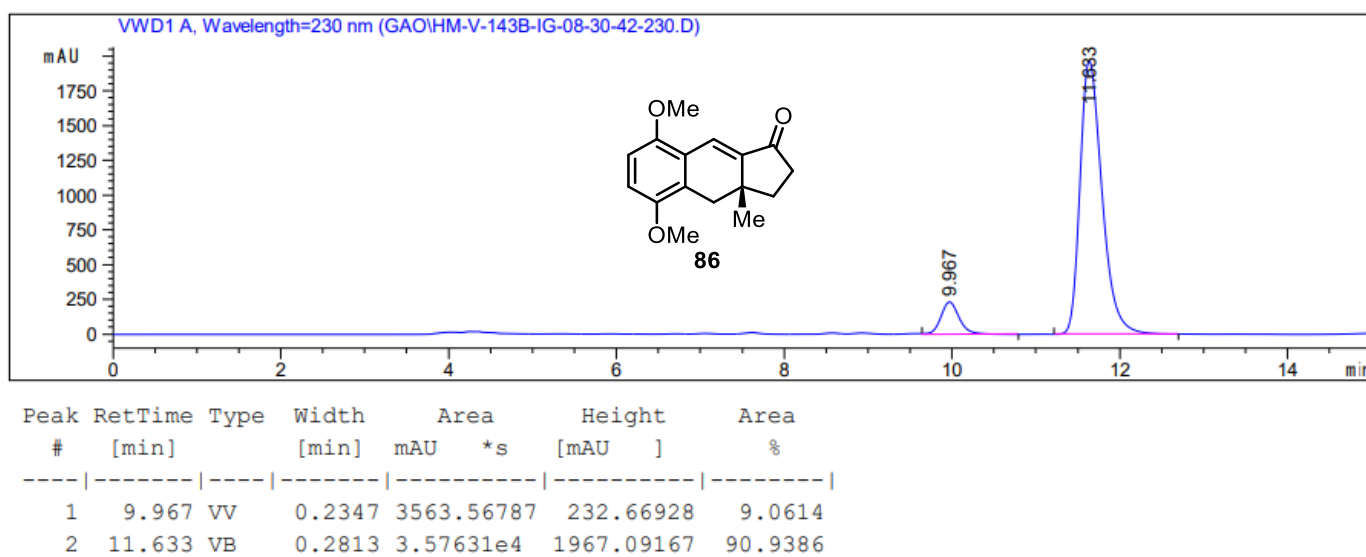

Enantiomeric excess: 82%, determined by HPLC (Daicel Chiralpak IG, hexane/isopropanol = 70/30, flow rate 0.8 mL/min, T = 25 °C, 230 nm):  $t_R = 9.967$  min (minor),  $t_R = 11.633$  min (major).

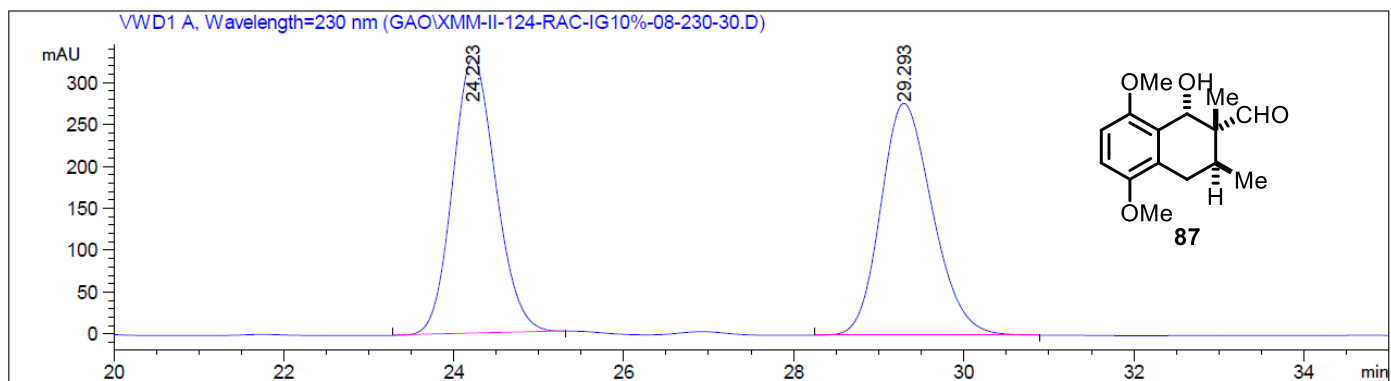

| Peak # | RetTime [min] | Type | Width [min] | Area mAU  | Area *s | Height [mAU] | Area %  |
|--------|---------------|------|-------------|-----------|---------|--------------|---------|
| 1      | 24.223        | BB   | 0.5405      | 1.15735e4 |         | 328.62750    | 49.6603 |
| 2      | 29.293        | BB   | 0.6513      | 1.17319e4 |         | 276.65631    | 50.3397 |

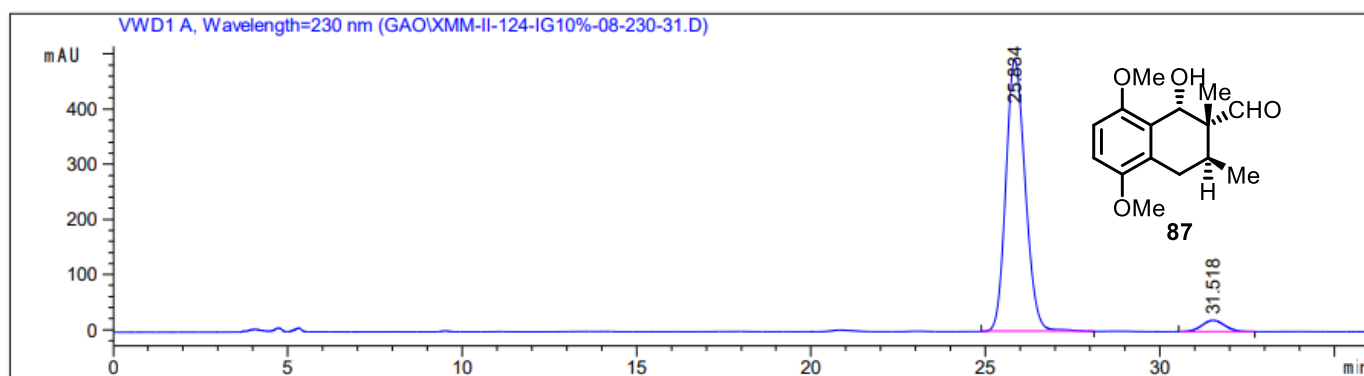

| Peak # | RetTime [min] | Type | Width [min] | Area mAU  | Area *s | Height [mAU] | Area %  |
|--------|---------------|------|-------------|-----------|---------|--------------|---------|
| 1      | 25.834        | BB   | 0.6006      | 1.90821e4 |         | 492.42712    | 95.3283 |
| 2      | 31.518        | BB   | 0.6618      | 935.14429 |         | 20.49733     | 4.6717  |

Enantiomeric excess: 91%, determined by HPLC (Daicel Chiralpak IG, hexane/isopropanol = 90/10, flow rate 0.8 mL/min, T = 25 °C, 230 nm):  $t_R = 25.834$  min (major),  $t_R = 31.518$  min (minor).

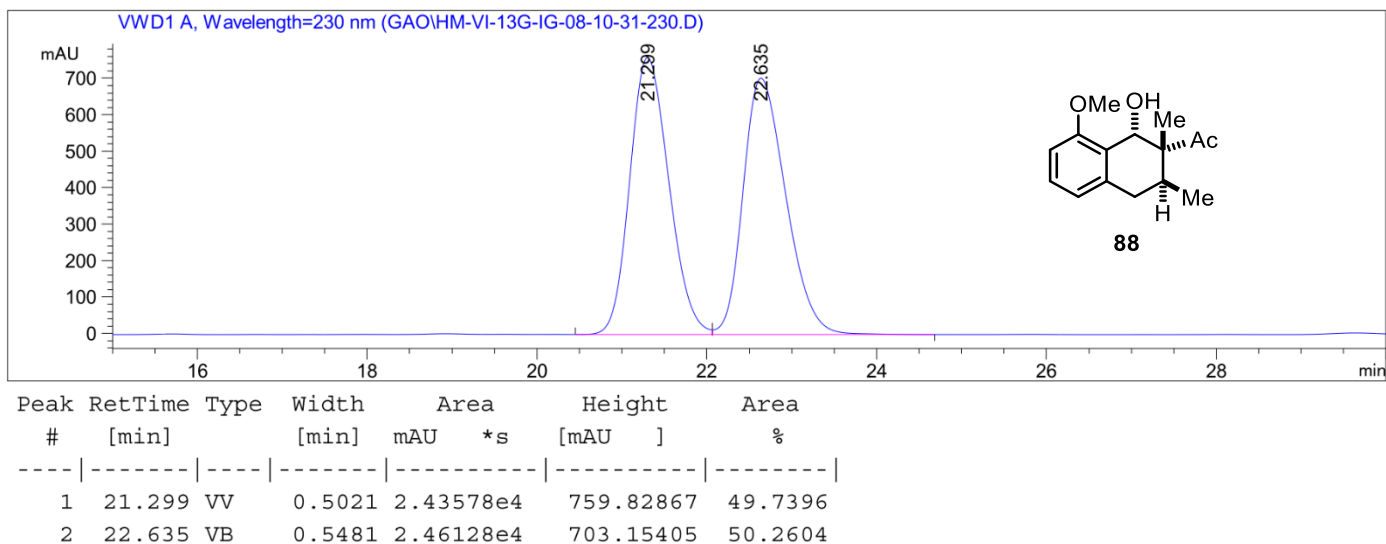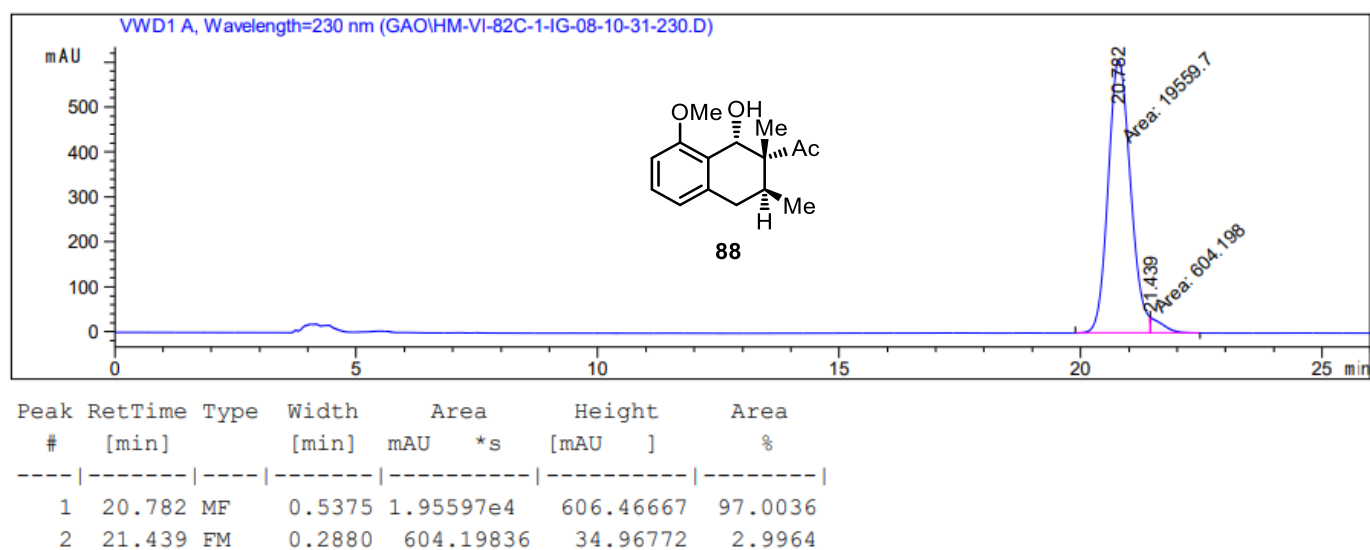

Enantiomeric excess: 94%, determined by HPLC (Daicel Chiralpak IG, hexane/isopropanol = 90/10, flow rate 0.8 mL/min, T = 25 °C, 230 nm):  $t_R = 20.782$ min (major),  $t_R = 21.418$  min (minor).

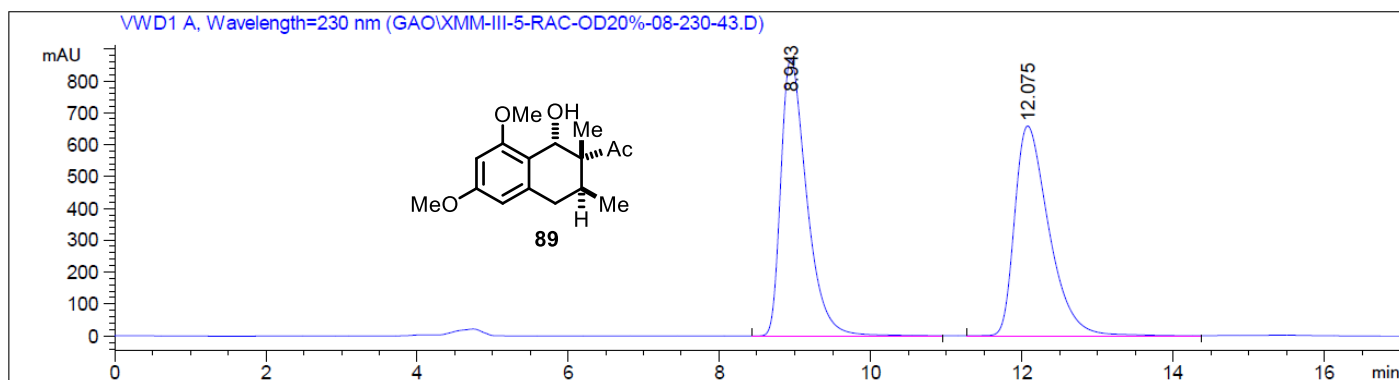

| Peak # | RetTime [min] | Type | Width [min] | Area mAU *s | Height [mAU] | Area %  |
|--------|---------------|------|-------------|-------------|--------------|---------|
| 1      | 8.943         | VV   | 0.3595      | 2.07208e4   | 869.66071    | 49.8441 |
| 2      | 12.075        | VV   | 0.4798      | 2.08505e4   | 658.99695    | 50.1559 |

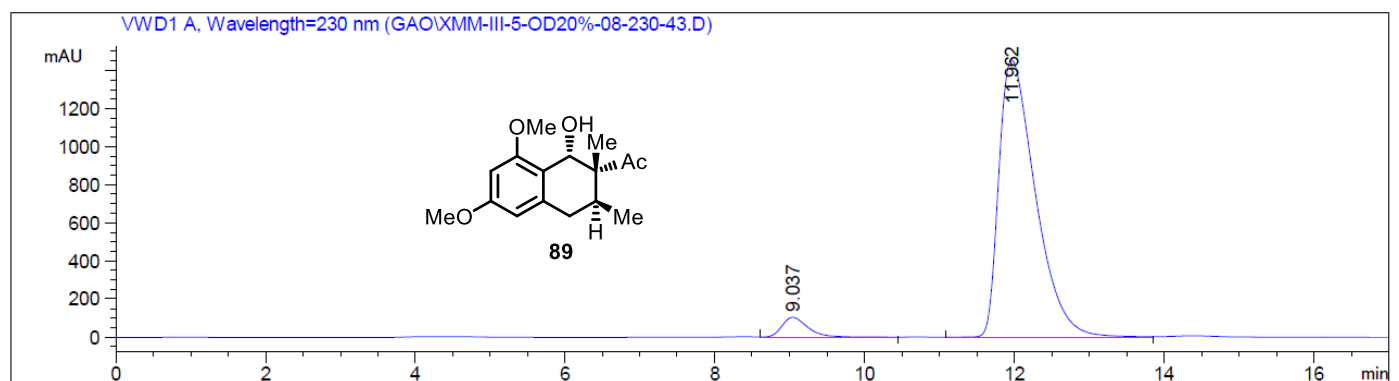

| Peak # | RetTime [min] | Type | Width [min] | Area mAU *s | Height [mAU] | Area %  |
|--------|---------------|------|-------------|-------------|--------------|---------|
| 1      | 9.037         | VV   | 0.3745      | 2570.51733  | 104.45625    | 4.9388  |
| 2      | 11.962        | VV   | 0.5245      | 4.94774e4   | 1456.26233   | 95.0612 |

Enantiomeric excess: 90%, determined by HPLC (Daicel Chiralpak OD-H, hexane/isopropanol = 80/ 20, flow rate 0.8 mL/min, T = 25 °C, 230 nm):  $t_R = 9.037$  min (minor),  $t_R = 11.962$  min (major).

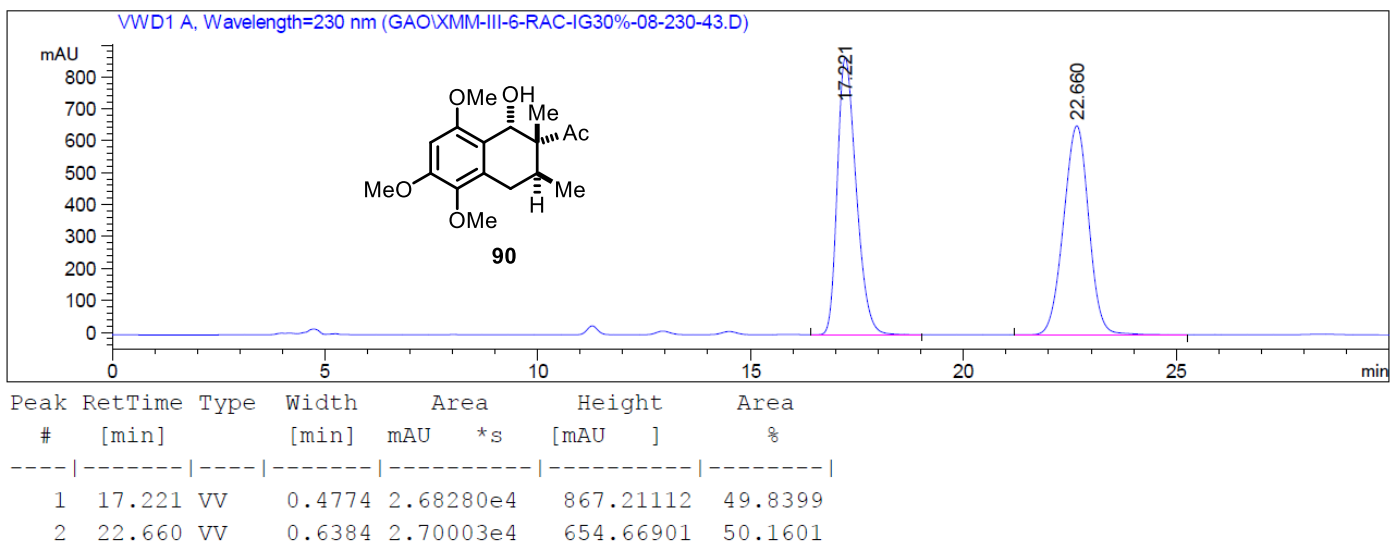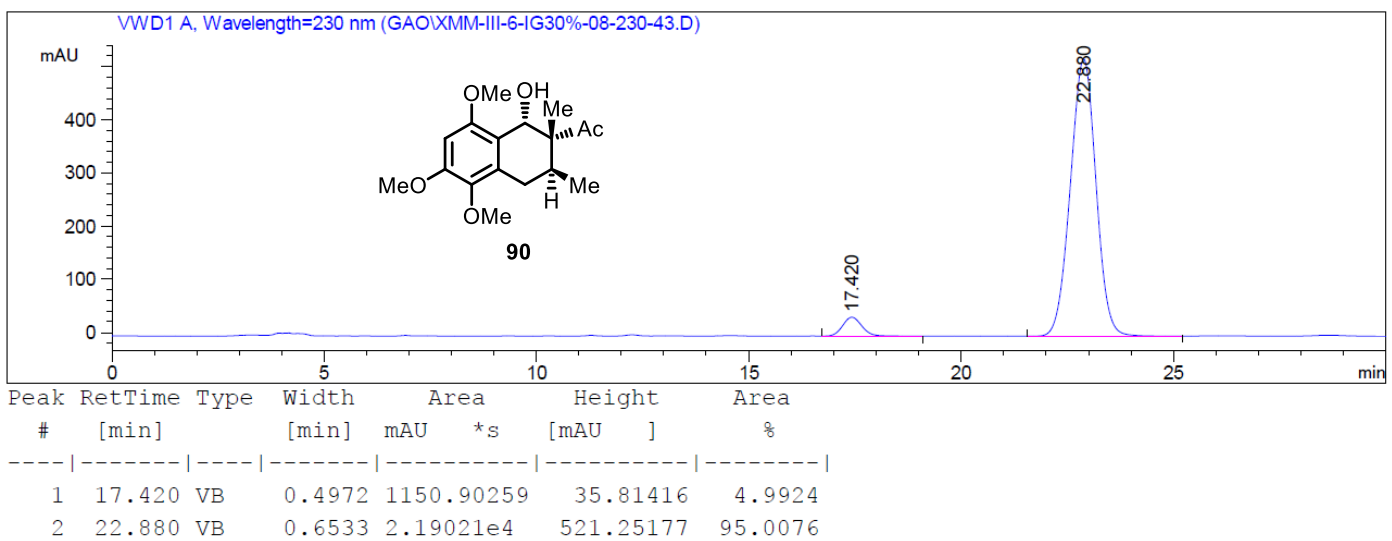

Enantiomeric excess: 90%, determined by HPLC (Daicel Chiralpak IG, hexane/isopropanol = 70/30, flow rate 0.8 mL/min, T = 25 °C, 230 nm):  $t_R = 17.420$  min (minor),  $t_R = 22.880$  min (major).

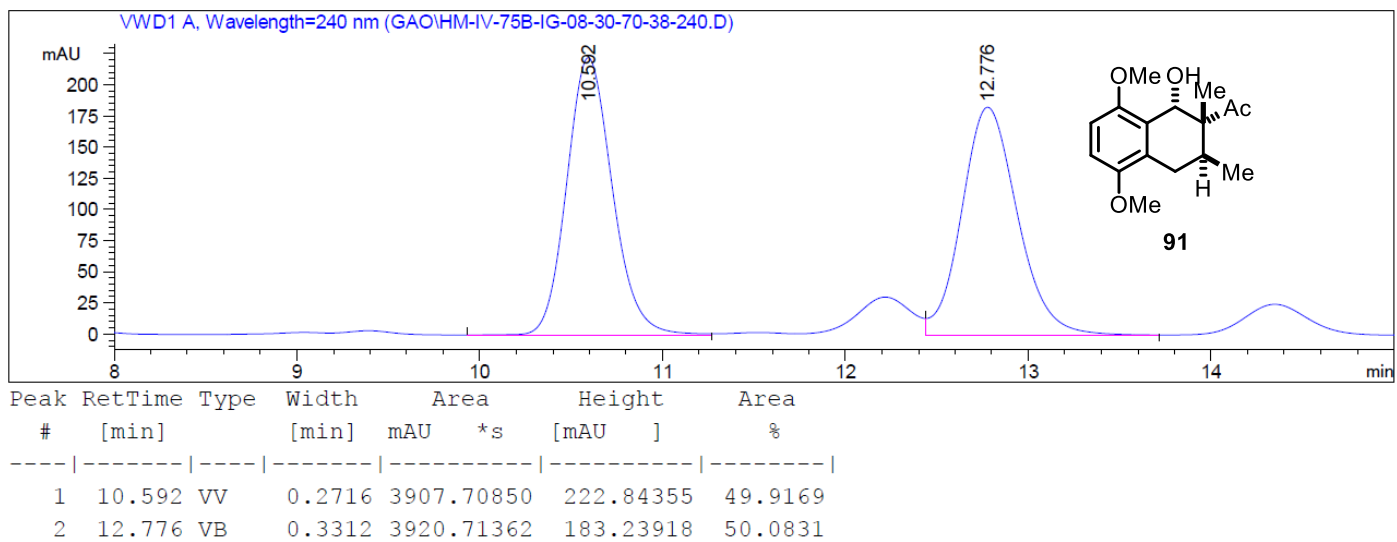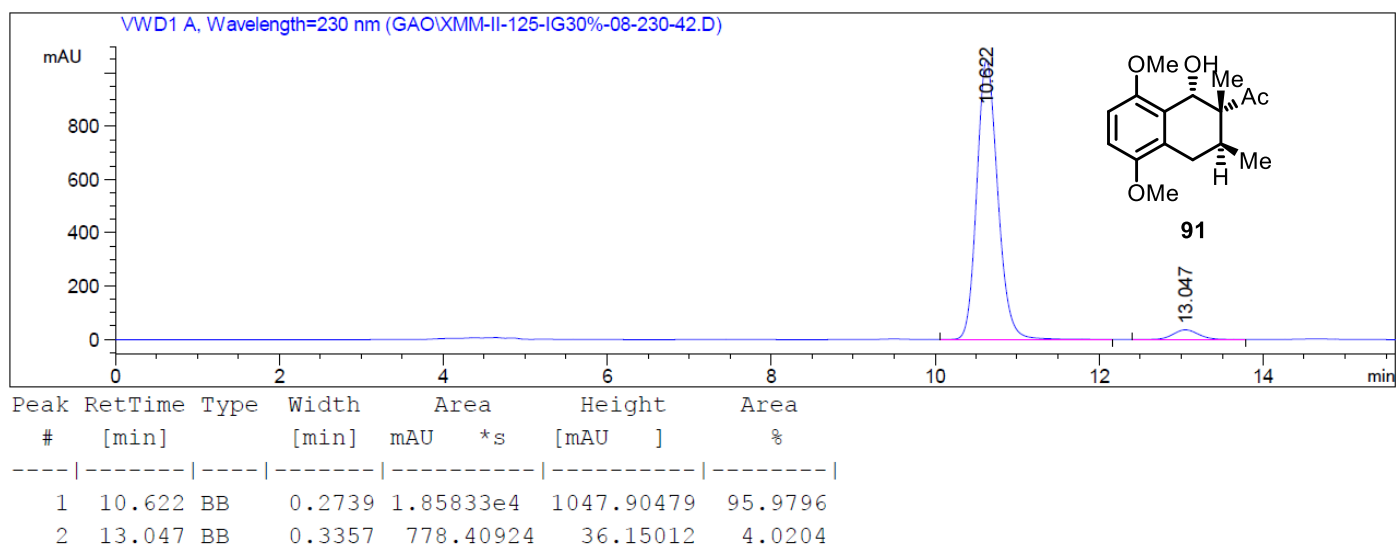

Enantiomeric excess: 92%, determined by HPLC (Daicel Chiralpak IG, hexane/isopropanol = 70/30, flow rate 0.8 mL/min, T = 25 °C, 230 nm):  $t_R$  = 10.622 min (major),  $t_R$  = 13.047 min (minor).

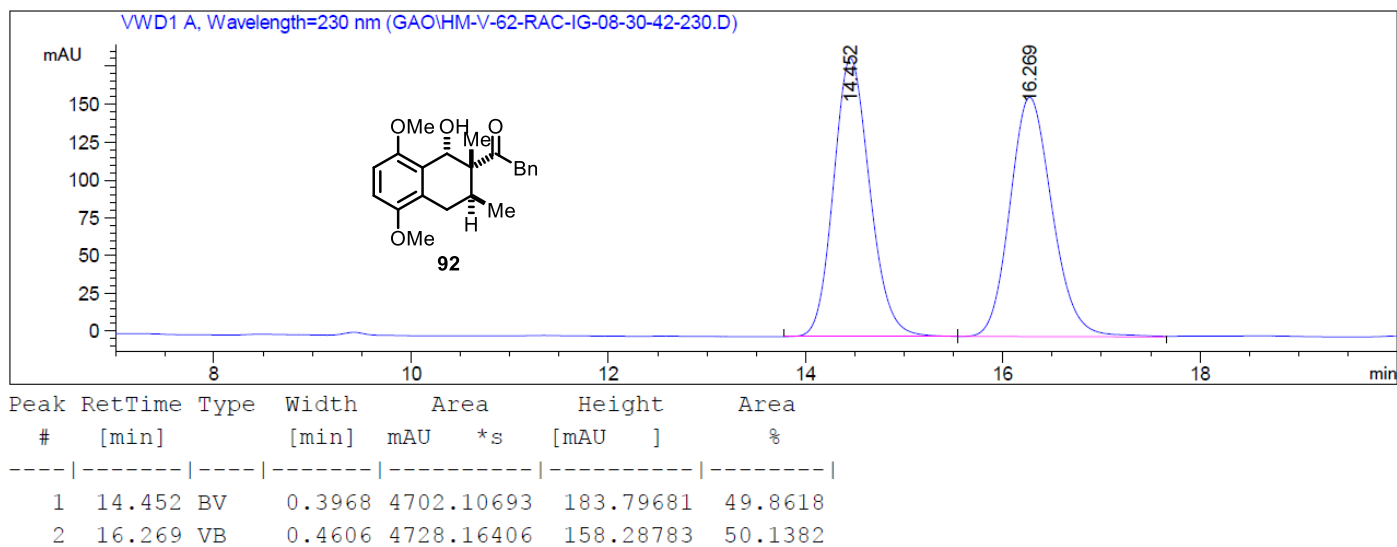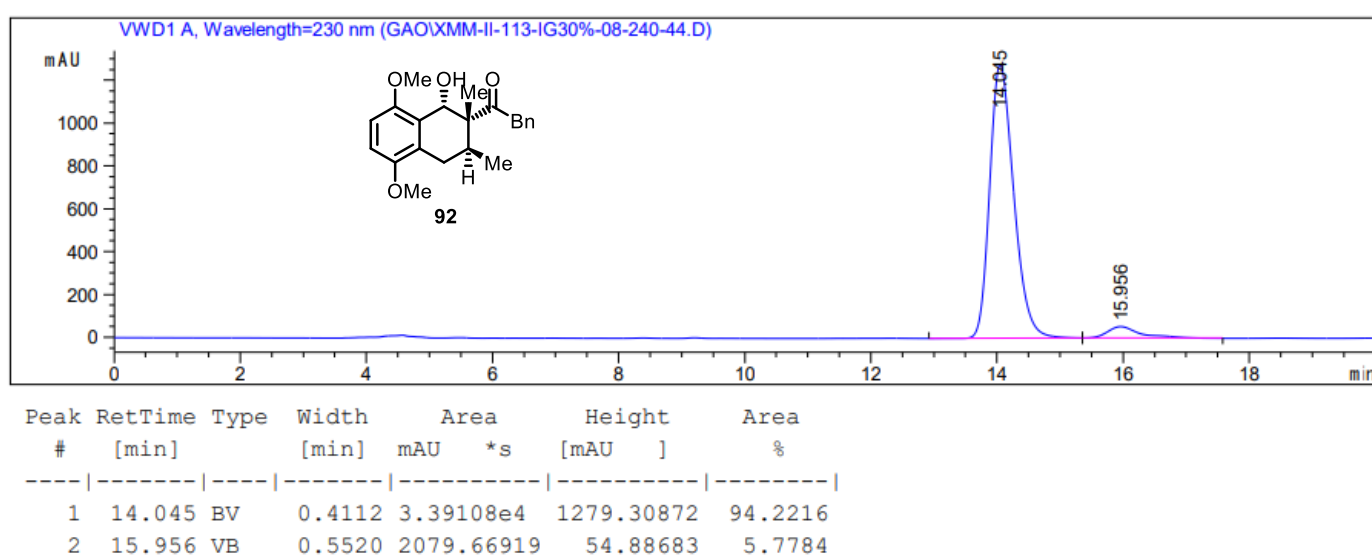

Enantiomeric excess: 88%, determined by HPLC (Daicel Chiralpak IG, hexane/isopropanol = 70/30, flow rate 0.8 mL/min, T = 25 °C, 230 nm):  $t_R = 14.045$  min (major),  $t_R = 15.956$  min (minor).

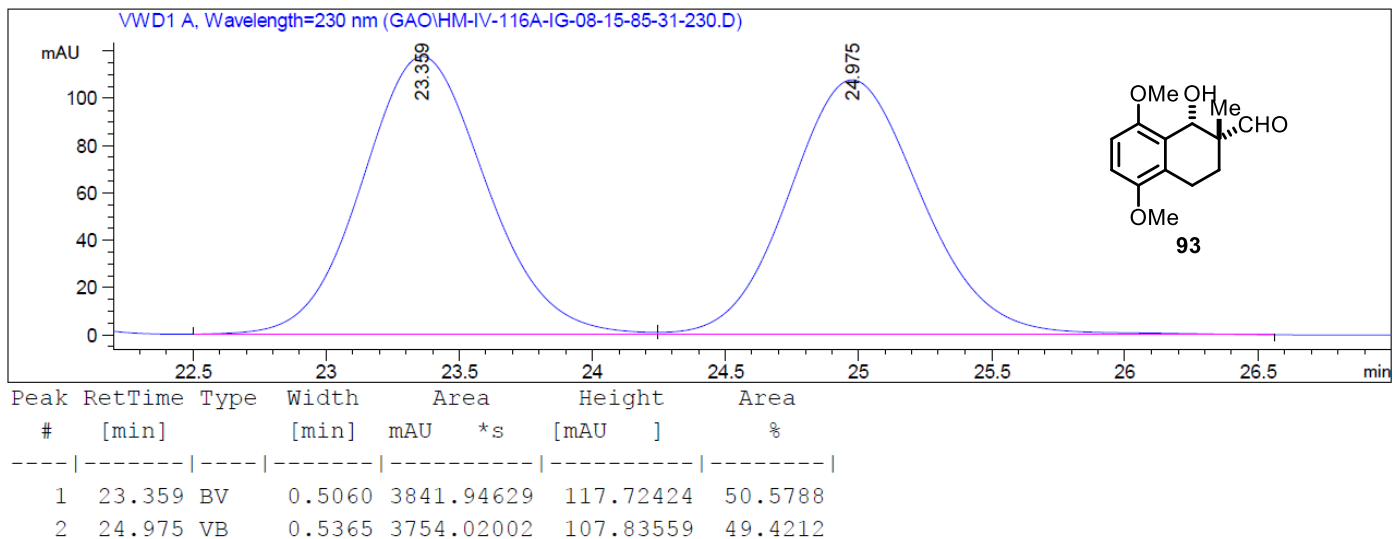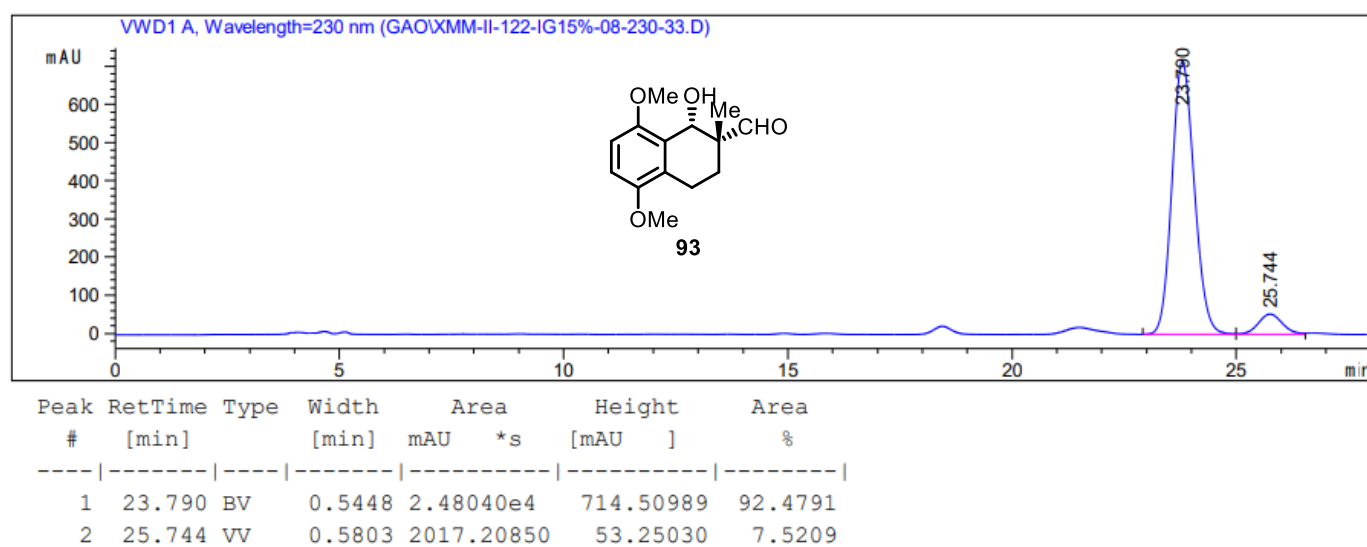

Enantiomeric excess: 85%, determined by HPLC (Daicel Chiralpak IG, hexane/isopropanol = 85/15, flow rate 0.8 mL/min, T = 25 °C, 230 nm):  $t_R = 23.790$  min (major),  $t_R = 25.744$  min (minor).



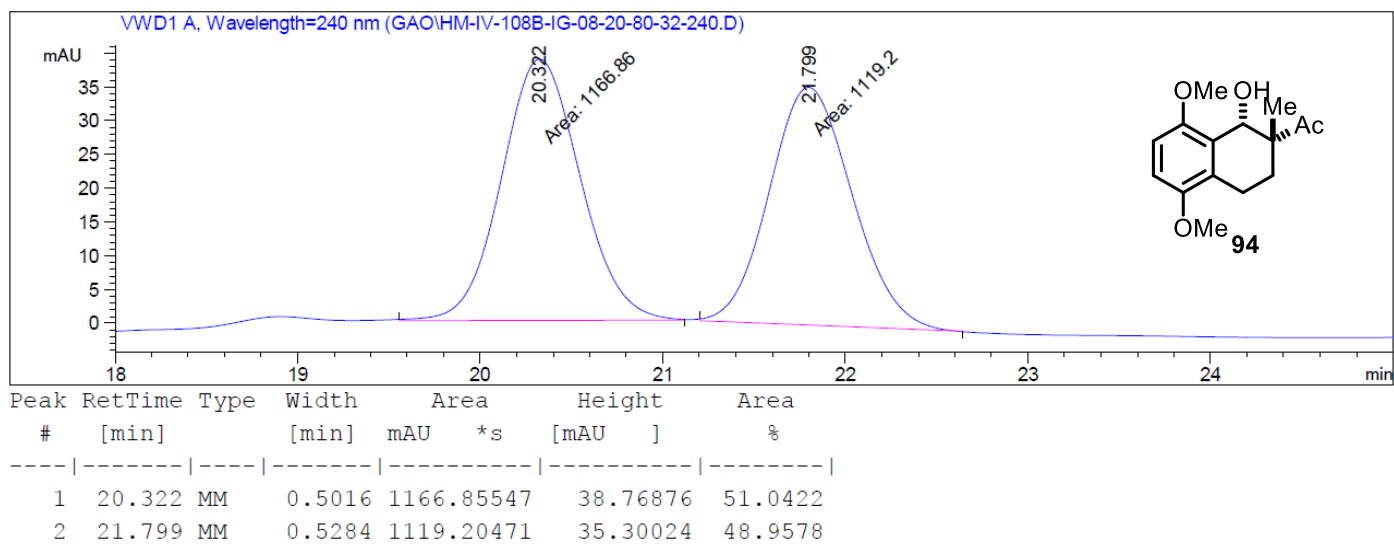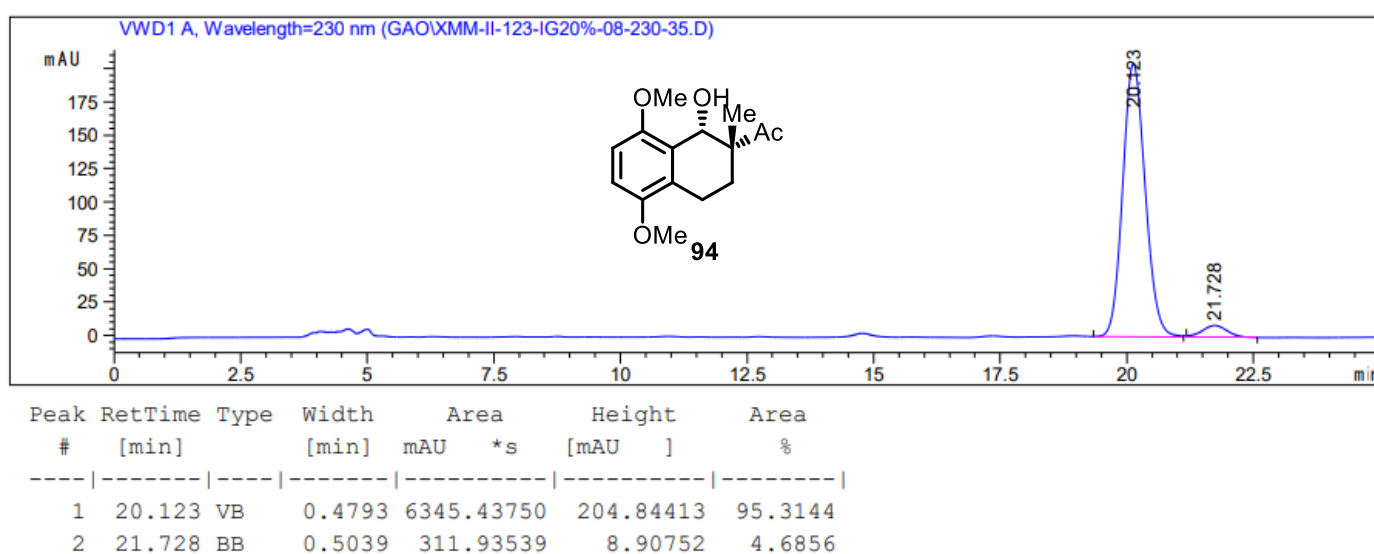

Enantiomeric excess: 91%, determined by HPLC (Daicel Chiralpak IG, hexane/isopropanol = 80/ 20, flow rate 0.8 mL/min, T = 25 °C, 230 nm):  $t_R = 20.123$  min (major),  $t_R = 21.728$  min (minor).
